# Supplementary material for: From Proteomics to Personalized Medicine: The Importance of Isoflavone Dose and Estrogen Receptor Status in Breast Cancer Cells
Source: MDPI journal article supplement (doi:10.3390/jpm10040292), 2020-12-19
Supplement: s1 [file s1]

Supplementary Table S1. Overview on the abundance of all relatively quantified 5180 proteins

| Protein name | UniProt | control 01 | control 02 | control 03 | Dai IC20 01 | Dai IC20 02 | Dai IC20 03 | Dai SC20 01 | Dai SC20 02 | Dai SC20 03 | Gen IC20 01 | Gen IC20 02 | Gen IC20 03 | Gen SC20 01 | Gen SC20 02 | Gen SC20 03 | control 01 | control 02 | Dai IC20 01 | Dai IC20 02 | Dai IC20 03 | Gen IC20 01 | Gen IC20 02 | Gen IC20 03 | Gen SC20 01 | Gen SC20 02 | Gen SC20 03 | control 01 | control 02 | Dai IC20 01 | Dai IC20 02 | Dai IC20 03 | Gen IC20 01 | Gen IC20 02 | Gen IC20 03 | Gen SC20 01 | Gen SC20 02 | Gen SC20 03 | control 01 | control 02 | Dai IC20 01 | Dai IC20 02 | Dai IC20 03 | Gen IC20 01 | Gen IC20 02 | Gen IC20 03 | Gen SC20 01 | Gen SC20 02 | Gen SC20 03 | control 01 | control 02 | Dai IC20 01 | Dai IC20 02 | Dai IC20 03 | Gen IC20 01 | Gen IC20 02 | Gen IC20 03 | Gen SC20 01 | Gen SC20 02 | Gen SC20 03 | control 01 | control 02 | Dai IC20 01 | Dai IC20 02 | Dai IC20 03 | Gen IC20 01 | Gen IC20 02 | Gen IC20 03 | Gen SC20 01 | Gen SC20 02 | Gen SC20 03 | control 01 | control 02 | Dai IC20 01 | Dai IC20 02 | Dai IC20 03 | Gen IC20 01 | Gen IC20 02 | Gen IC20 03 | Gen SC20 01 | Gen SC20 02 | Gen SC20 03 | control 01 | control 02 | Dai IC20 01 | Dai IC20 02 | Dai IC20 03 | Gen IC20 01 | Gen IC20 02 | Gen IC20 03 | Gen SC20 01 | Gen SC20 02 | Gen SC20 03 | control 01 | control 02 | Dai IC20 01 | Dai IC20 02 | Dai IC20 03 | Gen IC20 01 | Gen IC20 02 | Gen IC20 03 | Gen SC20 01 | Gen SC20 02 | Gen SC20 03 | control 01 | control 02 | Dai IC20 01 | Dai IC20 02 | Dai IC20 03 | Gen IC20 01 | Gen IC20 02 | Gen IC20 03 | Gen SC20 01 | Gen SC20 02 | Gen SC20 03 | control 01 | control 02 | Dai IC20 01 | Dai IC20 02 | Dai IC20 03 | Gen IC20 01 | Gen IC20 02 | Gen IC20 03 | Gen SC20 01 | Gen SC20 02 | Gen SC20 03 | control 01 | control 02 | Dai IC20 01 | Dai IC20 02 | Dai IC20 03 | Gen IC20 01 | Gen IC20 02 | Gen IC20 03 | Gen SC20 01 | Gen SC20 02 | Gen SC20 03 | control 01 | control 02 | Dai IC20 01 | Dai IC20 02 | Dai IC20 03 | Gen IC20 01 | Gen IC20 02 | Gen IC20 03 | Gen SC20 01 | Gen SC20 02 | Gen SC20 03 | control 01 | control 02 | Dai IC20 01 | Dai IC20 02 | Dai IC20 03 | Gen IC20 01 | Gen IC20 02 | Gen IC20 03 | Gen SC20 01 | Gen SC20 02 | Gen SC20 03 | control 01 | control 02 | Dai IC20 01 | Dai IC20 02 | Dai IC20 03 | Gen IC20 01 | Gen IC20 02 | Gen IC20 03 | Gen SC20 01 | Gen SC20 02 | Gen SC20 03 | control 01 | control 02 | Dai IC20 01 | Dai IC20 02 | Dai IC20 03 | Gen IC20 01 | Gen IC20 02 | Gen IC20 03 | Gen SC20 01 | Gen SC20 02 | Gen SC20 03 | control 01 | control 02 | Dai IC20 01 | Dai IC20 02 | Dai IC20 03 | Gen IC20 01 | Gen IC20 02 | Gen IC20 03 | Gen SC20 01 | Gen SC20 02 | Gen SC20 03 | control 01 | control 02 | Dai IC20 01 | Dai IC20 02 | Dai IC20 03 | Gen IC20 01 | Gen IC20 02 | Gen IC20 03 | Gen SC20 01 | Gen SC20 02 | Gen SC20 03 | control 01 | control 02 | Dai IC20 01 | Dai IC20 02 | Dai IC20 03 | Gen IC20 01 | Gen IC20 02 | Gen IC20 03 | Gen SC20 01 | Gen SC20 02 | Gen SC20 03 | control 01 | control 02 | Dai IC20 01 | Dai IC20 02 | Dai IC20 03 | Gen IC20 01 | Gen IC20 02 | Gen IC20 03 | Gen SC20 01 | Gen SC20 02 | Gen SC20 03 | control 01 | control 02 | Dai IC20 01 | Dai IC20 02 | Dai IC20 03 | Gen IC20 01 | Gen IC20 02 | Gen IC20 03 | Gen SC20 01 | Gen SC20 02 | Gen SC20 03 | control 01 | control 02 | Dai IC20 01 | Dai IC20 02 | Dai IC20 03 | Gen IC20 01 | Gen IC20 02 | Gen IC20 03 | Gen SC20 01 | Gen SC20 02 | Gen SC20 03 | control 01 | control 02 | Dai IC20 01 | Dai IC20 02 | Dai IC20 03 | Gen IC20 01 | Gen IC20 02 | Gen IC20 03 | Gen SC20 01 | Gen SC20 02 | Gen SC20 03 | control 01 | control 02 | Dai IC20 01 | Dai IC20 02 | Dai IC20 03 | Gen IC20 01 | Gen IC20 02 | Gen IC20 03 | Gen SC20 01 | Gen SC20 02 | Gen SC20 03 | control 01 | control 02 | Dai IC20 01 | Dai IC20 02 | Dai IC20 03 | Gen IC20 01 | Gen IC20 02 | Gen IC20 03 | Gen SC20 01 | Gen SC20 02 | Gen SC20 03 | control 01 | control 02 | Dai IC20 01 | Dai IC20 02 | Dai IC20 03 | Gen IC20 01 | Gen IC20 02 | Gen IC20 03 | Gen SC20 01 | Gen SC20 02 | Gen SC20 03 | control 01 | control 02 | Dai IC20 01 | Dai IC20 02 | Dai IC20 03 | Gen IC20 01 | Gen IC20 02 | Gen IC20 03 | Gen SC20 01 | Gen SC20 02 | Gen SC20 03 | control 01 | control 02 | Dai IC20 01 | Dai IC20 02 | Dai IC20 03 | Gen IC20 01 | Gen IC20 02 | Gen IC20 03 | Gen SC20 01 | Gen SC20 02 | Gen SC20 03 | control 01 | control 02 | Dai IC20 01 | Dai IC20 02 | Dai IC20 03 | Gen IC20 01 | Gen IC20 02 | Gen IC20 03 | Gen SC20 01 | Gen SC20 02 | Gen SC20 03 | control 01 | control 02 | Dai IC20 01 | Dai IC20 02 | Dai IC20 03 | Gen IC20 01 | Gen IC20 02 | Gen IC20 03 | Gen SC20 01 | Gen SC20 02 | Gen SC20 03 | control 01 | control 02 | Dai IC20 01 | Dai IC20 02 | Dai IC20 03 | Gen IC20 01 | Gen IC20 02 | Gen IC20 03 | Gen SC20 01 | Gen SC20 02 | Gen SC20 03 | control 01 | control 02 | Dai IC20 01 | Dai IC20 02 | Dai IC20 03 | Gen IC20 01 | Gen IC20 02 | Gen IC20 03 | Gen SC20 01 | Gen SC20 02 | Gen SC20 03 | control 01 | control 02 | Dai IC20 01 | Dai IC20 02 | Dai IC20 03 | Gen IC20 01 | Gen IC20 02 | Gen IC20 03 | Gen SC20 01 | Gen SC20 02 | Gen SC20 03 | control 01 | control 02 | Dai IC20 01 | Dai IC20 02 | Dai IC20 03 | Gen IC20 01 | Gen IC20 02 | Gen IC20 03 | Gen SC20 01 | Gen SC20 02 | Gen SC20 03 | control 01 | control 02 | Dai IC20 01 | Dai IC20 02 | Dai IC20 03 | Gen IC20 01 | Gen IC20 02 | Gen IC20 03 | Gen SC20 01 | Gen SC20 02 | Gen SC20 03 | control 01 | control 02 | Dai IC20 01 | Dai IC20 02 | Dai IC20 03 | Gen IC20 01 | Gen IC20 02 | Gen IC20 03 | Gen SC20 01 | Gen SC20 02 | Gen SC20 03 | control 01 | control 02 | Dai IC20 01 | Dai IC20 02 | Dai IC20 03 | Gen IC20 01 | Gen IC20 02 | Gen IC20 03 | Gen SC20 01 | Gen SC20 02 | Gen SC20 03 | control 01 | control 02 | Dai IC20 01 | Dai IC20 02 | Dai IC20 03 | Gen IC20 01 | Gen IC20 02 | Gen IC20 03 | Gen SC20 01 | Gen SC20 02 | Gen SC20 03 | control 01 | control 02 | Dai IC20 01 | Dai IC20 02 | Dai IC20 03 | Gen IC20 01 | Gen IC20 02 | Gen IC20 03 | Gen SC20 01 | Gen SC20 02 | Gen SC20 03 | control 01 | control 02 | Dai IC20 01 | Dai IC20 02 | Dai IC20 03 | Gen IC20 01 | Gen IC20 02 | Gen IC20 03 | Gen SC20 01 | Gen SC20 02 | Gen SC20 03 | control 01 | control 02 | Dai IC20 01 | Dai IC20 02 | Dai IC20 03 | Gen IC20 01 | Gen IC20 02 | Gen IC20 03 | Gen SC20 01 | Gen SC20 02 | Gen SC20 03 | control 01 | control 02 | Dai IC20 01 | Dai IC20 02 | Dai IC20 03 | Gen IC20 01 | Gen IC20 02 | Gen IC20 03 | Gen SC20 01 | Gen SC20 02 | Gen SC20 03 | control 01 | control 02 | Dai IC20 01 | Dai IC20 02 | Dai IC20 03 | Gen IC20 01 | Gen IC20 02 | Gen IC20 03 | Gen SC20 01 | Gen SC20 02 | Gen SC20 03 | control 01 | control 02 | Dai IC20 01 | Dai IC20 02 | Dai IC20 03 | Gen IC20 01 | Gen IC20 02 | Gen IC20 03 | Gen SC20 01 | Gen SC20 02 | Gen SC20 03 | control 01 | control 02 | Dai IC20 01 | Dai IC20 02 | Dai IC20 03 | Gen IC20 01 | Gen IC20 02 | Gen IC20 03 | Gen SC20 01 | Gen SC20 02 | Gen SC20 03 | control 01 | control 02 | Dai IC20 01 | Dai IC20 02 | Dai IC20 03 | Gen IC20 01 | Gen IC20 02 | Gen IC20 03 | Gen SC20 01 | Gen SC20 02 | Gen SC20 03 | control 01 | control 02 | Dai IC20 01 | Dai IC20 02 | Dai IC20 03 | Gen IC20 01 | Gen IC20 02 | Gen IC20 03 | Gen SC20 01 | Gen SC20 02 | Gen SC20 03 | control 01 | control 02 | Dai IC20 01 | Dai IC20 02 | Dai IC20 03 | Gen IC20 01 | Gen IC20 02 | Gen IC20 03 | Gen SC20 01 | Gen SC20 02 | Gen SC20 03 | control 01 | control 02 | Dai IC20 01 | Dai IC20 02 | Dai IC20 03 | Gen IC20 01 | Gen IC20 02 | Gen IC20 03 | Gen SC20 01 | Gen SC20 02 | Gen SC20 03 | control 01 | control 02 | Dai IC20 01 | Dai IC20 02 | Dai IC20 03 | Gen IC20 01 | Gen IC20 02 | Gen IC20 03 | Gen SC20 01 | Gen SC20 02 | Gen SC20 03 | control 01 | control 02 | Dai IC20 01 | Dai IC20 02 | Dai IC20 03 | Gen IC20 01 | Gen IC20 02 | Gen IC20 03 | Gen SC20 01 | Gen SC20 02 | Gen SC20 03 | control 01 | control 02 | Dai IC20 01 | Dai IC20 02 | Dai IC20 03 | Gen IC20 01 | Gen IC20 02 | Gen IC20 03 | Gen SC20 01 | Gen SC20 02 | Gen SC20 03 | control 01 | control 02 | Dai IC20 01 | Dai IC20 02 | Dai IC20 03 | Gen IC20 01 | Gen IC20 02 | Gen IC20 03 | Gen SC20 01 | Gen SC20 02 | Gen SC20 03 | control 01 | control 02 | Dai IC20 01 | Dai IC20 02 | Dai IC20 03 | Gen IC20 01 | Gen IC20 02 | Gen IC20 03 | Gen SC20 01 | Gen SC20 02 | Gen SC20 03 | control 01 | control 02 | Dai IC20 01 | Dai IC20 02 | Dai IC20 03 | Gen IC20 01 | Gen IC20 02 | Gen IC20 03 | Gen SC20 01 | Gen SC20 02 | Gen SC20 03 | control 01 | control 02 | Dai IC20 01 | Dai IC20 02 | Dai IC20 03 | Gen IC20 01 | Gen IC20 02 | Gen IC20 03 | Gen SC20 01 | Gen SC20 02 | Gen SC20 03 | control 01 | control 02 |
|--------------|---------|------------|------------|------------|-------------|-------------|-------------|-------------|-------------|-------------|-------------|-------------|-------------|-------------|-------------|-------------|------------|------------|-------------|-------------|-------------|-------------|-------------|-------------|-------------|-------------|-------------|------------|------------|-------------|-------------|-------------|-------------|-------------|-------------|-------------|-------------|-------------|------------|------------|-------------|-------------|-------------|-------------|-------------|-------------|-------------|-------------|-------------|------------|------------|-------------|-------------|-------------|-------------|-------------|-------------|-------------|-------------|-------------|------------|------------|-------------|-------------|-------------|-------------|-------------|-------------|-------------|-------------|-------------|------------|------------|-------------|-------------|-------------|-------------|-------------|-------------|-------------|-------------|-------------|------------|------------|-------------|-------------|-------------|-------------|-------------|-------------|-------------|-------------|-------------|------------|------------|-------------|-------------|-------------|-------------|-------------|-------------|-------------|-------------|-------------|------------|------------|-------------|-------------|-------------|-------------|-------------|-------------|-------------|-------------|-------------|------------|------------|-------------|-------------|-------------|-------------|-------------|-------------|-------------|-------------|-------------|------------|------------|-------------|-------------|-------------|-------------|-------------|-------------|-------------|-------------|-------------|------------|------------|-------------|-------------|-------------|-------------|-------------|-------------|-------------|-------------|-------------|------------|------------|-------------|-------------|-------------|-------------|-------------|-------------|-------------|-------------|-------------|------------|------------|-------------|-------------|-------------|-------------|-------------|-------------|-------------|-------------|-------------|------------|------------|-------------|-------------|-------------|-------------|-------------|-------------|-------------|-------------|-------------|------------|------------|-------------|-------------|-------------|-------------|-------------|-------------|-------------|-------------|-------------|------------|------------|-------------|-------------|-------------|-------------|-------------|-------------|-------------|-------------|-------------|------------|------------|-------------|-------------|-------------|-------------|-------------|-------------|-------------|-------------|-------------|------------|------------|-------------|-------------|-------------|-------------|-------------|-------------|-------------|-------------|-------------|------------|------------|-------------|-------------|-------------|-------------|-------------|-------------|-------------|-------------|-------------|------------|------------|-------------|-------------|-------------|-------------|-------------|-------------|-------------|-------------|-------------|------------|------------|-------------|-------------|-------------|-------------|-------------|-------------|-------------|-------------|-------------|------------|------------|-------------|-------------|-------------|-------------|-------------|-------------|-------------|-------------|-------------|------------|------------|-------------|-------------|-------------|-------------|-------------|-------------|-------------|-------------|-------------|------------|------------|-------------|-------------|-------------|-------------|-------------|-------------|-------------|-------------|-------------|------------|------------|-------------|-------------|-------------|-------------|-------------|-------------|-------------|-------------|-------------|------------|------------|-------------|-------------|-------------|-------------|-------------|-------------|-------------|-------------|-------------|------------|------------|-------------|-------------|-------------|-------------|-------------|-------------|-------------|-------------|-------------|------------|------------|-------------|-------------|-------------|-------------|-------------|-------------|-------------|-------------|-------------|------------|------------|-------------|-------------|-------------|-------------|-------------|-------------|-------------|-------------|-------------|------------|------------|-------------|-------------|-------------|-------------|-------------|-------------|-------------|-------------|-------------|------------|------------|-------------|-------------|-------------|-------------|-------------|-------------|-------------|-------------|-------------|------------|------------|-------------|-------------|-------------|-------------|-------------|-------------|-------------|-------------|-------------|------------|------------|-------------|-------------|-------------|-------------|-------------|-------------|-------------|-------------|-------------|------------|------------|-------------|-------------|-------------|-------------|-------------|-------------|-------------|-------------|-------------|------------|------------|-------------|-------------|-------------|-------------|-------------|-------------|-------------|-------------|-------------|------------|------------|-------------|-------------|-------------|-------------|-------------|-------------|-------------|-------------|-------------|------------|------------|-------------|-------------|-------------|-------------|-------------|-------------|-------------|-------------|-------------|------------|------------|-------------|-------------|-------------|-------------|-------------|-------------|-------------|-------------|-------------|------------|------------|-------------|-------------|-------------|-------------|-------------|-------------|-------------|-------------|-------------|------------|------------|-------------|-------------|-------------|-------------|-------------|-------------|-------------|-------------|-------------|------------|------------|-------------|-------------|-------------|-------------|-------------|-------------|-------------|-------------|-------------|------------|------------|-------------|-------------|-------------|-------------|-------------|-------------|-------------|-------------|-------------|------------|------------|-------------|-------------|-------------|-------------|-------------|-------------|-------------|-------------|-------------|------------|------------|-------------|-------------|-------------|-------------|-------------|-------------|-------------|-------------|-------------|------------|------------|-------------|-------------|-------------|-------------|-------------|-------------|-------------|-------------|-------------|------------|------------|-------------|-------------|-------------|-------------|-------------|-------------|-------------|-------------|-------------|------------|------------|-------------|-------------|-------------|-------------|-------------|-------------|-------------|-------------|-------------|------------|------------|-------------|-------------|-------------|-------------|-------------|-------------|-------------|-------------|-------------|------------|------------|-------------|-------------|-------------|-------------|-------------|-------------|-------------|-------------|-------------|------------|------------|-------------|-------------|-------------|-------------|-------------|-------------|-------------|-------------|-------------|------------|------------|-------------|-------------|-------------|-------------|-------------|-------------|-------------|-------------|-------------|------------|------------|-------------|-------------|-------------|-------------|-------------|-------------|-------------|-------------|-------------|------------|------------|-------------|-------------|-------------|-------------|-------------|-------------|-------------|-------------|-------------|------------|------------|-------------|-------------|-------------|-------------|-------------|-------------|-------------|-------------|-------------|------------|------------|
|--------------|---------|------------|------------|------------|-------------|-------------|-------------|-------------|-------------|-------------|-------------|-------------|-------------|-------------|-------------|-------------|------------|------------|-------------|-------------|-------------|-------------|-------------|-------------|-------------|-------------|-------------|------------|------------|-------------|-------------|-------------|-------------|-------------|-------------|-------------|-------------|-------------|------------|------------|-------------|-------------|-------------|-------------|-------------|-------------|-------------|-------------|-------------|------------|------------|-------------|-------------|-------------|-------------|-------------|-------------|-------------|-------------|-------------|------------|------------|-------------|-------------|-------------|-------------|-------------|-------------|-------------|-------------|-------------|------------|------------|-------------|-------------|-------------|-------------|-------------|-------------|-------------|-------------|-------------|------------|------------|-------------|-------------|-------------|-------------|-------------|-------------|-------------|-------------|-------------|------------|------------|-------------|-------------|-------------|-------------|-------------|-------------|-------------|-------------|-------------|------------|------------|-------------|-------------|-------------|-------------|-------------|-------------|-------------|-------------|-------------|------------|------------|-------------|-------------|-------------|-------------|-------------|-------------|-------------|-------------|-------------|------------|------------|-------------|-------------|-------------|-------------|-------------|-------------|-------------|-------------|-------------|------------|------------|-------------|-------------|-------------|-------------|-------------|-------------|-------------|-------------|-------------|------------|------------|-------------|-------------|-------------|-------------|-------------|-------------|-------------|-------------|-------------|------------|------------|-------------|-------------|-------------|-------------|-------------|-------------|-------------|-------------|-------------|------------|------------|-------------|-------------|-------------|-------------|-------------|-------------|-------------|-------------|-------------|------------|------------|-------------|-------------|-------------|-------------|-------------|-------------|-------------|-------------|-------------|------------|------------|-------------|-------------|-------------|-------------|-------------|-------------|-------------|-------------|-------------|------------|------------|-------------|-------------|-------------|-------------|-------------|-------------|-------------|-------------|-------------|------------|------------|-------------|-------------|-------------|-------------|-------------|-------------|-------------|-------------|-------------|------------|------------|-------------|-------------|-------------|-------------|-------------|-------------|-------------|-------------|-------------|------------|------------|-------------|-------------|-------------|-------------|-------------|-------------|-------------|-------------|-------------|------------|------------|-------------|-------------|-------------|-------------|-------------|-------------|-------------|-------------|-------------|------------|------------|-------------|-------------|-------------|-------------|-------------|-------------|-------------|-------------|-------------|------------|------------|-------------|-------------|-------------|-------------|-------------|-------------|-------------|-------------|-------------|------------|------------|-------------|-------------|-------------|-------------|-------------|-------------|-------------|-------------|-------------|------------|------------|-------------|-------------|-------------|-------------|-------------|-------------|-------------|-------------|-------------|------------|------------|-------------|-------------|-------------|-------------|-------------|-------------|-------------|-------------|-------------|------------|------------|-------------|-------------|-------------|-------------|-------------|-------------|-------------|-------------|-------------|------------|------------|-------------|-------------|-------------|-------------|-------------|-------------|-------------|-------------|-------------|------------|------------|-------------|-------------|-------------|-------------|-------------|-------------|-------------|-------------|-------------|------------|------------|-------------|-------------|-------------|-------------|-------------|-------------|-------------|-------------|-------------|------------|------------|-------------|-------------|-------------|-------------|-------------|-------------|-------------|-------------|-------------|------------|------------|-------------|-------------|-------------|-------------|-------------|-------------|-------------|-------------|-------------|------------|------------|-------------|-------------|-------------|-------------|-------------|-------------|-------------|-------------|-------------|------------|------------|-------------|-------------|-------------|-------------|-------------|-------------|-------------|-------------|-------------|------------|------------|-------------|-------------|-------------|-------------|-------------|-------------|-------------|-------------|-------------|------------|------------|-------------|-------------|-------------|-------------|-------------|-------------|-------------|-------------|-------------|------------|------------|-------------|-------------|-------------|-------------|-------------|-------------|-------------|-------------|-------------|------------|------------|-------------|-------------|-------------|-------------|-------------|-------------|-------------|-------------|-------------|------------|------------|-------------|-------------|-------------|-------------|-------------|-------------|-------------|-------------|-------------|------------|------------|-------------|-------------|-------------|-------------|-------------|-------------|-------------|-------------|-------------|------------|------------|-------------|-------------|-------------|-------------|-------------|-------------|-------------|-------------|-------------|------------|------------|-------------|-------------|-------------|-------------|-------------|-------------|-------------|-------------|-------------|------------|------------|-------------|-------------|-------------|-------------|-------------|-------------|-------------|-------------|-------------|------------|------------|-------------|-------------|-------------|-------------|-------------|-------------|-------------|-------------|-------------|------------|------------|-------------|-------------|-------------|-------------|-------------|-------------|-------------|-------------|-------------|------------|------------|-------------|-------------|-------------|-------------|-------------|-------------|-------------|-------------|-------------|------------|------------|-------------|-------------|-------------|-------------|-------------|-------------|-------------|-------------|-------------|------------|------------|-------------|-------------|-------------|-------------|-------------|-------------|-------------|-------------|-------------|------------|------------|-------------|-------------|-------------|-------------|-------------|-------------|-------------|-------------|-------------|------------|------------|-------------|-------------|-------------|-------------|-------------|-------------|-------------|-------------|-------------|------------|------------|-------------|-------------|-------------|-------------|-------------|-------------|-------------|-------------|-------------|------------|------------|-------------|-------------|-------------|-------------|-------------|-------------|-------------|-------------|-------------|------------|------------|-------------|-------------|-------------|-------------|-------------|-------------|-------------|-------------|-------------|------------|------------|-------------|-------------|-------------|-------------|-------------|-------------|-------------|-------------|-------------|------------|------------|





Supplementary Table S1. Overview on the abundance of all relatively quantified 5180 proteins

[illegible]



Supplementary Table S1. Overview on the abundance of all relatively quantified 5180 proteins

[illegible]



Supplementary Table S1. Overview on the abundance of all relatively quantified 5180 proteins

[illegible]

Supplementary Table S1. Overview on the abundance of all relatively quantified 5180 proteins

| MCF-7                                                |         |            |            |            |             |             |             |             |             | MDA-MB-231  |             |             |             |             |             |             |             |             |             |
|------------------------------------------------------|---------|------------|------------|------------|-------------|-------------|-------------|-------------|-------------|-------------|-------------|-------------|-------------|-------------|-------------|-------------|-------------|-------------|-------------|
| Protein name                                         | UniProt | control 01 | control 02 | control 03 | Dai IC20 01 | Dai IC20 02 | Dai IC20 03 | Dai IC20 04 | Dai IC20 05 | Gen IC20 01 | Gen IC20 02 | Gen IC20 03 | Gen IC20 04 | Gen IC20 05 | Gen IC20 06 | Gen IC20 07 | Gen IC20 08 | Gen IC20 09 | Gen IC20 10 |
| 866 Charged multivesicular body protein 1a           | Q9H042  | 12717.31   | 16020.91   | 15024.06   | 10478.43    | 10219.24    | 9847.78     | 12594.96    | 12539.55    | 11273.08    | 11394.38    | 11361.33    | 12104.21    | 15224.04    | 12698.70    | 11235.99    | 9878.92     | 9318.87     | 8968.89     |
| 867 Charged multivesicular body protein 2b           | Q9U349  | 15148.48   | 15129.71   | 13259.27   | 12225.15    | 11389.27    | 12225.15    | 9910.87     | 10917.35    | 10570.36    | 12960.72    | 12960.72    | 12960.72    | 12960.72    | 12960.72    | 12960.72    | 12960.72    | 12960.72    | 12960.72    |
| 868 Charged multivesicular body protein 3            | Q9Y3E7  | 4897.38    | 4721.13    | 4319.93    | 3067.25     | 2751.28     | 2541.95     | 2988.93     | 3210.82     | 2446.13     | 3599.36     | 3430.36     | 3311.38     | 3397.77     | 3175.43     | 2770.24     | 2940.59     | 2592.76     | 2953.56     |
| 869 Charged multivesicular body protein 4            | Q8H43   | 87574.71   | 79601.81   | 70300.98   | 55893.51    | 59996.67    | 59818.60    | 66460.94    | 64660.64    | 61196.41    | 75263.65    | 71629.57    | 72262.85    | 60593.56    | 49160.96    | 61072.51    | 58671.02    | 56729.96    | 66134.47    |
| 870 Charged multivesicular body protein 4b           | Q9H444  | 158278.08  | 160559.20  | 142274.74  | 106947.61   | 105767.53   | 99473.69    | 131213.24   | 128496.81   | 118851.66   | 140526.55   | 133284.86   | 128925.53   | 135870.53   | 130571.13   | 114446.67   | 104017.47   | 99324.30    | 97367.11    |
| 871 Charged multivesicular body protein 4c           | Q9H452  | 47078.21   | 47078.21   | 47078.21   | 47078.21    | 47078.21    | 47078.21    | 47078.21    | 47078.21    | 47078.21    | 47078.21    | 47078.21    | 47078.21    | 47078.21    | 47078.21    | 47078.21    | 47078.21    | 47078.21    | 47078.21    |
| 872 Charged multivesicular body protein 5            | Q9H423  | 68382.03   | 65356.06   | 62401.86   | 44095.81    | 44035.09    | 41738.86    | 41664.24    | 46882.50    | 44093.55    | 50506.54    | 53149.54    | 49057.40    | 50690.55    | 53878.37    | 47528.81    | 43833.14    | 41476.15    | 42018.83    |
| 873 Charged multivesicular body protein 6            | Q9H427  | 1899.77    | 2483.33    | 1870.40    | 1678.90     | 1730.49     | 1455.47     | 1921.92     | 1752.90     | 2021.23     | 2063.94     | 2182.81     | 1889.29     | 2180.75     | 2084.21     | 1718.11     | 1295.17     | 1371.63     | 1303.11     |
| 874 Chitinase domain-containing protein              | Q9H509  | 1603.75    | 2057.60    | 1547.49    | 1911.85     | 1678.28     | 1675.73     | 1629.53     | 1650.99     | 1421.64     | 1000.63     | 2072.70     | 1689.29     | 2505.37     | 1932.87     | 1784.61     | 2059.81     | 1994.77     | 1842.27     |
| 875 Chloride channel CLIC4 protein                   | Q9H566  | 1205.33    | 1205.33    | 1205.33    | 1205.33     | 1205.33     | 1205.33     | 1205.33     | 1205.33     | 1205.33     | 1205.33     | 1205.33     | 1205.33     | 1205.33     | 1205.33     | 1205.33     | 1205.33     | 1205.33     | 1205.33     |
| 876 Chloride intracellular channel protein 1         | Q9H529  | 590720.20  | 559701.68  | 520928.91  | 36788.14    | 348051.69   | 341411.02   | 418878.97   | 408875.79   | 393296.74   | 452388.26   | 436631.26   | 416111.71   | 476364.02   | 452166.90   | 403936.94   | 348861.29   | 324186.06   | 331727.51   |
| 877 Chloride intracellular channel protein 2         | Q9H529  | 590720.20  | 559701.68  | 520928.91  | 36788.14    | 348051.69   | 341411.02   | 418878.97   | 408875.79   | 393296.74   | 452388.26   | 436631.26   | 416111.71   | 476364.02   | 452166.90   | 403936.94   | 348861.29   | 324186.06   | 331727.51   |
| 878 Chloride intracellular channel protein 3         | Q9H529  | 590720.20  | 559701.68  | 520928.91  | 36788.14    | 348051.69   | 341411.02   | 418878.97   | 408875.79   | 393296.74   | 452388.26   | 436631.26   | 416111.71   | 476364.02   | 452166.90   | 403936.94   | 348861.29   | 324186.06   | 331727.51   |
| 879 Chloride intracellular channel protein 4         | Q9H529  | 590720.20  | 559701.68  | 520928.91  | 36788.14    | 348051.69   | 341411.02   | 418878.97   | 408875.79   | 393296.74   | 452388.26   | 436631.26   | 416111.71   | 476364.02   | 452166.90   | 403936.94   | 348861.29   | 324186.06   | 331727.51   |
| 880 Chloride intracellular channel protein 5         | Q9H529  | 590720.20  | 559701.68  | 520928.91  | 36788.14    | 348051.69   | 341411.02   | 418878.97   | 408875.79   | 393296.74   | 452388.26   | 436631.26   | 416111.71   | 476364.02   | 452166.90   | 403936.94   | 348861.29   | 324186.06   | 331727.51   |
| 881 Choline O-acetyltransferase                      | P28329  | 0.14       | 2.53       | 0.81       | 1.07        | 2.77        | 0.68        | 0.96        | 0.36        | 0.63        | 0.35        | 0.75        | 0.38        | 2.13        | 0.97        | 0.60        | 4.64        | 1.07        | 0.47        |
| 882 Choline transporter-like protein 1               | Q8HWW5  | 0.14       | 2.53       | 0.81       | 1.07        | 2.77        | 0.68        | 0.96        | 0.36        | 0.63        | 0.35        | 0.75        | 0.38        | 2.13        | 0.97        | 0.60        | 4.64        | 1.07        | 0.47        |
| 883 Choline-phosphate cytidylyltransferase A         | Q9H583  | 81935.09   | 77782.45   | 71524.40   | 52480.19    | 64048.07    | 42969.23    | 56338.87    | 53418.95    | 52570.35    | 65926.25    | 63900.35    | 56415.38    | 61844.73    | 59811.45    | 42831.45    | 51123.09    | 49922.32    | 55745.45    |
| 884 Choline-phosphate cytidylyltransferase B         | Q9Y3K3  | 270683.38  | 269596.82  | 247599.94  | 177032.14   | 171300.87   | 155113.98   | 187408.49   | 180122.13   | 168872.33   | 219156.74   | 215375.70   | 19928.89    | 206636.93   | 201118.63   | 167500.82   | 173539.65   | 163341.71   | 152020.14   |
| 885 Chondrolectin                                    | Q9H9P2  | 35697.72   | 30694.02   | 28177.26   | 24765.90    | 23951.37    | 22268.13    | 24244.03    | 22261.24    | 22780.13    | 24927.73    | 21183.42    | 22762.19    | 22677.47    | 21183.42    | 22672.19    | 22672.19    | 22672.19    | 22672.19    |
| 886 Chromatin accessibility complex protein 1        | Q9H9M0  | 0.14       | 2.53       | 0.81       | 1.07        | 2.77        | 0.68        | 0.96        | 0.36        | 0.63        | 0.35        | 0.75        | 0.38        | 2.13        | 0.97        | 0.60        | 4.64        | 1.07        | 0.47        |
| 887 Chromatin complex subunit BAP15                  | Q8H0M2  | 0.14       | 2.53       | 0.81       | 1.07        | 2.77        | 0.68        | 0.96        | 0.36        | 0.63        | 0.35        | 0.75        | 0.38        | 2.13        | 0.97        | 0.60        | 4.64        | 1.07        | 0.47        |
| 888 Chromatin target of PRMT1 protein                | Q9Y3Y2  | 0.14       | 2.53       | 0.81       | 1.07        | 2.77        | 0.68        | 0.96        | 0.36        | 0.63        | 0.35        | 0.75        | 0.38        | 2.13        | 0.97        | 0.60        | 4.64        | 1.07        | 0.47        |
| 889 Chromobox protein homolog 1                      | R83916  | 10711.62   | 10455.07   | 10313.26   | 6879.24     | 6808.66     | 6116.68     | 7943.04     | 7486.32     | 7086.61     | 12008.49    | 11064.54    | 9895.01     | 6831.67     | 7300.40     | 4779.65     | 7923.98     | 8106.79     | 8102.64     |
| 890 Chromatin protein homolog 3                      | G11385  | 148771.91  | 140884.90  | 131018.30  | 243144.96   | 236869.43   | 232597.81   | 271501.43   | 258491.90   | 271895.00   | 247785.80   | 247785.80   | 247785.80   | 247785.80   | 247785.80   | 247785.80   | 247785.80   | 247785.80   | 247785.80   |
| 891 Chromatin protein homolog 5                      | P45973  | 51211.88   | 49500.95   | 46005.31   | 33429.25    | 33737.36    | 28705.22    | 40285.37    | 37439.66    | 36255.15    | 36363.29    | 34808.06    | 32682.71    | 39203.31    | 35544.16    | 27600.43    | 32584.83    | 33113.81    | 30969.40    |
| 892 Chromodomain-helicase-DNA-binding protein 1      | O14646  | 7291.00    | 7641.92    | 6175.52    | 5083.47     | 4947.88     | 4872.31     | 4915.06     | 5153.78     | 4711.08     | 7143.70     | 6423.18     | 6519.24     | 5415.24     | 5847.38     | 5297.84     | 5132.04     | 5647.38     | 6514.60     |
| 893 Chromodomain-helicase-DNA-binding protein 1-like | Q8H0W1  | 68990.06   | 64172.71   | 60511.03   | 44029.31    | 42895.58    | 41936.19    | 48876.04    | 48139.28    | 45430.38    | 56458.02    | 56007.97    | 51592.17    | 55328.72    | 48164.70    | 28965.69    | 33965.86    | 44044.69    | 44040.54    |
| 894 Chromodomain-helicase-DNA-binding protein 3      | O12873  | 0.14       | 2.53       | 0.81       | 1.07        | 2.77        | 0.68        | 0.96        | 0.36        | 0.63        | 0.35        | 0.75        | 0.38        | 2.13        | 0.97        | 0.60        | 4.64        | 1.07        | 0.47        |
| 895 Chromodomain-helicase-DNA-binding protein 4      | O14638  | 69752.35   | 70287.68   | 64795.96   | 45087.99    | 44053.17    | 43040.61    | 54938.46    | 54207.48    | 54302.84    | 52969.39    | 58020.12    | 54263.15    | 46745.25    | 43751.04    | 43168.58    | 43570.52    | 51052.27    | 48725.41    |
| 896 Chromosome-associated protein 68A                | Q9Y329  | 0.14       | 2.53       | 0.81       | 1.07        | 2.77        | 0.68        | 0.96        | 0.36        | 0.63        | 0.35        | 0.75        | 0.38        | 2.13        | 0.97        | 0.60        | 4.64        | 1.07        | 0.47        |
| 897 Chromosome-associated kinesin KIF48              | Q2VQV3  | 46074.72   | 42562.24   | 39251.68   | 34191.32    | 33588.07    | 31852.20    | 38014.46    | 36884.15    | 35051.55    | 38577.12    | 36598.01    | 39541.20    | 39541.20    | 39541.20    | 39541.20    | 39541.20    | 39541.20    | 39541.20    |
| 898 Chymotrypsin-C                                   | Q9H9B5  | 0.14       | 2.53       | 0.81       | 1.07        | 2.77        | 0.68        | 0.96        | 0.36        | 0.63        | 0.35        | 0.75        | 0.38        | 2.13        | 0.97        | 0.60        | 4.64        | 1.07        | 0.47        |
| 899 Cilia- and flagella-associated protein 15a       | Q9H9B5  | 0.14       | 2.53       | 0.81       | 1.07        | 2.77        | 0.68        | 0.96        | 0.36        | 0.63        | 0.35        | 0.75        | 0.38        | 2.13        | 0.97        | 0.60        | 4.64        | 1.07        | 0.47        |
| 900 Cilia- and flagella-associated protein 16        | Q9H9B5  | 0.14       | 2.53       | 0.81       | 1.07        | 2.77        | 0.68        | 0.96        | 0.36        | 0.63        | 0.35        | 0.75        | 0.38        | 2.13        | 0.97        | 0.60        | 4.64        | 1.07        | 0.47        |
| 901 Cilia- and flagella-associated protein 20        | Q9H9B5  | 0.14       | 2.53       | 0.81       | 1.07        | 2.77        | 0.68        | 0.96        | 0.36        | 0.63        | 0.35        | 0.75        | 0.38        | 2.13        | 0.97        | 0.60        | 4.64        | 1.07        | 0.47        |
| 902 Cilia- and flagella-associated protein 29B       | P57076  | 12179.44   | 10245.63   | 7732.68    | 6491.69     | 6197.58     | 4701.36     | 7165.80     | 6913.09     | 6756.28     | 10009.07    | 9604.95     | 7180.69     | 8726.22     | 7245.29     | 4427.58     | 7176.57     | 6155.94     | 4742.58     |
| 903 Cilia- and flagella-associated protein 43        | Q8H0M0  | 0.14       | 2.53       | 0.81       | 1.07        | 2.77        | 0.68        | 0.96        | 0.36        | 0.63        | 0.35        | 0.75        | 0.38        | 2.13        | 0.97        | 0.60        | 4.64        | 1.07        | 0.47        |
| 904 Cilia- and flagella-associated protein 54        | Q9H9B5  | 0.14       | 2.53       | 0.81       | 1.07        | 2.77        | 0.68        | 0.96        | 0.36        | 0.63        | 0.35        | 0.75        | 0.38        | 2.13        | 0.97        | 0.60        | 4.64        | 1.07        | 0.47        |
| 905 Cilia- and flagella-associated protein 58        | Q9H9B5  | 0.14       | 2.53       | 0.81       | 1.07        | 2.77        | 0.68        | 0.96        | 0.36        | 0.63        | 0.35        | 0.75        | 0.38        | 2.13        | 0.97        | 0.60        | 4.64        | 1.07        | 0.47        |
| 906 Cilia- and flagella-associated protein 69        | Q9H9B5  | 0.14       | 2.53       | 0.81       | 1.07        | 2.77        | 0.68        | 0.96        | 0.36        | 0.63        | 0.35        | 0.75        | 0.38        | 2.13        | 0.97        | 0.60        | 4.64        | 1.07        | 0.47        |
| 907 Cilia- and flagella-associated protein 74        | Q9H9B5  | 0.14       | 2.53       | 0.81       | 1.07        | 2.77        | 0.68        | 0.96        | 0.36        | 0.63        | 0.35        | 0.75        | 0.38        | 2.13        | 0.97        | 0.60        | 4.64        | 1.07        | 0.47        |
| 908 Cilia- and flagella-associated protein 91        | Q9H9B5  | 0.14       | 2.53       | 0.81       | 1.07        | 2.77        | 0.68        | 0.96        | 0.36        | 0.63        | 0.35        | 0.75        | 0.38        | 2.13        | 0.97        | 0.60        | 4.64        | 1.07        | 0.47        |
| 909 Cilia- and flagella-associated protein 97        | Q9H9B5  | 0.14       | 2.53       | 0.81       | 1.07        | 2.77        | 0.68        | 0.96        | 0.36        | 0.63        | 0.35        | 0.75        | 0.38        | 2.13        | 0.97        | 0.60        | 4.64        | 1.07        | 0.47        |
| 910 Cilia- and flagella-associated protein 97        | Q9H9B5  | 0.14       | 2.53       | 0.81       | 1.07        | 2.77        | 0.68        | 0.96        | 0.36        | 0.63        | 0.35        | 0.75        | 0.38        | 2.13        | 0.97        | 0.60        | 4.64        | 1.07        | 0.47        |
| 911 Cingulin                                         | Q9Y3M7  | 136076.41  | 134512.02  | 124855.69  | 95966.75    | 94054.14    | 88298.22    | 106848.26   | 105128.08   | 101070.46   | 134511.13   | 115021.58   | 108414.04   | 111394.75   | 107906.37   | 87507.35    | 96970.57    | 90884.54    | 89539.89    |
| 912 Cytoskeleton-mitochondrial                       | Q9Y3M7  | 136076.41  | 134512.02  | 124855.69  | 95966.75    | 94054.14    | 88298.22    | 106848.26   | 105128.08   | 101070.46   | 134511.13   | 115021.58   | 108414.04   | 111394.75   | 107906.37   | 87507.35    | 96970.57    | 90884.54    | 89539.89    |
| 913 Cytoskeleton-mitochondrial                       | Q9Y3M7  | 136076.41  | 134512.02  | 124855.69  | 95966.75    | 94054.14    | 88298.22    | 106848.26   | 105128.08   | 101070.46   | 134511.13   | 115021.58   | 108414.04   | 111394.75   | 107906.37   | 87507.35    | 96970.57    | 90884.54    | 89539.89    |
| 914 Cytoskeleton-mitochondrial                       | Q9Y3M7  | 136076.41  | 134512.02  | 124855.69  | 95966.75    | 94054.14    | 88298.22    | 106848.26   | 105128.08   | 101070.46   | 134511.13   | 115021.58   | 108414.04   | 111394.75   | 107906.37   | 87507.35    | 96970.57    | 90884.54    | 89539.89    |
| 915 Cytoskeleton-mitochondrial                       | Q9Y3M7  | 136076.41  | 134512.02  | 124855.69  | 95966.75    | 94054.14    | 88298.22    | 106848.26   | 105128.08   | 101070.46   | 134511.13   | 11          |             |             |             |             |             |             |             |



Supplementary Table S1. Overview on the abundance of all relatively quantified 5180 proteins

|  | UniProt | control 0 | control 1 | control 2 | DC10 01 | DC10 02 | DC10 03 | DC10 04 | DC10 05 | DC10 06 | DC10 07 | DC10 08 | DC10 09 | DC10 10 | DC10 11 | DC10 12 | DC10 13 | DC10 14 | DC10 15 | DC10 16 | DC10 17 | DC10 18 | DC10 19 | DC10 20 | DC10 21 | DC10 22 | DC10 23 | DC10 24 | DC10 25 | DC10 26 | DC10 27 | DC10 28 | DC10 29 | DC10 30 | DC10 31 | DC10 32 | DC10 33 | DC10 34 | DC10 35 | DC10 36 | DC10 37 | DC10 38 | DC10 39 | DC10 40 | DC10 41 | DC10 42 | DC10 43 | DC10 44 | DC10 45 | DC10 46 | DC10 47 | DC10 48 | DC10 49 | DC10 50 | DC10 51 | DC10 52 | DC10 53 | DC10 54 | DC10 55 | DC10 56 | DC10 57 | DC10 58 | DC10 59 | DC10 60 | DC10 61 | DC10 62 | DC10 63 | DC10 64 | DC10 65 | DC10 66 | DC10 67 | DC10 68 | DC10 69 | DC10 70 | DC10 71 | DC10 72 | DC10 73 | DC10 74 | DC10 75 | DC10 76 | DC10 77 | DC10 78 | DC10 79 | DC10 80 | DC10 81 | DC10 82 | DC10 83 | DC10 84 | DC10 85 | DC10 86 | DC10 87 | DC10 88 | DC10 89 | DC10 90 | DC10 91 | DC10 92 | DC10 93 | DC10 94 | DC10 95 | DC10 96 | DC10 97 | DC10 98 | DC10 99 | DC10 100 | DC10 101 | DC10 102 | DC10 103 | DC10 104 | DC10 105 | DC10 106 | DC10 107 | DC10 108 | DC10 109 | DC10 110 | DC10 111 | DC10 112 | DC10 113 | DC10 114 | DC10 115 | DC10 116 | DC10 117 | DC10 118 | DC10 119 | DC10 120 | DC10 121 | DC10 122 | DC10 123 | DC10 124 | DC10 125 | DC10 126 | DC10 127 | DC10 128 | DC10 129 | DC10 130 | DC10 131 | DC10 132 | DC10 133 | DC10 134 | DC10 135 | DC10 136 | DC10 137 | DC10 138 | DC10 139 | DC10 140 | DC10 141 | DC10 142 | DC10 143 | DC10 144 | DC10 145 | DC10 146 | DC10 147 | DC10 148 | DC10 149 | DC10 150 | DC10 151 | DC10 152 | DC10 153 | DC10 154 | DC10 155 | DC10 156 | DC10 157 | DC10 158 | DC10 159 | DC10 160 | DC10 161 | DC10 162 | DC10 163 | DC10 164 | DC10 165 | DC10 166 | DC10 167 | DC10 168 | DC10 169 | DC10 170 | DC10 171 | DC10 172 | DC10 173 | DC10 174 | DC10 175 | DC10 176 | DC10 177 | DC10 178 | DC10 179 | DC10 180 | DC10 181 | DC10 182 | DC10 183 | DC10 184 | DC10 185 | DC10 186 | DC10 187 | DC10 188 | DC10 189 | DC10 190 | DC10 191 | DC10 192 | DC10 193 | DC10 194 | DC10 195 | DC10 196 | DC10 197 | DC10 198 | DC10 199 | DC10 200 | DC10 201 | DC10 202 | DC10 203 | DC10 204 | DC10 205 | DC10 206 | DC10 207 | DC10 208 | DC10 209 | DC10 210 | DC10 211 | DC10 212 | DC10 213 | DC10 214 | DC10 215 | DC10 216 | DC10 217 | DC10 218 | DC10 219 | DC10 220 | DC10 221 | DC10 222 | DC10 223 | DC10 224 | DC10 225 | DC10 226 | DC10 227 | DC10 228 | DC10 229 | DC10 230 | DC10 231 | DC10 232 | DC10 233 | DC10 234 | DC10 235 | DC10 236 | DC10 237 | DC10 238 | DC10 239 | DC10 240 | DC10 241 | DC10 242 | DC10 243 | DC10 244 | DC10 245 | DC10 246 | DC10 247 | DC10 248 | DC10 249 | DC10 250 | DC10 251 | DC10 252 | DC10 253 | DC10 254 | DC10 255 | DC10 256 | DC10 257 | DC10 258 | DC10 259 | DC10 260 | DC10 261 | DC10 262 | DC10 263 | DC10 264 | DC10 265 | DC10 266 | DC10 267 | DC10 268 | DC10 269 | DC10 270 | DC10 271 | DC10 272 | DC10 273 | DC10 274 | DC10 275 | DC10 276 | DC10 277 | DC10 278 | DC10 279 | DC10 280 | DC10 281 | DC10 282 | DC10 283 | DC10 284 | DC10 285 | DC10 286 | DC10 287 | DC10 288 | DC10 289 | DC10 290 | DC10 291 | DC10 292 | DC10 293 | DC10 294 | DC10 295 | DC10 296 | DC10 297 | DC10 298 | DC10 299 | DC10 300 | DC10 301 | DC10 302 | DC10 303 | DC10 304 | DC10 305 | DC10 306 | DC10 307 | DC10 308 | DC10 309 | DC10 310 | DC10 311 | DC10 312 | DC10 313 | DC10 314 | DC10 315 | DC10 316 | DC10 317 | DC10 318 | DC10 319 | DC10 320 | DC10 321 | DC10 322 | DC10 323 | DC10 324 | DC10 325 | DC10 326 | DC10 327 | DC10 328 | DC10 329 | DC10 330 | DC10 331 | DC10 332 | DC10 333 | DC10 334 | DC10 335 | DC10 336 | DC10 337 | DC10 338 | DC10 339 | DC10 340 | DC10 341 | DC10 342 | DC10 343 | DC10 344 | DC10 345 | DC10 346 | DC1 |
|--|---------|-----------|-----------|-----------|---------|---------|---------|---------|---------|---------|---------|---------|---------|---------|---------|---------|---------|---------|---------|---------|---------|---------|---------|---------|---------|---------|---------|---------|---------|---------|---------|---------|---------|---------|---------|---------|---------|---------|---------|---------|---------|---------|---------|---------|---------|---------|---------|---------|---------|---------|---------|---------|---------|---------|---------|---------|---------|---------|---------|---------|---------|---------|---------|---------|---------|---------|---------|---------|---------|---------|---------|---------|---------|---------|---------|---------|---------|---------|---------|---------|---------|---------|---------|---------|---------|---------|---------|---------|---------|---------|---------|---------|---------|---------|---------|---------|---------|---------|---------|---------|---------|---------|---------|----------|----------|----------|----------|----------|----------|----------|----------|----------|----------|----------|----------|----------|----------|----------|----------|----------|----------|----------|----------|----------|----------|----------|----------|----------|----------|----------|----------|----------|----------|----------|----------|----------|----------|----------|----------|----------|----------|----------|----------|----------|----------|----------|----------|----------|----------|----------|----------|----------|----------|----------|----------|----------|----------|----------|----------|----------|----------|----------|----------|----------|----------|----------|----------|----------|----------|----------|----------|----------|----------|----------|----------|----------|----------|----------|----------|----------|----------|----------|----------|----------|----------|----------|----------|----------|----------|----------|----------|----------|----------|----------|----------|----------|----------|----------|----------|----------|----------|----------|----------|----------|----------|----------|----------|----------|----------|----------|----------|----------|----------|----------|----------|----------|----------|----------|----------|----------|----------|----------|----------|----------|----------|----------|----------|----------|----------|----------|----------|----------|----------|----------|----------|----------|----------|----------|----------|----------|----------|----------|----------|----------|----------|----------|----------|----------|----------|----------|----------|----------|----------|----------|----------|----------|----------|----------|----------|----------|----------|----------|----------|----------|----------|----------|----------|----------|----------|----------|----------|----------|----------|----------|----------|----------|----------|----------|----------|----------|----------|----------|----------|----------|----------|----------|----------|----------|----------|----------|----------|----------|----------|----------|----------|----------|----------|----------|----------|----------|----------|----------|----------|----------|----------|----------|----------|----------|----------|----------|----------|----------|----------|----------|----------|----------|----------|----------|----------|----------|----------|----------|----------|----------|----------|----------|----------|----------|----------|----------|----------|----------|----------|----------|----------|----------|----------|----------|----------|----------|----------|----------|----------|----------|----------|----------|----------|----------|----------|----------|-----|
|--|---------|-----------|-----------|-----------|---------|---------|---------|---------|---------|---------|---------|---------|---------|---------|---------|---------|---------|---------|---------|---------|---------|---------|---------|---------|---------|---------|---------|---------|---------|---------|---------|---------|---------|---------|---------|---------|---------|---------|---------|---------|---------|---------|---------|---------|---------|---------|---------|---------|---------|---------|---------|---------|---------|---------|---------|---------|---------|---------|---------|---------|---------|---------|---------|---------|---------|---------|---------|---------|---------|---------|---------|---------|---------|---------|---------|---------|---------|---------|---------|---------|---------|---------|---------|---------|---------|---------|---------|---------|---------|---------|---------|---------|---------|---------|---------|---------|---------|---------|---------|---------|---------|---------|---------|----------|----------|----------|----------|----------|----------|----------|----------|----------|----------|----------|----------|----------|----------|----------|----------|----------|----------|----------|----------|----------|----------|----------|----------|----------|----------|----------|----------|----------|----------|----------|----------|----------|----------|----------|----------|----------|----------|----------|----------|----------|----------|----------|----------|----------|----------|----------|----------|----------|----------|----------|----------|----------|----------|----------|----------|----------|----------|----------|----------|----------|----------|----------|----------|----------|----------|----------|----------|----------|----------|----------|----------|----------|----------|----------|----------|----------|----------|----------|----------|----------|----------|----------|----------|----------|----------|----------|----------|----------|----------|----------|----------|----------|----------|----------|----------|----------|----------|----------|----------|----------|----------|----------|----------|----------|----------|----------|----------|----------|----------|----------|----------|----------|----------|----------|----------|----------|----------|----------|----------|----------|----------|----------|----------|----------|----------|----------|----------|----------|----------|----------|----------|----------|----------|----------|----------|----------|----------|----------|----------|----------|----------|----------|----------|----------|----------|----------|----------|----------|----------|----------|----------|----------|----------|----------|----------|----------|----------|----------|----------|----------|----------|----------|----------|----------|----------|----------|----------|----------|----------|----------|----------|----------|----------|----------|----------|----------|----------|----------|----------|----------|----------|----------|----------|----------|----------|----------|----------|----------|----------|----------|----------|----------|----------|----------|----------|----------|----------|----------|----------|----------|----------|----------|----------|----------|----------|----------|----------|----------|----------|----------|----------|----------|----------|----------|----------|----------|----------|----------|----------|----------|----------|----------|----------|----------|----------|----------|----------|----------|----------|----------|----------|----------|----------|----------|----------|----------|----------|----------|----------|----------|----------|----------|----------|----------|----------|----------|-----|

Supplementary Table S1. Overview on the abundance of all relatively quantified 5180 proteins

|  |         | MCF-7   |         |         |         |         |         |         |         |         |         | MDA-MB-231 |         |         |         |         |         |         |         |         |         |         |         |         |         |         |         |         |         |         |         |         |         |         |         |         |         |         |         |         |         |         |         |         |         |         |         |         |         |         |         |         |         |         |         |         |         |         |         |         |         |         |         |         |         |         |         |         |         |         |         |         |         |         |         |         |         |         |         |         |         |         |         |         |         |         |         |         |         |         |         |         |         |         |         |         |         |         |         |         |         |         |         |         |          |          |          |          |          |          |          |          |          |          |          |          |          |          |          |          |          |          |          |          |          |          |          |          |          |          |          |          |          |          |          |          |          |          |          |          |          |          |          |          |          |          |          |          |          |          |          |          |          |          |          |          |          |          |          |          |          |          |          |          |          |          |          |          |          |          |          |          |          |          |          |          |          |          |          |          |          |          |          |          |          |          |          |          |          |          |          |          |          |          |          |          |          |          |          |          |          |          |          |          |          |          |          |          |          |          |          |          |          |          |          |          |          |          |          |          |          |          |          |          |          |          |          |          |          |          |          |          |          |          |          |          |          |          |          |          |          |          |          |          |          |          |          |          |          |          |          |          |          |          |          |          |          |          |          |          |          |          |          |          |          |          |          |          |          |          |          |          |          |          |          |          |          |          |          |          |          |          |          |          |          |          |          |          |          |          |          |          |          |          |          |          |          |          |          |          |          |          |          |          |          |          |          |          |          |          |          |          |          |          |          |          |          |          |          |          |          |          |          |          |          |          |          |          |          |          |          |          |          |          |          |          |          |          |          |          |          |          |          |          |          |          |          |          |
|--|---------|---------|---------|---------|---------|---------|---------|---------|---------|---------|---------|------------|---------|---------|---------|---------|---------|---------|---------|---------|---------|---------|---------|---------|---------|---------|---------|---------|---------|---------|---------|---------|---------|---------|---------|---------|---------|---------|---------|---------|---------|---------|---------|---------|---------|---------|---------|---------|---------|---------|---------|---------|---------|---------|---------|---------|---------|---------|---------|---------|---------|---------|---------|---------|---------|---------|---------|---------|---------|---------|---------|---------|---------|---------|---------|---------|---------|---------|---------|---------|---------|---------|---------|---------|---------|---------|---------|---------|---------|---------|---------|---------|---------|---------|---------|---------|---------|---------|---------|---------|---------|---------|---------|---------|----------|----------|----------|----------|----------|----------|----------|----------|----------|----------|----------|----------|----------|----------|----------|----------|----------|----------|----------|----------|----------|----------|----------|----------|----------|----------|----------|----------|----------|----------|----------|----------|----------|----------|----------|----------|----------|----------|----------|----------|----------|----------|----------|----------|----------|----------|----------|----------|----------|----------|----------|----------|----------|----------|----------|----------|----------|----------|----------|----------|----------|----------|----------|----------|----------|----------|----------|----------|----------|----------|----------|----------|----------|----------|----------|----------|----------|----------|----------|----------|----------|----------|----------|----------|----------|----------|----------|----------|----------|----------|----------|----------|----------|----------|----------|----------|----------|----------|----------|----------|----------|----------|----------|----------|----------|----------|----------|----------|----------|----------|----------|----------|----------|----------|----------|----------|----------|----------|----------|----------|----------|----------|----------|----------|----------|----------|----------|----------|----------|----------|----------|----------|----------|----------|----------|----------|----------|----------|----------|----------|----------|----------|----------|----------|----------|----------|----------|----------|----------|----------|----------|----------|----------|----------|----------|----------|----------|----------|----------|----------|----------|----------|----------|----------|----------|----------|----------|----------|----------|----------|----------|----------|----------|----------|----------|----------|----------|----------|----------|----------|----------|----------|----------|----------|----------|----------|----------|----------|----------|----------|----------|----------|----------|----------|----------|----------|----------|----------|----------|----------|----------|----------|----------|----------|----------|----------|----------|----------|----------|----------|----------|----------|----------|----------|----------|----------|----------|----------|----------|----------|----------|----------|----------|----------|----------|----------|----------|----------|----------|----------|----------|----------|----------|----------|----------|----------|----------|----------|----------|----------|----------|----------|----------|----------|
|  | UniProt | control | control | control | control | IC20 01 | IC20 02 | IC20 03 | IC20 04 | IC20 05 | IC20 06 | IC20 07    | IC20 08 | IC20 09 | IC20 10 | IC20 11 | IC20 12 | IC20 13 | IC20 14 | IC20 15 | IC20 16 | IC20 17 | IC20 18 | IC20 19 | IC20 20 | IC20 21 | IC20 22 | IC20 23 | IC20 24 | IC20 25 | IC20 26 | IC20 27 | IC20 28 | IC20 29 | IC20 30 | IC20 31 | IC20 32 | IC20 33 | IC20 34 | IC20 35 | IC20 36 | IC20 37 | IC20 38 | IC20 39 | IC20 40 | IC20 41 | IC20 42 | IC20 43 | IC20 44 | IC20 45 | IC20 46 | IC20 47 | IC20 48 | IC20 49 | IC20 50 | IC20 51 | IC20 52 | IC20 53 | IC20 54 | IC20 55 | IC20 56 | IC20 57 | IC20 58 | IC20 59 | IC20 60 | IC20 61 | IC20 62 | IC20 63 | IC20 64 | IC20 65 | IC20 66 | IC20 67 | IC20 68 | IC20 69 | IC20 70 | IC20 71 | IC20 72 | IC20 73 | IC20 74 | IC20 75 | IC20 76 | IC20 77 | IC20 78 | IC20 79 | IC20 80 | IC20 81 | IC20 82 | IC20 83 | IC20 84 | IC20 85 | IC20 86 | IC20 87 | IC20 88 | IC20 89 | IC20 90 | IC20 91 | IC20 92 | IC20 93 | IC20 94 | IC20 95 | IC20 96 | IC20 97 | IC20 98 | IC20 99 | IC20 100 | IC20 101 | IC20 102 | IC20 103 | IC20 104 | IC20 105 | IC20 106 | IC20 107 | IC20 108 | IC20 109 | IC20 110 | IC20 111 | IC20 112 | IC20 113 | IC20 114 | IC20 115 | IC20 116 | IC20 117 | IC20 118 | IC20 119 | IC20 120 | IC20 121 | IC20 122 | IC20 123 | IC20 124 | IC20 125 | IC20 126 | IC20 127 | IC20 128 | IC20 129 | IC20 130 | IC20 131 | IC20 132 | IC20 133 | IC20 134 | IC20 135 | IC20 136 | IC20 137 | IC20 138 | IC20 139 | IC20 140 | IC20 141 | IC20 142 | IC20 143 | IC20 144 | IC20 145 | IC20 146 | IC20 147 | IC20 148 | IC20 149 | IC20 150 | IC20 151 | IC20 152 | IC20 153 | IC20 154 | IC20 155 | IC20 156 | IC20 157 | IC20 158 | IC20 159 | IC20 160 | IC20 161 | IC20 162 | IC20 163 | IC20 164 | IC20 165 | IC20 166 | IC20 167 | IC20 168 | IC20 169 | IC20 170 | IC20 171 | IC20 172 | IC20 173 | IC20 174 | IC20 175 | IC20 176 | IC20 177 | IC20 178 | IC20 179 | IC20 180 | IC20 181 | IC20 182 | IC20 183 | IC20 184 | IC20 185 | IC20 186 | IC20 187 | IC20 188 | IC20 189 | IC20 190 | IC20 191 | IC20 192 | IC20 193 | IC20 194 | IC20 195 | IC20 196 | IC20 197 | IC20 198 | IC20 199 | IC20 200 | IC20 201 | IC20 202 | IC20 203 | IC20 204 | IC20 205 | IC20 206 | IC20 207 | IC20 208 | IC20 209 | IC20 210 | IC20 211 | IC20 212 | IC20 213 | IC20 214 | IC20 215 | IC20 216 | IC20 217 | IC20 218 | IC20 219 | IC20 220 | IC20 221 | IC20 222 | IC20 223 | IC20 224 | IC20 225 | IC20 226 | IC20 227 | IC20 228 | IC20 229 | IC20 230 | IC20 231 | IC20 232 | IC20 233 | IC20 234 | IC20 235 | IC20 236 | IC20 237 | IC20 238 | IC20 239 | IC20 240 | IC20 241 | IC20 242 | IC20 243 | IC20 244 | IC20 245 | IC20 246 | IC20 247 | IC20 248 | IC20 249 | IC20 250 | IC20 251 | IC20 252 | IC20 253 | IC20 254 | IC20 255 | IC20 256 | IC20 257 | IC20 258 | IC20 259 | IC20 260 | IC20 261 | IC20 262 | IC20 263 | IC20 264 | IC20 265 | IC20 266 | IC20 267 | IC20 268 | IC20 269 | IC20 270 | IC20 271 | IC20 272 | IC20 273 | IC20 274 | IC20 275 | IC20 276 | IC20 277 | IC20 278 | IC20 279 | IC20 280 | IC20 281 | IC20 282 | IC20 283 | IC20 284 | IC20 285 | IC20 286 | IC20 287 | IC20 288 | IC20 289 | IC20 290 | IC20 291 | IC20 292 | IC20 293 | IC20 294 | IC20 295 | IC20 296 | IC20 297 | IC20 298 | IC20 299 | IC20 300 | IC20 301 | IC20 302 | IC20 303 | IC20 304 | IC20 305 | IC20 306 | IC20 307 | IC20 308 | IC20 309 | IC20 310 | IC20 311 | IC20 312 | IC20 313 | IC20 314 | IC20 315 | IC20 316 | IC20 317 | IC20 318 | IC20 319 | IC20 320 | IC20 321 | IC20 322 | IC20 323 | IC20 324 | IC20 325 | IC20 326 | IC20 327 | IC20 328 | IC20 329 | IC20 330 | IC20 331 | IC20 332 | IC20 333 | IC20 334 | IC20 335 | IC20 336 | IC20 337 | IC20 338 | IC20 339 | IC20 340 | IC20 341 | IC20 342 | IC20 343 |

Supplementary Table S1. Overview on the abundance of all relatively quantified 5180 proteins

[illegible]

Supplementary Table S1. Overview on the abundance of all relatively quantified 5180 proteins



Supplementary Table S1. Overview on the abundance of all relatively enriched 1180 proteins

| Protein name |  | UniProt |  | control |  | control |  | Dai IC20 01 |  | Dai IC20 02 |  | Dai IC20 03 |  | Dai IC20 04 |  | Dai IC20 05 |  | Dai IC20 06 |  | Dai IC20 07 |  | Dai IC20 08 |  | Dai IC20 09 |  | Dai IC20 10 |  | Dai IC20 11 |  | Dai IC20 12 |  | Dai IC20 13 |  | Dai IC20 14 |  | Dai IC20 15 |  | Dai IC20 16 |  | Dai IC20 17 |  | Dai IC20 18 |  | Dai IC20 19 |  | Dai IC20 20 |  | Dai IC20 21 |  | Dai IC20 22 |  | Dai IC20 23 |  | Dai IC20 24 |  | Dai IC20 25 |  | Dai IC20 26 |  | Dai IC20 27 |  | Dai IC20 28 |  | Dai IC20 29 |  | Dai IC20 30 |  | Dai IC20 31 |  | Dai IC20 32 |  | Dai IC20 33 |  | Dai IC20 34 |  | Dai IC20 35 |  | Dai IC20 36 |  | Dai IC20 37 |  | Dai IC20 38 |  | Dai IC20 39 |  | Dai IC20 40 |  | Dai IC20 41 |  | Dai IC20 42 |  | Dai IC20 43 |  | Dai IC20 44 |  | Dai IC20 45 |  | Dai IC20 46 |  | Dai IC20 47 |  | Dai IC20 48 |  | Dai IC20 49 |  | Dai IC20 50 |  | Dai IC20 51 |  | Dai IC20 52 |  | Dai IC20 53 |  | Dai IC20 54 |  | Dai IC20 55 |  | Dai IC20 56 |  | Dai IC20 57 |  | Dai IC20 58 |  | Dai IC20 59 |  | Dai IC20 60 |  | Dai IC20 61 |  | Dai IC20 62 |  | Dai IC20 63 |  | Dai IC20 64 |  | Dai IC20 65 |  | Dai IC20 66 |  | Dai IC20 67 |  | Dai IC20 68 |  | Dai IC20 69 |  | Dai IC20 70 |  | Dai IC20 71 |  | Dai IC20 72 |  | Dai IC20 73 |  | Dai IC20 74 |  | Dai IC20 75 |  | Dai IC20 76 |  | Dai IC20 77 |  | Dai IC20 78 |  | Dai IC20 79 |  | Dai IC20 80 |  | Dai IC20 81 |  | Dai IC20 82 |  | Dai IC20 83 |  | Dai IC20 84 |  | Dai IC20 85 |  | Dai IC20 86 |  | Dai IC20 87 |  | Dai IC20 88 |  | Dai IC20 89 |  | Dai IC20 90 |  | Dai IC20 91 |  | Dai IC20 92 |  | Dai IC20 93 |  | Dai IC20 94 |  | Dai IC20 95 |  | Dai IC20 96 |  | Dai IC20 97 |  | Dai IC20 98 |  | Dai IC20 99 |  | Dai IC20 100 |  | Dai IC20 101 |  | Dai IC20 102 |  | Dai IC20 103 |  | Dai IC20 104 |  | Dai IC20 105 |  | Dai IC20 106 |  | Dai IC20 107 |  | Dai IC20 108 |  | Dai IC20 109 |  | Dai IC20 110 |  | Dai IC20 111 |  | Dai IC20 112 |  | Dai IC20 113 |  | Dai IC20 114 |  | Dai IC20 115 |  | Dai IC20 116 |  | Dai IC20 117 |  | Dai IC20 118 |  | Dai IC20 119 |  | Dai IC20 120 |  | Dai IC20 121 |  | Dai IC20 122 |  | Dai IC20 123 |  | Dai IC20 124 |  | Dai IC20 125 |  | Dai IC20 126 |  | Dai IC20 127 |  | Dai IC20 128 |  | Dai IC20 129 |  | Dai IC20 130 |  | Dai IC20 131 |  | Dai IC20 132 |  | Dai IC20 133 |  | Dai IC20 134 |  | Dai IC20 135 |  | Dai IC20 136 |  | Dai IC20 137 |  | Dai IC20 138 |  | Dai IC20 139 |  | Dai IC20 140 |  | Dai IC20 141 |  | Dai IC20 142 |  | Dai IC20 143 |  | Dai IC20 144 |  | Dai IC20 145 |  | Dai IC20 146 |  | Dai IC20 147 |  | Dai IC20 148 |  | Dai IC20 149 |  | Dai IC20 150 |  | Dai IC20 151 |  | Dai IC20 152 |  | Dai IC20 153 |  | Dai IC20 154 |  | Dai IC20 155 |  | Dai IC20 156 |  | Dai IC20 157 |  | Dai IC20 158 |  | Dai IC20 159 |  | Dai IC20 160 |  | Dai IC20 161 |  | Dai IC20 162 |  | Dai IC20 163 |  | Dai IC20 164 |  | Dai IC20 165 |  | Dai IC20 166 |  | Dai IC20 167 |  | Dai IC20 168 |  | Dai IC20 169 |  | Dai IC20 170 |  | Dai IC20 171 |  | Dai IC20 172 |  | Dai IC20 173 |  | Dai IC20 174 |  | Dai IC20 175 |  | Dai IC20 176 |  | Dai IC20 177 |  | Dai IC20 178 |  | Dai IC20 179 |  | Dai IC20 180 |  | Dai IC20 181 |  | Dai IC20 182 |  | Dai IC20 183 |  | Dai IC20 184 |  | Dai IC20 185 |  | Dai IC20 186 |  | Dai IC20 187 |  | Dai IC20 188 |  | Dai IC20 189 |  | Dai IC20 190 |  | Dai IC20 191 |  | Dai IC20 192 |  | Dai IC20 193 |  | Dai IC20 194 |  | Dai IC20 195 |  | Dai IC20 196 |  | Dai IC20 197 |  | Dai IC20 198 |  | Dai IC20 199 |  | Dai IC20 200 |  | Dai IC20 201 |  | Dai IC20 202 |  | Dai IC20 203 |  | Dai IC20 204 |  | Dai IC20 205 |  | Dai IC20 206 |  | Dai IC20 207 |  | Dai IC20 208 |  | Dai IC20 209 |  | Dai IC20 210 |  | Dai IC20 211 |  | Dai IC20 212 |  | Dai IC20 213 |  | Dai IC20 214 |  | Dai IC20 215 |  | Dai IC20 216 |  | Dai IC20 217 |  | Dai IC20 218 |  | Dai IC20 219 |  | Dai IC20 220 |  | Dai IC20 221 |  | Dai IC20 222 |  | Dai IC20 223 |  | Dai IC20 224 |  | Dai IC20 225 |  | Dai IC20 226 |  | Dai IC20 227 |  | Dai IC20 228 |  | Dai IC20 229 |  | Dai IC20 230 |  | Dai IC20 231 |  | Dai IC20 232 |  | Dai IC20 233 |  | Dai IC20 234 |  | Dai IC20 235 |  | Dai IC20 236 |  | Dai IC20 237 |  | Dai IC20 238 |  | Dai IC20 239 |  | Dai IC20 240 |  | Dai IC20 241 |  | Dai IC20 242 |  | Dai IC20 243 |  | Dai IC20 244 |  | Dai IC20 245 |  | Dai IC20 246 |  | Dai IC20 247 |  | Dai IC20 248 |  | Dai IC20 249 |  | Dai IC20 250 |  | Dai IC20 251 |  | Dai IC20 252 |  | Dai IC20 253 |  | Dai IC20 254 |  | Dai IC20 255 |  | Dai IC20 256 |  | Dai IC20 257 |  | Dai IC20 258 |  | Dai IC20 259 |  | Dai IC20 260 |  | Dai IC20 261 |  | Dai IC20 262 |  | Dai IC20 263 |  | Dai IC20 264 |  | Dai IC20 265 |  | Dai IC20 266 |  | Dai IC20 267 |  | Dai IC20 268 |  | Dai IC20 269 |  | Dai IC20 270 |  | Dai IC20 271 |  | Dai IC20 272 |  | Dai IC20 273 |  | Dai IC20 274 |  | Dai IC20 275 |  | Dai IC20 276 |  | Dai IC20 277 |  | Dai IC20 278 |  | Dai IC20 279 |  | Dai IC20 280 |  | Dai IC20 281 |  | Dai IC20 282 |  | Dai IC20 283 |  | Dai IC20 284 |  | Dai IC20 285 |  | Dai IC20 286 |  | Dai IC20 287 |  | Dai IC20 288 |  | Dai IC20 289 |  | Dai IC20 290 |  | Dai IC20 291 |  | Dai IC20 292 |  | Dai IC20 293 |  | Dai IC20 294 |  | Dai IC20 295 |  | Dai IC20 296 |  | Dai IC20 297 |  | Dai IC20 298 |  | Dai IC20 299 |  | Dai IC20 300 |  | Dai IC20 301 |  | Dai IC20 302 |  | Dai IC20 303 |  | Dai IC20 304 |  | Dai IC20 305 |  | Dai IC20 306 |  | Dai IC20 307 |  | Dai IC20 308 |  | Dai IC20 309 |  | Dai IC20 310 |  | Dai IC20 311 |  | Dai IC20 312 |  | Dai IC20 313 |  | Dai IC20 314 |  | Dai IC20 315 |  | Dai IC20 316 |  | Dai IC20 317 |  | Dai IC20 318 |  | Dai IC20 319 |  | Dai IC20 320 |  | Dai IC20 321 |  | Dai IC20 322 |  | Dai IC20 323 |  | Dai IC20 324 |  | Dai IC20 325 |  | Dai IC20 326 |  | Dai IC20 327 |  | Dai IC20 328 |  | Dai IC20 329 |  | Dai IC20 330 |  | Dai IC20 331 |  | Dai IC20 332 |  | Dai IC20 333 |  | Dai IC20 334 |  | Dai IC20 335 |  | Dai IC20 336 |  | Dai IC20 337 |  | Dai IC20 338 |  | Dai IC20 339 |  | Dai IC20 340 |  | Dai IC20 341 |  | Dai IC20 342 |  | Dai IC20 343 |  | Dai IC20 344 |  | Dai IC20 345 |  | Dai IC20 346 |  | Dai IC20 347 |  | Dai IC20 348 |  | Dai IC20 349 |  | Dai IC20 350 |  | Dai IC20 351 |  | Dai IC20 352 |  | Dai IC20 353 |  | Dai IC20 354 |  | Dai IC20 355 |  | Dai IC20 356 |  | Dai IC20 357 |  | Dai IC20 358 |  | Dai IC20 359 |  | Dai IC20 360 |  | Dai IC20 361 |  | Dai IC20 362 |  | Dai IC20 363 |  | Dai IC20 364 |  | Dai IC20 365 |  | Dai IC20 366 |  | Dai IC20 367 |  | Dai IC20 368 |  | Dai IC20 369 |  | Dai IC20 370 |  | Dai IC20 371 |  | Dai IC20 372 |  | Dai IC20 373 |  | Dai IC20 374 |  | Dai IC20 375 |  | Dai IC20 376 |  | Dai IC20 377 |  | Dai IC20 378 |  | Dai IC20 379 |  | Dai IC20 380 |  | Dai IC20 381 |  | Dai IC20 382 |  | Dai IC20 383 |  | Dai IC20 384 |  | Dai IC20 |
|--------------|--|---------|--|---------|--|---------|--|-------------|--|-------------|--|-------------|--|-------------|--|-------------|--|-------------|--|-------------|--|-------------|--|-------------|--|-------------|--|-------------|--|-------------|--|-------------|--|-------------|--|-------------|--|-------------|--|-------------|--|-------------|--|-------------|--|-------------|--|-------------|--|-------------|--|-------------|--|-------------|--|-------------|--|-------------|--|-------------|--|-------------|--|-------------|--|-------------|--|-------------|--|-------------|--|-------------|--|-------------|--|-------------|--|-------------|--|-------------|--|-------------|--|-------------|--|-------------|--|-------------|--|-------------|--|-------------|--|-------------|--|-------------|--|-------------|--|-------------|--|-------------|--|-------------|--|-------------|--|-------------|--|-------------|--|-------------|--|-------------|--|-------------|--|-------------|--|-------------|--|-------------|--|-------------|--|-------------|--|-------------|--|-------------|--|-------------|--|-------------|--|-------------|--|-------------|--|-------------|--|-------------|--|-------------|--|-------------|--|-------------|--|-------------|--|-------------|--|-------------|--|-------------|--|-------------|--|-------------|--|-------------|--|-------------|--|-------------|--|-------------|--|-------------|--|-------------|--|-------------|--|-------------|--|-------------|--|-------------|--|-------------|--|-------------|--|-------------|--|-------------|--|-------------|--|-------------|--|-------------|--|-------------|--|-------------|--|-------------|--|-------------|--|-------------|--|--------------|--|--------------|--|--------------|--|--------------|--|--------------|--|--------------|--|--------------|--|--------------|--|--------------|--|--------------|--|--------------|--|--------------|--|--------------|--|--------------|--|--------------|--|--------------|--|--------------|--|--------------|--|--------------|--|--------------|--|--------------|--|--------------|--|--------------|--|--------------|--|--------------|--|--------------|--|--------------|--|--------------|--|--------------|--|--------------|--|--------------|--|--------------|--|--------------|--|--------------|--|--------------|--|--------------|--|--------------|--|--------------|--|--------------|--|--------------|--|--------------|--|--------------|--|--------------|--|--------------|--|--------------|--|--------------|--|--------------|--|--------------|--|--------------|--|--------------|--|--------------|--|--------------|--|--------------|--|--------------|--|--------------|--|--------------|--|--------------|--|--------------|--|--------------|--|--------------|--|--------------|--|--------------|--|--------------|--|--------------|--|--------------|--|--------------|--|--------------|--|--------------|--|--------------|--|--------------|--|--------------|--|--------------|--|--------------|--|--------------|--|--------------|--|--------------|--|--------------|--|--------------|--|--------------|--|--------------|--|--------------|--|--------------|--|--------------|--|--------------|--|--------------|--|--------------|--|--------------|--|--------------|--|--------------|--|--------------|--|--------------|--|--------------|--|--------------|--|--------------|--|--------------|--|--------------|--|--------------|--|--------------|--|--------------|--|--------------|--|--------------|--|--------------|--|--------------|--|--------------|--|--------------|--|--------------|--|--------------|--|--------------|--|--------------|--|--------------|--|--------------|--|--------------|--|--------------|--|--------------|--|--------------|--|--------------|--|--------------|--|--------------|--|--------------|--|--------------|--|--------------|--|--------------|--|--------------|--|--------------|--|--------------|--|--------------|--|--------------|--|--------------|--|--------------|--|--------------|--|--------------|--|--------------|--|--------------|--|--------------|--|--------------|--|--------------|--|--------------|--|--------------|--|--------------|--|--------------|--|--------------|--|--------------|--|--------------|--|--------------|--|--------------|--|--------------|--|--------------|--|--------------|--|--------------|--|--------------|--|--------------|--|--------------|--|--------------|--|--------------|--|--------------|--|--------------|--|--------------|--|--------------|--|--------------|--|--------------|--|--------------|--|--------------|--|--------------|--|--------------|--|--------------|--|--------------|--|--------------|--|--------------|--|--------------|--|--------------|--|--------------|--|--------------|--|--------------|--|--------------|--|--------------|--|--------------|--|--------------|--|--------------|--|--------------|--|--------------|--|--------------|--|--------------|--|--------------|--|--------------|--|--------------|--|--------------|--|--------------|--|--------------|--|--------------|--|--------------|--|--------------|--|--------------|--|--------------|--|--------------|--|--------------|--|--------------|--|--------------|--|--------------|--|--------------|--|--------------|--|--------------|--|--------------|--|--------------|--|--------------|--|--------------|--|--------------|--|--------------|--|--------------|--|--------------|--|--------------|--|--------------|--|--------------|--|--------------|--|--------------|--|--------------|--|--------------|--|--------------|--|--------------|--|--------------|--|--------------|--|--------------|--|--------------|--|--------------|--|--------------|--|--------------|--|--------------|--|--------------|--|--------------|--|--------------|--|--------------|--|--------------|--|--------------|--|--------------|--|--------------|--|--------------|--|--------------|--|--------------|--|--------------|--|--------------|--|--------------|--|--------------|--|--------------|--|--------------|--|--------------|--|--------------|--|--------------|--|--------------|--|--------------|--|--------------|--|--------------|--|--------------|--|--------------|--|--------------|--|--------------|--|--------------|--|--------------|--|--------------|--|--------------|--|--------------|--|--------------|--|--------------|--|--------------|--|--------------|--|--------------|--|--------------|--|--------------|--|--------------|--|--------------|--|--------------|--|--------------|--|--------------|--|--------------|--|--------------|--|--------------|--|--------------|--|--------------|--|--------------|--|--------------|--|--------------|--|--------------|--|--------------|--|--------------|--|--------------|--|--------------|--|--------------|--|----------|
|--------------|--|---------|--|---------|--|---------|--|-------------|--|-------------|--|-------------|--|-------------|--|-------------|--|-------------|--|-------------|--|-------------|--|-------------|--|-------------|--|-------------|--|-------------|--|-------------|--|-------------|--|-------------|--|-------------|--|-------------|--|-------------|--|-------------|--|-------------|--|-------------|--|-------------|--|-------------|--|-------------|--|-------------|--|-------------|--|-------------|--|-------------|--|-------------|--|-------------|--|-------------|--|-------------|--|-------------|--|-------------|--|-------------|--|-------------|--|-------------|--|-------------|--|-------------|--|-------------|--|-------------|--|-------------|--|-------------|--|-------------|--|-------------|--|-------------|--|-------------|--|-------------|--|-------------|--|-------------|--|-------------|--|-------------|--|-------------|--|-------------|--|-------------|--|-------------|--|-------------|--|-------------|--|-------------|--|-------------|--|-------------|--|-------------|--|-------------|--|-------------|--|-------------|--|-------------|--|-------------|--|-------------|--|-------------|--|-------------|--|-------------|--|-------------|--|-------------|--|-------------|--|-------------|--|-------------|--|-------------|--|-------------|--|-------------|--|-------------|--|-------------|--|-------------|--|-------------|--|-------------|--|-------------|--|-------------|--|-------------|--|-------------|--|-------------|--|-------------|--|-------------|--|-------------|--|-------------|--|-------------|--|-------------|--|-------------|--|-------------|--|-------------|--|-------------|--|--------------|--|--------------|--|--------------|--|--------------|--|--------------|--|--------------|--|--------------|--|--------------|--|--------------|--|--------------|--|--------------|--|--------------|--|--------------|--|--------------|--|--------------|--|--------------|--|--------------|--|--------------|--|--------------|--|--------------|--|--------------|--|--------------|--|--------------|--|--------------|--|--------------|--|--------------|--|--------------|--|--------------|--|--------------|--|--------------|--|--------------|--|--------------|--|--------------|--|--------------|--|--------------|--|--------------|--|--------------|--|--------------|--|--------------|--|--------------|--|--------------|--|--------------|--|--------------|--|--------------|--|--------------|--|--------------|--|--------------|--|--------------|--|--------------|--|--------------|--|--------------|--|--------------|--|--------------|--|--------------|--|--------------|--|--------------|--|--------------|--|--------------|--|--------------|--|--------------|--|--------------|--|--------------|--|--------------|--|--------------|--|--------------|--|--------------|--|--------------|--|--------------|--|--------------|--|--------------|--|--------------|--|--------------|--|--------------|--|--------------|--|--------------|--|--------------|--|--------------|--|--------------|--|--------------|--|--------------|--|--------------|--|--------------|--|--------------|--|--------------|--|--------------|--|--------------|--|--------------|--|--------------|--|--------------|--|--------------|--|--------------|--|--------------|--|--------------|--|--------------|--|--------------|--|--------------|--|--------------|--|--------------|--|--------------|--|--------------|--|--------------|--|--------------|--|--------------|--|--------------|--|--------------|--|--------------|--|--------------|--|--------------|--|--------------|--|--------------|--|--------------|--|--------------|--|--------------|--|--------------|--|--------------|--|--------------|--|--------------|--|--------------|--|--------------|--|--------------|--|--------------|--|--------------|--|--------------|--|--------------|--|--------------|--|--------------|--|--------------|--|--------------|--|--------------|--|--------------|--|--------------|--|--------------|--|--------------|--|--------------|--|--------------|--|--------------|--|--------------|--|--------------|--|--------------|--|--------------|--|--------------|--|--------------|--|--------------|--|--------------|--|--------------|--|--------------|--|--------------|--|--------------|--|--------------|--|--------------|--|--------------|--|--------------|--|--------------|--|--------------|--|--------------|--|--------------|--|--------------|--|--------------|--|--------------|--|--------------|--|--------------|--|--------------|--|--------------|--|--------------|--|--------------|--|--------------|--|--------------|--|--------------|--|--------------|--|--------------|--|--------------|--|--------------|--|--------------|--|--------------|--|--------------|--|--------------|--|--------------|--|--------------|--|--------------|--|--------------|--|--------------|--|--------------|--|--------------|--|--------------|--|--------------|--|--------------|--|--------------|--|--------------|--|--------------|--|--------------|--|--------------|--|--------------|--|--------------|--|--------------|--|--------------|--|--------------|--|--------------|--|--------------|--|--------------|--|--------------|--|--------------|--|--------------|--|--------------|--|--------------|--|--------------|--|--------------|--|--------------|--|--------------|--|--------------|--|--------------|--|--------------|--|--------------|--|--------------|--|--------------|--|--------------|--|--------------|--|--------------|--|--------------|--|--------------|--|--------------|--|--------------|--|--------------|--|--------------|--|--------------|--|--------------|--|--------------|--|--------------|--|--------------|--|--------------|--|--------------|--|--------------|--|--------------|--|--------------|--|--------------|--|--------------|--|--------------|--|--------------|--|--------------|--|--------------|--|--------------|--|--------------|--|--------------|--|--------------|--|--------------|--|--------------|--|--------------|--|--------------|--|--------------|--|--------------|--|--------------|--|--------------|--|--------------|--|--------------|--|--------------|--|--------------|--|--------------|--|--------------|--|--------------|--|--------------|--|--------------|--|--------------|--|--------------|--|--------------|--|--------------|--|--------------|--|--------------|--|--------------|--|--------------|--|--------------|--|--------------|--|--------------|--|--------------|--|--------------|--|--------------|--|--------------|--|--------------|--|--------------|--|--------------|--|--------------|--|--------------|--|--------------|--|--------------|--|--------------|--|--------------|--|--------------|--|----------|

Supplementary Table S1. Overview on the abundance of all relatively quantified 5180 proteins

| Protein name |  |  | UniProt |  | control |  | control |  | Dai IC20 01 |  | Dai IC20 02 |  | Dai IC20 03 |  | Dai IC20 04 |  | Dai IC20 05 |  | Dai IC20 06 |  | Dai IC20 07 |  | Dai IC20 08 |  | Dai IC20 09 |  | Dai IC20 10 |  | Dai IC20 11 |  | Dai IC20 12 |  | Dai IC20 13 |  | Dai IC20 14 |  | Dai IC20 15 |  | Dai IC20 16 |  | Dai IC20 17 |  | Dai IC20 18 |  | Dai IC20 19 |  | Dai IC20 20 |  | Dai IC20 21 |  | Dai IC20 22 |  | Dai IC20 23 |  | Dai IC20 24 |  | Dai IC20 25 |  | Dai IC20 26 |  | Dai IC20 27 |  | Dai IC20 28 |  | Dai IC20 29 |  | Dai IC20 30 |  | Dai IC20 31 |  | Dai IC20 32 |  | Dai IC20 33 |  | Dai IC20 34 |  | Dai IC20 35 |  | Dai IC20 36 |  | Dai IC20 37 |  | Dai IC20 38 |  | Dai IC20 39 |  | Dai IC20 40 |  | Dai IC20 41 |  | Dai IC20 42 |  | Dai IC20 43 |  | Dai IC20 44 |  | Dai IC20 45 |  | Dai IC20 46 |  | Dai IC20 47 |  | Dai IC20 48 |  | Dai IC20 49 |  | Dai IC20 50 |  | Dai IC20 51 |  | Dai IC20 52 |  | Dai IC20 53 |  | Dai IC20 54 |  | Dai IC20 55 |  | Dai IC20 56 |  | Dai IC20 57 |  | Dai IC20 58 |  | Dai IC20 59 |  | Dai IC20 60 |  | Dai IC20 61 |  | Dai IC20 62 |  | Dai IC20 63 |  | Dai IC20 64 |  | Dai IC20 65 |  | Dai IC20 66 |  | Dai IC20 67 |  | Dai IC20 68 |  | Dai IC20 69 |  | Dai IC20 70 |  | Dai IC20 71 |  | Dai IC20 72 |  | Dai IC20 73 |  | Dai IC20 74 |  | Dai IC20 75 |  | Dai IC20 76 |  | Dai IC20 77 |  | Dai IC20 78 |  | Dai IC20 79 |  | Dai IC20 80 |  | Dai IC20 81 |  | Dai IC20 82 |  | Dai IC20 83 |  | Dai IC20 84 |  | Dai IC20 85 |  | Dai IC20 86 |  | Dai IC20 87 |  | Dai IC20 88 |  | Dai IC20 89 |  | Dai IC20 90 |  | Dai IC20 91 |  | Dai IC20 92 |  | Dai IC20 93 |  | Dai IC20 94 |  | Dai IC20 95 |  | Dai IC20 96 |  | Dai IC20 97 |  | Dai IC20 98 |  | Dai IC20 99 |  | Dai IC20 100 |  | Dai IC20 101 |  | Dai IC20 102 |  | Dai IC20 103 |  | Dai IC20 104 |  | Dai IC20 105 |  | Dai IC20 106 |  | Dai IC20 107 |  | Dai IC20 108 |  | Dai IC20 109 |  | Dai IC20 110 |  | Dai IC20 111 |  | Dai IC20 112 |  | Dai IC20 113 |  | Dai IC20 114 |  | Dai IC20 115 |  | Dai IC20 116 |  | Dai IC20 117 |  | Dai IC20 118 |  | Dai IC20 119 |  | Dai IC20 120 |  | Dai IC20 121 |  | Dai IC20 122 |  | Dai IC20 123 |  | Dai IC20 124 |  | Dai IC20 125 |  | Dai IC20 126 |  | Dai IC20 127 |  | Dai IC20 128 |  | Dai IC20 129 |  | Dai IC20 130 |  | Dai IC20 131 |  | Dai IC20 132 |  | Dai IC20 133 |  | Dai IC20 134 |  | Dai IC20 135 |  | Dai IC20 136 |  | Dai IC20 137 |  | Dai IC20 138 |  | Dai IC20 139 |  | Dai IC20 140 |  | Dai IC20 141 |  | Dai IC20 142 |  | Dai IC20 143 |  | Dai IC20 144 |  | Dai IC20 145 |  | Dai IC20 146 |  | Dai IC20 147 |  | Dai IC20 148 |  | Dai IC20 149 |  | Dai IC20 150 |  | Dai IC20 151 |  | Dai IC20 152 |  | Dai IC20 153 |  | Dai IC20 154 |  | Dai IC20 155 |  | Dai IC20 156 |  | Dai IC20 157 |  | Dai IC20 158 |  | Dai IC20 159 |  | Dai IC20 160 |  | Dai IC20 161 |  | Dai IC20 162 |  | Dai IC20 163 |  | Dai IC20 164 |  | Dai IC20 165 |  | Dai IC20 166 |  | Dai IC20 167 |  | Dai IC20 168 |  | Dai IC20 169 |  | Dai IC20 170 |  | Dai IC20 171 |  | Dai IC20 172 |  | Dai IC20 173 |  | Dai IC20 174 |  | Dai IC20 175 |  | Dai IC20 176 |  | Dai IC20 177 |  | Dai IC20 178 |  | Dai IC20 179 |  | Dai IC20 180 |  | Dai IC20 181 |  | Dai IC20 182 |  | Dai IC20 183 |  | Dai IC20 184 |  | Dai IC20 185 |  | Dai IC20 186 |  | Dai IC20 187 |  | Dai IC20 188 |  | Dai IC20 189 |  | Dai IC20 190 |  | Dai IC20 191 |  | Dai IC20 192 |  | Dai IC20 193 |  | Dai IC20 194 |  | Dai IC20 195 |  | Dai IC20 196 |  | Dai IC20 197 |  | Dai IC20 198 |  | Dai IC20 199 |  | Dai IC20 200 |  | Dai IC20 201 |  | Dai IC20 202 |  | Dai IC20 203 |  | Dai IC20 204 |  | Dai IC20 205 |  | Dai IC20 206 |  | Dai IC20 207 |  | Dai IC20 208 |  | Dai IC20 209 |  | Dai IC20 210 |  | Dai IC20 211 |  | Dai IC20 212 |  | Dai IC20 213 |  | Dai IC20 214 |  | Dai IC20 215 |  | Dai IC20 216 |  | Dai IC20 217 |  | Dai IC20 218 |  | Dai IC20 219 |  | Dai IC20 220 |  | Dai IC20 221 |  | Dai IC20 222 |  | Dai IC20 223 |  | Dai IC20 224 |  | Dai IC20 225 |  | Dai IC20 226 |  | Dai IC20 227 |  | Dai IC20 228 |  | Dai IC20 229 |  | Dai IC20 230 |  | Dai IC20 231 |  | Dai IC20 232 |  | Dai IC20 233 |  | Dai IC20 234 |  | Dai IC20 235 |  | Dai IC20 236 |  | Dai IC20 237 |  | Dai IC20 238 |  | Dai IC20 239 |  | Dai IC20 240 |  | Dai IC20 241 |  | Dai IC20 242 |  | Dai IC20 243 |  | Dai IC20 244 |  |
|--------------|--|--|---------|--|---------|--|---------|--|-------------|--|-------------|--|-------------|--|-------------|--|-------------|--|-------------|--|-------------|--|-------------|--|-------------|--|-------------|--|-------------|--|-------------|--|-------------|--|-------------|--|-------------|--|-------------|--|-------------|--|-------------|--|-------------|--|-------------|--|-------------|--|-------------|--|-------------|--|-------------|--|-------------|--|-------------|--|-------------|--|-------------|--|-------------|--|-------------|--|-------------|--|-------------|--|-------------|--|-------------|--|-------------|--|-------------|--|-------------|--|-------------|--|-------------|--|-------------|--|-------------|--|-------------|--|-------------|--|-------------|--|-------------|--|-------------|--|-------------|--|-------------|--|-------------|--|-------------|--|-------------|--|-------------|--|-------------|--|-------------|--|-------------|--|-------------|--|-------------|--|-------------|--|-------------|--|-------------|--|-------------|--|-------------|--|-------------|--|-------------|--|-------------|--|-------------|--|-------------|--|-------------|--|-------------|--|-------------|--|-------------|--|-------------|--|-------------|--|-------------|--|-------------|--|-------------|--|-------------|--|-------------|--|-------------|--|-------------|--|-------------|--|-------------|--|-------------|--|-------------|--|-------------|--|-------------|--|-------------|--|-------------|--|-------------|--|-------------|--|-------------|--|-------------|--|-------------|--|-------------|--|-------------|--|-------------|--|-------------|--|-------------|--|-------------|--|--------------|--|--------------|--|--------------|--|--------------|--|--------------|--|--------------|--|--------------|--|--------------|--|--------------|--|--------------|--|--------------|--|--------------|--|--------------|--|--------------|--|--------------|--|--------------|--|--------------|--|--------------|--|--------------|--|--------------|--|--------------|--|--------------|--|--------------|--|--------------|--|--------------|--|--------------|--|--------------|--|--------------|--|--------------|--|--------------|--|--------------|--|--------------|--|--------------|--|--------------|--|--------------|--|--------------|--|--------------|--|--------------|--|--------------|--|--------------|--|--------------|--|--------------|--|--------------|--|--------------|--|--------------|--|--------------|--|--------------|--|--------------|--|--------------|--|--------------|--|--------------|--|--------------|--|--------------|--|--------------|--|--------------|--|--------------|--|--------------|--|--------------|--|--------------|--|--------------|--|--------------|--|--------------|--|--------------|--|--------------|--|--------------|--|--------------|--|--------------|--|--------------|--|--------------|--|--------------|--|--------------|--|--------------|--|--------------|--|--------------|--|--------------|--|--------------|--|--------------|--|--------------|--|--------------|--|--------------|--|--------------|--|--------------|--|--------------|--|--------------|--|--------------|--|--------------|--|--------------|--|--------------|--|--------------|--|--------------|--|--------------|--|--------------|--|--------------|--|--------------|--|--------------|--|--------------|--|--------------|--|--------------|--|--------------|--|--------------|--|--------------|--|--------------|--|--------------|--|--------------|--|--------------|--|--------------|--|--------------|--|--------------|--|--------------|--|--------------|--|--------------|--|--------------|--|--------------|--|--------------|--|--------------|--|--------------|--|--------------|--|--------------|--|--------------|--|--------------|--|--------------|--|--------------|--|--------------|--|--------------|--|--------------|--|--------------|--|--------------|--|--------------|--|--------------|--|--------------|--|--------------|--|--------------|--|--------------|--|--------------|--|--------------|--|--------------|--|--------------|--|--------------|--|--------------|--|--------------|--|--------------|--|--------------|--|--------------|--|--------------|--|--------------|--|
|--------------|--|--|---------|--|---------|--|---------|--|-------------|--|-------------|--|-------------|--|-------------|--|-------------|--|-------------|--|-------------|--|-------------|--|-------------|--|-------------|--|-------------|--|-------------|--|-------------|--|-------------|--|-------------|--|-------------|--|-------------|--|-------------|--|-------------|--|-------------|--|-------------|--|-------------|--|-------------|--|-------------|--|-------------|--|-------------|--|-------------|--|-------------|--|-------------|--|-------------|--|-------------|--|-------------|--|-------------|--|-------------|--|-------------|--|-------------|--|-------------|--|-------------|--|-------------|--|-------------|--|-------------|--|-------------|--|-------------|--|-------------|--|-------------|--|-------------|--|-------------|--|-------------|--|-------------|--|-------------|--|-------------|--|-------------|--|-------------|--|-------------|--|-------------|--|-------------|--|-------------|--|-------------|--|-------------|--|-------------|--|-------------|--|-------------|--|-------------|--|-------------|--|-------------|--|-------------|--|-------------|--|-------------|--|-------------|--|-------------|--|-------------|--|-------------|--|-------------|--|-------------|--|-------------|--|-------------|--|-------------|--|-------------|--|-------------|--|-------------|--|-------------|--|-------------|--|-------------|--|-------------|--|-------------|--|-------------|--|-------------|--|-------------|--|-------------|--|-------------|--|-------------|--|-------------|--|-------------|--|-------------|--|-------------|--|-------------|--|-------------|--|-------------|--|-------------|--|--------------|--|--------------|--|--------------|--|--------------|--|--------------|--|--------------|--|--------------|--|--------------|--|--------------|--|--------------|--|--------------|--|--------------|--|--------------|--|--------------|--|--------------|--|--------------|--|--------------|--|--------------|--|--------------|--|--------------|--|--------------|--|--------------|--|--------------|--|--------------|--|--------------|--|--------------|--|--------------|--|--------------|--|--------------|--|--------------|--|--------------|--|--------------|--|--------------|--|--------------|--|--------------|--|--------------|--|--------------|--|--------------|--|--------------|--|--------------|--|--------------|--|--------------|--|--------------|--|--------------|--|--------------|--|--------------|--|--------------|--|--------------|--|--------------|--|--------------|--|--------------|--|--------------|--|--------------|--|--------------|--|--------------|--|--------------|--|--------------|--|--------------|--|--------------|--|--------------|--|--------------|--|--------------|--|--------------|--|--------------|--|--------------|--|--------------|--|--------------|--|--------------|--|--------------|--|--------------|--|--------------|--|--------------|--|--------------|--|--------------|--|--------------|--|--------------|--|--------------|--|--------------|--|--------------|--|--------------|--|--------------|--|--------------|--|--------------|--|--------------|--|--------------|--|--------------|--|--------------|--|--------------|--|--------------|--|--------------|--|--------------|--|--------------|--|--------------|--|--------------|--|--------------|--|--------------|--|--------------|--|--------------|--|--------------|--|--------------|--|--------------|--|--------------|--|--------------|--|--------------|--|--------------|--|--------------|--|--------------|--|--------------|--|--------------|--|--------------|--|--------------|--|--------------|--|--------------|--|--------------|--|--------------|--|--------------|--|--------------|--|--------------|--|--------------|--|--------------|--|--------------|--|--------------|--|--------------|--|--------------|--|--------------|--|--------------|--|--------------|--|--------------|--|--------------|--|--------------|--|--------------|--|--------------|--|--------------|--|--------------|--|--------------|--|--------------|--|--------------|--|--------------|--|--------------|--|--------------|--|--------------|--|--------------|--|--------------|--|--------------|--|--------------|--|

Supplementary Table S1. Overview on the abundance of all relatively quantified 5180 proteins

| Protein name |  | UniProt | control | control | Dai IC20 01 | Dai IC20 02 | Dai IC20 03 | Dai IC20 04 | Dai IC20 05 | Dai IC20 06 | Dai IC20 07 | Dai IC20 08 | Dai IC20 09 | Dai IC20 10 | Dai IC20 11 | Dai IC20 12 | Dai IC20 13 | Dai IC20 14 | Dai IC20 15 | Dai IC20 16 | Dai IC20 17 | Dai IC20 18 | Dai IC20 19 | Dai IC20 20 | Dai IC20 21 | Dai IC20 22 | Dai IC20 23 | Dai IC20 24 | Dai IC20 25 | Dai IC20 26 | Dai IC20 27 | Dai IC20 28 | Dai IC20 29 | Dai IC20 30 | Dai IC20 31 | Dai IC20 32 | Dai IC20 33 | Dai IC20 34 | Dai IC20 35 | Dai IC20 36 | Dai IC20 37 | Dai IC20 38 | Dai IC20 39 | Dai IC20 40 | Dai IC20 41 | Dai IC20 42 | Dai IC20 43 | Dai IC20 44 | Dai IC20 45 | Dai IC20 46 | Dai IC20 47 | Dai IC20 48 | Dai IC20 49 | Dai IC20 50 | Dai IC20 51 | Dai IC20 52 | Dai IC20 53 | Dai IC20 54 | Dai IC20 55 | Dai IC20 56 | Dai IC20 57 | Dai IC20 58 | Dai IC20 59 | Dai IC20 60 | Dai IC20 61 | Dai IC20 62 | Dai IC20 63 | Dai IC20 64 | Dai IC20 65 | Dai IC20 66 | Dai IC20 67 | Dai IC20 68 | Dai IC20 69 | Dai IC20 70 | Dai IC20 71 | Dai IC20 72 | Dai IC20 73 | Dai IC20 74 | Dai IC20 75 | Dai IC20 76 | Dai IC20 77 | Dai IC20 78 | Dai IC20 79 | Dai IC20 80 | Dai IC20 81 | Dai IC20 82 | Dai IC20 83 | Dai IC20 84 | Dai IC20 85 | Dai IC20 86 | Dai IC20 87 | Dai IC20 88 | Dai IC20 89 | Dai IC20 90 | Dai IC20 91 | Dai IC20 92 | Dai IC20 93 | Dai IC20 94 | Dai IC20 95 | Dai IC20 96 | Dai IC20 97 | Dai IC20 98 | Dai IC20 99 | Dai IC20 100 | Dai IC20 101 | Dai IC20 102 | Dai IC20 103 | Dai IC20 104 | Dai IC20 105 | Dai IC20 106 | Dai IC20 107 | Dai IC20 108 | Dai IC20 109 | Dai IC20 110 | Dai IC20 111 | Dai IC20 112 | Dai IC20 113 | Dai IC20 114 | Dai IC20 115 | Dai IC20 116 | Dai IC20 117 | Dai IC20 118 | Dai IC20 119 | Dai IC20 120 | Dai IC20 121 | Dai IC20 122 | Dai IC20 123 | Dai IC20 124 | Dai IC20 125 | Dai IC20 126 | Dai IC20 127 | Dai IC20 128 | Dai IC20 129 | Dai IC20 130 | Dai IC20 131 | Dai IC20 132 | Dai IC20 133 | Dai IC20 134 | Dai IC20 135 | Dai IC20 136 | Dai IC20 137 | Dai IC20 138 | Dai IC20 139 | Dai IC20 140 | Dai IC20 141 | Dai IC20 142 | Dai IC20 143 | Dai IC20 144 | Dai IC20 145 | Dai IC20 146 | Dai IC20 147 | Dai IC20 148 | Dai IC20 149 | Dai IC20 150 | Dai IC20 151 | Dai IC20 152 | Dai IC20 153 | Dai IC20 154 | Dai IC20 155 | Dai IC20 156 | Dai IC20 157 | Dai IC20 158 | Dai IC20 159 | Dai IC20 160 | Dai IC20 161 | Dai IC20 162 | Dai IC20 163 | Dai IC20 164 | Dai IC20 165 | Dai IC20 166 | Dai IC20 167 | Dai IC20 168 | Dai IC20 169 | Dai IC20 170 | Dai IC20 171 | Dai IC20 172 | Dai IC20 173 | Dai IC20 174 | Dai IC20 175 | Dai IC20 176 | Dai IC20 177 | Dai IC20 178 | Dai IC20 179 | Dai IC20 180 | Dai IC20 181 | Dai IC20 182 | Dai IC20 183 | Dai IC20 184 | Dai IC20 185 | Dai IC20 186 | Dai IC20 187 | Dai IC20 188 | Dai IC20 189 | Dai IC20 190 | Dai IC20 191 | Dai IC20 192 | Dai IC20 193 | Dai IC20 194 | Dai IC20 195 | Dai IC20 196 | Dai IC20 197 | Dai IC20 198 | Dai IC20 199 | Dai IC20 200 | Dai IC20 201 | Dai IC20 202 | Dai IC20 203 | Dai IC20 204 | Dai IC20 205 | Dai IC20 206 | Dai IC20 207 | Dai IC20 208 | Dai IC20 209 | Dai IC20 210 | Dai IC20 211 | Dai IC20 212 | Dai IC20 213 | Dai IC20 214 | Dai IC20 215 | Dai IC20 216 | Dai IC20 217 | Dai IC20 218 | Dai IC20 219 | Dai IC20 220 | Dai IC20 221 | Dai IC20 222 | Dai IC20 223 | Dai IC20 224 | Dai IC20 225 | Dai IC20 226 | Dai IC20 227 | Dai IC20 228 | Dai IC20 229 | Dai IC20 230 | Dai IC20 231 | Dai IC20 232 | Dai IC20 233 | Dai IC20 234 | Dai IC20 235 | Dai IC20 236 | Dai IC20 237 | Dai IC20 238 | Dai IC20 239 | Dai IC20 240 | Dai IC20 241 | Dai IC20 242 | Dai IC20 243 | Dai IC20 244 | Dai IC20 245 | Dai IC20 246 | Dai IC20 247 | Dai IC20 248 | Dai IC20 249 | Dai IC20 250 | Dai IC20 251 | Dai IC20 252 | Dai IC20 253 | Dai IC20 254 | Dai IC20 255 | Dai IC20 256 | Dai IC20 257 | Dai IC20 258 | Dai IC20 259 | Dai IC20 260 | Dai IC20 261 | Dai IC20 262 | Dai IC20 263 | Dai IC20 264 | Dai IC20 265 | Dai IC20 266 | Dai IC20 267 | Dai IC20 268 | Dai IC20 269 | Dai IC20 270 | Dai IC20 271 | Dai IC20 272 | Dai IC20 273 | Dai IC20 274 | Dai IC20 275 | Dai IC20 276 | Dai IC20 277 | Dai IC20 278 | Dai IC20 279 | Dai IC20 280 | Dai IC20 281 | Dai IC20 282 | Dai IC20 283 | Dai IC20 284 | Dai IC20 285 | Dai IC20 286 | Dai IC20 287 | Dai IC20 288 | Dai IC20 289 | Dai IC20 290 | Dai IC20 291 | Dai IC20 292 | Dai IC20 293 | Dai IC20 294 | Dai IC20 295 | Dai IC20 296 | Dai IC20 297 | Dai IC20 298 | Dai IC20 299 | Dai IC20 300 | Dai IC20 301 | Dai IC20 302 | Dai IC20 303 | Dai IC20 304 | Dai IC20 305 | Dai IC20 306 | Dai IC20 307 | Dai IC20 308 | Dai IC20 309 | Dai IC20 310 | Dai IC20 311 | Dai IC20 312 | Dai IC20 313 | Dai IC20 314 | Dai IC20 315 | Dai IC20 316 | Dai IC20 317 | Dai IC20 318 | Dai IC20 319 | Dai IC20 320 | Dai IC20 321 | Dai IC20 322 | Dai IC20 323 | Dai IC20 324 | Dai IC20 325 | Dai IC20 326 | Dai IC20 327 | Dai IC20 328 | Dai IC20 329 | Dai IC20 330 | Dai IC20 331 | Dai IC20 332 | Dai IC20 333 | Dai IC20 334 | Dai IC20 335 | Dai IC20 336 | Dai IC20 337 | Dai IC20 338 | Dai IC20 339 | Dai IC20 340 | Dai IC20 341 | Dai IC20 342 | Dai IC20 343 | Dai IC20 344 | Dai IC20 345 | Dai IC20 346 | Dai IC20 347 | Dai IC20 348 | Dai IC20 349 | Dai IC20 350 | Dai IC20 351 | Dai IC20 352 | Dai IC20 353 | Dai IC20 354 | Dai IC20 355 | Dai IC20 356 | Dai IC20 357 | Dai IC20 358 | Dai IC20 359 | Dai IC20 360 | Dai IC20 361 | Dai IC20 362 | Dai IC20 363 | Dai IC20 364 | Dai IC20 365 | Dai IC20 366 | Dai IC20 367 | Dai IC20 368 | Dai IC20 369 | Dai IC20 370 | Dai IC20 371 | Dai IC20 372 | Dai IC20 373 | Dai IC20 374 | Dai IC20 375 | Dai IC20 376 | Dai IC20 377 | Dai IC20 378 | Dai IC20 379 | Dai IC20 380 | Dai IC20 381 | Dai IC20 382 | Dai IC20 383 | Dai IC20 384 | Dai IC20 385 | Dai IC20 386 | Dai IC20 387 | Dai IC20 388 | Dai IC20 389 | Dai IC20 390 | Dai IC20 391 | Dai IC20 392 | Dai IC20 393 | Dai IC20 394 | Dai IC20 395 | Dai IC20 396 | Dai IC20 397 | Dai IC20 398 | Dai IC20 399 | Dai IC20 400 | Dai IC20 401 | Dai IC20 402 | Dai IC20 403 | Dai IC20 404 | Dai IC20 405 | Dai IC20 406 | Dai IC20 407 | Dai IC20 408 | Dai IC20 409 | Dai IC20 410 | Dai IC20 411 | Dai IC20 412 | Dai IC20 413 | Dai IC20 414 | Dai IC20 415 | Dai IC20 416 | Dai IC20 417 | Dai IC20 418 | Dai IC20 419 | Dai IC20 420 | Dai IC20 421 | Dai IC20 422 | Dai IC20 423 | Dai IC20 424 | Dai IC20 425 | Dai IC20 426 | Dai IC20 427 | Dai IC20 428 | Dai IC20 429 | Dai IC20 430 | Dai IC20 431 | Dai IC20 432 | Dai IC20 433 | Dai IC20 434 | Dai IC20 435 | Dai IC20 436 | Dai IC20 437 | Dai IC20 438 | Dai IC20 439 | Dai IC20 440 | Dai IC20 441 | Dai IC20 442 | Dai IC20 443 | Dai IC20 444 | Dai IC20 445 | Dai IC20 446 | Dai IC20 447 | Dai IC20 448 | Dai IC20 449 | Dai IC20 450 | Dai IC20 451 | Dai IC20 452 | Dai IC20 453 | Dai IC20 454 | Dai IC20 455 | Dai IC20 456 | Dai IC20 457 | Dai IC20 458 | Dai IC20 459 | Dai IC20 460 | Dai IC20 461 | Dai IC20 462 | Dai IC20 463 | Dai IC20 464 | Dai IC20 465 | Dai IC20 466 | Dai IC20 467 | Dai IC20 468 | Dai IC20 469 | Dai IC20 470 | Dai IC20 471 | Dai IC20 472 | Dai IC20 473 | Dai IC20 474 | Dai IC20 475 | Dai IC20 476 | Dai IC20 477 | Dai IC20 478 | Dai IC20 479 | Dai IC20 480 | Dai IC20 481 | Dai IC20 482 | Dai IC20 483 | Dai IC20 484 | Dai IC20 485 | Dai IC20 486 | Dai IC20 487 | Dai IC20 488 | Dai IC20 489 | Dai IC20 490 | Dai IC20 491 | Dai IC20 492 | Dai IC20 493 | Dai IC20 494 | Dai IC20 495 | Dai IC20 496 | Dai IC20 497 | Dai IC20 498 | Dai IC20 499 | Dai IC20 500 | Dai IC20 501 | Dai IC20 502 | Dai IC20 503 | Dai IC20 504 | Dai IC20 505 | Dai IC20 506 | Dai IC20 507 | Dai IC20 508 | Dai IC20 509 | Dai IC20 510 | Dai IC20 511 | Dai IC20 512 | Dai IC20 513 | Dai IC20 514 | Dai IC20 515 | Dai IC20 516 | Dai IC20 517 | Dai IC20 518 | Dai IC20 519 | Dai IC20 520 | Dai IC20 521 | Dai IC20 522 | Dai IC20 523 | Dai IC20 524 | Dai IC20 525 | Dai IC20 526 | Dai IC20 527 | Dai IC20 528 | Dai IC20 529 | Dai IC20 530 | Dai IC20 531 | Dai IC20 532 | Dai IC20 533 | Dai IC20 534 | Dai IC20 535 | Dai IC20 536 | Dai IC20 537 | Dai IC20 538 | Dai IC20 539 | Dai IC20 540 | Dai IC20 541 | Dai IC20 542 | Dai IC20 543 | Dai IC20 544 | Dai IC20 545 | Dai IC20 546 | Dai IC20 547 | Dai IC20 548 | Dai IC20 549 | Dai IC20 550 | Dai IC20 551 | Dai IC20 552 | Dai IC20 553 | Dai IC20 554 | Dai IC20 555 | Dai IC20 556 | Dai IC20 557 | Dai IC20 558 | Dai IC20 559 | Dai IC20 560 | Dai IC20 561 | Dai IC20 562 | Dai IC20 563 | Dai IC20 564 | Dai IC20 565 | Dai IC20 566 | Dai IC20 567 | Dai IC20 568 | Dai IC20 569 | Dai IC20 570 | Dai IC20 571 | Dai IC20 572 | Dai IC20 573 | Dai IC20 574 | Dai IC20 575 | Dai IC20 576 | Dai IC20 577 | Dai IC20 578 | Dai IC20 579 | Dai IC20 580 | Dai IC20 581 | Dai IC20 582 | Dai IC20 583 | Dai IC20 584 | Dai IC20 585 | Dai IC20 586 | Dai IC20 587 | Dai IC20 588 | Dai IC20 589 | Dai IC20 590 | Dai IC20 591 | Dai IC20 592 | Dai IC20 593 | Dai IC20 594 | Dai IC20 595 | Dai IC20 596 | Dai IC20 597 | Dai IC20 598 | Dai IC20 599 | Dai IC20 600 | Dai IC20 601 | Dai IC20 602 | Dai IC20 603 | Dai IC20 604 | Dai IC20 605 | Dai IC20 606 | Dai IC20 607 | Dai IC20 608 | Dai IC20 609 | Dai IC20 610 | Dai IC20 611 | Dai IC20 612 | Dai IC20 613 | Dai IC20 614 | Dai IC20 615 | Dai IC20 616 | Dai IC20 617 | Dai IC20 618 | Dai IC20 619 | Dai IC20 620 | Dai IC20 621 | Dai IC20 622 | Dai IC20 623 | Dai IC20 624 | Dai IC20 625 | Dai IC20 626 | Dai IC20 627 | Dai IC20 628 | Dai IC20 629 | Dai IC20 630 | Dai IC20 631 | Dai IC20 632 | Dai IC20 633 | Dai IC20 634 | Dai IC20 635 | Dai IC20 636 | Dai IC20 637 | Dai IC20 638 | Dai IC20 639 | Dai IC20 640 | Dai IC20 641 | Dai IC20 642 | Dai IC20 643 | Dai IC20 644 | Dai IC20 645 | Dai IC20 646 | Dai IC20 647 | Dai IC20 648 | Dai IC20 649 | Dai IC20 650 | Dai IC20 651 | Dai IC20 652 | Dai IC20 653 | Dai IC20 654 | Dai IC20 655 | Dai IC20 656 | Dai IC20 657 | Dai IC20 658 | Dai IC20 659 | Dai IC20 660 | Dai IC20 661 | Dai IC20 662 | Dai IC20 663 | Dai IC20 664 | Dai IC20 665 | Dai IC20 666 | Dai IC20 667 | Dai IC20 668 | Dai IC20 669 | Dai IC20 670 | Dai IC20 671 | Dai IC20 672 | Dai IC20 673 | Dai IC20 674 | Dai IC20 675 | Dai IC20 676 | Dai IC20 677 | Dai IC20 678 | Dai IC20 679 | Dai IC20 680 | Dai IC20 681 | Dai IC20 682 | Dai IC20 683 | Dai IC20 684 | Dai IC20 685 | Dai IC20 686 | Dai IC20 687 | Dai IC20 688 | Dai IC20 689 | Dai IC20 690 | Dai IC20 691 | Dai IC20 692 | Dai IC20 693 | Dai IC20 694 | Dai IC20 695 | Dai IC20 696 | Dai IC20 697 | Dai IC20 698 | Dai IC20 699 | Dai IC20 700 | Dai IC20 701 | Dai IC20 702 | Dai IC20 703 | Dai IC20 704 | Dai IC20 705 | Dai IC20 706 | Dai IC20 707 | Dai IC20 708 | Dai IC20 709 | Dai IC20 710 | Dai IC20 711 | Dai IC20 712 | Dai IC20 713 | Dai IC20 714 | Dai IC20 715 | Dai IC20 716 | Dai IC20 717 | Dai IC20 718 | Dai IC20 719 | Dai IC20 720 | Dai IC20 721 | Dai IC20 722 | Dai IC20 723 | Dai IC20 724 | Dai IC20 725 | Dai IC20 726 | Dai IC20 727 | Dai IC20 728 | Dai IC20 729 | Dai IC20 730 | Dai IC20 731 | Dai IC20 732 | Dai IC20 733 | Dai IC20 734 | Dai IC20 735 | Dai IC20 736 | Dai IC20 737 | Dai IC20 738 | Dai IC20 739 | Dai IC20 740 | Dai IC20 741 | Dai IC20 742 | Dai IC20 743 | Dai IC20 744 | Dai IC20 745 | Dai IC20 746 | Dai IC20 747 | Dai IC20 748 | Dai IC20 749 | Dai IC20 750 | Dai IC20 751 | Dai IC20 752 | Dai IC20 753 | Dai IC20 754 | Dai IC20 755 | Dai IC20 756 | Dai IC20 757 | Dai IC20 758 | Dai IC20 759 | Dai IC20 760 | Dai IC20 761 | Dai IC20 762 | Dai IC20 763 | Dai IC20 764 | Dai IC20 765 | Dai IC20 766 | Dai IC20 767 | Dai IC20 768 | Dai IC20 769 | Dai IC20 770 | Dai IC20 771 | Dai IC20 772 | Dai IC20 773 | Dai IC20 774 | Dai IC20 775 | Dai IC20 776 | Dai IC20 777 | Dai IC20 778 | Dai IC20 779 | Dai IC20 780 | Dai IC20 781 | Dai IC20 782 | Dai IC20 783 | Dai IC20 784 | Dai IC20 785 | Dai IC20 786 | Dai IC20 787 | Dai IC20 788 | Dai IC20 789 | Dai IC20 790 | Dai IC20 791 | Dai IC20 792 | Dai IC20 793 | Dai IC20 794 | Dai IC20 795 | Dai IC20 796 | Dai IC20 797 | Dai IC20 798 | Dai IC20 799 | Dai IC20 800 | Dai IC20 801 | Dai IC20 802 | Dai IC20 803 | Dai IC20 804 | Dai IC20 805 | Dai IC20 806 | Dai IC20 807 | Dai IC20 808 | Dai IC20 809 | Dai IC20 810 | Dai IC20 811 | Dai IC20 812 | Dai IC20 813 | Dai IC20 814 | Dai IC20 815 | Dai IC20 816 | Dai IC20 817 | Dai IC20 818 | Dai IC20 819 | Dai IC20 820 | Dai IC20 821 | Dai IC20 822 | Dai IC20 823 | Dai IC20 824 | Dai IC20 825 | Dai IC20 826 | Dai IC20 827 | Dai IC20 828 | Dai IC20 829 | Dai IC20 830 | Dai IC20 831 | Dai IC20 832 | Dai IC20 833 | Dai IC20 834 | Dai IC20 835 | Dai IC20 836 | Dai IC20 837 | Dai IC20 838 | Dai IC20 839 | Dai IC20 840 | Dai IC20 841 | Dai IC20 842 | Dai IC20 843 | Dai IC20 844 | Dai IC20 845 | Dai IC20 846 | Dai IC20 847 | Dai IC20 848 | Dai IC20 849 | Dai IC20 850 | Dai IC20 851 | Dai IC20 852 | Dai IC20 853 | Dai IC20 854 | Dai IC20 855 | Dai IC20 856 | Dai IC20 857 | Dai IC20 858 | Dai IC20 859 | Dai IC20 860 | Dai IC20 861 | Dai IC20 862 | Dai IC20 863 | Dai IC20 864 | Dai IC20 865 | Dai IC20 866 | Dai IC20 867 | Dai IC20 868 | Dai IC20 869 | Dai IC20 870 | Dai IC20 871 | Dai IC20 872 | Dai IC20 873 | Dai IC20 874 | Dai IC20 875 | Dai IC20 876 | Dai IC20 877 | Dai IC20 878 | Dai IC20 879 | Dai IC20 880 | Dai IC20 881 | Dai IC20 882 | Dai IC20 883 | Dai IC20 884 | Dai IC20 885 | Dai IC20 886 | Dai IC20 887 | Dai IC20 888 | Dai IC20 889 | Dai IC20 890 | Dai IC20 891 | Dai IC20 892 | Dai IC20 893 | Dai IC20 894 | Dai IC20 895 | Dai IC20 896 | Dai IC20 897 | Dai IC20 898 | Dai IC20 899 | Dai IC20 900 | Dai IC20 901 | Dai IC20 902 | Dai IC20 903 | Dai IC20 904 | Dai IC20 905 | Dai IC20 906 | Dai IC20 907 | Dai IC20 908 | Dai IC20 909 | Dai IC20 910 | Dai IC20 911 | Dai IC20 912 | Dai IC20 913 | Dai IC20 914 | Dai IC20 915 | Dai IC20 916 | Dai IC20 917 | Dai IC20 918 | Dai IC20 919 | Dai IC20 920 | Dai IC20 921 | Dai IC20 922 | Dai IC20 923 | Dai IC20 924 | Dai IC20 925 | Dai IC20 926 | Dai IC20 927 | Dai IC20 928 | Dai IC20 929 | Dai IC20 930 | Dai IC20 931 | Dai IC20 932 | Dai IC20 933 | Dai IC20 934 | Dai IC20 935 | Dai IC20 936 | Dai IC20 937 | Dai IC20 938 | Dai IC20 939 | Dai IC20 940 | Dai IC20 941 | Dai IC20 942 | Dai IC20 943 | Dai IC20 944 | Dai IC20 945 | Dai IC20 946 | Dai IC20 947 | Dai IC20 948 | Dai IC20 949 | Dai IC20 950 | Dai IC20 951 | Dai IC20 952 | Dai IC20 953 | Dai IC20 954 | Dai IC20 955 | Dai IC20 956 | Dai IC20 957 | Dai IC20 9 |
|--------------|--|---------|---------|---------|-------------|-------------|-------------|-------------|-------------|-------------|-------------|-------------|-------------|-------------|-------------|-------------|-------------|-------------|-------------|-------------|-------------|-------------|-------------|-------------|-------------|-------------|-------------|-------------|-------------|-------------|-------------|-------------|-------------|-------------|-------------|-------------|-------------|-------------|-------------|-------------|-------------|-------------|-------------|-------------|-------------|-------------|-------------|-------------|-------------|-------------|-------------|-------------|-------------|-------------|-------------|-------------|-------------|-------------|-------------|-------------|-------------|-------------|-------------|-------------|-------------|-------------|-------------|-------------|-------------|-------------|-------------|-------------|-------------|-------------|-------------|-------------|-------------|-------------|-------------|-------------|-------------|-------------|-------------|-------------|-------------|-------------|-------------|-------------|-------------|-------------|-------------|-------------|-------------|-------------|-------------|-------------|-------------|-------------|-------------|-------------|-------------|-------------|-------------|--------------|--------------|--------------|--------------|--------------|--------------|--------------|--------------|--------------|--------------|--------------|--------------|--------------|--------------|--------------|--------------|--------------|--------------|--------------|--------------|--------------|--------------|--------------|--------------|--------------|--------------|--------------|--------------|--------------|--------------|--------------|--------------|--------------|--------------|--------------|--------------|--------------|--------------|--------------|--------------|--------------|--------------|--------------|--------------|--------------|--------------|--------------|--------------|--------------|--------------|--------------|--------------|--------------|--------------|--------------|--------------|--------------|--------------|--------------|--------------|--------------|--------------|--------------|--------------|--------------|--------------|--------------|--------------|--------------|--------------|--------------|--------------|--------------|--------------|--------------|--------------|--------------|--------------|--------------|--------------|--------------|--------------|--------------|--------------|--------------|--------------|--------------|--------------|--------------|--------------|--------------|--------------|--------------|--------------|--------------|--------------|--------------|--------------|--------------|--------------|--------------|--------------|--------------|--------------|--------------|--------------|--------------|--------------|--------------|--------------|--------------|--------------|--------------|--------------|--------------|--------------|--------------|--------------|--------------|--------------|--------------|--------------|--------------|--------------|--------------|--------------|--------------|--------------|--------------|--------------|--------------|--------------|--------------|--------------|--------------|--------------|--------------|--------------|--------------|--------------|--------------|--------------|--------------|--------------|--------------|--------------|--------------|--------------|--------------|--------------|--------------|--------------|--------------|--------------|--------------|--------------|--------------|--------------|--------------|--------------|--------------|--------------|--------------|--------------|--------------|--------------|--------------|--------------|--------------|--------------|--------------|--------------|--------------|--------------|--------------|--------------|--------------|--------------|--------------|--------------|--------------|--------------|--------------|--------------|--------------|--------------|--------------|--------------|--------------|--------------|--------------|--------------|--------------|--------------|--------------|--------------|--------------|--------------|--------------|--------------|--------------|--------------|--------------|--------------|--------------|--------------|--------------|--------------|--------------|--------------|--------------|--------------|--------------|--------------|--------------|--------------|--------------|--------------|--------------|--------------|--------------|--------------|--------------|--------------|--------------|--------------|--------------|--------------|--------------|--------------|--------------|--------------|--------------|--------------|--------------|--------------|--------------|--------------|--------------|--------------|--------------|--------------|--------------|--------------|--------------|--------------|--------------|--------------|--------------|--------------|--------------|--------------|--------------|--------------|--------------|--------------|--------------|--------------|--------------|--------------|--------------|--------------|--------------|--------------|--------------|--------------|--------------|--------------|--------------|--------------|--------------|--------------|--------------|--------------|--------------|--------------|--------------|--------------|--------------|--------------|--------------|--------------|--------------|--------------|--------------|--------------|--------------|--------------|--------------|--------------|--------------|--------------|--------------|--------------|--------------|--------------|--------------|--------------|--------------|--------------|--------------|--------------|--------------|--------------|--------------|--------------|--------------|--------------|--------------|--------------|--------------|--------------|--------------|--------------|--------------|--------------|--------------|--------------|--------------|--------------|--------------|--------------|--------------|--------------|--------------|--------------|--------------|--------------|--------------|--------------|--------------|--------------|--------------|--------------|--------------|--------------|--------------|--------------|--------------|--------------|--------------|--------------|--------------|--------------|--------------|--------------|--------------|--------------|--------------|--------------|--------------|--------------|--------------|--------------|--------------|--------------|--------------|--------------|--------------|--------------|--------------|--------------|--------------|--------------|--------------|--------------|--------------|--------------|--------------|--------------|--------------|--------------|--------------|--------------|--------------|--------------|--------------|--------------|--------------|--------------|--------------|--------------|--------------|--------------|--------------|--------------|--------------|--------------|--------------|--------------|--------------|--------------|--------------|--------------|--------------|--------------|--------------|--------------|--------------|--------------|--------------|--------------|--------------|--------------|--------------|--------------|--------------|--------------|--------------|--------------|--------------|--------------|--------------|--------------|--------------|--------------|--------------|--------------|--------------|--------------|--------------|--------------|--------------|--------------|--------------|--------------|--------------|--------------|--------------|--------------|--------------|--------------|--------------|--------------|--------------|--------------|--------------|--------------|--------------|--------------|--------------|--------------|--------------|--------------|--------------|--------------|--------------|--------------|--------------|--------------|--------------|--------------|--------------|--------------|--------------|--------------|--------------|--------------|--------------|--------------|--------------|--------------|--------------|--------------|--------------|--------------|--------------|--------------|--------------|--------------|--------------|--------------|--------------|--------------|--------------|--------------|--------------|--------------|--------------|--------------|--------------|--------------|--------------|--------------|--------------|--------------|--------------|--------------|--------------|--------------|--------------|--------------|--------------|--------------|--------------|--------------|--------------|--------------|--------------|--------------|--------------|--------------|--------------|--------------|--------------|--------------|--------------|--------------|--------------|--------------|--------------|--------------|--------------|--------------|--------------|--------------|--------------|--------------|--------------|--------------|--------------|--------------|--------------|--------------|--------------|--------------|--------------|--------------|--------------|--------------|--------------|--------------|--------------|--------------|--------------|--------------|--------------|--------------|--------------|--------------|--------------|--------------|--------------|--------------|--------------|--------------|--------------|--------------|--------------|--------------|--------------|--------------|--------------|--------------|--------------|--------------|--------------|--------------|--------------|--------------|--------------|--------------|--------------|--------------|--------------|--------------|--------------|--------------|--------------|--------------|--------------|--------------|--------------|--------------|--------------|--------------|--------------|--------------|--------------|--------------|--------------|--------------|--------------|--------------|--------------|--------------|--------------|--------------|--------------|--------------|--------------|--------------|--------------|--------------|--------------|--------------|--------------|--------------|--------------|--------------|--------------|--------------|--------------|--------------|--------------|--------------|--------------|--------------|--------------|--------------|--------------|--------------|--------------|--------------|--------------|--------------|--------------|--------------|--------------|--------------|--------------|--------------|--------------|--------------|--------------|--------------|--------------|--------------|--------------|--------------|--------------|--------------|--------------|--------------|--------------|--------------|--------------|--------------|--------------|--------------|--------------|--------------|--------------|--------------|--------------|--------------|--------------|--------------|--------------|--------------|--------------|--------------|--------------|--------------|--------------|--------------|--------------|--------------|--------------|--------------|--------------|--------------|--------------|--------------|--------------|--------------|--------------|--------------|--------------|--------------|--------------|--------------|--------------|--------------|--------------|--------------|--------------|--------------|--------------|--------------|--------------|--------------|--------------|--------------|--------------|--------------|--------------|--------------|--------------|--------------|--------------|--------------|--------------|--------------|--------------|--------------|--------------|--------------|--------------|--------------|--------------|--------------|--------------|--------------|--------------|--------------|--------------|--------------|--------------|--------------|--------------|--------------|--------------|--------------|--------------|--------------|--------------|--------------|--------------|--------------|--------------|--------------|--------------|--------------|--------------|--------------|--------------|--------------|--------------|--------------|--------------|--------------|--------------|--------------|--------------|--------------|--------------|--------------|--------------|--------------|--------------|--------------|--------------|--------------|--------------|--------------|--------------|--------------|--------------|--------------|--------------|--------------|--------------|--------------|--------------|--------------|--------------|--------------|--------------|--------------|--------------|--------------|--------------|--------------|--------------|--------------|--------------|--------------|--------------|--------------|--------------|--------------|--------------|--------------|--------------|--------------|--------------|--------------|--------------|--------------|--------------|--------------|--------------|--------------|--------------|--------------|--------------|--------------|--------------|--------------|--------------|--------------|--------------|--------------|--------------|--------------|--------------|--------------|--------------|--------------|--------------|--------------|--------------|--------------|--------------|--------------|--------------|--------------|--------------|--------------|--------------|--------------|--------------|--------------|--------------|--------------|--------------|--------------|--------------|--------------|--------------|--------------|--------------|--------------|--------------|--------------|--------------|--------------|--------------|--------------|--------------|--------------|--------------|--------------|--------------|--------------|--------------|--------------|--------------|--------------|--------------|--------------|--------------|--------------|--------------|--------------|--------------|--------------|--------------|--------------|--------------|--------------|--------------|--------------|--------------|--------------|--------------|--------------|------------|
|--------------|--|---------|---------|---------|-------------|-------------|-------------|-------------|-------------|-------------|-------------|-------------|-------------|-------------|-------------|-------------|-------------|-------------|-------------|-------------|-------------|-------------|-------------|-------------|-------------|-------------|-------------|-------------|-------------|-------------|-------------|-------------|-------------|-------------|-------------|-------------|-------------|-------------|-------------|-------------|-------------|-------------|-------------|-------------|-------------|-------------|-------------|-------------|-------------|-------------|-------------|-------------|-------------|-------------|-------------|-------------|-------------|-------------|-------------|-------------|-------------|-------------|-------------|-------------|-------------|-------------|-------------|-------------|-------------|-------------|-------------|-------------|-------------|-------------|-------------|-------------|-------------|-------------|-------------|-------------|-------------|-------------|-------------|-------------|-------------|-------------|-------------|-------------|-------------|-------------|-------------|-------------|-------------|-------------|-------------|-------------|-------------|-------------|-------------|-------------|-------------|-------------|-------------|--------------|--------------|--------------|--------------|--------------|--------------|--------------|--------------|--------------|--------------|--------------|--------------|--------------|--------------|--------------|--------------|--------------|--------------|--------------|--------------|--------------|--------------|--------------|--------------|--------------|--------------|--------------|--------------|--------------|--------------|--------------|--------------|--------------|--------------|--------------|--------------|--------------|--------------|--------------|--------------|--------------|--------------|--------------|--------------|--------------|--------------|--------------|--------------|--------------|--------------|--------------|--------------|--------------|--------------|--------------|--------------|--------------|--------------|--------------|--------------|--------------|--------------|--------------|--------------|--------------|--------------|--------------|--------------|--------------|--------------|--------------|--------------|--------------|--------------|--------------|--------------|--------------|--------------|--------------|--------------|--------------|--------------|--------------|--------------|--------------|--------------|--------------|--------------|--------------|--------------|--------------|--------------|--------------|--------------|--------------|--------------|--------------|--------------|--------------|--------------|--------------|--------------|--------------|--------------|--------------|--------------|--------------|--------------|--------------|--------------|--------------|--------------|--------------|--------------|--------------|--------------|--------------|--------------|--------------|--------------|--------------|--------------|--------------|--------------|--------------|--------------|--------------|--------------|--------------|--------------|--------------|--------------|--------------|--------------|--------------|--------------|--------------|--------------|--------------|--------------|--------------|--------------|--------------|--------------|--------------|--------------|--------------|--------------|--------------|--------------|--------------|--------------|--------------|--------------|--------------|--------------|--------------|--------------|--------------|--------------|--------------|--------------|--------------|--------------|--------------|--------------|--------------|--------------|--------------|--------------|--------------|--------------|--------------|--------------|--------------|--------------|--------------|--------------|--------------|--------------|--------------|--------------|--------------|--------------|--------------|--------------|--------------|--------------|--------------|--------------|--------------|--------------|--------------|--------------|--------------|--------------|--------------|--------------|--------------|--------------|--------------|--------------|--------------|--------------|--------------|--------------|--------------|--------------|--------------|--------------|--------------|--------------|--------------|--------------|--------------|--------------|--------------|--------------|--------------|--------------|--------------|--------------|--------------|--------------|--------------|--------------|--------------|--------------|--------------|--------------|--------------|--------------|--------------|--------------|--------------|--------------|--------------|--------------|--------------|--------------|--------------|--------------|--------------|--------------|--------------|--------------|--------------|--------------|--------------|--------------|--------------|--------------|--------------|--------------|--------------|--------------|--------------|--------------|--------------|--------------|--------------|--------------|--------------|--------------|--------------|--------------|--------------|--------------|--------------|--------------|--------------|--------------|--------------|--------------|--------------|--------------|--------------|--------------|--------------|--------------|--------------|--------------|--------------|--------------|--------------|--------------|--------------|--------------|--------------|--------------|--------------|--------------|--------------|--------------|--------------|--------------|--------------|--------------|--------------|--------------|--------------|--------------|--------------|--------------|--------------|--------------|--------------|--------------|--------------|--------------|--------------|--------------|--------------|--------------|--------------|--------------|--------------|--------------|--------------|--------------|--------------|--------------|--------------|--------------|--------------|--------------|--------------|--------------|--------------|--------------|--------------|--------------|--------------|--------------|--------------|--------------|--------------|--------------|--------------|--------------|--------------|--------------|--------------|--------------|--------------|--------------|--------------|--------------|--------------|--------------|--------------|--------------|--------------|--------------|--------------|--------------|--------------|--------------|--------------|--------------|--------------|--------------|--------------|--------------|--------------|--------------|--------------|--------------|--------------|--------------|--------------|--------------|--------------|--------------|--------------|--------------|--------------|--------------|--------------|--------------|--------------|--------------|--------------|--------------|--------------|--------------|--------------|--------------|--------------|--------------|--------------|--------------|--------------|--------------|--------------|--------------|--------------|--------------|--------------|--------------|--------------|--------------|--------------|--------------|--------------|--------------|--------------|--------------|--------------|--------------|--------------|--------------|--------------|--------------|--------------|--------------|--------------|--------------|--------------|--------------|--------------|--------------|--------------|--------------|--------------|--------------|--------------|--------------|--------------|--------------|--------------|--------------|--------------|--------------|--------------|--------------|--------------|--------------|--------------|--------------|--------------|--------------|--------------|--------------|--------------|--------------|--------------|--------------|--------------|--------------|--------------|--------------|--------------|--------------|--------------|--------------|--------------|--------------|--------------|--------------|--------------|--------------|--------------|--------------|--------------|--------------|--------------|--------------|--------------|--------------|--------------|--------------|--------------|--------------|--------------|--------------|--------------|--------------|--------------|--------------|--------------|--------------|--------------|--------------|--------------|--------------|--------------|--------------|--------------|--------------|--------------|--------------|--------------|--------------|--------------|--------------|--------------|--------------|--------------|--------------|--------------|--------------|--------------|--------------|--------------|--------------|--------------|--------------|--------------|--------------|--------------|--------------|--------------|--------------|--------------|--------------|--------------|--------------|--------------|--------------|--------------|--------------|--------------|--------------|--------------|--------------|--------------|--------------|--------------|--------------|--------------|--------------|--------------|--------------|--------------|--------------|--------------|--------------|--------------|--------------|--------------|--------------|--------------|--------------|--------------|--------------|--------------|--------------|--------------|--------------|--------------|--------------|--------------|--------------|--------------|--------------|--------------|--------------|--------------|--------------|--------------|--------------|--------------|--------------|--------------|--------------|--------------|--------------|--------------|--------------|--------------|--------------|--------------|--------------|--------------|--------------|--------------|--------------|--------------|--------------|--------------|--------------|--------------|--------------|--------------|--------------|--------------|--------------|--------------|--------------|--------------|--------------|--------------|--------------|--------------|--------------|--------------|--------------|--------------|--------------|--------------|--------------|--------------|--------------|--------------|--------------|--------------|--------------|--------------|--------------|--------------|--------------|--------------|--------------|--------------|--------------|--------------|--------------|--------------|--------------|--------------|--------------|--------------|--------------|--------------|--------------|--------------|--------------|--------------|--------------|--------------|--------------|--------------|--------------|--------------|--------------|--------------|--------------|--------------|--------------|--------------|--------------|--------------|--------------|--------------|--------------|--------------|--------------|--------------|--------------|--------------|--------------|--------------|--------------|--------------|--------------|--------------|--------------|--------------|--------------|--------------|--------------|--------------|--------------|--------------|--------------|--------------|--------------|--------------|--------------|--------------|--------------|--------------|--------------|--------------|--------------|--------------|--------------|--------------|--------------|--------------|--------------|--------------|--------------|--------------|--------------|--------------|--------------|--------------|--------------|--------------|--------------|--------------|--------------|--------------|--------------|--------------|--------------|--------------|--------------|--------------|--------------|--------------|--------------|--------------|--------------|--------------|--------------|--------------|--------------|--------------|--------------|--------------|--------------|--------------|--------------|--------------|--------------|--------------|--------------|--------------|--------------|--------------|--------------|--------------|--------------|--------------|--------------|--------------|--------------|--------------|--------------|--------------|--------------|--------------|--------------|--------------|--------------|--------------|--------------|--------------|--------------|--------------|--------------|--------------|--------------|--------------|--------------|--------------|--------------|--------------|--------------|--------------|--------------|--------------|--------------|--------------|--------------|--------------|--------------|--------------|--------------|--------------|--------------|--------------|--------------|--------------|--------------|--------------|--------------|--------------|--------------|--------------|--------------|--------------|--------------|--------------|--------------|--------------|--------------|--------------|--------------|--------------|--------------|--------------|--------------|--------------|--------------|--------------|--------------|--------------|--------------|--------------|--------------|--------------|--------------|--------------|--------------|--------------|--------------|--------------|--------------|--------------|--------------|--------------|--------------|--------------|--------------|--------------|--------------|--------------|--------------|--------------|--------------|--------------|--------------|--------------|--------------|--------------|--------------|--------------|--------------|--------------|--------------|--------------|--------------|--------------|--------------|--------------|--------------|--------------|--------------|--------------|--------------|--------------|--------------|--------------|--------------|--------------|--------------|--------------|--------------|--------------|--------------|--------------|--------------|--------------|--------------|--------------|--------------|--------------|--------------|--------------|--------------|--------------|--------------|--------------|--------------|------------|





Supplementary Table S1. Overview on the abundance of all relatively quantified 1180 proteins

| Protein name |  | UniProt |  | control 01 |  | control 02 |  | control 03 |  | Dai IC20 01 |  | Dai IC20 02 |  | Dai IC20 03 |  | Dai IC20 04 |  | Dai IC20 05 |  | Dai IC20 06 |  | Dai IC20 07 |  | Dai IC20 08 |  | Dai IC20 09 |  | Dai IC20 10 |  | Dai IC20 11 |  | Dai IC20 12 |  | Dai IC20 13 |  | Dai IC20 14 |  | Dai IC20 15 |  | Dai IC20 16 |  | Dai IC20 17 |  | Dai IC20 18 |  | Dai IC20 19 |  | Dai IC20 20 |  | Dai IC20 21 |  | Dai IC20 22 |  | Dai IC20 23 |  | Dai IC20 24 |  | Dai IC20 25 |  | Dai IC20 26 |  | Dai IC20 27 |  | Dai IC20 28 |  | Dai IC20 29 |  | Dai IC20 30 |  | Dai IC20 31 |  | Dai IC20 32 |  | Dai IC20 33 |  | Dai IC20 34 |  | Dai IC20 35 |  | Dai IC20 36 |  | Dai IC20 37 |  | Dai IC20 38 |  | Dai IC20 39 |  | Dai IC20 40 |  | Dai IC20 41 |  | Dai IC20 42 |  | Dai IC20 43 |  | Dai IC20 44 |  | Dai IC20 45 |  | Dai IC20 46 |  | Dai IC20 47 |  | Dai IC20 48 |  | Dai IC20 49 |  | Dai IC20 50 |  | Dai IC20 51 |  | Dai IC20 52 |  | Dai IC20 53 |  | Dai IC20 54 |  | Dai IC20 55 |  | Dai IC20 56 |  | Dai IC20 57 |  | Dai IC20 58 |  | Dai IC20 59 |  | Dai IC20 60 |  | Dai IC20 61 |  | Dai IC20 62 |  | Dai IC20 63 |  | Dai IC20 64 |  | Dai IC20 65 |  | Dai IC20 66 |  | Dai IC20 67 |  | Dai IC20 68 |  | Dai IC20 69 |  | Dai IC20 70 |  | Dai IC20 71 |  | Dai IC20 72 |  | Dai IC20 73 |  | Dai IC20 74 |  | Dai IC20 75 |  | Dai IC20 76 |  | Dai IC20 77 |  | Dai IC20 78 |  | Dai IC20 79 |  | Dai IC20 80 |  | Dai IC20 81 |  | Dai IC20 82 |  | Dai IC20 83 |  | Dai IC20 84 |  | Dai IC20 85 |  | Dai IC20 86 |  | Dai IC20 87 |  | Dai IC20 88 |  | Dai IC20 89 |  | Dai IC20 90 |  | Dai IC20 91 |  | Dai IC20 92 |  | Dai IC20 93 |  | Dai IC20 94 |  | Dai IC20 95 |  | Dai IC20 96 |  | Dai IC20 97 |  | Dai IC20 98 |  | Dai IC20 99 |  | Dai IC20 100 |  | Dai IC20 101 |  | Dai IC20 102 |  | Dai IC20 103 |  | Dai IC20 104 |  | Dai IC20 105 |  | Dai IC20 106 |  | Dai IC20 107 |  | Dai IC20 108 |  | Dai IC20 109 |  | Dai IC20 110 |  | Dai IC20 111 |  | Dai IC20 112 |  | Dai IC20 113 |  | Dai IC20 114 |  | Dai IC20 115 |  | Dai IC20 116 |  | Dai IC20 117 |  | Dai IC20 118 |  | Dai IC20 119 |  | Dai IC20 120 |  | Dai IC20 121 |  | Dai IC20 122 |  | Dai IC20 123 |  | Dai IC20 124 |  | Dai IC20 125 |  | Dai IC20 126 |  | Dai IC20 127 |  | Dai IC20 128 |  | Dai IC20 129 |  | Dai IC20 130 |  | Dai IC20 131 |  | Dai IC20 132 |  | Dai IC20 133 |  | Dai IC20 134 |  | Dai IC20 135 |  | Dai IC20 136 |  | Dai IC20 137 |  | Dai IC20 138 |  | Dai IC20 139 |  | Dai IC20 140 |  | Dai IC20 141 |  | Dai IC20 142 |  | Dai IC20 143 |  | Dai IC20 144 |  | Dai IC20 145 |  | Dai IC20 146 |  | Dai IC20 147 |  | Dai IC20 148 |  | Dai IC20 149 |  | Dai IC20 150 |  | Dai IC20 151 |  | Dai IC20 152 |  | Dai IC20 153 |  | Dai IC20 154 |  | Dai IC20 155 |  | Dai IC20 156 |  | Dai IC20 157 |  | Dai IC20 158 |  | Dai IC20 159 |  | Dai IC20 160 |  | Dai IC20 161 |  | Dai IC20 162 |  | Dai IC20 163 |  | Dai IC20 164 |  | Dai IC20 165 |  | Dai IC20 166 |  | Dai IC20 167 |  | Dai IC20 168 |  | Dai IC20 169 |  | Dai IC20 170 |  | Dai IC20 171 |  | Dai IC20 172 |  | Dai IC20 173 |  | Dai IC20 174 |  | Dai IC20 175 |  | Dai IC20 176 |  | Dai IC20 177 |  | Dai IC20 178 |  | Dai IC20 179 |  | Dai IC20 180 |  | Dai IC20 181 |  | Dai IC20 182 |  | Dai IC20 183 |  | Dai IC20 184 |  | Dai IC20 185 |  | Dai IC20 186 |  | Dai IC20 187 |  | Dai IC20 188 |  | Dai IC20 189 |  | Dai IC20 190 |  | Dai IC20 191 |  | Dai IC20 192 |  | Dai IC20 193 |  | Dai IC20 194 |  | Dai IC20 195 |  | Dai IC20 196 |  | Dai IC20 197 |  | Dai IC20 198 |  | Dai IC20 199 |  | Dai IC20 200 |  | Dai IC20 201 |  | Dai IC20 202 |  | Dai IC20 203 |  | Dai IC20 204 |  | Dai IC20 205 |  | Dai IC20 206 |  | Dai IC20 207 |  | Dai IC20 208 |  | Dai IC20 209 |  | Dai IC20 210 |  | Dai IC20 211 |  | Dai IC20 212 |  | Dai IC20 213 |  | Dai IC20 214 |  | Dai IC20 215 |  | Dai IC20 216 |  | Dai IC20 217 |  | Dai IC20 218 |  | Dai IC20 219 |  | Dai IC20 220 |  | Dai IC20 221 |  | Dai IC20 222 |  | Dai IC20 223 |  | Dai IC20 224 |  | Dai IC20 225 |  | Dai IC20 226 |  | Dai IC20 227 |  | Dai IC20 228 |  | Dai IC20 229 |  | Dai IC20 230 |  | Dai IC20 231 |  | Dai IC20 232 |  | Dai IC20 233 |  | Dai IC20 234 |  | Dai IC20 235 |  | Dai IC20 236 |  | Dai IC20 237 |  | Dai IC20 238 |  | Dai IC20 239 |  | Dai IC20 240 |  | Dai IC20 241 |  | Dai IC20 242 |  | Dai IC20 243 |  | Dai IC20 244 |  | Dai IC20 245 |  | Dai IC20 246 |  | Dai IC20 247 |  | Dai IC20 248 |  | Dai IC20 249 |  | Dai IC20 250 |  | Dai IC20 251 |  | Dai IC20 252 |  | Dai IC20 253 |  | Dai IC20 254 |  | Dai IC20 255 |  | Dai IC20 256 |  | Dai IC20 257 |  | Dai IC20 258 |  | Dai IC20 259 |  | Dai IC20 260 |  | Dai IC20 261 |  | Dai IC20 262 |  | Dai IC20 263 |  | Dai IC20 264 |  | Dai IC20 265 |  | Dai IC20 266 |  | Dai IC20 267 |  | Dai IC20 268 |  | Dai IC20 269 |  | Dai IC20 270 |  | Dai IC20 271 |  | Dai IC20 272 |  | Dai IC20 273 |  | Dai IC20 274 |  | Dai IC20 275 |  | Dai IC20 276 |  | Dai IC20 277 |  | Dai IC20 278 |  | Dai IC20 279 |  | Dai IC20 280 |  | Dai IC20 281 |  | Dai IC20 282 |  | Dai IC20 283 |  | Dai IC20 284 |  | Dai IC20 285 |  | Dai IC20 286 |  | Dai IC20 287 |  | Dai IC20 288 |  | Dai IC20 289 |  | Dai IC20 290 |  | Dai IC20 291 |  | Dai IC20 292 |  | Dai IC20 293 |  | Dai IC20 294 |  | Dai IC20 295 |  | Dai IC20 296 |  | Dai IC20 297 |  | Dai IC20 298 |  | Dai IC20 299 |  | Dai IC20 300 |  | Dai IC20 301 |  | Dai IC20 302 |  | Dai IC20 303 |  | Dai IC20 304 |  | Dai IC20 305 |  | Dai IC20 306 |  | Dai IC20 307 |  | Dai IC20 308 |  | Dai IC20 309 |  | Dai IC20 310 |  | Dai IC20 311 |  | Dai IC20 312 |  | Dai IC20 313 |  | Dai IC20 314 |  | Dai IC20 315 |  | Dai IC20 316 |  | Dai IC20 317 |  | Dai IC20 318 |  | Dai IC20 319 |  | Dai IC20 320 |  | Dai IC20 321 |  | Dai IC20 322 |  | Dai IC20 323 |  | Dai IC20 324 |  | Dai IC20 325 |  | Dai IC20 326 |  | Dai IC20 327 |  | Dai IC20 328 |  | Dai IC20 329 |  | Dai IC20 330 |  | Dai IC20 331 |  | Dai IC20 332 |  | Dai IC20 333 |  | Dai IC20 334 |  | Dai IC20 335 |  | Dai IC20 336 |  | Dai IC20 337 |  | Dai IC20 338 |  | Dai IC20 339 |  | Dai IC20 340 |  | Dai IC20 341 |  | Dai IC20 342 |  | Dai IC20 343 |  | Dai IC20 344 |  | Dai IC20 345 |  | Dai IC20 346 |  | Dai IC20 347 |  | Dai IC20 348 |  | Dai IC20 349 |  | Dai IC20 350 |  | Dai IC20 351 |  | Dai IC20 352 |  | Dai IC20 353 |  | Dai IC20 354 |  | Dai IC20 355 |  | Dai IC20 356 |  | Dai IC20 357 |  | Dai IC20 358 |  | Dai IC20 359 |  | Dai IC20 360 |  | Dai IC20 361 |  | Dai IC20 362 |  | Dai IC20 363 |  | Dai IC20 364 |  | Dai IC20 365 |  | Dai IC20 366 |  | Dai IC20 367 |  | Dai IC20 368 |  | Dai IC20 369 |  | Dai IC20 370 |  | Dai IC20 371 |  | Dai IC20 372 |  | Dai IC20 373 |  | Dai IC20 374 |  | Dai IC20 375 |  | Dai IC20 376 |  | Dai IC20 377 |  | Dai IC20 378 |  | Dai IC20 379 |  | Dai IC20 380 |  | Dai IC20 381 |  | Dai IC20 382 |  | Dai IC20 383 |  | Dai IC20 38 |
|--------------|--|---------|--|------------|--|------------|--|------------|--|-------------|--|-------------|--|-------------|--|-------------|--|-------------|--|-------------|--|-------------|--|-------------|--|-------------|--|-------------|--|-------------|--|-------------|--|-------------|--|-------------|--|-------------|--|-------------|--|-------------|--|-------------|--|-------------|--|-------------|--|-------------|--|-------------|--|-------------|--|-------------|--|-------------|--|-------------|--|-------------|--|-------------|--|-------------|--|-------------|--|-------------|--|-------------|--|-------------|--|-------------|--|-------------|--|-------------|--|-------------|--|-------------|--|-------------|--|-------------|--|-------------|--|-------------|--|-------------|--|-------------|--|-------------|--|-------------|--|-------------|--|-------------|--|-------------|--|-------------|--|-------------|--|-------------|--|-------------|--|-------------|--|-------------|--|-------------|--|-------------|--|-------------|--|-------------|--|-------------|--|-------------|--|-------------|--|-------------|--|-------------|--|-------------|--|-------------|--|-------------|--|-------------|--|-------------|--|-------------|--|-------------|--|-------------|--|-------------|--|-------------|--|-------------|--|-------------|--|-------------|--|-------------|--|-------------|--|-------------|--|-------------|--|-------------|--|-------------|--|-------------|--|-------------|--|-------------|--|-------------|--|-------------|--|-------------|--|-------------|--|-------------|--|-------------|--|-------------|--|-------------|--|-------------|--|-------------|--|-------------|--|-------------|--|-------------|--|--------------|--|--------------|--|--------------|--|--------------|--|--------------|--|--------------|--|--------------|--|--------------|--|--------------|--|--------------|--|--------------|--|--------------|--|--------------|--|--------------|--|--------------|--|--------------|--|--------------|--|--------------|--|--------------|--|--------------|--|--------------|--|--------------|--|--------------|--|--------------|--|--------------|--|--------------|--|--------------|--|--------------|--|--------------|--|--------------|--|--------------|--|--------------|--|--------------|--|--------------|--|--------------|--|--------------|--|--------------|--|--------------|--|--------------|--|--------------|--|--------------|--|--------------|--|--------------|--|--------------|--|--------------|--|--------------|--|--------------|--|--------------|--|--------------|--|--------------|--|--------------|--|--------------|--|--------------|--|--------------|--|--------------|--|--------------|--|--------------|--|--------------|--|--------------|--|--------------|--|--------------|--|--------------|--|--------------|--|--------------|--|--------------|--|--------------|--|--------------|--|--------------|--|--------------|--|--------------|--|--------------|--|--------------|--|--------------|--|--------------|--|--------------|--|--------------|--|--------------|--|--------------|--|--------------|--|--------------|--|--------------|--|--------------|--|--------------|--|--------------|--|--------------|--|--------------|--|--------------|--|--------------|--|--------------|--|--------------|--|--------------|--|--------------|--|--------------|--|--------------|--|--------------|--|--------------|--|--------------|--|--------------|--|--------------|--|--------------|--|--------------|--|--------------|--|--------------|--|--------------|--|--------------|--|--------------|--|--------------|--|--------------|--|--------------|--|--------------|--|--------------|--|--------------|--|--------------|--|--------------|--|--------------|--|--------------|--|--------------|--|--------------|--|--------------|--|--------------|--|--------------|--|--------------|--|--------------|--|--------------|--|--------------|--|--------------|--|--------------|--|--------------|--|--------------|--|--------------|--|--------------|--|--------------|--|--------------|--|--------------|--|--------------|--|--------------|--|--------------|--|--------------|--|--------------|--|--------------|--|--------------|--|--------------|--|--------------|--|--------------|--|--------------|--|--------------|--|--------------|--|--------------|--|--------------|--|--------------|--|--------------|--|--------------|--|--------------|--|--------------|--|--------------|--|--------------|--|--------------|--|--------------|--|--------------|--|--------------|--|--------------|--|--------------|--|--------------|--|--------------|--|--------------|--|--------------|--|--------------|--|--------------|--|--------------|--|--------------|--|--------------|--|--------------|--|--------------|--|--------------|--|--------------|--|--------------|--|--------------|--|--------------|--|--------------|--|--------------|--|--------------|--|--------------|--|--------------|--|--------------|--|--------------|--|--------------|--|--------------|--|--------------|--|--------------|--|--------------|--|--------------|--|--------------|--|--------------|--|--------------|--|--------------|--|--------------|--|--------------|--|--------------|--|--------------|--|--------------|--|--------------|--|--------------|--|--------------|--|--------------|--|--------------|--|--------------|--|--------------|--|--------------|--|--------------|--|--------------|--|--------------|--|--------------|--|--------------|--|--------------|--|--------------|--|--------------|--|--------------|--|--------------|--|--------------|--|--------------|--|--------------|--|--------------|--|--------------|--|--------------|--|--------------|--|--------------|--|--------------|--|--------------|--|--------------|--|--------------|--|--------------|--|--------------|--|--------------|--|--------------|--|--------------|--|--------------|--|--------------|--|--------------|--|--------------|--|--------------|--|--------------|--|--------------|--|--------------|--|--------------|--|--------------|--|--------------|--|--------------|--|--------------|--|--------------|--|--------------|--|--------------|--|--------------|--|--------------|--|--------------|--|--------------|--|--------------|--|--------------|--|--------------|--|--------------|--|--------------|--|--------------|--|--------------|--|--------------|--|--------------|--|--------------|--|--------------|--|--------------|--|--------------|--|--------------|--|--------------|--|--------------|--|--------------|--|--------------|--|--------------|--|--------------|--|--------------|--|--------------|--|--------------|--|--------------|--|--------------|--|--------------|--|--------------|--|--------------|--|--------------|--|-------------|
|--------------|--|---------|--|------------|--|------------|--|------------|--|-------------|--|-------------|--|-------------|--|-------------|--|-------------|--|-------------|--|-------------|--|-------------|--|-------------|--|-------------|--|-------------|--|-------------|--|-------------|--|-------------|--|-------------|--|-------------|--|-------------|--|-------------|--|-------------|--|-------------|--|-------------|--|-------------|--|-------------|--|-------------|--|-------------|--|-------------|--|-------------|--|-------------|--|-------------|--|-------------|--|-------------|--|-------------|--|-------------|--|-------------|--|-------------|--|-------------|--|-------------|--|-------------|--|-------------|--|-------------|--|-------------|--|-------------|--|-------------|--|-------------|--|-------------|--|-------------|--|-------------|--|-------------|--|-------------|--|-------------|--|-------------|--|-------------|--|-------------|--|-------------|--|-------------|--|-------------|--|-------------|--|-------------|--|-------------|--|-------------|--|-------------|--|-------------|--|-------------|--|-------------|--|-------------|--|-------------|--|-------------|--|-------------|--|-------------|--|-------------|--|-------------|--|-------------|--|-------------|--|-------------|--|-------------|--|-------------|--|-------------|--|-------------|--|-------------|--|-------------|--|-------------|--|-------------|--|-------------|--|-------------|--|-------------|--|-------------|--|-------------|--|-------------|--|-------------|--|-------------|--|-------------|--|-------------|--|-------------|--|-------------|--|-------------|--|-------------|--|-------------|--|-------------|--|-------------|--|--------------|--|--------------|--|--------------|--|--------------|--|--------------|--|--------------|--|--------------|--|--------------|--|--------------|--|--------------|--|--------------|--|--------------|--|--------------|--|--------------|--|--------------|--|--------------|--|--------------|--|--------------|--|--------------|--|--------------|--|--------------|--|--------------|--|--------------|--|--------------|--|--------------|--|--------------|--|--------------|--|--------------|--|--------------|--|--------------|--|--------------|--|--------------|--|--------------|--|--------------|--|--------------|--|--------------|--|--------------|--|--------------|--|--------------|--|--------------|--|--------------|--|--------------|--|--------------|--|--------------|--|--------------|--|--------------|--|--------------|--|--------------|--|--------------|--|--------------|--|--------------|--|--------------|--|--------------|--|--------------|--|--------------|--|--------------|--|--------------|--|--------------|--|--------------|--|--------------|--|--------------|--|--------------|--|--------------|--|--------------|--|--------------|--|--------------|--|--------------|--|--------------|--|--------------|--|--------------|--|--------------|--|--------------|--|--------------|--|--------------|--|--------------|--|--------------|--|--------------|--|--------------|--|--------------|--|--------------|--|--------------|--|--------------|--|--------------|--|--------------|--|--------------|--|--------------|--|--------------|--|--------------|--|--------------|--|--------------|--|--------------|--|--------------|--|--------------|--|--------------|--|--------------|--|--------------|--|--------------|--|--------------|--|--------------|--|--------------|--|--------------|--|--------------|--|--------------|--|--------------|--|--------------|--|--------------|--|--------------|--|--------------|--|--------------|--|--------------|--|--------------|--|--------------|--|--------------|--|--------------|--|--------------|--|--------------|--|--------------|--|--------------|--|--------------|--|--------------|--|--------------|--|--------------|--|--------------|--|--------------|--|--------------|--|--------------|--|--------------|--|--------------|--|--------------|--|--------------|--|--------------|--|--------------|--|--------------|--|--------------|--|--------------|--|--------------|--|--------------|--|--------------|--|--------------|--|--------------|--|--------------|--|--------------|--|--------------|--|--------------|--|--------------|--|--------------|--|--------------|--|--------------|--|--------------|--|--------------|--|--------------|--|--------------|--|--------------|--|--------------|--|--------------|--|--------------|--|--------------|--|--------------|--|--------------|--|--------------|--|--------------|--|--------------|--|--------------|--|--------------|--|--------------|--|--------------|--|--------------|--|--------------|--|--------------|--|--------------|--|--------------|--|--------------|--|--------------|--|--------------|--|--------------|--|--------------|--|--------------|--|--------------|--|--------------|--|--------------|--|--------------|--|--------------|--|--------------|--|--------------|--|--------------|--|--------------|--|--------------|--|--------------|--|--------------|--|--------------|--|--------------|--|--------------|--|--------------|--|--------------|--|--------------|--|--------------|--|--------------|--|--------------|--|--------------|--|--------------|--|--------------|--|--------------|--|--------------|--|--------------|--|--------------|--|--------------|--|--------------|--|--------------|--|--------------|--|--------------|--|--------------|--|--------------|--|--------------|--|--------------|--|--------------|--|--------------|--|--------------|--|--------------|--|--------------|--|--------------|--|--------------|--|--------------|--|--------------|--|--------------|--|--------------|--|--------------|--|--------------|--|--------------|--|--------------|--|--------------|--|--------------|--|--------------|--|--------------|--|--------------|--|--------------|--|--------------|--|--------------|--|--------------|--|--------------|--|--------------|--|--------------|--|--------------|--|--------------|--|--------------|--|--------------|--|--------------|--|--------------|--|--------------|--|--------------|--|--------------|--|--------------|--|--------------|--|--------------|--|--------------|--|--------------|--|--------------|--|--------------|--|--------------|--|--------------|--|--------------|--|--------------|--|--------------|--|--------------|--|--------------|--|--------------|--|--------------|--|--------------|--|--------------|--|--------------|--|--------------|--|--------------|--|--------------|--|--------------|--|--------------|--|--------------|--|--------------|--|--------------|--|--------------|--|--------------|--|--------------|--|--------------|--|--------------|--|--------------|--|--------------|--|-------------|



Supplementary Table S1. Overview on the abundance of all relatively enriched 5180 proteins

| Protein name |                                       | UniProt | control | 01  | 02  | 03  | 04  | 05  | 06  | 07  | 08  | 09  | 10  | 11  | 12  | 13  | 14  | 15  | 16  | 17  | 18  | 19  | 20  | 21  | 22  | 23  | 24  | 25  | 26  | 27  | 28  | 29  | 30  | 31  | 32  | 33  | 34  | 35  | 36  | 37  | 38  | 39  | 40  | 41  | 42  | 43  | 44  | 45  | 46  | 47  | 48  | 49  | 50  | 51  | 52  | 53  | 54  | 55  | 56  | 57  | 58  | 59  | 60  | 61  | 62  | 63  | 64  | 65  | 66  | 67  | 68  | 69  | 70  | 71  | 72  | 73  | 74  | 75  | 76  | 77  | 78  | 79  | 80  | 81  | 82  | 83  | 84  | 85  | 86  | 87  | 88  | 89  | 90  | 91  | 92  | 93  | 94  | 95  | 96  | 97  | 98  | 99  | 100 | unique to MCF-7 | unique to MDAMB-231 |     |     |     |     |     |     |     |     |     |     |     |     |     |     |     |     |     |     |     |     |     |     |     |     |     |     |     |     |     |     |     |     |     |     |     |     |     |     |     |     |     |     |     |     |     |     |     |     |     |     |     |     |     |     |     |     |     |     |     |     |     |     |     |     |     |     |     |     |     |     |     |     |     |     |     |     |     |     |     |     |     |     |     |     |     |     |     |     |     |     |     |     |     |     |     |     |     |     |     |     |     |     |     |     |     |     |     |     |     |     |     |     |     |     |     |     |     |     |     |     |     |     |     |     |     |     |     |     |     |     |     |     |     |     |     |     |     |     |     |     |     |     |     |     |     |     |     |     |     |     |     |     |     |     |     |     |     |     |     |     |     |     |     |     |     |     |     |     |     |     |     |     |     |     |     |     |     |     |     |     |     |     |     |     |     |     |     |     |     |     |     |     |     |     |     |     |     |     |     |     |     |     |     |     |     |     |     |     |     |     |     |     |     |     |     |     |     |     |     |     |     |     |     |     |     |     |     |     |     |     |     |     |     |     |     |     |     |     |     |     |     |     |     |     |     |     |     |     |     |     |     |     |     |     |     |     |     |     |     |     |     |     |     |     |     |     |     |     |     |     |     |     |     |     |     |     |     |     |     |     |     |     |     |     |     |     |     |     |     |     |     |     |     |     |     |     |     |     |     |     |     |     |     |     |     |     |     |     |     |     |     |     |     |     |     |     |     |     |     |     |     |     |     |     |     |     |     |     |     |     |     |     |     |     |     |     |     |     |     |     |     |     |     |     |     |     |     |     |     |     |     |     |     |     |     |     |     |     |     |     |     |     |     |     |     |     |     |     |     |     |     |     |     |     |     |     |     |     |     |     |     |     |     |     |     |     |     |     |     |     |     |     |     |     |     |     |     |     |     |     |     |     |     |     |     |     |     |     |     |     |     |     |     |     |     |     |     |     |     |     |     |     |     |     |     |     |     |     |     |     |     |     |     |     |     |     |     |     |     |     |     |     |     |     |     |     |     |     |     |     |     |     |     |     |     |     |     |     |     |     |     |     |     |     |     |     |     |     |     |     |     |     |     |     |     |     |     |     |     |     |     |     |     |     |     |     |     |     |     |     |     |     |     |     |     |     |     |     |     |     |     |     |     |     |     |     |     |     |     |     |     |     |     |     |     |     |     |     |     |     |     |     |     |     |     |     |     |     |     |     |     |     |     |     |     |     |     |     |     |     |     |     |     |     |     |     |     |     |     |     |     |     |     |     |     |     |     |     |     |     |     |     |     |     |     |     |     |     |     |     |     |     |     |     |     |     |     |     |     |     |     |     |     |     |     |     |     |     |     |     |     |     |     |     |     |     |     |     |     |     |     |     |     |     |     |     |     |     |     |     |     |     |     |     |     |     |     |     |     |     |     |     |     |     |     |     |     |     |     |     |     |     |     |     |     |     |     |     |     |     |     |     |     |     |     |     |     |     |     |     |     |     |     |     |     |     |     |     |     |     |     |     |     |     |     |     |     |     |     |     |     |     |     |     |     |     |     |     |     |     |     |     |     |     |     |     |     |     |     |     |     |     |     |     |     |     |     |     |     |     |     |     |     |     |     |     |     |     |     |     |     |     |     |     |     |     |     |     |     |     |     |     |     |     |     |     |     |     |     |     |     |     |     |     |     |     |     |     |     |     |     |     |     |     |     |     |     |     |     |     |     |     |     |     |     |     |     |     |     |     |     |     |     |     |     |     |     |     |     |     |     |     |     |     |     |     |     |     |     |     |     |     |     |     |     |     |     |     |     |     |     |     |     |     |     |     |     |     |     |     |     |     |     |     |     |     |     |     |     |     |     |     |     |     |     |     |     |     |     |     |     |     |     |     |     |     |     |     |     |     |     |     |     |     |     |     |     |     |     |     |     |     |     |     |     |     |     |     |     |     |     |     |     |     |     |     |     |     |     |     |     |     |     |     |     |     |     |     |     |     |     |     |     |     |     |     |     |     |     |     |     |     |     |     |     |     |     |     |     |     |     |     |     |     |     |     |     |     |     |     |     |     |     |     |     |     |     |     |     |     |     |     |     |     |     |     |     |     |     |     |     |     |     |     |     |     |     |     |     |     |     |     |     |     |     |     |     |     |     |     |     |     |     |     |     |     |     |     |     |     |     |     |     |     |     |     |     |     |     |  |
|--------------|---------------------------------------|---------|---------|-----|-----|-----|-----|-----|-----|-----|-----|-----|-----|-----|-----|-----|-----|-----|-----|-----|-----|-----|-----|-----|-----|-----|-----|-----|-----|-----|-----|-----|-----|-----|-----|-----|-----|-----|-----|-----|-----|-----|-----|-----|-----|-----|-----|-----|-----|-----|-----|-----|-----|-----|-----|-----|-----|-----|-----|-----|-----|-----|-----|-----|-----|-----|-----|-----|-----|-----|-----|-----|-----|-----|-----|-----|-----|-----|-----|-----|-----|-----|-----|-----|-----|-----|-----|-----|-----|-----|-----|-----|-----|-----|-----|-----|-----|-----|-----|-----|-----|-----|-----|-----------------|---------------------|-----|-----|-----|-----|-----|-----|-----|-----|-----|-----|-----|-----|-----|-----|-----|-----|-----|-----|-----|-----|-----|-----|-----|-----|-----|-----|-----|-----|-----|-----|-----|-----|-----|-----|-----|-----|-----|-----|-----|-----|-----|-----|-----|-----|-----|-----|-----|-----|-----|-----|-----|-----|-----|-----|-----|-----|-----|-----|-----|-----|-----|-----|-----|-----|-----|-----|-----|-----|-----|-----|-----|-----|-----|-----|-----|-----|-----|-----|-----|-----|-----|-----|-----|-----|-----|-----|-----|-----|-----|-----|-----|-----|-----|-----|-----|-----|-----|-----|-----|-----|-----|-----|-----|-----|-----|-----|-----|-----|-----|-----|-----|-----|-----|-----|-----|-----|-----|-----|-----|-----|-----|-----|-----|-----|-----|-----|-----|-----|-----|-----|-----|-----|-----|-----|-----|-----|-----|-----|-----|-----|-----|-----|-----|-----|-----|-----|-----|-----|-----|-----|-----|-----|-----|-----|-----|-----|-----|-----|-----|-----|-----|-----|-----|-----|-----|-----|-----|-----|-----|-----|-----|-----|-----|-----|-----|-----|-----|-----|-----|-----|-----|-----|-----|-----|-----|-----|-----|-----|-----|-----|-----|-----|-----|-----|-----|-----|-----|-----|-----|-----|-----|-----|-----|-----|-----|-----|-----|-----|-----|-----|-----|-----|-----|-----|-----|-----|-----|-----|-----|-----|-----|-----|-----|-----|-----|-----|-----|-----|-----|-----|-----|-----|-----|-----|-----|-----|-----|-----|-----|-----|-----|-----|-----|-----|-----|-----|-----|-----|-----|-----|-----|-----|-----|-----|-----|-----|-----|-----|-----|-----|-----|-----|-----|-----|-----|-----|-----|-----|-----|-----|-----|-----|-----|-----|-----|-----|-----|-----|-----|-----|-----|-----|-----|-----|-----|-----|-----|-----|-----|-----|-----|-----|-----|-----|-----|-----|-----|-----|-----|-----|-----|-----|-----|-----|-----|-----|-----|-----|-----|-----|-----|-----|-----|-----|-----|-----|-----|-----|-----|-----|-----|-----|-----|-----|-----|-----|-----|-----|-----|-----|-----|-----|-----|-----|-----|-----|-----|-----|-----|-----|-----|-----|-----|-----|-----|-----|-----|-----|-----|-----|-----|-----|-----|-----|-----|-----|-----|-----|-----|-----|-----|-----|-----|-----|-----|-----|-----|-----|-----|-----|-----|-----|-----|-----|-----|-----|-----|-----|-----|-----|-----|-----|-----|-----|-----|-----|-----|-----|-----|-----|-----|-----|-----|-----|-----|-----|-----|-----|-----|-----|-----|-----|-----|-----|-----|-----|-----|-----|-----|-----|-----|-----|-----|-----|-----|-----|-----|-----|-----|-----|-----|-----|-----|-----|-----|-----|-----|-----|-----|-----|-----|-----|-----|-----|-----|-----|-----|-----|-----|-----|-----|-----|-----|-----|-----|-----|-----|-----|-----|-----|-----|-----|-----|-----|-----|-----|-----|-----|-----|-----|-----|-----|-----|-----|-----|-----|-----|-----|-----|-----|-----|-----|-----|-----|-----|-----|-----|-----|-----|-----|-----|-----|-----|-----|-----|-----|-----|-----|-----|-----|-----|-----|-----|-----|-----|-----|-----|-----|-----|-----|-----|-----|-----|-----|-----|-----|-----|-----|-----|-----|-----|-----|-----|-----|-----|-----|-----|-----|-----|-----|-----|-----|-----|-----|-----|-----|-----|-----|-----|-----|-----|-----|-----|-----|-----|-----|-----|-----|-----|-----|-----|-----|-----|-----|-----|-----|-----|-----|-----|-----|-----|-----|-----|-----|-----|-----|-----|-----|-----|-----|-----|-----|-----|-----|-----|-----|-----|-----|-----|-----|-----|-----|-----|-----|-----|-----|-----|-----|-----|-----|-----|-----|-----|-----|-----|-----|-----|-----|-----|-----|-----|-----|-----|-----|-----|-----|-----|-----|-----|-----|-----|-----|-----|-----|-----|-----|-----|-----|-----|-----|-----|-----|-----|-----|-----|-----|-----|-----|-----|-----|-----|-----|-----|-----|-----|-----|-----|-----|-----|-----|-----|-----|-----|-----|-----|-----|-----|-----|-----|-----|-----|-----|-----|-----|-----|-----|-----|-----|-----|-----|-----|-----|-----|-----|-----|-----|-----|-----|-----|-----|-----|-----|-----|-----|-----|-----|-----|-----|-----|-----|-----|-----|-----|-----|-----|-----|-----|-----|-----|-----|-----|-----|-----|-----|-----|-----|-----|-----|-----|-----|-----|-----|-----|-----|-----|-----|-----|-----|-----|-----|-----|-----|-----|-----|-----|-----|-----|-----|-----|-----|-----|-----|-----|-----|-----|-----|-----|-----|-----|-----|-----|-----|-----|-----|-----|-----|-----|-----|-----|-----|-----|-----|-----|-----|-----|-----|-----|-----|-----|-----|-----|-----|-----|-----|-----|-----|-----|-----|-----|-----|-----|-----|-----|-----|-----|-----|-----|-----|-----|-----|-----|-----|-----|-----|-----|-----|-----|-----|-----|-----|-----|-----|-----|-----|-----|-----|-----|-----|-----|-----|-----|-----|-----|-----|-----|-----|-----|-----|-----|-----|-----|-----|-----|-----|-----|-----|-----|-----|-----|-----|-----|-----|-----|-----|-----|-----|-----|-----|-----|-----|-----|-----|-----|-----|-----|-----|-----|-----|-----|-----|-----|-----|-----|-----|-----|-----|-----|-----|-----|-----|-----|-----|-----|-----|-----|-----|-----|-----|-----|-----|-----|-----|-----|-----|-----|-----|-----|-----|-----|-----|-----|-----|-----|-----|-----|-----|-----|-----|-----|-----|-----|-----|-----|-----|-----|-----|-----|-----|-----|-----|-----|-----|-----|-----|-----|-----|-----|-----|-----|-----|-----|-----|-----|-----|-----|-----|-----|-----|-----|-----|-----|-----|-----|-----|-----|-----|-----|-----|-----|-----|-----|-----|-----|-----|-----|-----|-----|-----|-----|-----|-----|-----|-----|-----|-----|-----|-----|-----|-----|-----|-----|-----|-----|-----|-----|-----|-----|-----|-----|-----|-----|-----|-----|-----|-----|-----|-----|-----|-----|-----|-----|-----|-----|-----|-----|-----|-----|-----|-----|-----|-----|-----|-----|-----|-----|-----|-----|-----|-----|--|
| 2231         | Interleukin-1 receptor subunit beta-1 | P42701  | 1.1     | 1.1 | 1.1 | 1.1 | 1.1 | 1.1 | 1.1 | 1.1 | 1.1 | 1.1 | 1.1 | 1.1 | 1.1 | 1.1 | 1.1 | 1.1 | 1.1 | 1.1 | 1.1 | 1.1 | 1.1 | 1.1 | 1.1 | 1.1 | 1.1 | 1.1 | 1.1 | 1.1 | 1.1 | 1.1 | 1.1 | 1.1 | 1.1 | 1.1 | 1.1 | 1.1 | 1.1 | 1.1 | 1.1 | 1.1 | 1.1 | 1.1 | 1.1 | 1.1 | 1.1 | 1.1 | 1.1 | 1.1 | 1.1 | 1.1 | 1.1 | 1.1 | 1.1 | 1.1 | 1.1 | 1.1 | 1.1 | 1.1 | 1.1 | 1.1 | 1.1 | 1.1 | 1.1 | 1.1 | 1.1 | 1.1 | 1.1 | 1.1 | 1.1 | 1.1 | 1.1 | 1.1 | 1.1 | 1.1 | 1.1 | 1.1 | 1.1 | 1.1 | 1.1 | 1.1 | 1.1 | 1.1 | 1.1 | 1.1 | 1.1 | 1.1 | 1.1 | 1.1 | 1.1 | 1.1 | 1.1 | 1.1 | 1.1 | 1.1 | 1.1 | 1.1 | 1.1 | 1.1 | 1.1 | 1.1 | 1.1 | 1.1             | 1.1                 | 1.1 | 1.1 | 1.1 | 1.1 | 1.1 | 1.1 | 1.1 | 1.1 | 1.1 | 1.1 | 1.1 | 1.1 | 1.1 | 1.1 | 1.1 | 1.1 | 1.1 | 1.1 | 1.1 | 1.1 | 1.1 | 1.1 | 1.1 | 1.1 | 1.1 | 1.1 | 1.1 | 1.1 | 1.1 | 1.1 | 1.1 | 1.1 | 1.1 | 1.1 | 1.1 | 1.1 | 1.1 | 1.1 | 1.1 | 1.1 | 1.1 | 1.1 | 1.1 | 1.1 | 1.1 | 1.1 | 1.1 | 1.1 | 1.1 | 1.1 | 1.1 | 1.1 | 1.1 | 1.1 | 1.1 | 1.1 | 1.1 | 1.1 | 1.1 | 1.1 | 1.1 | 1.1 | 1.1 | 1.1 | 1.1 | 1.1 | 1.1 | 1.1 | 1.1 | 1.1 | 1.1 | 1.1 | 1.1 | 1.1 | 1.1 | 1.1 | 1.1 | 1.1 | 1.1 | 1.1 | 1.1 | 1.1 | 1.1 | 1.1 | 1.1 | 1.1 | 1.1 | 1.1 | 1.1 | 1.1 | 1.1 | 1.1 | 1.1 | 1.1 | 1.1 | 1.1 | 1.1 | 1.1 | 1.1 | 1.1 | 1.1 | 1.1 | 1.1 | 1.1 | 1.1 | 1.1 | 1.1 | 1.1 | 1.1 | 1.1 | 1.1 | 1.1 | 1.1 | 1.1 | 1.1 | 1.1 | 1.1 | 1.1 | 1.1 | 1.1 | 1.1 | 1.1 | 1.1 | 1.1 | 1.1 | 1.1 | 1.1 | 1.1 | 1.1 | 1.1 | 1.1 | 1.1 | 1.1 | 1.1 | 1.1 | 1.1 | 1.1 | 1.1 | 1.1 | 1.1 | 1.1 | 1.1 | 1.1 | 1.1 | 1.1 | 1.1 | 1.1 | 1.1 | 1.1 | 1.1 | 1.1 | 1.1 | 1.1 | 1.1 | 1.1 | 1.1 | 1.1 | 1.1 | 1.1 | 1.1 | 1.1 | 1.1 | 1.1 | 1.1 | 1.1 | 1.1 | 1.1 | 1.1 | 1.1 | 1.1 | 1.1 | 1.1 | 1.1 | 1.1 | 1.1 | 1.1 | 1.1 | 1.1 | 1.1 | 1.1 | 1.1 | 1.1 | 1.1 | 1.1 | 1.1 | 1.1 | 1.1 | 1.1 | 1.1 | 1.1 | 1.1 | 1.1 | 1.1 | 1.1 | 1.1 | 1.1 | 1.1 | 1.1 | 1.1 | 1.1 | 1.1 | 1.1 | 1.1 | 1.1 | 1.1 | 1.1 | 1.1 | 1.1 | 1.1 | 1.1 | 1.1 | 1.1 | 1.1 | 1.1 | 1.1 | 1.1 | 1.1 | 1.1 | 1.1 | 1.1 | 1.1 | 1.1 | 1.1 | 1.1 | 1.1 | 1.1 | 1.1 | 1.1 | 1.1 | 1.1 | 1.1 | 1.1 | 1.1 | 1.1 | 1.1 | 1.1 | 1.1 | 1.1 | 1.1 | 1.1 | 1.1 | 1.1 | 1.1 | 1.1 | 1.1 | 1.1 | 1.1 | 1.1 | 1.1 | 1.1 | 1.1 | 1.1 | 1.1 | 1.1 | 1.1 | 1.1 | 1.1 | 1.1 | 1.1 | 1.1 | 1.1 | 1.1 | 1.1 | 1.1 | 1.1 | 1.1 | 1.1 | 1.1 | 1.1 | 1.1 | 1.1 | 1.1 | 1.1 | 1.1 | 1.1 | 1.1 | 1.1 | 1.1 | 1.1 | 1.1 | 1.1 | 1.1 | 1.1 | 1.1 | 1.1 | 1.1 | 1.1 | 1.1 | 1.1 | 1.1 | 1.1 | 1.1 | 1.1 | 1.1 | 1.1 | 1.1 | 1.1 | 1.1 | 1.1 | 1.1 | 1.1 | 1.1 | 1.1 | 1.1 | 1.1 | 1.1 | 1.1 | 1.1 | 1.1 | 1.1 | 1.1 | 1.1 | 1.1 | 1.1 | 1.1 | 1.1 | 1.1 | 1.1 | 1.1 | 1.1 | 1.1 | 1.1 | 1.1 | 1.1 | 1.1 | 1.1 | 1.1 | 1.1 | 1.1 | 1.1 | 1.1 | 1.1 | 1.1 | 1.1 | 1.1 | 1.1 | 1.1 | 1.1 | 1.1 | 1.1 | 1.1 | 1.1 | 1.1 | 1.1 | 1.1 | 1.1 | 1.1 | 1.1 | 1.1 | 1.1 | 1.1 | 1.1 | 1.1 | 1.1 | 1.1 | 1.1 | 1.1 | 1.1 | 1.1 | 1.1 | 1.1 | 1.1 | 1.1 | 1.1 | 1.1 | 1.1 | 1.1 | 1.1 | 1.1 | 1.1 | 1.1 | 1.1 | 1.1 | 1.1 | 1.1 | 1.1 | 1.1 | 1.1 | 1.1 | 1.1 | 1.1 | 1.1 | 1.1 | 1.1 | 1.1 | 1.1 | 1.1 | 1.1 | 1.1 | 1.1 | 1.1 | 1.1 | 1.1 | 1.1 | 1.1 | 1.1 | 1.1 | 1.1 | 1.1 | 1.1 | 1.1 | 1.1 | 1.1 | 1.1 | 1.1 | 1.1 | 1.1 | 1.1 | 1.1 | 1.1 | 1.1 | 1.1 | 1.1 | 1.1 | 1.1 | 1.1 | 1.1 | 1.1 | 1.1 | 1.1 | 1.1 | 1.1 | 1.1 | 1.1 | 1.1 | 1.1 | 1.1 | 1.1 | 1.1 | 1.1 | 1.1 | 1.1 | 1.1 | 1.1 | 1.1 | 1.1 | 1.1 | 1.1 | 1.1 | 1.1 | 1.1 | 1.1 | 1.1 | 1.1 | 1.1 | 1.1 | 1.1 | 1.1 | 1.1 | 1.1 | 1.1 | 1.1 | 1.1 | 1.1 | 1.1 | 1.1 | 1.1 | 1.1 | 1.1 | 1.1 | 1.1 | 1.1 | 1.1 | 1.1 | 1.1 | 1.1 | 1.1 | 1.1 | 1.1 | 1.1 | 1.1 | 1.1 | 1.1 | 1.1 | 1.1 | 1.1 | 1.1 | 1.1 | 1.1 | 1.1 | 1.1 | 1.1 | 1.1 | 1.1 | 1.1 | 1.1 | 1.1 | 1.1 | 1.1 | 1.1 | 1.1 | 1.1 | 1.1 | 1.1 | 1.1 | 1.1 | 1.1 | 1.1 | 1.1 | 1.1 | 1.1 | 1.1 | 1.1 | 1.1 | 1.1 | 1.1 | 1.1 | 1.1 | 1.1 | 1.1 | 1.1 | 1.1 | 1.1 | 1.1 | 1.1 | 1.1 | 1.1 | 1.1 | 1.1 | 1.1 | 1.1 | 1.1 | 1.1 | 1.1 | 1.1 | 1.1 | 1.1 | 1.1 | 1.1 | 1.1 | 1.1 | 1.1 | 1.1 | 1.1 | 1.1 | 1.1 | 1.1 | 1.1 | 1.1 | 1.1 | 1.1 | 1.1 | 1.1 | 1.1 | 1.1 | 1.1 | 1.1 | 1.1 | 1.1 | 1.1 | 1.1 | 1.1 | 1.1 | 1.1 | 1.1 | 1.1 | 1.1 | 1.1 | 1.1 | 1.1 | 1.1 | 1.1 | 1.1 | 1.1 | 1.1 | 1.1 | 1.1 | 1.1 | 1.1 | 1.1 | 1.1 | 1.1 | 1.1 | 1.1 | 1.1 | 1.1 | 1.1 | 1.1 | 1.1 | 1.1 | 1.1 | 1.1 | 1.1 | 1.1 | 1.1 | 1.1 | 1.1 | 1.1 | 1.1 | 1.1 | 1.1 | 1.1 | 1.1 | 1.1 | 1.1 | 1.1 | 1.1 | 1.1 | 1.1 | 1.1 | 1.1 | 1.1 | 1.1 | 1.1 | 1.1 | 1.1 | 1.1 | 1.1 | 1.1 | 1.1 | 1.1 | 1.1 | 1.1 | 1.1 | 1.1 | 1.1 | 1.1 | 1.1 | 1.1 | 1.1 | 1.1 | 1.1 | 1.1 | 1.1 | 1.1 | 1.1 | 1.1 | 1.1 | 1.1 | 1.1 | 1.1 | 1.1 | 1.1 | 1.1 | 1.1 | 1.1 | 1.1 | 1.1 | 1.1 | 1.1 | 1.1 | 1.1 | 1.1 | 1.1 | 1.1 | 1.1 | 1.1 | 1.1 | 1.1 | 1.1 | 1.1 | 1.1 | 1.1 | 1.1 | 1.1 | 1.1 | 1.1 | 1.1 | 1.1 | 1.1 | 1.1 | 1.1 | 1.1 | 1.1 | 1.1 | 1.1 | 1.1 | 1.1 | 1.1 | 1.1 | 1.1 | 1.1 | 1.1 | 1.1 | 1.1 | 1.1 | 1.1 | 1.1 | 1.1 | 1.1 | 1.1 | 1.1 | 1.1 | 1.1 | 1.1 | 1.1 | 1.1 | 1.1 | 1.1 | 1.1 | 1.1 | 1.1 | 1.1 | 1.1 | 1.1 | 1.1 | 1.1 | 1.1 | 1.1 | 1.1 | 1.1 | 1.1 | 1.1 | 1.1 | 1.1 | 1.1 | 1.1 | 1.1 | 1.1 | 1.1 | 1.1 | 1.1 | 1.1 | 1.1 | 1.1 | 1.1 | 1.1 | 1.1 | 1.1 | 1.1 | 1.1 | 1.1 | 1.1 | 1.1 | 1.1 | 1.1 | 1.1 | 1.1 | 1.1 | 1.1 | 1.1 | 1.1 | 1.1 | 1.1 | 1.1 | 1.1 | 1.1 | 1.1 | 1.1 | 1.1 | 1.1 | 1.1 | 1.1 | 1.1 | 1.1 | 1.1 | 1.1 | 1.1 | 1.1 | 1.1 | 1.1 | 1.1 | 1.1 | 1.1 | 1.1 | 1.1 | 1.1 | 1.1 | 1.1 | 1.1 | 1.1 | 1.1 | 1.1 | 1.1 | 1.1 | 1.1 | 1.1 | 1.1 | 1.1 | 1.1 | 1.1 | 1.1 | 1.1 | 1.1 | 1.1 | 1.1 | 1.1 | 1.1 | 1.1 | 1.1 | 1.1 | 1.1 | 1.1 | 1.1 | 1.1 | 1.1 | 1.1 | 1.1 | 1.1 | 1.1 | 1.1 | 1.1 | 1.1 | 1.1 | 1.1 | 1.1 | 1.1 | 1.1 | 1.1 | 1.1 | 1.1 | 1.1 | 1.1 | 1.1 | 1.1 | 1.1 | 1.1 | 1.1 | 1.1 | 1.1 | 1.1 | 1.1 | 1.1 | 1.1 | 1.1 | 1.1 | 1.1 | 1.1 | 1.1 | 1.1 | 1.1 | 1.1 | 1.1 | 1.1 | 1.1 | 1.1 | 1.1 | 1.1 | 1.1 | 1.1 | 1.1 | 1.1 | 1.1 | 1.1 | 1.1 | 1.1 | 1.1 | 1.1 | 1.1 | 1.1 | 1.1 | 1.1 | 1.1 | 1.1 | 1.1 | 1.1 | 1.1 | 1.1 | 1.1 | 1.1 | 1.1 | 1.1 | 1.1 | 1.1 | 1.1 | 1.1 | 1.1 | 1.1 | 1.1 | 1.1 | 1.1 | 1.1 | 1.1 | 1.1 | 1.1 | 1.1 | 1.1 | 1.1 | 1.1 | 1.1 | 1.1 | 1.1 | 1.1 | 1.1 | 1.1 | 1.1 | 1.1 | 1.1 | 1.1 | 1.1 | 1.1 | 1.1 | 1.1 | 1.1 | 1.1 | 1.1 | 1.1 | 1.1 | 1.1 | 1.1 | 1.1 | 1.1 | 1.1 | 1.1 | 1.1 | 1.1 | 1.1 | 1.1 | 1.1 | 1.1 | 1.1 | 1.1 | 1.1 | 1.1 | 1.1 | 1.1 | 1.1 | 1.1 | 1.1 | 1.1 | 1.1 | 1.1 | 1.1 | 1.1 | 1.1 | 1.1 | 1.1 | 1.1 | 1.1 | 1.1 | 1.1 | 1.1 | 1.1 | 1.1 | 1.1 | 1.1 | 1.1 | 1.1 | 1.1 | 1.1 | 1.1 | 1.1 | 1.1 | 1.1 | 1.1 | 1.1 | 1.1 | 1.1 | 1.1 | 1.1 | 1.1 | 1.1 | 1.1 | 1.1 | 1.1 | 1.1 | 1.1 | 1.1 | 1.1 | 1.1 | 1.1 | 1.1 | 1.1 | 1.1 | 1.1 | 1.1 | 1.1 | 1.1 | 1.1 |  |





Supplementary Table S1. Overview on the abundance of all relatively quantified 5180 proteins

| Protein | UniProt | Accession | Description | Control | Dai IC20 01 | Dai IC20 02 | Dai IC20 03 | Dai IC20 04 | Dai IC20 05 | Dai IC20 06 | Dai IC20 07 | Dai IC20 08 | Dai IC20 09 | Dai IC20 10 | Dai IC20 11 | Dai IC20 12 | Dai IC20 13 | Dai IC20 14 | Dai IC20 15 | Dai IC20 16 | Dai IC20 17 | Dai IC20 18 | Dai IC20 19 | Dai IC20 20 | Dai IC20 21 | Dai IC20 22 | Dai IC20 23 | Dai IC20 24 | Dai IC20 25 | Dai IC20 26 | Dai IC20 27 | Dai IC20 28 | Dai IC20 29 | Dai IC20 30 | Dai IC20 31 | Dai IC20 32 | Dai IC20 33 | Dai IC20 34 | Dai IC20 35 | Dai IC20 36 | Dai IC20 37 | Dai IC20 38 | Dai IC20 39 | Dai IC20 40 | Dai IC20 41 | Dai IC20 42 | Dai IC20 43 | Dai IC20 44 | Dai IC20 45 | Dai IC20 46 | Dai IC20 47 | Dai IC20 48 | Dai IC20 49 | Dai IC20 50 | Dai IC20 51 | Dai IC20 52 | Dai IC20 53 | Dai IC20 54 | Dai IC20 55 | Dai IC20 56 | Dai IC20 57 | Dai IC20 58 | Dai IC20 59 | Dai IC20 60 | Dai IC20 61 | Dai IC20 62 | Dai IC20 63 | Dai IC20 64 | Dai IC20 65 | Dai IC20 66 | Dai IC20 67 | Dai IC20 68 | Dai IC20 69 | Dai IC20 70 | Dai IC20 71 | Dai IC20 72 | Dai IC20 73 | Dai IC20 74 | Dai IC20 75 | Dai IC20 76 | Dai IC20 77 | Dai IC20 78 | Dai IC20 79 | Dai IC20 80 | Dai IC20 81 | Dai IC20 82 | Dai IC20 83 | Dai IC20 84 | Dai IC20 85 | Dai IC20 86 | Dai IC20 87 | Dai IC20 88 | Dai IC20 89 | Dai IC20 90 | Dai IC20 91 | Dai IC20 92 | Dai IC20 93 | Dai IC20 94 | Dai IC20 95 | Dai IC20 96 | Dai IC20 97 | Dai IC20 98 | Dai IC20 99 | Dai IC20 100 | Dai IC20 101 | Dai IC20 102 | Dai IC20 103 | Dai IC20 104 | Dai IC20 105 | Dai IC20 106 | Dai IC20 107 | Dai IC20 108 | Dai IC20 109 | Dai IC20 110 | Dai IC20 111 | Dai IC20 112 | Dai IC20 113 | Dai IC20 114 | Dai IC20 115 | Dai IC20 116 | Dai IC20 117 | Dai IC20 118 | Dai IC20 119 | Dai IC20 120 | Dai IC20 121 | Dai IC20 122 | Dai IC20 123 | Dai IC20 124 | Dai IC20 125 | Dai IC20 126 | Dai IC20 127 | Dai IC20 128 | Dai IC20 129 | Dai IC20 130 | Dai IC20 131 | Dai IC20 132 | Dai IC20 133 | Dai IC20 134 | Dai IC20 135 | Dai IC20 136 | Dai IC20 137 | Dai IC20 138 | Dai IC20 139 | Dai IC20 140 | Dai IC20 141 | Dai IC20 142 | Dai IC20 143 | Dai IC20 144 | Dai IC20 145 | Dai IC20 146 | Dai IC20 147 | Dai IC20 148 | Dai IC20 149 | Dai IC20 150 | Dai IC20 151 | Dai IC20 152 | Dai IC20 153 | Dai IC20 154 | Dai IC20 155 | Dai IC20 156 | Dai IC20 157 | Dai IC20 158 | Dai IC20 159 | Dai IC20 160 | Dai IC20 161 | Dai IC20 162 | Dai IC20 163 | Dai IC20 164 | Dai IC20 165 | Dai IC20 166 | Dai IC20 167 | Dai IC20 168 | Dai IC20 169 | Dai IC20 170 | Dai IC20 171 | Dai IC20 172 | Dai IC20 173 | Dai IC20 174 | Dai IC20 175 | Dai IC20 176 | Dai IC20 177 | Dai IC20 178 | Dai IC20 179 | Dai IC20 180 | Dai IC20 181 | Dai IC20 182 | Dai IC20 183 | Dai IC20 184 | Dai IC20 185 | Dai IC20 186 | Dai IC20 187 | Dai IC20 188 | Dai IC20 189 | Dai IC20 190 | Dai IC20 191 | Dai IC20 192 | Dai IC20 193 | Dai IC20 194 | Dai IC20 195 | Dai IC20 196 | Dai IC20 197 | Dai IC20 198 | Dai IC20 199 | Dai IC20 200 | Dai IC20 201 | Dai IC20 202 | Dai IC20 203 | Dai IC20 204 | Dai IC20 205 | Dai IC20 206 | Dai IC20 207 | Dai IC20 208 | Dai IC20 209 | Dai IC20 210 | Dai IC20 211 | Dai IC20 212 | Dai IC20 213 | Dai IC20 214 | Dai IC20 215 | Dai IC20 216 | Dai IC20 217 | Dai IC20 218 | Dai IC20 219 | Dai IC20 220 | Dai IC20 221 | Dai IC20 222 | Dai IC20 223 | Dai IC20 224 | Dai IC20 225 | Dai IC20 226 | Dai IC20 227 | Dai IC20 228 | Dai IC20 229 | Dai IC20 230 | Dai IC20 231 | Dai IC20 232 | Dai IC20 233 | Dai IC20 234 | Dai IC20 235 | Dai IC20 236 | Dai IC20 237 | Dai IC20 238 | Dai IC20 239 | Dai IC20 240 | Dai IC20 241 | Dai IC20 242 | Dai IC20 243 | Dai IC20 244 | Dai IC20 245 | Dai IC20 246 | Dai IC20 247 | Dai IC20 248 | Dai IC20 249 | Dai IC20 250 | Dai IC20 251 | Dai IC20 252 | Dai IC20 253 | Dai IC20 254 | Dai IC20 255 | Dai IC20 256 | Dai IC20 257 | Dai IC20 258 | Dai IC20 259 | Dai IC20 260 | Dai IC20 261 | Dai IC20 262 | Dai IC20 263 | Dai IC20 264 | Dai IC20 265 | Dai IC20 266 | Dai IC20 267 | Dai IC20 268 | Dai IC20 269 | Dai IC20 270 | Dai IC20 271 | Dai IC20 272 | Dai IC20 273 | Dai IC20 274 | Dai IC20 275 | Dai IC20 276 | Dai IC20 277 | Dai IC20 278 | Dai IC20 279 | Dai IC20 280 | Dai IC20 281 | Dai IC20 282 | Dai IC20 283 | Dai IC20 284 | Dai IC20 285 | Dai IC20 286 | Dai IC20 287 | Dai IC20 288 | Dai IC20 289 | Dai IC20 290 | Dai IC20 291 | Dai IC20 292 | Dai IC20 293 | Dai IC20 294 | Dai IC20 295 | Dai IC20 296 | Dai IC20 297 | Dai IC20 298 | Dai IC20 299 | Dai IC20 300 | Dai IC20 301 | Dai IC20 302 | Dai IC20 303 | Dai IC20 304 | Dai IC20 305 | Dai IC20 306 | Dai IC20 307 | Dai IC20 308 | Dai IC20 309 | Dai IC20 310 | Dai IC20 311 | Dai IC20 312 | Dai IC20 313 | Dai IC20 314 | Dai IC20 315 | Dai IC20 316 | Dai IC20 317 | Dai IC20 318 | Dai IC20 319 | Dai IC20 320 | Dai IC20 321 | Dai IC20 322 | Dai IC20 323 | Dai IC20 324 | Dai IC20 325 | Dai IC20 326 | Dai IC20 327 | Dai IC20 328 | Dai IC20 329 | Dai IC20 330 | Dai IC20 331 | Dai IC20 332 | Dai IC20 333 | Dai IC20 334 | Dai IC20 335 | Dai IC20 336 | Dai IC20 337 | Dai IC20 338 | Dai IC20 339 | Dai IC20 340 | Dai IC20 341 | Dai IC20 342 | Dai IC20 343 | Dai IC20 344 | Dai IC20 345 | Dai IC20 346 | Dai IC20 347 | Dai IC20 348 | Dai IC20 349 | Dai IC20 350 | Dai IC20 351 | Dai IC20 352 | Dai IC20 353 | Dai IC20 354 | Dai IC20 355 | Dai IC20 356 | Dai IC20 357 | Dai IC20 358 | Dai IC20 359 | Dai IC20 360 | Dai IC20 361 | Dai IC20 362 | Dai IC20 363 | Dai IC20 364 | Dai IC20 365 | Dai IC20 366 | Dai IC20 367 | Dai IC20 368 | Dai IC20 369 | Dai IC20 370 | Dai IC20 371 | Dai IC20 372 | Dai IC20 373 | Dai IC20 374 | Dai IC20 375 | Dai IC20 376 | Dai IC20 377 | Dai IC20 378 | Dai IC20 379 | Dai IC20 380 | Dai IC20 381 | Dai IC20 382 | Dai IC20 383 | Dai IC20 384 | Dai IC20 385 | Dai IC20 386 | Dai IC20 387 | Dai IC20 388 | Dai IC20 389 | Dai IC20 390 | Dai IC20 391 | Dai IC20 392 | Dai IC20 393 | Dai IC20 394 | Dai IC20 395 | Dai IC20 396 | Dai IC20 397 | Dai IC20 398 | Dai IC20 399 | Dai IC20 400 | Dai IC20 401 | Dai IC20 402 | Dai IC20 403 | Dai IC20 404 | Dai IC20 405 | Dai IC20 406 | Dai IC20 407 | Dai IC20 408 | Dai IC20 409 | Dai IC20 410 | Dai IC20 411 | Dai IC20 412 | Dai IC20 413 | Dai IC20 414 | Dai IC20 415 | Dai IC20 416 | Dai IC20 417 | Dai IC20 418 | Dai IC20 419 | Dai IC20 420 | Dai IC20 421 | Dai IC20 422 | Dai IC20 423 | Dai IC20 424 | Dai IC20 425 | Dai IC20 426 | Dai IC20 427 | Dai IC20 428 | Dai IC20 429 | Dai IC20 430 | Dai IC20 431 | Dai IC20 432 | Dai IC20 433 | Dai IC20 434 | Dai IC20 435 | Dai IC20 436 | Dai IC20 437 | Dai IC20 438 | Dai IC20 439 | Dai IC20 440 | Dai IC20 441 | Dai IC20 442 | Dai IC20 443 | Dai IC20 444 | Dai IC20 445 | Dai IC20 446 | Dai IC20 447 | Dai IC20 448 | Dai IC20 449 | Dai IC20 450 | Dai IC20 451 | Dai IC20 452 | Dai IC20 453 | Dai IC20 454 | Dai IC20 455 | Dai IC20 456 | Dai IC20 457 | Dai IC20 458 | Dai IC20 459 | Dai IC20 460 | Dai IC20 461 | Dai IC20 462 | Dai IC20 463 | Dai IC20 464 | Dai IC20 465 | Dai IC20 466 | Dai IC20 467 | Dai IC20 468 | Dai IC20 469 | Dai IC20 470 | Dai IC20 471 | Dai IC20 472 | Dai IC20 473 | Dai IC20 474 | Dai IC20 475 | Dai IC20 476 | Dai IC20 477 | Dai IC20 478 | Dai IC20 479 | Dai IC20 480 | Dai IC20 481 | Dai IC20 482 | Dai IC20 483 | Dai IC20 484 | Dai IC20 485 | Dai IC20 486 | Dai IC20 487 | Dai IC20 488 | Dai IC20 489 | Dai IC20 490 | Dai IC20 491 | Dai IC20 492 | Dai IC20 493 | Dai IC20 494 | Dai IC20 495 | Dai IC20 496 | Dai IC20 497 | Dai IC20 498 | Dai IC20 499 | Dai IC20 500 | Dai IC20 501 | Dai IC20 502 | Dai IC20 503 | Dai IC20 504 | Dai IC20 505 | Dai IC20 506 | Dai IC20 507 | Dai IC20 508 | Dai IC20 509 | Dai IC20 510 | Dai IC20 511 | Dai IC20 512 | Dai IC20 513 | Dai IC20 514 | Dai IC20 515 | Dai IC20 516 | Dai IC20 517 | Dai IC20 518 | Dai IC20 519 | Dai IC20 520 | Dai IC20 521 | Dai IC20 522 | Dai IC20 523 | Dai IC20 524 | Dai IC20 525 | Dai IC20 526 | Dai IC20 527 | Dai IC20 528 | Dai IC20 529 | Dai IC20 530 | Dai IC20 531 | Dai IC20 532 | Dai IC20 533 | Dai IC20 534 | Dai IC20 535 | Dai IC20 536 | Dai IC20 537 | Dai IC20 538 | Dai IC20 539 | Dai IC20 540 | Dai IC20 541 | Dai IC20 542 | Dai IC20 543 | Dai IC20 544 | Dai IC20 545 | Dai IC20 546 | Dai IC20 547 | Dai IC20 548 | Dai IC20 549 | Dai IC20 550 | Dai IC20 551 | Dai IC20 552 | Dai IC20 553 | Dai IC20 554 | Dai IC20 555 | Dai IC20 556 | Dai IC20 557 | Dai IC20 558 | Dai IC20 559 | Dai IC20 560 | Dai IC20 561 | Dai IC20 562 | Dai IC20 563 | Dai IC20 564 | Dai IC20 565 | Dai IC20 566 | Dai IC20 567 | Dai IC20 568 | Dai IC20 569 | Dai IC20 570 | Dai IC20 571 | Dai IC20 572 | Dai IC20 573 | Dai IC20 574 | Dai IC20 575 | Dai IC20 576 | Dai IC20 577 | Dai IC20 578 | Dai IC20 579 | Dai IC20 580 | Dai IC20 581 | Dai IC20 582 | Dai IC20 583 | Dai IC20 584 | Dai IC20 585 | Dai IC20 586 | Dai IC20 587 | Dai IC20 588 | Dai IC20 589 | Dai IC20 590 | Dai IC20 591 |
|---------|---------|-----------|-------------|---------|-------------|-------------|-------------|-------------|-------------|-------------|-------------|-------------|-------------|-------------|-------------|-------------|-------------|-------------|-------------|-------------|-------------|-------------|-------------|-------------|-------------|-------------|-------------|-------------|-------------|-------------|-------------|-------------|-------------|-------------|-------------|-------------|-------------|-------------|-------------|-------------|-------------|-------------|-------------|-------------|-------------|-------------|-------------|-------------|-------------|-------------|-------------|-------------|-------------|-------------|-------------|-------------|-------------|-------------|-------------|-------------|-------------|-------------|-------------|-------------|-------------|-------------|-------------|-------------|-------------|-------------|-------------|-------------|-------------|-------------|-------------|-------------|-------------|-------------|-------------|-------------|-------------|-------------|-------------|-------------|-------------|-------------|-------------|-------------|-------------|-------------|-------------|-------------|-------------|-------------|-------------|-------------|-------------|-------------|-------------|-------------|-------------|-------------|-------------|--------------|--------------|--------------|--------------|--------------|--------------|--------------|--------------|--------------|--------------|--------------|--------------|--------------|--------------|--------------|--------------|--------------|--------------|--------------|--------------|--------------|--------------|--------------|--------------|--------------|--------------|--------------|--------------|--------------|--------------|--------------|--------------|--------------|--------------|--------------|--------------|--------------|--------------|--------------|--------------|--------------|--------------|--------------|--------------|--------------|--------------|--------------|--------------|--------------|--------------|--------------|--------------|--------------|--------------|--------------|--------------|--------------|--------------|--------------|--------------|--------------|--------------|--------------|--------------|--------------|--------------|--------------|--------------|--------------|--------------|--------------|--------------|--------------|--------------|--------------|--------------|--------------|--------------|--------------|--------------|--------------|--------------|--------------|--------------|--------------|--------------|--------------|--------------|--------------|--------------|--------------|--------------|--------------|--------------|--------------|--------------|--------------|--------------|--------------|--------------|--------------|--------------|--------------|--------------|--------------|--------------|--------------|--------------|--------------|--------------|--------------|--------------|--------------|--------------|--------------|--------------|--------------|--------------|--------------|--------------|--------------|--------------|--------------|--------------|--------------|--------------|--------------|--------------|--------------|--------------|--------------|--------------|--------------|--------------|--------------|--------------|--------------|--------------|--------------|--------------|--------------|--------------|--------------|--------------|--------------|--------------|--------------|--------------|--------------|--------------|--------------|--------------|--------------|--------------|--------------|--------------|--------------|--------------|--------------|--------------|--------------|--------------|--------------|--------------|--------------|--------------|--------------|--------------|--------------|--------------|--------------|--------------|--------------|--------------|--------------|--------------|--------------|--------------|--------------|--------------|--------------|--------------|--------------|--------------|--------------|--------------|--------------|--------------|--------------|--------------|--------------|--------------|--------------|--------------|--------------|--------------|--------------|--------------|--------------|--------------|--------------|--------------|--------------|--------------|--------------|--------------|--------------|--------------|--------------|--------------|--------------|--------------|--------------|--------------|--------------|--------------|--------------|--------------|--------------|--------------|--------------|--------------|--------------|--------------|--------------|--------------|--------------|--------------|--------------|--------------|--------------|--------------|--------------|--------------|--------------|--------------|--------------|--------------|--------------|--------------|--------------|--------------|--------------|--------------|--------------|--------------|--------------|--------------|--------------|--------------|--------------|--------------|--------------|--------------|--------------|--------------|--------------|--------------|--------------|--------------|--------------|--------------|--------------|--------------|--------------|--------------|--------------|--------------|--------------|--------------|--------------|--------------|--------------|--------------|--------------|--------------|--------------|--------------|--------------|--------------|--------------|--------------|--------------|--------------|--------------|--------------|--------------|--------------|--------------|--------------|--------------|--------------|--------------|--------------|--------------|--------------|--------------|--------------|--------------|--------------|--------------|--------------|--------------|--------------|--------------|--------------|--------------|--------------|--------------|--------------|--------------|--------------|--------------|--------------|--------------|--------------|--------------|--------------|--------------|--------------|--------------|--------------|--------------|--------------|--------------|--------------|--------------|--------------|--------------|--------------|--------------|--------------|--------------|--------------|--------------|--------------|--------------|--------------|--------------|--------------|--------------|--------------|--------------|--------------|--------------|--------------|--------------|--------------|--------------|--------------|--------------|--------------|--------------|--------------|--------------|--------------|--------------|--------------|--------------|--------------|--------------|--------------|--------------|--------------|--------------|--------------|--------------|--------------|--------------|--------------|--------------|--------------|--------------|--------------|--------------|--------------|--------------|--------------|--------------|--------------|--------------|--------------|--------------|--------------|--------------|--------------|--------------|--------------|--------------|--------------|--------------|--------------|--------------|--------------|--------------|--------------|--------------|--------------|--------------|--------------|--------------|--------------|--------------|--------------|--------------|--------------|--------------|--------------|--------------|--------------|--------------|--------------|--------------|--------------|--------------|--------------|--------------|--------------|--------------|--------------|--------------|--------------|--------------|--------------|--------------|--------------|--------------|--------------|--------------|--------------|--------------|--------------|--------------|--------------|--------------|--------------|--------------|--------------|--------------|--------------|--------------|--------------|--------------|--------------|--------------|--------------|--------------|--------------|--------------|--------------|--------------|--------------|--------------|--------------|--------------|--------------|--------------|--------------|--------------|--------------|--------------|--------------|--------------|--------------|--------------|--------------|--------------|--------------|--------------|--------------|--------------|--------------|--------------|--------------|--------------|--------------|--------------|--------------|--------------|--------------|--------------|--------------|--------------|--------------|--------------|--------------|--------------|--------------|--------------|--------------|--------------|--------------|
|---------|---------|-----------|-------------|---------|-------------|-------------|-------------|-------------|-------------|-------------|-------------|-------------|-------------|-------------|-------------|-------------|-------------|-------------|-------------|-------------|-------------|-------------|-------------|-------------|-------------|-------------|-------------|-------------|-------------|-------------|-------------|-------------|-------------|-------------|-------------|-------------|-------------|-------------|-------------|-------------|-------------|-------------|-------------|-------------|-------------|-------------|-------------|-------------|-------------|-------------|-------------|-------------|-------------|-------------|-------------|-------------|-------------|-------------|-------------|-------------|-------------|-------------|-------------|-------------|-------------|-------------|-------------|-------------|-------------|-------------|-------------|-------------|-------------|-------------|-------------|-------------|-------------|-------------|-------------|-------------|-------------|-------------|-------------|-------------|-------------|-------------|-------------|-------------|-------------|-------------|-------------|-------------|-------------|-------------|-------------|-------------|-------------|-------------|-------------|-------------|-------------|-------------|-------------|--------------|--------------|--------------|--------------|--------------|--------------|--------------|--------------|--------------|--------------|--------------|--------------|--------------|--------------|--------------|--------------|--------------|--------------|--------------|--------------|--------------|--------------|--------------|--------------|--------------|--------------|--------------|--------------|--------------|--------------|--------------|--------------|--------------|--------------|--------------|--------------|--------------|--------------|--------------|--------------|--------------|--------------|--------------|--------------|--------------|--------------|--------------|--------------|--------------|--------------|--------------|--------------|--------------|--------------|--------------|--------------|--------------|--------------|--------------|--------------|--------------|--------------|--------------|--------------|--------------|--------------|--------------|--------------|--------------|--------------|--------------|--------------|--------------|--------------|--------------|--------------|--------------|--------------|--------------|--------------|--------------|--------------|--------------|--------------|--------------|--------------|--------------|--------------|--------------|--------------|--------------|--------------|--------------|--------------|--------------|--------------|--------------|--------------|--------------|--------------|--------------|--------------|--------------|--------------|--------------|--------------|--------------|--------------|--------------|--------------|--------------|--------------|--------------|--------------|--------------|--------------|--------------|--------------|--------------|--------------|--------------|--------------|--------------|--------------|--------------|--------------|--------------|--------------|--------------|--------------|--------------|--------------|--------------|--------------|--------------|--------------|--------------|--------------|--------------|--------------|--------------|--------------|--------------|--------------|--------------|--------------|--------------|--------------|--------------|--------------|--------------|--------------|--------------|--------------|--------------|--------------|--------------|--------------|--------------|--------------|--------------|--------------|--------------|--------------|--------------|--------------|--------------|--------------|--------------|--------------|--------------|--------------|--------------|--------------|--------------|--------------|--------------|--------------|--------------|--------------|--------------|--------------|--------------|--------------|--------------|--------------|--------------|--------------|--------------|--------------|--------------|--------------|--------------|--------------|--------------|--------------|--------------|--------------|--------------|--------------|--------------|--------------|--------------|--------------|--------------|--------------|--------------|--------------|--------------|--------------|--------------|--------------|--------------|--------------|--------------|--------------|--------------|--------------|--------------|--------------|--------------|--------------|--------------|--------------|--------------|--------------|--------------|--------------|--------------|--------------|--------------|--------------|--------------|--------------|--------------|--------------|--------------|--------------|--------------|--------------|--------------|--------------|--------------|--------------|--------------|--------------|--------------|--------------|--------------|--------------|--------------|--------------|--------------|--------------|--------------|--------------|--------------|--------------|--------------|--------------|--------------|--------------|--------------|--------------|--------------|--------------|--------------|--------------|--------------|--------------|--------------|--------------|--------------|--------------|--------------|--------------|--------------|--------------|--------------|--------------|--------------|--------------|--------------|--------------|--------------|--------------|--------------|--------------|--------------|--------------|--------------|--------------|--------------|--------------|--------------|--------------|--------------|--------------|--------------|--------------|--------------|--------------|--------------|--------------|--------------|--------------|--------------|--------------|--------------|--------------|--------------|--------------|--------------|--------------|--------------|--------------|--------------|--------------|--------------|--------------|--------------|--------------|--------------|--------------|--------------|--------------|--------------|--------------|--------------|--------------|--------------|--------------|--------------|--------------|--------------|--------------|--------------|--------------|--------------|--------------|--------------|--------------|--------------|--------------|--------------|--------------|--------------|--------------|--------------|--------------|--------------|--------------|--------------|--------------|--------------|--------------|--------------|--------------|--------------|--------------|--------------|--------------|--------------|--------------|--------------|--------------|--------------|--------------|--------------|--------------|--------------|--------------|--------------|--------------|--------------|--------------|--------------|--------------|--------------|--------------|--------------|--------------|--------------|--------------|--------------|--------------|--------------|--------------|--------------|--------------|--------------|--------------|--------------|--------------|--------------|--------------|--------------|--------------|--------------|--------------|--------------|--------------|--------------|--------------|--------------|--------------|--------------|--------------|--------------|--------------|--------------|--------------|--------------|--------------|--------------|--------------|--------------|--------------|--------------|--------------|--------------|--------------|--------------|--------------|--------------|--------------|--------------|--------------|--------------|--------------|--------------|--------------|--------------|--------------|--------------|--------------|--------------|--------------|--------------|--------------|--------------|--------------|--------------|--------------|--------------|--------------|--------------|--------------|--------------|--------------|--------------|--------------|--------------|--------------|--------------|--------------|--------------|--------------|--------------|--------------|--------------|--------------|--------------|--------------|--------------|--------------|--------------|--------------|--------------|--------------|--------------|--------------|--------------|--------------|--------------|--------------|--------------|--------------|--------------|--------------|--------------|--------------|--------------|--------------|--------------|--------------|--------------|--------------|--------------|--------------|--------------|--------------|

Supplementary Table S1. Overview on the abundance of all relatively quantified 5180 proteins

| Protein name | Uniprot | MCF-7 |  |  |  |  |  |  |  |  |  | MDA-MB-231 |  |  |  |  |  |  |  |  |  | control | control 01 | control 02 | control 03 | control 04 | control 05 | control 06 | control 07 | control 08 | control 09 | control 10 | control 11 | control 12 | control 13 | control 14 | control 15 | control 16 | control 17 | control 18 | control 19 | control 20 | control 21 | control 22 | control 23 | control 24 | control 25 | control 26 | control 27 | control 28 | control 29 | control 30 | control 31 | control 32 | control 33 | control 34 | control 35 | control 36 | control 37 | control 38 | control 39 | control 40 | control 41 | control 42 | control 43 | control 44 | control 45 | control 46 | control 47 | control 48 | control 49 | control 50 | control 51 | control 52 | control 53 | control 54 | control 55 | control 56 | control 57 | control 58 | control 59 | control 60 | control 61 | control 62 | control 63 | control 64 | control 65 | control 66 | control 67 | control 68 | control 69 | control 70 | control 71 | control 72 | control 73 | control 74 | control 75 | control 76 | control 77 | control 78 | control 79 | control 80 | control 81 | control 82 | control 83 | control 84 | control 85 | control 86 | control 87 | control 88 | control 89 | control 90 | control 91 | control 92 | control 93 | control 94 | control 95 | control 96 | control 97 | control 98 | control 99 | control 100 | control 101 | control 102 | control 103 | control 104 | control 105 | control 106 | control 107 | control 108 | control 109 | control 110 | control 111 | control 112 | control 113 | control 114 | control 115 | control 116 | control 117 | control 118 | control 119 | control 120 | control 121 | control 122 | control 123 | control 124 | control 125 | control 126 | control 127 | control 128 | control 129 | control 130 | control 131 | control 132 | control 133 | control 134 | control 135 | control 136 | control 137 | control 138 | control 139 | control 140 | control 141 | control 142 | control 143 | control 144 | control 145 | control 146 | control 147 | control 148 | control 149 | control 150 | control 151 | control 152 | control 153 | control 154 | control 155 | control 156 | control 157 | control 158 | control 159 | control 160 | control 161 | control 162 | control 163 | control 164 | control 165 | control 166 | control 167 | control 168 | control 169 | control 170 | control 171 | control 172 | control 173 | control 174 | control 175 | control 176 | control 177 | control 178 | control 179 | control 180 | control 181 | control 182 | control 183 | control 184 | control 185 | control 186 | control 187 | control 188 | control 189 | control 190 | control 191 | control 192 | control 193 | control 194 | control 195 | control 196 |
|--------------|---------|-------|--|--|--|--|--|--|--|--|--|------------|--|--|--|--|--|--|--|--|--|---------|------------|------------|------------|------------|------------|------------|------------|------------|------------|------------|------------|------------|------------|------------|------------|------------|------------|------------|------------|------------|------------|------------|------------|------------|------------|------------|------------|------------|------------|------------|------------|------------|------------|------------|------------|------------|------------|------------|------------|------------|------------|------------|------------|------------|------------|------------|------------|------------|------------|------------|------------|------------|------------|------------|------------|------------|------------|------------|------------|------------|------------|------------|------------|------------|------------|------------|------------|------------|------------|------------|------------|------------|------------|------------|------------|------------|------------|------------|------------|------------|------------|------------|------------|------------|------------|------------|------------|------------|------------|------------|------------|------------|------------|------------|------------|------------|------------|------------|------------|-------------|-------------|-------------|-------------|-------------|-------------|-------------|-------------|-------------|-------------|-------------|-------------|-------------|-------------|-------------|-------------|-------------|-------------|-------------|-------------|-------------|-------------|-------------|-------------|-------------|-------------|-------------|-------------|-------------|-------------|-------------|-------------|-------------|-------------|-------------|-------------|-------------|-------------|-------------|-------------|-------------|-------------|-------------|-------------|-------------|-------------|-------------|-------------|-------------|-------------|-------------|-------------|-------------|-------------|-------------|-------------|-------------|-------------|-------------|-------------|-------------|-------------|-------------|-------------|-------------|-------------|-------------|-------------|-------------|-------------|-------------|-------------|-------------|-------------|-------------|-------------|-------------|-------------|-------------|-------------|-------------|-------------|-------------|-------------|-------------|-------------|-------------|-------------|-------------|-------------|-------------|-------------|-------------|-------------|-------------|-------------|-------------|
|--------------|---------|-------|--|--|--|--|--|--|--|--|--|------------|--|--|--|--|--|--|--|--|--|---------|------------|------------|------------|------------|------------|------------|------------|------------|------------|------------|------------|------------|------------|------------|------------|------------|------------|------------|------------|------------|------------|------------|------------|------------|------------|------------|------------|------------|------------|------------|------------|------------|------------|------------|------------|------------|------------|------------|------------|------------|------------|------------|------------|------------|------------|------------|------------|------------|------------|------------|------------|------------|------------|------------|------------|------------|------------|------------|------------|------------|------------|------------|------------|------------|------------|------------|------------|------------|------------|------------|------------|------------|------------|------------|------------|------------|------------|------------|------------|------------|------------|------------|------------|------------|------------|------------|------------|------------|------------|------------|------------|------------|------------|------------|------------|------------|------------|------------|------------|-------------|-------------|-------------|-------------|-------------|-------------|-------------|-------------|-------------|-------------|-------------|-------------|-------------|-------------|-------------|-------------|-------------|-------------|-------------|-------------|-------------|-------------|-------------|-------------|-------------|-------------|-------------|-------------|-------------|-------------|-------------|-------------|-------------|-------------|-------------|-------------|-------------|-------------|-------------|-------------|-------------|-------------|-------------|-------------|-------------|-------------|-------------|-------------|-------------|-------------|-------------|-------------|-------------|-------------|-------------|-------------|-------------|-------------|-------------|-------------|-------------|-------------|-------------|-------------|-------------|-------------|-------------|-------------|-------------|-------------|-------------|-------------|-------------|-------------|-------------|-------------|-------------|-------------|-------------|-------------|-------------|-------------|-------------|-------------|-------------|-------------|-------------|-------------|-------------|-------------|-------------|-------------|-------------|-------------|-------------|-------------|-------------|

Supplementary Table S1. Overview on the abundance of all relatively quantified 5180 proteins

| Protein name                                                                      |         | MCF-7     |           | MDA-MB-231 |           |
|-----------------------------------------------------------------------------------|---------|-----------|-----------|------------|-----------|
| UniProt                                                                           | control | 01        | 02        | 01         | 02        |
| 2725 Myotubularin-related protein 4                                               | Q9YV44  | 27427.51  | 28238.22  | 26161.01   | 18097.27  |
| 2726 Myotubularin-related protein 3                                               | Q9YV43  | 6332.13   | 6995.27   | 5852.98    | 4489.29   |
| 2727 Myotubularin-related protein 8                                               | Q9Y216  | 12722.19  | 16753.06  | 13015.05   | 5751.91   |
| 2728 Myotubularin-related protein 7                                               | Q9E0F0  | 235.55    | 217.41    | 123.85     | 196.80    |
| 2729 Myristoylated alanine-rich C-kinase substrate                                | P29966  | 0.14      | 2.53      | 0.81       | 1.07      |
| 2730 NIG, NIG(dimethylarginine dimethylaminohydrolase 1                           | Q94760  | 0.14      | 2.53      | 0.81       | 1.07      |
| 2731 NIG, NIG(dimethylarginine dimethylaminohydrolase 2                           | Q95865  | 16370.82  | 16465.64  | 15716.44   | 9098.33   |
| 2732 N6-adenosine-methyltransferase catalytic subunit                             | Q8U444  | 162279.61 | 134842.27 | 113110.33  | 100099.58 |
| 2733 N6-adenosine-methyltransferase non-catalytic subunit                         | Q9HC65  | 0.14      | 2.53      | 0.81       | 1.07      |
| 2734 Naf-1(YH)+ exchange regulatory cofactor NHE-RF1                              | Q14745  | 636845.89 | 637495.61 | 604061.98  | 436745.50 |
| 2735 NAC-alpha-domain-containing protein 1                                        | O15069  | 16176.51  | 16218.62  | 13686.44   | 8085.51   |
| 2736 N-acetyl-D-glucosamine kinase                                                | Q9U070  | 47746.29  | 40601.31  | 37492.55   | 30983.49  |
| 2737 N-acetylglucosamine-6-sulfatase                                              | P15866  | 17664.47  | 15251.08  | 14375.99   | 12609.75  |
| 2738 NACHT domain- and WD repeat-containing protein 1                             | Q149M9  | 12106.68  | 10919.30  | 10343.90   | 72004.92  |
| 2739 NACHT_LRR and PYD domains-containing protein 13                              | Q8W250  | 0.14      | 2.53      | 0.81       | 1.07      |
| 2740 NACHT_LRR and PYD domains-containing protein 2                               | Q9W002  | 50394.85  | 44592.61  | 45319.07   | 34663.15  |
| 2741 NACHT_LRR and PYD domains-containing protein 3                               | Q9P620  | 0.14      | 2.53      | 0.81       | 1.07      |
| 2742 NACHT_LRR and PYD domains-containing protein 5                               | P59047  | 51891.13  | 52265.77  | 436929.25  | 36501.43  |
| 2743 NACHT_LRR and PYD domains-containing protein 7                               | Q8WX94  | 16944.32  | 15215.73  | 15079.93   | 15984.13  |
| 2744 NACHT_LRR and PYD domains-containing protein 9                               | Q7R70R  | 10570.47  | 10680.39  | 9993.33    | 7517.15   |
| 2745 N-acylneuraminate cytidyltransferase                                         | Q8HFW8  | 43971.86  | 41117.45  | 38821.78   | 31138.40  |
| 2746 N-acylneuraminate-2-phosphatase                                              | Q8T8E9  | 7155.58   | 6962.80   | 6658.76    | 4751.59   |
| 2747 NAD kinase 2, mitochondrial                                                  | C4G004  | 29273.99  | 28360.44  | 26884.81   | 20908.86  |
| 2748 NAD(P) transhydrogenase, mitochondrial                                       | Q13423  | 0.14      | 2.53      | 0.81       | 1.07      |
| 2749 NAD(P)H dehydrogenase [ubiquinol]                                            | P15559  | 144390.52 | 346579.18 | 316905.11  | 306750.23 |
| 2750 NAD(P)H-hydrate epimerase                                                    | Q8WCW5  | 14436.58  | 12518.78  | 12297.37   | 5906.16   |
| 2751 NAD-dependent malic enzyme, mitochondrial                                    | P23568  | 1083.44   | 1028.55   | 1099.45    | 658.06    |
| 2752 NAD-dependent protein deacetylase sirTun-5                                   | Q8W056  | 0.14      | 2.53      | 0.81       | 1.07      |
| 2753 NAD-dependent protein deacetylase sirTun-5, mitochondrial                    | Q9WKA8  | 4404.34   | 4379.89   | 36429.93   | 3149.93   |
| 2754 NADH dehydrogenase [ubiquinone] 1 alpha subcomplex assembly factor 2         | Q8N183  | 77722.12  | 75283.88  | 76265.03   | 53589.81  |
| 2755 NADH dehydrogenase [ubiquinone] 1 alpha subcomplex assembly factor 4         | Q9P032  | 35369.12  | 31299.58  | 32171.05   | 25763.42  |
| 2756 NADH dehydrogenase [ubiquinone] 1 alpha subcomplex subunit 10, mitochondrial | Q95299  | 29647.58  | 28941.43  | 25980.12   | 19709.62  |
| 2757 NADH dehydrogenase [ubiquinone] 1 alpha subcomplex subunit 11                | Q8W639  | 26283.83  | 27014.84  | 26784.85   | 15861.79  |
| 2758 NADH dehydrogenase [ubiquinone] 1 alpha subcomplex subunit 12                | Q9U009  | 7320.78   | 7283.84   | 6997.34    | 5544.63   |
| 2759 NADH dehydrogenase [ubiquinone] 1 alpha subcomplex subunit 13                | Q9P010  | 63158.74  | 65559.18  | 57875.85   | 43730.91  |
| 2760 NADH dehydrogenase [ubiquinone] 1 alpha subcomplex subunit 5                 | Q16718  | 64886.85  | 64472.09  | 60316.63   | 49071.93  |
| 2761 NADH dehydrogenase [ubiquinone] 1 alpha subcomplex subunit 6                 | P56556  | 6412.77   | 6221.05   | 5411.83    | 5179.36   |
| 2762 NADH dehydrogenase [ubiquinone] 1 alpha subcomplex subunit 7                 | O95182  | 146.37    | 244.54    | 375.95     | 167.63    |
| 2763 NADH dehydrogenase [ubiquinone] 1 alpha subcomplex subunit 8                 | P51970  | 18028.66  | 18825.14  | 16279.89   | 8550.18   |
| 2764 NADH dehydrogenase [ubiquinone] 1 alpha subcomplex subunit 9                 | Q16795  | 54908.99  | 53368.24  | 51134.40   | 36988.09  |
| 2765 NADH dehydrogenase [ubiquinone] 1 beta subcomplex subunit 10                 | Q96000  | 74624.41  | 71791.89  | 65054.34   | 49469.70  |
| 2766 NADH dehydrogenase [ubiquinone] 1 beta subcomplex subunit 11, mitochondrial  | Q9N914  | 2775.42   | 2999.28   | 2505.13    | 2599.25   |
| 2767 NADH dehydrogenase [ubiquinone] 1 beta subcomplex subunit 13                 | Q43676  | 3431.77   | 27469.86  | 19508.50   | 15633.37  |
| 2768 NADH dehydrogenase [ubiquinone] 1 beta subcomplex subunit 4                  | Q95168  | 49197.58  | 49632.26  | 46492.27   | 35781.46  |
| 2769 NADH dehydrogenase [ubiquinone] 1 beta subcomplex subunit 5, mitochondrial   | Q43674  | 32290.95  | 26850.59  | 20417.29   | 16780.08  |
| 2770 NADH dehydrogenase [ubiquinone] 1 beta subcomplex subunit 6                  | O95159  | 41489.52  | 37439.65  | 34766.54   | 26649.22  |
| 2771 NADH dehydrogenase [ubiquinone] 1 beta subcomplex subunit 7                  | P17568  | 39027.69  | 40020.73  | 38247.92   | 29867.49  |
| 2772 NADH dehydrogenase [ubiquinone] 1 beta subcomplex subunit 8, mitochondrial   | Q8W639  | 13107.48  | 10667.04  | 9237.58    | 7664.84   |
| 2773 NADH dehydrogenase [ubiquinone] 1 beta subcomplex subunit 9                  | Q9Y6M9  | 55135.50  | 51605.96  | 51164.65   | 35656.82  |
| 2774 NADH dehydrogenase [ubiquinone] 1 subunit C2                                 | Q95298  | 80571.88  | 77078.65  | 65810.14   | 35902.32  |
| 2775 NADH dehydrogenase [ubiquinone] flavoprotein 1, mitochondrial                | P19421  | 80962.41  | 82420.61  | 69779.47   | 52828.06  |
| 2776 NADH dehydrogenase [ubiquinone] flavoprotein 2, mitochondrial                | P19404  | 25598.84  | 23200.32  | 21188.68   | 17472.19  |
| 2777 NADH dehydrogenase [ubiquinone] iron-sulfur protein 2, mitochondrial         | Q75306  | 37817.05  | 35563.98  | 32911.77   | 24626.82  |
| 2778 NADH dehydrogenase [ubiquinone] iron-sulfur protein 3, mitochondrial         | Q75489  | 71234.74  | 64098.34  | 54199.14   | 29547.05  |
| 2779 NADH dehydrogenase [ubiquinone] iron-sulfur protein 4, mitochondrial         | Q43181  | 39865.69  | 38171.67  | 38057.14   | 24996.41  |
| 2780 NADH dehydrogenase [ubiquinone] iron-sulfur protein 5                        | Q43920  | 17034.38  | 15724.56  | 14749.06   | 11561.85  |
| 2781 NADH dehydrogenase [ubiquinone] iron-sulfur protein 6, mitochondrial         | Q75380  | 11816.55  | 10898.41  | 10727.03   | 9163.65   |
| 2782 NADH dehydrogenase [ubiquinone] iron-sulfur protein 8, mitochondrial         | Q00027  | 891624.28 | 920001.79 | 90684.87   | 78080.88  |
| 2783 NADH-cytochrome b5 reductase 3                                               | P00387  | 195128.83 | 180021.64 | 170480.89  | 127221.24 |
| 2784 NADH-cytochrome oxidoreductase 75 kDa subunit, mitochondrial                 | P28831  | 106693.65 | 100885.16 | 89294.65   | 76693.02  |
| 2785 NADH-ubiquinone oxidoreductase chain 4                                       | P03905  | 260700.84 | 25218.27  | 25213.33   | 17922.23  |
| 2786 NADP-dependent malic enzyme                                                  | P48163  | 72717.53  | 66665.54  | 59333.18   | 52843.14  |
| 2787 NADP-dependent malic enzyme, mitochondrial                                   | Q16798  | 546.43    | 396.22    | 435.72     | 19.28     |
| 2788 NADPH-dependent oxidoreductase, mitochondrial                                | P23570  | 65572.82  | 61247.92  | 57823.18   | 46798.82  |
| 2789 NADPH-cytochrome P450 reductase                                              | P16435  | 128233.53 | 125118.42 | 119292.97  | 101809.37 |
| 2790 N-alpha-acetyltransferase 10                                                 | P41227  | 283144.73 | 271138.53 | 289261.95  | 208961.34 |
| 2791 N-alpha-acetyltransferase 11                                                 | Q8W639  | 7945.27   | 6368.82   | 5681.82    | 4212.06   |
| 2792 N-alpha-acetyltransferase 15, Naa1 auxiliary subunit                         | Q9B9X9  | 278169.59 | 271248.73 | 261240.44  | 194351.10 |
| 2793 N-alpha-acetyltransferase 16, Naa1 auxiliary subunit                         | Q6W069  | 25804.61  | 22621.03  | 20936.95   | 18154.94  |
| 2794 N-alpha-acetyltransferase 20                                                 | P61599  | 1977.37   | 1680.08   | 1791.30    | 1160.73   |
| 2795 N-alpha-acetyltransferase 35, Naa1 auxiliary subunit                         | Q5VZ55  | 10133.59  | 9664.88   | 9331.54    | 7218.47   |
| 2796 N-alpha-acetyltransferase 40                                                 | P28419  | 436.31    | 436.31    | 445.02     | 445.02    |
| 2797 N-alpha-acetyltransferase 50                                                 | Q9GZ21  | 114275.96 | 118774.84 | 108085.99  | 77998.17  |
| 2798 N-alpha-acetyltransferase 55, Naa1 auxiliary subunit                         | EP9AV3  | 294661.87 | 286976.88 | 274515.50  | 193706.78 |
| 2799 N-alpha-acetyltransferase 56, Naa1 auxiliary subunit                         | Q9Y242  | 12146.92  | 12146.92  | 12146.92   | 12146.92  |
| 2800 Nck-associated protein 1                                                     | Q9Y247  | 28499.32  | 26934.39  | 24372.45   | 26481.63  |
| 2801 Nck-associated protein 3-like                                                | Q9HCH0  | 5643.36   | 5954.40   | 5380.48    | 4312.12   |
| 2802 Nucleitin                                                                    | U70641  | 41232.19  | 42619.80  | 39125.02   | 28677.94  |
| 2803 Nucleitin                                                                    | P20209  | 0.14      | 2.53      | 0.81       | 1.07      |
| 2804 Nucleitin-related anchoring protein                                          | Q8W677  | 118496.80 | 116577.71 | 105568.80  | 80834.69  |
| 2805 NEDD4-binding protein 1                                                      | Q75113  | 0.14      | 2.53      | 0.81       | 1.07      |
| 2806 NEDD4-binding protein 2                                                      | Q8WUW6  | 6546.67   | 6560.36   | 5419.23    | 4374.36   |
| 2807 NEDD8                                                                        | Q15843  | 31113.37  | 31182.37  | 28246.34   | 23859.25  |
| 2808 NEDD8-activating enzyme E1 catalytic subunit                                 | Q8T8C4  | 0.14      | 2.53      | 0.81       | 1.07      |
| 2809 NEDD8-activating enzyme E1 regulatory subunit                                | Q13564  | 298.90    | 367.37    | 308.38     | 332.65    |
| 2810 NEDD8-conjugating enzyme Ubc12                                               | P61081  | 46123.80  | 44061.40  | 42338.11   | 35307.43  |
| 2811 NEDD8-conjugating enzyme UBE2F                                               | Q969M7  | 30216.94  | 30029.94  | 26876.00   | 31018.43  |
| 2812 Negative elongation factor A                                                 | Q9H9P2  | 38077.70  | 37753.52  | 34025.30   | 28985.39  |
| 2813 Negative elongation factor B                                                 | Q8W9X2  | 16023.11  | 15271.87  | 13116.81   | 5426.75   |
| 2814 Nucleic acid elongation factor CD                                            | Q8W9X2  | 4899.49   | 4786.46   | 4457.66    | 3972.78   |
| 2815 Negative elongation factor E                                                 | P18615  | 34407.09  | 34457.59  | 31653.51   | 27405.19  |
| 2816 Nephrocystin-3                                                               | Q27244  | 6321.04   | 6724.51   | 6250.98    | 4120.68   |
| 2817 Nesprin                                                                      | Q8W691  | 362692.47 | 350770.92 | 326887.65  | 254764.48 |
| 2818 Nesprin                                                                      | Q8W691  | 101477.19 | 918527.02 | 817479.19  | 622062.12 |
| 2819 Nesprin                                                                      | P48681  | 240936.85 | 237933.93 | 191092.88  | 167580.52 |
| 2820 Nesprin receptor UNC5D                                                       | Q6U6Z4  | 5779.75   | 5461.67   | 4634.17    | 3579.09   |
| 2821 Neutrin                                                                      | Q9UMK5  | 0.14      | 2.53      | 0.81       | 1.07      |
| 2822 Neurial retrovirus-like zipper protein                                       | P54843  | 10333.50  | 9441.80   | 8998.88    | 4794.81   |
| 2823 Neurized-like protein 4                                                      | Q9UN86  | 4495.37   | 3933.60   | 4448.86    | 2854.92   |

Supplementary Table S1. Overview on the abundance of all relatively quantified 5180 proteins

[illegible]



Supplementary Table S1. Overview on the abundance of all relatively quantified 5180 proteins

| MCF-7 |         |         |         |         |          |          |          |          |          | MDA-MB-231 |          |          |          |          |          |          |          |          |          |          |          |          |          |          |          |          |          |          |          |          |          |          |          |          |          |          |          |          |          |          |          |          |          |          |          |          |          |          |          |          |          |          |          |          |          |          |          |          |          |          |          |          |          |          |          |          |          |          |          |          |          |          |          |          |          |          |          |          |          |          |          |          |          |          |          |          |          |          |          |          |          |          |          |          |          |          |          |          |          |          |          |          |          |           |           |           |           |           |           |           |           |           |           |           |           |           |           |           |           |           |           |           |           |           |           |           |           |           |           |           |           |           |           |           |           |           |           |           |           |           |           |           |           |           |           |           |           |           |           |           |           |           |           |           |           |           |           |           |           |           |           |           |           |           |           |           |           |           |           |           |           |           |           |           |           |           |           |           |           |           |           |           |           |           |           |           |           |           |           |           |           |           |           |           |           |           |           |           |           |           |           |           |           |           |           |           |           |           |           |           |           |           |           |           |           |           |           |           |           |           |           |           |           |           |           |           |           |           |           |           |           |           |           |           |           |           |           |           |           |           |           |           |           |           |           |           |           |           |           |           |           |           |           |           |           |           |           |           |           |           |           |           |           |           |           |           |           |           |           |           |           |           |           |           |           |           |           |           |           |           |           |           |           |           |           |           |           |           |           |           |           |           |           |           |           |           |           |           |           |           |           |           |           |           |           |           |           |           |           |           |           |           |           |           |           |           |           |           |           |           |           |           |           |           |           |           |           |           |           |           |           |           |           |           |           |           |           |           |           |           |           |           |           |           |           |           |           |           |           |           |           |           |           |           |           |           |           |           |           |           |           |           |           |           |           |           |           |           |           |           |           |           |           |           |           |           |           |           |           |           |           |           |           |           |           |           |           |           |           |           |           |           |           |           |           |           |           |           |           |           |           |           |           |           |           |           |           |           |           |           |           |           |           |           |           |           |           |           |           |           |           |           |           |           |           |           |           |           |           |           |           |           |           |           |           |           |           |           |           |           |           |           |           |           |           |           |           |           |           |           |           |           |           |           |           |           |           |           |           |           |           |           |           |           |           |           |           |           |           |           |           |           |           |           |           |           |           |           |           |           |           |           |           |           |           |           |           |           |           |           |           |           |           |           |           |           |           |           |           |           |           |           |           |           |           |           |           |           |           |           |           |           |           |           |           |           |           |           |           |           |           |           |           |           |           |           |           |           |           |           |           |           |           |           |           |           |           |           |           |           |           |           |           |           |           |           |           |           |           |           |           |           |           |           |           |           |           |           |           |           |           |           |           |           |           |           |           |           |           |           |           |           |           |           |           |           |           |           |           |           |           |           |           |           |           |           |           |           |           |           |           |           |           |           |           |           |           |           |           |           |           |           |           |           |           |           |           |           |           |           |           |           |           |           |           |           |           |           |           |           |           |           |           |           |           |           |           |           |           |           |           |           |           |           |           |           |           |           |           |           |           |           |           |           |           |           |           |           |           |           |           |           |           |           |           |           |           |           |           |           |           |           |           |           |           |           |           |           |           |           |           |           |           |           |           |           |           |           |           |           |           |           |           |           |           |           |           |           |           |           |           |           |           |           |           |           |           |           |           |           |           |           |           |           |           |           |           |           |           |           |           |           |           |           |           |           |           |           |           |           |           |           |           |           |           |           |           |           |           |           |           |           |           |           |           |           |           |           |           |           |           |           |           |           |           |           |           |           |           |           |           |           |           |           |           |           |           |           |           |           |           |           |           |           |           |           |           |           |           |           |           |           |           |           |           |           |           |           |           |           |           |           |           |           |           |           |           |           |           |           |           |           |           |           |           |           |           |           |           |           |           |           |           |           |           |           |           |           |           |           |           |           |           |           |           |           |           |           |           |           |           |           |           |           |           |           |           |           |           |           |           |           |           |           |           |           |           |           |           |           |           |           |           |           |           |           |           |           |           |           |           |           |           |           |           |           |           |           |           |           |           |           |           |           |           |           |           |           |           |           |           |           |           |           |           |           |           |           |           |           |           |           |           |           |           |           |           |           |           |           |           |           |           |           |           |           |           |           |           |           |           |           |           |           |           |           |           |           |           |           |           |           |           |           |           |           |           |           |           |           |           |           |           |           |           |           |           |           |           |           |           |           |           |           |           |           |           |           |           |           |           |           |           |           |           |           |           |           |           |           |           |           |           |           |           |           |           |           |           |
|-------|---------|---------|---------|---------|----------|----------|----------|----------|----------|------------|----------|----------|----------|----------|----------|----------|----------|----------|----------|----------|----------|----------|----------|----------|----------|----------|----------|----------|----------|----------|----------|----------|----------|----------|----------|----------|----------|----------|----------|----------|----------|----------|----------|----------|----------|----------|----------|----------|----------|----------|----------|----------|----------|----------|----------|----------|----------|----------|----------|----------|----------|----------|----------|----------|----------|----------|----------|----------|----------|----------|----------|----------|----------|----------|----------|----------|----------|----------|----------|----------|----------|----------|----------|----------|----------|----------|----------|----------|----------|----------|----------|----------|----------|----------|----------|----------|----------|----------|----------|----------|----------|----------|----------|-----------|-----------|-----------|-----------|-----------|-----------|-----------|-----------|-----------|-----------|-----------|-----------|-----------|-----------|-----------|-----------|-----------|-----------|-----------|-----------|-----------|-----------|-----------|-----------|-----------|-----------|-----------|-----------|-----------|-----------|-----------|-----------|-----------|-----------|-----------|-----------|-----------|-----------|-----------|-----------|-----------|-----------|-----------|-----------|-----------|-----------|-----------|-----------|-----------|-----------|-----------|-----------|-----------|-----------|-----------|-----------|-----------|-----------|-----------|-----------|-----------|-----------|-----------|-----------|-----------|-----------|-----------|-----------|-----------|-----------|-----------|-----------|-----------|-----------|-----------|-----------|-----------|-----------|-----------|-----------|-----------|-----------|-----------|-----------|-----------|-----------|-----------|-----------|-----------|-----------|-----------|-----------|-----------|-----------|-----------|-----------|-----------|-----------|-----------|-----------|-----------|-----------|-----------|-----------|-----------|-----------|-----------|-----------|-----------|-----------|-----------|-----------|-----------|-----------|-----------|-----------|-----------|-----------|-----------|-----------|-----------|-----------|-----------|-----------|-----------|-----------|-----------|-----------|-----------|-----------|-----------|-----------|-----------|-----------|-----------|-----------|-----------|-----------|-----------|-----------|-----------|-----------|-----------|-----------|-----------|-----------|-----------|-----------|-----------|-----------|-----------|-----------|-----------|-----------|-----------|-----------|-----------|-----------|-----------|-----------|-----------|-----------|-----------|-----------|-----------|-----------|-----------|-----------|-----------|-----------|-----------|-----------|-----------|-----------|-----------|-----------|-----------|-----------|-----------|-----------|-----------|-----------|-----------|-----------|-----------|-----------|-----------|-----------|-----------|-----------|-----------|-----------|-----------|-----------|-----------|-----------|-----------|-----------|-----------|-----------|-----------|-----------|-----------|-----------|-----------|-----------|-----------|-----------|-----------|-----------|-----------|-----------|-----------|-----------|-----------|-----------|-----------|-----------|-----------|-----------|-----------|-----------|-----------|-----------|-----------|-----------|-----------|-----------|-----------|-----------|-----------|-----------|-----------|-----------|-----------|-----------|-----------|-----------|-----------|-----------|-----------|-----------|-----------|-----------|-----------|-----------|-----------|-----------|-----------|-----------|-----------|-----------|-----------|-----------|-----------|-----------|-----------|-----------|-----------|-----------|-----------|-----------|-----------|-----------|-----------|-----------|-----------|-----------|-----------|-----------|-----------|-----------|-----------|-----------|-----------|-----------|-----------|-----------|-----------|-----------|-----------|-----------|-----------|-----------|-----------|-----------|-----------|-----------|-----------|-----------|-----------|-----------|-----------|-----------|-----------|-----------|-----------|-----------|-----------|-----------|-----------|-----------|-----------|-----------|-----------|-----------|-----------|-----------|-----------|-----------|-----------|-----------|-----------|-----------|-----------|-----------|-----------|-----------|-----------|-----------|-----------|-----------|-----------|-----------|-----------|-----------|-----------|-----------|-----------|-----------|-----------|-----------|-----------|-----------|-----------|-----------|-----------|-----------|-----------|-----------|-----------|-----------|-----------|-----------|-----------|-----------|-----------|-----------|-----------|-----------|-----------|-----------|-----------|-----------|-----------|-----------|-----------|-----------|-----------|-----------|-----------|-----------|-----------|-----------|-----------|-----------|-----------|-----------|-----------|-----------|-----------|-----------|-----------|-----------|-----------|-----------|-----------|-----------|-----------|-----------|-----------|-----------|-----------|-----------|-----------|-----------|-----------|-----------|-----------|-----------|-----------|-----------|-----------|-----------|-----------|-----------|-----------|-----------|-----------|-----------|-----------|-----------|-----------|-----------|-----------|-----------|-----------|-----------|-----------|-----------|-----------|-----------|-----------|-----------|-----------|-----------|-----------|-----------|-----------|-----------|-----------|-----------|-----------|-----------|-----------|-----------|-----------|-----------|-----------|-----------|-----------|-----------|-----------|-----------|-----------|-----------|-----------|-----------|-----------|-----------|-----------|-----------|-----------|-----------|-----------|-----------|-----------|-----------|-----------|-----------|-----------|-----------|-----------|-----------|-----------|-----------|-----------|-----------|-----------|-----------|-----------|-----------|-----------|-----------|-----------|-----------|-----------|-----------|-----------|-----------|-----------|-----------|-----------|-----------|-----------|-----------|-----------|-----------|-----------|-----------|-----------|-----------|-----------|-----------|-----------|-----------|-----------|-----------|-----------|-----------|-----------|-----------|-----------|-----------|-----------|-----------|-----------|-----------|-----------|-----------|-----------|-----------|-----------|-----------|-----------|-----------|-----------|-----------|-----------|-----------|-----------|-----------|-----------|-----------|-----------|-----------|-----------|-----------|-----------|-----------|-----------|-----------|-----------|-----------|-----------|-----------|-----------|-----------|-----------|-----------|-----------|-----------|-----------|-----------|-----------|-----------|-----------|-----------|-----------|-----------|-----------|-----------|-----------|-----------|-----------|-----------|-----------|-----------|-----------|-----------|-----------|-----------|-----------|-----------|-----------|-----------|-----------|-----------|-----------|-----------|-----------|-----------|-----------|-----------|-----------|-----------|-----------|-----------|-----------|-----------|-----------|-----------|-----------|-----------|-----------|-----------|-----------|-----------|-----------|-----------|-----------|-----------|-----------|-----------|-----------|-----------|-----------|-----------|-----------|-----------|-----------|-----------|-----------|-----------|-----------|-----------|-----------|-----------|-----------|-----------|-----------|-----------|-----------|-----------|-----------|-----------|-----------|-----------|-----------|-----------|-----------|-----------|-----------|-----------|-----------|-----------|-----------|-----------|-----------|-----------|-----------|-----------|-----------|-----------|-----------|-----------|-----------|-----------|-----------|-----------|-----------|-----------|-----------|-----------|-----------|-----------|-----------|-----------|-----------|-----------|-----------|-----------|-----------|-----------|-----------|-----------|-----------|-----------|-----------|-----------|-----------|-----------|-----------|-----------|-----------|-----------|-----------|-----------|-----------|-----------|-----------|-----------|-----------|-----------|-----------|-----------|-----------|-----------|-----------|-----------|-----------|-----------|-----------|-----------|-----------|-----------|-----------|-----------|-----------|-----------|-----------|-----------|-----------|-----------|-----------|-----------|-----------|-----------|-----------|-----------|-----------|-----------|-----------|-----------|-----------|-----------|-----------|-----------|-----------|-----------|-----------|-----------|-----------|-----------|-----------|-----------|-----------|-----------|-----------|-----------|-----------|-----------|-----------|-----------|-----------|-----------|-----------|-----------|-----------|-----------|-----------|-----------|-----------|-----------|-----------|-----------|-----------|-----------|-----------|-----------|-----------|-----------|-----------|-----------|-----------|-----------|-----------|-----------|-----------|-----------|-----------|-----------|-----------|-----------|-----------|-----------|-----------|-----------|-----------|-----------|-----------|-----------|-----------|-----------|-----------|-----------|-----------|-----------|-----------|-----------|-----------|-----------|-----------|-----------|-----------|-----------|-----------|-----------|-----------|-----------|-----------|-----------|-----------|-----------|-----------|-----------|-----------|-----------|-----------|-----------|-----------|-----------|-----------|-----------|-----------|-----------|-----------|-----------|-----------|-----------|-----------|-----------|-----------|-----------|-----------|-----------|-----------|-----------|-----------|-----------|-----------|-----------|-----------|-----------|-----------|-----------|-----------|-----------|-----------|-----------|-----------|-----------|-----------|-----------|-----------|-----------|-----------|-----------|-----------|-----------|-----------|-----------|-----------|-----------|-----------|-----------|-----------|-----------|-----------|-----------|-----------|-----------|-----------|-----------|-----------|-----------|-----------|-----------|-----------|-----------|-----------|-----------|-----------|-----------|-----------|-----------|-----------|-----------|-----------|-----------|-----------|-----------|-----------|-----------|-----------|-----------|
|       | Uniprot | Control | Control | Control | IC20 0.1 | IC20 0.2 | IC20 0.3 | IC20 0.4 | IC20 0.5 | IC20 0.6   | IC20 0.7 | IC20 0.8 | IC20 0.9 | IC20 1.0 | IC20 1.1 | IC20 1.2 | IC20 1.3 | IC20 1.4 | IC20 1.5 | IC20 1.6 | IC20 1.7 | IC20 1.8 | IC20 1.9 | IC20 2.0 | IC20 2.1 | IC20 2.2 | IC20 2.3 | IC20 2.4 | IC20 2.5 | IC20 2.6 | IC20 2.7 | IC20 2.8 | IC20 2.9 | IC20 3.0 | IC20 3.1 | IC20 3.2 | IC20 3.3 | IC20 3.4 | IC20 3.5 | IC20 3.6 | IC20 3.7 | IC20 3.8 | IC20 3.9 | IC20 4.0 | IC20 4.1 | IC20 4.2 | IC20 4.3 | IC20 4.4 | IC20 4.5 | IC20 4.6 | IC20 4.7 | IC20 4.8 | IC20 4.9 | IC20 5.0 | IC20 5.1 | IC20 5.2 | IC20 5.3 | IC20 5.4 | IC20 5.5 | IC20 5.6 | IC20 5.7 | IC20 5.8 | IC20 5.9 | IC20 6.0 | IC20 6.1 | IC20 6.2 | IC20 6.3 | IC20 6.4 | IC20 6.5 | IC20 6.6 | IC20 6.7 | IC20 6.8 | IC20 6.9 | IC20 7.0 | IC20 7.1 | IC20 7.2 | IC20 7.3 | IC20 7.4 | IC20 7.5 | IC20 7.6 | IC20 7.7 | IC20 7.8 | IC20 7.9 | IC20 8.0 | IC20 8.1 | IC20 8.2 | IC20 8.3 | IC20 8.4 | IC20 8.5 | IC20 8.6 | IC20 8.7 | IC20 8.8 | IC20 8.9 | IC20 9.0 | IC20 9.1 | IC20 9.2 | IC20 9.3 | IC20 9.4 | IC20 9.5 | IC20 9.6 | IC20 9.7 | IC20 9.8 | IC20 9.9 | IC20 10.0 | IC20 10.1 | IC20 10.2 | IC20 10.3 | IC20 10.4 | IC20 10.5 | IC20 10.6 | IC20 10.7 | IC20 10.8 | IC20 10.9 | IC20 11.0 | IC20 11.1 | IC20 11.2 | IC20 11.3 | IC20 11.4 | IC20 11.5 | IC20 11.6 | IC20 11.7 | IC20 11.8 | IC20 11.9 | IC20 12.0 | IC20 12.1 | IC20 12.2 | IC20 12.3 | IC20 12.4 | IC20 12.5 | IC20 12.6 | IC20 12.7 | IC20 12.8 | IC20 12.9 | IC20 13.0 | IC20 13.1 | IC20 13.2 | IC20 13.3 | IC20 13.4 | IC20 13.5 | IC20 13.6 | IC20 13.7 | IC20 13.8 | IC20 13.9 | IC20 14.0 | IC20 14.1 | IC20 14.2 | IC20 14.3 | IC20 14.4 | IC20 14.5 | IC20 14.6 | IC20 14.7 | IC20 14.8 | IC20 14.9 | IC20 15.0 | IC20 15.1 | IC20 15.2 | IC20 15.3 | IC20 15.4 | IC20 15.5 | IC20 15.6 | IC20 15.7 | IC20 15.8 | IC20 15.9 | IC20 16.0 | IC20 16.1 | IC20 16.2 | IC20 16.3 | IC20 16.4 | IC20 16.5 | IC20 16.6 | IC20 16.7 | IC20 16.8 | IC20 16.9 | IC20 17.0 | IC20 17.1 | IC20 17.2 | IC20 17.3 | IC20 17.4 | IC20 17.5 | IC20 17.6 | IC20 17.7 | IC20 17.8 | IC20 17.9 | IC20 18.0 | IC20 18.1 | IC20 18.2 | IC20 18.3 | IC20 18.4 | IC20 18.5 | IC20 18.6 | IC20 18.7 | IC20 18.8 | IC20 18.9 | IC20 19.0 | IC20 19.1 | IC20 19.2 | IC20 19.3 | IC20 19.4 | IC20 19.5 | IC20 19.6 | IC20 19.7 | IC20 19.8 | IC20 19.9 | IC20 20.0 | IC20 20.1 | IC20 20.2 | IC20 20.3 | IC20 20.4 | IC20 20.5 | IC20 20.6 | IC20 20.7 | IC20 20.8 | IC20 20.9 | IC20 21.0 | IC20 21.1 | IC20 21.2 | IC20 21.3 | IC20 21.4 | IC20 21.5 | IC20 21.6 | IC20 21.7 | IC20 21.8 | IC20 21.9 | IC20 22.0 | IC20 22.1 | IC20 22.2 | IC20 22.3 | IC20 22.4 | IC20 22.5 | IC20 22.6 | IC20 22.7 | IC20 22.8 | IC20 22.9 | IC20 23.0 | IC20 23.1 | IC20 23.2 | IC20 23.3 | IC20 23.4 | IC20 23.5 | IC20 23.6 | IC20 23.7 | IC20 23.8 | IC20 23.9 | IC20 24.0 | IC20 24.1 | IC20 24.2 | IC20 24.3 | IC20 24.4 | IC20 24.5 | IC20 24.6 | IC20 24.7 | IC20 24.8 | IC20 24.9 | IC20 25.0 | IC20 25.1 | IC20 25.2 | IC20 25.3 | IC20 25.4 | IC20 25.5 | IC20 25.6 | IC20 25.7 | IC20 25.8 | IC20 25.9 | IC20 26.0 | IC20 26.1 | IC20 26.2 | IC20 26.3 | IC20 26.4 | IC20 26.5 | IC20 26.6 | IC20 26.7 | IC20 26.8 | IC20 26.9 | IC20 27.0 | IC20 27.1 | IC20 27.2 | IC20 27.3 | IC20 27.4 | IC20 27.5 | IC20 27.6 | IC20 27.7 | IC20 27.8 | IC20 27.9 | IC20 28.0 | IC20 28.1 | IC20 28.2 | IC20 28.3 | IC20 28.4 | IC20 28.5 | IC20 28.6 | IC20 28.7 | IC20 28.8 | IC20 28.9 | IC20 29.0 | IC20 29.1 | IC20 29.2 | IC20 29.3 | IC20 29.4 | IC20 29.5 | IC20 29.6 | IC20 29.7 | IC20 29.8 | IC20 29.9 | IC20 30.0 | IC20 30.1 | IC20 30.2 | IC20 30.3 | IC20 30.4 | IC20 30.5 | IC20 30.6 | IC20 30.7 | IC20 30.8 | IC20 30.9 | IC20 31.0 | IC20 31.1 | IC20 31.2 | IC20 31.3 | IC20 31.4 | IC20 31.5 | IC20 31.6 | IC20 31.7 | IC20 31.8 | IC20 31.9 | IC20 32.0 | IC20 32.1 | IC20 32.2 | IC20 32.3 | IC20 32.4 | IC20 32.5 | IC20 32.6 | IC20 32.7 | IC20 32.8 | IC20 32.9 | IC20 33.0 | IC20 33.1 | IC20 33.2 | IC20 33.3 | IC20 33.4 | IC20 33.5 | IC20 33.6 | IC20 33.7 | IC20 33.8 | IC20 33.9 | IC20 34.0 | IC20 34.1 | IC20 34.2 | IC20 34.3 | IC20 34.4 | IC20 34.5 | IC20 34.6 | IC20 34.7 | IC20 34.8 | IC20 34.9 | IC20 35.0 | IC20 35.1 | IC20 35.2 | IC20 35.3 | IC20 35.4 | IC20 35.5 | IC20 35.6 | IC20 35.7 | IC20 35.8 | IC20 35.9 | IC20 36.0 | IC20 36.1 | IC20 36.2 | IC20 36.3 | IC20 36.4 | IC20 36.5 | IC20 36.6 | IC20 36.7 | IC20 36.8 | IC20 36.9 | IC20 37.0 | IC20 37.1 | IC20 37.2 | IC20 37.3 | IC20 37.4 | IC20 37.5 | IC20 37.6 | IC20 37.7 | IC20 37.8 | IC20 37.9 | IC20 38.0 | IC20 38.1 | IC20 38.2 | IC20 38.3 | IC20 38.4 | IC20 38.5 | IC20 38.6 | IC20 38.7 | IC20 38.8 | IC20 38.9 | IC20 39.0 | IC20 39.1 | IC20 39.2 | IC20 39.3 | IC20 39.4 | IC20 39.5 | IC20 39.6 | IC20 39.7 | IC20 39.8 | IC20 39.9 | IC20 40.0 | IC20 40.1 | IC20 40.2 | IC20 40.3 | IC20 40.4 | IC20 40.5 | IC20 40.6 | IC20 40.7 | IC20 40.8 | IC20 40.9 | IC20 41.0 | IC20 41.1 | IC20 41.2 | IC20 41.3 | IC20 41.4 | IC20 41.5 | IC20 41.6 | IC20 41.7 | IC20 41.8 | IC20 41.9 | IC20 42.0 | IC20 42.1 | IC20 42.2 | IC20 42.3 | IC20 42.4 | IC20 42.5 | IC20 42.6 | IC20 42.7 | IC20 42.8 | IC20 42.9 | IC20 43.0 | IC20 43.1 | IC20 43.2 | IC20 43.3 | IC20 43.4 | IC20 43.5 | IC20 43.6 | IC20 43.7 | IC20 43.8 | IC20 43.9 | IC20 44.0 | IC20 44.1 | IC20 44.2 | IC20 44.3 | IC20 44.4 | IC20 44.5 | IC20 44.6 | IC20 44.7 | IC20 44.8 | IC20 44.9 | IC20 45.0 | IC20 45.1 | IC20 45.2 | IC20 45.3 | IC20 45.4 | IC20 45.5 | IC20 45.6 | IC20 45.7 | IC20 45.8 | IC20 45.9 | IC20 46.0 | IC20 46.1 | IC20 46.2 | IC20 46.3 | IC20 46.4 | IC20 46.5 | IC20 46.6 | IC20 46.7 | IC20 46.8 | IC20 46.9 | IC20 47.0 | IC20 47.1 | IC20 47.2 | IC20 47.3 | IC20 47.4 | IC20 47.5 | IC20 47.6 | IC20 47.7 | IC20 47.8 | IC20 47.9 | IC20 48.0 | IC20 48.1 | IC20 48.2 | IC20 48.3 | IC20 48.4 | IC20 48.5 | IC20 48.6 | IC20 48.7 | IC20 48.8 | IC20 48.9 | IC20 49.0 | IC20 49.1 | IC20 49.2 | IC20 49.3 | IC20 49.4 | IC20 49.5 | IC20 49.6 | IC20 49.7 | IC20 49.8 | IC20 49.9 | IC20 50.0 | IC20 50.1 | IC20 50.2 | IC20 50.3 | IC20 50.4 | IC20 50.5 | IC20 50.6 | IC20 50.7 | IC20 50.8 | IC20 50.9 | IC20 51.0 | IC20 51.1 | IC20 51.2 | IC20 51.3 | IC20 51.4 | IC20 51.5 | IC20 51.6 | IC20 51.7 | IC20 51.8 | IC20 51.9 | IC20 52.0 | IC20 52.1 | IC20 52.2 | IC20 52.3 | IC20 52.4 | IC20 52.5 | IC20 52.6 | IC20 52.7 | IC20 52.8 | IC20 52.9 | IC20 53.0 | IC20 53.1 | IC20 53.2 | IC20 53.3 | IC20 53.4 | IC20 53.5 | IC20 53.6 | IC20 53.7 | IC20 53.8 | IC20 53.9 | IC20 54.0 | IC20 54.1 | IC20 54.2 | IC20 54.3 | IC20 54.4 | IC20 54.5 | IC20 54.6 | IC20 54.7 | IC20 54.8 | IC20 54.9 | IC20 55.0 | IC20 55.1 | IC20 55.2 | IC20 55.3 | IC20 55.4 | IC20 55.5 | IC20 55.6 | IC20 55.7 | IC20 55.8 | IC20 55.9 | IC20 56.0 | IC20 56.1 | IC20 56.2 | IC20 56.3 | IC20 56.4 | IC20 56.5 | IC20 56.6 | IC20 56.7 | IC20 56.8 | IC20 56.9 | IC20 57.0 | IC20 57.1 | IC20 57.2 | IC20 57.3 | IC20 57.4 | IC20 57.5 | IC20 57.6 | IC20 57.7 | IC20 57.8 | IC20 57.9 | IC20 58.0 | IC20 58.1 | IC20 58.2 | IC20 58.3 | IC20 58.4 | IC20 58.5 | IC20 58.6 | IC20 58.7 | IC20 58.8 | IC20 58.9 | IC20 59.0 | IC20 59.1 | IC20 59.2 | IC20 59.3 | IC20 59.4 | IC20 59.5 | IC20 59.6 | IC20 59.7 | IC20 59.8 | IC20 59.9 | IC20 60.0 | IC20 60.1 | IC20 60.2 | IC20 60.3 | IC20 60.4 | IC20 60.5 | IC20 60.6 | IC20 60.7 | IC20 60.8 | IC20 60.9 | IC20 61.0 | IC20 61.1 | IC20 61.2 | IC20 61.3 | IC20 61.4 | IC20 61.5 | IC20 61.6 | IC20 61.7 | IC20 61.8 | IC20 61.9 | IC20 62.0 | IC20 62.1 | IC20 62.2 | IC20 62.3 | IC20 62.4 | IC20 62.5 | IC20 62.6 | IC20 62.7 | IC20 62.8 | IC20 62.9 | IC20 63.0 | IC20 63.1 | IC20 63.2 | IC20 63.3 | IC20 63.4 | IC20 63.5 | IC20 63.6 | IC20 63.7 | IC20 63.8 | IC20 63.9 | IC20 64.0 | IC20 64.1 | IC20 64.2 | IC20 64.3 | IC20 64.4 | IC20 64.5 | IC20 64.6 | IC20 64.7 | IC20 64.8 | IC20 64.9 | IC20 65.0 | IC20 65.1 | IC20 65.2 | IC20 65.3 | IC20 65.4 | IC20 65.5 | IC20 65.6 | IC20 65.7 | IC20 65.8 | IC20 65.9 | IC20 66.0 | IC20 66.1 | IC20 66.2 | IC20 66.3 | IC20 66.4 | IC20 66.5 | IC20 66.6 | IC20 66.7 | IC20 66.8 | IC20 66.9 | IC20 67.0 | IC20 67.1 | IC20 67.2 | IC20 67.3 | IC20 67.4 | IC20 67.5 | IC20 67.6 | IC20 67.7 | IC20 67.8 | IC20 67.9 | IC20 68.0 | IC20 68.1 | IC20 68.2 | IC20 68.3 | IC20 68.4 | IC20 68.5 | IC20 68.6 | IC20 68.7 | IC20 68.8 | IC20 68.9 | IC20 69.0 | IC20 69.1 | IC20 69.2 | IC20 69.3 | IC20 69.4 | IC20 69.5 | IC20 69.6 | IC20 69.7 | IC20 69.8 | IC20 69.9 | IC20 70.0 | IC20 70.1 | IC20 70.2 | IC20 70.3 | IC20 70.4 | IC20 70.5 | IC20 70.6 | IC20 70.7 | IC20 70.8 | IC20 70.9 | IC20 71.0 | IC20 71.1 | IC20 71.2 | IC20 71.3 | IC20 71.4 | IC20 71.5 | IC20 71.6 | IC20 71.7 | IC20 71.8 | IC20 71.9 | IC20 72.0 | IC20 72.1 | IC20 72.2 | IC20 72.3 | IC20 72.4 | IC20 72.5 | IC20 72.6 | IC20 72.7 | IC20 72.8 | IC20 72.9 | IC20 73.0 | IC20 73.1 | IC20 73.2 | IC20 73.3 | IC20 73.4 | IC20 73.5 | IC20 73.6 | IC20 73.7 | IC20 73.8 | IC20 73.9 | IC20 74.0 | IC20 74.1 | IC20 74.2 | IC20 74.3 | IC20 74.4 | IC20 74.5 | IC20 74.6 | IC20 74.7 | IC20 74.8 | IC20 74.9 | IC20 75.0 | IC20 75.1 | IC20 75.2 | IC20 75.3 | IC20 75.4 | IC20 75.5 | IC20 75.6 | IC20 75.7 | IC20 75.8 | IC20 75.9 | IC20 76.0 | IC20 76.1 | IC20 76.2 | IC20 76.3 | IC20 76.4 | IC20 76.5 | IC20 76.6 | IC20 76.7 | IC20 76.8 | IC20 76.9 | IC20 77.0 | IC20 77.1 | IC20 77.2 | IC20 77.3 | IC20 77.4 | IC20 77.5 | IC20 77.6 | IC20 77.7 | IC20 77.8 | IC20 77.9 | IC20 78.0 | IC20 78.1 | IC20 78.2 | IC20 78.3 | IC20 78.4 | IC20 78.5 | IC20 78.6 | IC20 78.7 | IC20 78.8 | IC20 78.9 | IC20 79.0 | IC20 79.1 | IC20 79.2 | IC20 79.3 | IC20 79.4 | IC20 79.5 | IC20 79.6 | IC20 79.7 | IC20 79.8 | IC20 79.9 | IC20 80.0 | IC20 80.1 | IC20 80.2 | IC20 80.3 | IC20 80.4 | IC20 80.5 | IC20 80.6 | IC20 80.7 | IC20 80.8 | IC20 80.9 | IC20 81.0 | IC20 81.1 | IC20 81.2 | IC20 81.3 | IC20 81.4 | IC20 81.5 | IC20 81.6 | IC20 81.7 | IC20 81.8 | IC20 81.9 | IC20 82.0 | IC20 82.1 | IC20 82.2 | IC20 82.3 | IC20 82.4 | IC20 82.5 | IC20 82.6 | IC20 82.7 | IC20 82.8 | IC20 82.9 | IC20 83.0 | IC20 83.1 | IC20 83.2 | IC20 83.3 | IC20 83.4 | IC20 83.5 | IC20 83.6 | IC20 83.7 | IC20 83.8 | IC20 83.9 | IC20 84.0 | IC20 84.1 | IC20 84.2 | IC20 84.3 | IC20 84.4 | IC20 84.5 | IC20 84.6 | IC20 84.7 | IC20 84.8 | IC20 84.9 | IC20 85.0 | IC20 85.1 | IC20 85.2 | IC20 85.3 | IC20 85.4 | IC20 85.5 | IC20 85.6 | IC20 85.7 | IC20 85.8 | IC20 85.9 | IC20 86.0 | IC20 86.1 | IC20 86.2 | IC20 86.3 | IC20 86.4 | IC20 86.5 | IC20 86.6 | IC20 86.7 | IC20 86.8 | IC20 86.9 | IC20 87.0 | IC20 87.1 | IC20 87.2 | IC20 87.3 | IC20 87.4 | IC20 87.5 | IC20 87.6 | IC20 87.7 | IC20 87.8 | IC20 87.9 | IC20 88.0 | IC20 88.1 | IC20 88.2 | IC20 88.3 | IC20 88.4 | IC20 88.5 | IC20 88.6 | IC20 88.7 | IC20 88.8 | IC20 88.9 | IC20 89.0 | IC20 89.1 | IC20 89.2 | IC20 89.3 | IC20 89.4 | IC20 89.5 | IC20 89.6 | IC20 89.7 | IC20 89.8 | IC20 89.9 | IC20 90.0 | IC20 90.1 | IC20 90.2 | IC20 90.3 | IC20 90.4 | IC20 90.5 | IC20 90.6 | IC20 90.7 | IC20 90.8 | IC20 90.9 | IC20 91.0 | IC20 91.1 | IC20 91.2 | IC20 91.3 | IC20 91.4 | IC20 91.5 | IC20 91.6 | IC20 91.7 | IC20 91.8 | IC20 91.9 | IC20 92.0 | IC20 92.1 | IC20 92.2 | IC20 92.3 | IC20 92.4 | IC20 92.5 | IC20 92.6 | IC20 92.7 | IC20 92.8 | IC20 92.9 | IC20 93.0 | IC20 93.1 | IC20 93.2 | IC20 93.3 | IC20 93.4 | IC20 93.5 | IC20 93.6 | IC20 93.7 | IC20 93.8 | IC20 93.9 | IC20 94.0 | IC20 94.1 | IC20 94.2 | IC20 94.3 | IC20 94.4 | IC20 94.5 | IC20 94.6 | IC20 94.7 | IC20 94.8 | IC20 94.9 | IC20 95.0 | IC20 95.1 | IC20 95.2 | IC20 95.3 | IC20 95.4 | IC20 95.5 |

Supplementary Table S1. Overview on the abundance of all relatively quantified 5180 proteins

| Gene | Protein                                                                      | UniProt | MCF-7      |            |            |             |             |             |             |             |             |             | MDA-MB-231  |             |             |             |             |             |             |             |             |             | unique to MCF-7 | unique to MDA-MB-231 |             |            |            |             |             |             |             |             |             |             |             |             |
|------|------------------------------------------------------------------------------|---------|------------|------------|------------|-------------|-------------|-------------|-------------|-------------|-------------|-------------|-------------|-------------|-------------|-------------|-------------|-------------|-------------|-------------|-------------|-------------|-----------------|----------------------|-------------|------------|------------|-------------|-------------|-------------|-------------|-------------|-------------|-------------|-------------|-------------|
|      |                                                                              |         | control 01 | control 02 | control 03 | Dai IC20 01 | Dai IC20 02 | Dai IC20 03 | Dai SC20 01 | Dai SC20 02 | Dai SC20 03 | Gen IC20 01 | Gen IC20 02 | Gen IC20 03 | Gen SC20 01 | Gen SC20 02 | Gen SC20 03 | SSE IC20 01 | SSE IC20 02 | SSE IC20 03 | SSE SC20 01 | SSE SC20 02 |                 |                      | SSE SC20 03 | control 01 | control 02 | Dai IC20 01 | Dai IC20 02 | Dai IC20 03 | Gen IC20 01 | Gen IC20 02 | Gen IC20 03 | SSE IC20 01 | SSE IC20 02 | SSE IC20 03 |
| 3097 | Phosphatidylinositol 3-kinase catalytic subunit type 3                       | Q8NE89  | 382.43     | 304.32     | 430.10     | 236.66      | 280.27      | 170.55      | 359.85      | 338.64      | 296.08      | 257.50      | 217.66      | 182.28      | 437.86      | 156.93      | 174.67      | 204.33      | 140.95      | 183.09      | 215.47      | 158.91      | 226.16          | 2.27                 | 1.49        | 0.65       | 0.84       | 1.31        | 0.69        | 4.16        | 2.47        | 0.11        | 4.90        | 4.98        | 0.12        | x           |
| 3098 | Phosphatidylinositol 3-kinase regulatory subunit beta                        | Q00459  | 1441.93    | 1028.81    | 862.30     | 669.20      | 637.29      | 588.93      | 1101.99     | 989.52      | 928.21      | 993.83      | 1094.60     | 1021.40     | 857.13      | 862.08      | 300.14      | 902.91      | 724.69      | 843.76      | 830.77      | 666.16      | 608.00          | 2.27                 | 1.49        | 0.65       | 0.84       | 1.31        | 0.69        | 4.16        | 2.47        | 0.11        | 4.90        | 4.98        | 0.12        | x           |
| 3099 | Phosphatidylinositol 4, 5-bisphosphate 3-kinase catalytic subunit beta       | P42338  | 824.50     | 828.65     | 7347.15    | 5712.83     | 5666.14     | 5296.13     | 6824.66     | 8334.11     | 7942.43     | 7940.19     | 7509.66     | 7628.72     | 7101.40     | 6602.48     | 5920.68     | 6244.84     | 6033.24     | 5508.29     | 5333.29     | 5325.66     | 5338.14         | 2.27                 | 1.49        | 0.65       | 0.84       | 1.31        | 0.69        | 4.16        | 2.47        | 0.11        | 4.90        | 4.98        | 0.12        | x           |
| 3100 | Phosphatidylinositol 4-kinase alpha                                          | P42356  | 13997.09   | 137485.91  | 128282.02  | 94281.66    | 89178.68    | 80374.88    | 112662.83   | 113002.98   | 107086.08   | 119393.36   | 122246.68   | 107716.65   | 114858.76   | 106974.55   | 84047.44    | 98179.56    | 94365.52    | 90626.85    | 108645.89   | 100804.54   | 93970.44        | 51326.15             | 52314.71    | 44189.36   | 33890.93   | 30557.77    | 25516.72    | 40644.14    | 36274.73    | 33951.73    | 39681.89    | 39044.36    | 29946.47    |             |
| 3101 | Phosphatidylinositol 4-kinase type 2-alpha                                   | QBUT61  | 0.14       | 2.53       | 0.81       | 1.07        | 2.77        | 0.68        | 0.96        | 0.36        | 0.63        | 0.35        | 0.75        | 0.38        | 2.13        | 0.97        | 0.60        | 4.64        | 1.07        | 0.47        | 2.22        | 0.19        | 0.06            | 1121.77              | 11560.43    | 9497.52    | 12419.71   | 12498.79    | 10199.99    | 15780.52    | 14804.68    | 13458.18    | 13418.25    | 12879.80    | 8885.71     |             |
| 3102 | Phosphatidylinositol 4-phosphate 3-kinase C2 domain-containing subunit alpha | Q00443  | 0.14       | 2.53       | 0.81       | 1.07        | 2.77        | 0.68        | 0.96        | 0.36        | 0.63        | 0.35        | 0.75        | 0.38        | 2.13        | 0.97        | 0.60        | 4.64        | 1.07        | 0.47        | 2.22        | 0.19        | 0.06            | 6511.53              | 7939.39     | 7706.74    | 6002.90    | 6029.39     | 5713.04     | 8444.83     | 8356.06     | 7827.14     | 6589.76     | 6404.36     | 4951.76     |             |
| 3103 | Phosphatidylinositol 4-phosphate 5-kinase type-1 alpha                       | Q9P755  | 0.14       | 2.53       | 0.81       | 1.07        | 2.77        | 0.68        | 0.96        | 0.36        | 0.63        | 0.35        | 0.75        | 0.38        | 2.13        | 0.97        | 0.60        | 4.64        | 1.07        | 0.47        | 2.22        | 0.19        | 0.06            | 1121.77              | 11560.43    | 9497.52    | 12419.71   | 12498.79    | 10199.99    | 15780.52    | 14804.68    | 13458.18    | 13418.25    | 12879.80    | 8885.71     |             |
| 3104 | Phosphatidylinositol 4-phosphate 4-kinase type-2 beta                        | P78356  | 0.14       | 2.53       | 0.81       | 1.07        | 2.77        | 0.68        | 0.96        | 0.36        | 0.63        | 0.35        | 0.75        | 0.38        | 2.13        | 0.97        | 0.60        | 4.64        | 1.07        | 0.47        | 2.22        | 0.19        | 0.06            | 5134.73              | 51660.43    | 3200.54    | 257.27     | 251.39      | 210.94      | 278.38      | 278.11      | 171.98      | 318.95      | 220.21      | 149.38      |             |
| 3105 | Phosphatidylinositol 5-phosphate 4-kinase type-2 gamma                       | QBTRX8  | 20763.70   | 195379.86  | 16637.38   | 17029.30    | 16162.31    | 14845.83    | 19052.85    | 16978.73    | 17352.48    | 22127.99    | 20705.52    | 17673.22    | 20094.42    | 17558.13    | 12712.48    | 16935.47    | 16411.59    | 15531.55    | 18057.73    | 16342.32    | 14814.64        | 2.27                 | 1.49        | 0.65       | 0.84       |             |             |             |             |             |             |             |             |             |

Supplementary Table S1. Overview on the abundance of all relatively quantified 5180 proteins

| Protein name | Uniprot | control 01 | control 02 | control 03 | IC20 01 | IC20 02 | IC20 03 | IC20 04 | IC20 05 | IC20 06 | IC20 07 | IC20 08 | IC20 09 | IC20 10 | IC20 11 | IC20 12 | IC20 13 | IC20 14 | IC20 15 | IC20 16 | IC20 17 | IC20 18 | IC20 19 | IC20 20 | IC20 21 | IC20 22 | IC20 23 | IC20 24 | IC20 25 | IC20 26 | IC20 27 | IC20 28 | IC20 29 | IC20 30 | IC20 31 | IC20 32 | IC20 33 | IC20 34 | IC20 35 | IC20 36 | IC20 37 | IC20 38 | IC20 39 | IC20 40 | IC20 41 | IC20 42 | IC20 43 | IC20 44 | IC20 45 | IC20 46 | IC20 47 | IC20 48 | IC20 49 | IC20 50 | IC20 51 | IC20 52 | IC20 53 | IC20 54 | IC20 55 | IC20 56 | IC20 57 | IC20 58 | IC20 59 | IC20 60 | IC20 61 | IC20 62 | IC20 63 | IC20 64 | IC20 65 | IC20 66 | IC20 67 | IC20 68 | IC20 69 | IC20 70 | IC20 71 | IC20 72 | IC20 73 | IC20 74 | IC20 75 | IC20 76 | IC20 77 | IC20 78 | IC20 79 | IC20 80 | IC20 81 | IC20 82 | IC20 83 | IC20 84 | IC20 85 | IC20 86 | IC20 87 | IC20 88 | IC20 89 | IC20 90 | IC20 91 | IC20 92 | IC20 93 | IC20 94 | IC20 95 | IC20 96 | IC20 97 | IC20 98 | IC20 99 | IC20 100 | IC20 101 | IC20 102 | IC20 103 | IC20 104 | IC20 105 | IC20 106 | IC20 107 | IC20 108 | IC20 109 | IC20 110 | IC20 111 | IC20 112 | IC20 113 | IC20 114 | IC20 115 | IC20 116 | IC20 117 | IC20 118 | IC20 119 | IC20 120 | IC20 121 | IC20 122 | IC20 123 | IC20 124 | IC20 125 | IC20 126 | IC20 127 | IC20 128 | IC20 129 | IC20 130 | IC20 131 | IC20 132 | IC20 133 | IC20 134 | IC20 135 | IC20 136 | IC20 137 | IC20 138 | IC20 139 | IC20 140 | IC20 141 | IC20 142 | IC20 143 | IC20 144 | IC20 145 | IC20 146 | IC20 147 | IC20 148 | IC20 149 | IC20 150 | IC20 151 | IC20 152 | IC20 153 | IC20 154 | IC20 155 | IC20 156 | IC20 157 | IC20 158 | IC20 159 | IC20 160 | IC20 161 | IC20 162 | IC20 163 | IC20 164 | IC20 165 | IC20 166 | IC20 167 | IC20 168 | IC20 169 | IC20 170 | IC20 171 | IC20 172 | IC20 173 | IC20 174 | IC20 175 | IC20 176 | IC20 177 | IC20 178 | IC20 179 | IC20 180 | IC20 181 | IC20 182 | IC20 183 | IC20 184 | IC20 185 | IC20 186 | IC20 187 | IC20 188 | IC20 189 | IC20 190 | IC20 191 | IC20 192 | IC20 193 | IC20 194 | IC20 195 | IC20 196 | IC20 197 | IC20 198 | IC20 199 | IC20 200 | IC20 201 | IC20 202 | IC20 203 | IC20 204 | IC20 205 | IC20 206 | IC20 207 | IC20 208 | IC20 209 | IC20 210 | IC20 211 | IC20 212 | IC20 213 | IC20 214 | IC20 215 | IC20 216 | IC20 217 | IC20 218 | IC20 219 | IC20 220 | IC20 221 | IC20 222 | IC20 223 | IC20 224 | IC20 225 | IC20 226 | IC20 227 | IC20 228 | IC20 229 | IC20 230 | IC20 231 | IC20 232 | IC20 233 | IC20 234 | IC20 235 | IC20 236 | IC20 237 | IC20 238 | IC20 239 | IC20 240 | IC20 241 | IC20 242 | IC20 243 | IC20 244 | IC20 245 | IC20 246 | IC20 247 | IC20 248 | IC20 249 | IC20 250 | IC20 251 | IC20 252 | IC20 253 | IC20 254 | IC20 255 | IC20 256 | IC20 257 | IC20 258 | IC20 259 | IC20 260 | IC20 261 | IC20 262 | IC20 263 | IC20 264 | IC20 265 | IC20 266 | IC20 267 | IC20 268 | IC20 269 | IC20 270 | IC20 271 | IC20 272 | IC20 273 | IC20 274 | IC20 275 | IC20 276 | IC20 277 | IC20 278 | IC20 279 | IC20 280 | IC20 281 | IC20 282 | IC20 283 | IC20 284 | IC20 285 | IC20 286 | IC20 287 | IC20 288 | IC20 289 | IC20 290 | IC20 291 | IC20 292 | IC20 293 | IC20 294 | IC20 295 | IC20 296 | IC20 297 | IC20 298 | IC20 299 | IC20 300 | IC20 301 | IC20 302 | IC20 303 | IC20 304 | IC20 305 | IC20 306 | IC20 307 | IC20 308 | IC20 309 | IC20 310 | IC20 311 | IC20 312 | IC20 313 | IC20 314 | IC20 315 | IC20 316 | IC20 317 | IC20 318 | IC20 319 | IC20 320 | IC20 321 | IC20 322 | IC20 323 | IC20 324 | IC20 325 | IC20 326 | IC20 327 | IC20 328 | IC20 329 | IC20 330 | IC20 331 | IC20 332 | IC20 333 | IC20 334 | IC20 335 | IC20 336 | IC20 337 | IC20 338 | IC20 339 | IC20 340 | IC20 341 | IC20 342 | IC20 343 | IC20 344 | IC20 345 | IC20 346 | IC20 347 | IC20 348 | IC20 349 | IC20 350 | IC20 351 | IC20 352 | IC20 353 | IC20 354 | IC20 355 | IC20 356 | IC20 357 | IC20 358 | IC20 359 | IC20 360 | IC20 361 | IC20 362 | IC20 363 | IC20 364 | IC20 365 | IC20 366 | IC20 367 | IC20 368 | IC20 369 | IC20 370 | IC20 371 | IC20 372 | IC20 373 | IC20 374 | IC20 375 | IC20 376 | IC20 377 | IC20 378 | IC20 379 | IC20 380 | IC20 381 | IC20 382 | IC20 383 | IC20 384 | IC20 385 | IC20 386 | IC20 387 | IC20 388 | IC20 389 | IC20 390 | IC20 391 | IC20 392 | IC20 393 | IC20 394 | IC20 395 | IC20 396 | IC20 397 | IC20 398 | IC20 399 | IC20 400 | IC20 401 | IC20 402 | IC20 403 | IC20 404 | IC20 405 | IC20 406 | IC20 407 | IC20 408 | IC20 409 | IC20 410 | IC20 411 | IC20 412 | IC20 413 | IC20 414 | IC20 415 | IC20 416 | IC20 417 | IC20 418 | IC20 419 | IC20 420 | IC20 421 | IC20 422 | IC20 423 | IC20 424 | IC20 425 | IC20 426 | IC20 427 | IC20 428 | IC20 429 | IC20 430 | IC20 431 | IC20 432 | IC20 433 | IC20 434 | IC20 435 | IC20 436 | IC20 437 | IC20 438 | IC20 439 | IC20 440 | IC20 441 | IC20 442 | IC20 443 | IC20 444 | IC20 445 | IC20 446 | IC20 447 | IC20 448 | IC20 449 | IC20 450 | IC20 451 | IC20 452 | IC20 453 | IC20 454 | IC20 455 | IC20 456 | IC20 457 | IC20 458 | IC20 459 | IC20 460 | IC20 461 | IC20 462 | IC20 463 | IC20 464 | IC20 465 | IC20 466 | IC20 467 | IC20 468 | IC20 469 | IC20 470 | IC20 471 | IC20 472 | IC20 473 | IC20 474 | IC20 475 | IC20 476 | IC20 477 | IC20 478 | IC20 479 | IC20 480 | IC20 481 | IC20 482 | IC20 483 | IC20 484 | IC20 485 | IC20 486 | IC20 487 | IC20 488 | IC20 489 | IC20 490 | IC20 491 | IC20 492 | IC20 493 | IC20 494 | IC20 495 | IC20 496 | IC20 497 | IC20 498 | IC20 499 | IC20 500 | IC20 501 | IC20 502 | IC20 503 | IC20 504 | IC20 505 | IC20 506 | IC20 507 | IC20 508 | IC20 509 | IC20 510 | IC20 511 | IC20 512 | IC20 513 | IC20 514 | IC20 515 | IC20 516 | IC20 517 | IC20 518 | IC20 519 | IC20 520 | IC20 521 | IC20 522 | IC20 523 | IC20 524 | IC20 525 | IC20 526 | IC20 527 | IC20 528 | IC20 529 | IC20 530 | IC20 531 | IC20 532 | IC20 533 | IC20 534 | IC20 535 | IC20 536 | IC20 537 | IC20 538 | IC20 539 | IC20 540 | IC20 541 | IC20 542 | IC20 543 | IC20 544 | IC20 545 | IC20 546 | IC20 547 | IC20 548 | IC20 549 | IC20 550 | IC20 551 | IC20 552 | IC20 553 | IC20 554 | IC20 555 | IC20 556 | IC20 557 | IC20 558 | IC20 559 | IC20 560 | IC20 561 | IC20 562 | IC20 563 | IC20 564 | IC20 565 | IC20 566 | IC20 567 | IC20 568 | IC20 569 | IC20 570 | IC20 571 | IC20 572 | IC20 573 | IC20 574 | IC20 575 | IC20 576 | IC20 577 | IC20 578 | IC20 579 | IC20 580 | IC20 581 | IC20 582 | IC20 583 | IC20 584 | IC20 585 | IC20 586 | IC20 587 | IC20 588 | IC20 589 | IC20 590 | IC20 591 | IC20 592 | IC20 593 | IC20 594 | IC20 595 | IC20 596 | IC20 597 | IC20 598 | IC20 599 | IC20 600 | IC20 601 | IC20 602 | IC20 603 | IC20 604 | IC20 605 | IC20 606 | IC20 607 | IC20 608 | IC20 609 | IC20 610 | IC20 611 | IC20 612 | IC20 613 | IC20 614 | IC20 615 | IC20 616 | IC20 617 | IC20 618 | IC20 619 | IC20 620 | IC20 621 | IC20 622 | IC20 623 | IC20 624 | IC20 625 | IC20 626 | IC20 627 | IC20 628 | IC20 629 | IC20 630 | IC20 631 | IC20 632 | IC20 633 | IC20 634 | IC20 635 | IC20 636 | IC20 637 | IC20 638 | IC20 639 | IC20 640 | IC20 641 | IC20 642 | IC20 643 | IC20 644 | IC20 645 | IC20 646 | IC20 647 | IC20 648 | IC20 649 | IC20 650 | IC20 651 | IC20 652 | IC20 653 | IC20 654 | IC20 655 | IC20 656 | IC20 657 | IC20 658 | IC20 659 | IC20 660 | IC20 661 | IC20 662 | IC20 663 | IC20 664 | IC20 665 | IC20 666 | IC20 667 | IC20 668 | IC20 669 | IC20 670 | IC20 671 | IC20 672 | IC20 673 | IC20 674 | IC20 675 | IC20 676 | IC20 677 | IC20 678 | IC20 679 | IC20 680 | IC20 681 | IC20 682 | IC20 683 | IC20 684 | IC20 685 | IC20 686 | IC20 687 | IC20 688 | IC20 689 | IC20 690 | IC20 691 | IC20 692 | IC20 693 | IC20 694 | IC20 695 | IC20 696 | IC20 697 | IC20 698 | IC20 699 | IC20 700 | IC20 701 | IC20 702 | IC20 703 | IC20 704 | IC20 705 | IC20 706 | IC20 707 | IC20 708 | IC20 709 | IC20 710 | IC20 711 | IC20 712 | IC20 713 | IC20 714 | IC20 715 | IC20 716 | IC20 717 | IC20 718 | IC20 719 | IC20 720 | IC20 721 | IC20 722 | IC20 723 | IC20 724 | IC20 725 | IC20 726 | IC20 727 | IC20 728 | IC20 729 | IC20 730 | IC20 731 | IC20 732 | IC20 733 | IC20 734 | IC20 735 | IC20 736 | IC20 737 | IC20 738 | IC20 739 | IC20 740 | IC20 741 | IC20 742 | IC20 743 | IC20 744 | IC20 745 | IC20 746 | IC20 747 | IC20 748 | IC20 749 | IC20 750 | IC20 751 | IC20 752 | IC20 753 | IC20 754 | IC20 755 | IC20 756 | IC20 757 | IC20 758 | IC20 759 | IC20 760 | IC20 761 | IC20 762 | IC20 763 | IC20 764 | IC20 765 | IC20 766 | IC20 767 | IC20 768 | IC20 769 | IC20 770 | IC20 771 | IC20 772 | IC20 773 | IC20 774 | IC20 775 | IC20 776 | IC20 777 | IC20 778 | IC20 779 | IC20 780 | IC20 781 | IC20 782 | IC20 783 | IC20 784 | IC20 785 | IC20 786 | IC20 787 | IC20 788 | IC20 789 | IC20 790 | IC20 791 | IC20 792 | IC20 793 | IC20 794 | IC20 795 | IC20 796 | IC20 797 | IC20 798 | IC20 799 | IC20 800 | IC20 801 | IC20 802 | IC20 803 | IC20 804 | IC20 805 | IC20 806 | IC20 807 | IC20 808 | IC20 809 | IC20 810 | IC20 811 | IC20 812 | IC20 813 | IC20 814 | IC20 815 | IC20 816 | IC20 817 | IC20 818 | IC20 819 | IC20 820 | IC20 821 | IC20 822 | IC20 823 | IC20 824 | IC20 825 | IC20 826 | IC20 827 | IC20 828 | IC20 829 | IC20 830 | IC20 831 | IC20 832 | IC20 833 | IC20 834 | IC20 835 | IC20 836 | IC20 837 | IC20 838 | IC20 839 | IC20 840 | IC20 841 | IC20 842 | IC20 843 | IC20 844 | IC20 845 | IC20 846 | IC20 847 | IC20 848 | IC20 849 | IC20 850 | IC20 851 | IC20 852 | IC20 853 | IC20 854 | IC20 855 | IC20 856 | IC20 857 | IC20 858 | IC20 859 | IC20 860 | IC20 861 | IC20 862 | IC20 863 | IC20 864 | IC20 865 | IC20 866 | IC20 867 | IC20 868 | IC20 869 | IC20 870 | IC20 871 | IC20 872 | IC20 873 | IC20 874 | IC20 875 | IC20 876 | IC20 877 | IC20 878 | IC20 879 | IC20 880 | IC20 881 | IC20 882 | IC20 883 | IC20 884 | IC20 885 | IC20 886 | IC20 887 | IC20 888 | IC20 889 | IC20 890 | IC20 891 | IC20 892 | IC20 893 | IC20 894 | IC20 895 | IC20 896 | IC20 897 | IC20 898 | IC20 899 | IC20 900 | IC20 901 | IC20 902 | IC20 903 | IC20 904 | IC20 905 | IC20 906 | IC20 907 | IC20 908 | IC20 909 | IC20 910 | IC20 911 | IC20 912 | IC20 913 | IC20 914 | IC20 915 | IC20 916 | IC20 917 | IC20 918 | IC20 919 | IC20 920 | IC20 921 | IC20 922 | IC20 923 | IC20 924 | IC20 925 | IC20 926 | IC20 927 | IC20 928 | IC20 929 | IC20 930 | IC20 931 | IC20 932 | IC20 933 | IC20 934 | IC20 935 | IC20 936 | IC20 937 | IC20 938 | IC20 939 | IC20 940 | IC20 941 | IC20 942 | IC20 943 | IC20 944 | IC20 945 | IC20 946 | IC20 947 | IC20 948 | IC20 949 | IC20 950 | IC20 951 | IC20 952 | IC20 953 | IC20 954 | IC20 955 | IC20 956 | IC20 957 | IC20 958 | IC20 959 | IC20 960 | IC20 961 | IC20 962 | IC20 963 | IC20 964 | IC20 965 | IC20 966 | IC20 967 | IC20 968 | IC20 969 | IC20 970 | IC20 971 | IC20 972 | IC20 973 | IC20 974 | IC20 975 | IC20 976 | IC20 977 | IC20 978 | IC20 979 | IC20 980 | IC20 981 | IC20 982 | IC20 983 | IC20 984 | IC20 985 | IC20 986 | IC20 987 | IC20 988 | IC20 989 | IC20 990 | IC20 991 | IC20 992 | IC20 993 | IC20 994 | IC20 995 | IC20 996 | IC20 997 | IC20 998 | IC20 999 | IC20 1000 | IC20 1001 | IC20 1002 | IC20 1003 | IC20 1004 | IC20 1005 | IC20 1006 | IC20 1007 | IC20 1008 | IC20 1009 | IC20 1010 | IC20 1011 | IC20 1012 | IC20 1013 | IC20 1014 | IC20 1015 | IC20 1016 | IC20 1017 | IC20 1018 | IC20 1019 | IC20 1020 | IC20 1021 | IC20 1022 | IC20 1023 | IC20 1024 | IC20 1025 | IC20 1026 | IC20 1027 | IC20 1028 | IC20 1029 | IC20 1030 | IC20 1031 | IC20 1032 | IC20 1033 | IC20 |
|--------------|---------|------------|------------|------------|---------|---------|---------|---------|---------|---------|---------|---------|---------|---------|---------|---------|---------|---------|---------|---------|---------|---------|---------|---------|---------|---------|---------|---------|---------|---------|---------|---------|---------|---------|---------|---------|---------|---------|---------|---------|---------|---------|---------|---------|---------|---------|---------|---------|---------|---------|---------|---------|---------|---------|---------|---------|---------|---------|---------|---------|---------|---------|---------|---------|---------|---------|---------|---------|---------|---------|---------|---------|---------|---------|---------|---------|---------|---------|---------|---------|---------|---------|---------|---------|---------|---------|---------|---------|---------|---------|---------|---------|---------|---------|---------|---------|---------|---------|---------|---------|---------|---------|---------|----------|----------|----------|----------|----------|----------|----------|----------|----------|----------|----------|----------|----------|----------|----------|----------|----------|----------|----------|----------|----------|----------|----------|----------|----------|----------|----------|----------|----------|----------|----------|----------|----------|----------|----------|----------|----------|----------|----------|----------|----------|----------|----------|----------|----------|----------|----------|----------|----------|----------|----------|----------|----------|----------|----------|----------|----------|----------|----------|----------|----------|----------|----------|----------|----------|----------|----------|----------|----------|----------|----------|----------|----------|----------|----------|----------|----------|----------|----------|----------|----------|----------|----------|----------|----------|----------|----------|----------|----------|----------|----------|----------|----------|----------|----------|----------|----------|----------|----------|----------|----------|----------|----------|----------|----------|----------|----------|----------|----------|----------|----------|----------|----------|----------|----------|----------|----------|----------|----------|----------|----------|----------|----------|----------|----------|----------|----------|----------|----------|----------|----------|----------|----------|----------|----------|----------|----------|----------|----------|----------|----------|----------|----------|----------|----------|----------|----------|----------|----------|----------|----------|----------|----------|----------|----------|----------|----------|----------|----------|----------|----------|----------|----------|----------|----------|----------|----------|----------|----------|----------|----------|----------|----------|----------|----------|----------|----------|----------|----------|----------|----------|----------|----------|----------|----------|----------|----------|----------|----------|----------|----------|----------|----------|----------|----------|----------|----------|----------|----------|----------|----------|----------|----------|----------|----------|----------|----------|----------|----------|----------|----------|----------|----------|----------|----------|----------|----------|----------|----------|----------|----------|----------|----------|----------|----------|----------|----------|----------|----------|----------|----------|----------|----------|----------|----------|----------|----------|----------|----------|----------|----------|----------|----------|----------|----------|----------|----------|----------|----------|----------|----------|----------|----------|----------|----------|----------|----------|----------|----------|----------|----------|----------|----------|----------|----------|----------|----------|----------|----------|----------|----------|----------|----------|----------|----------|----------|----------|----------|----------|----------|----------|----------|----------|----------|----------|----------|----------|----------|----------|----------|----------|----------|----------|----------|----------|----------|----------|----------|----------|----------|----------|----------|----------|----------|----------|----------|----------|----------|----------|----------|----------|----------|----------|----------|----------|----------|----------|----------|----------|----------|----------|----------|----------|----------|----------|----------|----------|----------|----------|----------|----------|----------|----------|----------|----------|----------|----------|----------|----------|----------|----------|----------|----------|----------|----------|----------|----------|----------|----------|----------|----------|----------|----------|----------|----------|----------|----------|----------|----------|----------|----------|----------|----------|----------|----------|----------|----------|----------|----------|----------|----------|----------|----------|----------|----------|----------|----------|----------|----------|----------|----------|----------|----------|----------|----------|----------|----------|----------|----------|----------|----------|----------|----------|----------|----------|----------|----------|----------|----------|----------|----------|----------|----------|----------|----------|----------|----------|----------|----------|----------|----------|----------|----------|----------|----------|----------|----------|----------|----------|----------|----------|----------|----------|----------|----------|----------|----------|----------|----------|----------|----------|----------|----------|----------|----------|----------|----------|----------|----------|----------|----------|----------|----------|----------|----------|----------|----------|----------|----------|----------|----------|----------|----------|----------|----------|----------|----------|----------|----------|----------|----------|----------|----------|----------|----------|----------|----------|----------|----------|----------|----------|----------|----------|----------|----------|----------|----------|----------|----------|----------|----------|----------|----------|----------|----------|----------|----------|----------|----------|----------|----------|----------|----------|----------|----------|----------|----------|----------|----------|----------|----------|----------|----------|----------|----------|----------|----------|----------|----------|----------|----------|----------|----------|----------|----------|----------|----------|----------|----------|----------|----------|----------|----------|----------|----------|----------|----------|----------|----------|----------|----------|----------|----------|----------|----------|----------|----------|----------|----------|----------|----------|----------|----------|----------|----------|----------|----------|----------|----------|----------|----------|----------|----------|----------|----------|----------|----------|----------|----------|----------|----------|----------|----------|----------|----------|----------|----------|----------|----------|----------|----------|----------|----------|----------|----------|----------|----------|----------|----------|----------|----------|----------|----------|----------|----------|----------|----------|----------|----------|----------|----------|----------|----------|----------|----------|----------|----------|----------|----------|----------|----------|----------|----------|----------|----------|----------|----------|----------|----------|----------|----------|----------|----------|----------|----------|----------|----------|----------|----------|----------|----------|----------|----------|----------|----------|----------|----------|----------|----------|----------|----------|----------|----------|----------|----------|----------|----------|----------|----------|----------|----------|----------|----------|----------|----------|----------|----------|----------|----------|----------|----------|----------|----------|----------|----------|----------|----------|----------|----------|----------|----------|----------|----------|----------|----------|----------|----------|----------|----------|----------|----------|----------|----------|----------|----------|----------|----------|----------|----------|----------|----------|----------|----------|----------|----------|----------|----------|----------|----------|----------|----------|----------|----------|----------|----------|----------|----------|----------|----------|----------|----------|----------|----------|----------|----------|----------|----------|----------|----------|----------|----------|----------|----------|----------|----------|----------|----------|----------|----------|----------|----------|----------|----------|----------|----------|----------|----------|----------|----------|----------|----------|----------|----------|----------|----------|----------|----------|----------|----------|----------|----------|----------|----------|----------|----------|----------|----------|----------|----------|----------|----------|----------|----------|----------|----------|----------|----------|----------|----------|----------|----------|----------|----------|----------|----------|----------|----------|----------|----------|----------|----------|----------|----------|----------|----------|----------|----------|----------|----------|----------|----------|----------|----------|----------|----------|----------|----------|----------|----------|----------|----------|----------|----------|----------|----------|----------|----------|----------|----------|----------|----------|----------|----------|----------|----------|----------|----------|----------|----------|----------|----------|----------|----------|----------|----------|----------|----------|----------|----------|----------|----------|----------|----------|----------|----------|----------|----------|----------|----------|----------|----------|----------|----------|----------|----------|----------|----------|----------|----------|----------|----------|----------|----------|----------|----------|----------|----------|----------|----------|----------|----------|----------|----------|----------|----------|----------|----------|----------|----------|----------|----------|----------|----------|----------|----------|----------|----------|----------|----------|----------|----------|----------|----------|----------|----------|----------|----------|----------|----------|----------|----------|----------|----------|----------|----------|----------|----------|----------|----------|----------|----------|----------|----------|----------|----------|----------|----------|----------|----------|----------|-----------|-----------|-----------|-----------|-----------|-----------|-----------|-----------|-----------|-----------|-----------|-----------|-----------|-----------|-----------|-----------|-----------|-----------|-----------|-----------|-----------|-----------|-----------|-----------|-----------|-----------|-----------|-----------|-----------|-----------|-----------|-----------|-----------|-----------|------|
|--------------|---------|------------|------------|------------|---------|---------|---------|---------|---------|---------|---------|---------|---------|---------|---------|---------|---------|---------|---------|---------|---------|---------|---------|---------|---------|---------|---------|---------|---------|---------|---------|---------|---------|---------|---------|---------|---------|---------|---------|---------|---------|---------|---------|---------|---------|---------|---------|---------|---------|---------|---------|---------|---------|---------|---------|---------|---------|---------|---------|---------|---------|---------|---------|---------|---------|---------|---------|---------|---------|---------|---------|---------|---------|---------|---------|---------|---------|---------|---------|---------|---------|---------|---------|---------|---------|---------|---------|---------|---------|---------|---------|---------|---------|---------|---------|---------|---------|---------|---------|---------|---------|---------|---------|----------|----------|----------|----------|----------|----------|----------|----------|----------|----------|----------|----------|----------|----------|----------|----------|----------|----------|----------|----------|----------|----------|----------|----------|----------|----------|----------|----------|----------|----------|----------|----------|----------|----------|----------|----------|----------|----------|----------|----------|----------|----------|----------|----------|----------|----------|----------|----------|----------|----------|----------|----------|----------|----------|----------|----------|----------|----------|----------|----------|----------|----------|----------|----------|----------|----------|----------|----------|----------|----------|----------|----------|----------|----------|----------|----------|----------|----------|----------|----------|----------|----------|----------|----------|----------|----------|----------|----------|----------|----------|----------|----------|----------|----------|----------|----------|----------|----------|----------|----------|----------|----------|----------|----------|----------|----------|----------|----------|----------|----------|----------|----------|----------|----------|----------|----------|----------|----------|----------|----------|----------|----------|----------|----------|----------|----------|----------|----------|----------|----------|----------|----------|----------|----------|----------|----------|----------|----------|----------|----------|----------|----------|----------|----------|----------|----------|----------|----------|----------|----------|----------|----------|----------|----------|----------|----------|----------|----------|----------|----------|----------|----------|----------|----------|----------|----------|----------|----------|----------|----------|----------|----------|----------|----------|----------|----------|----------|----------|----------|----------|----------|----------|----------|----------|----------|----------|----------|----------|----------|----------|----------|----------|----------|----------|----------|----------|----------|----------|----------|----------|----------|----------|----------|----------|----------|----------|----------|----------|----------|----------|----------|----------|----------|----------|----------|----------|----------|----------|----------|----------|----------|----------|----------|----------|----------|----------|----------|----------|----------|----------|----------|----------|----------|----------|----------|----------|----------|----------|----------|----------|----------|----------|----------|----------|----------|----------|----------|----------|----------|----------|----------|----------|----------|----------|----------|----------|----------|----------|----------|----------|----------|----------|----------|----------|----------|----------|----------|----------|----------|----------|----------|----------|----------|----------|----------|----------|----------|----------|----------|----------|----------|----------|----------|----------|----------|----------|----------|----------|----------|----------|----------|----------|----------|----------|----------|----------|----------|----------|----------|----------|----------|----------|----------|----------|----------|----------|----------|----------|----------|----------|----------|----------|----------|----------|----------|----------|----------|----------|----------|----------|----------|----------|----------|----------|----------|----------|----------|----------|----------|----------|----------|----------|----------|----------|----------|----------|----------|----------|----------|----------|----------|----------|----------|----------|----------|----------|----------|----------|----------|----------|----------|----------|----------|----------|----------|----------|----------|----------|----------|----------|----------|----------|----------|----------|----------|----------|----------|----------|----------|----------|----------|----------|----------|----------|----------|----------|----------|----------|----------|----------|----------|----------|----------|----------|----------|----------|----------|----------|----------|----------|----------|----------|----------|----------|----------|----------|----------|----------|----------|----------|----------|----------|----------|----------|----------|----------|----------|----------|----------|----------|----------|----------|----------|----------|----------|----------|----------|----------|----------|----------|----------|----------|----------|----------|----------|----------|----------|----------|----------|----------|----------|----------|----------|----------|----------|----------|----------|----------|----------|----------|----------|----------|----------|----------|----------|----------|----------|----------|----------|----------|----------|----------|----------|----------|----------|----------|----------|----------|----------|----------|----------|----------|----------|----------|----------|----------|----------|----------|----------|----------|----------|----------|----------|----------|----------|----------|----------|----------|----------|----------|----------|----------|----------|----------|----------|----------|----------|----------|----------|----------|----------|----------|----------|----------|----------|----------|----------|----------|----------|----------|----------|----------|----------|----------|----------|----------|----------|----------|----------|----------|----------|----------|----------|----------|----------|----------|----------|----------|----------|----------|----------|----------|----------|----------|----------|----------|----------|----------|----------|----------|----------|----------|----------|----------|----------|----------|----------|----------|----------|----------|----------|----------|----------|----------|----------|----------|----------|----------|----------|----------|----------|----------|----------|----------|----------|----------|----------|----------|----------|----------|----------|----------|----------|----------|----------|----------|----------|----------|----------|----------|----------|----------|----------|----------|----------|----------|----------|----------|----------|----------|----------|----------|----------|----------|----------|----------|----------|----------|----------|----------|----------|----------|----------|----------|----------|----------|----------|----------|----------|----------|----------|----------|----------|----------|----------|----------|----------|----------|----------|----------|----------|----------|----------|----------|----------|----------|----------|----------|----------|----------|----------|----------|----------|----------|----------|----------|----------|----------|----------|----------|----------|----------|----------|----------|----------|----------|----------|----------|----------|----------|----------|----------|----------|----------|----------|----------|----------|----------|----------|----------|----------|----------|----------|----------|----------|----------|----------|----------|----------|----------|----------|----------|----------|----------|----------|----------|----------|----------|----------|----------|----------|----------|----------|----------|----------|----------|----------|----------|----------|----------|----------|----------|----------|----------|----------|----------|----------|----------|----------|----------|----------|----------|----------|----------|----------|----------|----------|----------|----------|----------|----------|----------|----------|----------|----------|----------|----------|----------|----------|----------|----------|----------|----------|----------|----------|----------|----------|----------|----------|----------|----------|----------|----------|----------|----------|----------|----------|----------|----------|----------|----------|----------|----------|----------|----------|----------|----------|----------|----------|----------|----------|----------|----------|----------|----------|----------|----------|----------|----------|----------|----------|----------|----------|----------|----------|----------|----------|----------|----------|----------|----------|----------|----------|----------|----------|----------|----------|----------|----------|----------|----------|----------|----------|----------|----------|----------|----------|----------|----------|----------|----------|----------|----------|----------|----------|----------|----------|----------|----------|----------|----------|----------|----------|----------|----------|----------|----------|----------|----------|----------|----------|----------|----------|----------|----------|----------|----------|----------|----------|----------|----------|----------|----------|----------|----------|----------|----------|----------|----------|----------|----------|----------|----------|----------|----------|----------|----------|----------|----------|----------|----------|----------|----------|----------|----------|----------|----------|----------|----------|----------|----------|----------|----------|----------|----------|----------|----------|----------|----------|----------|----------|----------|----------|----------|----------|----------|----------|----------|----------|----------|----------|----------|----------|----------|----------|----------|----------|----------|----------|----------|----------|----------|----------|----------|----------|----------|----------|----------|----------|----------|----------|----------|----------|----------|----------|----------|----------|----------|----------|----------|----------|----------|----------|----------|----------|----------|----------|----------|----------|----------|-----------|-----------|-----------|-----------|-----------|-----------|-----------|-----------|-----------|-----------|-----------|-----------|-----------|-----------|-----------|-----------|-----------|-----------|-----------|-----------|-----------|-----------|-----------|-----------|-----------|-----------|-----------|-----------|-----------|-----------|-----------|-----------|-----------|-----------|------|







Supplementary Table S1. Overview on the abundance of all relatively quantified 1180 proteins

|  |  | MCF-7 |  | control |  | control |  | Dai IC20 01 |  | Dai IC20 02 |  | Dai IC20 03 |  | Dai IC20 04 |  | Dai IC20 05 |  | Dai IC20 06 |  | Dai IC20 07 |  | Dai IC20 08 |  | Dai IC20 09 |  | Dai IC20 10 |  | Dai IC20 11 |  | Dai IC20 12 |  | Dai IC20 13 |  | Dai IC20 14 |  | Dai IC20 15 |  | Dai IC20 16 |  | Dai IC20 17 |  | Dai IC20 18 |  | Dai IC20 19 |  | Dai IC20 20 |  | Dai IC20 21 |  | Dai IC20 22 |  | Dai IC20 23 |  | Dai IC20 24 |  | Dai IC20 25 |  | Dai IC20 26 |  | Dai IC20 27 |  | Dai IC20 28 |  | Dai IC20 29 |  | Dai IC20 30 |  | Dai IC20 31 |  | Dai IC20 32 |  | Dai IC20 33 |  | Dai IC20 34 |  | Dai IC20 35 |  | Dai IC20 36 |  | Dai IC20 37 |  | Dai IC20 38 |  | Dai IC20 39 |  | Dai IC20 40 |  | Dai IC20 41 |  | Dai IC20 42 |  | Dai IC20 43 |  | Dai IC20 44 |  | Dai IC20 45 |  | Dai IC20 46 |  | Dai IC20 47 |  | Dai IC20 48 |  | Dai IC20 49 |  | Dai IC20 50 |  | Dai IC20 51 |  | Dai IC20 52 |  | Dai IC20 53 |  | Dai IC20 54 |  | Dai IC20 55 |  | Dai IC20 56 |  | Dai IC20 57 |  | Dai IC20 58 |  | Dai IC20 59 |  | Dai IC20 60 |  | Dai IC20 61 |  | Dai IC20 62 |  | Dai IC20 63 |  | Dai IC20 64 |  | Dai IC20 65 |  | Dai IC20 66 |  | Dai IC20 67 |  | Dai IC20 68 |  | Dai IC20 69 |  | Dai IC20 70 |  | Dai IC20 71 |  | Dai IC20 72 |  | Dai IC20 73 |  | Dai IC20 74 |  | Dai IC20 75 |  | Dai IC20 76 |  | Dai IC20 77 |  | Dai IC20 78 |  | Dai IC20 79 |  | Dai IC20 80 |  | Dai IC20 81 |  | Dai IC20 82 |  | Dai IC20 83 |  | Dai IC20 84 |  | Dai IC20 85 |  | Dai IC20 86 |  | Dai IC20 87 |  | Dai IC20 88 |  | Dai IC20 89 |  | Dai IC20 90 |  | Dai IC20 91 |  | Dai IC20 92 |  | Dai IC20 93 |  | Dai IC20 94 |  | Dai IC20 95 |  | Dai IC20 96 |  | Dai IC20 97 |  | Dai IC20 98 |  | Dai IC20 99 |  | Dai IC20 100 |  | Dai IC20 101 |  | Dai IC20 102 |  | Dai IC20 103 |  | Dai IC20 104 |  | Dai IC20 105 |  | Dai IC20 106 |  | Dai IC20 107 |  | Dai IC20 108 |  | Dai IC20 109 |  | Dai IC20 110 |  | Dai IC20 111 |  | Dai IC20 112 |  | Dai IC20 113 |  | Dai IC20 114 |  | Dai IC20 115 |  | Dai IC20 116 |  | Dai IC20 117 |  | Dai IC20 118 |  | Dai IC20 119 |  | Dai IC20 120 |  | Dai IC20 121 |  | Dai IC20 122 |  | Dai IC20 123 |  | Dai IC20 124 |  | Dai IC20 125 |  | Dai IC20 126 |  | Dai IC20 127 |  | Dai IC20 128 |  | Dai IC20 129 |  | Dai IC20 130 |  | Dai IC20 131 |  | Dai IC20 132 |  | Dai IC20 133 |  | Dai IC20 134 |  | Dai IC20 135 |  | Dai IC20 136 |  | Dai IC20 137 |  | Dai IC20 138 |  | Dai IC20 139 |  | Dai IC20 140 |  | Dai IC20 141 |  | Dai IC20 142 |  | Dai IC20 143 |  | Dai IC20 144 |  | Dai IC20 145 |  | Dai IC20 146 |  | Dai IC20 147 |  | Dai IC20 148 |  | Dai IC20 149 |  | Dai IC20 150 |  | Dai IC20 151 |  | Dai IC20 152 |  | Dai IC20 153 |  | Dai IC20 154 |  | Dai IC20 155 |  | Dai IC20 156 |  | Dai IC20 157 |  | Dai IC20 158 |  | Dai IC20 159 |  | Dai IC20 160 |  | Dai IC20 161 |  | Dai IC20 162 |  | Dai IC20 163 |  | Dai IC20 164 |  | Dai IC20 165 |  | Dai IC20 166 |  | Dai IC20 167 |  | Dai IC20 168 |  | Dai IC20 169 |  | Dai IC20 170 |  | Dai IC20 171 |  | Dai IC20 172 |  | Dai IC20 173 |  | Dai IC20 174 |  | Dai IC20 175 |  | Dai IC20 176 |  | Dai IC20 177 |  | Dai IC20 178 |  | Dai IC20 179 |  | Dai IC20 180 |  | Dai IC20 181 |  | Dai IC20 182 |  | Dai IC20 183 |  | Dai IC20 184 |  | Dai IC20 185 |  | Dai IC20 186 |  | Dai IC20 187 |  | Dai IC20 188 |  | Dai IC20 189 |  | Dai IC20 190 |  | Dai IC20 191 |  | Dai IC20 192 |  | Dai IC20 193 |  | Dai IC20 194 |  | Dai IC20 195 |  | Dai IC20 196 |  | Dai IC20 197 |  | Dai IC20 198 |  | Dai IC20 199 |  | Dai IC20 200 |  | Dai IC20 201 |  | Dai IC20 202 |  | Dai IC20 203 |  | Dai IC20 204 |  | Dai IC20 205 |  | Dai IC20 206 |  | Dai IC20 207 |  | Dai IC20 208 |  | Dai IC20 209 |  | Dai IC20 210 |  | Dai IC20 211 |  | Dai IC20 212 |  | Dai IC20 213 |  | Dai IC20 214 |  | Dai IC20 215 |  | Dai IC20 216 |  | Dai IC20 217 |  | Dai IC20 218 |  | Dai IC20 219 |  | Dai IC20 220 |  | Dai IC20 221 |  | Dai IC20 222 |  | Dai IC20 223 |  | Dai IC20 224 |  | Dai IC20 225 |  | Dai IC20 226 |  | Dai IC20 227 |  | Dai IC20 228 |  | Dai IC20 229 |  | Dai IC20 230 |  | Dai IC20 231 |  | Dai IC20 232 |  | Dai IC20 233 |  | Dai IC20 234 |  | Dai IC20 235 |  | Dai IC20 236 |  | Dai IC20 237 |  | Dai IC20 238 |  | Dai IC20 239 |  | Dai IC20 240 |  | Dai IC20 241 |  | Dai IC20 242 |  | Dai IC20 243 |  | Dai IC20 244 |  | Dai IC20 245 |  | Dai IC20 246 |  | Dai IC20 247 |  | Dai IC20 248 |  | Dai IC20 249 |  | Dai IC20 250 |  | Dai IC20 251 |  | Dai IC20 252 |  | Dai IC20 253 |  | Dai IC20 254 |  | Dai IC20 255 |  | Dai IC20 256 |  | Dai IC20 257 |  | Dai IC20 258 |  | Dai IC20 259 |  | Dai IC20 260 |  | Dai IC20 261 |  | Dai IC20 262 |  | Dai IC20 263 |  | Dai IC20 264 |  | Dai IC20 265 |  | Dai IC20 266 |  | Dai IC20 267 |  | Dai IC20 268 |  | Dai IC20 269 |  | Dai IC20 270 |  | Dai IC20 271 |  | Dai IC20 272 |  | Dai IC20 273 |  | Dai IC20 274 |  | Dai IC20 275 |  | Dai IC20 276 |  | Dai IC20 277 |  | Dai IC20 278 |  | Dai IC20 279 |  | Dai IC20 280 |  | Dai IC20 281 |  | Dai IC20 282 |  | Dai IC20 283 |  | Dai IC20 284 |  | Dai IC20 285 |  | Dai IC20 286 |  | Dai IC20 287 |  | Dai IC20 288 |  | Dai IC20 289 |  | Dai IC20 290 |  | Dai IC20 291 |  | Dai IC20 292 |  | Dai IC20 293 |  | Dai IC20 294 |  | Dai IC20 295 |  | Dai IC20 296 |  | Dai IC20 297 |  | Dai IC20 298 |  | Dai IC20 299 |  | Dai IC20 300 |  | Dai IC20 301 |  | Dai IC20 302 |  | Dai IC20 303 |  | Dai IC20 304 |  | Dai IC20 305 |  | Dai IC20 306 |  | Dai IC20 307 |  | Dai IC20 308 |  | Dai IC20 309 |  | Dai IC20 310 |  | Dai IC20 311 |  | Dai IC20 312 |  | Dai IC20 313 |  | Dai IC20 314 |  | Dai IC20 315 |  | Dai IC20 316 |  | Dai IC20 317 |  | Dai IC20 318 |  | Dai IC20 319 |  | Dai IC20 320 |  | Dai IC20 321 |  | Dai IC20 322 |  | Dai IC20 323 |  | Dai IC20 324 |  | Dai IC20 325 |  | Dai IC20 326 |  | Dai IC20 327 |  | Dai IC20 328 |  | Dai IC20 329 |  | Dai IC20 330 |  | Dai IC20 331 |  | Dai IC20 332 |  | Dai IC20 333 |  | Dai IC20 334 |  | Dai IC20 335 |  | Dai IC20 336 |  | Dai IC20 337 |  | Dai IC20 338 |  | Dai IC20 339 |  | Dai IC20 340 |  | Dai IC20 341 |  | Dai IC20 342 |  | Dai IC20 343 |  | Dai IC20 344 |  | Dai IC20 345 |  | Dai IC20 346 |  | Dai IC20 347 |  | Dai IC20 348 |  | Dai IC20 349 |  | Dai IC20 350 |  | Dai IC20 351 |  | Dai IC20 352 |  | Dai IC20 353 |  | Dai IC20 354 |  | Dai IC20 355 |  | Dai IC20 356 |  | Dai IC20 357 |  | Dai IC20 358 |  | Dai IC20 359 |  | Dai IC20 360 |  | Dai IC20 361 |  | Dai IC20 362 |  | Dai IC20 363 |  | Dai IC20 364 |  | Dai IC20 365 |  | Dai IC20 366 |  | Dai IC20 367 |  | Dai IC20 368 |  | Dai IC20 369 |  | Dai IC20 370 |  | Dai IC20 371 |  | Dai IC20 372 |  | Dai IC20 373 |  | Dai IC20 374 |  | Dai IC20 375 |  | Dai IC20 376 |  | Dai IC20 377 |  | Dai IC20 378 |  | Dai IC20 379 |  | Dai IC20 380 |  | Dai IC20 381 |  | Dai IC20 382 |  | Dai IC20 383 |  | Dai IC20 384 |  | Dai IC20 385 |  | Dai IC20 386 |  | Dai IC20 387 |  | Dai IC20 388 |  | Dai IC20 389 |  | Dai IC20 390 |  | Dai IC20 391 |  | Dai IC20 392 |  | Dai IC20 393 |  | Dai IC20 394 |  | Dai IC20 395 |  | Dai IC20 396 |  | Dai IC20 397 |  | Dai IC20 398 |  | Dai IC20 399 |  | Dai IC20 400 |  | Dai IC20 401 |  | Dai IC20 402 |  | Dai IC20 403 |  | Dai IC20 404 |  | Dai IC20 405 |  | Dai IC20 406 |  | Dai IC20 407 |  | Dai IC20 408 |  | Dai IC20 409 |  | Dai IC20 410 |  | Dai IC20 411 |  | Dai IC20 412 |  | Dai IC20 413 |  | Dai IC20 414 |  | Dai IC20 415 |  | Dai IC20 416 |  | Dai IC20 417 |  | Dai IC20 418 |  | Dai IC20 419 |  | Dai IC20 420 |  | Dai IC20 421 |  | Dai IC20 422 |  | Dai IC20 423 |  | Dai IC20 424 |  | Dai IC20 425 |  | Dai IC20 426 |  | Dai IC20 427 |  | Dai IC20 428 |  | Dai IC20 429 |  | Dai IC20 430 |  | Dai IC20 431 |  | Dai IC20 432 |  | Dai IC20 433 |  | Dai IC20 434 |  | Dai IC20 435 |  | Dai IC20 436 |  | Dai IC20 437 |  | Dai IC20 438 |  | Dai IC20 439 |  | Dai IC20 440 |  | Dai IC20 441 |  | Dai IC20 442 |  | Dai IC20 443 |  | Dai IC20 444 |  | Dai IC20 445 |  | Dai IC20 446 |  | Dai IC20 447 |  | Dai IC20 448 |  | Dai IC20 449 |  | Dai IC20 450 |  | Dai IC20 451 |  | Dai IC20 452 |  | Dai IC20 453 |  | Dai IC20 454 |  | Dai IC20 455 |  | Dai IC20 456 |  | Dai IC20 457 |  | Dai IC20 458 |  | Dai IC20 459 |  | Dai IC20 460 |  | Dai IC20 461 |  | Dai IC20 462 |  | Dai IC20 463 |  | Dai IC20 464 |  | Dai IC20 465 |  | Dai IC20 466 |  | Dai IC20 467 |  | Dai IC20 468 |  | Dai IC20 469 |  | Dai IC20 470 |  | Dai IC20 471 |  | Dai IC20 472 |  | Dai IC20 473 |  | Dai IC20 474 |  | Dai IC20 475 |  | Dai IC20 476 |  | Dai IC20 477 |  | Dai IC20 478 |  | Dai IC20 479 |  | Dai IC20 480 |  | Dai IC20 481 |  | Dai IC20 482 |  | Dai IC20 483 |  | Dai IC20 484 |  | Dai IC20 485 |  | Dai IC20 486 |  | Dai IC20 487 |  | Dai IC20 488 |  | Dai IC20 489 |  | Dai IC20 490 |  | Dai IC20 491 |  | Dai IC20 492 |  | Dai IC20 493 |  | Dai IC20 494 |  | Dai IC20 495 |  | Dai IC20 496 |  | Dai IC20 497 |  | Dai IC20 498 |  | Dai IC20 499 |  | Dai IC20 500 |  | Dai IC20 501 |  | Dai IC20 502 |  | Dai IC20 503 |  | Dai IC20 504 |  | Dai IC20 505 |  | Dai IC20 506 |  | Dai IC20 507 |  | Dai IC20 508 |  | Dai IC20 509 |  | Dai IC20 510 |  | Dai IC20 511 |  | Dai IC20 512 |  | Dai IC20 513 |  | Dai IC20 514 |  | Dai IC20 515 |  | Dai IC20 516 |  | Dai IC20 517 |  | Dai IC20 518 |  | Dai IC20 519 |  | Dai IC20 520 |  | Dai IC20 521 |  | Dai IC20 522 |  | Dai IC20 523 |  | Dai IC20 524 |  | Dai IC20 525 |  | Dai IC20 526 |  | Dai IC20 527 |  | Dai IC20 528 |  | Dai IC20 529 |  | Dai IC20 530 |  | Dai IC20 531 |  | Dai IC20 532 |  | Dai IC20 533 |  | Dai IC20 534 |  | Dai IC20 535 |  | Dai IC20 536 |  | Dai IC20 537 |  | Dai IC20 538 |  | Dai IC20 539 |  | Dai IC20 540 |  | Dai IC20 541 |  | Dai IC20 542 |  | Dai IC20 543 |  | Dai IC20 544 |  | Dai IC20 545 |  | Dai IC20 546 |  | Dai IC20 547 |  | Dai IC20 548 |  | Dai IC20 549 |  | Dai IC20 550 |  | Dai IC20 551 |  | Dai IC20 552 |  | Dai IC20 553 |  | Dai IC20 554 |  | Dai IC20 555 |  | Dai IC20 556 |  | Dai IC20 557 |  | Dai IC20 558 |  | Dai IC20 559 |  | Dai IC20 560 |  | Dai IC20 561 |  | Dai IC20 562 |  | Dai IC20 563 |  | Dai IC20 564 |  | Dai IC20 565 |  | Dai IC20 566 |  | Dai IC20 567 |  | Dai IC20 568 |  | Dai IC20 569 |  | Dai IC20 570 |  | Dai IC20 571 |  | Dai IC20 572 |  | Dai IC20 573 |  | Dai IC20 574 |  | Dai IC20 575 |  | Dai IC20 576 |  | Dai IC20 577 |  | Dai IC20 578 |  | Dai IC20 579 |  | Dai IC20 580 |  | Dai IC20 581 |  | Dai IC20 582 |  | Dai IC20 583 |  | Dai IC20 584 |  | Dai IC20 585 |  | Dai IC20 586 |  | Dai IC20 587 |  | Dai IC20 588 |  | Dai IC20 589 |  | Dai IC20 590 |  | Dai IC20 591 |  | Dai IC20 592 |  | Dai IC20 593 |  | Dai IC20 594 |  | Dai IC20 595 |  | Dai IC20 596 |  | Dai IC20 597 |  | Dai IC20 598 |  | Dai IC20 599 |  | Dai IC20 600 |  | Dai IC20 601 |  | Dai IC20 602 |  | Dai IC20 603 |  | Dai IC20 604 |  | Dai IC20 605 |  | Dai IC20 606 |  | Dai IC20 607 |  | Dai IC20 608 |  | Dai IC20 609 |  | Dai IC20 610 |  | Dai IC20 611 |  | Dai IC20 612 |  | Dai IC20 613 |  | Dai IC20 614 |  | Dai IC20 615 |  | Dai IC20 616 |  | Dai IC20 617 |  | Dai IC20 618 |  | Dai IC20 619 |  | Dai IC20 620 |  | Dai IC20 621 |  | Dai IC20 622 |  | Dai IC20 623 |  | Dai IC20 624 |  | Dai IC20 625 |  | Dai IC20 626 |  | Dai IC20 627 |  | Dai IC20 628 |  | Dai IC20 629 |  | Dai IC20 630 |  | Dai IC20 631 |  | Dai IC20 632 |  | Dai IC20 633 |  | Dai IC20 634 |  | Dai IC20 635 |  | Dai IC20 636 |  | Dai IC20 637 |  | Dai IC20 638 |  | Dai IC20 639 |  | Dai IC20 640 |  | Dai IC20 641 |  | Dai IC20 642 |  | Dai IC20 643 |  | Dai IC20 644 |  | Dai IC20 645 |  | Dai IC20 646 |  | Dai IC20 647 |  | Dai IC20 648 |  | Dai IC20 649 |  | Dai IC20 650 |  | Dai IC20 651 |  | Dai IC20 652 |  | Dai IC20 653 |  | Dai IC20 654 |  | Dai IC20 655 |  | Dai IC20 656 |  | Dai IC20 657 |  | Dai IC20 658 |  | Dai IC20 659 |  | Dai IC20 660 |  | Dai IC20 661 |  | Dai IC20 662 |  | Dai IC20 663 |  | Dai IC20 664 |  | Dai IC20 665 |  | Dai IC20 666 |  | Dai IC20 667 |  | Dai IC20 668 |  | Dai IC20 669 |  | Dai IC20 670 |  | Dai IC20 671 |  | Dai IC20 672 |  | Dai IC20 673 |  | Dai IC20 674 |  | Dai IC20 675 |  | Dai IC20 676 |  | Dai IC20 677 |  | Dai IC20 678 |  | Dai IC20 679 |  | Dai IC20 680 |  | Dai IC20 681 |  | Dai IC20 682 |  | Dai IC20 683 |  | Dai IC20 684 |  | Dai IC20 685 |  | Dai IC20 686 |  | Dai IC20 687 |  | Dai IC20 688 |  | Dai IC20 689 |  | Dai IC20 690 |  | Dai IC20 691 |  | Dai IC20 692 |  | Dai IC20 693 |  | Dai IC20 694 |  | Dai IC20 695 |  | Dai IC20 696 |  | Dai IC20 697 |  | Dai IC20 698 |  | Dai IC20 699 |  | Dai IC20 700 |  | Dai IC20 701 |  | Dai IC20 702 |  | Dai IC20 703 |  | Dai IC20 704 |  | Dai IC20 705 |  | Dai IC20 706 |  | Dai IC20 707 |  | Dai IC20 708 |  | Dai IC20 709 |  | Dai IC20 710 |  | Dai IC20 711 |  | Dai IC20 712 |  | Dai IC20 713 |  | Dai IC20 714 |  | Dai IC20 715 |  | Dai IC20 716 |  | Dai IC20 717 |  | Dai IC20 718 |  | Dai IC20 719 |  | Dai IC20 720 |  | Dai IC20 721 |  | Dai IC20 722 |  | Dai IC20 723 |  | Dai IC20 724 |  | Dai IC20 725 |  | Dai IC20 726 |  | Dai IC20 727 |  | Dai IC20 728 |  | Dai IC20 729 |  | Dai IC20 730 |  | Dai IC20 731 |  | Dai IC20 732</ |  |
|--|--|-------|--|---------|--|---------|--|-------------|--|-------------|--|-------------|--|-------------|--|-------------|--|-------------|--|-------------|--|-------------|--|-------------|--|-------------|--|-------------|--|-------------|--|-------------|--|-------------|--|-------------|--|-------------|--|-------------|--|-------------|--|-------------|--|-------------|--|-------------|--|-------------|--|-------------|--|-------------|--|-------------|--|-------------|--|-------------|--|-------------|--|-------------|--|-------------|--|-------------|--|-------------|--|-------------|--|-------------|--|-------------|--|-------------|--|-------------|--|-------------|--|-------------|--|-------------|--|-------------|--|-------------|--|-------------|--|-------------|--|-------------|--|-------------|--|-------------|--|-------------|--|-------------|--|-------------|--|-------------|--|-------------|--|-------------|--|-------------|--|-------------|--|-------------|--|-------------|--|-------------|--|-------------|--|-------------|--|-------------|--|-------------|--|-------------|--|-------------|--|-------------|--|-------------|--|-------------|--|-------------|--|-------------|--|-------------|--|-------------|--|-------------|--|-------------|--|-------------|--|-------------|--|-------------|--|-------------|--|-------------|--|-------------|--|-------------|--|-------------|--|-------------|--|-------------|--|-------------|--|-------------|--|-------------|--|-------------|--|-------------|--|-------------|--|-------------|--|-------------|--|-------------|--|-------------|--|-------------|--|-------------|--|-------------|--|-------------|--|-------------|--|-------------|--|--------------|--|--------------|--|--------------|--|--------------|--|--------------|--|--------------|--|--------------|--|--------------|--|--------------|--|--------------|--|--------------|--|--------------|--|--------------|--|--------------|--|--------------|--|--------------|--|--------------|--|--------------|--|--------------|--|--------------|--|--------------|--|--------------|--|--------------|--|--------------|--|--------------|--|--------------|--|--------------|--|--------------|--|--------------|--|--------------|--|--------------|--|--------------|--|--------------|--|--------------|--|--------------|--|--------------|--|--------------|--|--------------|--|--------------|--|--------------|--|--------------|--|--------------|--|--------------|--|--------------|--|--------------|--|--------------|--|--------------|--|--------------|--|--------------|--|--------------|--|--------------|--|--------------|--|--------------|--|--------------|--|--------------|--|--------------|--|--------------|--|--------------|--|--------------|--|--------------|--|--------------|--|--------------|--|--------------|--|--------------|--|--------------|--|--------------|--|--------------|--|--------------|--|--------------|--|--------------|--|--------------|--|--------------|--|--------------|--|--------------|--|--------------|--|--------------|--|--------------|--|--------------|--|--------------|--|--------------|--|--------------|--|--------------|--|--------------|--|--------------|--|--------------|--|--------------|--|--------------|--|--------------|--|--------------|--|--------------|--|--------------|--|--------------|--|--------------|--|--------------|--|--------------|--|--------------|--|--------------|--|--------------|--|--------------|--|--------------|--|--------------|--|--------------|--|--------------|--|--------------|--|--------------|--|--------------|--|--------------|--|--------------|--|--------------|--|--------------|--|--------------|--|--------------|--|--------------|--|--------------|--|--------------|--|--------------|--|--------------|--|--------------|--|--------------|--|--------------|--|--------------|--|--------------|--|--------------|--|--------------|--|--------------|--|--------------|--|--------------|--|--------------|--|--------------|--|--------------|--|--------------|--|--------------|--|--------------|--|--------------|--|--------------|--|--------------|--|--------------|--|--------------|--|--------------|--|--------------|--|--------------|--|--------------|--|--------------|--|--------------|--|--------------|--|--------------|--|--------------|--|--------------|--|--------------|--|--------------|--|--------------|--|--------------|--|--------------|--|--------------|--|--------------|--|--------------|--|--------------|--|--------------|--|--------------|--|--------------|--|--------------|--|--------------|--|--------------|--|--------------|--|--------------|--|--------------|--|--------------|--|--------------|--|--------------|--|--------------|--|--------------|--|--------------|--|--------------|--|--------------|--|--------------|--|--------------|--|--------------|--|--------------|--|--------------|--|--------------|--|--------------|--|--------------|--|--------------|--|--------------|--|--------------|--|--------------|--|--------------|--|--------------|--|--------------|--|--------------|--|--------------|--|--------------|--|--------------|--|--------------|--|--------------|--|--------------|--|--------------|--|--------------|--|--------------|--|--------------|--|--------------|--|--------------|--|--------------|--|--------------|--|--------------|--|--------------|--|--------------|--|--------------|--|--------------|--|--------------|--|--------------|--|--------------|--|--------------|--|--------------|--|--------------|--|--------------|--|--------------|--|--------------|--|--------------|--|--------------|--|--------------|--|--------------|--|--------------|--|--------------|--|--------------|--|--------------|--|--------------|--|--------------|--|--------------|--|--------------|--|--------------|--|--------------|--|--------------|--|--------------|--|--------------|--|--------------|--|--------------|--|--------------|--|--------------|--|--------------|--|--------------|--|--------------|--|--------------|--|--------------|--|--------------|--|--------------|--|--------------|--|--------------|--|--------------|--|--------------|--|--------------|--|--------------|--|--------------|--|--------------|--|--------------|--|--------------|--|--------------|--|--------------|--|--------------|--|--------------|--|--------------|--|--------------|--|--------------|--|--------------|--|--------------|--|--------------|--|--------------|--|--------------|--|--------------|--|--------------|--|--------------|--|--------------|--|--------------|--|--------------|--|--------------|--|--------------|--|--------------|--|--------------|--|--------------|--|--------------|--|--------------|--|--------------|--|--------------|--|--------------|--|--------------|--|--------------|--|--------------|--|--------------|--|--------------|--|--------------|--|--------------|--|--------------|--|--------------|--|--------------|--|--------------|--|--------------|--|--------------|--|--------------|--|--------------|--|--------------|--|--------------|--|--------------|--|--------------|--|--------------|--|--------------|--|--------------|--|--------------|--|--------------|--|--------------|--|--------------|--|--------------|--|--------------|--|--------------|--|--------------|--|--------------|--|--------------|--|--------------|--|--------------|--|--------------|--|--------------|--|--------------|--|--------------|--|--------------|--|--------------|--|--------------|--|--------------|--|--------------|--|--------------|--|--------------|--|--------------|--|--------------|--|--------------|--|--------------|--|--------------|--|--------------|--|--------------|--|--------------|--|--------------|--|--------------|--|--------------|--|--------------|--|--------------|--|--------------|--|--------------|--|--------------|--|--------------|--|--------------|--|--------------|--|--------------|--|--------------|--|--------------|--|--------------|--|--------------|--|--------------|--|--------------|--|--------------|--|--------------|--|--------------|--|--------------|--|--------------|--|--------------|--|--------------|--|--------------|--|--------------|--|--------------|--|--------------|--|--------------|--|--------------|--|--------------|--|--------------|--|--------------|--|--------------|--|--------------|--|--------------|--|--------------|--|--------------|--|--------------|--|--------------|--|--------------|--|--------------|--|--------------|--|--------------|--|--------------|--|--------------|--|--------------|--|--------------|--|--------------|--|--------------|--|--------------|--|--------------|--|--------------|--|--------------|--|--------------|--|--------------|--|--------------|--|--------------|--|--------------|--|--------------|--|--------------|--|--------------|--|--------------|--|--------------|--|--------------|--|--------------|--|--------------|--|--------------|--|--------------|--|--------------|--|--------------|--|--------------|--|--------------|--|--------------|--|--------------|--|--------------|--|--------------|--|--------------|--|--------------|--|--------------|--|--------------|--|--------------|--|--------------|--|--------------|--|--------------|--|--------------|--|--------------|--|--------------|--|--------------|--|--------------|--|--------------|--|--------------|--|--------------|--|--------------|--|--------------|--|--------------|--|--------------|--|--------------|--|--------------|--|--------------|--|--------------|--|--------------|--|--------------|--|--------------|--|--------------|--|--------------|--|--------------|--|--------------|--|--------------|--|--------------|--|--------------|--|--------------|--|--------------|--|--------------|--|--------------|--|--------------|--|--------------|--|--------------|--|--------------|--|--------------|--|--------------|--|--------------|--|--------------|--|--------------|--|--------------|--|--------------|--|--------------|--|--------------|--|--------------|--|--------------|--|--------------|--|--------------|--|--------------|--|--------------|--|--------------|--|--------------|--|--------------|--|--------------|--|--------------|--|--------------|--|--------------|--|--------------|--|--------------|--|--------------|--|--------------|--|--------------|--|--------------|--|--------------|--|--------------|--|--------------|--|--------------|--|--------------|--|--------------|--|--------------|--|--------------|--|--------------|--|--------------|--|--------------|--|--------------|--|--------------|--|--------------|--|--------------|--|--------------|--|--------------|--|--------------|--|--------------|--|--------------|--|--------------|--|--------------|--|--------------|--|--------------|--|--------------|--|--------------|--|--------------|--|--------------|--|--------------|--|--------------|--|--------------|--|--------------|--|--------------|--|--------------|--|--------------|--|--------------|--|--------------|--|--------------|--|--------------|--|--------------|--|--------------|--|--------------|--|--------------|--|--------------|--|--------------|--|--------------|--|--------------|--|--------------|--|--------------|--|--------------|--|--------------|--|--------------|--|--------------|--|--------------|--|--------------|--|--------------|--|--------------|--|--------------|--|--------------|--|--------------|--|--------------|--|--------------|--|--------------|--|--------------|--|--------------|--|--------------|--|--------------|--|--------------|--|--------------|--|--------------|--|--------------|--|--------------|--|--------------|--|--------------|--|--------------|--|--------------|--|--------------|--|--------------|--|--------------|--|--------------|--|--------------|--|--------------|--|--------------|--|--------------|--|--------------|--|--------------|--|--------------|--|--------------|--|--------------|--|--------------|--|--------------|--|--------------|--|--------------|--|--------------|--|--------------|--|--------------|--|--------------|--|--------------|--|--------------|--|--------------|--|--------------|--|--------------|--|--------------|--|--------------|--|--------------|--|--------------|--|--------------|--|--------------|--|--------------|--|--------------|--|--------------|--|--------------|--|--------------|--|--------------|--|--------------|--|--------------|--|--------------|--|--------------|--|--------------|--|--------------|--|--------------|--|--------------|--|--------------|--|--------------|--|--------------|--|--------------|--|--------------|--|--------------|--|--------------|--|--------------|--|--------------|--|--------------|--|--------------|--|--------------|--|--------------|--|--------------|--|--------------|--|--------------|--|--------------|--|--------------|--|--------------|--|--------------|--|--------------|--|--------------|--|--------------|--|--------------|--|--------------|--|----------------|--|
|--|--|-------|--|---------|--|---------|--|-------------|--|-------------|--|-------------|--|-------------|--|-------------|--|-------------|--|-------------|--|-------------|--|-------------|--|-------------|--|-------------|--|-------------|--|-------------|--|-------------|--|-------------|--|-------------|--|-------------|--|-------------|--|-------------|--|-------------|--|-------------|--|-------------|--|-------------|--|-------------|--|-------------|--|-------------|--|-------------|--|-------------|--|-------------|--|-------------|--|-------------|--|-------------|--|-------------|--|-------------|--|-------------|--|-------------|--|-------------|--|-------------|--|-------------|--|-------------|--|-------------|--|-------------|--|-------------|--|-------------|--|-------------|--|-------------|--|-------------|--|-------------|--|-------------|--|-------------|--|-------------|--|-------------|--|-------------|--|-------------|--|-------------|--|-------------|--|-------------|--|-------------|--|-------------|--|-------------|--|-------------|--|-------------|--|-------------|--|-------------|--|-------------|--|-------------|--|-------------|--|-------------|--|-------------|--|-------------|--|-------------|--|-------------|--|-------------|--|-------------|--|-------------|--|-------------|--|-------------|--|-------------|--|-------------|--|-------------|--|-------------|--|-------------|--|-------------|--|-------------|--|-------------|--|-------------|--|-------------|--|-------------|--|-------------|--|-------------|--|-------------|--|-------------|--|-------------|--|-------------|--|-------------|--|-------------|--|-------------|--|-------------|--|-------------|--|--------------|--|--------------|--|--------------|--|--------------|--|--------------|--|--------------|--|--------------|--|--------------|--|--------------|--|--------------|--|--------------|--|--------------|--|--------------|--|--------------|--|--------------|--|--------------|--|--------------|--|--------------|--|--------------|--|--------------|--|--------------|--|--------------|--|--------------|--|--------------|--|--------------|--|--------------|--|--------------|--|--------------|--|--------------|--|--------------|--|--------------|--|--------------|--|--------------|--|--------------|--|--------------|--|--------------|--|--------------|--|--------------|--|--------------|--|--------------|--|--------------|--|--------------|--|--------------|--|--------------|--|--------------|--|--------------|--|--------------|--|--------------|--|--------------|--|--------------|--|--------------|--|--------------|--|--------------|--|--------------|--|--------------|--|--------------|--|--------------|--|--------------|--|--------------|--|--------------|--|--------------|--|--------------|--|--------------|--|--------------|--|--------------|--|--------------|--|--------------|--|--------------|--|--------------|--|--------------|--|--------------|--|--------------|--|--------------|--|--------------|--|--------------|--|--------------|--|--------------|--|--------------|--|--------------|--|--------------|--|--------------|--|--------------|--|--------------|--|--------------|--|--------------|--|--------------|--|--------------|--|--------------|--|--------------|--|--------------|--|--------------|--|--------------|--|--------------|--|--------------|--|--------------|--|--------------|--|--------------|--|--------------|--|--------------|--|--------------|--|--------------|--|--------------|--|--------------|--|--------------|--|--------------|--|--------------|--|--------------|--|--------------|--|--------------|--|--------------|--|--------------|--|--------------|--|--------------|--|--------------|--|--------------|--|--------------|--|--------------|--|--------------|--|--------------|--|--------------|--|--------------|--|--------------|--|--------------|--|--------------|--|--------------|--|--------------|--|--------------|--|--------------|--|--------------|--|--------------|--|--------------|--|--------------|--|--------------|--|--------------|--|--------------|--|--------------|--|--------------|--|--------------|--|--------------|--|--------------|--|--------------|--|--------------|--|--------------|--|--------------|--|--------------|--|--------------|--|--------------|--|--------------|--|--------------|--|--------------|--|--------------|--|--------------|--|--------------|--|--------------|--|--------------|--|--------------|--|--------------|--|--------------|--|--------------|--|--------------|--|--------------|--|--------------|--|--------------|--|--------------|--|--------------|--|--------------|--|--------------|--|--------------|--|--------------|--|--------------|--|--------------|--|--------------|--|--------------|--|--------------|--|--------------|--|--------------|--|--------------|--|--------------|--|--------------|--|--------------|--|--------------|--|--------------|--|--------------|--|--------------|--|--------------|--|--------------|--|--------------|--|--------------|--|--------------|--|--------------|--|--------------|--|--------------|--|--------------|--|--------------|--|--------------|--|--------------|--|--------------|--|--------------|--|--------------|--|--------------|--|--------------|--|--------------|--|--------------|--|--------------|--|--------------|--|--------------|--|--------------|--|--------------|--|--------------|--|--------------|--|--------------|--|--------------|--|--------------|--|--------------|--|--------------|--|--------------|--|--------------|--|--------------|--|--------------|--|--------------|--|--------------|--|--------------|--|--------------|--|--------------|--|--------------|--|--------------|--|--------------|--|--------------|--|--------------|--|--------------|--|--------------|--|--------------|--|--------------|--|--------------|--|--------------|--|--------------|--|--------------|--|--------------|--|--------------|--|--------------|--|--------------|--|--------------|--|--------------|--|--------------|--|--------------|--|--------------|--|--------------|--|--------------|--|--------------|--|--------------|--|--------------|--|--------------|--|--------------|--|--------------|--|--------------|--|--------------|--|--------------|--|--------------|--|--------------|--|--------------|--|--------------|--|--------------|--|--------------|--|--------------|--|--------------|--|--------------|--|--------------|--|--------------|--|--------------|--|--------------|--|--------------|--|--------------|--|--------------|--|--------------|--|--------------|--|--------------|--|--------------|--|--------------|--|--------------|--|--------------|--|--------------|--|--------------|--|--------------|--|--------------|--|--------------|--|--------------|--|--------------|--|--------------|--|--------------|--|--------------|--|--------------|--|--------------|--|--------------|--|--------------|--|--------------|--|--------------|--|--------------|--|--------------|--|--------------|--|--------------|--|--------------|--|--------------|--|--------------|--|--------------|--|--------------|--|--------------|--|--------------|--|--------------|--|--------------|--|--------------|--|--------------|--|--------------|--|--------------|--|--------------|--|--------------|--|--------------|--|--------------|--|--------------|--|--------------|--|--------------|--|--------------|--|--------------|--|--------------|--|--------------|--|--------------|--|--------------|--|--------------|--|--------------|--|--------------|--|--------------|--|--------------|--|--------------|--|--------------|--|--------------|--|--------------|--|--------------|--|--------------|--|--------------|--|--------------|--|--------------|--|--------------|--|--------------|--|--------------|--|--------------|--|--------------|--|--------------|--|--------------|--|--------------|--|--------------|--|--------------|--|--------------|--|--------------|--|--------------|--|--------------|--|--------------|--|--------------|--|--------------|--|--------------|--|--------------|--|--------------|--|--------------|--|--------------|--|--------------|--|--------------|--|--------------|--|--------------|--|--------------|--|--------------|--|--------------|--|--------------|--|--------------|--|--------------|--|--------------|--|--------------|--|--------------|--|--------------|--|--------------|--|--------------|--|--------------|--|--------------|--|--------------|--|--------------|--|--------------|--|--------------|--|--------------|--|--------------|--|--------------|--|--------------|--|--------------|--|--------------|--|--------------|--|--------------|--|--------------|--|--------------|--|--------------|--|--------------|--|--------------|--|--------------|--|--------------|--|--------------|--|--------------|--|--------------|--|--------------|--|--------------|--|--------------|--|--------------|--|--------------|--|--------------|--|--------------|--|--------------|--|--------------|--|--------------|--|--------------|--|--------------|--|--------------|--|--------------|--|--------------|--|--------------|--|--------------|--|--------------|--|--------------|--|--------------|--|--------------|--|--------------|--|--------------|--|--------------|--|--------------|--|--------------|--|--------------|--|--------------|--|--------------|--|--------------|--|--------------|--|--------------|--|--------------|--|--------------|--|--------------|--|--------------|--|--------------|--|--------------|--|--------------|--|--------------|--|--------------|--|--------------|--|--------------|--|--------------|--|--------------|--|--------------|--|--------------|--|--------------|--|--------------|--|--------------|--|--------------|--|--------------|--|--------------|--|--------------|--|--------------|--|--------------|--|--------------|--|--------------|--|--------------|--|--------------|--|--------------|--|--------------|--|--------------|--|--------------|--|--------------|--|--------------|--|--------------|--|--------------|--|--------------|--|--------------|--|--------------|--|--------------|--|--------------|--|--------------|--|--------------|--|--------------|--|--------------|--|--------------|--|--------------|--|--------------|--|--------------|--|--------------|--|--------------|--|--------------|--|--------------|--|--------------|--|--------------|--|--------------|--|--------------|--|--------------|--|--------------|--|--------------|--|--------------|--|--------------|--|--------------|--|--------------|--|--------------|--|--------------|--|--------------|--|--------------|--|--------------|--|--------------|--|--------------|--|--------------|--|--------------|--|--------------|--|--------------|--|--------------|--|--------------|--|--------------|--|--------------|--|--------------|--|--------------|--|--------------|--|--------------|--|--------------|--|--------------|--|--------------|--|--------------|--|--------------|--|--------------|--|--------------|--|--------------|--|--------------|--|--------------|--|--------------|--|--------------|--|--------------|--|--------------|--|--------------|--|--------------|--|--------------|--|--------------|--|--------------|--|--------------|--|--------------|--|--------------|--|--------------|--|--------------|--|--------------|--|--------------|--|--------------|--|--------------|--|--------------|--|--------------|--|--------------|--|--------------|--|--------------|--|--------------|--|--------------|--|--------------|--|--------------|--|--------------|--|--------------|--|--------------|--|--------------|--|--------------|--|--------------|--|--------------|--|--------------|--|--------------|--|--------------|--|--------------|--|--------------|--|--------------|--|--------------|--|--------------|--|--------------|--|--------------|--|--------------|--|--------------|--|--------------|--|--------------|--|--------------|--|--------------|--|--------------|--|--------------|--|--------------|--|--------------|--|--------------|--|--------------|--|--------------|--|--------------|--|--------------|--|--------------|--|--------------|--|--------------|--|--------------|--|--------------|--|--------------|--|--------------|--|--------------|--|--------------|--|--------------|--|--------------|--|--------------|--|--------------|--|--------------|--|--------------|--|--------------|--|--------------|--|--------------|--|--------------|--|--------------|--|--------------|--|--------------|--|--------------|--|--------------|--|--------------|--|--------------|--|--------------|--|--------------|--|--------------|--|--------------|--|--------------|--|--------------|--|--------------|--|--------------|--|--------------|--|--------------|--|--------------|--|--------------|--|--------------|--|--------------|--|--------------|--|--------------|--|--------------|--|--------------|--|--------------|--|--------------|--|----------------|--|







Supplementary Table S1. Overview on the abundance of all relatively quantified 5180 proteins

[illegible]



Supplementary Table S1. Overview on the abundance of all relatively quantified 5180 proteins

[illegible]





Supplementary Table S1. Overview on the abundance of all relatively quantified 5180 proteins

|  |  | MCF-7   |            |            |            |             |             |             |             |             |             | MDA-MB-231  |             |             |             |             |             |             |             |             |             |             |             |             |             |             |             |             |             |             |             |             |             |             |             |             |             |             |             |             |             |             |             |             |             |             |             |             |             |             |             |             |             |             |             |             |             |             |             |             |             |             |             |             |             |             |             |             |             |             |             |             |             |             |             |             |             |             |             |             |             |             |             |             |             |             |             |             |             |             |             |             |             |             |             |             |             |             |             |             |             |             |             |             |             |             |             |             |             |             |              |              |              |              |              |              |              |              |              |              |              |              |              |              |              |              |              |              |              |              |              |              |              |              |              |              |              |              |              |              |              |              |              |              |              |              |              |              |              |              |              |              |              |              |              |              |              |              |              |              |              |              |              |              |              |              |              |              |              |              |              |              |              |              |              |              |              |              |              |              |              |              |              |              |              |              |              |              |              |              |              |              |              |              |              |              |              |              |              |              |              |              |              |              |              |              |              |              |              |              |              |              |              |              |              |              |              |              |              |              |              |              |              |              |              |              |              |              |              |              |              |              |              |              |              |              |              |              |              |              |              |              |              |              |              |              |              |              |              |              |              |              |              |              |              |              |              |              |              |              |              |              |              |              |              |              |              |              |              |              |              |              |              |              |              |              |              |              |              |              |              |              |              |              |              |              |              |              |              |              |              |              |              |              |              |              |              |              |              |              |              |              |              |              |              |              |              |              |              |              |              |              |              |              |              |              |              |              |              |              |              |              |              |              |              |              |              |              |              |              |              |              |              |              |              |              |              |              |              |              |              |              |              |              |              |              |              |              |              |              |              |              |              |              |              |              |              |              |              |              |              |              |              |              |              |              |              |              |              |              |              |              |              |              |              |              |              |              |              |              |              |              |              |              |              |              |              |              |              |              |              |              |              |              |              |              |              |              |              |              |              |              |              |              |              |              |              |              |              |              |              |              |              |              |              |              |              |              |              |              |              |              |              |              |              |              |              |              |              |              |              |              |              |              |              |              |              |              |              |              |              |              |              |              |              |              |              |              |              |              |              |              |              |              |              |              |              |              |              |              |              |              |              |              |              |              |              |              |              |              |              |              |              |              |              |              |              |              |              |              |              |              |              |              |              |              |              |              |              |              |              |              |              |              |              |              |              |              |              |              |              |              |              |              |              |              |              |              |              |              |              |              |              |              |              |              |              |              |              |              |              |              |              |              |              |              |              |              |              |              |              |              |              |              |              |              |              |              |              |              |              |              |              |              |              |              |              |              |              |              |              |              |              |              |              |              |              |              |              |              |              |              |              |              |              |              |              |              |              |              |              |              |              |              |              |              |              |              |              |              |              |              |              |              |              |              |              |              |              |              |              |              |              |              |              |              |              |              |              |              |              |              |              |              |              |              |              |              |              |              |              |              |              |              |              |              |              |              |              |              |              |              |              |              |              |              |              |              |              |              |              |              |              |              |              |              |              |              |              |              |              |              |              |              |              |              |              |              |              |              |              |              |              |              |              |              |              |              |              |              |              |              |              |              |              |              |              |              |              |              |              |              |              |              |              |              |              |              |              |              |              |              |              |              |              |              |              |              |              |              |              |              |              |              |              |              |              |              |              |              |              |              |              |              |              |              |              |              |              |              |              |              |              |              |              |              |              |              |              |              |              |              |              |              |              |              |              |              |              |              |              |              |              |              |              |              |              |              |              |              |              |              |              |              |              |              |              |              |              |              |              |              |              |              |              |              |              |              |              |              |              |              |              |              |              |              |              |              |              |              |              |              |              |              |              |              |              |              |              |              |              |              |              |              |              |              |              |              |              |              |              |              |              |              |              |              |              |              |              |              |              |              |              |              |              |              |              |              |              |              |              |              |              |              |              |              |              |              |              |              |              |              |              |              |              |              |              |              |              |              |              |              |              |              |              |              |              |              |              |              |              |              |              |              |              |              |              |              |              |              |              |              |              |              |              |              |              |              |              |              |              |              |              |              |              |              |              |              |              |              |              |              |              |              |              |              |              |              |              |              |              |              |              |              |              |              |              |              |              |              |              |              |              |              |              |              |              |              |              |              |              |              |              |              |              |              |              |              |              |              |              |              |              |              |              |              |              |              |              |              |              |              |              |              |              |              |              |              |              |              |              |              |              |              |              |              |              |              |              |              |              |              |              |              |              |              |              |              |              |              |              |              |              |              |              |              |              |              |              |
|--|--|---------|------------|------------|------------|-------------|-------------|-------------|-------------|-------------|-------------|-------------|-------------|-------------|-------------|-------------|-------------|-------------|-------------|-------------|-------------|-------------|-------------|-------------|-------------|-------------|-------------|-------------|-------------|-------------|-------------|-------------|-------------|-------------|-------------|-------------|-------------|-------------|-------------|-------------|-------------|-------------|-------------|-------------|-------------|-------------|-------------|-------------|-------------|-------------|-------------|-------------|-------------|-------------|-------------|-------------|-------------|-------------|-------------|-------------|-------------|-------------|-------------|-------------|-------------|-------------|-------------|-------------|-------------|-------------|-------------|-------------|-------------|-------------|-------------|-------------|-------------|-------------|-------------|-------------|-------------|-------------|-------------|-------------|-------------|-------------|-------------|-------------|-------------|-------------|-------------|-------------|-------------|-------------|-------------|-------------|-------------|-------------|-------------|-------------|-------------|-------------|-------------|-------------|-------------|-------------|-------------|-------------|-------------|-------------|--------------|--------------|--------------|--------------|--------------|--------------|--------------|--------------|--------------|--------------|--------------|--------------|--------------|--------------|--------------|--------------|--------------|--------------|--------------|--------------|--------------|--------------|--------------|--------------|--------------|--------------|--------------|--------------|--------------|--------------|--------------|--------------|--------------|--------------|--------------|--------------|--------------|--------------|--------------|--------------|--------------|--------------|--------------|--------------|--------------|--------------|--------------|--------------|--------------|--------------|--------------|--------------|--------------|--------------|--------------|--------------|--------------|--------------|--------------|--------------|--------------|--------------|--------------|--------------|--------------|--------------|--------------|--------------|--------------|--------------|--------------|--------------|--------------|--------------|--------------|--------------|--------------|--------------|--------------|--------------|--------------|--------------|--------------|--------------|--------------|--------------|--------------|--------------|--------------|--------------|--------------|--------------|--------------|--------------|--------------|--------------|--------------|--------------|--------------|--------------|--------------|--------------|--------------|--------------|--------------|--------------|--------------|--------------|--------------|--------------|--------------|--------------|--------------|--------------|--------------|--------------|--------------|--------------|--------------|--------------|--------------|--------------|--------------|--------------|--------------|--------------|--------------|--------------|--------------|--------------|--------------|--------------|--------------|--------------|--------------|--------------|--------------|--------------|--------------|--------------|--------------|--------------|--------------|--------------|--------------|--------------|--------------|--------------|--------------|--------------|--------------|--------------|--------------|--------------|--------------|--------------|--------------|--------------|--------------|--------------|--------------|--------------|--------------|--------------|--------------|--------------|--------------|--------------|--------------|--------------|--------------|--------------|--------------|--------------|--------------|--------------|--------------|--------------|--------------|--------------|--------------|--------------|--------------|--------------|--------------|--------------|--------------|--------------|--------------|--------------|--------------|--------------|--------------|--------------|--------------|--------------|--------------|--------------|--------------|--------------|--------------|--------------|--------------|--------------|--------------|--------------|--------------|--------------|--------------|--------------|--------------|--------------|--------------|--------------|--------------|--------------|--------------|--------------|--------------|--------------|--------------|--------------|--------------|--------------|--------------|--------------|--------------|--------------|--------------|--------------|--------------|--------------|--------------|--------------|--------------|--------------|--------------|--------------|--------------|--------------|--------------|--------------|--------------|--------------|--------------|--------------|--------------|--------------|--------------|--------------|--------------|--------------|--------------|--------------|--------------|--------------|--------------|--------------|--------------|--------------|--------------|--------------|--------------|--------------|--------------|--------------|--------------|--------------|--------------|--------------|--------------|--------------|--------------|--------------|--------------|--------------|--------------|--------------|--------------|--------------|--------------|--------------|--------------|--------------|--------------|--------------|--------------|--------------|--------------|--------------|--------------|--------------|--------------|--------------|--------------|--------------|--------------|--------------|--------------|--------------|--------------|--------------|--------------|--------------|--------------|--------------|--------------|--------------|--------------|--------------|--------------|--------------|--------------|--------------|--------------|--------------|--------------|--------------|--------------|--------------|--------------|--------------|--------------|--------------|--------------|--------------|--------------|--------------|--------------|--------------|--------------|--------------|--------------|--------------|--------------|--------------|--------------|--------------|--------------|--------------|--------------|--------------|--------------|--------------|--------------|--------------|--------------|--------------|--------------|--------------|--------------|--------------|--------------|--------------|--------------|--------------|--------------|--------------|--------------|--------------|--------------|--------------|--------------|--------------|--------------|--------------|--------------|--------------|--------------|--------------|--------------|--------------|--------------|--------------|--------------|--------------|--------------|--------------|--------------|--------------|--------------|--------------|--------------|--------------|--------------|--------------|--------------|--------------|--------------|--------------|--------------|--------------|--------------|--------------|--------------|--------------|--------------|--------------|--------------|--------------|--------------|--------------|--------------|--------------|--------------|--------------|--------------|--------------|--------------|--------------|--------------|--------------|--------------|--------------|--------------|--------------|--------------|--------------|--------------|--------------|--------------|--------------|--------------|--------------|--------------|--------------|--------------|--------------|--------------|--------------|--------------|--------------|--------------|--------------|--------------|--------------|--------------|--------------|--------------|--------------|--------------|--------------|--------------|--------------|--------------|--------------|--------------|--------------|--------------|--------------|--------------|--------------|--------------|--------------|--------------|--------------|--------------|--------------|--------------|--------------|--------------|--------------|--------------|--------------|--------------|--------------|--------------|--------------|--------------|--------------|--------------|--------------|--------------|--------------|--------------|--------------|--------------|--------------|--------------|--------------|--------------|--------------|--------------|--------------|--------------|--------------|--------------|--------------|--------------|--------------|--------------|--------------|--------------|--------------|--------------|--------------|--------------|--------------|--------------|--------------|--------------|--------------|--------------|--------------|--------------|--------------|--------------|--------------|--------------|--------------|--------------|--------------|--------------|--------------|--------------|--------------|--------------|--------------|--------------|--------------|--------------|--------------|--------------|--------------|--------------|--------------|--------------|--------------|--------------|--------------|--------------|--------------|--------------|--------------|--------------|--------------|--------------|--------------|--------------|--------------|--------------|--------------|--------------|--------------|--------------|--------------|--------------|--------------|--------------|--------------|--------------|--------------|--------------|--------------|--------------|--------------|--------------|--------------|--------------|--------------|--------------|--------------|--------------|--------------|--------------|--------------|--------------|--------------|--------------|--------------|--------------|--------------|--------------|--------------|--------------|--------------|--------------|--------------|--------------|--------------|--------------|--------------|--------------|--------------|--------------|--------------|--------------|--------------|--------------|--------------|--------------|--------------|--------------|--------------|--------------|--------------|--------------|--------------|--------------|--------------|--------------|--------------|--------------|--------------|--------------|--------------|--------------|--------------|--------------|--------------|--------------|--------------|--------------|--------------|--------------|--------------|--------------|--------------|--------------|--------------|--------------|--------------|--------------|--------------|--------------|--------------|--------------|--------------|--------------|--------------|--------------|--------------|--------------|--------------|--------------|--------------|--------------|--------------|--------------|--------------|--------------|--------------|--------------|--------------|--------------|--------------|--------------|--------------|--------------|--------------|--------------|--------------|--------------|--------------|--------------|--------------|--------------|--------------|--------------|--------------|--------------|--------------|--------------|--------------|--------------|--------------|--------------|--------------|--------------|--------------|--------------|--------------|--------------|--------------|--------------|--------------|--------------|--------------|--------------|--------------|--------------|--------------|--------------|--------------|--------------|--------------|--------------|--------------|--------------|--------------|--------------|--------------|--------------|--------------|--------------|--------------|--------------|--------------|--------------|--------------|--------------|--------------|--------------|--------------|--------------|--------------|--------------|--------------|--------------|--------------|--------------|--------------|--------------|--------------|--------------|--------------|--------------|--------------|--------------|--------------|--------------|--------------|--------------|--------------|--------------|--------------|--------------|--------------|--------------|--------------|--------------|--------------|--------------|--------------|--------------|--------------|--------------|--------------|--------------|--------------|--------------|--------------|--------------|--------------|--------------|--------------|--------------|--------------|--------------|--------------|--------------|--------------|--------------|--------------|--------------|--------------|--------------|--------------|--------------|--------------|--------------|--------------|--------------|--------------|--------------|--------------|--------------|--------------|--------------|--------------|--------------|--------------|--------------|--------------|--------------|--------------|--------------|--------------|--------------|--------------|--------------|--------------|--------------|--------------|--------------|--------------|--------------|--------------|--------------|--------------|--------------|--------------|--------------|--------------|--------------|--------------|--------------|--------------|--------------|--------------|--------------|--------------|--------------|--------------|--------------|--------------|--------------|--------------|--------------|--------------|--------------|--------------|--------------|--------------|--------------|--------------|--------------|--------------|--------------|--------------|--------------|--------------|--------------|--------------|--------------|--------------|--------------|--------------|--------------|--------------|--------------|--------------|--------------|--------------|--------------|--------------|--------------|--------------|--------------|--------------|--------------|--------------|--------------|--------------|--------------|--------------|--------------|--------------|--------------|
|  |  | Uniprot | Control 01 | Control 02 | Control 03 | Dai IC20 01 | Dai IC20 02 | Dai IC20 03 | Dai IC20 04 | Dai IC20 05 | Dai IC20 06 | Gen IC20 01 | Gen IC20 02 | Gen IC20 03 | Gen IC20 04 | Gen IC20 05 | Gen IC20 06 | Gen IC20 07 | Gen IC20 08 | Gen IC20 09 | Gen IC20 10 | Gen IC20 11 | Gen IC20 12 | Gen IC20 13 | Gen IC20 14 | Gen IC20 15 | Gen IC20 16 | Gen IC20 17 | Gen IC20 18 | Gen IC20 19 | Gen IC20 20 | Gen IC20 21 | Gen IC20 22 | Gen IC20 23 | Gen IC20 24 | Gen IC20 25 | Gen IC20 26 | Gen IC20 27 | Gen IC20 28 | Gen IC20 29 | Gen IC20 30 | Gen IC20 31 | Gen IC20 32 | Gen IC20 33 | Gen IC20 34 | Gen IC20 35 | Gen IC20 36 | Gen IC20 37 | Gen IC20 38 | Gen IC20 39 | Gen IC20 40 | Gen IC20 41 | Gen IC20 42 | Gen IC20 43 | Gen IC20 44 | Gen IC20 45 | Gen IC20 46 | Gen IC20 47 | Gen IC20 48 | Gen IC20 49 | Gen IC20 50 | Gen IC20 51 | Gen IC20 52 | Gen IC20 53 | Gen IC20 54 | Gen IC20 55 | Gen IC20 56 | Gen IC20 57 | Gen IC20 58 | Gen IC20 59 | Gen IC20 60 | Gen IC20 61 | Gen IC20 62 | Gen IC20 63 | Gen IC20 64 | Gen IC20 65 | Gen IC20 66 | Gen IC20 67 | Gen IC20 68 | Gen IC20 69 | Gen IC20 70 | Gen IC20 71 | Gen IC20 72 | Gen IC20 73 | Gen IC20 74 | Gen IC20 75 | Gen IC20 76 | Gen IC20 77 | Gen IC20 78 | Gen IC20 79 | Gen IC20 80 | Gen IC20 81 | Gen IC20 82 | Gen IC20 83 | Gen IC20 84 | Gen IC20 85 | Gen IC20 86 | Gen IC20 87 | Gen IC20 88 | Gen IC20 89 | Gen IC20 90 | Gen IC20 91 | Gen IC20 92 | Gen IC20 93 | Gen IC20 94 | Gen IC20 95 | Gen IC20 96 | Gen IC20 97 | Gen IC20 98 | Gen IC20 99 | Gen IC20 100 | Gen IC20 101 | Gen IC20 102 | Gen IC20 103 | Gen IC20 104 | Gen IC20 105 | Gen IC20 106 | Gen IC20 107 | Gen IC20 108 | Gen IC20 109 | Gen IC20 110 | Gen IC20 111 | Gen IC20 112 | Gen IC20 113 | Gen IC20 114 | Gen IC20 115 | Gen IC20 116 | Gen IC20 117 | Gen IC20 118 | Gen IC20 119 | Gen IC20 120 | Gen IC20 121 | Gen IC20 122 | Gen IC20 123 | Gen IC20 124 | Gen IC20 125 | Gen IC20 126 | Gen IC20 127 | Gen IC20 128 | Gen IC20 129 | Gen IC20 130 | Gen IC20 131 | Gen IC20 132 | Gen IC20 133 | Gen IC20 134 | Gen IC20 135 | Gen IC20 136 | Gen IC20 137 | Gen IC20 138 | Gen IC20 139 | Gen IC20 140 | Gen IC20 141 | Gen IC20 142 | Gen IC20 143 | Gen IC20 144 | Gen IC20 145 | Gen IC20 146 | Gen IC20 147 | Gen IC20 148 | Gen IC20 149 | Gen IC20 150 | Gen IC20 151 | Gen IC20 152 | Gen IC20 153 | Gen IC20 154 | Gen IC20 155 | Gen IC20 156 | Gen IC20 157 | Gen IC20 158 | Gen IC20 159 | Gen IC20 160 | Gen IC20 161 | Gen IC20 162 | Gen IC20 163 | Gen IC20 164 | Gen IC20 165 | Gen IC20 166 | Gen IC20 167 | Gen IC20 168 | Gen IC20 169 | Gen IC20 170 | Gen IC20 171 | Gen IC20 172 | Gen IC20 173 | Gen IC20 174 | Gen IC20 175 | Gen IC20 176 | Gen IC20 177 | Gen IC20 178 | Gen IC20 179 | Gen IC20 180 | Gen IC20 181 | Gen IC20 182 | Gen IC20 183 | Gen IC20 184 | Gen IC20 185 | Gen IC20 186 | Gen IC20 187 | Gen IC20 188 | Gen IC20 189 | Gen IC20 190 | Gen IC20 191 | Gen IC20 192 | Gen IC20 193 | Gen IC20 194 | Gen IC20 195 | Gen IC20 196 | Gen IC20 197 | Gen IC20 198 | Gen IC20 199 | Gen IC20 200 | Gen IC20 201 | Gen IC20 202 | Gen IC20 203 | Gen IC20 204 | Gen IC20 205 | Gen IC20 206 | Gen IC20 207 | Gen IC20 208 | Gen IC20 209 | Gen IC20 210 | Gen IC20 211 | Gen IC20 212 | Gen IC20 213 | Gen IC20 214 | Gen IC20 215 | Gen IC20 216 | Gen IC20 217 | Gen IC20 218 | Gen IC20 219 | Gen IC20 220 | Gen IC20 221 | Gen IC20 222 | Gen IC20 223 | Gen IC20 224 | Gen IC20 225 | Gen IC20 226 | Gen IC20 227 | Gen IC20 228 | Gen IC20 229 | Gen IC20 230 | Gen IC20 231 | Gen IC20 232 | Gen IC20 233 | Gen IC20 234 | Gen IC20 235 | Gen IC20 236 | Gen IC20 237 | Gen IC20 238 | Gen IC20 239 | Gen IC20 240 | Gen IC20 241 | Gen IC20 242 | Gen IC20 243 | Gen IC20 244 | Gen IC20 245 | Gen IC20 246 | Gen IC20 247 | Gen IC20 248 | Gen IC20 249 | Gen IC20 250 | Gen IC20 251 | Gen IC20 252 | Gen IC20 253 | Gen IC20 254 | Gen IC20 255 | Gen IC20 256 | Gen IC20 257 | Gen IC20 258 | Gen IC20 259 | Gen IC20 260 | Gen IC20 261 | Gen IC20 262 | Gen IC20 263 | Gen IC20 264 | Gen IC20 265 | Gen IC20 266 | Gen IC20 267 | Gen IC20 268 | Gen IC20 269 | Gen IC20 270 | Gen IC20 271 | Gen IC20 272 | Gen IC20 273 | Gen IC20 274 | Gen IC20 275 | Gen IC20 276 | Gen IC20 277 | Gen IC20 278 | Gen IC20 279 | Gen IC20 280 | Gen IC20 281 | Gen IC20 282 | Gen IC20 283 | Gen IC20 284 | Gen IC20 285 | Gen IC20 286 | Gen IC20 287 | Gen IC20 288 | Gen IC20 289 | Gen IC20 290 | Gen IC20 291 | Gen IC20 292 | Gen IC20 293 | Gen IC20 294 | Gen IC20 295 | Gen IC20 296 | Gen IC20 297 | Gen IC20 298 | Gen IC20 299 | Gen IC20 300 | Gen IC20 301 | Gen IC20 302 | Gen IC20 303 | Gen IC20 304 | Gen IC20 305 | Gen IC20 306 | Gen IC20 307 | Gen IC20 308 | Gen IC20 309 | Gen IC20 310 | Gen IC20 311 | Gen IC20 312 | Gen IC20 313 | Gen IC20 314 | Gen IC20 315 | Gen IC20 316 | Gen IC20 317 | Gen IC20 318 | Gen IC20 319 | Gen IC20 320 | Gen IC20 321 | Gen IC20 322 | Gen IC20 323 | Gen IC20 324 | Gen IC20 325 | Gen IC20 326 | Gen IC20 327 | Gen IC20 328 | Gen IC20 329 | Gen IC20 330 | Gen IC20 331 | Gen IC20 332 | Gen IC20 333 | Gen IC20 334 | Gen IC20 335 | Gen IC20 336 | Gen IC20 337 | Gen IC20 338 | Gen IC20 339 | Gen IC20 340 | Gen IC20 341 | Gen IC20 342 | Gen IC20 343 | Gen IC20 344 | Gen IC20 345 | Gen IC20 346 | Gen IC20 347 | Gen IC20 348 | Gen IC20 349 | Gen IC20 350 | Gen IC20 351 | Gen IC20 352 | Gen IC20 353 | Gen IC20 354 | Gen IC20 355 | Gen IC20 356 | Gen IC20 357 | Gen IC20 358 | Gen IC20 359 | Gen IC20 360 | Gen IC20 361 | Gen IC20 362 | Gen IC20 363 | Gen IC20 364 | Gen IC20 365 | Gen IC20 366 | Gen IC20 367 | Gen IC20 368 | Gen IC20 369 | Gen IC20 370 | Gen IC20 371 | Gen IC20 372 | Gen IC20 373 | Gen IC20 374 | Gen IC20 375 | Gen IC20 376 | Gen IC20 377 | Gen IC20 378 | Gen IC20 379 | Gen IC20 380 | Gen IC20 381 | Gen IC20 382 | Gen IC20 383 | Gen IC20 384 | Gen IC20 385 | Gen IC20 386 | Gen IC20 387 | Gen IC20 388 | Gen IC20 389 | Gen IC20 390 | Gen IC20 391 | Gen IC20 392 | Gen IC20 393 | Gen IC20 394 | Gen IC20 395 | Gen IC20 396 | Gen IC20 397 | Gen IC20 398 | Gen IC20 399 | Gen IC20 400 | Gen IC20 401 | Gen IC20 402 | Gen IC20 403 | Gen IC20 404 | Gen IC20 405 | Gen IC20 406 | Gen IC20 407 | Gen IC20 408 | Gen IC20 409 | Gen IC20 410 | Gen IC20 411 | Gen IC20 412 | Gen IC20 413 | Gen IC20 414 | Gen IC20 415 | Gen IC20 416 | Gen IC20 417 | Gen IC20 418 | Gen IC20 419 | Gen IC20 420 | Gen IC20 421 | Gen IC20 422 | Gen IC20 423 | Gen IC20 424 | Gen IC20 425 | Gen IC20 426 | Gen IC20 427 | Gen IC20 428 | Gen IC20 429 | Gen IC20 430 | Gen IC20 431 | Gen IC20 432 | Gen IC20 433 | Gen IC20 434 | Gen IC20 435 | Gen IC20 436 | Gen IC20 437 | Gen IC20 438 | Gen IC20 439 | Gen IC20 440 | Gen IC20 441 | Gen IC20 442 | Gen IC20 443 | Gen IC20 444 | Gen IC20 445 | Gen IC20 446 | Gen IC20 447 | Gen IC20 448 | Gen IC20 449 | Gen IC20 450 | Gen IC20 451 | Gen IC20 452 | Gen IC20 453 | Gen IC20 454 | Gen IC20 455 | Gen IC20 456 | Gen IC20 457 | Gen IC20 458 | Gen IC20 459 | Gen IC20 460 | Gen IC20 461 | Gen IC20 462 | Gen IC20 463 | Gen IC20 464 | Gen IC20 465 | Gen IC20 466 | Gen IC20 467 | Gen IC20 468 | Gen IC20 469 | Gen IC20 470 | Gen IC20 471 | Gen IC20 472 | Gen IC20 473 | Gen IC20 474 | Gen IC20 475 | Gen IC20 476 | Gen IC20 477 | Gen IC20 478 | Gen IC20 479 | Gen IC20 480 | Gen IC20 481 | Gen IC20 482 | Gen IC20 483 | Gen IC20 484 | Gen IC20 485 | Gen IC20 486 | Gen IC20 487 | Gen IC20 488 | Gen IC20 489 | Gen IC20 490 | Gen IC20 491 | Gen IC20 492 | Gen IC20 493 | Gen IC20 494 | Gen IC20 495 | Gen IC20 496 | Gen IC20 497 | Gen IC20 498 | Gen IC20 499 | Gen IC20 500 | Gen IC20 501 | Gen IC20 502 | Gen IC20 503 | Gen IC20 504 | Gen IC20 505 | Gen IC20 506 | Gen IC20 507 | Gen IC20 508 | Gen IC20 509 | Gen IC20 510 | Gen IC20 511 | Gen IC20 512 | Gen IC20 513 | Gen IC20 514 | Gen IC20 515 | Gen IC20 516 | Gen IC20 517 | Gen IC20 518 | Gen IC20 519 | Gen IC20 520 | Gen IC20 521 | Gen IC20 522 | Gen IC20 523 | Gen IC20 524 | Gen IC20 525 | Gen IC20 526 | Gen IC20 527 | Gen IC20 528 | Gen IC20 529 | Gen IC20 530 | Gen IC20 531 | Gen IC20 532 | Gen IC20 533 | Gen IC20 534 | Gen IC20 535 | Gen IC20 536 | Gen IC20 537 | Gen IC20 538 | Gen IC20 539 | Gen IC20 540 | Gen IC20 541 | Gen IC20 542 | Gen IC20 543 | Gen IC20 544 | Gen IC20 545 | Gen IC20 546 | Gen IC20 547 | Gen IC20 548 | Gen IC20 549 | Gen IC20 550 | Gen IC20 551 | Gen IC20 552 | Gen IC20 553 | Gen IC20 554 | Gen IC20 555 | Gen IC20 556 | Gen IC20 557 | Gen IC20 558 | Gen IC20 559 | Gen IC20 560 | Gen IC20 561 | Gen IC20 562 | Gen IC20 563 | Gen IC20 564 | Gen IC20 565 | Gen IC20 566 | Gen IC20 567 | Gen IC20 568 | Gen IC20 569 | Gen IC20 570 | Gen IC20 571 | Gen IC20 572 | Gen IC20 573 | Gen IC20 574 | Gen IC20 575 | Gen IC20 576 | Gen IC20 577 | Gen IC20 578 | Gen IC20 579 | Gen IC20 580 | Gen IC20 581 | Gen IC20 582 | Gen IC20 583 | Gen IC20 584 | Gen IC20 585 | Gen IC20 586 | Gen IC20 587 | Gen IC20 588 | Gen IC20 589 | Gen IC20 590 | Gen IC20 591 | Gen IC20 592 | Gen IC20 593 | Gen IC20 594 | Gen IC20 595 | Gen IC20 596 | Gen IC20 597 | Gen IC20 598 | Gen IC20 599 | Gen IC20 600 | Gen IC20 601 | Gen IC20 602 | Gen IC20 603 | Gen IC20 604 | Gen IC20 605 | Gen IC20 606 | Gen IC20 607 | Gen IC20 608 | Gen IC20 609 | Gen IC20 610 | Gen IC20 611 | Gen IC20 612 | Gen IC20 613 | Gen IC20 614 | Gen IC20 615 | Gen IC20 616 | Gen IC20 617 | Gen IC20 618 | Gen IC20 619 | Gen IC20 620 | Gen IC20 621 | Gen IC20 622 | Gen IC20 623 | Gen IC20 624 | Gen IC20 625 | Gen IC20 626 | Gen IC20 627 | Gen IC20 628 | Gen IC20 629 | Gen IC20 630 | Gen IC20 631 | Gen IC20 632 | Gen IC20 633 | Gen IC20 634 | Gen IC20 635 | Gen IC20 636 | Gen IC20 637 | Gen IC20 638 | Gen IC20 639 | Gen IC20 640 | Gen IC20 641 | Gen IC20 642 | Gen IC20 643 | Gen IC20 644 | Gen IC20 645 | Gen IC20 646 | Gen IC20 647 | Gen IC20 648 | Gen IC20 649 | Gen IC20 650 | Gen IC20 651 | Gen IC20 652 | Gen IC20 653 | Gen IC20 654 | Gen IC20 655 | Gen IC20 656 | Gen IC20 657 | Gen IC20 658 | Gen IC20 659 | Gen IC20 660 | Gen IC20 661 | Gen IC20 662 | Gen IC20 663 | Gen IC20 664 | Gen IC20 665 | Gen IC20 666 | Gen IC20 667 | Gen IC20 668 | Gen IC20 669 | Gen IC20 670 | Gen IC20 671 | Gen IC20 672 | Gen IC20 673 | Gen IC20 674 | Gen IC20 675 | Gen IC20 676 | Gen IC20 677 | Gen IC20 678 | Gen IC20 679 | Gen IC20 680 | Gen IC20 681 | Gen IC20 682 | Gen IC20 683 | Gen IC20 684 | Gen IC20 685 | Gen IC20 686 | Gen IC20 687 | Gen IC20 688 | Gen IC20 689 | Gen IC20 690 | Gen IC20 691 | Gen IC20 692 | Gen IC20 693 | Gen IC20 694 | Gen IC20 695 | Gen IC20 696 | Gen IC20 697 | Gen IC20 698 | Gen IC20 699 | Gen IC20 700 | Gen IC20 701 | Gen IC20 702 | Gen IC20 703 | Gen IC20 704 | Gen IC20 705 | Gen IC20 706 | Gen IC20 707 | Gen IC20 708 | Gen IC20 709 | Gen IC20 710 | Gen IC20 711 | Gen IC20 712 | Gen IC20 713 | Gen IC20 714 | Gen IC20 715 | Gen IC20 716 | Gen IC20 717 | Gen IC20 718 | Gen IC20 719 | Gen IC20 720 | Gen IC20 721 | Gen IC20 722 | Gen IC20 723 | Gen IC20 724 | Gen IC20 725 | Gen IC20 726 | Gen IC20 727 | Gen IC20 728 | Gen IC20 729 | Gen IC20 730 | Gen IC20 731 | Gen IC20 732 | Gen IC20 733 | Gen IC20 734 | Gen IC20 735 | Gen IC20 736 | Gen IC20 737 | Gen IC20 738 | Gen IC20 739 | Gen IC20 740 | Gen IC20 741 | Gen IC20 742 | Gen IC20 743 | Gen IC20 744 | Gen IC20 745 | Gen IC20 746 | Gen IC20 747 | Gen IC20 748 | Gen IC20 749 | Gen IC20 750 | Gen IC20 751 | Gen IC20 752 | Gen IC20 753 | Gen IC20 754 | Gen IC20 755 | Gen IC20 756 | Gen IC20 757 | Gen IC20 758 | Gen IC20 759 | Gen IC20 760 | Gen IC20 761 | Gen IC20 762 | Gen IC20 763 | Gen IC20 764 | Gen IC20 765 | Gen IC20 766 | Gen IC20 767 | Gen IC20 768 | Gen IC20 769 | Gen IC20 770 | Gen IC20 771 | Gen IC20 772 | Gen IC20 773 | Gen IC20 774 | Gen IC20 775 | Gen IC20 776 | Gen IC20 777 | Gen IC20 778 | Gen IC20 779 | Gen IC20 780 | Gen IC20 781 | Gen IC20 782 | Gen IC20 783 | Gen IC20 784 | Gen IC20 785 | Gen IC20 786 | Gen IC20 787 | Gen IC20 788 | Gen IC20 789 | Gen IC20 790 | Gen IC20 791 | Gen IC20 792 | Gen IC20 793 | Gen IC20 794 | Gen IC20 795 | Gen IC20 796 | Gen IC20 797 | Gen IC20 798 | Gen IC20 799 | Gen IC20 800 | Gen IC20 801 | Gen IC20 802 | Gen IC20 803 | Gen IC20 804 | Gen IC20 805 | Gen IC20 806 | Gen IC20 807 | Gen IC20 808 | Gen IC20 809 | Gen IC20 810 | Gen IC20 811 | Gen IC20 812 | Gen IC20 813 | Gen IC20 814 | Gen IC20 815 | Gen IC20 816 | Gen IC20 817 | Gen IC20 818 | Gen IC20 819 | Gen IC20 820 | Gen IC20 821 | Gen IC20 822 | Gen IC20 823 | Gen IC20 824 | Gen IC20 825 | Gen IC20 826 | Gen IC20 827 | Gen IC20 828 | Gen IC20 829 | Gen IC20 830 | Gen IC20 831 | Gen IC20 832 | Gen IC20 833 | Gen IC20 834 | Gen IC20 835 | Gen IC20 836 | Gen IC20 837 | Gen IC20 838 | Gen IC20 839 | Gen IC20 840 | Gen IC20 841 | Gen IC20 842 | Gen IC20 843 | Gen IC20 844 | Gen IC20 845 | Gen IC20 846 | Gen IC20 847 | Gen IC20 848 | Gen IC20 849 | Gen IC20 850 | Gen IC20 851 | Gen IC20 852 | Gen IC20 853 | Gen IC20 854 | Gen IC20 855 | Gen IC20 856 | Gen IC20 857 | Gen IC20 858 | Gen IC20 859 | Gen IC20 860 | Gen IC20 861 | Gen IC20 862 | Gen IC20 863 | Gen IC20 864 | Gen IC20 865 | Gen IC20 866 | Gen IC20 867 | Gen IC20 868 | Gen IC20 869 | Gen IC20 870 | Gen IC20 871 | Gen IC20 872 | Gen IC20 873 | Gen IC20 874 | Gen IC20 875 | Gen IC20 876 | Gen IC20 877 | Gen IC20 878 | Gen IC20 879 | Gen IC20 880 | Gen IC20 881 | Gen IC20 882 | Gen IC20 883 | Gen IC20 884 | Gen IC20 885 | Gen IC20 886 | Gen IC20 887 | Gen IC20 888 | Gen IC20 889 | Gen IC20 890 | Gen IC20 891 | Gen IC20 892 | Gen IC20 893 | Gen IC20 894 | Gen IC20 895 | Gen IC20 896 | Gen IC20 897 | Gen IC20 898 | Gen IC20 899 | Gen IC20 900 | Gen IC20 901 | Gen IC20 902 | Gen IC20 903 | Gen IC20 904 | Gen IC20 905 | Gen IC20 906 | Gen IC20 907 | Gen IC20 908 | Gen IC20 909 | Gen IC20 910 | Gen IC20 911 | Gen IC20 912 | Gen IC20 913 | Gen IC20 914 | Gen IC20 915 | Gen IC20 916 | Gen IC20 917 | Gen IC20 918 | Gen IC20 919 | Gen IC20 920 | Gen IC20 921 | Gen IC20 922 | Gen IC20 923 | Gen IC20 924 | Gen IC20 925 | Gen IC20 926 | Gen IC20 927 | Gen IC20 928 | Gen IC20 929 | Gen IC20 930 | Gen IC20 931 | Gen IC20 932 | Gen IC20 933 | Gen IC20 934 | Gen IC20 935 | Gen IC20 936 | Gen IC20 937 | Gen IC20 938 | Gen IC20 939 | Gen IC20 940 | Gen IC20 941 | Gen IC20 942 | Gen IC20 943 | Gen IC20 944 | Gen IC20 945 | Gen IC20 946 | Gen IC20 947 | Gen IC20 948 |

Supplementary Table S1. Overview on the abundance of all relatively quantified 5180 proteins

[illegible]



Supplementary Table S1. Overview on the abundance of all relatively quantified 5180 proteins

|  |         | MCF-7   |         |         |    |      |    |      |    |      |    | MDA-MB-231 |    |      |    |      |    |      |    |      |    |      |    |      |    |      |    |      |    |      |    |      |    |      |    |      |    |      |    |      |    |      |    |      |    |      |    |      |    |      |    |      |    |      |    |      |    |      |    |      |    |      |    |      |    |      |    |      |    |      |    |      |    |      |    |      |    |      |    |      |    |      |    |      |    |      |    |      |    |      |    |      |    |      |    |      |    |      |    |      |    |      |    |      |    |      |    |      |    |      |    |      |    |      |    |      |    |      |    |      |    |      |    |      |    |      |    |      |    |      |    |      |    |      |    |      |    |      |    |      |    |      |    |      |    |      |    |      |    |      |    |      |    |      |    |      |    |      |    |      |    |      |    |      |    |      |    |      |    |      |    |      |    |      |    |      |    |      |    |      |    |      |    |      |    |      |    |      |    |      |    |      |    |      |    |      |    |      |    |      |    |      |    |      |    |      |    |      |    |      |    |      |    |      |    |      |    |      |    |      |    |      |    |      |    |      |    |      |    |      |    |      |    |      |    |      |    |      |    |      |    |      |    |      |    |      |    |      |    |      |    |      |    |      |    |      |    |      |    |      |    |      |    |      |    |      |    |      |    |      |    |      |    |      |    |      |    |      |    |      |    |      |    |      |    |      |    |      |    |      |    |      |    |      |    |      |    |      |    |      |    |      |    |      |    |      |    |      |    |      |    |      |    |      |    |      |    |      |    |      |    |      |    |      |    |      |    |      |    |      |    |      |    |      |    |      |    |      |    |      |    |      |    |      |    |      |    |      |    |      |    |      |    |      |    |      |    |      |    |      |    |      |    |      |    |      |    |      |    |      |    |      |    |      |    |      |    |      |    |      |    |      |    |      |    |      |    |      |    |      |    |      |    |      |    |      |    |      |    |      |    |      |    |      |    |      |    |      |    |      |    |      |    |      |    |      |    |      |    |      |    |      |    |      |    |      |    |      |    |      |    |      |    |      |    |      |    |      |    |      |    |      |    |      |    |      |    |      |    |      |    |      |    |      |    |      |    |      |    |      |    |      |    |      |    |      |    |      |    |      |    |      |    |      |    |      |    |      |    |      |    |      |    |      |    |      |    |      |    |      |    |      |    |      |    |      |    |      |    |      |    |      |    |      |    |      |    |      |    |      |    |      |    |      |    |      |    |      |    |      |    |      |    |      |    |      |    |      |    |      |    |      |    |      |    |      |    |      |    |      |    |      |    |      |    |      |    |      |    |      |    |      |    |      |    |      |    |      |    |      |    |      |    |      |    |      |    |      |    |      |    |      |    |      |    |      |    |      |    |      |    |      |    |      |    |      |    |      |    |      |    |      |    |      |    |      |    |      |    |      |    |      |    |      |    |      |    |      |    |      |    |      |    |      |    |      |    |      |    |      |    |      |    |      |    |      |    |      |    |      |    |      |    |      |    |      |    |      |    |      |    |      |    |      |    |      |    |      |    |      |    |      |    |      |    |      |    |      |    |      |    |      |    |      |    |      |    |      |    |      |    |      |    |      |    |      |    |      |    |      |    |      |    |      |    |      |    |      |    |      |    |      |    |      |    |      |    |      |    |      |    |      |    |      |    |      |    |      |    |      |    |      |    |      |    |      |    |      |    |      |    |      |    |      |    |      |    |      |    |      |    |      |    |      |    |      |    |      |    |      |    |      |    |      |    |      |    |      |    |      |    |      |    |      |    |      |    |      |    |      |    |      |    |      |    |      |    |      |    |      |    |      |    |      |    |      |    |      |    |      |    |      |    |      |    |      |    |      |    |      |    |      |    |      |    |      |    |      |    |      |    |      |    |      |    |      |    |      |    |      |    |      |    |      |    |      |    |      |    |      |    |      |    |      |    |      |    |      |    |      |    |      |    |      |    |      |    |      |    |      |    |      |    |      |    |      |    |      |    |      |    |      |    |      |    |      |    |      |    |      |    |      |    |      |    |      |    |      |    |      |    |      |    |      |    |      |    |      |    |      |    |      |    |      |    |      |    |      |    |      |    |      |    |      |    |      |    |      |    |      |    |      |    |      |    |      |    |      |    |      |    |      |    |      |    |      |    |      |    |      |    |      |    |      |    |      |    |      |    |      |    |      |    |      |    |      |    |      |    |      |    |      |    |      |    |      |    |      |    |      |    |      |    |      |    |      |    |      |    |      |    |      |    |      |    |      |    |      |    |      |    |      |    |      |    |      |    |      |    |      |    |      |    |      |    |      |    |      |    |      |    |      |    |      |    |      |    |      |    |      |    |      |    |      |    |      |    |      |    |      |    |      |    |
|--|---------|---------|---------|---------|----|------|----|------|----|------|----|------------|----|------|----|------|----|------|----|------|----|------|----|------|----|------|----|------|----|------|----|------|----|------|----|------|----|------|----|------|----|------|----|------|----|------|----|------|----|------|----|------|----|------|----|------|----|------|----|------|----|------|----|------|----|------|----|------|----|------|----|------|----|------|----|------|----|------|----|------|----|------|----|------|----|------|----|------|----|------|----|------|----|------|----|------|----|------|----|------|----|------|----|------|----|------|----|------|----|------|----|------|----|------|----|------|----|------|----|------|----|------|----|------|----|------|----|------|----|------|----|------|----|------|----|------|----|------|----|------|----|------|----|------|----|------|----|------|----|------|----|------|----|------|----|------|----|------|----|------|----|------|----|------|----|------|----|------|----|------|----|------|----|------|----|------|----|------|----|------|----|------|----|------|----|------|----|------|----|------|----|------|----|------|----|------|----|------|----|------|----|------|----|------|----|------|----|------|----|------|----|------|----|------|----|------|----|------|----|------|----|------|----|------|----|------|----|------|----|------|----|------|----|------|----|------|----|------|----|------|----|------|----|------|----|------|----|------|----|------|----|------|----|------|----|------|----|------|----|------|----|------|----|------|----|------|----|------|----|------|----|------|----|------|----|------|----|------|----|------|----|------|----|------|----|------|----|------|----|------|----|------|----|------|----|------|----|------|----|------|----|------|----|------|----|------|----|------|----|------|----|------|----|------|----|------|----|------|----|------|----|------|----|------|----|------|----|------|----|------|----|------|----|------|----|------|----|------|----|------|----|------|----|------|----|------|----|------|----|------|----|------|----|------|----|------|----|------|----|------|----|------|----|------|----|------|----|------|----|------|----|------|----|------|----|------|----|------|----|------|----|------|----|------|----|------|----|------|----|------|----|------|----|------|----|------|----|------|----|------|----|------|----|------|----|------|----|------|----|------|----|------|----|------|----|------|----|------|----|------|----|------|----|------|----|------|----|------|----|------|----|------|----|------|----|------|----|------|----|------|----|------|----|------|----|------|----|------|----|------|----|------|----|------|----|------|----|------|----|------|----|------|----|------|----|------|----|------|----|------|----|------|----|------|----|------|----|------|----|------|----|------|----|------|----|------|----|------|----|------|----|------|----|------|----|------|----|------|----|------|----|------|----|------|----|------|----|------|----|------|----|------|----|------|----|------|----|------|----|------|----|------|----|------|----|------|----|------|----|------|----|------|----|------|----|------|----|------|----|------|----|------|----|------|----|------|----|------|----|------|----|------|----|------|----|------|----|------|----|------|----|------|----|------|----|------|----|------|----|------|----|------|----|------|----|------|----|------|----|------|----|------|----|------|----|------|----|------|----|------|----|------|----|------|----|------|----|------|----|------|----|------|----|------|----|------|----|------|----|------|----|------|----|------|----|------|----|------|----|------|----|------|----|------|----|------|----|------|----|------|----|------|----|------|----|------|----|------|----|------|----|------|----|------|----|------|----|------|----|------|----|------|----|------|----|------|----|------|----|------|----|------|----|------|----|------|----|------|----|------|----|------|----|------|----|------|----|------|----|------|----|------|----|------|----|------|----|------|----|------|----|------|----|------|----|------|----|------|----|------|----|------|----|------|----|------|----|------|----|------|----|------|----|------|----|------|----|------|----|------|----|------|----|------|----|------|----|------|----|------|----|------|----|------|----|------|----|------|----|------|----|------|----|------|----|------|----|------|----|------|----|------|----|------|----|------|----|------|----|------|----|------|----|------|----|------|----|------|----|------|----|------|----|------|----|------|----|------|----|------|----|------|----|------|----|------|----|------|----|------|----|------|----|------|----|------|----|------|----|------|----|------|----|------|----|------|----|------|----|------|----|------|----|------|----|------|----|------|----|------|----|------|----|------|----|------|----|------|----|------|----|------|----|------|----|------|----|------|----|------|----|------|----|------|----|------|----|------|----|------|----|------|----|------|----|------|----|------|----|------|----|------|----|------|----|------|----|------|----|------|----|------|----|------|----|------|----|------|----|------|----|------|----|------|----|------|----|------|----|------|----|------|----|------|----|------|----|------|----|------|----|------|----|------|----|------|----|------|----|------|----|------|----|------|----|------|----|------|----|------|----|------|----|------|----|------|----|------|----|------|----|------|----|------|----|------|----|------|----|------|----|------|----|------|----|------|----|------|----|------|----|------|----|------|----|------|----|------|----|------|----|------|----|------|----|------|----|------|----|------|----|------|----|------|----|------|----|------|----|------|----|------|----|------|----|------|----|------|----|------|----|------|----|------|----|------|----|------|----|------|----|------|----|------|----|------|----|------|----|------|----|------|----|
|  | UniProt | control | control | control | Da | IC20 | Da | IC20 | Da | IC20 | Da | IC20       | Da | IC20 | Da | IC20 | Da | IC20 | Da | IC20 | Da | IC20 | Da | IC20 | Da | IC20 | Da | IC20 | Da | IC20 | Da | IC20 | Da | IC20 | Da | IC20 | Da | IC20 | Da | IC20 | Da | IC20 | Da | IC20 | Da | IC20 | Da | IC20 | Da | IC20 | Da | IC20 | Da | IC20 | Da | IC20 | Da | IC20 | Da | IC20 | Da | IC20 | Da | IC20 | Da | IC20 | Da | IC20 | Da | IC20 | Da | IC20 | Da | IC20 | Da | IC20 | Da | IC20 | Da | IC20 | Da | IC20 | Da | IC20 | Da | IC20 | Da | IC20 | Da | IC20 | Da | IC20 | Da | IC20 | Da | IC20 | Da | IC20 | Da | IC20 | Da | IC20 | Da | IC20 | Da | IC20 | Da | IC20 | Da | IC20 | Da | IC20 | Da | IC20 | Da | IC20 | Da | IC20 | Da | IC20 | Da | IC20 | Da | IC20 | Da | IC20 | Da | IC20 | Da | IC20 | Da | IC20 | Da | IC20 | Da | IC20 | Da | IC20 | Da | IC20 | Da | IC20 | Da | IC20 | Da | IC20 | Da | IC20 | Da | IC20 | Da | IC20 | Da | IC20 | Da | IC20 | Da | IC20 | Da | IC20 | Da | IC20 | Da | IC20 | Da | IC20 | Da | IC20 | Da | IC20 | Da | IC20 | Da | IC20 | Da | IC20 | Da | IC20 | Da | IC20 | Da | IC20 | Da | IC20 | Da | IC20 | Da | IC20 | Da | IC20 | Da | IC20 | Da | IC20 | Da | IC20 | Da | IC20 | Da | IC20 | Da | IC20 | Da | IC20 | Da | IC20 | Da | IC20 | Da | IC20 | Da | IC20 | Da | IC20 | Da | IC20 | Da | IC20 | Da | IC20 | Da | IC20 | Da | IC20 | Da | IC20 | Da | IC20 | Da | IC20 | Da | IC20 | Da | IC20 | Da | IC20 | Da | IC20 | Da | IC20 | Da | IC20 | Da | IC20 | Da | IC20 | Da | IC20 | Da | IC20 | Da | IC20 | Da | IC20 | Da | IC20 | Da | IC20 | Da | IC20 | Da | IC20 | Da | IC20 | Da | IC20 | Da | IC20 | Da | IC20 | Da | IC20 | Da | IC20 | Da | IC20 | Da | IC20 | Da | IC20 | Da | IC20 | Da | IC20 | Da | IC20 | Da | IC20 | Da | IC20 | Da | IC20 | Da | IC20 | Da | IC20 | Da | IC20 | Da | IC20 | Da | IC20 | Da | IC20 | Da | IC20 | Da | IC20 | Da | IC20 | Da | IC20 | Da | IC20 | Da | IC20 | Da | IC20 | Da | IC20 | Da | IC20 | Da | IC20 | Da | IC20 | Da | IC20 | Da | IC20 | Da | IC20 | Da | IC20 | Da | IC20 | Da | IC20 | Da | IC20 | Da | IC20 | Da | IC20 | Da | IC20 | Da | IC20 | Da | IC20 | Da | IC20 | Da | IC20 | Da | IC20 | Da | IC20 | Da | IC20 | Da | IC20 | Da | IC20 | Da | IC20 | Da | IC20 | Da | IC20 | Da | IC20 | Da | IC20 | Da | IC20 | Da | IC20 | Da | IC20 | Da | IC20 | Da | IC20 | Da | IC20 | Da | IC20 | Da | IC20 | Da | IC20 | Da | IC20 | Da | IC20 | Da | IC20 | Da | IC20 | Da | IC20 | Da | IC20 | Da | IC20 | Da | IC20 | Da | IC20 | Da | IC20 | Da | IC20 | Da | IC20 | Da | IC20 | Da | IC20 | Da | IC20 | Da | IC20 | Da | IC20 | Da | IC20 | Da | IC20 | Da | IC20 | Da | IC20 | Da | IC20 | Da | IC20 | Da | IC20 | Da | IC20 | Da | IC20 | Da | IC20 | Da | IC20 | Da | IC20 | Da | IC20 | Da | IC20 | Da | IC20 | Da | IC20 | Da | IC20 | Da | IC20 | Da | IC20 | Da | IC20 | Da | IC20 | Da | IC20 | Da | IC20 | Da | IC20 | Da | IC20 | Da | IC20 | Da | IC20 | Da | IC20 | Da | IC20 | Da | IC20 | Da | IC20 | Da | IC20 | Da | IC20 | Da | IC20 | Da | IC20 | Da | IC20 | Da | IC20 | Da | IC20 | Da | IC20 | Da | IC20 | Da | IC20 | Da | IC20 | Da | IC20 | Da | IC20 | Da | IC20 | Da | IC20 | Da | IC20 | Da | IC20 | Da | IC20 | Da | IC20 | Da | IC20 | Da | IC20 | Da | IC20 | Da | IC20 | Da | IC20 | Da | IC20 | Da | IC20 | Da | IC20 | Da | IC20 | Da | IC20 | Da | IC20 | Da | IC20 | Da | IC20 | Da | IC20 | Da | IC20 | Da | IC20 | Da | IC20 | Da | IC20 | Da | IC20 | Da | IC20 | Da | IC20 | Da | IC20 | Da | IC20 | Da | IC20 | Da | IC20 | Da | IC20 | Da | IC20 | Da | IC20 | Da | IC20 | Da | IC20 | Da | IC20 | Da | IC20 | Da | IC20 | Da | IC20 | Da | IC20 | Da | IC20 | Da | IC20 | Da | IC20 | Da | IC20 | Da | IC20 | Da | IC20 | Da | IC20 | Da | IC20 | Da | IC20 | Da | IC20 | Da | IC20 | Da | IC20 | Da | IC20 | Da | IC20 | Da | IC20 | Da | IC20 | Da | IC20 | Da | IC20 | Da | IC20 | Da | IC20 | Da | IC20 | Da | IC20 | Da | IC20 | Da | IC20 | Da | IC20 | Da | IC20 | Da | IC20 | Da | IC20 | Da | IC20 | Da | IC20 | Da | IC20 | Da | IC20 | Da | IC20 | Da | IC20 | Da | IC20 | Da | IC20 | Da | IC20 | Da | IC20 | Da | IC20 | Da | IC20 | Da | IC20 | Da | IC20 | Da | IC20 | Da | IC20 | Da | IC20 | Da | IC20 | Da | IC20 | Da | IC20 | Da | IC20 | Da | IC20 | Da | IC20 | Da | IC20 | Da | IC20 | Da | IC20 | Da | IC20 | Da | IC20 | Da | IC20 | Da | IC20 | Da | IC20 | Da | IC20 | Da | IC20 | Da | IC20 | Da | IC20 | Da | IC20 | Da | IC20 | Da | IC20 | Da | IC20 | Da | IC20 | Da | IC20 | Da | IC20 | Da | IC20 | Da | IC20 | Da | IC20 | Da | IC20 | Da | IC20 | Da | IC20 | Da | IC20 | Da | IC20 | Da | IC20 | Da | IC20 | Da | IC20 | Da | IC20 | Da | IC20 | Da | IC20 | Da | IC20 | Da | IC20 | Da | IC20 | Da | IC20 | Da | IC20 | Da | IC20 | Da | IC20 | Da | IC20 | Da | IC20 | Da | IC20 | Da | IC20 | Da | IC20 | Da | IC20 | Da | IC20 | Da | IC20 | Da | IC20 | Da | IC20 | Da | IC20 | Da | IC20 | Da | IC20 | Da | IC20 | Da | IC20 | Da | IC20 | Da | IC20 | Da | IC20 | Da | IC20 | Da | IC20 | Da | IC20 | Da | IC20 | Da | IC20 | Da | IC20 | Da | IC20 | Da | IC20 | Da | IC20 | Da | IC20 | Da | IC20 | Da | IC20 | Da | IC20 | Da | IC20 | Da | IC20 | Da | IC20 | Da | IC20 | Da | IC20 | Da | IC20 | Da | IC20 | Da | IC20 | Da | IC20 | Da | IC20 | Da | IC20 | Da | IC20 | Da | IC20 | Da | IC20 | Da | IC20 | Da | IC20 | Da | IC20 | Da | IC20 | Da | IC20 | Da | IC20 | Da | IC20 | Da | IC20 | Da | IC20 | Da | IC20 | Da | IC20 | Da | IC20 | Da | IC20 | Da | IC20 | Da | IC20 | Da | IC20 | Da | IC20 | Da | IC20 | Da | IC20 | Da | IC20 | Da | IC20 | Da | IC20 | Da | IC20 | Da | IC20 | Da | IC20 | Da | IC20 | Da | IC20 | Da | IC20 | Da | IC20 | Da | IC20 | Da | IC20 | Da | IC20 | Da | IC20 | Da | IC20 | Da | IC20 | Da | IC20 | Da | IC20 | Da | IC20 | Da | IC20 | Da | IC20 | Da | IC20 | Da | IC20 | Da | IC20 | Da | IC20 | Da | IC20 | Da | IC20 | Da | IC20 | Da | IC20 | Da | IC20 | Da | IC20 | Da | IC20 | Da | IC20 | Da | IC20 | Da | IC20 | Da | IC20 | Da | IC20 | Da | IC20 | Da | IC20 | Da | IC20 | Da | IC20 | Da | IC20 | Da | IC20 | Da | IC20 | Da | IC20 | Da | IC20 | Da | IC20 | Da | IC20 | Da | IC20 | Da | IC20 | Da | IC20 | Da | IC20 | Da | IC20 | Da |



Supplementary Table S1. Overview on the abundance of all relatively quantified 5180 proteins

| Protein name |  | MCF-7   |            |            |            |            |            |            |            |            |            | MDA-MB-231 |            |            |            |            |            |            |            |            |            | MDA-MB-321 |            |            |            |            |            |            |            |            |            | unique to MCF-7 |            |            |            |            |            |            |            |            |            | unique to MDA-MB-321 |            |            |            |            |            |            |            |            |            |            |            |            |            |            |            |            |            |            |            |            |            |            |            |            |            |            |            |            |            |            |            |            |            |            |            |            |            |            |            |            |            |            |            |            |            |            |            |            |            |            |            |            |            |            |            |            |            |            |            |            |            |            |             |             |             |             |             |             |             |             |             |             |             |             |             |             |             |             |             |             |             |             |             |             |             |             |             |             |             |             |             |             |             |             |             |             |             |             |             |             |             |             |             |             |             |             |             |             |             |             |             |             |             |             |             |             |             |             |             |             |             |             |             |             |             |             |             |             |             |             |             |             |             |             |             |             |             |             |             |             |             |             |             |             |             |             |             |             |             |             |             |             |             |             |             |             |             |             |             |             |             |             |             |             |             |             |             |             |             |             |             |             |             |             |             |             |             |             |             |             |             |             |             |             |             |             |             |             |             |             |             |             |             |             |             |             |             |             |             |             |             |             |             |             |             |             |             |             |             |             |             |             |             |             |             |             |             |             |             |             |             |             |             |             |             |             |             |             |             |             |             |             |             |             |             |             |             |             |             |             |             |             |             |             |             |             |             |             |             |             |             |             |             |             |             |             |             |             |             |             |             |             |             |             |             |             |             |             |             |             |             |             |             |             |             |             |             |             |             |             |             |             |             |             |             |             |             |             |             |             |             |             |             |             |             |             |             |             |             |             |             |             |             |             |             |             |             |             |             |             |             |             |             |             |             |             |             |             |             |             |             |             |             |             |             |             |             |             |             |             |             |             |             |             |             |             |             |             |             |             |             |             |             |             |             |             |             |             |             |             |             |             |             |             |             |             |             |             |             |             |             |             |             |             |             |             |             |             |             |             |             |             |             |             |             |             |             |             |             |             |             |             |             |             |             |             |             |             |             |             |             |             |             |             |             |             |             |             |             |             |             |             |             |             |             |             |             |             |             |             |             |             |             |             |             |             |             |             |             |             |             |             |             |             |             |             |             |             |             |             |             |             |             |             |             |             |             |             |             |             |             |             |             |             |             |             |             |             |             |             |             |             |             |             |             |             |             |             |             |             |             |             |             |             |             |             |             |             |             |             |             |             |             |             |             |             |             |             |             |             |             |             |             |             |             |             |             |             |             |             |             |             |             |             |             |             |             |             |             |             |             |             |             |             |             |             |             |             |             |             |             |             |             |             |             |             |             |             |             |             |             |             |             |             |             |             |             |             |             |             |             |             |             |             |             |             |             |             |             |             |             |             |             |             |             |             |             |             |             |             |             |             |             |             |             |             |             |             |             |             |             |             |             |             |             |             |             |             |             |             |             |             |             |             |             |             |             |             |             |             |             |             |             |             |             |             |             |             |             |             |             |             |             |             |             |             |             |             |             |             |             |             |             |             |             |             |             |             |             |             |             |             |             |             |             |             |             |             |             |             |             |             |             |             |             |             |             |             |             |             |             |             |             |             |             |             |             |             |             |             |             |             |             |             |             |             |             |             |             |             |             |             |             |             |             |             |             |             |             |             |             |             |             |             |             |             |             |             |             |             |             |             |             |             |             |             |             |             |             |             |             |             |             |             |             |             |             |             |             |             |             |             |             |             |             |             |             |             |             |             |             |             |             |             |             |             |             |             |             |             |             |             |             |             |             |             |             |             |             |             |             |             |             |             |             |             |             |             |             |             |             |             |             |             |             |             |             |             |             |             |             |             |             |             |             |             |             |             |             |             |             |             |             |             |             |             |             |             |             |             |             |             |             |             |             |             |             |             |             |             |             |             |             |             |             |             |             |             |             |             |             |             |             |             |             |             |             |             |             |             |             |             |             |             |             |             |             |             |             |             |             |             |             |             |             |             |             |             |             |             |             |             |             |             |             |             |             |             |             |             |             |             |             |             |             |             |             |             |             |             |             |             |             |             |             |             |             |             |             |             |             |             |             |             |        |
|--------------|--|---------|------------|------------|------------|------------|------------|------------|------------|------------|------------|------------|------------|------------|------------|------------|------------|------------|------------|------------|------------|------------|------------|------------|------------|------------|------------|------------|------------|------------|------------|-----------------|------------|------------|------------|------------|------------|------------|------------|------------|------------|----------------------|------------|------------|------------|------------|------------|------------|------------|------------|------------|------------|------------|------------|------------|------------|------------|------------|------------|------------|------------|------------|------------|------------|------------|------------|------------|------------|------------|------------|------------|------------|------------|------------|------------|------------|------------|------------|------------|------------|------------|------------|------------|------------|------------|------------|------------|------------|------------|------------|------------|------------|------------|------------|------------|------------|------------|------------|------------|------------|------------|------------|------------|------------|-------------|-------------|-------------|-------------|-------------|-------------|-------------|-------------|-------------|-------------|-------------|-------------|-------------|-------------|-------------|-------------|-------------|-------------|-------------|-------------|-------------|-------------|-------------|-------------|-------------|-------------|-------------|-------------|-------------|-------------|-------------|-------------|-------------|-------------|-------------|-------------|-------------|-------------|-------------|-------------|-------------|-------------|-------------|-------------|-------------|-------------|-------------|-------------|-------------|-------------|-------------|-------------|-------------|-------------|-------------|-------------|-------------|-------------|-------------|-------------|-------------|-------------|-------------|-------------|-------------|-------------|-------------|-------------|-------------|-------------|-------------|-------------|-------------|-------------|-------------|-------------|-------------|-------------|-------------|-------------|-------------|-------------|-------------|-------------|-------------|-------------|-------------|-------------|-------------|-------------|-------------|-------------|-------------|-------------|-------------|-------------|-------------|-------------|-------------|-------------|-------------|-------------|-------------|-------------|-------------|-------------|-------------|-------------|-------------|-------------|-------------|-------------|-------------|-------------|-------------|-------------|-------------|-------------|-------------|-------------|-------------|-------------|-------------|-------------|-------------|-------------|-------------|-------------|-------------|-------------|-------------|-------------|-------------|-------------|-------------|-------------|-------------|-------------|-------------|-------------|-------------|-------------|-------------|-------------|-------------|-------------|-------------|-------------|-------------|-------------|-------------|-------------|-------------|-------------|-------------|-------------|-------------|-------------|-------------|-------------|-------------|-------------|-------------|-------------|-------------|-------------|-------------|-------------|-------------|-------------|-------------|-------------|-------------|-------------|-------------|-------------|-------------|-------------|-------------|-------------|-------------|-------------|-------------|-------------|-------------|-------------|-------------|-------------|-------------|-------------|-------------|-------------|-------------|-------------|-------------|-------------|-------------|-------------|-------------|-------------|-------------|-------------|-------------|-------------|-------------|-------------|-------------|-------------|-------------|-------------|-------------|-------------|-------------|-------------|-------------|-------------|-------------|-------------|-------------|-------------|-------------|-------------|-------------|-------------|-------------|-------------|-------------|-------------|-------------|-------------|-------------|-------------|-------------|-------------|-------------|-------------|-------------|-------------|-------------|-------------|-------------|-------------|-------------|-------------|-------------|-------------|-------------|-------------|-------------|-------------|-------------|-------------|-------------|-------------|-------------|-------------|-------------|-------------|-------------|-------------|-------------|-------------|-------------|-------------|-------------|-------------|-------------|-------------|-------------|-------------|-------------|-------------|-------------|-------------|-------------|-------------|-------------|-------------|-------------|-------------|-------------|-------------|-------------|-------------|-------------|-------------|-------------|-------------|-------------|-------------|-------------|-------------|-------------|-------------|-------------|-------------|-------------|-------------|-------------|-------------|-------------|-------------|-------------|-------------|-------------|-------------|-------------|-------------|-------------|-------------|-------------|-------------|-------------|-------------|-------------|-------------|-------------|-------------|-------------|-------------|-------------|-------------|-------------|-------------|-------------|-------------|-------------|-------------|-------------|-------------|-------------|-------------|-------------|-------------|-------------|-------------|-------------|-------------|-------------|-------------|-------------|-------------|-------------|-------------|-------------|-------------|-------------|-------------|-------------|-------------|-------------|-------------|-------------|-------------|-------------|-------------|-------------|-------------|-------------|-------------|-------------|-------------|-------------|-------------|-------------|-------------|-------------|-------------|-------------|-------------|-------------|-------------|-------------|-------------|-------------|-------------|-------------|-------------|-------------|-------------|-------------|-------------|-------------|-------------|-------------|-------------|-------------|-------------|-------------|-------------|-------------|-------------|-------------|-------------|-------------|-------------|-------------|-------------|-------------|-------------|-------------|-------------|-------------|-------------|-------------|-------------|-------------|-------------|-------------|-------------|-------------|-------------|-------------|-------------|-------------|-------------|-------------|-------------|-------------|-------------|-------------|-------------|-------------|-------------|-------------|-------------|-------------|-------------|-------------|-------------|-------------|-------------|-------------|-------------|-------------|-------------|-------------|-------------|-------------|-------------|-------------|-------------|-------------|-------------|-------------|-------------|-------------|-------------|-------------|-------------|-------------|-------------|-------------|-------------|-------------|-------------|-------------|-------------|-------------|-------------|-------------|-------------|-------------|-------------|-------------|-------------|-------------|-------------|-------------|-------------|-------------|-------------|-------------|-------------|-------------|-------------|-------------|-------------|-------------|-------------|-------------|-------------|-------------|-------------|-------------|-------------|-------------|-------------|-------------|-------------|-------------|-------------|-------------|-------------|-------------|-------------|-------------|-------------|-------------|-------------|-------------|-------------|-------------|-------------|-------------|-------------|-------------|-------------|-------------|-------------|-------------|-------------|-------------|-------------|-------------|-------------|-------------|-------------|-------------|-------------|-------------|-------------|-------------|-------------|-------------|-------------|-------------|-------------|-------------|-------------|-------------|-------------|-------------|-------------|-------------|-------------|-------------|-------------|-------------|-------------|-------------|-------------|-------------|-------------|-------------|-------------|-------------|-------------|-------------|-------------|-------------|-------------|-------------|-------------|-------------|-------------|-------------|-------------|-------------|-------------|-------------|-------------|-------------|-------------|-------------|-------------|-------------|-------------|-------------|-------------|-------------|-------------|-------------|-------------|-------------|-------------|-------------|-------------|-------------|-------------|-------------|-------------|-------------|-------------|-------------|-------------|-------------|-------------|-------------|-------------|-------------|-------------|-------------|-------------|-------------|-------------|-------------|-------------|-------------|-------------|-------------|-------------|-------------|-------------|-------------|-------------|-------------|-------------|-------------|-------------|-------------|-------------|-------------|-------------|-------------|-------------|-------------|-------------|-------------|-------------|-------------|-------------|-------------|-------------|-------------|-------------|-------------|-------------|-------------|-------------|-------------|-------------|-------------|-------------|-------------|-------------|-------------|-------------|-------------|-------------|-------------|-------------|-------------|-------------|-------------|-------------|-------------|-------------|-------------|-------------|-------------|-------------|-------------|-------------|-------------|-------------|-------------|-------------|-------------|-------------|-------------|-------------|-------------|-------------|-------------|-------------|-------------|-------------|-------------|-------------|-------------|-------------|-------------|-------------|-------------|-------------|-------------|-------------|-------------|-------------|-------------|-------------|-------------|-------------|-------------|-------------|-------------|-------------|-------------|-------------|-------------|-------------|-------------|-------------|-------------|-------------|-------------|-------------|-------------|-------------|-------------|-------------|-------------|-------------|-------------|-------------|-------------|-------------|-------------|-------------|-------------|-------------|-------------|-------------|-------------|-------------|-------------|-------------|-------------|-------------|-------------|-------------|-------------|-------------|-------------|-------------|-------------|-------------|-------------|-------------|-------------|-------------|-------------|-------------|-------------|-------------|-------------|-------------|-------------|-------------|-------------|-------------|-------------|-------------|-------------|-------------|-------------|-------------|-------------|-------------|-------------|-------------|-------------|-------------|-------------|-------------|-------------|-------------|-------------|-------------|-------------|-------------|-------------|-------------|-------------|-------------|-------------|-------------|-------------|-------------|-------------|-------------|-------------|-------------|-------------|-------------|-------------|-------------|-------------|-------------|-------------|-------------|--------|
|              |  | Uniprot | control 01 | control 02 | control 03 | DC2 K20 01 | DC2 K20 02 | DC2 K20 03 | DC2 K20 04 | DC2 K20 05 | DC2 K20 06 | DC2 K20 07 | DC2 K20 08 | DC2 K20 09 | DC2 K20 10 | DC2 K20 11 | DC2 K20 12 | DC2 K20 13 | DC2 K20 14 | DC2 K20 15 | DC2 K20 16 | DC2 K20 17 | DC2 K20 18 | DC2 K20 19 | DC2 K20 20 | DC2 K20 21 | DC2 K20 22 | DC2 K20 23 | DC2 K20 24 | DC2 K20 25 | DC2 K20 26 | DC2 K20 27      | DC2 K20 28 | DC2 K20 29 | DC2 K20 30 | DC2 K20 31 | DC2 K20 32 | DC2 K20 33 | DC2 K20 34 | DC2 K20 35 | DC2 K20 36 | DC2 K20 37           | DC2 K20 38 | DC2 K20 39 | DC2 K20 40 | DC2 K20 41 | DC2 K20 42 | DC2 K20 43 | DC2 K20 44 | DC2 K20 45 | DC2 K20 46 | DC2 K20 47 | DC2 K20 48 | DC2 K20 49 | DC2 K20 50 | DC2 K20 51 | DC2 K20 52 | DC2 K20 53 | DC2 K20 54 | DC2 K20 55 | DC2 K20 56 | DC2 K20 57 | DC2 K20 58 | DC2 K20 59 | DC2 K20 60 | DC2 K20 61 | DC2 K20 62 | DC2 K20 63 | DC2 K20 64 | DC2 K20 65 | DC2 K20 66 | DC2 K20 67 | DC2 K20 68 | DC2 K20 69 | DC2 K20 70 | DC2 K20 71 | DC2 K20 72 | DC2 K20 73 | DC2 K20 74 | DC2 K20 75 | DC2 K20 76 | DC2 K20 77 | DC2 K20 78 | DC2 K20 79 | DC2 K20 80 | DC2 K20 81 | DC2 K20 82 | DC2 K20 83 | DC2 K20 84 | DC2 K20 85 | DC2 K20 86 | DC2 K20 87 | DC2 K20 88 | DC2 K20 89 | DC2 K20 90 | DC2 K20 91 | DC2 K20 92 | DC2 K20 93 | DC2 K20 94 | DC2 K20 95 | DC2 K20 96 | DC2 K20 97 | DC2 K20 98 | DC2 K20 99 | DC2 K20 100 | DC2 K20 101 | DC2 K20 102 | DC2 K20 103 | DC2 K20 104 | DC2 K20 105 | DC2 K20 106 | DC2 K20 107 | DC2 K20 108 | DC2 K20 109 | DC2 K20 110 | DC2 K20 111 | DC2 K20 112 | DC2 K20 113 | DC2 K20 114 | DC2 K20 115 | DC2 K20 116 | DC2 K20 117 | DC2 K20 118 | DC2 K20 119 | DC2 K20 120 | DC2 K20 121 | DC2 K20 122 | DC2 K20 123 | DC2 K20 124 | DC2 K20 125 | DC2 K20 126 | DC2 K20 127 | DC2 K20 128 | DC2 K20 129 | DC2 K20 130 | DC2 K20 131 | DC2 K20 132 | DC2 K20 133 | DC2 K20 134 | DC2 K20 135 | DC2 K20 136 | DC2 K20 137 | DC2 K20 138 | DC2 K20 139 | DC2 K20 140 | DC2 K20 141 | DC2 K20 142 | DC2 K20 143 | DC2 K20 144 | DC2 K20 145 | DC2 K20 146 | DC2 K20 147 | DC2 K20 148 | DC2 K20 149 | DC2 K20 150 | DC2 K20 151 | DC2 K20 152 | DC2 K20 153 | DC2 K20 154 | DC2 K20 155 | DC2 K20 156 | DC2 K20 157 | DC2 K20 158 | DC2 K20 159 | DC2 K20 160 | DC2 K20 161 | DC2 K20 162 | DC2 K20 163 | DC2 K20 164 | DC2 K20 165 | DC2 K20 166 | DC2 K20 167 | DC2 K20 168 | DC2 K20 169 | DC2 K20 170 | DC2 K20 171 | DC2 K20 172 | DC2 K20 173 | DC2 K20 174 | DC2 K20 175 | DC2 K20 176 | DC2 K20 177 | DC2 K20 178 | DC2 K20 179 | DC2 K20 180 | DC2 K20 181 | DC2 K20 182 | DC2 K20 183 | DC2 K20 184 | DC2 K20 185 | DC2 K20 186 | DC2 K20 187 | DC2 K20 188 | DC2 K20 189 | DC2 K20 190 | DC2 K20 191 | DC2 K20 192 | DC2 K20 193 | DC2 K20 194 | DC2 K20 195 | DC2 K20 196 | DC2 K20 197 | DC2 K20 198 | DC2 K20 199 | DC2 K20 200 | DC2 K20 201 | DC2 K20 202 | DC2 K20 203 | DC2 K20 204 | DC2 K20 205 | DC2 K20 206 | DC2 K20 207 | DC2 K20 208 | DC2 K20 209 | DC2 K20 210 | DC2 K20 211 | DC2 K20 212 | DC2 K20 213 | DC2 K20 214 | DC2 K20 215 | DC2 K20 216 | DC2 K20 217 | DC2 K20 218 | DC2 K20 219 | DC2 K20 220 | DC2 K20 221 | DC2 K20 222 | DC2 K20 223 | DC2 K20 224 | DC2 K20 225 | DC2 K20 226 | DC2 K20 227 | DC2 K20 228 | DC2 K20 229 | DC2 K20 230 | DC2 K20 231 | DC2 K20 232 | DC2 K20 233 | DC2 K20 234 | DC2 K20 235 | DC2 K20 236 | DC2 K20 237 | DC2 K20 238 | DC2 K20 239 | DC2 K20 240 | DC2 K20 241 | DC2 K20 242 | DC2 K20 243 | DC2 K20 244 | DC2 K20 245 | DC2 K20 246 | DC2 K20 247 | DC2 K20 248 | DC2 K20 249 | DC2 K20 250 | DC2 K20 251 | DC2 K20 252 | DC2 K20 253 | DC2 K20 254 | DC2 K20 255 | DC2 K20 256 | DC2 K20 257 | DC2 K20 258 | DC2 K20 259 | DC2 K20 260 | DC2 K20 261 | DC2 K20 262 | DC2 K20 263 | DC2 K20 264 | DC2 K20 265 | DC2 K20 266 | DC2 K20 267 | DC2 K20 268 | DC2 K20 269 | DC2 K20 270 | DC2 K20 271 | DC2 K20 272 | DC2 K20 273 | DC2 K20 274 | DC2 K20 275 | DC2 K20 276 | DC2 K20 277 | DC2 K20 278 | DC2 K20 279 | DC2 K20 280 | DC2 K20 281 | DC2 K20 282 | DC2 K20 283 | DC2 K20 284 | DC2 K20 285 | DC2 K20 286 | DC2 K20 287 | DC2 K20 288 | DC2 K20 289 | DC2 K20 290 | DC2 K20 291 | DC2 K20 292 | DC2 K20 293 | DC2 K20 294 | DC2 K20 295 | DC2 K20 296 | DC2 K20 297 | DC2 K20 298 | DC2 K20 299 | DC2 K20 300 | DC2 K20 301 | DC2 K20 302 | DC2 K20 303 | DC2 K20 304 | DC2 K20 305 | DC2 K20 306 | DC2 K20 307 | DC2 K20 308 | DC2 K20 309 | DC2 K20 310 | DC2 K20 311 | DC2 K20 312 | DC2 K20 313 | DC2 K20 314 | DC2 K20 315 | DC2 K20 316 | DC2 K20 317 | DC2 K20 318 | DC2 K20 319 | DC2 K20 320 | DC2 K20 321 | DC2 K20 322 | DC2 K20 323 | DC2 K20 324 | DC2 K20 325 | DC2 K20 326 | DC2 K20 327 | DC2 K20 328 | DC2 K20 329 | DC2 K20 330 | DC2 K20 331 | DC2 K20 332 | DC2 K20 333 | DC2 K20 334 | DC2 K20 335 | DC2 K20 336 | DC2 K20 337 | DC2 K20 338 | DC2 K20 339 | DC2 K20 340 | DC2 K20 341 | DC2 K20 342 | DC2 K20 343 | DC2 K20 344 | DC2 K20 345 | DC2 K20 346 | DC2 K20 347 | DC2 K20 348 | DC2 K20 349 | DC2 K20 350 | DC2 K20 351 | DC2 K20 352 | DC2 K20 353 | DC2 K20 354 | DC2 K20 355 | DC2 K20 356 | DC2 K20 357 | DC2 K20 358 | DC2 K20 359 | DC2 K20 360 | DC2 K20 361 | DC2 K20 362 | DC2 K20 363 | DC2 K20 364 | DC2 K20 365 | DC2 K20 366 | DC2 K20 367 | DC2 K20 368 | DC2 K20 369 | DC2 K20 370 | DC2 K20 371 | DC2 K20 372 | DC2 K20 373 | DC2 K20 374 | DC2 K20 375 | DC2 K20 376 | DC2 K20 377 | DC2 K20 378 | DC2 K20 379 | DC2 K20 380 | DC2 K20 381 | DC2 K20 382 | DC2 K20 383 | DC2 K20 384 | DC2 K20 385 | DC2 K20 386 | DC2 K20 387 | DC2 K20 388 | DC2 K20 389 | DC2 K20 390 | DC2 K20 391 | DC2 K20 392 | DC2 K20 393 | DC2 K20 394 | DC2 K20 395 | DC2 K20 396 | DC2 K20 397 | DC2 K20 398 | DC2 K20 399 | DC2 K20 400 | DC2 K20 401 | DC2 K20 402 | DC2 K20 403 | DC2 K20 404 | DC2 K20 405 | DC2 K20 406 | DC2 K20 407 | DC2 K20 408 | DC2 K20 409 | DC2 K20 410 | DC2 K20 411 | DC2 K20 412 | DC2 K20 413 | DC2 K20 414 | DC2 K20 415 | DC2 K20 416 | DC2 K20 417 | DC2 K20 418 | DC2 K20 419 | DC2 K20 420 | DC2 K20 421 | DC2 K20 422 | DC2 K20 423 | DC2 K20 424 | DC2 K20 425 | DC2 K20 426 | DC2 K20 427 | DC2 K20 428 | DC2 K20 429 | DC2 K20 430 | DC2 K20 431 | DC2 K20 432 | DC2 K20 433 | DC2 K20 434 | DC2 K20 435 | DC2 K20 436 | DC2 K20 437 | DC2 K20 438 | DC2 K20 439 | DC2 K20 440 | DC2 K20 441 | DC2 K20 442 | DC2 K20 443 | DC2 K20 444 | DC2 K20 445 | DC2 K20 446 | DC2 K20 447 | DC2 K20 448 | DC2 K20 449 | DC2 K20 450 | DC2 K20 451 | DC2 K20 452 | DC2 K20 453 | DC2 K20 454 | DC2 K20 455 | DC2 K20 456 | DC2 K20 457 | DC2 K20 458 | DC2 K20 459 | DC2 K20 460 | DC2 K20 461 | DC2 K20 462 | DC2 K20 463 | DC2 K20 464 | DC2 K20 465 | DC2 K20 466 | DC2 K20 467 | DC2 K20 468 | DC2 K20 469 | DC2 K20 470 | DC2 K20 471 | DC2 K20 472 | DC2 K20 473 | DC2 K20 474 | DC2 K20 475 | DC2 K20 476 | DC2 K20 477 | DC2 K20 478 | DC2 K20 479 | DC2 K20 480 | DC2 K20 481 | DC2 K20 482 | DC2 K20 483 | DC2 K20 484 | DC2 K20 485 | DC2 K20 486 | DC2 K20 487 | DC2 K20 488 | DC2 K20 489 | DC2 K20 490 | DC2 K20 491 | DC2 K20 492 | DC2 K20 493 | DC2 K20 494 | DC2 K20 495 | DC2 K20 496 | DC2 K20 497 | DC2 K20 498 | DC2 K20 499 | DC2 K20 500 | DC2 K20 501 | DC2 K20 502 | DC2 K20 503 | DC2 K20 504 | DC2 K20 505 | DC2 K20 506 | DC2 K20 507 | DC2 K20 508 | DC2 K20 509 | DC2 K20 510 | DC2 K20 511 | DC2 K20 512 | DC2 K20 513 | DC2 K20 514 | DC2 K20 515 | DC2 K20 516 | DC2 K20 517 | DC2 K20 518 | DC2 K20 519 | DC2 K20 520 | DC2 K20 521 | DC2 K20 522 | DC2 K20 523 | DC2 K20 524 | DC2 K20 525 | DC2 K20 526 | DC2 K20 527 | DC2 K20 528 | DC2 K20 529 | DC2 K20 530 | DC2 K20 531 | DC2 K20 532 | DC2 K20 533 | DC2 K20 534 | DC2 K20 535 | DC2 K20 536 | DC2 K20 537 | DC2 K20 538 | DC2 K20 539 | DC2 K20 540 | DC2 K20 541 | DC2 K20 542 | DC2 K20 543 | DC2 K20 544 | DC2 K20 545 | DC2 K20 546 | DC2 K20 547 | DC2 K20 548 | DC2 K20 549 | DC2 K20 550 | DC2 K20 551 | DC2 K20 552 | DC2 K20 553 | DC2 K20 554 | DC2 K20 555 | DC2 K20 556 | DC2 K20 557 | DC2 K20 558 | DC2 K20 559 | DC2 K20 560 | DC2 K20 561 | DC2 K20 562 | DC2 K20 563 | DC2 K20 564 | DC2 K20 565 | DC2 K20 566 | DC2 K20 567 | DC2 K20 568 | DC2 K20 569 | DC2 K20 570 | DC2 K20 571 | DC2 K20 572 | DC2 K20 573 | DC2 K20 574 | DC2 K20 575 | DC2 K20 576 | DC2 K20 577 | DC2 K20 578 | DC2 K20 579 | DC2 K20 580 | DC2 K20 581 | DC2 K20 582 | DC2 K20 583 | DC2 K20 584 | DC2 K20 585 | DC2 K20 586 | DC2 K20 587 | DC2 K20 588 | DC2 K20 589 | DC2 K20 590 | DC2 K20 591 | DC2 K20 592 | DC2 K20 593 | DC2 K20 594 | DC2 K20 595 | DC2 K20 596 | DC2 K20 597 | DC2 K20 598 | DC2 K20 599 | DC2 K20 600 | DC2 K20 601 | DC2 K20 602 | DC2 K20 603 | DC2 K20 604 | DC2 K20 605 | DC2 K20 606 | DC2 K20 607 | DC2 K20 608 | DC2 K20 609 | DC2 K20 610 | DC2 K20 611 | DC2 K20 612 | DC2 K20 613 | DC2 K20 614 | DC2 K20 615 | DC2 K20 616 | DC2 K20 617 | DC2 K20 618 | DC2 K20 619 | DC2 K20 620 | DC2 K20 621 | DC2 K20 622 | DC2 K20 623 | DC2 K20 624 | DC2 K20 625 | DC2 K20 626 | DC2 K20 627 | DC2 K20 628 | DC2 K20 629 | DC2 K20 630 | DC2 K20 631 | DC2 K20 632 | DC2 K20 633 | DC2 K20 634 | DC2 K20 635 | DC2 K20 636 | DC2 K20 637 | DC2 K20 638 | DC2 K20 639 | DC2 K20 640 | DC2 K20 641 | DC2 K20 642 | DC2 K20 643 | DC2 K20 644 | DC2 K20 645 | DC2 K20 646 | DC2 K20 647 | DC2 K20 648 | DC2 K20 649 | DC2 K20 650 | DC2 K20 651 | DC2 K20 652 | DC2 K20 653 | DC2 K20 654 | DC2 K20 655 | DC2 K20 656 | DC2 K20 657 | DC2 K20 658 | DC2 K20 659 | DC2 K20 660 | DC2 K20 661 | DC2 K20 662 | DC2 K20 663 | DC2 K20 664 | DC2 K20 665 | DC2 K20 666 | DC2 K20 667 | DC2 K20 668 | DC2 K20 669 | DC2 K20 670 | DC2 K20 671 | DC2 K20 672 | DC2 K20 673 | DC2 K20 674 | DC2 K20 675 | DC2 K20 676 | DC2 K20 677 | DC2 K20 678 | DC2 K20 679 | DC2 K20 680 | DC2 K20 681 | DC2 K20 682 | DC2 K20 683 | DC2 K20 684 | DC2 K20 685 | DC2 K20 686 | DC2 K20 687 | DC2 K20 688 | DC2 K20 689 | DC2 K20 690 | DC2 K20 691 | DC2 K20 692 | DC2 K20 693 | DC2 K20 694 | DC2 K20 695 | DC2 K20 696 | DC2 K20 697 | DC2 K20 698 | DC2 K20 699 | DC2 K20 700 | DC2 K20 701 | DC2 K20 702 | DC2 K20 703 | DC2 K20 704 | DC2 K20 705 | DC2 K20 706 | DC2 K20 707 | DC2 K20 708 | DC2 K20 709 | DC2 K20 710 | DC2 K20 711 | DC2 K20 712 | DC2 K20 713 | DC2 K20 714 | DC2 K20 715 | DC2 K20 716 | DC2 K20 717 | DC2 K20 718 | DC2 K20 719 | DC2 K20 720 | DC2 K20 721 | DC2 K20 722 | DC2 K20 723 | DC2 K20 724 | DC2 K20 725 | DC2 K20 726 | DC2 K20 727 | DC2 K20 728 | DC2 K20 729 | DC2 K20 730 | DC2 K20 731 | DC2 K20 732 | DC2 K20 733 | DC2 K20 734 | DC2 K20 735 | DC2 K20 736 | DC2 K20 737 | DC2 K20 738 | DC2 K20 739 | DC2 K20 740 | DC2 K20 741 | DC2 K20 742 | DC2 K20 743 | DC2 K20 744 | DC2 K20 745 | DC2 K20 746 | DC2 K20 747 | DC2 K20 748 | DC2 K20 749 | DC2 K20 750 | DC2 K20 751 | DC2 K20 752 | DC2 K20 753 | DC2 K20 754 | DC2 K20 755 | DC2 K20 756 | DC2 K20 757 | DC2 K20 758 | DC2 K20 759 | DC2 K20 760 | DC2 K20 761 | DC2 K20 762 | DC2 K20 763 | DC2 K20 764 | DC2 K20 765 | DC2 K20 766 | DC2 K20 767 | DC2 K20 768 | DC2 K20 769 | DC2 K20 770 | DC2 K20 771 | DC2 K20 772 | DC2 K20 773 | DC2 K20 774 | DC2 K20 775 | DC2 K20 776 | DC2 K20 777 | DC2 K20 778 | DC2 K20 779 | DC2 K20 780 | DC2 K20 781 | DC2 K20 782 | DC2 K20 783 | DC2 K20 784 | DC2 K20 785 | DC2 K20 786 | DC2 K20 787 | DC2 K20 788 | DC2 K20 789 | DC2 K20 790 | DC2 K20 791 | DC2 K20 792 | DC2 K20 793 | DC2 K20 794 | DC2 K20 795 | DC2 K20 796 | DC2 K20 797 | DC2 K20 798 | DC2 K20 799 | DC2 K20 800 | DC2 K20 801 | DC2 K20 802 | DC2 K20 803 | DC2 K20 804 | DC2 K20 805 | DC2 K20 806 | DC2 K20 807 | DC2 K20 808 | DC2 K20 809 | DC2 K20 810 | DC2 K20 811 | DC2 K20 812 | DC2 K20 813 | DC2 K20 814 | DC2 K20 815 | DC2 K20 816 | DC2 K20 817 | DC2 K20 818 | DC2 K20 819 | DC2 K20 820 | DC2 K20 821 | DC2 K20 822 | DC2 K20 823 | DC2 K20 824 | DC2 K20 825 | DC2 K20 826 | DC2 K20 827 | DC2 K20 828 | DC2 K20 829 | DC2 K20 830 | DC2 K20 831 | DC2 K20 832 | DC2 K20 833 | DC2 K20 834 | DC2 K20 835 | DC2 K20 836 | DC2 K20 837 | DC2 K20 838 | DC2 K20 839 | DC2 K20 840 | DC2 K20 841 | DC2 K20 842 | DC2 K20 843 | DC2 K20 844 | DC2 K20 845 | DC2 K20 846 | DC2 K20 847 | DC2 K20 848 | DC2 K20 849 | DC2 K20 850 | DC2 K20 851 | DC2 K20 852 | DC2 K20 853 | DC2 K20 854 | DC2 K20 855 | DC2 K20 856 | DC2 K20 857 | DC2 K20 858 | DC2 K20 859 | DC2 K20 860 | DC2 K20 861 | DC2 K20 862 | DC2 K20 863 | DC2 K20 864 | DC2 K20 865 | DC2 K20 866 | DC2 K20 867 | DC2 K20 868 | DC2 K20 869 | DC2 K20 870 | DC2 K20 871 | DC2 K20 872 | DC2 K20 873 | DC2 K20 874 | DC2 K20 875 | DC2 K20 876 | DC2 K20 877 | DC2 K20 878 | DC2 K20 879 | DC2 K20 880 | DC2 K20 881 | DC2 K2 |

|  |         |         | MCF-7   |         |         |         |         |         |         |         |         |         | MDA-MB-231 |         |         |         |         |         |         |         |         |         |         |         |         |         |         |         |         |         |         |         |         |         |         |         |         |         |         |         |         |         |         |         |         |         |         |         |         |         |         |         |         |         |         |         |         |         |         |         |         |         |         |         |         |         |         |         |         |         |         |         |         |         |         |         |         |         |         |         |         |         |         |         |         |         |         |         |         |         |         |         |         |         |         |         |         |         |         |         |         |         |         |          |          |          |          |          |          |          |          |          |          |          |          |          |          |          |          |          |          |          |          |          |          |          |          |          |          |          |          |          |          |          |          |          |          |          |          |          |          |          |          |          |          |          |          |          |          |          |          |          |          |          |          |          |          |          |          |          |          |          |          |          |          |          |          |          |          |          |          |          |          |          |          |          |          |          |          |          |          |          |          |          |          |          |          |          |          |          |          |          |          |          |          |          |          |          |          |          |          |          |          |          |          |          |          |          |          |          |          |          |          |          |          |          |          |          |          |          |          |          |          |          |          |          |          |          |          |          |          |          |          |          |          |          |          |          |          |          |          |          |          |          |          |          |          |          |          |          |          |          |          |          |          |          |          |          |          |          |          |          |          |          |          |          |          |          |          |          |          |          |          |          |          |          |          |          |          |          |          |          |          |          |          |          |          |          |          |          |          |          |          |          |          |          |          |          |          |          |          |          |          |          |          |          |          |          |          |          |          |          |          |          |          |          |          |          |          |          |          |          |          |          |          |          |          |          |          |          |          |          |          |          |          |          |          |          |          |          |          |          |          |          |          |          |          |      |
|--|---------|---------|---------|---------|---------|---------|---------|---------|---------|---------|---------|---------|------------|---------|---------|---------|---------|---------|---------|---------|---------|---------|---------|---------|---------|---------|---------|---------|---------|---------|---------|---------|---------|---------|---------|---------|---------|---------|---------|---------|---------|---------|---------|---------|---------|---------|---------|---------|---------|---------|---------|---------|---------|---------|---------|---------|---------|---------|---------|---------|---------|---------|---------|---------|---------|---------|---------|---------|---------|---------|---------|---------|---------|---------|---------|---------|---------|---------|---------|---------|---------|---------|---------|---------|---------|---------|---------|---------|---------|---------|---------|---------|---------|---------|---------|---------|---------|---------|---------|---------|---------|---------|---------|----------|----------|----------|----------|----------|----------|----------|----------|----------|----------|----------|----------|----------|----------|----------|----------|----------|----------|----------|----------|----------|----------|----------|----------|----------|----------|----------|----------|----------|----------|----------|----------|----------|----------|----------|----------|----------|----------|----------|----------|----------|----------|----------|----------|----------|----------|----------|----------|----------|----------|----------|----------|----------|----------|----------|----------|----------|----------|----------|----------|----------|----------|----------|----------|----------|----------|----------|----------|----------|----------|----------|----------|----------|----------|----------|----------|----------|----------|----------|----------|----------|----------|----------|----------|----------|----------|----------|----------|----------|----------|----------|----------|----------|----------|----------|----------|----------|----------|----------|----------|----------|----------|----------|----------|----------|----------|----------|----------|----------|----------|----------|----------|----------|----------|----------|----------|----------|----------|----------|----------|----------|----------|----------|----------|----------|----------|----------|----------|----------|----------|----------|----------|----------|----------|----------|----------|----------|----------|----------|----------|----------|----------|----------|----------|----------|----------|----------|----------|----------|----------|----------|----------|----------|----------|----------|----------|----------|----------|----------|----------|----------|----------|----------|----------|----------|----------|----------|----------|----------|----------|----------|----------|----------|----------|----------|----------|----------|----------|----------|----------|----------|----------|----------|----------|----------|----------|----------|----------|----------|----------|----------|----------|----------|----------|----------|----------|----------|----------|----------|----------|----------|----------|----------|----------|----------|----------|----------|----------|----------|----------|----------|----------|----------|----------|----------|----------|----------|----------|----------|----------|----------|----------|----------|----------|----------|----------|----------|----------|----------|----------|----------|----------|----------|----------|----------|----------|----------|----------|----------|----------|----------|----------|----------|----------|------|
|  | UniProt | control | control | control | IC20 01 | IC20 02 | IC20 03 | IC20 04 | IC20 05 | IC20 06 | IC20 07 | IC20 08 | IC20 09    | IC20 10 | IC20 11 | IC20 12 | IC20 13 | IC20 14 | IC20 15 | IC20 16 | IC20 17 | IC20 18 | IC20 19 | IC20 20 | IC20 21 | IC20 22 | IC20 23 | IC20 24 | IC20 25 | IC20 26 | IC20 27 | IC20 28 | IC20 29 | IC20 30 | IC20 31 | IC20 32 | IC20 33 | IC20 34 | IC20 35 | IC20 36 | IC20 37 | IC20 38 | IC20 39 | IC20 40 | IC20 41 | IC20 42 | IC20 43 | IC20 44 | IC20 45 | IC20 46 | IC20 47 | IC20 48 | IC20 49 | IC20 50 | IC20 51 | IC20 52 | IC20 53 | IC20 54 | IC20 55 | IC20 56 | IC20 57 | IC20 58 | IC20 59 | IC20 60 | IC20 61 | IC20 62 | IC20 63 | IC20 64 | IC20 65 | IC20 66 | IC20 67 | IC20 68 | IC20 69 | IC20 70 | IC20 71 | IC20 72 | IC20 73 | IC20 74 | IC20 75 | IC20 76 | IC20 77 | IC20 78 | IC20 79 | IC20 80 | IC20 81 | IC20 82 | IC20 83 | IC20 84 | IC20 85 | IC20 86 | IC20 87 | IC20 88 | IC20 89 | IC20 90 | IC20 91 | IC20 92 | IC20 93 | IC20 94 | IC20 95 | IC20 96 | IC20 97 | IC20 98 | IC20 99 | IC20 100 | IC20 101 | IC20 102 | IC20 103 | IC20 104 | IC20 105 | IC20 106 | IC20 107 | IC20 108 | IC20 109 | IC20 110 | IC20 111 | IC20 112 | IC20 113 | IC20 114 | IC20 115 | IC20 116 | IC20 117 | IC20 118 | IC20 119 | IC20 120 | IC20 121 | IC20 122 | IC20 123 | IC20 124 | IC20 125 | IC20 126 | IC20 127 | IC20 128 | IC20 129 | IC20 130 | IC20 131 | IC20 132 | IC20 133 | IC20 134 | IC20 135 | IC20 136 | IC20 137 | IC20 138 | IC20 139 | IC20 140 | IC20 141 | IC20 142 | IC20 143 | IC20 144 | IC20 145 | IC20 146 | IC20 147 | IC20 148 | IC20 149 | IC20 150 | IC20 151 | IC20 152 | IC20 153 | IC20 154 | IC20 155 | IC20 156 | IC20 157 | IC20 158 | IC20 159 | IC20 160 | IC20 161 | IC20 162 | IC20 163 | IC20 164 | IC20 165 | IC20 166 | IC20 167 | IC20 168 | IC20 169 | IC20 170 | IC20 171 | IC20 172 | IC20 173 | IC20 174 | IC20 175 | IC20 176 | IC20 177 | IC20 178 | IC20 179 | IC20 180 | IC20 181 | IC20 182 | IC20 183 | IC20 184 | IC20 185 | IC20 186 | IC20 187 | IC20 188 | IC20 189 | IC20 190 | IC20 191 | IC20 192 | IC20 193 | IC20 194 | IC20 195 | IC20 196 | IC20 197 | IC20 198 | IC20 199 | IC20 200 | IC20 201 | IC20 202 | IC20 203 | IC20 204 | IC20 205 | IC20 206 | IC20 207 | IC20 208 | IC20 209 | IC20 210 | IC20 211 | IC20 212 | IC20 213 | IC20 214 | IC20 215 | IC20 216 | IC20 217 | IC20 218 | IC20 219 | IC20 220 | IC20 221 | IC20 222 | IC20 223 | IC20 224 | IC20 225 | IC20 226 | IC20 227 | IC20 228 | IC20 229 | IC20 230 | IC20 231 | IC20 232 | IC20 233 | IC20 234 | IC20 235 | IC20 236 | IC20 237 | IC20 238 | IC20 239 | IC20 240 | IC20 241 | IC20 242 | IC20 243 | IC20 244 | IC20 245 | IC20 246 | IC20 247 | IC20 248 | IC20 249 | IC20 250 | IC20 251 | IC20 252 | IC20 253 | IC20 254 | IC20 255 | IC20 256 | IC20 257 | IC20 258 | IC20 259 | IC20 260 | IC20 261 | IC20 262 | IC20 263 | IC20 264 | IC20 265 | IC20 266 | IC20 267 | IC20 268 | IC20 269 | IC20 270 | IC20 271 | IC20 272 | IC20 273 | IC20 274 | IC20 275 | IC20 276 | IC20 277 | IC20 278 | IC20 279 | IC20 280 | IC20 281 | IC20 282 | IC20 283 | IC20 284 | IC20 285 | IC20 286 | IC20 287 | IC20 288 | IC20 289 | IC20 290 | IC20 291 | IC20 292 | IC20 293 | IC20 294 | IC20 295 | IC20 296 | IC20 297 | IC20 298 | IC20 299 | IC20 300 | IC20 301 | IC20 302 | IC20 303 | IC20 304 | IC20 305 | IC20 306 | IC20 307 | IC20 308 | IC20 309 | IC20 310 | IC20 311 | IC20 312 | IC20 313 | IC20 314 | IC20 315 | IC20 316 | IC20 317 | IC20 318 | IC20 319 | IC20 320 | IC20 321 | IC20 322 | IC20 323 | IC20 324 | IC20 325 | IC20 326 | IC20 327 | IC20 328 | IC20 329 | IC20 330 | IC20 331 | IC20 332 | IC20 333 | IC20 334 | IC20 335 | IC20 336 | IC20 337 | IC20 338 | IC20 339 | IC20 340 | IC20 341 | IC20 342 | IC20 343 | IC20 |
