# Supplementary material for: From Proteomics to Personalized Medicine: The Importance of Isoflavone Dose and Estrogen Receptor Status in Breast Cancer Cells
Source: MDPI journal article supplement (doi:10.3390/jpm10040292), 2020-12-19
Supplement: s1 [file s1]

Supplementary Table S2. Overview on all relatively quantified 5180 proteins statistical analysis

| Protein name                                                  | UniProt | MCF-7               |            |                     |         | MDA-MB-231          |        |                     |            |
|---------------------------------------------------------------|---------|---------------------|------------|---------------------|---------|---------------------|--------|---------------------|------------|
|                                                               |         | Dai SC20 vs control |            | Gen SC20 vs control |         | Dai IC20 vs control |        | Gen IC20 vs control |            |
|                                                               |         | p value             | BH q value | log2FC              | p value | BH q value          | log2FC | p value             | BH q value |
| 152 40S ribosomal protein S6                                  | P62753  | 0.0521              | 0.1479     | 0.11                | 0.3417  | 0.6999              | 0.14   | 0.0025              | 0.0273     |
| 153 40S ribosomal protein S7                                  | P62081  | 0.0047              | 0.0436     | 0.26                | 0.2885  | 0.6598              | 0.25   | 0.0023              | 0.0266     |
| 154 40S ribosomal protein S8                                  | P62241  | 0.0109              | 0.0602     | 0.23                | 0.2954  | 0.6714              | 0.20   | 0.0055              | 0.0359     |
| 155 40S ribosomal protein S9                                  | P46781  | 0.0307              | 0.1081     | 0.25                | 0.4552  | 0.7878              | 0.15   | 0.0163              | 0.0604     |
| 156 40S ribosomal protein SA                                  | P08865  | 0.0041              | 0.0408     | 0.19                | 0.5178  | 0.8395              | 0.09   | 0.0105              | 0.0477     |
| 157 45 kDa calcium-binding protein                            | Q9BRK5  | 0.0008              | 0.0218     | -0.28               | 0.5098  | 0.8320              | 0.11   | 0.5387              | 0.5555     |
| 158 4-aminobutyrate aminotransferase mitochondrial            | P08404  | 0.0070              | 0.0499     | 0.17                | 0.7109  | 0.6308              | 0.16   | 0.0055              | 0.0361     |
| 159 4f2 cell-surface antigen heavy chain                      | P08195  | 0.0003              | 0.0173     | 0.69                | 0.1600  | 0.6641              | 0.35   | 0.0002              | 0.0182     |
| 160 4-trimethylaminobutylaldehyde dehydrogenase               | P49189  | 0.0000              | 0.0000     | 0.28                | 0.4154  | 0.4498              | 0.15   | 0.0107              | 0.0483     |
| 161 5'-3' exoribonuclease 1                                   | Q81ZH2  | 0.2544              | 0.4421     | -0.06               | 0.7656  | 0.8304              | 0.05   | 0.3238              | 0.5115     |
| 162 5'-3' exoribonuclease 2                                   | Q9H0D6  | 0.0946              | 0.2168     | -0.10               | 0.6066  | 0.7088              | 0.09   | 0.0019              | 0.0240     |
| 163 5'-AMP-activated protein kinase catalytic subunit alpha-1 | Q13131  | 0.4108              | 0.6303     | -3.31               | 0.5752  | 0.8820              | -1.75  | 0.5661              | 0.7870     |
| 164 5'-AMP-activated protein kinase subunit beta-1            | Q9Y478  | 0.0637              | 0.1672     | -0.13               | 0.3574  | 0.7088              | 0.13   | 0.0064              | 0.0385     |
| 165 5'-AMP-activated protein kinase subunit beta-2            | Q43741  | 0.4108              | 0.6301     | -3.31               | 0.5752  | 0.8818              | -1.75  | 0.5661              | 0.7868     |
| 166 5'-AMP-activated protein kinase subunit gamma-1           | P54619  | 0.4108              | 0.6299     | -3.31               | 0.5752  | 0.8815              | -1.75  | 0.5661              | 0.7866     |
| 167 5-methylcytosine rRNA methyltransferase NSUN4             | Q96CB9  | 0.1760              | 0.3382     | 0.07                | 0.5401  | 0.8556              | 0.07   | 0.8106              | 0.8466     |
| 168 5-nucleotidase domain-containing protein 1                | Q5TFE4  | 0.1086              | 0.2381     | -0.15               | 0.5854  | 0.6915              | -0.05  | 0.0157              | 0.0590     |
| 169 5-nucleotidase domain-containing protein 3                | Q86UY8  | 0.1578              | 0.3120     | -0.25               | 0.6676  | 0.8308              | -0.05  | 0.1233              | 0.2416     |
| 170 60 kDa heat shock protein mitochondrial                   | P10809  | 0.0001              | 0.0167     | 0.38                | 0.1033  | 0.6340              | 0.33   | 0.0001              | 0.0179     |
| 171 60 kDa SS-A/Ro ribonucleoprotein                          | P10155  | 0.0398              | 0.1259     | 0.26                | 0.2729  | 0.6652              | 0.09   | 0.8840              | 0.9078     |
| 172 60S acidic ribosomal protein P0                           | P05388  | 0.0003              | 0.0171     | 0.39                | 0.2470  | 0.6588              | 0.21   | 0.0034              | 0.0310     |
| 173 60S acidic ribosomal protein P0-like                      | Q8NHWS  | 0.1295              | 0.2706     | -0.26               | 0.3547  | 0.7064              | -0.21  | 0.3085              | 0.4926     |
| 174 60S acidic ribosomal protein P1                           | P05386  | 0.3330              | 0.5399     | -3.31               | 0.3843  | 0.7303              | 0.06   | 0.0074              | 0.0406     |
| 175 60S acidic ribosomal protein P2                           | P05387  | 0.0153              | 0.0717     | 0.28                | 0.2581  | 0.6628              | 0.20   | 0.0037              | 0.0316     |
| 176 60S ribosomal export protein NMD3                         | Q96D46  | 0.0671              | 0.1718     | -0.07               | 0.5574  | 0.8713              | -0.09  | 0.0005              | 0.0184     |
| 177 60S ribosomal protein L10                                 | P27635  | 0.0328              | 0.1130     | 0.12                | 0.0225  | 0.4757              | 0.15   | 0.0009              | 0.0221     |
| 178 60S ribosomal protein L10a                                | P29006  | 0.0460              | 0.1371     | 0.19                | 0.6471  | 0.7390              | 0.09   | 0.0371              | 0.1010     |
| 179 60S ribosomal protein L10-like                            | Q96L21  | 0.1820              | 0.3457     | -0.57               | 0.1404  | 0.6528              | -0.52  | 0.1255              | 0.2449     |
| 180 60S ribosomal protein L11                                 | P29213  | 0.0920              | 0.2130     | 0.19                | 0.2570  | 0.6640              | 0.19   | 0.0047              | 0.0334     |
| 181 60S ribosomal protein L12                                 | P30050  | 0.0011              | 0.0234     | 0.36                | 0.0194  | 0.4652              | -0.15  | 0.8532              | 0.8829     |
| 182 60S ribosomal protein L13                                 | P26373  | 0.2089              | 0.3817     | 0.10                | 0.3808  | 0.7273              | 0.17   | 0.0208              | 0.0697     |
| 183 60S ribosomal protein L13a                                | P40429  | 0.0652              | 0.1690     | 0.13                | 0.3986  | 0.7427              | 0.19   | 0.0196              | 0.0674     |
| 184 60S ribosomal protein L14                                 | P50914  | 0.0086              | 0.0551     | 0.25                | 0.4098  | 0.7506              | 0.15   | 0.0078              | 0.0415     |
| 185 60S ribosomal protein L15                                 | P61313  | 0.0787              | 0.1922     | 0.14                | 0.3164  | 0.6803              | 0.21   | 0.0096              | 0.0456     |
| 186 60S ribosomal protein L17                                 | P18621  | 0.0350              | 0.1170     | 0.14                | 0.3626  | 0.7107              | 0.18   | 0.0062              | 0.0381     |
| 187 60S ribosomal protein L18                                 | Q70720  | 0.0371              | 0.1212     | 0.21                | 0.5461  | 0.8614              | 0.11   | 0.0202              | 0.0683     |
| 188 60S ribosomal protein L18a                                | Q02543  | 0.0148              | 0.0708     | 0.33                | 0.1890  | 0.6696              | 0.26   | 0.0122              | 0.0516     |
| 189 60S ribosomal protein L19                                 | P04808  | 0.0546              | 0.1529     | 0.15                | 0.2164  | 0.6602              | 0.26   | 0.0063              | 0.0384     |
| 190 60S ribosomal protein L21                                 | P46778  | 0.5610              | 0.6298     | 0.03                | 0.4056  | 0.7485              | 0.13   | 0.0398              | 0.1062     |
| 191 60S ribosomal protein L22                                 | P35268  | 0.0267              | 0.0990     | 0.18                | 0.2687  | 0.6634              | 0.20   | 0.0005              | 0.0188     |
| 192 60S ribosomal protein L22-like 1                          | Q6P5R6  | 0.0071              | 0.0498     | 0.22                | 0.3304  | 0.6893              | 0.14   | 0.0109              | 0.0483     |
| 193 60S ribosomal protein L23                                 | P62829  | 0.0325              | 0.1123     | 0.22                | 0.2645  | 0.6641              | 0.19   | 0.0107              | 0.0482     |
| 194 60S ribosomal protein L23a                                | P62750  | 0.0163              | 0.0745     | 0.31                | 0.2469  | 0.6599              | 0.24   | 0.0054              | 0.0358     |
| 195 60S ribosomal protein L24                                 | P83731  | 0.0130              | 0.0667     | 0.16                | 0.6864  | 0.7708              | -0.07  | 0.4464              | 0.6595     |
| 196 60S ribosomal protein L26                                 | P61254  | 0.0217              | 0.0878     | 0.22                | 0.3217  | 0.6838              | 0.22   | 0.0075              | 0.0410     |
| 197 60S ribosomal protein L27                                 | P61353  | 0.0226              | 0.0896     | 0.15                | 0.4695  | 0.7992              | 0.12   | 0.0144              | 0.0564     |
| 198 60S ribosomal protein L27a                                | P46776  | 0.0353              | 0.1174     | 0.21                | 0.4714  | 0.8006              | 0.12   | 0.0273              | 0.0829     |
| 199 60S ribosomal protein L28                                 | P46779  | 0.0256              | 0.0969     | 0.26                | 0.2107  | 0.6623              | 0.31   | 0.0045              | 0.0331     |
| 200 60S ribosomal protein L29                                 | P47914  | 0.5218              | 0.5935     | -0.03               | 0.6177  | 0.7171              | 0.09   | 0.0120              | 0.0512     |
| 201 60S ribosomal protein L3                                  | P39023  | 0.0071              | 0.0498     | 0.21                | 0.3257  | 0.6855              | 0.22   | 0.0006              | 0.0190     |
| 202 60S ribosomal protein L30                                 | P62888  | 0.0047              | 0.0435     | 0.42                | 0.1467  | 0.6562              | 0.25   | 0.0097              | 0.0460     |
| 203 60S ribosomal protein L31                                 | P62899  | 0.0119              | 0.0630     | 0.19                | 0.2428  | 0.6595              | 0.26   | 0.0107              | 0.0483     |
| 204 60S ribosomal protein L32                                 | P62910  | 0.9371              | 0.9524     | 0.00                | 0.8314  | 0.8785              | 0.02   | 0.0005              | 0.0182     |
| 205 60S ribosomal protein L34                                 | P49207  | 0.0089              | 0.0562     | -1.28               | 0.2124  | 0.6628              | -0.63  | 0.3404              | 0.5329     |
| 206 60S ribosomal protein L35                                 | P42766  | 0.3806              | 0.5965     | -0.05               | 0.8110  | 0.8642              | 0.02   | 0.0219              | 0.0721     |
| 207 60S ribosomal protein L35a                                | P18077  | 0.0435              | 0.1324     | 0.23                | 0.2613  | 0.6645              | 0.22   | 0.0132              | 0.0537     |
| 208 60S ribosomal protein L36                                 | Q9Y3U8  | 0.0004              | 0.0180     | 0.46                | 0.6559  | 0.7464              | 0.07   | 0.0820              | 0.1760     |
| 209 60S ribosomal protein L36a-like                           | Q969Q0  | 0.0103              | 0.0592     | 0.21                | 0.2782  | 0.6650              | 0.28   | 0.0020              | 0.0249     |
| 210 60S ribosomal protein L37                                 | P61927  | 0.4288              | 0.5063     | 0.08                | 0.2502  | 0.6602              | 0.16   | 0.0017              | 0.0234     |
| 211 60S ribosomal protein L37a                                | P61513  | 0.0454              | 0.1361     | 0.20                | 0.2911  | 0.6693              | 0.12   | 0.0651              | 0.1490     |
| 212 60S ribosomal protein L38                                 | P63173  | 0.0206              | 0.0848     | 0.18                | 0.2669  | 0.6426              | -0.18  | 0.3057              | 0.4889     |
| 213 60S ribosomal protein L39                                 | P62891  | 0.0030              | 0.0371     | -0.17               | 0.0423  | 0.5677              | -0.40  | 0.4255              | 0.6352     |
| 214 60S ribosomal protein L3-like                             | Q92901  | 0.0041              | 0.0407     | -0.24               | 0.1272  | 0.6428              | 0.33   | 0.0070              | 0.0401     |
| 215 60S ribosomal protein L4                                  | P36578  | 0.1110              | 0.2421     | 0.12                | 0.5645  | 0.8781              | 0.09   | 0.0188              | 0.0655     |
| 216 60S ribosomal protein L5                                  | P46777  | 0.0601              | 0.1621     | 0.18                | 0.2204  | 0.6595              | 0.21   | 0.0056              | 0.0363     |
| 217 60S ribosomal protein L6                                  | Q02878  | 0.0315              | 0.1100     | 0.18                | 0.4753  | 0.8025              | 0.18   | 0.0039              | 0.0315     |
| 218 60S ribosomal protein L7                                  | P18124  | 0.0463              | 0.1376     | 0.21                | 0.2919  | 0.6693              | 0.25   | 0.0072              | 0.0401     |
| 219 60S ribosomal protein L7a                                 | P62424  | 0.0299              | 0.1061     | 0.17                | 0.3696  | 0.7179              | 0.21   | 0.0055              | 0.0358     |
| 220 60S ribosomal protein L8                                  | P62917  | 0.2593              | 0.4482     | 0.09                | 0.2577  | 0.6715              | 0.25   | 0.0354              | 0.0981     |
| 221 60S ribosomal protein L9                                  | P32969  | 0.0009              | 0.0225     | 0.20                | 0.4963  | 0.8187              | 0.05   | 0.5494              | 0.7235     |
| 222 6-phosphofructo-2-kinase/fructose-2, 6-bisphosphatase 1   | P16118  | 0.4108              | 0.6298     | -3.31               | 0.5752  | 0.8813              | -1.75  | 0.5661              | 0.7864     |
| 223 6-phosphofructo-2-kinase/fructose-2, 6-bisphosphatase 2   | P06825  | 0.0166              | 0.0754     | 0.69                | 0.0604  | 0.5926              | 0.38   | 0.0649              | 0.1488     |
| 224 6-phosphofructo-2-kinase/fructose-2, 6-bisphosphatase 3   | Q16875  | 0.3850              | 0.6018     | 0.04                | 0.7571  | 0.8239              | 0.04   | 0.5805              | 0.6377     |
| 225 6-phosphofructo-2-kinase/fructose-2, 6-bisphosphatase 4   | Q16877  | 0.1038              | 0.2305     | 0.45                | 0.8339  | 0.8805              | 0.11   | 0.0524              | 0.1294     |
| 226 6-phosphogluconate dehydrogenase decarboxylating          | P52209  | 0.0056              | 0.0455     | 0.55                | 0.2096  | 0.6616              | 0.28   | 0.0059              | 0.0373     |
| 227 6-phosphogluconolactonase                                 | P09536  | 0.0051              | 0.0440     | 0.05                | 0.6929  | 0.7240              | 0.02   | 0.0896              | 0.1877     |
| 228 7, 8-dihydro-8-oxoguanine triphosphatase                  | P36639  | 0.8853              | 0.9099     | 0.00                | 0.4553  | 0.7877              | 0.10   | 0.0167              | 0.0612     |
| 229 7-dehydrocholesterol reductase                            | Q9UBM7  | 0.0283              | 0.1023     | 0.16                | 0.5689  | 0.8828              | 0.09   | 0.0624              | 0.1453     |
| 230 7SK snRNA methylphosphate capping enzyme                  | Q7L210  | 0.1009              | 0.2265     | 0.09                | 0.4399  | 0.7759              | 0.07   | 0.0100              | 0.0466     |

Supplementary Table S2. Overview on all relatively quantified 5180 proteins statistical analysis

|     | Protein name                                                      | UniProt | MCF-7               |            |                     |         | MDA-MB-231          |        |                     |            |
|-----|-------------------------------------------------------------------|---------|---------------------|------------|---------------------|---------|---------------------|--------|---------------------|------------|
|     |                                                                   |         | Dai SC20 vs control |            | Gen SC20 vs control |         | SSE SC20 vs control |        | Dai IC20 vs control |            |
|     |                                                                   |         | p value             | BH q value | log2FC              | p value | BH q value          | log2FC | p value             | BH q value |
| 231 | A disintegrin and metalloproteinase with thrombospondin motifs 12 | P58397  | 0.4108              | 0.6296     | -3.31               | 0.5752  | 0.8810              | -1.75  | 0.5661              | 0.7862     |
| 232 | A disintegrin and metalloproteinase with thrombospondin motifs 17 | Q8TE56  | 0.0260              | 0.0976     | -0.11               | 0.5746  | 0.8861              | -0.06  | 0.0431              | 0.1128     |
| 233 | A disintegrin and metalloproteinase with thrombospondin motifs 19 | Q8TE59  | 0.0039              | 0.0398     | 0.41                | 0.1872  | 0.6665              | 0.26   | 0.0031              | 0.0302     |
| 234 | ABI gene family member 3                                          | Q9P2A4  | 0.6937              | 0.7483     | -0.07               | 0.3086  | 0.6782              | -0.36  | 0.9219              | 0.9388     |
| 235 | Abi interactor 1                                                  | Q8IZP0  | 0.7642              | 0.8080     | 0.03                | 0.7133  | 0.7900              | 0.06   | 0.5727              | 0.6304     |
| 236 | Abi interactor 2                                                  | Q9NYB9  | 0.4108              | 0.6294     | -3.31               | 0.5752  | 0.8807              | -1.75  | 0.5661              | 0.7860     |
| 237 | Abnormal spindle-like microcephaly-associated protein             | Q8IZT6  | 0.0310              | 0.1088     | 0.17                | 0.0490  | 0.5743              | 0.35   | 0.0055              | 0.0362     |
| 238 | Acetoacetyl-CoA synthetase                                        | Q86V21  | 0.4011              | 0.6209     | -0.04               | 0.4489  | 0.7837              | 0.14   | 0.1321              | 0.2540     |
| 239 | Acetolactate synthase-like protein                                | A1L0T0  | 0.1073              | 0.2359     | -0.22               | 0.9365  | 0.9570              | 0.01   | 0.0273              | 0.0828     |
| 240 | Acetyl-CoA acetyltransferase cytosolic                            | Q9BWD1  | 0.3851              | 0.6016     | -0.17               | 0.4866  | 0.8100              | -0.26  | 0.0265              | 0.0815     |
| 241 | Acetyl-CoA acetyltransferase mitochondrial                        | P24752  | 0.4465              | 0.5239     | 0.02                | 0.9156  | 0.9416              | -0.01  | 0.0003              | 0.0192     |
| 242 | Acetyl-CoA carboxylase 1                                          | I13085  | 0.0253              | 0.0962     | 0.07                | 0.0856  | 0.6210              | 0.21   | 0.0059              | 0.0374     |
| 243 | Acetyl-CoA carboxylase 2                                          | O00763  | 0.2165              | 0.3916     | -0.19               | 0.2014  | 0.6603              | -0.27  | 0.9372              | 0.9517     |
| 244 | Acidic fibroblast growth factor intracellular-binding protein     | O43427  | 0.7436              | 0.7917     | -0.01               | 0.8279  | 0.8761              | 0.02   | 0.8382              | 0.8694     |
| 245 | Acidic leucine-rich nuclear phosphoprotein 32 family member A     | P39687  | 0.0038              | 0.0396     | 0.33                | 0.1105  | 0.6332              | 0.30   | 0.0038              | 0.0319     |
| 246 | Acidic leucine-rich nuclear phosphoprotein 32 family member B     | Q92688  | 0.0990              | 0.2237     | 0.24                | 0.6598  | 0.7490              | -0.15  | 0.0042              | 0.0320     |
| 247 | Acidic leucine-rich nuclear phosphoprotein 32 family member C     | O43423  | 0.1633              | 0.3201     | 0.50                | 0.1048  | 0.6320              | 0.64   | 0.1370              | 0.2606     |
| 248 | Acidic leucine-rich nuclear phosphoprotein 32 family member D     | O95626  | 0.5163              | 0.5887     | -0.17               | 0.6526  | 0.7436              | -0.19  | 0.2709              | 0.4441     |
| 249 | Acidic leucine-rich nuclear phosphoprotein 32 family member E     | Q9BT10  | 0.0061              | 0.0471     | -0.22               | 0.0142  | 0.4540              | -0.34  | 0.0063              | 0.0387     |
| 250 | Acid-sensing ion channel 1                                        | P78348  | 0.9800              | 0.9861     | 0.00                | 0.4641  | 0.7958              | -0.43  | 0.6335              | 0.6867     |
| 251 | Aconitate hydratase mitochondrial                                 | Q99798  | 0.0756              | 0.1874     | 0.12                | 0.2950  | 0.6717              | 0.20   | 0.0160              | 0.0598     |
| 252 | Aconitase-binding protein                                         | Q8NEB7  | 0.5829              | 0.6503     | -0.03               | 0.2151  | 0.6613              | -0.09  | 0.3776              | 0.5768     |
| 253 | Actin alpha skeletal muscle                                       | P68133  | 0.0063              | 0.0480     | 0.15                | 0.6255  | 0.7229              | -0.04  | 0.0004              | 0.0180     |
| 254 | Actin aortic smooth muscle                                        | P62736  | 0.0721              | 0.1806     | -0.59               | 0.8488  | 0.8913              | 0.03   | 0.0059              | 0.0370     |
| 255 | Actin cytoplasmic 1                                               | P60709  | 0.0095              | 0.0576     | 0.34                | 0.2653  | 0.6633              | 0.24   | 0.0013              | 0.0224     |
| 256 | Actin cytoplasmic 2                                               | P63261  | 0.0050              | 0.0438     | 0.25                | 0.3748  | 0.7223              | -0.18  | 0.4417              | 0.6535     |
| 257 | Actin gamma-enteric smooth muscle                                 | P63267  | 0.1594              | 0.3143     | -0.32               | 0.4824  | 0.8071              | 0.13   | 0.0325              | 0.0927     |
| 258 | Actin-binding LIM protein 3                                       | O94929  | 0.4108              | 0.6292     | -3.31               | 0.5752  | 0.8805              | -1.75  | 0.5661              | 0.7857     |
| 259 | Actin-histidine N-methyltransferase                               | Q86T17  | 0.0740              | 0.1845     | 0.15                | 0.0578  | 0.5871              | 0.27   | 0.0089              | 0.0442     |
| 260 | Actin-like protein 6A                                             | O96019  | 0.9839              | 0.9885     | 0.00                | 0.0105  | 0.4422              | -0.31  | 0.0315              | 0.0908     |
| 261 | Actin-like protein 7A                                             | Q9Y615  | 0.7483              | 0.7950     | 0.10                | 0.5931  | 0.6976              | 0.14   | 0.6145              | 0.6690     |
| 262 | Actin-like protein 7B                                             | Q9Y614  | 0.0096              | 0.0577     | 0.36                | 0.0395  | 0.5637              | 0.42   | 0.5661              | 0.7906     |
| 263 | Actin-related protein 2                                           | P61160  | 0.0001              | 0.0162     | 0.18                | 0.6929  | 0.7745              | 0.03   | 0.4831              | 0.7029     |
| 264 | Actin-related protein 2/3 complex subunit 1A                      | Q92747  | 0.4108              | 0.6290     | -3.31               | 0.5752  | 0.8802              | -1.75  | 0.5661              | 0.7855     |
| 265 | Actin-related protein 2/3 complex subunit 1B                      | O15143  | 0.1941              | 0.3618     | -0.07               | 0.7620  | 0.8278              | 0.05   | 0.2329              | 0.3934     |
| 266 | Actin-related protein 2/3 complex subunit 2                       | O15144  | 0.0205              | 0.3737     | 0.05                | 0.2047  | 0.6590              | 0.28   | 0.0063              | 0.0385     |
| 267 | Actin-related protein 2/3 complex subunit 3                       | O15145  | 0.1016              | 0.2276     | -0.11               | 0.9508  | 0.9672              | 0.00   | 0.0235              | 0.0753     |
| 268 | Actin-related protein 2/3 complex subunit 4                       | P59998  | 0.2703              | 0.4627     | 0.08                | 0.4888  | 0.8121              | -0.10  | 0.0340              | 0.0956     |
| 269 | Actin-related protein 2/3 complex subunit 5                       | O15511  | 0.0166              | 0.0754     | 0.27                | 0.8265  | 0.8752              | -0.01  | 0.0300              | 0.0879     |
| 270 | Actin-related protein 2/3 complex subunit 5-like protein          | Q9BXP5  | 0.0021              | 0.0320     | -0.16               | 0.7927  | 0.8082              | 0.01   | 0.1838              | 0.3285     |
| 271 | Actin-related protein 3                                           | P61158  | 0.2427              | 0.4281     | 0.04                | 0.0082  | 0.4084              | 0.15   | 0.0023              | 0.0271     |
| 272 | Actin-related protein 3B                                          | Q9P1U1  | 0.0984              | 0.2227     | -0.12               | 0.0861  | 0.6186              | -0.33  | 0.0013              | 0.0234     |
| 273 | Actin-related protein 8                                           | Q9H981  | 0.4108              | 0.6288     | -3.31               | 0.5752  | 0.8800              | -1.75  | 0.5661              | 0.7853     |
| 274 | Activated RNA polymerase II transcriptional coactivator p15       | P53999  | 0.3764              | 0.5917     | 0.03                | 0.5975  | 0.7012              | 0.08   | 0.0294              | 0.0870     |
| 275 | Activating signal cointegrator 1                                  | Q15650  | 0.4108              | 0.6286     | -3.31               | 0.5752  | 0.8797              | -1.75  | 0.5661              | 0.7851     |
| 276 | Activating signal cointegrator 1 complex subunit 3                | Q8N3C0  | 0.4108              | 0.6285     | -3.31               | 0.5752  | 0.8794              | -1.75  | 0.5661              | 0.7849     |
| 277 | Activator of 90 kDa heat shock protein ATPase homolog 1           | O95433  | 0.0086              | 0.0551     | 0.18                | 0.1454  | 0.6566              | 0.26   | 0.0030              | 0.0301     |
| 278 | Active breakpoint cluster region-related protein                  | Q12979  | 0.4108              | 0.6283     | -3.31               | 0.5752  | 0.8792              | -1.75  | 0.5661              | 0.7847     |
| 279 | Actin receptor type-2B                                            | O13795  | 0.4108              | 0.6281     | -3.31               | 0.5752  | 0.8799              | -1.75  | 0.5661              | 0.7845     |
| 280 | Activity-dependent neuroprotector homeobox protein 2              | Q6Q332  | 0.5770              | 0.6446     | 0.10                | 0.0949  | 0.6310              | -0.38  | 0.5097              | 0.7312     |
| 281 | Acyl carrier protein mitochondrial                                | O14561  | 0.2328              | 0.4147     | -0.09               | 0.4074  | 0.7502              | -0.06  | 0.0471              | 0.1203     |
| 282 | Acyl carnitine-coA-releasing enzyme                               | P13798  | 0.0081              | 0.0534     | 0.23                | 0.0517  | 0.5759              | 0.21   | 0.0033              | 0.0310     |
| 283 | Acyl-CoA dehydrogenase family member 9 mitochondrial              | Q9H845  | 0.1852              | 0.3500     | 0.09                | 0.4037  | 0.7476              | -0.15  | 0.5140              | 0.7347     |
| 284 | Acyl-CoA desaturase                                               | O00767  | 0.0002              | 0.0170     | 0.30                | 0.2170  | 0.6597              | 0.08   | 0.0035              | 0.0313     |
| 285 | Acyl-CoA synthetase family member 2 mitochondrial                 | Q96CM8  | 0.4882              | 0.5625     | 0.02                | 0.3377  | 0.6696              | 0.14   | 0.0018              | 0.0188     |
| 286 | Acyl-CoA-binding protein                                          | P07108  | 0.0640              | 0.1676     | 0.17                | 0.4666  | 0.7979              | 0.11   | 0.0428              | 0.1123     |
| 287 | Acyl-coenzyme A synthetase ACSM5 mitochondrial                    | Q6NUN0  | 0.0726              | 0.1816     | 0.14                | 0.0943  | 0.6303              | 0.17   | 0.1147              | 0.2155     |
| 288 | Acyl-coenzyme A thioesterase 2 mitochondrial                      | P49753  | 0.4108              | 0.6279     | -3.31               | 0.5752  | 0.8787              | -1.75  | 0.5661              | 0.7843     |
| 289 | Acyl-coenzyme A thioesterase 8                                    | O14734  | 0.0720              | 0.1806     | -0.13               | 0.2469  | 0.6996              | 0.13   | 0.0473              | 0.1205     |
| 290 | Acyl-coenzyme A thioesterase 9 mitochondrial                      | Q9Y305  | 0.4108              | 0.6277     | -3.31               | 0.5752  | 0.8784              | -1.75  | 0.5661              | 0.7841     |
| 291 | Acyglycerol kinase mitochondrial                                  | Q53H12  | 0.8562              | 0.8860     | 0.01                | 0.0877  | 0.6215              | 0.20   | 0.1780              | 0.3212     |
| 292 | Acyphosphatase-1                                                  | P07311  | 0.4108              | 0.6275     | -3.31               | 0.5752  | 0.8781              | -1.75  | 0.5661              | 0.7839     |
| 293 | Acyphosphatase-1                                                  | Q75608  | 0.3786              | 0.5945     | 0.03                | 0.5534  | 0.6869              | 0.08   | 0.0283              | 0.0851     |
| 294 | Acyl-protein thioesterase 2                                       | O95372  | 0.0598              | 0.1619     | -0.30               | 0.7309  | 0.8040              | -0.04  | 0.0206              | 0.0692     |



Supplementary Table S2. Overview on all relatively quantified 5180 proteins statistical analysis

| Protein name                                                                     | UniProt | MCF-7   |            |        | MDA-MB-231 |            |        |
|----------------------------------------------------------------------------------|---------|---------|------------|--------|------------|------------|--------|
|                                                                                  |         | p value | BH q value | log2FC | p value    | BH q value | log2FC |
| 376 Alpha-2-macroglobulin receptor-associated protein                            | P30533  | 0.0315  | 0.1099     | -0.15  | 0.1312     | 0.6454     | 0.19   |
| 377 Alpha-actinin-1                                                              | P12814  | 0.0060  | 0.0471     | 0.19   | 0.2000     | 0.6637     | 0.27   |
| 378 Alpha-actinin-2                                                              | P35609  | 0.1308  | 0.2727     | 0.08   | 0.2743     | 0.6646     | 0.19   |
| 379 Alpha-actinin-3                                                              | Q08043  | 0.0872  | 0.2053     | 0.18   | 0.1361     | 0.6510     | 0.28   |
| 380 Alpha-actinin-4                                                              | Q43707  | 0.0680  | 0.1733     | 0.11   | 0.5314     | 0.8506     | 0.10   |
| 381 Alpha-aminoadipyl semialdehyde dehydrogenase                                 | P49419  | 0.1728  | 0.3341     | 0.05   | 0.3477     | 0.7030     | 0.14   |
| 382 Alpha-actinin-5                                                              | P61163  | 0.1488  | 0.2977     | 0.09   | 0.1085     | 0.6315     | 0.23   |
| 383 Alpha-actinin-6                                                              | Q43768  | 0.1863  | 0.3516     | 0.09   | 0.6325     | 0.7289     | 0.09   |
| 384 Alpha-actinin-7                                                              | P06733  | 0.0002  | 0.0167     | 0.43   | 0.0020     | 0.6174     | 0.44   |
| 385 Alpha-galactosidase A                                                        | Q06801  | 0.9401  | 0.9548     | 0.00   | 0.2801     | 0.6646     | -0.33  |
| 386 Alpha-internexin                                                             | P16352  | 0.4108  | 0.6257     | -3.31  | 0.5782     | 0.8756     | -1.75  |
| 387 Alpha-ketoglutarate-dependent dioxygenase alkB homolog 3                     | Q96083  | 0.1047  | 0.2318     | 0.14   | 0.9575     | 0.9714     | 0.00   |
| 388 Alpha-ketoglutarate-dependent dioxygenase alkB homolog 4                     | Q9NXW9  | 0.0032  | 0.0372     | -2.64  | 0.3076     | 0.6777     | -2.15  |
| 389 Alpha-ketoglutarate-dependent dioxygenase FTO                                | Q9C0B1  | 0.4108  | 0.6255     | -3.31  | 0.5752     | 0.8753     | -1.75  |
| 390 Alpha-N-acetylgalactosaminidase                                              | P17050  | 0.0067  | 0.0493     | 0.27   | 0.0702     | 0.4098     | 0.27   |
| 391 Alpha-N-acetylglucosaminidase                                                | P54802  | 0.0283  | 0.1022     | 0.29   | 0.5913     | 0.6960     | -0.05  |
| 392 Alpha-parvin                                                                 | Q9NVD7  | 0.9431  | 0.9573     | 0.00   | 0.1103     | 0.6327     | 0.13   |
| 393 Alpha-protein kinase 2                                                       | Q861B3  | 0.4108  | 0.6253     | -3.31  | 0.5752     | 0.8750     | -1.75  |
| 394 Alpha-S1-asein                                                               | P47710  | 0.5135  | 0.5961     | 0.04   | 0.4777     | 0.8037     | -0.51  |
| 395 Alpha-soluble NSF attachment protein                                         | P54920  | 0.0892  | 0.2085     | -0.12  | 0.8068     | 0.8608     | 0.01   |
| 396 Alpha-tubulin                                                                | P40222  | 0.5840  | 0.6511     | 0.04   | 0.0109     | 0.4343     | 0.32   |
| 397 Aridolipid phosphatase                                                       | Q06203  | 0.1231  | 0.2605     | 0.06   | 0.8978     | 0.9275     | 0.01   |
| 398 Arine oxidase [flavin-containing] A                                          | P21397  | 0.9862  | 0.9896     | 0.00   | 0.9790     | 0.9857     | 0.00   |
| 399 Aminoacyl tRNA synthase complex-interacting multifunctional protein 1        | Q12904  | 0.0091  | 0.0568     | 0.16   | 0.2996     | 0.6736     | 0.14   |
| 400 Aminoacyl tRNA synthase complex-interacting multifunctional protein 2        | Q13155  | 0.0010  | 0.0229     | 0.28   | 0.1253     | 0.6420     | 0.14   |
| 401 Aminopeptidase B                                                             | Q9H4A4  | 0.3504  | 0.5600     | -0.04  | 0.3152     | 0.6809     | 0.12   |
| 402 Amyloid-beta A4 precursor protein-binding family B member 2                  | P15514  | 0.0010  | 0.0228     | 0.85   | 0.3790     | 0.7258     | -0.18  |
| 403 Amyloid-beta A4 precursor protein-binding family B member 3                  | Q92870  | 0.4108  | 0.6251     | -3.31  | 0.5752     | 0.8748     | -1.75  |
| 404 Amyloid-beta A4 precursor protein-binding family B member 3                  | Q95704  | 0.4108  | 0.6249     | -3.31  | 0.5752     | 0.8745     | -1.75  |
| 405 Amyloid-beta precursor protein                                               | P05067  | 0.6059  | 0.6709     | -0.03  | 0.0528     | 0.5819     | -0.38  |
| 406 Amyotrophic lateral sclerosis 2 chromosomal region candidate gene 12 protein | Q96Q35  | 0.4108  | 0.6248     | -3.31  | 0.5752     | 0.8743     | -1.75  |
| 407 AN1-type zinc finger protein 1                                               | Q8TCF1  | 0.0163  | 0.0744     | -0.37  | 0.6954     | 0.7755     | -0.07  |
| 408 AN1-type zinc finger protein 6                                               | Q6FIF0  | 0.2190  | 0.3950     | -0.09  | 0.8433     | 0.8875     | 0.06   |
| 409 Anaromins                                                                    | Q6F81R  | 0.1206  | 0.2563     | 0.06   | 0.5352     | 0.8512     | 0.09   |
| 410 Anarobins                                                                    | Q8N7X0  | 0.4108  | 0.6246     | -3.31  | 0.5752     | 0.8740     | -1.75  |
| 411 Anarobins-associated migratory cell protein                                  | Q13685  | 0.1370  | 0.2818     | -0.25  | 0.0803     | 0.6318     | -0.70  |
| 412 Angiotensin-1                                                                | Q15389  | 0.0255  | 0.0966     | -0.29  | 0.7795     | 0.8412     | 0.04   |
| 413 Angiotensin-2                                                                | Q15123  | 0.4108  | 0.6244     | -3.31  | 0.5752     | 0.8738     | -1.75  |
| 414 Anillin                                                                      | Q9N0W6  | 0.0019  | 0.0305     | -0.86  | 0.1015     | 0.6319     | -0.61  |
| 415 Anion exchange protein 3                                                     | P48751  | 0.1886  | 0.3544     | -0.25  | 0.1980     | 0.6690     | -0.26  |
| 416 Ankocorin                                                                    | Q9P0K7  | 0.4108  | 0.6242     | -3.31  | 0.5752     | 0.8735     | -1.75  |
| 417 Ankocorin and armadillo repeat-containing protein                            | Q7Z3J8  | 0.8031  | 0.8411     | 0.06   | 0.6419     | 0.7360     | -0.18  |
| 418 Ankocorin repeat and KH domain-containing protein 1                          | Q8WZ23  | 0.6383  | 0.7002     | 0.02   | 0.3806     | 0.7275     | 0.07   |
| 419 Ankocorin repeat and LIM domain-containing protein 1                         | Q8NAC6  | 0.0101  | 0.0387     | -1.28  | 0.2795     | 0.6654     | -1.23  |
| 420 Ankocorin repeat and MYND domain-containing protein 2                        | Q8V3R8  | 0.4108  | 0.6240     | -3.31  | 0.5752     | 0.8733     | -1.75  |
| 421 Ankocorin repeat domain-containing protein 11                                | Q6UB99  | 0.4108  | 0.6238     | -3.31  | 0.5752     | 0.8730     | -1.75  |
| 422 Ankocorin repeat domain-containing protein 12                                | Q6UB98  | 0.4108  | 0.6237     | -3.31  | 0.5752     | 0.8727     | -1.75  |
| 423 Ankocorin repeat domain-containing protein 16                                | Q6P6B7  | 0.0480  | 0.1410     | -0.50  | 0.1743     | 0.6610     | -0.20  |
| 424 Ankocorin repeat domain-containing protein 17                                | Q75179  | 0.4108  | 0.6235     | -3.31  | 0.5752     | 0.8725     | -1.75  |
| 425 Ankocorin repeat domain-containing protein 18A                               | Q8V4F6  | 0.1538  | 0.3052     | -0.30  | 0.3237     | 0.6855     | -0.19  |
| 426 Ankocorin repeat domain-containing protein 20A3                              | Q5VUR7  | 0.1483  | 0.2969     | 0.03   | 0.6454     | 0.7382     | 0.03   |
| 427 Ankocorin repeat domain-containing protein 20A4                              | Q4UJ75  | 0.4108  | 0.6233     | -3.31  | 0.5752     | 0.8722     | -1.75  |
| 428 Ankocorin repeat domain-containing protein 20B                               | Q5CZ79  | 0.0187  | 0.0804     | 0.17   | 0.0657     | 0.5950     | 0.30   |
| 429 Ankocorin repeat domain-containing protein 26                                | Q9UP88  | 0.3879  | 0.6047     | -0.05  | 0.7666     | 0.8306     | 0.04   |
| 430 Ankocorin repeat domain-containing protein 35                                | Q8N283  | 0.8871  | 0.9108     | 0.01   | 0.3357     | 0.6950     | 0.05   |
| 431 Ankocorin repeat domain-containing protein 36C                               | Q5JPF3  | 0.1764  | 0.3387     | 0.25   | 0.3024     | 0.6755     | -0.74  |
| 432 Ankocorin repeat domain-containing protein 50                                | Q5ULJ7  | 0.6440  | 0.7057     | 0.02   | 0.1676     | 0.6607     | 0.45   |
| 433 Ankocorin repeat domain-containing protein 54                                | Q6NXT1  | 0.0003  | 0.0167     | 0.42   | 0.0019     | 0.2289     | 0.36   |
| 434 Ankocorin repeat domain-containing protein 62                                | Q6N5T7  | 0.5168  | 0.5891     | 0.03   | 0.0927     | 0.2498     | 0.45   |
| 435 Ankocorin-2                                                                  | Q01484  | 0.0672  | 0.1718     | 0.12   | 0.0998     | 0.6351     | 0.26   |
| 436 Ankocorin A1                                                                 | P04083  | 0.4108  | 0.6231     | -3.31  | 0.5752     | 0.8720     | -1.75  |
| 437 Ankocorin A11                                                                | P05995  | 0.8816  | 0.9068     | 0.01   | 0.8178     | 0.8700     | 0.03   |
| 438 Ankocorin A13                                                                | P27216  | 0.1106  | 0.2414     | -0.16  | 0.1077     | 0.7123     | -0.06  |
| 439 Ankocorin A2                                                                 | P07355  | 0.0020  | 0.0311     | 0.22   | 0.1905     | 0.6690     | 0.26   |
| 440 Ankocorin A3                                                                 | P12429  | 0.4108  | 0.6229     | -3.31  | 0.5752     | 0.8717     | -1.75  |
| 441 Ankocorin A4                                                                 | P09525  | 0.0842  | 0.2005     | -0.06  | 0.1503     | 0.6598     | 0.17   |
| 442 Ankocorin A5                                                                 | P08758  | 0.0042  | 0.0408     | 0.14   | 0.2020     | 0.6096     | 0.18   |
| 443 Ankocorin A6                                                                 | P08133  | 0.1108  | 0.2418     | 0.07   | 0.1568     | 0.6620     | 0.25   |
| 444 Ankocorin A7                                                                 | P20073  | 0.0276  | 0.1007     | 0.25   | 0.1022     | 0.6623     | 0.22   |
| 445 Ankocorin A8                                                                 | P13928  | 0.0000  | 0.0000     | 5.34   | 0.1346     | 0.6492     | 2.90   |
| 446 Ankocorin A9                                                                 | Q76027  | 0.0084  | 0.0545     | -0.52  | 0.0600     | 0.4933     | -0.41  |
| 447 Anosmin-1                                                                    | P23352  | 0.4108  | 0.6228     | -3.31  | 0.5752     | 0.8715     | -1.75  |
| 448 Anosmin gradient protein 2 homolog                                           | Q95994  | 0.0723  | 0.1810     | 0.10   | 0.1503     | 0.6604     | 0.27   |
| 449 AP-1 complex subunit beta-1                                                  | Q10567  | 0.5998  | 0.6659     | 0.05   | 0.1925     | 0.6679     | 0.17   |







Supplementary Table S2. Overview on all relatively quantified 5180 proteins statistical analysis

| Protein name                                                                               | UniProt | MCF-7               |            |                     |         | MDA-MB-231          |        |                     |            |
|--------------------------------------------------------------------------------------------|---------|---------------------|------------|---------------------|---------|---------------------|--------|---------------------|------------|
|                                                                                            |         | Dai SC20 vs control |            | Gen SC20 vs control |         | SSE SC20 vs control |        | Dai IC20 vs control |            |
|                                                                                            |         | p value             | BH q value | log2FC              | p value | BH q value          | log2FC | p value             | BH q value |
| 602 Beta-1,3-galactosyl-O-glycosyl-glycoprotein beta-1,6-N-acetylglucosaminyltransferase   | Q02742  | 0.0709              | 0.1785     | -0.19               | 0.8414  | 0.8862              | 0.02   | 0.0210              | 0.0701     |
| 603 Beta-1,3-galactosyl-O-glycosyl-glycoprotein beta-1,6-N-acetylglucosaminyltransferase 4 | Q9P109  | 0.0004              | 0.0176     | 0.30                | 0.2797  | 0.6652              | 0.21   | 0.0022              | 0.0263     |
| 604 Beta-1,3-galactosyltransferase 2                                                       | O43825  | 0.0639              | 0.1674     | -0.12               | 0.6767  | 0.6858              | -0.08  | 0.3231              | 0.5107     |
| 605 Beta-actin-like protein 2                                                              | Q562R1  | 0.0069              | 0.0498     | 0.14                | 0.1089  | 0.6303              | -0.15  | 0.0006              | 0.0202     |
| 606 Beta-adenosine receptor kinase 2                                                       | P15626  | 0.4108              | 0.6186     | -3.31               | 0.5752  | 0.8656              | -1.75  | 0.5661              | 0.7737     |
| 607 Beta-arrestin-1                                                                        | P49407  | 0.0046              | 0.0431     | -0.63               | 0.6575  | 0.7476              | -0.07  | 0.0064              | 0.0385     |
| 608 Beta-catenin-like protein 1                                                            | Q8WY46  | 0.4108              | 0.6184     | -3.31               | 0.5752  | 0.8654              | -1.75  | 0.5661              | 0.7737     |
| 609 Beta-contractin                                                                        | P42025  | 0.0314              | 0.1098     | 0.11                | 0.1060  | 0.6311              | 0.19   | 0.0183              | 0.0648     |
| 610 Beta-crystallin A3                                                                     | P05813  | 0.1871              | 0.3528     | -1.48               | 0.1683  | 0.6605              | -2.26  | 0.1399              | 0.2647     |
| 611 Beta-defensin 116                                                                      | Q30KQ4  | 0.1474              | 0.2957     | 0.30                | 0.1163  | 0.6361              | 0.33   | 0.0559              | 0.1351     |
| 612 Beta-defensin 119                                                                      | Q8N690  | 0.5438              | 0.6141     | -0.04               | 0.5558  | 0.8701              | -0.08  | 0.2663              | 0.4374     |
| 613 Beta-defensin 132                                                                      | Q7Z7B7  | 0.4108              | 0.6182     | -3.31               | 0.5752  | 0.8651              | -1.75  | 0.5661              | 0.7733     |
| 614 Beta-enolase                                                                           | P13929  | 0.0114              | 0.0613     | 0.25                | 0.0445  | 0.5678              | 0.26   | 0.0199              | 0.0680     |
| 615 Beta-hexosaminidase subunit alpha                                                      | P06865  | 0.6609              | 0.7209     | 0.01                | 0.3327  | 0.6916              | -0.03  | 0.1327              | 0.2548     |
| 616 Beta-hexosaminidase subunit beta                                                       | P07686  | 0.0291              | 0.1042     | -0.17               | 0.6337  | 0.7070              | -0.02  | 0.2277              | 0.3867     |
| 617 Beta-klotho                                                                            | Q86214  | 0.1684              | 0.3271     | -0.10               | 0.0580  | 0.5879              | -0.31  | 0.2108              | 0.3652     |
| 618 Beta-parvin                                                                            | Q9HIB1  | 0.0056              | 0.0453     | -0.28               | 0.1164  | 0.6360              | -0.19  | 0.0299              | 0.0878     |
| 619 Beta-soluble NSF attachment protein                                                    | Q9H115  | 0.2100              | 0.3826     | -0.15               | 0.0337  | 0.5290              | 0.33   | 0.0196              | 0.0675     |
| 620 Beta-tetradopropionase                                                                 | Q9UIR1  | 0.5731              | 0.6405     | 1.27                | 0.1244  | 0.6412              | 1.62   | 0.6062              | 0.6618     |
| 621 BH3-interacting domain death agonist                                                   | P55957  | 0.4456              | 0.5230     | -0.08               | 0.3158  | 0.6805              | 0.11   | 0.7279              | 0.7717     |
| 622 Bifunctional 3'-phosphoadenosine 5'-phosphosulfate synthase 1                          | O43252  | 0.0024              | 0.0338     | -0.20               | 0.9971  | 0.9981              | 0.00   | 0.0530              | 0.1303     |
| 623 Bifunctional 3'-phosphoadenosine 5'-phosphosulfate synthase 2                          | O95340  | 0.0150              | 0.0711     | -0.29               | 0.9879  | 0.9913              | 0.00   | 0.0042              | 0.0320     |
| 624 Bifunctional arginine demethylase and lysyl-hydroxylase JMJD6                          | Q6NYC1  | 0.2378              | 0.4221     | 0.17                | 0.0122  | 0.4358              | 0.37   | 0.0133              | 0.0539     |
| 625 Bifunctional coenzyme A synthase                                                       | Q13057  | 0.7365              | 0.7858     | -0.02               | 0.1750  | 0.6617              | 0.12   | 0.5850              | 0.6412     |
| 626 Bifunctional glutamate/proline-tRNA ligase                                             | P07814  | 0.0261              | 0.0979     | 0.12                | 0.0638  | 0.7985              | 0.10   | 0.0038              | 0.0314     |
| 627 Bifunctional methyltetrahydrofolate dehydrogenase/cyclohydrolase, mitochondrial        | P13995  | 0.0085              | 0.0547     | 0.40                | 0.3327  | 0.6921              | 0.19   | 0.0369              | 0.1008     |
| 628 Bifunctional purine biosynthesis protein PURH                                          | P31939  | 0.0653              | 0.1691     | 0.08                | 0.1364  | 0.6512              | 0.21   | 0.0051              | 0.0350     |
| 629 Biliverdin reductase A                                                                 | P53004  | 0.0424              | 0.1303     | 0.21                | 0.2008  | 0.6621              | 0.23   | 0.0139              | 0.0553     |
| 630 Biogenesis of lysosome-related organelles complex 1 subunit 1                          | P78537  | 0.0148              | 0.0707     | -4.36               | 0.0495  | 0.5749              | -9.86  | 0.0125              | 0.0526     |
| 631 Biogenesis of lysosome-related organelles complex 1 subunit 2                          | Q6QNY1  | 0.8111              | 0.8479     | 0.05                | 0.6385  | 0.7335              | -0.08  | 0.1693              | 0.3089     |
| 632 Biorientation of chromosomes in cell division protein 1-like 1                         | Q8NFC6  | 0.0001              | 0.0148     | -0.21               | 0.9107  | 0.9379              | 0.02   | 0.3991              | 0.6022     |
| 633 Bleomycin hydrolase                                                                    | Q13867  | 0.0667              | 0.1711     | -2.56               | 0.0669  | 0.5934              | -9.23  | 0.0992              | 0.2028     |
| 634 Blood vessel epicardial substance                                                      | Q8NE79  | 0.0601              | 0.1621     | -0.11               | 0.5007  | 0.8231              | -0.27  | 0.0008              | 0.0202     |
| 635 Bloom syndrome protein                                                                 | P54132  | 0.1634              | 0.3201     | -0.14               | 0.3762  | 0.7242              | 0.08   | 0.1743              | 0.3161     |
| 636 BMP-binding endothelial regulator protein                                              | Q8NRU9  | 0.0280              | 0.1017     | 0.16                | 0.4160  | 0.7548              | 0.11   | 0.3642              | 0.5615     |
| 637 BoLA-like protein 1                                                                    | Q9Y3E2  | 0.0423              | 0.1303     | -0.40               | 0.1424  | 0.6545              | -0.33  | 0.6689              | 0.7193     |
| 638 BoLA-like protein 2                                                                    | Q9H3K6  | 0.0446              | 0.1345     | 0.12                | 0.0578  | 0.5882              | 0.18   | 0.0013              | 0.0235     |
| 639 Bone marrow proteoglycan                                                               | P13727  | 0.8767              | 0.9028     | 0.15                | 0.4547  | 0.7875              | 0.50   | 0.0015              | 0.0225     |
| 640 Bone morphogenetic protein 5                                                           | P22003  | 0.4108              | 0.6180     | -3.31               | 0.5752  | 0.8649              | -1.75  | 0.5661              | 0.7731     |
| 641 Bone morphogenetic protein receptor type-1A                                            | P36894  | 0.0049              | 0.0435     | 1.22                | 0.2169  | 0.6601              | 0.41   | 0.0137              | 0.0549     |
| 642 Box C/D snRNA protein 1                                                                | Q8NWK9  | 0.4108              | 0.6179     | -3.31               | 0.5752  | 0.8646              | -1.75  | 0.5661              | 0.7729     |
| 643 Brain acid soluble protein 1                                                           | P80723  | 0.0068              | 0.0494     | -0.49               | 0.3130  | 0.6807              | 0.25   | 0.0664              | 0.1512     |
| 644 Brain-specific angiogenesis inhibitor 1-associated protein 2                           | Q9UQB8  | 0.0486              | 0.1418     | 0.12                | 0.4508  | 0.7849              | 0.04   | 0.0041              | 0.0320     |
| 645 Brain-specific angiogenesis inhibitor 1-associated protein 2-like protein 1            | Q9UIH4  | 0.0263              | 0.0983     | 0.15                | 0.1315  | 0.6457              | 0.12   | 0.0033              | 0.0310     |
| 646 Branched-chain-amino-acid aminotransferase, mitochondrial                              | O15382  | 0.0843              | 0.2005     | 0.19                | 0.4093  | 0.7508              | -0.17  | 0.6132              | 0.6680     |
| 647 BRCA1-A complex subunit RAP80                                                          | Q96R1L  | 0.8381              | 0.8707     | -0.02               | 0.3247  | 0.6857              | 0.15   | 0.3889              | 0.5902     |
| 648 BRCA1-associated ATM activator 1                                                       | Q6PJG6  | 0.2202              | 0.3963     | -0.19               | 0.2003  | 0.4715              | 0.35   | 0.4504              | 0.6641     |
| 649 BRCA1-associated protein                                                               | Q7Z569  | 0.4108              | 0.6177     | -3.31               | 0.5752  | 0.8644              | -1.75  | 0.5661              | 0.7727     |
| 650 BRCA2 and CDKN1A-interacting protein                                                   | Q9P287  | 0.7473              | 0.7944     | 0.05                | 0.6060  | 0.7086              | -0.20  | 0.6218              | 0.6760     |
| 651 Breast cancer anti-estrogen resistance protein 1                                       | P56945  | 0.6678              | 0.7272     | 0.02                | 0.5932  | 0.6976              | 0.04   | 0.0232              | 0.0750     |
| 652 Breast cancer anti-estrogen resistance protein 3                                       | Q75815  | 0.5469              | 0.6161     | -0.02               | 0.7382  | 0.8096              | 0.05   | 0.0118              | 0.0508     |
| 653 Breast carcinoma-amplified sequence 1                                                  | Q75363  | 0.0379              | 0.1223     | -0.14               | 0.1176  | 0.6319              | 0.31   | 0.8132              | 0.8486     |
| 654 Brefeldin A-inhibited guanine nucleotide-exchange protein 1                            | Q9Y6D6  | 0.0000              | 0.0000     | -0.97               | 0.0671  | 0.5911              | -0.21  | 0.9691              | 0.9740     |
| 655 Brefeldin A-inhibited guanine nucleotide-exchange protein 2                            | Q9Y6D5  | 0.0023              | 0.0331     | -1.29               | 0.4994  | 0.8220              | -0.91  | 0.0438              | 0.1140     |
| 656 BR13-binding protein                                                                   | Q8WY22  | 0.0186              | 0.0802     | -0.11               | 0.0860  | 0.6196              | -0.11  | 0.1760              | 0.3184     |
| 657 BRIS1 and BRCA1-A complex member 2                                                     | Q9NXX7  | 0.0135              | 0.0680     | 0.70                | 0.1035  | 0.6337              | 0.29   | 0.5102              | 0.7313     |
| 658 BRIS1 complex subunit Abraxas 2                                                        | Q15018  | 0.5694              | 0.6373     | -0.01               | 0.0597  | 0.5924              | 0.18   | 0.0023              | 0.0269     |
| 659 BRO1 domain-containing protein BROX                                                    | P5VW32  | 0.1374              | 0.2822     | 0.16                | 0.1252  | 0.5959              | 0.19   | 0.0175              | 0.0630     |
| 660 Bromodomain adjacent to zinc finger domain protein 2B                                  | Q9UIF8  | 0.4108              | 0.6175     | -3.31               | 0.5752  | 0.8641              | -1.75  | 0.5661              | 0.7725     |
| 661 Bromodomain-containing protein 2                                                       | P25440  | 0.4108              | 0.6173     | -3.31               | 0.5752  | 0.8639              | -1.75  | 0.5661              | 0.7723     |
| 662 Bromodomain-containing protein 3                                                       | P15059  | 0.4108              | 0.6172     | -3.31               | 0.5752  | 0.8636              | -1.75  | 0.5661              | 0.7721     |
| 663 Bromodomain-containing protein 4                                                       | O60885  | 0.4108              | 0.6170     | -3.31               | 0.5752  | 0.8634              | -1.75  | 0.5661              | 0.7719     |
| 664 Bromodomain-containing protein 7                                                       | Q9NPI1  | 0.4108              | 0.6168     | -3.31               | 0.5752  | 0.8631              | -1.75  | 0.5661              | 0.7717     |
| 665 BTB/POZ domain-containing adapter for CUL3-mediated RhoA degradation protein 1         | Q8WZ19  | 0.4108              | 0.6166     | -3.31               | 0.5752  | 0.8629              | -1.75  | 0.5661              | 0.7715     |
| 666 BTB/POZ domain-containing protein 9                                                    | Q96Q07  | 0.4108              | 0.6164     | -3.31               | 0.5752  | 0.8626              | -1.75  | 0.5661              | 0.7713     |





Supplementary Table S2. Overview on all relatively quantified 5180 proteins statistical analysis

|     | Protein name                                          | UniProt | MCF-7               |            |                     |         | MDA-MB-231          |        |                     |            |
|-----|-------------------------------------------------------|---------|---------------------|------------|---------------------|---------|---------------------|--------|---------------------|------------|
|     |                                                       |         | Dai SC20 vs control |            | Gen SC20 vs control |         | Dai IC20 vs control |        | Gen IC20 vs control |            |
|     |                                                       |         | p value             | BH q value | log2FC              | p value | BH q value          | log2FC | p value             | BH q value |
| 819 | Cell cycle and apoptosis regulator protein 2          | Q8N163  | 0.2064              | 0.3790     | -0.05               | 0.7343  | 0.8065              | -0.04  | 0.6977              | 0.7453     |
| 820 | Cell cycle checkpoint control protein RAD9A           | Q9638   | 0.1710              | 0.3313     | -0.13               | 0.8709  | 0.9066              | 0.01   | 0.1416              | 0.2674     |
| 821 | Cell cycle progression protein 1                      | Q9UL66  | 0.8607              | 0.8897     | -0.02               | 0.4117  | 0.7520              | 0.12   | 0.7579              | 0.7991     |
| 822 | Cell death activator CIDE-B                           | Q9U1UD4 | 0.0063              | 0.0479     | 0.50                | 0.0014  | 0.2198              | 0.75   | 0.0017              | 0.0241     |
| 823 | Cell division control protein 42 homolog              | P60953  | 0.0002              | 0.0162     | 0.62                | 0.2386  | 0.6624              | 0.13   | 0.5334              | 0.7541     |
| 824 | Cell division cycle 5-like protein                    | Q94959  | 0.8376              | 0.8705     | -0.01               | 0.7508  | 0.8193              | 0.00   | 0.4788              | 0.6981     |
| 825 | Cell division cycle and apoptosis regulator protein 1 | QRX12   | 0.0665              | 0.1710     | 0.21                | 0.3477  | 0.7033              | -0.48  | 0.0069              | 0.0397     |
| 826 | Cell division cycle protein 123 homolog               | Q75794  | 0.1176              | 0.2523     | 0.03                | 0.3402  | 0.6990              | 0.12   | 0.0159              | 0.0595     |
| 827 | Cell division cycle protein 20 homolog B              | Q86Y33  | 0.2946              | 0.4926     | -0.06               | 0.5575  | 0.8711              | 0.10   | 0.7051              | 0.7518     |
| 828 | Cell division cycle protein 23 homolog                | Q9UJX2  | 0.4108              | 0.6092     | -3.31               | 0.5752  | 0.8525              | -1.75  | 0.5661              | 0.7630     |
| 829 | Cell division cycle protein 27 homolog                | P30260  | 0.4108              | 0.6090     | -3.31               | 0.5752  | 0.8523              | -1.75  | 0.5661              | 0.7629     |
| 830 | Cell division cycle-associated 7-like protein         | Q96GN5  | 0.4108              | 0.6089     | -3.31               | 0.5752  | 0.8520              | -1.75  | 0.5661              | 0.7627     |
| 831 | Cell division cycle-associated protein 2              | Q6GYH5  | 0.2590              | 0.4480     | -0.04               | 0.3145  | 0.6799              | 0.06   | 0.0635              | 0.1468     |
| 832 | Cell division cycle-associated protein 7              | Q9BWT1  | 0.0118              | 0.0628     | 0.44                | 0.2012  | 0.6605              | 0.21   | 0.0207              | 0.0695     |
| 833 | Cell growth regulator with EF hand domain protein 1   | Q9674   | 0.0302              | 0.1069     | -0.58               | 0.2234  | 0.6579              | -0.31  | 0.0303              | 0.0885     |
| 834 | Cell growth-regulating nuclear protein                | Q9NXS8  | 0.4108              | 0.6087     | -3.31               | 0.5752  | 0.8518              | -1.75  | 0.5661              | 0.7625     |
| 835 | Cell surface glycoprotein MUC18                       | P43121  | 0.4108              | 0.6085     | -3.31               | 0.5752  | 0.8515              | -1.75  | 0.5661              | 0.7623     |
| 836 | Cellular nucleic acid-binding protein                 | P26233  | 0.3976              | 0.6131     | -0.04               | 0.5911  | 0.6959              | 0.03   | 0.0167              | 0.0611     |
| 837 | Cellular retinoic acid-binding protein 1              | P29762  | 0.3121              | 0.5133     | -0.08               | 0.5965  | 0.9977              | 0.00   | 0.7439              | 0.7864     |
| 838 | Cellular retinoic acid-binding protein 2              | P29773  | 0.7733              | 0.8157     | 0.02                | 0.4676  | 0.7976              | 0.15   | 0.7185              | 0.7636     |
| 839 | Centrin-1                                             | Q12798  | 0.0324              | 0.1121     | -2.45               | 0.3866  | 0.7973              | -2.24  | 0.2682              | 0.4402     |
| 840 | Centrin-2                                             | P41208  | 0.4108              | 0.6083     | -3.31               | 0.5752  | 0.8513              | -1.75  | 0.5661              | 0.7621     |
| 841 | Centriolin                                            | Q727A1  | 0.0053              | 0.0446     | 0.21                | 0.0942  | 0.6304              | 0.28   | 0.0018              | 0.0242     |
| 842 | Centromere protein F                                  | P49454  | 0.4108              | 0.6082     | -3.31               | 0.5752  | 0.8511              | -1.75  | 0.5661              | 0.7619     |
| 843 | Centromere protein J                                  | Q9HC77  | 0.4108              | 0.6080     | -3.31               | 0.5752  | 0.8508              | -1.75  | 0.5661              | 0.7617     |
| 844 | Centromere protein R                                  | Q13352  | 0.0025              | 0.0340     | 0.35                | 0.0457  | 0.5623              | 0.26   | 0.0005              | 0.0214     |
| 845 | Centromere protein V                                  | Q7Z7K6  | 0.4108              | 0.6078     | -3.31               | 0.5752  | 0.8506              | -1.75  | 0.5661              | 0.7615     |
| 846 | Centromere protein X                                  | ARMT69  | 0.0994              | 0.2241     | 0.15                | 0.0113  | 0.4304              | 0.36   | 0.0258              | 0.0800     |
| 847 | Centromere/kinetochore protein zw10 homolog           | Q43264  | 0.0263              | 0.0982     | -0.21               | 0.2305  | 0.6615              | -0.28  | 0.0295              | 0.0872     |
| 848 | Centromere-associated protein E                       | Q02224  | 0.0031              | 0.0370     | 0.26                | 0.0104  | 0.6621              | 0.17   | 0.0031              | 0.0301     |
| 849 | Centrosomal protein of 128 kDa                        | Q6ZU80  | 0.4108              | 0.6076     | -3.31               | 0.5752  | 0.8503              | -1.75  | 0.5661              | 0.7613     |
| 850 | Centrosomal protein of 135 kDa                        | Q66C89  | 0.0648              | 0.1684     | 0.10                | 0.0845  | 0.6200              | 0.21   | 0.1832              | 0.3280     |
| 851 | Centrosomal protein of 152 kDa                        | Q94986  | 0.4108              | 0.6075     | -3.31               | 0.5752  | 0.8501              | -1.75  | 0.5661              | 0.7611     |
| 852 | Centrosomal protein of 162 kDa                        | STBT80  | 0.1544              | 0.3062     | -0.13               | 0.3459  | 0.7027              | -0.12  | 0.3986              | 0.6020     |
| 853 | Centrosomal protein of 170 kDa                        | Q5SW79  | 0.0002              | 0.0159     | 0.25                | 0.0663  | 0.5942              | 0.31   | 0.1197              | 0.2361     |
| 854 | Centrosomal protein of 192 kDa                        | Q8TEP8  | 0.2676              | 0.4593     | 0.12                | 0.4652  | 0.7963              | 0.10   | 0.0896              | 0.1878     |
| 855 | Centrosomal protein of 290 kDa                        | Q15078  | 0.0129              | 0.0665     | 0.31                | 0.2009  | 0.6620              | 0.20   | 0.0036              | 0.0316     |
| 856 | Centrosomal protein of 295 kDa                        | Q15079  | 0.0129              | 0.0665     | 0.31                | 0.2009  | 0.6620              | 0.20   | 0.0036              | 0.0316     |
| 857 | Centrosomal protein of 41 kDa                         | Q9BYV8  | 0.1807              | 0.3405     | 0.08                | 0.3902  | 0.7242              | 0.15   | 0.0915              | 0.1904     |
| 858 | Centrosomal protein of 83 kDa                         | Q9Y592  | 0.1249              | 0.2631     | 0.08                | 0.0834  | 0.6189              | 0.22   | 0.0018              | 0.0242     |
| 859 | Centrosomal protein of 85 kDa-like                    | Q4S2L2  | 0.4108              | 0.6073     | -3.31               | 0.5752  | 0.8498              | -1.75  | 0.5661              | 0.7609     |
| 860 | Centrosomal protein of 95 kDa                         | Q96GE4  | 0.5623              | 0.6305     | -0.25               | 0.7671  | 0.8309              | -0.14  | 0.6882              | 0.7372     |
| 861 | Centrosome and spindle pole-associated protein 1      | Q1MSI5  | 0.0610              | 0.1636     | -0.83               | 0.3712  | 0.7183              | -0.71  | 0.0655              | 0.1001     |
| 862 | Centrosome-associated protein 350                     | Q5VT06  | 0.2554              | 0.4432     | 0.09                | 0.8555  | 0.8963              | -0.03  | 0.0060              | 0.0375     |
| 863 | Centrosome-associated protein CP250                   | Q9BY73  | 0.4108              | 0.6071     | -3.31               | 0.5752  | 0.8496              | -1.75  | 0.5661              | 0.7607     |
| 864 | Ceramide synthase 2                                   | Q96G23  | 0.1938              | 0.3615     | -0.04               | 0.4660  | 0.7974              | -0.08  | 0.0031              | 0.0298     |
| 865 | cGMP-gated cation channel alpha-1                     | P29973  | 0.4108              | 0.6069     | -3.31               | 0.5752  | 0.8494              | -1.75  | 0.5661              | 0.7605     |
| 866 | Charged multivesicular body protein 1a                | Q9HD42  | 0.2064              | 0.3789     | -0.04               | 0.2386  | 0.6620              | 0.12   | 0.0019              | 0.0241     |
| 867 | Charged multivesicular body protein 2b                | Q9UQN3  | 0.2605              | 0.4498     | -0.10               | 0.2264  | 0.6385              | 0.20   | 0.4306              | 0.6408     |
| 868 | Charged multivesicular body protein 3                 | Q9Y3E7  | 0.0571              | 0.1568     | -0.36               | 0.0849  | 0.6203              | -0.20  | 0.0002              | 0.0203     |
| 869 | Charged multivesicular body protein 4a                | Q9BY43  | 0.0058              | 0.0461     | 0.13                | 0.1738  | 0.6610              | 0.11   | 0.0016              | 0.0235     |
| 870 | Charged multivesicular body protein 4b                | Q9H444  | 0.0086              | 0.0550     | 0.17                | 0.1982  | 0.6671              | 0.26   | 0.0101              | 0.0468     |
| 871 | Charged multivesicular body protein 4c                | Q96CF2  | 0.0041              | 0.0405     | 0.61                | 0.0086  | 0.4203              | 0.46   | 0.0046              | 0.0337     |
| 872 | Charged multivesicular body protein 5                 | Q9NZ23  | 0.3507              | 0.5602     | -0.04               | 0.1772  | 0.6632              | 0.21   | 0.0403              | 0.1072     |
| 873 | Charged multivesicular body protein 6                 | Q96FZ7  | 0.3397              | 0.5476     | 0.16                | 0.1420  | 0.6544              | 0.27   | 0.0496              | 0.0904     |
| 874 | Chitinase domain-containing protein 1                 | Q9BWS9  | 0.5303              | 0.5602     | 0.14                | 0.0194  | 0.4631              | 0.56   | 0.2057              | 0.3589     |
| 875 | Chloride channel CLIC-like protein 1                  | Q96S66  | 0.0511              | 0.1465     | 0.22                | 0.0507  | 0.5734              | 0.18   | 0.0514              | 0.1274     |
| 876 | Chloride intracellular channel protein 1              | Q00299  | 0.2522              | 0.4391     | 0.05                | 0.2604  | 0.6645              | 0.26   | 0.0176              | 0.0632     |
| 877 | Chloride intracellular channel protein 2              | Q15247  | 0.4108              | 0.6068     | -3.31               | 0.5752  | 0.8491              | -1.75  | 0.5661              | 0.7603     |
| 878 | Chloride intracellular channel protein 3              | Q95833  | 0.0000              | 0.0000     | -0.04               | 0.0046  | 0.3556              | 0.25   | 0.0004              | 0.0244     |
| 879 | Chloride intracellular channel protein 4              | Q9Y696  | 0.1163              | 0.2503     | 0.10                | 0.1216  | 0.6388              | 0.38   | 0.0047              | 0.0335     |
| 880 | Chloride intracellular channel protein 5              | Q9NZA1  | 0.6836              | 0.7402     | -0.44               | 0.2734  | 0.6628              | -1.55  | 0.3174              | 0.5043     |
| 881 | Choline O-acetyltransferase                           | P28329  | 0.4108              | 0.6066     | -3.31               | 0.5752  | 0.8489              | -1.75  | 0.5661              | 0.7601     |
| 882 | Choline transporter-like protein 1                    | QRW015  | 0.4108              | 0.6064     | -3.31               | 0.5752  | 0.8486              | -1.75  | 0.5661              | 0.7599     |
| 883 | Choline-phosphate cytidylyltransferase A              | P49585  | 0.0021              | 0.0318     | -0.09               | 0.9118  | 0.9384              | -0.01  | 0.0070              | 0.0395     |
| 884 | Choline-phosphate cytidylyltransferase B              | Q9Y5K3  | 0.1261              | 0.2650     | -0.08               | 0.5319  | 0.8501              | 0.10   | 0.0068              | 0.0394     |
| 885 | Chondrolectin                                         | Q9H9P2  | 0.9225              | 0.9407     | -0.01               | 0.0860  | 0.6187              | 0.16   | 0.0063              | 0.0386     |
| 886 | Chromatin accessibility complex protein 1             | Q9NRG0  | 0.4108              | 0.6063     | -3.31               | 0.5752  | 0.8484              | -1.75  | 0.5661              | 0.7597     |
| 887 | Chromatin complex subunit BAP18                       | Q8IXM2  | 0.4108              | 0.6061     | -3.31               | 0.5752  | 0.8481              | -1.75  | 0.5661              | 0.7595     |
| 888 | Chromatin target of PRMT1 protein                     | Q9Y3Y2  | 0.4108              | 0.6059     | -3.31               | 0.5752  | 0.8479              | -1.75  | 0.5661              | 0.7593     |
| 889 | Chromobox protein homolog 1                           | P83916  | 0.0624              | 0.1657     | -0.13               | 0.0264  | 0.4955              | -0.33  | 0.0993              | 0.9994     |
| 890 | Chromobox protein homolog 3                           | Q13185  | 0.0409              | 0.1279     | 0.10                | 0.3400  | 0.6909              | 0.17   | 0.0630              | 0.2004     |
| 891 | Chromobox protein homolog 5                           | P45973  | 0.1307              | 0.2726     | 0.04                | 0.3787  | 0.7260              | 0.05   | 0.2065              | 0.3596     |
| 892 | Chromodomain-helicase-DNA-binding protein 1           | Q14646  | 0.0113              | 0.0612     | -0.21               | 0.0858  | 0.6199              | -0.25  | 0.0716              | 0.1596     |
| 893 | Chromodomain-helicase-DNA-binding protein 1-like      | QR6W11  | 0.3763              | 0.5918     | -0.02               | 0.3510  | 0.7039              | -0.10  | 0.0973              | 0.1999     |
| 894 | Chromodomain-helicase-DNA-binding protein 3           | Q12873  | 0.4108              | 0.6057     | -3.31               | 0.5752  | 0.8477              | -1.75  | 0.5661              | 0.7591     |
| 895 | Chromodomain-helicase-DNA-binding protein 4           | Q14839  | 0.1426              | 0.2892     | 0.09                | 0.3639  | 0.7127              | 0.12   | 0.0505              | 0.0477     |
| 896 | Chromosome-associated kinesin KIF4A                   | Q95239  | 0.4108              | 0.6056     | -3.31               | 0.5752  | 0.8474              | -1.75  | 0.5661              | 0.7589     |
| 897 | Chromosome-associated kinesin KIF4B                   | Q2VIQ3  | 0.0008              | 0.0217     | 0.18                | 0.0939  | 0.6309              | 0.24   | 0.0466              | 0.1194     |
| 898 | Chymotrypsin-C                                        | Q98995  | 0.4108              | 0.6054     | -3.31               | 0.5752  | 0.8472              | -1.75  | 0.5661              | 0.7587     |
| 899 | Chymotrypsin-like elastase family member 2A           | P08217  | 0.2172              | 0.3924     | -0.06               | 0.0116  | 0.4323              | -0.29  | 0.0097              | 0.0460     |
| 900 | Cilia- and flagella-associated protein 161            | Q6P656  | 0.4108              | 0.6052     | -3.31               | 0.5752  | 0.8469              | -1.75  | 0.5661              | 0.7585     |
| 901 | Cilia- and flagella-associated protein 20             | Q9Y6A4  | 0.4108              | 0.6050     | -3.31               | 0.5752  | 0.8467              | -1.75  | 0.5661              | 0.7583     |
| 902 | Cilia- and flagella-associated protein 298            | P57076  | 0.3525              | 0.5625     | -0.15               | 0.3726  | 0.7204              | -0.18  | 0.6487              | 0.7009     |



Supplementary Table S2. Overview on all relatively quantified 5180 proteins statistical analysis

| Protein name                                                                      | UniProt | MCF-7               |            |                     |         | MDA-MB-231          |        |                     |            |
|-----------------------------------------------------------------------------------|---------|---------------------|------------|---------------------|---------|---------------------|--------|---------------------|------------|
|                                                                                   |         | Dai SC20 vs control |            | Gen SC20 vs control |         | Dai IC20 vs control |        | Gen IC20 vs control |            |
|                                                                                   |         | p value             | BH q value | log2FC              | p value | BH q value          | log2FC | p value             | BH q value |
| 984 Coiled-coil domain-containing protein 66                                      | A2RUB6  | 0.0126              | 0.0655     | -0.10               | 0.0143  | 0.4517              | -0.30  | 0.0781              | 0.1693     |
| 985 QH2F9                                                                         | Q9H2F9  | 0.4108              | 0.6025     | -3.31               | 0.5752  | 0.8431              | -1.75  | 0.5661              | 0.7556     |
| 986 Coiled-coil domain-containing protein 7                                       | Q96M83  | 0.0425              | 0.1306     | -0.19               | 0.5509  | 0.8663              | -0.08  | 0.4398              | 0.5440     |
| 987 Coiled-coil domain-containing protein 83                                      | Q8W8F9  | 0.0375              | 0.1217     | 0.21                | 0.2934  | 0.6698              | -0.27  | 0.0229              | 0.0745     |
| 988 Coiled-coil domain-containing protein 85B                                     | Q15834  | 0.2391              | 0.4236     | 0.13                | 0.1159  | 0.6367              | 0.21   | 0.3174              | 0.5045     |
| 989 Coiled-coil domain-containing protein 91                                      | Q7Z6B0  | 0.4108              | 0.6023     | -3.31               | 0.5752  | 0.8431              | -1.75  | 0.5661              | 0.7556     |
| 990 Coiled-coil domain-containing protein 93                                      | Q567V6  | 0.4108              | 0.6021     | -3.31               | 0.5752  | 0.8429              | -1.75  | 0.5661              | 0.7552     |
| 991 Coiled-coil domain-containing protein 97                                      | Q9BF63  | 0.3220              | 0.5260     | 0.13                | 0.7050  | 0.7828              | 0.07   | 0.2012              | 0.3529     |
| 992 Coiled-coil-helix-coiled-coil-helix domain-containing protein 5               | Q9BSY4  | 0.0217              | 0.0877     | 0.38                | 0.1314  | 0.4421              | 0.62   | 0.0028              | 0.0294     |
| 993 Cold shock domain-containing protein E1                                       | Q75534  | 0.0131              | 0.0669     | 0.35                | 0.8931  | 0.9241              | 0.01   | 0.0093              | 0.0448     |
| 994 Cold-inducible RNA-binding protein                                            | Q14011  | 0.0141              | 0.0695     | -0.27               | 0.2771  | 0.6642              | -0.12  | 0.0602              | 0.1419     |
| 995 Collagen alpha-1(V) chain                                                     | P20908  | 0.0450              | 0.1353     | 0.21                | 0.1457  | 0.6546              | 0.20   | 0.0011              | 0.0217     |
| 996 Collagen alpha-1(XVIII) chain                                                 | P39060  | 0.0268              | 0.0992     | -0.18               | 0.9442  | 0.9632              | 0.00   | 0.3454              | 0.5394     |
| 997 Collagen alpha-1(XIII) chain                                                  | Q86Y22  | 0.4328              | 0.5101     | -0.04               | 0.2829  | 0.6640              | 0.17   | 0.0849              | 0.1808     |
| 998 Collagen alpha-1(XVIII) chain                                                 | Q2UY09  | 0.1980              | 0.3675     | 0.16                | 0.0184  | 0.4627              | 0.33   | 0.1244              | 0.2432     |
| 999 Collagen alpha-2(XI) chain                                                    | P13942  | 0.0319              | 0.1110     | 5.48                | 0.0278  | 0.5053              | 5.44   | 0.0220              | 0.0646     |
| 1000 Collagen alpha-3(VI) chain                                                   | P12111  | 0.6725              | 0.7306     | -0.15               | 0.7550  | 0.8221              | 0.07   | 0.6277              | 0.6809     |
| 1001 Collagen alpha-5(VI) chain                                                   | AXTX70  | 0.4108              | 0.6020     | -3.31               | 0.5752  | 0.8426              | -1.75  | 0.5661              | 0.7550     |
| 1002 Collagen alpha-6(VI) chain                                                   | A6NMZ7  | 0.4108              | 0.6018     | -3.31               | 0.5752  | 0.8424              | -1.75  | 0.5661              | 0.7548     |
| 1003 Collagen triple helix repeat-containing protein 1                            | Q96C08  | 0.0031              | 0.0369     | 0.60                | 0.0100  | 0.4466              | 0.38   | 0.5044              | 0.7264     |
| 1004 Collagen type IV alpha-3-binding protein                                     | Q9Y5P4  | 0.0635              | 0.1669     | -1.56               | 0.0521  | 0.5791              | -10.00 | 0.0158              | 0.0594     |
| 1005 Collectrin                                                                   | Q9HBJ8  | 0.0330              | 0.1135     | 0.07                | 0.3340  | 0.6932              | 0.15   | 0.0187              | 0.0654     |
| 1006 COMM domain-containing protein 1                                             | Q8NG68  | 0.4108              | 0.6016     | -3.31               | 0.5752  | 0.8422              | -1.75  | 0.5661              | 0.7546     |
| 1007 COMM domain-containing protein 3                                             | Q9UB1L  | 0.9583              | 0.9690     | 0.01                | 0.5317  | 0.8501              | -0.17  | 0.0612              | 0.1436     |
| 1008 Complement C1q tumor necrosis factor-related protein 6                       | Q9BX19  | 0.0000              | 0.0000     | 3.75                | 0.0046  | 0.3504              | 1.71   | 0.0343              | 0.0963     |
| 1009 Complement C2                                                                | P06681  | 0.2451              | 0.4307     | -0.02               | 0.6029  | 0.7064              | 0.09   | 0.0263              | 0.0809     |
| 1010 Complement C3                                                                | P01024  | 0.4108              | 0.6015     | -3.31               | 0.5752  | 0.8419              | -1.75  | 0.5661              | 0.7544     |
| 1011 Complement C5                                                                | P01031  | 0.4108              | 0.6013     | -3.31               | 0.5752  | 0.8417              | -1.75  | 0.5661              | 0.7542     |
| 1012 Complement component 1 Q subcomponent-binding protein_mitochondrial          | Q07021  | 0.0305              | 0.1076     | 0.10                | 0.0079  | 0.4052              | 0.20   | 0.0002              | 0.0247     |
| 1013 Complement component C7                                                      | P10643  | 0.4108              | 0.6011     | -3.31               | 0.5752  | 0.8414              | -1.75  | 0.5661              | 0.7540     |
| 1014 Complement component receptor 1-like protein                                 | Q2VPA4  | 0.3252              | 0.5307     | 0.05                | 0.6198  | 0.7178              | 0.08   | 0.0061              | 0.0377     |
| 1015 Complement factor H                                                          | P08603  | 0.0924              | 0.2137     | 0.28                | 0.5427  | 0.8576              | -0.08  | 0.5450              | 0.7678     |
| 1016 Complex I assembly factor TIMMDC1_mitochondrial                              | Q9NPL8  | 0.0047              | 0.0434     | -0.17               | 0.3947  | 0.7384              | -0.08  | 0.3163              | 0.5590     |
| 1017 Complex I intermediate-associated protein 30_mitochondrial                   | Q9Y3Y5  | 0.0644              | 0.1681     | 0.17                | 0.6613  | 0.9000              | -0.01  | 0.7827              | 0.8217     |
| 1018 Complex III assembly factor LYRM7                                            | Q5USX0  | 0.9608              | 0.9711     | 0.00                | 0.8667  | 0.7326              | 0.05   | 0.1351              | 0.2580     |
| 1019 Complex-4                                                                    | Q14810  | 0.4108              | 0.6009     | -3.31               | 0.5752  | 0.8412              | -1.75  | 0.5661              | 0.7538     |
| 1020 Complex-4                                                                    | Q772G2  | 0.0003              | 0.0164     | 0.32                | 0.3753  | 0.7230              | 0.11   | 0.0004              | 0.0183     |
| 1021 Condensin complex subunit 1                                                  | Q15021  | 0.1888              | 0.3546     | 0.06                | 0.5741  | 0.8859              | -0.03  | 0.4851              | 0.7053     |
| 1022 Condensin complex subunit 2                                                  | Q15003  | 0.4108              | 0.6008     | -3.31               | 0.5752  | 0.8410              | -1.75  | 0.5661              | 0.7536     |
| 1023 Condensin complex subunit 3                                                  | Q9BFX3  | 0.0165              | 0.0750     | -0.15               | 0.2038  | 0.6598              | -0.17  | 0.8788              | 0.9041     |
| 1024 Condensin-2 complex subunit H2                                               | G6IBW4  | 0.4108              | 0.6006     | -3.31               | 0.5752  | 0.8407              | -1.75  | 0.5661              | 0.7534     |
| 1025 Connector enhancer of kinase suppressor of ras 1                             | Q969H4  | 0.1426              | 0.2891     | 0.06                | 0.1289  | 0.6433              | 0.33   | 0.2116              | 0.3663     |
| 1026 Connector enhancer of kinase suppressor of ras 2                             | Q8WX12  | 0.0246              | 0.0947     | 0.44                | 0.0107  | 0.4470              | 0.63   | 0.3436              | 0.5285     |
| 1027 Conserved oligomeric Golgi complex subunit 1                                 | Q8WWT3  | 0.2460              | 0.4315     | -0.12               | 0.2524  | 0.6620              | -0.15  | 0.0827              | 0.1771     |
| 1028 Conserved oligomeric Golgi complex subunit 2                                 | Q14746  | 0.3907              | 0.6076     | -0.05               | 0.0277  | 0.5088              | 0.33   | 0.1517              | 0.0591     |
| 1029 Conserved oligomeric Golgi complex subunit 4                                 | Q9H9E3  | 0.9927              | 0.9942     | 0.00                | 0.6613  | 0.7504              | 0.05   | 0.5277              | 0.7487     |
| 1030 Conserved oligomeric Golgi complex subunit 5                                 | Q9UP83  | 0.0142              | 0.0697     | -0.25               | 0.0129  | 0.4425              | -0.24  | 0.0477              | 0.1212     |
| 1031 Constitutive coactivator of peroxisome proliferator-activated receptor gamma | Q96EK7  | 0.1536              | 0.3052     | 0.08                | 0.1384  | 0.6511              | 0.21   | 0.0233              | 0.0753     |
| 1032 Constitutive coactivator of PPAR-gamma-like protein 1                        | Q9NZB2  | 0.1200              | 0.2556     | 0.12                | 0.1839  | 0.6634              | 0.27   | 0.0090              | 0.0443     |
| 1033 Contactin-associated protein-like 2                                          | Q9UHC6  | 0.4108              | 0.6004     | -3.31               | 0.5752  | 0.8405              | -1.75  | 0.5661              | 0.7532     |
| 1034 Contactin-associated protein-like 3                                          | Q9BZ76  | 0.0007              | 0.0212     | -0.79               | 0.8733  | 0.9084              | 0.03   | 0.0035              | 0.0310     |
| 1035 Contactin-associated protein-like 4                                          | Q9CDA0  | 0.0120              | 0.0632     | 0.31                | 0.1660  | 0.6599              | 0.27   | 0.0642              | 0.1478     |
| 1036 COP9 signalosome complex subunit 1                                           | Q13098  | 0.0374              | 0.1216     | 0.15                | 0.2162  | 0.6607              | 0.14   | 0.0695              | 0.1564     |
| 1037 COP9 signalosome complex subunit 2                                           | P61201  | 0.1133              | 0.2454     | 0.09                | 0.4045  | 0.7475              | 0.09   | 0.0739              | 0.1627     |
| 1038 COP9 signalosome complex subunit 3                                           | Q9UN52  | 0.1914              | 0.3579     | 0.13                | 0.4122  | 0.7524              | 0.09   | 0.1341              | 0.2565     |
| 1039 COP9 signalosome complex subunit 4                                           | Q9BT78  | 0.8667              | 0.8947     | 0.01                | 0.9557  | 0.9897              | 0.00   | 0.1650              | 0.3019     |
| 1040 COP9 signalosome complex subunit 5                                           | Q9Z905  | 0.1785              | 0.3414     | -0.06               | 0.0385  | 0.5571              | 0.12   | 0.8121              | 0.8478     |
| 1041 COP9 signalosome complex subunit 6                                           | Q7LSN1  | 0.0295              | 0.1052     | -0.15               | 0.0108  | 0.4371              | -0.25  | 0.0032              | 0.0305     |
| 1042 COP9 signalosome complex subunit 7a                                          | Q9UBW8  | 0.6692              | 0.7281     | -0.03               | 0.7457  | 0.8158              | 0.03   | 0.4090              | 0.6150     |
| 1043 COP9 signalosome complex subunit 8                                           | Q9P627  | 0.7604              | 0.8053     | 0.00                | 0.6781  | 0.7641              | -0.04  | 0.6677              | 0.7183     |
| 1044 Copme-1                                                                      | Q98299  | 0.4108              | 0.6003     | -3.31               | 0.5752  | 0.8403              | -1.75  | 0.5661              | 0.7531     |
| 1045 Copme-2                                                                      | Q96FN4  | 0.4108              | 0.6001     | -3.31               | 0.5752  | 0.8400              | -1.75  | 0.5661              | 0.7529     |
| 1046 Copme-3                                                                      | Q75131  | 0.0069              | 0.0497     | 0.25                | 0.4288  | 0.7641              | 0.10   | 0.4000              | 0.6030     |
| 1047 Copme-5                                                                      | Q9HHC1  | 0.7031              | 0.7559     | 0.12                | 0.1937  | 0.6600              | -0.80  | 0.0027              | 0.0285     |
| 1048 Copme-8                                                                      | Q86YQ8  | 0.4108              | 0.5999     | -3.31               | 0.5752  | 0.8398              | -1.75  | 0.5661              | 0.7527     |
| 1049 Copper transport protein ATOX1                                               | Q00244  | 0.0079              | 0.0527     | 0.08                | 0.6455  | 0.7381              | 0.03   | 0.0400              | 0.1065     |
| 1050 Cordan-blue protein-like 1                                                   | Q53SF7  | 0.9990              | 0.9992     | 0.00                | 0.9646  | 0.9757              | -0.01  | 0.1256              | 0.2450     |
| 1051 Coronin-1A                                                                   | P11146  | 0.0275              | 0.1005     | 0.25                | 0.7211  | 0.7959              | -0.05  | 0.0305              | 0.0888     |
| 1052 Coronin-1B                                                                   | Q9BR76  | 0.0045              | 0.0425     | -0.26               | 0.4745  | 0.8019              | -0.06  | 0.2525              | 0.4199     |
| 1053 Coronin-1C                                                                   | Q9ULV4  | 0.4108              | 0.5998     | -3.31               | 0.5752  | 0.8395              | -1.75  | 0.5661              | 0.7525     |
| 1054 Coronin-2A                                                                   | Q9Z828  | 0.4108              | 0.5996     | -3.31               | 0.5752  | 0.8393              | -1.75  | 0.5661              | 0.7523     |
| 1055 Coronin-7                                                                    | P57737  | 0.0436              | 0.1325     | 0.08                | 0.0818  | 0.6168              | 0.14   | 0.1183              | 0.2340     |
| 1056 Corrinoid adenosyltransferase                                                | Q96EY8  | 0.6646              | 0.7242     | -0.08               | 0.5687  | 0.8831              | -0.08  | 0.3958              | 0.5984     |
| 1057 Costars family protein ABRA1                                                 | Q9P1F3  | 0.3005              | 0.4997     | 0.10                | 0.9562  | 0.9710              | -0.01  | 0.9064              | 0.9262     |
| 1058 COX assembly mitochondrial protein 2 homolog                                 | Q9NRD2  | 0.0454              | 0.1360     | -2.32               | 0.2425  | 0.6601              | -0.57  | 0.1677              | 0.3269     |
| 1059 Coxsaekavirus and adenovirus receptor                                        | P78310  | 0.4108              | 0.5994     | -3.31               | 0.5752  | 0.8391              | -1.75  | 0.5661              | 0.7521     |
| 1060 Craniofacial development protein 1                                           | Q9UEE9  | 0.0070              | 0.0499     | -0.21               | 0.0354  | 0.5409              | -0.32  | 0.0195              | 0.0672     |
| 1061 Creatine kinase B-type                                                       | P12277  | 0.4108              | 0.5993     | -3.31               | 0.5752  | 0.8388              | -1.75  | 0.5661              | 0.7519     |

Supplementary Table S2. Overview on all relatively quantified 5180 proteins statistical analysis

|      | Protein name                                                   | UniProt   | MCF-7               |                     |                     |                     | MDA-MB-231          |                     |                     |                     |
|------|----------------------------------------------------------------|-----------|---------------------|---------------------|---------------------|---------------------|---------------------|---------------------|---------------------|---------------------|
|      |                                                                |           | Dai SC20 vs control | Gen SC20 vs control | SSE SC20 vs control | Dai IC20 vs control | Gen IC20 vs control | SSE IC20 vs control | Dai IC20 vs control | Gen IC20 vs control |
|      |                                                                |           | p value             | BH q value          | log2FC              | p value             | BH q value          | log2FC              | p value             | BH q value          |
| 1062 | Creatine kinase U-type mitochondrial                           | P12532    | 0.5304              | 0.6016              | 0.04                | 0.9321              | 0.9544              | 0.01                | 0.0321              | 0.0918              |
| 1063 | Crk-like protein                                               | P46109    | 0.1374              | 0.2821              | -0.10               | 0.3288              | 0.6882              | -0.05               | 0.0895              | 0.1878              |
| 1064 | Crooked-neck-like protein 1                                    | Q9BZ00    | 0.4108              | 0.5991              | -3.31               | 0.5752              | 0.8386              | -1.75               | 0.5661              | 0.7517              |
| 1065 | Cytochrome-c                                                   | Q949A0    | 0.4108              | 0.5989              | -3.31               | 0.5752              | 0.8384              | -1.75               | 0.5661              | 0.7515              |
| 1066 | CTST complex subunit STN1                                      | Q9H668    | 0.3965              | 0.6151              | -0.06               | 0.2452              | 0.6591              | -0.08               | 0.3054              | 0.4886              |
| 1067 | CTACF family member 2                                          | Q96R16    | 0.2325              | 0.4143              | -1.00               | 0.3713              | 0.7182              | -0.92               | 0.8406              | 0.8716              |
| 1068 | C-terminal-binding protein 1                                   | L13363    | 0.1900              | 0.3562              | -0.36               | 0.3793              | 0.7258              | -0.37               | 0.0598              | 0.1415              |
| 1069 | C-terminal-binding protein 2                                   | P56545    | 0.7069              | 0.7591              | -0.09               | 0.8334              | 0.8801              | 0.02                | 0.1304              | 0.2514              |
| 1070 | CTP synthase 1                                                 | P17812    | 0.0895              | 0.2091              | 0.19                | 0.3229              | 0.6852              | 0.21                | 0.1106              | 0.2215              |
| 1071 | CTP synthase 2                                                 | Q9NRF8    | 0.2046              | 0.3768              | -0.07               | 0.2815              | 0.6643              | -0.08               | 0.0344              | 0.0965              |
| 1072 | CTTNBP2 N-terminal-like protein                                | Q9P2B4    | 0.4108              | 0.5987              | -3.31               | 0.5752              | 0.8381              | -1.75               | 0.5661              | 0.7513              |
| 1073 | C-type lectin domain family 12 member A                        | Q5QGZ9    | 0.4108              | 0.5986              | -3.31               | 0.5752              | 0.8379              | -1.75               | 0.5661              | 0.7511              |
| 1074 | C-type lectin domain family 2 member B                         | Q92478    | 0.4108              | 0.5984              | -3.31               | 0.5752              | 0.8377              | -1.75               | 0.5661              | 0.7509              |
| 1075 | C-type lectin domain family 4 member A                         | Q9UHP7    | 0.0317              | 0.1105              | -0.29               | 0.1506              | 0.6594              | -0.98               | 0.0165              | 0.0609              |
| 1076 | C-type lectin domain family 4 member A                         | Q9UMR7    | 0.0945              | 0.2167              | 0.11                | 0.4078              | 0.7496              | 0.07                | 0.0164              | 0.0606              |
| 1077 | C-type lectin domain family 4 member D                         | Q8WXI8    | 0.6220              | 0.6852              | 0.02                | 0.8507              | 0.6209              | -0.16               | 0.4675              | 0.6849              |
| 1078 | C-type lectin domain family 4 member G                         | Q6UXB4    | 0.2871              | 0.4835              | -0.21               | 0.4300              | 0.7660              | -0.50               | 0.1615              | 0.2966              |
| 1079 | C-type mannose receptor 2                                      | Q9UBG0    | 0.4108              | 0.5982              | -3.31               | 0.5752              | 0.8374              | -1.75               | 0.5661              | 0.7507              |
| 1080 | CUB domain-containing protein 1                                | Q9H5V8    | 0.4108              | 0.5981              | -3.31               | 0.5752              | 0.8372              | -1.75               | 0.5661              | 0.7505              |
| 1081 | CUE domain-containing protein 1                                | Q9NWM3    | 0.2881              | 0.4845              | 0.15                | 0.1211              | 0.6388              | -0.45               | 0.0712              | 0.1591              |
| 1082 | CUGBP Elav-like family member 1                                | Q92879    | 0.0021              | 0.0317              | 1.15                | 0.0708              | 0.6002              | 0.23                | 0.3729              | 0.5711              |
| 1083 | Cullin-1                                                       | L13616    | 0.0766              | 0.1889              | -0.10               | 0.1148              | 0.6533              | 0.25                | 0.0013              | 0.0233              |
| 1084 | Cullin-2                                                       | L13617    | 0.0153              | 0.0717              | 0.15                | 0.7703              | 0.8334              | -0.03               | 0.7276              | 0.7709              |
| 1085 | Cullin-3                                                       | L13618    | 0.0345              | 0.1166              | 0.14                | 0.3341              | 0.6931              | 0.08                | 0.0201              | 0.0682              |
| 1086 | Cullin-4A                                                      | L13619    | 0.0036              | 0.0387              | 1.36                | 0.0562              | 0.7078              | 0.13                | 0.9770              | 0.9808              |
| 1087 | Cullin-4B                                                      | L13620    | 0.7008              | 0.7547              | 0.03                | 0.8781              | 0.6120              | 0.19                | 0.0513              | 0.1273              |
| 1088 | Cullin-5                                                       | Q93034    | 0.4108              | 0.5979              | -3.31               | 0.5752              | 0.8369              | -1.75               | 0.5661              | 0.7504              |
| 1089 | Cullin-associated NEDD8-dissociated protein 1                  | Q86VP6    | 0.0196              | 0.0823              | 0.20                | 0.2930              | 0.6698              | 0.20                | 0.0092              | 0.0448              |
| 1090 | Cullin-associated NEDD8-dissociated protein 2                  | Q75155    | 0.5203              | 0.5921              | 0.07                | 0.0376              | 0.5549              | -0.46               | 0.0477              | 0.1211              |
| 1091 | CWF19-like protein 2                                           | Q2TBE0    | 0.0320              | 0.1111              | 0.36                | 0.0736              | 0.3139              | -0.36               | 0.9986              | 0.9990              |
| 1092 | XXXX motif containing zinc binding protein                     | Q9NWW4    | 0.2249              | 0.4035              | -0.05               | 0.1240              | 0.6417              | -0.08               | 0.9504              | 0.9608              |
| 1093 | XXXX-type zinc finger protein 1                                | Q9PU04    | 0.8934              | 0.9166              | -0.01               | 0.3671              | 0.7157              | 0.15                | 0.6370              | 0.6899              |
| 1094 | Cyclic AMP-responsive element-binding protein 3-like protein 4 | Q8TEY5    | 0.4108              | 0.5977              | -3.31               | 0.5752              | 0.8367              | -1.75               | 0.5661              | 0.7502              |
| 1095 | Cyclic nucleotide-gated cation channel alpha-3                 | Q16281    | 0.0351              | 0.1170              | 0.24                | 0.0551              | 0.5861              | 0.18                | 0.6919              | 0.7400              |
| 1096 | Cyclic nucleotide-gated cation channel alpha-4                 | Q8V777    | 0.0206              | 0.0848              | 0.73                | 0.3295              | 0.6888              | -0.38               | 0.3348              | 0.2568              |
| 1097 | Cyclin-dependent kinase 1                                      | P06493    | 0.1070              | 0.2356              | 0.10                | 0.4832              | 0.8072              | -0.08               | 0.0281              | 0.0847              |
| 1098 | Cyclin-dependent kinase 12                                     | Q9NYY4    | 0.4108              | 0.5986              | -3.31               | 0.5752              | 0.8365              | -1.75               | 0.5661              | 0.7500              |
| 1099 | Cyclin-dependent kinase 13                                     | Q14004    | 0.0000              | 0.0000              | 0.42                | 0.1683              | 0.6610              | 0.24                | 0.0025              | 0.0276              |
| 1100 | Cyclin-dependent kinase 15                                     | Q96A00    | 0.0054              | 0.0447              | 0.28                | 0.6567              | 0.7470              | 0.02                | 0.6038              | 0.6596              |
| 1101 | Cyclin-dependent kinase 16                                     | Q00536    | 0.4194              | 0.4970              | 0.09                | 0.2189              | 0.6600              | -0.20               | 0.6991              | 0.7464              |
| 1102 | Cyclin-dependent kinase 17                                     | Q00537    | 0.4108              | 0.5974              | -3.31               | 0.5752              | 0.8362              | -1.75               | 0.5661              | 0.7498              |
| 1103 | Cyclin-dependent kinase 18                                     | Q07002    | 0.1597              | 0.3148              | -0.94               | 0.3458              | 0.7030              | 0.49                | 0.2047              | 0.3576              |
| 1104 | Cyclin-dependent kinase 21                                     | P24941    | 0.8417              | 0.8736              | -0.02               | 0.4143              | 0.6540              | 0.21                | 0.4727              | 0.6901              |
| 1105 | Cyclin-dependent kinase 3                                      | Q00526    | 0.3788              | 0.5946              | 0.03                | 0.6444              | 0.7375              | 0.04                | 0.2943              | 0.4748              |
| 1106 | Cyclin-dependent kinase 4                                      | P11802    | 0.0104              | 0.0591              | -0.77               | 0.0241              | 0.4876              | -0.69               | 0.0061              | 0.0380              |
| 1107 | Cyclin-dependent kinase 6                                      | Q00534    | 0.0186              | 0.0801              | -1.41               | 0.7114              | 0.7884              | 0.11                | 0.0363              | 0.0998              |
| 1108 | Cyclin-dependent kinase 9                                      | P50750    | 0.0475              | 0.1480              | -0.20               | 0.6228              | 0.5893              | -0.20               | 0.8823              | 0.9072              |
| 1109 | Cyclin-dependent kinase inhibitor 1                            | P38936    | 0.0008              | 0.0214              | -1.21               | 0.1171              | 0.6332              | -0.38               | 0.4863              | 0.7064              |
| 1110 | Cyclin-dependent kinase inhibitor 3                            | Q16667    | 0.8249              | 0.8598              | -0.01               | 0.7070              | 0.6011              | 0.35                | 0.0967              | 0.1992              |
| 1111 | Cyclin-dependent kinase-5                                      | Q76039    | 0.0173              | 0.0770              | -0.25               | 0.2071              | 0.6637              | 0.07                | 0.4170              | 0.6243              |
| 1112 | Cyclin-dependent kinases regulatory subunit 1                  | P61024    | 0.1536              | 0.3051              | 0.23                | 0.1611              | 0.6649              | 0.36                | 0.0341              | 0.0958              |
| 1113 | Cyclin-dependent kinase 5                                      | Q00535    | 0.2664              | 0.4582              | 0.07                | 0.2811              | 0.6655              | -0.12               | 0.2760              | 0.4503              |
| 1114 | Cyclin-K                                                       | Q75909    | 0.0008              | 0.0213              | -0.36               | 0.0202              | 0.4735              | -0.34               | 0.0646              | 0.1483              |
| 1115 | Cystathionine beta-synthase                                    | P35520    | 0.4108              | 0.5972              | -3.31               | 0.5752              | 0.8360              | -1.75               | 0.5661              | 0.7496              |
| 1116 | Cystathionine beta-synthase-like protein                       | P0DN79    | 0.0149              | 0.0709              | 0.35                | 0.0881              | 0.6201              | 0.23                | 0.0594              | 0.1410              |
| 1117 | Cytosin-B                                                      | P04080    | 0.4050              | 0.6253              | 0.02                | 0.4666              | 0.8034              | -0.10               | 0.8208              | 0.8550              |
| 1118 | Cytosin-C                                                      | P01034    | 0.0129              | 0.0664              | -0.40               | 0.1662              | 0.4586              | 0.32                | 0.0127              | 0.0529              |
| 1119 | Cysteine and glycine-rich protein 1                            | P21291    | 0.5006              | 0.5742              | -0.40               | 0.4189              | 0.7576              | 0.08                | 0.7902              | 0.8279              |
| 1120 | Cysteine and glycine-rich protein 2                            | Q16527    | 0.3552              | 0.5658              | 0.06                | 0.4114              | 0.7517              | 0.10                | 0.4320              | 0.6425              |
| 1121 | Cysteine and histidine-rich domain-containing protein 1        | Q9UHD1    | 0.1561              | 0.3091              | 0.06                | 0.2735              | 0.6648              | -0.04               | 0.1920              | 0.3393              |
| 1122 | Cysteine and histidine-rich protein 1                          | Q6ZMK1    | 0.9976              | 0.9980              | 0.00                | 0.1571              | 0.6616              | -0.37               | 0.2634              | 0.4336              |
| 1123 | Cysteine dioxygenase type 1                                    | Q16878    | 0.4108              | 0.5971              | -3.31               | 0.5752              | 0.8358              | -1.75               | 0.5661              | 0.7494              |
| 1124 | Cysteine protease ATG4B                                        | Q9Y4P1    | 0.0345              | 0.1165              | 0.07                | 0.0222              | 0.4812              | 0.19                | 0.3712              | 0.5694              |
| 1125 | Cysteine protease ATG4C                                        | Q96D76    | 0.4108              | 0.5969              | -3.31               | 0.5752              | 0.8355              | -1.75               | 0.5661              | 0.7492              |
| 1126 | Cysteine protease ATG4D                                        | Q86T10    | 0.9785              | 0.9857              | 0.00                | 0.9490              | 0.9660              | 0.02                | 0.5464              | 0.7693              |
| 1127 | Cysteine/serine-rich nuclear protein 3                         | Q8WYX3    | 0.4108              | 0.5967              | -3.31               | 0.5752              | 0.8353              | -1.75               | 0.5661              | 0.7490              |
| 1128 | Cysteine-rich protein 1                                        | P50238    | 0.4108              | 0.5966              | -3.31               | 0.5752              | 0.8351              | -1.75               | 0.5661              | 0.7488              |
| 1129 | Cysteine-rich protein 2                                        | P52943    | 0.6844              | 0.7404              | -0.03               | 0.2396              | 0.6612              | 0.27                | 0.1302              | 0.2512              |
| 1130 | Cysteine-rich with EGF-like domain protein 2                   | Q6U390    | 0.0330              | 0.1134              | 0.15                | 0.1302              | 0.6448              | 0.16                | 0.0071              | 0.0440              |
| 1131 | Cysteine-RNA ligase, cytoplasmic                               | P49589    | 0.0828              | 0.1981              | 0.25                | 0.1353              | 0.6501              | 0.22                | 0.0004              | 0.0199              |
| 1132 | Cytochrome b-245 light chain                                   | P13498    | 0.1529              | 0.3409              | 0.09                | 0.0976              | 0.6335              | -0.19               | 0.0038              | 0.0320              |
| 1133 | Cytochrome b5                                                  | P00167    | 0.2813              | 0.4746              | 0.11                | 0.1170              | 0.6333              | 0.30                | 0.3417              | 0.5347              |
| 1134 | Cytochrome b5 type B                                           | Q43169    | 0.2907              | 0.4878              | -0.05               | 0.6542              | 0.7448              | 0.05                | 0.2726              | 0.4663              |
| 1135 | Cytochrome b561                                                | P49447    | 0.0011              | 0.0232              | -0.46               | 0.9505              | 0.9671              | 0.00                | 0.0407              | 0.0333              |
| 1136 | Cytochrome b-c1 complex subunit 1 mitochondrial                | P31930    | 0.0402              | 0.1264              | 0.14                | 0.3109              | 0.6792              | 0.15                | 0.0050              | 0.0344              |
| 1137 | Cytochrome b-c1 complex subunit 2 mitochondrial                | P22695    | 0.0350              | 0.1168              | 0.13                | 0.4314              | 0.7677              | 0.12                | 0.0201              | 0.0681              |
| 1138 | Cytochrome b-c1 complex subunit 6 mitochondrial                | P07919    | 0.0008              | 0.0211              | -0.26               | 0.3456              | 0.7029              | -0.39               | 0.0001              | 0.0144              |
| 1139 | Cytochrome b-c1 complex subunit 7-like mitochondrial           | AD0961P55 | 0.1143              | 0.2472              | 0.09                | 0.3046              | 0.6775              | 0.17                | 0.0043              | 0.0323              |
| 1140 | Cytochrome b-c1 complex subunit 7                              | P14927    | 0.0643              | 0.1680              | 0.07                | 0.0553              | 0.7485              | 0.10                | 0.0029              | 0.0293              |
| 1141 | Cytochrome b-c1 complex subunit 9                              | Q9UDW1    | 0.4580              | 0.5349              | 0.02                | 0.6298              | 0.7266              | 0.06                | 0.0065              | 0.0388              |
| 1142 | Cytochrome b-c1 complex subunit Rieske mitochondrial           | P47985    | 0.8435              | 0.8751              | 0.01                | 0.8022              | 0.8571              | -0.02               | 0.8338              | 0.1791              |
| 1143 | Cytochrome c                                                   | P99999    | 0.0075              | 0.0511              | 0.26                | 0.3221              | 0.6841              | 0.04                | 0.0016              | 0.0231              |





Supplementary Table S2. Overview on all relatively quantified 5180 proteins statistical analysis

| Protein name                                                                                                          | UniProt | MCF-7               |            |        |                     |            |        | MDA-MB-231          |            |        |                     |            |        |
|-----------------------------------------------------------------------------------------------------------------------|---------|---------------------|------------|--------|---------------------|------------|--------|---------------------|------------|--------|---------------------|------------|--------|
|                                                                                                                       |         | Dai SC20 vs control |            |        | Gen SC20 vs control |            |        | Dai IC20 vs control |            |        | Gen IC20 vs control |            |        |
|                                                                                                                       |         | p value             | BH q value | log2FC | p value             | BH q value | log2FC | p value             | BH q value | log2FC | p value             | BH q value | log2FC |
| 1223 Dehydrogenase/reductase SDR family member 7B                                                                     | Q6IAN0  | 0.6020              | 0.6677     | 0.02   | 0.1948              | 0.6691     | 0.19   | 0.0332              | 0.0942     | 0.12   | 0.0038              | 0.0249     | 0.24   |
| 1224 Delphin                                                                                                          | A4D2P6  | 0.4375              | 0.5152     | -0.07  | 0.2471              | 0.6581     | -0.52  | 0.0018              | 0.0238     | 0.72   | 0.0170              | 0.0545     | 0.36   |
| 1225 Delta(14)-sterol reductase                                                                                       | Q14739  | 0.4108              | 0.5946     | -3.31  | 0.5752              | 0.8323     | -1.75  | 0.5661              | 0.7465     | -1.19  | 0.5388              | 0.7057     | 0.89   |
| 1226 Delta(24)-sterol reductase                                                                                       | Q15392  | 0.7753              | 0.8169     | 0.27   | 0.0970              | 0.6336     | -1.41  | 0.0026              | 0.0282     | -1.36  | 0.7434              | 0.7789     | 0.31   |
| 1227 Delta(3, 5)-Delta(2, 4)-dienoyl-CoA isomerase_mitochondrial                                                      | P13011  | 0.1139              | 0.2465     | 0.04   | 0.3993              | 0.7430     | 0.09   | 0.1424              | 0.2684     | -0.05  | 0.0415              | 0.1010     | 0.06   |
| 1228 Delta-1-pyrroline-5-carboxylate dehydrogenase_mitochondrial                                                      | P30038  | 0.0010              | 0.0225     | -0.47  | 0.0077              | 0.4029     | -0.26  | 0.0025              | 0.0280     | -0.60  | 0.0006              | 0.0130     | -0.52  |
| 1229 Delta-1-pyrroline-5-carboxylate synthase                                                                         | P54886  | 0.1143              | 0.2471     | -0.14  | 0.4756              | 0.8025     | 0.05   | 0.0336              | 0.0949     | -0.22  | 0.7301              | 0.7671     | 0.02   |
| 1230 Delta-aminolevulinic acid dehydratase                                                                            | P13716  | 0.1217              | 0.2583     | -0.11  | 0.3318              | 0.6911     | 0.09   | 0.1845              | 0.3293     | -0.09  | 0.5627              | 0.6127     | -0.03  |
| 1231 DENN domain-containing protein 2A                                                                                | Q9ULE3  | 0.0796              | 0.1935     | 0.68   | 0.2066              | 0.6598     | 0.14   | 0.0085              | 0.0436     | 0.19   | 0.0000              | 0.0000     | 0.40   |
| 1232 DENN domain-containing protein 2C                                                                                | Q68D51  | 0.1413              | 0.2870     | -0.30  | 0.2994              | 0.6737     | 0.17   | 0.0654              | 0.1495     | 0.40   | 0.6079              | 0.6552     | 0.08   |
| 1233 DENN domain-containing protein 2D                                                                                | Q9H6A0  | 0.0014              | 0.0258     | -0.41  | 0.0434              | 0.5720     | 0.28   | 0.1458              | 0.2730     | -0.21  | 0.0109              | 0.0419     | -0.22  |
| 1234 DENN domain-containing protein 4C                                                                                | Q5VZ89  | 0.1483              | 0.2968     | 0.10   | 0.2181              | 0.6607     | 0.08   | 0.4573              | 0.6724     | 0.07   | 0.0181              | 0.0567     | -0.23  |
| 1235 Density-regulated protein                                                                                        | O43583  | 0.2545              | 0.4421     | 0.20   | 0.5169              | 0.8386     | -0.32  | 0.0646              | 0.1483     | -0.74  | 0.1850              | 0.3124     | -0.66  |
| 1236 Deoxycytidine kinase                                                                                             | P27707  | 0.0103              | 0.0591     | -0.56  | 0.0154              | 0.4585     | -0.23  | 0.0211              | 0.0704     | -0.19  | 0.0030              | 0.0224     | -0.58  |
| 1237 Deoxycytidine deaminase                                                                                          | P32321  | 0.0035              | 0.0384     | -0.46  | 0.0179              | 0.4707     | -0.40  | 0.0069              | 0.0399     | -0.52  | 0.0138              | 0.0477     | -0.54  |
| 1238 Deoxycytidine synthase                                                                                           | P49366  | 0.0068              | 0.0493     | -0.35  | 0.5428              | 0.8575     | -0.07  | 0.0040              | 0.0318     | -0.45  | 0.0476              | 0.1112     | -0.17  |
| 1239 Deoxynucleoside triphosphate triphosphohydrolase SAMHD1                                                          | Q9Y323  | 0.0436              | 0.1324     | -0.05  | 0.1919              | 0.6671     | -0.06  | 0.1859              | 0.3311     | 0.02   | 0.0040              | 0.0255     | -0.12  |
| 1240 Deoxyribonuclease-2-alpha                                                                                        | O00115  | 0.9952              | 0.9958     | 0.00   | 0.0003              | 0.1943     | 0.24   | 0.0148              | 0.0573     | 0.30   | 0.0046              | 0.0275     | 0.20   |
| 1241 Deoxyribose-phosphate aldolase                                                                                   | Q9Y315  | 0.4108              | 0.5944     | -3.31  | 0.5752              | 0.8320     | -1.75  | 0.5661              | 0.7463     | -1.19  | 0.5388              | 0.7055     | 0.89   |
| 1242 Deoxycytidine 5'-triphosphate nucleotidohydrolase_mitochondrial                                                  | P33316  | 0.1150              | 0.2484     | 0.10   | 0.4737              | 0.8014     | 0.07   | 0.0171              | 0.0621     | 0.21   | 0.0574              | 0.1274     | 0.14   |
| 1243 Dertin-1                                                                                                         | Q9BLN8  | 0.3008              | 0.4999     | -0.02  | 0.6381              | 0.7335     | 0.04   | 0.0896              | 0.1878     | -0.08  | 0.7673              | 0.7997     | -0.01  |
| 1244 Desmin                                                                                                           | P17661  | 0.5019              | 0.5754     | -0.03  | 0.2438              | 0.6584     | 0.14   | 0.5812              | 0.6381     | 0.05   | 0.8731              | 0.8910     | -0.01  |
| 1245 Desmoglein-1                                                                                                     | Q02413  | 0.0750              | 0.1862     | 0.14   | 0.4575              | 0.7897     | -0.03  | 0.0476              | 0.1210     | 0.18   | 0.0028              | 0.0216     | 0.22   |
| 1246 Desmoglein-2                                                                                                     | Q14126  | 0.1801              | 0.3436     | -1.02  | 0.3131              | 0.6806     | -0.35  | 0.2348              | 0.3957     | 0.24   | 0.0616              | 0.1344     | -0.92  |
| 1247 Desmoplakin                                                                                                      | P15924  | 0.0029              | 0.0364     | 0.20   | 0.0299              | 0.5062     | 0.13   | 0.0189              | 0.0658     | 0.34   | 0.0006              | 0.0124     | 0.30   |
| 1248 Destrin                                                                                                          | P60981  | 0.0337              | 0.1147     | 0.21   | 0.4472              | 0.7823     | 0.12   | 0.2584              | 0.4270     | 0.10   | 0.0530              | 0.1201     | 0.15   |
| 1249 Deuterosome assembly protein 1                                                                                   | Q0SD60  | 0.1682              | 0.3269     | -0.05  | 0.0620              | 0.5904     | 0.33   | 0.0724              | 0.1608     | 0.04   | 0.6762              | 0.7169     | 0.01   |
| 1250 Developmentally-regulated GTP-binding protein 1                                                                  | Q9Y295  | 0.6253              | 0.6887     | -0.06  | 0.2650              | 0.6628     | -0.19  | 0.0539              | 0.1318     | -0.38  | 0.0456              | 0.1078     | -0.44  |
| 1251 Developmentally-regulated GTP-binding protein 2                                                                  | P55039  | 0.4108              | 0.5942     | -3.31  | 0.5752              | 0.8318     | -1.75  | 0.5661              | 0.7462     | -1.19  | 0.5388              | 0.7053     | 0.89   |
| 1252 Diabolo homolog_mitochondrial                                                                                    | Q9NR28  | 0.2759              | 0.4693     | 0.05   | 0.4196              | 0.7579     | 0.09   | 0.0490              | 0.1233     | -0.12  | 0.0216              | 0.0638     | 0.07   |
| 1253 Diacylglycerol kinase theta                                                                                      | P52824  | 0.4108              | 0.5941     | -3.31  | 0.5752              | 0.8316     | -1.75  | 0.5661              | 0.7460     | -1.19  | 0.5388              | 0.7052     | 0.89   |
| 1254 Diacylglycerol O-acyltransferase 2                                                                               | Q96PD7  | 0.0081              | 0.0533     | 1.46   | 0.9951              | 0.9970     | 0.01   | 0.0236              | 0.0754     | 0.88   | 0.0053              | 0.0292     | 1.45   |
| 1255 Diacylglycerol acetyltransferase 1                                                                               | P21673  | 0.1638              | 0.3305     | -0.65  | 0.3558              | 0.7078     | -1.26  | 0.0797              | 0.1721     | -1.01  | 0.0421              | 0.1021     | -1.18  |
| 1256 Differentially expressed in FDCP 6 homolog                                                                       | Q9H4E7  | 0.1378              | 0.2826     | 0.08   | 0.2329              | 0.6629     | 0.22   | 0.0071              | 0.0399     | 0.32   | 0.0035              | 0.0238     | 0.33   |
| 1257 Digestive organ expansion factor homolog                                                                         | Q68CQ4  | 0.4108              | 0.5939     | -3.31  | 0.5752              | 0.8313     | -1.75  | 0.5661              | 0.7458     | -1.19  | 0.5388              | 0.7050     | 0.89   |
| 1258 Dihydrofolate reductase                                                                                          | P00374  | 0.4758              | 0.5513     | -0.20  | 0.7022              | 0.7848     | -0.12  | 0.2458              | 0.4114     | 0.13   | 0.8836              | 0.9005     | 0.01   |
| 1259 Dihydrofoloyl dehydrogenase_mitochondrial                                                                        | P09622  | 0.0864              | 0.2044     | 0.19   | 0.1027              | 0.6311     | 0.32   | 0.0290              | 0.0865     | 0.29   | 0.0179              | 0.0564     | 0.37   |
| 1260 Dihydrofoloyl-synase-residue acetyltransferase component of pyruvate dehydrogenase complex_mitochondrial         | P10515  | 0.4108              | 0.5937     | -3.31  | 0.5752              | 0.8311     | -1.75  | 0.5661              | 0.7456     | -1.19  | 0.5388              | 0.7048     | 0.89   |
| 1261 Dihydrofoloyl-synase-residue succinyltransferase component of 2-oxoglutarate dehydrogenase complex_mitochondrial | P36957  | 0.1993              | 0.3696     | 0.06   | 0.3248              | 0.6856     | 0.08   | 0.0155              | 0.0586     | 0.17   | 0.0656              | 0.1412     | 0.11   |
| 1262 Dihydroorotate dehydrogenase (quinone)_mitochondrial                                                             | Q02127  | 0.3997              | 0.6192     | -0.06  | 0.2287              | 0.6600     | -0.10  | 0.0087              | 0.0438     | -0.33  | 0.6615              | 0.7042     | 0.03   |
| 1263 Dihydroteridine reductase                                                                                        | P09417  | 0.4108              | 0.5936     | -3.31  | 0.5752              | 0.8309     | -1.75  | 0.5661              | 0.7454     | -1.19  | 0.5388              | 0.7046     | 0.89   |
| 1264 Dihydroxymethylase-related protein 1                                                                             | Q14194  | 0.0507              | 0.1457     | -0.73  | 0.4133              | 0.7522     | -1.57  | 0.0289              | 0.0863     | -0.43  | 0.0499              | 0.1149     | -1.11  |
| 1265 Dihydroxymethylase-related protein 2                                                                             | P16555  | 0.1889              | 0.3547     | 0.14   | 0.4442              | 0.9630     | -0.01  | 0.0568              | 0.1362     | 0.25   | 0.1200              | 0.2230     | 0.18   |
| 1266 Dihydroxymethylase-related protein 3                                                                             | Q14195  | 0.4108              | 0.5944     | -3.31  | 0.5752              | 0.8306     | -1.75  | 0.5661              | 0.7452     | -1.19  | 0.5388              | 0.7044     | 0.89   |
| 1267 Dihydroxymethylase-related protein 4                                                                             | Q14531  | 0.9360              | 0.9516     | -0.01  | 0.0763              | 0.6156     | 0.43   | 0.1987              | 0.3495     | 0.17   | 0.0237              | 0.1213     | 0.32   |
| 1268 Dihydroxymethylase-related protein 5                                                                             | Q9BP06  | 0.1651              | 0.3224     | -0.07  | 0.4041              | 0.7375     | -0.07  | 0.1287              | 0.2494     | -0.10  | 0.0307              | 0.0815     | -0.17  |
| 1269 Dipetidase 2                                                                                                     | Q9H4A9  | 0.4860              | 0.5604     | -0.17  | 0.5684              | 0.8302     | -0.40  | 0.1496              | 0.6275     | 0.23   | 0.6752              | 0.7161     | -0.11  |
| 1270 Dipetidyl peptidase 1                                                                                            | P53634  | 0.6346              | 0.6964     | -0.04  | 0.4277              | 0.7629     | 0.08   | 0.3363              | 0.5285     | 0.09   | 0.3399              | 0.5139     | 0.07   |
| 1271 Dipetidyl peptidase 2                                                                                            | Q9UHL4  | 0.0347              | 0.1166     | 0.20   | 0.0043              | 0.3480     | 0.23   | 0.2546              | 0.4227     | 0.10   | 0.1027              | 0.1978     | 0.12   |
| 1272 Dipetidyl peptidase 3                                                                                            | Q9NY33  | 0.0196              | 0.0822     | 0.14   | 0.1948              | 0.6696     | 0.22   | 0.0048              | 0.0337     | 0.24   | 0.0013              | 0.0167     | 0.31   |
| 1273 Diposphomevalonate decarboxylase                                                                                 | P53602  | 0.4319              | 0.5094     | 0.06   | 0.8288              | 0.8769     | -0.03  | 0.5629              | 0.7872     | 0.03   | 0.3077              | 0.4747     | -0.06  |
| 1274 DIS3-like exonuclease 1                                                                                          | Q8TF46  | 0.0194              | 0.0818     | 0.20   | 0.5014              | 0.8230     | -0.05  | 0.1791              | 0.3225     | 0.12   | 0.0626              | 0.1363     | -0.14  |
| 1275 DIS3-like exonuclease 2                                                                                          | Q7HBY7  | 0.4124              | 0.4904     | -0.09  | 0.1693              | 0.6619     | 0.11   | 0.2082              | 0.3618     | 0.27   | 0.1012              | 0.1957     | 0.13   |
| 1276 Discoidin CUB and LCC domain-containing protein 2                                                                | Q96PD2  | 0.4108              | 0.5932     | -3.31  | 0.5752              | 0.8304     | -1.75  | 0.5661              | 0.7450     | -1.19  | 0.5388              | 0.7043     | 0.89   |
| 1277 Disco-interacting protein 2 homolog B                                                                            | Q9P265  | 0.2712              | 0.4639     | -0.04  | 0.4992              | 0.8220     | -0.07  | 0.9747              | 0.9789     | 0.00   | 0.0143              | 0.0486     | -0.19  |
| 1278 Dishevelled-associated activator of morphogenesis 1                                                              | Q9Y4D1  | 0.0820              | 0.1973     | 0.12   | 0.1293              | 0.6434     | -0.51  | 0.0004              | 0.0201     | -0.17  | 0.0014              | 0.0174     | -0.78  |
| 1279 Dishevelled-associated activator of morphogenesis 2                                                              | Q86T65  | 0.0022              | 0.0324     | 0.36   | 0.0422              | 0.5722     | 0.52   | 0.0014              | 0.0231     | 0.55   | 0.0319              | 0.0839     | 0.39   |
| 1280 Disintegrin and metalloproteinase domain-containing protein 10                                                   | O14672  | 0.4108              | 0.5931     | -3.31  | 0.5752              | 0.8302     | -1.75  | 0.5661              | 0.7448     | -1.19  | 0.5388              | 0.7041     | 0.89   |
| 1281 Disintegrin and metalloproteinase domain-containing protein 17                                                   | P78536  | 0.0959              | 0.2185     | -9.28  | 0.9593              | 0.9724     | 0.08   | 0.0318              | 0.0913     | -7.16  | 0.0861              | 0.1736     | 1.74   |
| 1282 Disintegrin and metalloproteinase domain-containing protein 22                                                   | Q9P0K1  | 0.5040              | 0.5771     | 0.05   | 0.2877              | 0.6683     | -0.45  | 0.0110              | 0.0486     | 0.32   | 0.0018              | 0.0186     | 0.46   |
| 1283 Disintegrin and metalloproteinase domain-containing protein 7                                                    | Q9H2U9  | 0.0334              | 0.1143     | -1.19  | 0.7651              | 0.8300     | 0.17   | 0.0299              | 0.0877     | -0.85  | 0.3019              | 0.4671     | -0.24  |
| 1284 Disintegrin and metalloproteinase domain-containing protein 9                                                    | Q13443  | 0.4108              | 0.5929     | -3.31  | 0.5752              | 0.8300     | -1.75  | 0.5661              | 0.7446     | -1.19  | 0.5388              | 0.7039     | 0.89   |
| 1285 Disks large homolog 1                                                                                            | Q12959  | 0.1527              | 0.3038     | 0.12   | 0.1899              | 0.6696     | 0.19   | 0.8363              | 0.8681     | 0.02   | 0.3546              | 0.5323     | 0.06   |
| 1286 Disks large homolog 2                                                                                            | Q15700  | 0.3103              | 0.5114     | 0.30   | 0.4835              | 0.8084     | 0.29   | 0.3939              | 0.5961     | -0.23  | 0.2786              | 0.4365     | 0.31   |
| 1287 Disks large homolog 5                                                                                            | Q8TDM6  | 0.0149              | 0.0709     | 0.25   | 0.0072              | 0.4054     | 0.19   | 0.0007              | 0.0213     | 0.32   | 0.8751              | 0.8929     | 0.00   |

Supplementary Table S2. Overview on all relatively quantified 5180 proteins statistical analysis

|      | Protein name                                               | UniProt | MCF-7               |                     |                     | MDA-MB-231          |                     |                     |
|------|------------------------------------------------------------|---------|---------------------|---------------------|---------------------|---------------------|---------------------|---------------------|
|      |                                                            |         | Dai SC20 vs control | Gen SC20 vs control | SSE SC20 vs control | Dai IC20 vs control | Gen IC20 vs control | SSE IC20 vs control |
|      |                                                            |         | p value             | BH q value          | log2FC              | p value             | BH q value          | log2FC              |
| 1288 | Disks large-associated protein 3                           | Q95886  | 0.0009              | 0.0222              | -0.46               | 0.0430              | 0.5697              | -0.50               |
| 1289 | Disks large-associated protein 5                           | Q15398  | 0.4108              | 0.5927              | -3.31               | 0.5752              | 0.8297              | -1.75               |
| 1290 | Dixin                                                      | Q155Q3  | 0.0158              | 0.0731              | 0.23                | 0.4242              | 0.7609              | 0.04                |
| 1291 | DNA (cytosine-5)-methyltransferase 1                       | P26358  | 0.0005              | 0.0190              | 0.19                | 0.1257              | 0.6428              | 0.15                |
| 1292 | DNA (cytosine-5)-methyltransferase 3-like                  | Q9U1W3  | 0.4108              | 0.5926              | -3.31               | 0.5752              | 0.8295              | -1.75               |
| 1293 | DNA damage-binding protein 1                               | Q16531  | 0.1104              | 0.2413              | 0.07                | 0.1705              | 0.6606              | 0.21                |
| 1294 | DNA damage-induced apoptosis suppressor protein            | Q8IXT1  | 0.0010              | 0.0234              | -0.62               | 0.0506              | 0.5735              | -0.20               |
| 1295 | DNA dC→dU-editing enzyme APOBEC-3B                         | Q9UHI7  | 0.4108              | 0.5924              | -3.31               | 0.5752              | 0.8293              | -1.75               |
| 1296 | DNA dC→dU-editing enzyme APOBEC-3C                         | Q9NRW3  | 0.0005              | 0.0189              | 0.22                | 0.4148              | 0.6998              | 0.89                |
| 1297 | DNA dC→dU-editing enzyme APOBEC-3G                         | Q9HC16  | 0.4108              | 0.5922              | -3.31               | 0.5752              | 0.8290              | -1.75               |
| 1298 | DNA endonuclease RBBP8                                     | Q99708  | 0.1049              | 0.2321              | 0.97                | 0.0316              | 0.5099              | 1.11                |
| 1299 | DNA excision repair protein ERCC-6                         | Q03468  | 0.0528              | 0.1491              | 0.16                | 0.2901              | 0.6685              | 0.21                |
| 1300 | DNA excision repair protein ERCC-6-like                    | Q2NKC8  | 0.4108              | 0.5921              | -3.31               | 0.5752              | 0.8288              | -1.75               |
| 1301 | DNA fragmentation factor subunit alpha                     | Q00273  | 0.0753              | 0.1867              | 0.09                | 0.6027              | 0.7063              | 0.07                |
| 1302 | DNA helicase MCM8                                          | Q9U1A3  | 0.1236              | 0.2611              | 0.10                | 0.2346              | 0.6612              | -0.10               |
| 1303 | DNA ligase 1                                               | P18858  | 0.4108              | 0.5919              | -3.31               | 0.5752              | 0.8286              | -1.75               |
| 1304 | DNA polymerase delta 1-associated protein 1                | Q9NPFS  | 0.3612              | 0.5739              | 0.08                | 0.1016              | 0.6310              | 0.29                |
| 1305 | DNA mismatch repair protein Msh2                           | P43246  | 0.0422              | 0.1303              | 0.21                | 0.0464              | 0.5629              | 0.24                |
| 1306 | DNA mismatch repair protein Msh3                           | P20585  | 0.4108              | 0.5918              | -3.31               | 0.5752              | 0.8283              | -1.75               |
| 1307 | DNA mismatch repair protein Msh6                           | P52701  | 0.0566              | 0.1558              | 0.08                | 0.2812              | 0.6648              | 0.18                |
| 1308 | DNA polymerase alpha catalytic subunit                     | P09884  | 0.9325              | 0.9486              | -0.01               | 0.8427              | 0.8872              | 0.03                |
| 1309 | DNA polymerase beta                                        | P06746  | 0.4108              | 0.5916              | -3.31               | 0.5752              | 0.8281              | -1.75               |
| 1310 | DNA polymerase delta catalytic subunit                     | P28400  | 0.4108              | 0.5914              | -3.31               | 0.5752              | 0.8279              | -1.75               |
| 1311 | DNA polymerase delta subunit 2                             | P99905  | 0.0825              | 0.1979              | -0.10               | 0.8498              | 0.8922              | 0.02                |
| 1312 | DNA polymerase delta subunit 3                             | Q15054  | 0.4108              | 0.5913              | -3.31               | 0.5752              | 0.8276              | -1.75               |
| 1313 | DNA polymerase epsilon catalytic subunit A                 | Q07864  | 0.0150              | 0.0710              | 0.15                | 0.0355              | 0.5393              | 0.17                |
| 1314 | DNA polymerase epsilon subunit 3                           | Q9NRF9  | 0.0006              | 0.0202              | 0.56                | 0.0914              | 0.6288              | 0.32                |
| 1315 | DNA polymerase epsilon subunit 4                           | Q9NR33  | 0.0249              | 0.0953              | -0.57               | 0.2076              | 0.6585              | -0.60               |
| 1316 | DNA polymerase kappa                                       | Q9UBT6  | 0.2107              | 0.3836              | -0.04               | 0.0010              | 0.2252              | 0.38                |
| 1317 | DNA polymerase zeta catalytic subunit                      | Q06073  | 0.4108              | 0.5911              | -3.31               | 0.5752              | 0.8274              | -1.75               |
| 1318 | DNA primase small subunit                                  | P49642  | 0.1557              | 0.3084              | -0.14               | 0.6181              | 0.7172              | 0.06                |
| 1319 | DNA repair and recombination protein RAD54-like            | Q92698  | 0.2621              | 0.4521              | -0.12               | 0.3584              | 0.7083              | -0.13               |
| 1320 | DNA repair protein complementing XP-G cells                | P28715  | 0.0608              | 0.1634              | -0.18               | 0.0059              | 0.3869              | -0.24               |
| 1321 | DNA repair protein RAD50                                   | Q92878  | 0.9632              | 0.9730              | -0.01               | 0.5183              | 0.8393              | -0.25               |
| 1322 | DNA repair protein RAD51 homolog 1                         | Q06609  | 0.0590              | 0.1607              | 0.60                | 0.4366              | 0.7727              | -0.16               |
| 1323 | DNA repair protein REV1                                    | Q9UBZ9  | 0.0028              | 0.0357              | 0.24                | 0.0707              | 0.6004              | 0.31                |
| 1324 | DNA repair protein XRCC1                                   | P18887  | 0.0004              | 0.0173              | -0.28               | 0.5570              | 0.8714              | -0.02               |
| 1325 | DNA repair protein XRCC2                                   | Q43543  | 0.4108              | 0.5908              | -3.31               | 0.5752              | 0.8272              | -1.75               |
| 1326 | DNA repair protein XRCC4                                   | Q13426  | 0.4108              | 0.5908              | -3.31               | 0.5752              | 0.8270              | -1.75               |
| 1327 | DNA replication ATP-dependent helicase/nuclease DNA2       | P51530  | 0.0063              | 0.0478              | 0.15                | 0.0642              | 0.5928              | 0.56                |
| 1328 | DNA replication complex GINS protein PSF1                  | Q14691  | 0.0259              | 0.0974              | 0.37                | 0.0271              | 0.5031              | 0.36                |
| 1329 | DNA replication complex GINS protein PSF2                  | Q9Y248  | 0.4217              | 0.4991              | -0.09               | 0.0623              | 0.5901              | -0.28               |
| 1330 | DNA replication complex GINS protein PSF3                  | Q9BRX5  | 0.0684              | 0.1738              | -0.25               | 0.2541              | 0.6624              | -2.98               |
| 1331 | DNA replication complex GINS protein SLD5                  | Q9BRT9  | 0.4108              | 0.5906              | -3.31               | 0.5752              | 0.8267              | -1.75               |
| 1332 | DNA replication licensing factor MCM2                      | P49736  | 0.0742              | 0.1848              | 0.07                | 0.2141              | 0.6625              | 0.12                |
| 1333 | DNA replication licensing factor MCM3                      | P25205  | 0.1173              | 0.2519              | -0.09               | 0.0974              | 0.7175              | 0.00                |
| 1334 | DNA replication licensing factor MCM4                      | P33991  | 0.8318              | 0.8656              | 0.01                | 0.2551              | 0.6620              | 0.15                |
| 1335 | DNA replication licensing factor MCM5                      | P33992  | 0.4254              | 0.5029              | 0.01                | 0.2151              | 0.6616              | 0.15                |
| 1336 | DNA replication licensing factor MCM6                      | Q14566  | 0.1117              | 0.2428              | 0.08                | 0.1179              | 0.6309              | 0.29                |
| 1337 | DNA replication licensing factor MCM7                      | P33993  | 0.1308              | 0.2725              | 0.09                | 0.3858              | 0.7310              | 0.12                |
| 1338 | DNA topoisomerase 1                                        | P11387  | 0.4803              | 0.5550              | 0.03                | 0.4778              | 0.8033              | -0.11               |
| 1339 | DNA topoisomerase 2-alpha                                  | P11388  | 0.4108              | 0.5904              | -3.31               | 0.5752              | 0.8265              | -1.75               |
| 1340 | DNA topoisomerase 2-beta                                   | Q02880  | 0.4108              | 0.5903              | -3.31               | 0.5752              | 0.8263              | -1.75               |
| 1341 | DNA topoisomerase 2-alpha                                  | Q13472  | 0.3646              | 0.5777              | 0.12                | 0.8716              | 0.9072              | 0.02                |
| 1342 | DNA topoisomerase 1 mitochondrial                          | Q06906  | 0.1455              | 0.2932              | 0.08                | 0.5578              | 0.8711              | 0.09                |
| 1343 | DNA-(apurinic or apyrimidinic site) lyase                  | P27695  | 0.0009              | 0.0021              | 0.28                | 0.1866              | 0.6666              | 0.32                |
| 1344 | DNA-3-methyladenine glycosylase                            | P9372   | 0.0236              | 0.0924              | -0.30               | 0.2024              | 0.2438              | 0.43                |
| 1345 | DNA-binding protein SATB2                                  | Q9UPW6  | 0.0041              | 0.0405              | 0.97                | 0.8986              | 0.9282              | 0.03                |
| 1346 | DNA-dependent protein kinase catalytic subunit             | P78527  | 0.0030              | 0.0368              | 0.16                | 0.1623              | 0.6615              | 0.20                |
| 1347 | DNA-directed RNA polymerase II subunit RPB2                | P30876  | 0.0040              | 0.0401              | 0.59                | 0.2730              | 0.6652              | 0.01                |
| 1348 | DNA-directed RNA polymerase II subunit RPC5                | Q9NVU0  | 0.4108              | 0.5901              | -3.31               | 0.5752              | 0.8260              | -1.75               |
| 1349 | DNA-directed RNA polymerase III subunit RPC9               | Q75575  | 0.0007              | 0.0211              | -0.40               | 0.3575              | 0.7084              | -0.16               |
| 1350 | DNA-directed RNA polymerases I and III subunit RPAC1       | Q15160  | 0.3511              | 0.5606              | -0.21               | 0.6778              | 0.7641              | -0.08               |
| 1351 | DNA-directed RNA polymerases I, II, and III subunit RPABC1 | P19388  | 0.0568              | 0.1563              | -12.68              | 0.0473              | 0.5685              | -11.12              |
| 1352 | DNA-directed RNA polymerases I, II, and III subunit RPABC3 | P52434  | 0.0039              | 0.0397              | 0.15                | 0.2929              | 0.6704              | 0.25                |
| 1353 | DnaI homolog subfamily A member 1                          | P31689  | 0.1343              | 0.2777              | 0.09                | 0.5484              | 0.8642              | 0.06                |
| 1354 | DnaI homolog subfamily A member 2                          | Q60884  | 0.9300              | 0.9472              | 0.00                | 0.6998              | 0.7787              | 0.02                |
| 1355 | DnaI homolog subfamily A member 3 mitochondrial            | Q96Y11  | 0.4108              | 0.5899              | -3.31               | 0.5752              | 0.8258              | -1.75               |
| 1356 | DnaI homolog subfamily A member 4                          | Q8WW22  | 0.2244              | 0.4030              | -0.24               | 0.2187              | 0.6606              | -2.34               |
| 1357 | DnaI homolog subfamily B member 1                          | P25685  | 0.5034              | 0.5768              | 0.01                | 0.6936              | 0.7745              | 0.02                |
| 1358 | DnaI homolog subfamily B member 11                         | Q9UBS4  | 0.0232              | 0.0911              | 0.20                | 0.0790              | 0.6126              | 0.28                |
| 1359 | DnaI homolog subfamily B member 12                         | Q9NXW2  | 0.2553              | 0.4432              | -0.09               | 0.3518              | 0.7041              | -0.11               |
| 1360 | DnaI homolog subfamily B member 3                          | Q8WWF6  | 0.4108              | 0.5898              | -3.31               | 0.5752              | 0.8256              | -1.75               |
| 1361 | DnaI homolog subfamily B member 4                          | Q9UDY4  | 0.3552              | 0.5656              | 0.11                | 0.6516              | 0.7431              | -0.22               |
| 1362 | DnaI homolog subfamily B member 6                          | Q75190  | 0.4108              | 0.5896              | -3.31               | 0.5752              | 0.8254              | -1.75               |
| 1363 | DnaI homolog subfamily B member 9                          | Q9UBS3  | 0.4108              | 0.5895              | -3.31               | 0.5752              | 0.8251              | -1.75               |
| 1364 | DnaI homolog subfamily C member 10                         | Q8IXB1  | 0.2223              | 0.3989              | -0.09               | 0.4282              | 0.7633              | -0.06               |
| 1365 | DnaI homolog subfamily C member 13                         | Q75165  | 0.1809              | 0.3446              | 0.12                | 0.4478              | 0.7826              | 0.11                |
| 1366 | DnaI homolog subfamily C member 2                          | Q99543  | 0.0033              | 0.0379              | 0.26                | 0.1070              | 0.6306              | 0.24                |
| 1367 | DnaI homolog subfamily C member 21                         | Q5F1R6  | 0.9519              | 0.9646              | 0.00                | 0.3196              | 0.6824              | 0.17                |

Supplementary Table S2. Overview on all relatively quantified 5180 proteins statistical analysis

| Protein name                                                                      | UniProt | MCF-7               |            |                     |         | MDA-MB-231          |        |                     |            |
|-----------------------------------------------------------------------------------|---------|---------------------|------------|---------------------|---------|---------------------|--------|---------------------|------------|
|                                                                                   |         | Dai SC20 vs control |            | Gen SC20 vs control |         | Dai IC20 vs control |        | Gen IC20 vs control |            |
|                                                                                   |         | p value             | BH q value | log2FC              | p value | BH q value          | log2FC | p value             | BH q value |
| 1368 DnaI homolog subfamily C member 3                                            | Q13217  | 0.4108              | 0.5893     | -3.31               | 0.5752  | 0.8249              | -1.75  | 0.5661              | 0.7405     |
| 1369 DnaI homolog subfamily C member 7                                            | Q9615   | 0.0389              | 0.1240     | 0.07                | 0.1046  | 0.6330              | 0.25   | 0.0015              | 0.0231     |
| 1370 DnaI homolog subfamily C member 8                                            | Q75937  | 0.0720              | 0.1805     | 0.15                | 0.1944  | 0.6687              | 0.18   | 0.1529              | 0.2839     |
| 1371 DnaI homolog subfamily C member 9                                            | Q8WXX5  | 0.0005              | 0.0188     | 0.43                | 0.2432  | 0.6603              | 0.28   | 0.0070              | 0.0398     |
| 1372 DnaI-type zinc finger protein                                                | Q5SXM8  | 0.0050              | 0.2015     | 0.05                | 0.2960  | 0.6719              | 0.11   | 0.0721              | 0.1603     |
| 1373 Docking protein 5                                                            | Q9P104  | 0.4108              | 0.5891     | -3.31               | 0.5752  | 0.8247              | -1.75  | 0.5661              | 0.7403     |
| 1374 Dolichol-phosphate mannosyltransferase subunit 1                             | O60762  | 0.0023              | 0.0329     | 0.21                | 0.3978  | 0.7420              | 0.15   | 0.3657              | 0.5629     |
| 1375 Dolichol-phosphate mannosyltransferase subunit 3                             | Q9P2X0  | 0.6144              | 0.6789     | 0.05                | 0.1641  | 0.6636              | 0.23   | 0.0380              | 0.1027     |
| 1376 Dolichyl-diphosphooligosaccharide-protein glycosyltransferase 48 kDa subunit | P39656  | 0.0149              | 0.0708     | 0.20                | 0.3702  | 0.7185              | -0.07  | 0.0262              | 0.0808     |
| 1377 Dolichyl-diphosphooligosaccharide-protein glycosyltransferase subunit 1      | P04843  | 0.0047              | 0.0433     | 0.22                | 0.2295  | 0.6612              | 0.26   | 0.0013              | 0.0227     |
| 1378 Dolichyl-diphosphooligosaccharide-protein glycosyltransferase subunit 2      | P04844  | 0.0016              | 0.0274     | 0.14                | 0.0975  | 0.6337              | 0.11   | 0.0001              | 0.0192     |
| 1379 Dolichyl-diphosphooligosaccharide-protein glycosyltransferase subunit DAD1   | P61803  | 0.7990              | 0.8371     | 0.02                | 0.0447  | 0.5675              | -0.23  | 0.3867              | 0.5879     |
| 1380 Dolichyl-diphosphooligosaccharide-protein glycosyltransferase subunit STT3A  | P46977  | 0.0093              | 0.0572     | 0.21                | 0.2163  | 0.6602              | 0.21   | 0.0034              | 0.0311     |
| 1381 Dolichyl-diphosphooligosaccharide-protein glycosyltransferase subunit STT3B  | Q8TCJ2  | 0.4108              | 0.5890     | -3.31               | 0.5752  | 0.8244              | -1.75  | 0.5661              | 0.7401     |
| 1382 Dol-P-Man:Man5GlcNAc(2)-PP-Dol alpha-1,3-mannosyltransferase                 | Q9Y673  | 0.1657              | 0.3232     | -0.15               | 0.6466  | 0.7386              | 0.07   | 0.0455              | 0.1174     |
| 1383 Double-strand break repair protein MRE11A                                    | Q92685  | 0.4236              | 0.5010     | 0.11                | 0.2689  | 0.6630              | 0.13   | 0.0201              | 0.0682     |
| 1384 Doublecortin domain-containing protein 1                                     | MOR2J8  | 0.4108              | 0.5888     | -3.31               | 0.5752  | 0.8242              | -1.75  | 0.5661              | 0.7399     |
| 1385 Doublecortin domain-containing protein 2B                                    | A2VCK2  | 0.4108              | 0.5886     | -3.31               | 0.5752  | 0.8240              | -1.75  | 0.5661              | 0.7398     |
| 1386 Doublecortin domain-containing protein 2C                                    | ARMY07  | 0.4108              | 0.5885     | -3.31               | 0.5752  | 0.8238              | -1.75  | 0.5661              | 0.7396     |
| 1387 Double-strand break repair protein MRE11A                                    | P49959  | 0.4108              | 0.5883     | -3.31               | 0.5752  | 0.8235              | -1.75  | 0.5661              | 0.7394     |
| 1388 Double-stranded RNA-binding protein Staufen homolog 1                        | O95793  | 0.2389              | 0.4237     | -0.04               | 0.2574  | 0.6624              | 0.04   | 0.1236              | 0.2419     |
| 1389 Double-stranded RNA-binding protein Staufen homolog 2                        | Q9NUL3  | 0.8040              | 0.8417     | 0.01                | 0.9324  | 0.9543              | 0.00   | 0.8896              | 0.9120     |
| 1390 Double-stranded RNA-specific adenosine deaminase                             | P55265  | 0.9201              | 0.9391     | -0.01               | 0.1460  | 0.6548              | 0.14   | 0.9677              | 0.9735     |
| 1391 Drebrin-like protein                                                         | Q16643  | 0.5328              | 0.6035     | 0.04                | 0.4582  | 0.7901              | 0.12   | 0.0990              | 0.2025     |
| 1392 DTF domain-containing protein 2                                              | Q9U1U6  | 0.0157              | 0.0729     | 0.17                | 0.1116  | 0.6304              | 0.21   | 0.0247              | 0.0780     |
| 1393 Dual oxidase 2                                                               | Q9N1A8  | 0.0210              | 0.0858     | -0.19               | 0.3520  | 0.7040              | -0.15  | 0.3083              | 0.4924     |
| 1394 Dual oxidase 2                                                               | Q9NRD8  | 0.4108              | 0.5882     | -3.31               | 0.5752  | 0.8233              | -1.75  | 0.5661              | 0.7392     |
| 1395 Dual serine/threonine and tyrosine protein kinase                            | Q6LUX3  | 0.5273              | 0.5987     | -0.06               | 0.2731  | 0.6651              | 0.16   | 0.0352              | 0.0977     |
| 1396 Dual specificity mitogen-activated protein kinase kinase 1                   | Q02750  | 0.1893              | 0.3553     | -0.09               | 0.9087  | 0.9365              | 0.01   | 0.5735              | 0.6311     |
| 1397 Dual specificity mitogen-activated protein kinase kinase 2                   | P36507  | 0.0036              | 0.0386     | -0.38               | 0.6685  | 0.7561              | -0.03  | 0.2428              | 0.4074     |
| 1398 Dual specificity mitogen-activated protein kinase kinase 3                   | P46734  | 0.0132              | 0.0670     | -0.12               | 0.0412  | 0.5676              | 0.29   | 0.0739              | 0.1628     |
| 1399 Dual specificity mitogen-activated protein kinase kinase 4                   | P45985  | 0.1113              | 0.2424     | 0.05                | 0.9525  | 0.9686              | 0.01   | 0.4753              | 0.6933     |
| 1400 Dual specificity protein kinase TTK                                          | P33981  | 0.4108              | 0.5880     | -3.31               | 0.5752  | 0.8231              | -1.75  | 0.5661              | 0.7390     |
| 1401 Dual specificity protein phosphatase 3                                       | P51452  | 0.0132              | 0.0670     | 3.16                | 0.0799  | 0.6123              | -8.09  | 0.0078              | 0.0418     |
| 1402 Dynactin subunit 1                                                           | Q14203  | 0.0070              | 0.0498     | 0.21                | 0.1258  | 0.6426              | 0.33   | 0.0068              | 0.0398     |
| 1403 Dynactin subunit 2                                                           | Q13561  | 0.0181              | 0.0790     | 0.19                | 0.1018  | 0.4305              | 0.19   | 0.0179              | 0.0639     |
| 1404 Dynactin subunit 4                                                           | Q9U1U0  | 0.0349              | 0.1168     | -0.13               | 0.4495  | 0.7840              | -0.08  | 0.0751              | 0.1646     |
| 1405 Dynactin subunit 5                                                           | Q9BTE1  | 0.1198              | 0.2556     | 0.21                | 0.5321  | 0.8499              | 0.05   | 0.0141              | 0.0556     |
| 1406 Dynamin-1                                                                    | Q05193  | 0.0098              | 0.0582     | 0.32                | 0.6089  | 0.7110              | 0.08   | 0.1684              | 0.3075     |
| 1407 Dynamin-1-like protein                                                       | Q00429  | 0.0053              | 0.0445     | 0.29                | 0.0476  | 0.7500              | 0.13   | 0.0075              | 0.0409     |
| 1408 Dynamin-2                                                                    | P50570  | 0.3096              | 0.5106     | 0.04                | 0.1838  | 0.6644              | 0.21   | 0.0213              | 0.0707     |
| 1409 Dynamin-3                                                                    | Q9ULQ16 | 0.0071              | 0.0497     | 9.51                | 0.5792  | 0.8862              | -1.75  | 0.5661              | 0.7900     |
| 1410 Dynamin-like 120 kDa protein mitochondrial                                   | O60313  | 0.0086              | 0.0549     | 0.16                | 0.1899  | 0.6705              | 0.24   | 0.0015              | 0.0227     |
| 1411 Dynein assembly factor 1 axonemal                                            | Q8NEP3  | 0.1349              | 0.2785     | -0.27               | 0.2258  | 0.6590              | -0.77  | 0.4357              | 0.6465     |
| 1412 Dynein assembly factor 5 axonemal                                            | Q86Y56  | 0.0030              | 0.0367     | 0.44                | 0.1786  | 0.6646              | 0.36   | 0.0055              | 0.0360     |
| 1413 Dynein heavy chain 1 axonemal                                                | Q9P2D7  | 0.4108              | 0.5878     | -3.31               | 0.5752  | 0.8228              | -1.75  | 0.5661              | 0.7388     |
| 1414 Dynein heavy chain 10 axonemal                                               | Q8IVF4  | 0.1101              | 0.2408     | 0.12                | 0.2787  | 0.6647              | 0.13   | 0.0061              | 0.0378     |
| 1415 Dynein heavy chain 12 axonemal                                               | Q6ZK08  | 0.0824              | 0.1978     | 0.08                | 0.1417  | 0.6576              | -0.09  | 0.0119              | 0.0511     |
| 1416 Dynein heavy chain 14 axonemal                                               | Q0VDD8  | 0.0433              | 0.1321     | 0.19                | 0.1472  | 0.6539              | 0.10   | 0.0025              | 0.0277     |
| 1417 Dynein heavy chain 17 axonemal                                               | Q9UFH2  | 0.0180              | 0.0788     | -0.50               | 0.2573  | 0.6631              | -0.35  | 0.0186              | 0.0654     |
| 1418 Dynein heavy chain 2 axonemal                                                | Q9P225  | 0.0089              | 0.0561     | 0.21                | 0.2745  | 0.6644              | 0.13   | 0.0339              | 0.0954     |
| 1419 Dynein heavy chain 3 axonemal                                                | Q8TE57  | 0.4108              | 0.5877     | -3.31               | 0.5752  | 0.8226              | -1.75  | 0.5661              | 0.7386     |
| 1420 Dynein heavy chain 5 axonemal                                                | Q8TD73  | 0.1883              | 0.3543     | 0.12                | 0.0637  | 0.5924              | 0.12   | 0.0762              | 0.1664     |
| 1421 Dynein heavy chain 7 axonemal                                                | Q9UC66  | 0.5448              | 0.6144     | -0.03               | 0.6063  | 0.7086              | 0.05   | 0.0713              | 0.1592     |
| 1422 Dynein heavy chain 8 axonemal                                                | Q8WXX0  | 0.1814              | 0.3450     | -1.46               | 0.2304  | 0.6616              | -0.71  | 0.1813              | 0.0648     |
| 1423 Dynein heavy chain 9 axonemal                                                | Q6YB1   | 0.0004              | 0.0017     | -0.33               | 0.0001  | 0.2590              | -0.42  | 0.0730              | 0.5711     |
| 1424 Dynein heavy chain domain-containing protein 1                               | Q9NYC9  | 0.4108              | 0.5875     | -3.31               | 0.5752  | 0.8224              | -1.75  | 0.5661              | 0.7385     |
| 1425 Dynein heavy chain 12 axonemal                                               | Q96M86  | 0.3639              | 0.5768     | 0.10                | 0.1985  | 0.6647              | 0.17   | 0.0560              | 0.7799     |
| 1426 Dynein light chain 1 cytoplasmic                                             | P63167  | 0.0052              | 0.0442     | 0.18                | 0.0408  | 0.5681              | 0.40   | 0.0013              | 0.0236     |
| 1427 Dynein light chain 2 cytoplasmic                                             | Q96FJ2  | 0.0555              | 0.1541     | 0.07                | 0.0038  | 0.3281              | -0.33  | 0.0005              | 0.0221     |
| 1428 Dynein light chain roadblock-type 1                                          | Q9NP97  | 0.4108              | 0.5873     | -3.31               | 0.5752  | 0.8222              | -1.75  | 0.5661              | 0.7383     |
| 1429 Dynein light chain roadblock-type 2                                          | Q8TF09  | 0.0057              | 0.0456     | 0.37                | 0.0368  | 0.5999              | 0.13   | 0.0320              | 0.0917     |
| 1430 Dynein light chain Tctex-type 1                                              | P63172  | 0.0610              | 0.1635     | -0.56               | 0.7611  | 0.8272              | 0.05   | 0.1910              | 0.3380     |
| 1431 Dynein light chain Tctex-type 3                                              | P51808  | 0.4108              | 0.5872     | -3.31               | 0.5752  | 0.8219              | -1.75  | 0.5661              | 0.7381     |
| 1432 Dynein regulatory complex protein 8                                          | Q5VUJ9  | 0.3025              | 0.5021     | 0.06                | 0.7577  | 0.8244              | -0.02  | 0.0016              | 0.0228     |
| 1433 Dynein regulatory complex protein 9                                          | Q9H095  | 0.0185              | 0.0801     | -0.25               | 0.5780  | 0.6869              | 0.09   | 0.2215              | 0.3787     |
| 1434 Dyx1in                                                                       | Q03001  | 0.4108              | 0.5870     | -3.31               | 0.5752  | 0.8217              | -1.75  | 0.5661              | 0.7379     |
| 1435 Dyx1robrein alpha                                                            | Q9Y4J8  | 0.0613              | 0.1638     | -1.52               | 0.1789  | 0.6676              | -1.32  | 0.1971              | 0.3469     |
| 1436 Dyx1robrein beta                                                             | O60941  | 0.4108              | 0.5869     | -3.31               | 0.5752  | 0.8215              | -1.75  | 0.5661              | 0.7377     |
| 1437 Dyx1robrin                                                                   | Q14118  | 0.5868              | 0.6535     | -0.04               | 0.2420  | 0.6598              | -0.22  | 0.0145              | 0.0566     |
| 1438 Dyx1robrin                                                                   | P11532  | 0.9445              | 0.9582     | 0.00                | 0.3865  | 0.7294              | 0.11   | 0.0081              | 0.0423     |

Supplementary Table S2. Overview on all relatively quantified 5180 proteins statistical analysis

| Protein name                                       | UniProt    | MCF-7               |                     |                     |                     | MDA-MB-231          |                     |                     |                     |            |        |        |       |        |        |       |        |        |       |        |        |       |        |        |       |        |        |       |
|----------------------------------------------------|------------|---------------------|---------------------|---------------------|---------------------|---------------------|---------------------|---------------------|---------------------|------------|--------|--------|-------|--------|--------|-------|--------|--------|-------|--------|--------|-------|--------|--------|-------|--------|--------|-------|
|                                                    |            | Dai SC20 vs control | Gen SC20 vs control | SSE SC20 vs control | Dai IC20 vs control | Gen IC20 vs control | SSE IC20 vs control | Dai IC20 vs control | SSE IC20 vs control |            |        |        |       |        |        |       |        |        |       |        |        |       |        |        |       |        |        |       |
| p value                                            | BH q value | log2FC              | p value             | BH q value          | log2FC              | p value             | BH q value          | log2FC              | p value             | BH q value | log2FC |        |       |        |        |       |        |        |       |        |        |       |        |        |       |        |        |       |
| 1439 E1A-binding protein p400                      | Q96L91     | 0.3134              | 0.5149              | -0.11               | 0.2900              | 0.6685              | 0.17                | 0.0329              | 0.0935              | 0.28       | 0.2982 | 0.4622 | 0.13  | 0.1019 | 0.2559 | 0.19  | 0.5410 | 0.7729 | 0.09  | 0.3736 | 0.4575 | -2.55 | 0.8708 | 0.9549 | -0.33 | 0.0651 | 0.1225 | 2.06  |
| 1440 EF2-associated phosphoprotein                 | Q56P03     | 0.0164              | 0.0748              | 0.34                | 0.1310              | 0.6680              | 0.34                | 0.0267              | 0.0818              | 0.38       | 0.0161 | 0.0527 | 0.31  | 0.7182 | 0.7786 | 0.002 | 0.0463 | 0.1429 | 0.23  | 0.3736 | 0.5642 | -2.55 | 0.8708 | 1.1495 | -0.33 | 0.0651 | 0.1727 | 2.06  |
| 1441 E3 SUMO-protein ligase PIA3                   | Q9Y6X2     | 0.0045              | 0.0425              | 0.39                | 0.0217              | 0.4783              | 0.34                | 0.8821              | 0.9071              | -0.01      | 0.0045 | 0.0271 | 0.45  | 0.0261 | 0.1168 | 0.24  | 0.0251 | 0.1007 | 0.28  | 0.3736 | 0.5859 | -2.55 | 0.8708 | 1.1880 | -0.33 | 0.0651 | 0.1847 | 2.06  |
| 1442 E3 SUMO-protein ligase RanBP2                 | P49792     | 0.2505              | 0.4368              | 0.03                | 0.3178              | 0.6808              | 0.13                | 0.0046              | 0.0333              | 0.27       | 0.0084 | 0.0371 | 0.17  | 0.1356 | 0.3054 | 0.05  | 0.0056 | 0.0616 | 0.23  | 0.3736 | 0.1793 | 0.37  | 0.9861 | 0.9899 | 0.00  | 0.2923 | 0.3541 | 0.04  |
| 1443 E3 ubiquitin-ITG15 ligase TRIM25              | Q14258     | 0.00189             | 0.0010              | 0.20                | 0.3924              | 0.7362              | 0.12                | 0.0393              | 0.1053              | 0.14       | 0.0103 | 0.0408 | 0.24  | 0.5753 | 0.4548 | -0.02 | 0.0130 | 0.0764 | 0.23  | 0.0992 | 0.2544 | 0.24  | 0.217  | 0.5202 | -0.13 | 0.6698 | 0.7234 | -0.04 |
| 1444 E3 ubiquitin-protein ligase ARIH1             | Q9Y4X3     | 0.5926              | 0.6992              | -0.07               | 0.0296              | 0.5077              | -0.37               | 0.0742              | 0.1631              | -0.28      | 0.5726 | 0.6222 | -0.06 | 0.2799 | 0.5061 | -0.13 | 0.3217 | 0.5349 | 0.21  | 0.3736 | 0.4783 | -2.55 | 0.8708 | 0.9936 | -0.33 | 0.0651 | 0.1313 | 2.06  |
| 1445 E3 ubiquitin-protein ligase ARIH2             | Q95376     | 0.0242              | 0.0935              | -0.21               | 0.1279              | 0.6414              | -0.26               | 0.0133              | 0.0232              | -0.50      | 0.1003 | 0.1946 | -0.24 | 0.5564 | 0.6398 | -0.13 | 0.1126 | 0.2539 | -0.37 | 0.3736 | 0.5305 | -2.55 | 0.8708 | 1.0890 | -0.33 | 0.0651 | 0.1553 | 2.06  |
| 1446 E3 ubiquitin-protein ligase BRE1A             | Q5VTR2     | 0.0025              | 0.0339              | 0.21                | 0.2161              | 0.6616              | 0.19                | 0.0002              | 0.0170              | 0.51       | 0.0020 | 0.0200 | 0.29  | 0.0008 | 0.0220 | 0.28  | 0.0009 | 0.0476 | 0.59  | 0.1610 | 0.3543 | 0.22  | 0.2288 | 0.5419 | 0.12  | 0.3348 | 0.4059 | -0.08 |
| 1447 E3 ubiquitin-protein ligase BRE1B             | Q75150     | 0.0304              | 0.1075              | 0.16                | 0.0561              | 0.5847              | 0.20                | 0.0108              | 0.0486              | 0.28       | 0.0051 | 0.0288 | 0.36  | 0.0004 | 0.0170 | 0.59  | 0.5333 | 0.1562 | 0.14  | 0.1011 | 0.2573 | 0.35  | 0.4792 | 0.8900 | -0.08 | 0.3560 | 0.6019 | -0.09 |
| 1448 E3 ubiquitin-protein ligase CBL               | P22681     | 0.4108              | 0.5867              | -3.31               | 0.5752              | 0.8213              | -1.75               | 0.5661              | 0.7375              | -1.19      | 0.5388 | 0.6972 | 0.89  | 0.2938 | 0.4812 | -1.88 | 0.9510 | 1.1165 | 0.09  | 0.0446 | 0.1697 | 0.31  | 0.0032 | 0.0467 | 0.82  | 0.9119 | 0.9295 | -0.01 |
| 1449 E3 ubiquitin-protein ligase CHIP              | Q9UNE7     | 0.1042              | 0.2310              | 0.06                | 0.4397              | 0.7758              | -0.03               | 0.0038              | 0.0314              | -0.18      | 0.0521 | 0.1185 | 0.15  | 0.0174 | 0.0948 | -0.12 | 0.0373 | 0.1249 | 0.24  | 0.0586 | 0.1925 | 0.31  | 0.0136 | 0.0604 | 1.85  | 0.4012 | 0.7159 | 3.99  |
| 1450 E3 ubiquitin-protein ligase DCST1             | Q5T197     | 0.9551              | 0.9665              | 0.00                | 0.4714              | 0.8003              | 0.13                | 0.0918              | 0.1910              | 0.11       | 0.0945 | 0.1860 | 0.11  | 0.3313 | 0.4285 | -0.05 | 0.0921 | 0.0931 | 0.00  | 0.3736 | 0.4295 | -2.55 | 0.8708 | 0.9021 | -0.33 | 0.0651 | 0.1114 | 2.06  |
| 1451 E3 ubiquitin-protein ligase HECTD1            | Q9ULT8     | 0.3624              | 0.5753              | -0.05               | 0.1991              | 0.6645              | -0.21               | 0.0039              | 0.0318              | -0.32      | 0.0076 | 0.0353 | -0.26 | 0.0097 | 0.0707 | -0.28 | 0.0276 | 0.1066 | -0.23 | 0.3736 | 0.5831 | -2.55 | 0.8708 | 1.1830 | -0.33 | 0.0651 | 0.1831 | 2.06  |
| 1452 E3 ubiquitin-protein ligase HECTD3            | Q5T447     | 0.2494              | 0.4359              | 0.40                | 0.5570              | 0.8712              | 0.85                | 0.0053              | 0.0355              | 1.88       | 0.8282 | 0.8515 | 0.29  | 0.1263 | 0.2932 | -0.56 | 0.5596 | 0.7950 | -0.43 | 0.3736 | 0.4561 | -2.55 | 0.8708 | 0.9522 | -0.33 | 0.0651 | 0.1220 | 2.06  |
| 1453 E3 ubiquitin-protein ligase Mdm2              | Q95714     | 0.0001              | 0.0133              | 0.49                | 0.6372              | 0.7328              | -0.06               | 0.0065              | 0.0388              | 0.22       | 0.0001 | 0.0081 | 0.62  | 0.0001 | 0.0126 | 0.53  | 0.0396 | 0.1300 | 0.43  | 0.0166 | 0.1201 | 0.27  | 0.0725 | 0.2610 | 0.13  | 0.0144 | 0.1032 | 0.25  |
| 1454 E3 ubiquitin-protein ligase HUWE1             | Q7Z6Z7     | 0.0554              | 0.1540              | 0.14                | 0.1543              | 0.6606              | 0.25                | 0.0082              | 0.0427              | 0.27       | 0.0051 | 0.0288 | 0.29  | 0.0435 | 0.1540 | 0.16  | 0.0159 | 0.0839 | 0.26  | 0.0332 | 0.1523 | 0.32  | 0.0633 | 0.2416 | 0.20  | 0.0103 | 0.0895 | 0.45  |
| 1455 E3 ubiquitin-protein ligase Itchy homolog     | Q96J02     | 0.4108              | 0.5865              | -3.31               | 0.5752              | 0.8210              | -1.75               | 0.5661              | 0.7373              | -1.19      | 0.5388 | 0.6970 | 0.89  | 0.2938 | 0.4810 | -1.88 | 0.9510 | 1.1163 | 0.09  | 0.0231 | 0.1361 | -0.25 | 0.0141 | 0.0992 | -0.30 | 0.0467 | 0.1891 | -0.23 |
| 1456 E3 ubiquitin-protein ligase LRSAM1            | Q6UWE0     | 0.0784              | 0.1920              | 0.18                | 0.3093              | 0.6783              | 0.08                | 0.0427              | 0.1221              | 0.22       | 0.0115 | 0.0430 | 0.35  | 0.0706 | 0.2025 | 0.19  | 0.0750 | 0.1948 | 0.19  | 0.0075 | 0.0891 | 0.48  | 0.2631 | 0.5918 | 0.11  | 0.0849 | 0.1370 | 0.22  |
| 1457 E3 ubiquitin-protein ligase MARCH1            | A6NN9E9    | 0.0033              | 0.0378              | 0.19                | 0.1327              | 0.6479              | 0.19                | 0.1299              | 0.2507              | 0.11       | 0.0074 | 0.0349 | 0.18  | 0.0004 | 0.0166 | 0.29  | 0.0626 | 0.1740 | 0.17  | 0.3736 | 0.5542 | -2.55 | 0.8708 | 1.1316 | -0.33 | 0.0651 | 0.1674 | 2.06  |
| 1458 E3 ubiquitin-protein ligase MARCH5            | Q9NX47     | 0.6315              | 0.6938              | 0.02                | 0.1307              | 0.6448              | 0.19                | 0.4281              | 0.6376              | 0.04       | 0.0428 | 0.1030 | 0.10  | 0.0371 | 0.1401 | 0.12  | 0.0767 | 0.1975 | 0.08  | 0.3736 | 0.5456 | -2.55 | 0.8708 | 1.1162 | -0.33 | 0.0651 | 0.1629 | 2.06  |
| 1459 E3 ubiquitin-protein ligase MARCH7            | Q9H992     | 0.0905              | 0.2108              | 0.14                | 0.0941              | 0.6306              | 0.30                | 0.0019              | 0.0247              | 0.33       | 0.0021 | 0.0202 | 0.29  | 0.0041 | 0.0476 | 0.33  | 0.0699 | 0.1859 | 0.11  | 0.3736 | 0.5493 | -2.55 | 0.8708 | 1.1229 | -0.33 | 0.0651 | 0.1648 | 2.06  |
| 1460 E3 ubiquitin-protein ligase Mdm1              | Q90887     | 0.2227              | 0.4003              | 0.07                | 0.5491              | 0.8648              | 0.08                | 0.1058              | 0.2133              | 0.25       | 0.9577 | 0.9635 | 0.00  | 0.0991 | 0.2516 | -0.12 | 0.3553 | 0.5609 | 0.06  | 0.3736 | 0.4737 | -2.55 | 0.8708 | 0.9851 | -0.33 | 0.0651 | 0.1794 | 2.06  |
| 1461 E3 ubiquitin-protein ligase MGN1              | Q60291     | 0.4108              | 0.5864              | -3.31               | 0.5752              | 0.8208              | -1.75               | 0.5661              | 0.7372              | -1.19      | 0.5388 | 0.6969 | 0.89  | 0.2938 | 0.4808 | -1.88 | 0.9510 | 1.1160 | 0.09  | 0.0025 | 0.0558 | -1.61 | 0.0012 | 0.0296 | 0.95  | 0.0758 | 0.1259 | -0.39 |
| 1462 E3 ubiquitin-protein ligase MIB1              | Q86Y76     | 0.1772              | 0.3395              | 0.19                | 0.8240              | 0.8738              | 0.03                | 0.8192              | 0.8536              | 0.02       | 0.8191 | 0.8439 | -0.03 | 0.7817 | 0.8289 | -0.03 | 0.6447 | 0.8814 | -0.05 | 0.3736 | 0.4479 | -2.55 | 0.8708 | 0.9368 | -0.33 | 0.0651 | 0.1186 | 2.06  |
| 1463 E3 ubiquitin-protein ligase NEDD4             | P46934     | 0.0152              | 0.0717              | -0.51               | 0.0010              | 0.2355              | -0.27               | 0.0031              | 0.0307              | -0.31      | 0.0170 | 0.0545 | -0.64 | 0.0240 | 0.1121 | -0.53 | 0.0722 | 0.1898 | -0.13 | 0.3736 | 0.5482 | -2.55 | 0.8708 | 1.1210 | -0.33 | 0.0651 | 0.1643 | 2.06  |
| 1464 E3 ubiquitin-protein ligase NEDD4-like        | Q96PU5     | 0.4108              | 0.5862              | -3.31               | 0.5752              | 0.8206              | -1.75               | 0.5661              | 0.7370              | -1.19      | 0.5388 | 0.6967 | 0.89  | 0.2938 | 0.4807 | -1.88 | 0.9510 | 1.1158 | 0.09  | 0.0358 | 0.1564 | 0.28  | 0.1701 | 0.5421 | 0.12  | 0.0201 | 0.6782 | 0.02  |
| 1465 E3 ubiquitin-protein ligase NDR3              | Q9UPQ7     | 0.4108              | 0.5860              | -3.31               | 0.5752              | 0.8204              | -1.75               | 0.5661              | 0.7368              | -1.19      | 0.5388 | 0.6965 | 0.89  | 0.2938 | 0.4805 | -1.88 | 0.9510 | 1.1155 | 0.09  | 0.7466 | 0.7841 | 0.06  | 0.7399 | 1.1822 | -0.06 | 0.0138 | 0.1017 | 0.73  |
| 1466 E3 ubiquitin-protein ligase pellino homolog 3 | Q8NZH9     | 0.4108              | 0.5859              | -3.31               | 0.5752              | 0.8201              | -1.75               | 0.5661              | 0.7366              | -1.19      | 0.5388 | 0.6964 | 0.89  | 0.2938 | 0.4804 | -1.88 | 0.9510 | 1.1153 | 0.09  | 0.4372 | 0.4930 | 0.11  | 0.0748 | 0.2656 | 0.26  | 0.7030 | 0.7544 | 0.05  |
| 1467 E3 ubiquitin-protein ligase PPP1R11           | Q60927     | 0.0072              | 0.0502              | 0.49                | 0.4342              | 0.7708              | -0.42               | 0.0086              | 0.0437              | -0.47      | 0.1169 | 0.2184 | 0.44  | 0.2189 | 0.4245 | -0.12 | 0.3279 | 0.5305 | 0.38  | 0.3736 | 0.4769 | -2.55 | 0.8708 | 0.9909 | -0.33 | 0.0651 | 0.1307 | 2.06  |
| 1468 E3 ubiquitin-protein ligase RAD18             | Q9NS91     | 0.4108              | 0.5857              | -3.31               | 0.5752              | 0.8199              | -1.75               | 0.5661              | 0.7364              | -1.19      | 0.5388 | 0.6962 | 0.89  | 0.2938 | 0.4802 | -1.88 | 0.9510 | 1.1150 | 0.09  | 0.0128 | 0.1073 | 0.38  | 0.0057 | 0.0609 | 0.22  | 0.0013 | 0.0449 | 0.44  |
| 1469 E3 ubiquitin-protein ligase RBBP6             | Q7Z6F9     | 0.0175              | 0.0775              | 0.12                | 0.4546              | 0.7876              | 0.18                | 0.0191              | 0.0663              | 0.35       | 0.0021 | 0.0199 | 0.34  | 0.8443 | 0.8800 | 0.01  | 0.0030 | 0.0547 | 0.27  | 0.3736 | 0.6381 | -2.55 | 0.8708 | 1.2789 | -0.33 | 0.0651 | 0.2167 | 2.06  |
| 1470 E3 ubiquitin-protein ligase RBX1              | P62877     | 0.0144              | 0.0700              | -0.97               | 0.6375              | 0.7330              | -0.06               | 0.1173              | 0.2323              | -0.25      | 0.5405 | 0.5920 | -0.09 | 0.2040 | 0.4053 | -0.17 | 0.0347 | 0.1200 | -0.45 | 0.3736 | 0.5749 | -2.55 | 0.8708 | 1.1686 | -0.33 | 0.0651 | 0.1785 | 2.06  |
| 1471 E3 ubiquitin-protein ligase RNF113A           | Q15541     | 0.3975              | 0.6163              | -0.08               | 0.4995              | 0.8124              | 0.07                | 0.4470              | 0.6602              | -0.12      | 0.4949 | 0.6981 | 0.06  | 0.1125 | 0.2736 | -0.18 | 0.3423 | 0.5466 | -0.09 | 0.0073 | 0.0875 | -0.47 | 0.0137 | 0.0975 | -0.75 | 0.1730 | 0.2390 | -1.29 |
| 1472 E3 ubiquitin-protein ligase RNF114            | Q9Y508     | 0.0389              | 0.1239              | 0.16                | 0.2767              | 0.6651              | 0.19                | 0.0026              | 0.0278              | 0.36       | 0.0038 | 0.0251 | 0.32  | 0.4719 | 0.5627 | 0.04  | 0.0242 | 0.0993 | 0.24  | 0.0117 | 0.1041 | 0.40  | 0.1469 | 0.4109 | 0.11  | 0.1474 | 0.2098 | 0.10  |
| 1473 E3 ubiquitin-protein ligase RNF123            | Q5XP14     | 0.1234              | 0.2699              | 1.80                | 0.5248              | 0.8440              | -0.88               | 0.4852              | 0.7052              | -0.60      | 0.2144 | 0.3515 | 2.22  | 0.2863 | 0.5160 | -0.93 | 0.2148 | 0.3962 | 2.68  | 0.3736 | 0.4995 | -2.55 | 0.8708 | 1.0327 | -0.33 | 0.0651 | 0.1407 | 2.06  |
| 1474 E3 ubiquitin-protein ligase RNF126            | Q9VBH8     | 0.5717              | 0.6393              | -0.06               | 0.6949              | 0.7743              | 0.07                | 0.0553              | 0.1342              | 0.34       | 0.3568 | 0.5351 | 0.11  | 0.2574 | 0.4774 | 0.15  | 0.0856 | 0.1233 | 0.01  | 0.0607 | 0.1943 | 0.23  | 0.1604 | 0.4341 | 0.15  | 0.0026 | 0.0545 | 0.81  |
| 1475 E3 ubiquitin-protein ligase RNF14             | Q9UBS8     | 0.4108              | 0.5856              | -3.31               | 0.5752              | 0.8197              | -1.75               | 0.5661              | 0.7362              | -1.19      | 0.5388 | 0.6960 | 0.89  | 0.2938 | 0.4801 | -1.88 | 0.9510 | 1.1148 | 0.09  | 0.0012 | 0.0447 | 1.05  | 0.0000 | 0.0000 | 0.76  | 0.0000 | 0.0000 | 1.26  |
| 1476 E3 ubiquitin-protein ligase RNF187            | Q7A331     | 0.2314              | 0.4130              | 0.12                | 0.4059              | 0.7488              | 0.15                | 0.0894              | 0.1876              | 0.20       | 0.0897 | 0.1787 | 0.20  | 0.7119 | 0.7724 | -0.03 | 0.0256 | 0.0896 | -0.02 | 0.3736 | 0.4365 | -2.55 | 0.8708 | 0.9153 | -0.33 | 0.0651 | 0.1141 | 2.06  |

Supplementary Table S2. Overview on all relatively quantified 5180 proteins statistical analysis

|      | Protein name                                                            | UniProt | MCF-7               |            |                     |         | MDA-MB-231          |        |                     |            |
|------|-------------------------------------------------------------------------|---------|---------------------|------------|---------------------|---------|---------------------|--------|---------------------|------------|
|      |                                                                         |         | Dai SC20 vs control |            | Gen SC20 vs control |         | SSE SC20 vs control |        | Dai IC20 vs control |            |
|      |                                                                         |         | p value             | BH q value | log2FC              | p value | BH q value          | log2FC | p value             | BH q value |
| 1523 | ELAV-like protein 1                                                     | Q15717  | 0.0484              | 0.1414     | 0.10                | 0.6132  | 0.7146              | 0.01   | 0.0311              | 0.0901     |
| 1524 | Electrogenic sodium bicarbonate cotransporter 1                         | O9YG61  | 0.4108              | 0.5838     | -3.31               | 0.5752  | 0.8172              | -1.75  | 0.5661              | 0.7342     |
| 1525 | Electron transfer flavoprotein subunit alpha _mitochondrial             | P13804  | 0.5648              | 0.6327     | 0.03                | 0.1672  | 0.6606              | 0.15   | 0.1659              | 0.3033     |
| 1526 | Electron transfer flavoprotein subunit beta                             | P38117  | 0.5580              | 0.6267     | -0.04               | 0.6657  | 0.7537              | 0.03   | 0.1781              | 0.3027     |
| 1527 | ELKS/Rab6-interacting CAST family member 1                              | Q8IU02  | 0.4108              | 0.5836     | -3.31               | 0.5752  | 0.8170              | -1.75  | 0.5661              | 0.7340     |
| 1528 | Ellis-van Creveld syndrome protein                                      | P57679  | 0.0131              | 0.0668     | -0.19               | 0.5662  | 0.8704              | -0.15  | 0.0015              | 0.0224     |
| 1529 | Elongation factor 1-alpha 1                                             | P68104  | 0.4108              | 0.5835     | -3.31               | 0.5752  | 0.8168              | -1.75  | 0.5661              | 0.7338     |
| 1530 | Elongation factor 1-alpha 2                                             | Q05639  | 0.1523              | 0.3033     | 0.08                | 0.1598  | 0.6690              | 0.15   | 0.0357              | 0.0987     |
| 1531 | Elongation factor 1-beta                                                | P24534  | 0.0014              | 0.0257     | 0.11                | 0.5464  | 0.8613              | 0.05   | 0.0022              | 0.0261     |
| 1532 | Elongation factor 1-delta                                               | P29692  | 0.0422              | 0.1302     | 0.20                | 0.3866  | 0.7290              | 0.17   | 0.0097              | 0.0458     |
| 1533 | Elongation factor 1-gamma                                               | P26641  | 0.0095              | 0.0575     | 0.24                | 0.2500  | 0.6600              | 0.25   | 0.0013              | 0.0225     |
| 1534 | Elongation factor 2                                                     | P13639  | 0.0086              | 0.0549     | 0.31                | 0.2781  | 0.6654              | 0.24   | 0.0014              | 0.0223     |
| 1535 | Elongation factor G _mitochondrial                                      | Q96R99  | 0.4032              | 0.6231     | -0.08               | 0.7882  | 0.8476              | 0.03   | 0.8761              | 0.9019     |
| 1536 | Elongation factor Ts _mitochondrial                                     | P43897  | 0.2980              | 0.4968     | 0.04                | 0.0489  | 0.5744              | 0.19   | 0.0290              | 0.0865     |
| 1537 | Elongation factor Tu _mitochondrial                                     | P49411  | 0.0086              | 0.0548     | 0.26                | 0.2035  | 0.6609              | 0.26   | 0.0080              | 0.0421     |
| 1538 | Elongation of very long chain fatty acids protein 1                     | Q9BW60  | 0.4108              | 0.5833     | -3.31               | 0.5752  | 0.8165              | -1.75  | 0.5661              | 0.7336     |
| 1539 | Elongator complex protein 1                                             | O95163  | 0.6923              | 0.7474     | -0.13               | 0.8344  | 0.8803              | -0.11  | 0.2098              | 0.3638     |
| 1540 | Elongator complex protein 5                                             | Q8TE02  | 0.4108              | 0.5832     | -3.31               | 0.5752  | 0.8163              | -1.75  | 0.5661              | 0.7335     |
| 1541 | Elongin-B                                                               | Q15370  | 0.8818              | 0.9067     | -0.01               | 0.4466  | 0.7821              | 0.15   | 0.5711              | 0.6289     |
| 1542 | Elongin-C                                                               | Q15369  | 0.0121              | 0.0636     | 0.21                | 0.0450  | 0.5672              | 0.23   | 0.0002              | 0.0230     |
| 1543 | Embryonic stem cell-specific 5-hydroxymethylcytosine-binding protein    | Q96F22  | 0.3391              | 0.5472     | 0.08                | 0.6522  | 0.7435              | 0.03   | 0.6807              | 0.7303     |
| 1544 | Embryonic testis differentiation protein homolog B                      | P0DDP9  | 0.4108              | 0.5830     | -3.31               | 0.5752  | 0.8161              | -1.75  | 0.5661              | 0.7333     |
| 1545 | Emerin                                                                  | P50402  | 0.0491              | 0.1422     | -0.46               | 0.0438  | 0.5686              | -1.16  | 0.3836              | 0.5844     |
| 1546 | Ena/VASP-like protein                                                   | Q9UI08  | 0.0257              | 0.0970     | -0.44               | 0.3242  | 0.6855              | -0.16  | 0.2139              | 0.3685     |
| 1547 | Endogenous Bornavirus-like nucleoprotein 2                              | Q6P217  | 0.4108              | 0.5828     | -3.31               | 0.5752  | 0.8159              | -1.75  | 0.5661              | 0.7331     |
| 1548 | Endogenous retrovirus group 3 member 1 Env polyprotein                  | Q14264  | 0.4108              | 0.5827     | -3.31               | 0.5752  | 0.8156              | -1.75  | 0.5661              | 0.7329     |
| 1549 | Endogenous retrovirus group K member 104 Rec protein                    | P61576  | 0.0545              | 0.1528     | -0.53               | 0.2624  | 0.6634              | -0.43  | 0.0125              | 0.0524     |
| 1550 | Endonuclease 8-like 2                                                   | O96952  | 0.5232              | 0.5947     | 0.08                | 0.0703  | 0.7789              | -0.12  | 0.9840              | 0.9870     |
| 1551 | Endonuclease 8-like 3                                                   | Q8TAT5  | 0.2850              | 0.4806     | -0.24               | 0.1864  | 0.6668              | -0.89  | 0.0476              | 0.1211     |
| 1552 | Endonuclease/exonuclease/phosphatase family domain-containing protein 1 | Q7L9B9  | 0.4108              | 0.5825     | -3.31               | 0.5752  | 0.8154              | -1.75  | 0.5661              | 0.7327     |
| 1553 | Endophilin-A1                                                           | Q99862  | 0.4108              | 0.5824     | -3.31               | 0.5752  | 0.8152              | -1.75  | 0.5661              | 0.7326     |
| 1554 | Endophilin-A2                                                           | Q99861  | 0.0582              | 0.1590     | -0.25               | 0.1759  | 0.6627              | -0.08  | 0.2553              | 0.0790     |
| 1555 | Endophilin-B2                                                           | Q0NR46  | 0.1469              | 0.2952     | 0.12                | 0.1992  | 0.6644              | 0.28   | 0.0064              | 0.0388     |
| 1556 | Endoplasmic reticulum aminopeptidase 1                                  | Q9NZ08  | 0.4108              | 0.5822     | -3.31               | 0.5752  | 0.8150              | -1.75  | 0.5661              | 0.7324     |
| 1557 | Endoplasmic reticulum chaperone BiP                                     | P11021  | 0.0032              | 0.0372     | 0.42                | 0.2011  | 0.6610              | 0.29   | 0.0009              | 0.0210     |
| 1558 | Endoplasmic reticulum junction formation protein lunapark               | Q9COE8  | 0.0991              | 0.2239     | -0.17               | 0.0629  | 0.7368              | -0.08  | 0.1606              | 0.2954     |
| 1559 | Endoplasmic reticulum metalloproteinase 1                               | Q722K6  | 0.0312              | 0.1093     | -0.22               | 0.7397  | 0.8108              | 0.05   | 0.0930              | 0.1931     |
| 1560 | Endoplasmic reticulum protein SC65                                      | Q92791  | 0.0745              | 0.1850     | -2.58               | 0.3092  | 0.6787              | -2.13  | 0.0333              | 0.0943     |
| 1561 | Endoplasmic reticulum resident protein 29                               | P30040  | 0.0106              | 0.0596     | 0.23                | 0.3092  | 0.6790              | 0.13   | 0.0052              | 0.0352     |
| 1562 | Endoplasmic reticulum resident protein 44                               | Q9BS26  | 0.0028              | 0.0356     | 0.34                | 0.1662  | 0.6602              | 0.38   | 0.0105              | 0.0479     |
| 1563 | Endoplasmic reticulum-Golgi intermediate compartment protein 1          | Q969X5  | 0.0632              | 0.1665     | -0.10               | 0.2002  | 0.6635              | 0.08   | 0.0566              | 0.1361     |
| 1564 | Endoplasmic reticulum-Golgi intermediate compartment protein 2          | Q96RQ1  | 0.4108              | 0.5820     | -3.31               | 0.5752  | 0.8147              | -1.75  | 0.5661              | 0.7322     |
| 1565 | Endoplasmic reticulum-Golgi intermediate compartment protein 3          | Q9Y282  | 0.0216              | 0.0875     | -0.16               | 0.2839  | 0.6642              | 0.14   | 0.0039              | 0.0317     |
| 1566 | Endoplasmic reticulum protein                                           | P14625  | 0.0049              | 0.0434     | 0.38                | 0.1982  | 0.6675              | 0.31   | 0.0014              | 0.0227     |
| 1567 | Endonuclease LACTB2                                                     | Q33H82  | 0.1194              | 0.2549     | -0.33               | 0.7552  | 0.8222              | 0.05   | 0.0414              | 0.6655     |
| 1568 | Endothelial differentiation-related factor 1                            | O60869  | 0.2489              | 0.4354     | 0.07                | 0.3303  | 0.6893              | 0.17   | 0.0359              | 0.0991     |
| 1569 | Endothelin-converting enzyme 1                                          | P42892  | 0.4108              | 0.5819     | -3.31               | 0.5752  | 0.8145              | -1.75  | 0.5661              | 0.7320     |
| 1570 | Enhancer of filamentation 1                                             | Q14511  | 0.4108              | 0.5817     | -3.31               | 0.5752  | 0.8143              | -1.75  | 0.5661              | 0.7318     |
| 1571 | Enhancer of mRNA-decapping protein 4                                    | Q6P2E9  | 0.3183              | 0.5211     | 0.02                | 0.3699  | 0.7182              | -0.07  | 0.0088              | 0.0439     |
| 1572 | Enhancer of rudimentary homolog                                         | P84099  | 0.0184              | 0.0798     | -0.38               | 0.9895  | 0.9924              | 0.00   | 0.8454              | 0.8757     |
| 1573 | Enolase-phosphatase E1                                                  | Q9UHY7  | 0.1466              | 0.2948     | -0.26               | 0.0871  | 0.6189              | -0.37  | 0.0628              | 0.1457     |
| 1574 | Enoyl-CoA delta isomerase 1 _mitochondrial                              | P42126  | 0.0309              | 0.1086     | 0.28                | 0.6255  | 0.7228              | 0.05   | 0.2185              | 0.3749     |
| 1575 | Enoyl-CoA delta isomerase 2 _mitochondrial                              | O75521  | 0.1037              | 0.2303     | 0.12                | 0.3682  | 0.7289              | 0.06   | 0.1249              | 0.2439     |
| 1576 | Enoyl-CoA hydratase domain-containing protein 2 _mitochondrial          | Q86YB7  | 0.0613              | 0.1637     | 0.14                | 0.3119  | 0.6800              | 0.22   | 0.0122              | 0.0518     |
| 1577 | Enoyl-CoA hydratase _mitochondrial                                      | P30084  | 0.0035              | 0.0383     | 0.16                | 0.5000  | 0.5743              | 0.24   | 0.8569              | 0.8862     |
| 1578 | Enscosin                                                                | Q14244  | 0.0144              | 0.0700     | 0.31                | 0.1918  | 0.6686              | 0.31   | 0.0010              | 0.0212     |
| 1579 | Envoplakin                                                              | Q92817  | 0.6023              | 0.6679     | -0.02               | 0.2491  | 0.6593              | 0.17   | 0.3359              | 0.5284     |
| 1580 | Envoplakin-like protein                                                 | AKM236  | 0.4108              | 0.5816     | -3.31               | 0.5752  | 0.8141              | -1.75  | 0.5661              | 0.7316     |
| 1581 | Ephrin type-A receptor 2                                                | P29317  | 0.4108              | 0.5814     | -3.31               | 0.5752  | 0.8139              | -1.75  | 0.5661              | 0.7315     |
| 1582 | Ephrin type-A receptor 4                                                | P47654  | 0.0135              | 0.0679     | 1.41                | 0.0135  | 0.4436              | 1.24   | 0.0118              | 0.0509     |
| 1583 | Ephrin type-A receptor 6                                                | Q9UF33  | 0.4108              | 0.5812     | -3.31               | 0.5752  | 0.8136              | -1.75  | 0.5661              | 0.7313     |
| 1584 | Ephrin type-A receptor 7                                                | Q15375  | 0.4108              | 0.5811     | -3.31               | 0.5752  | 0.8134              | -1.75  | 0.5661              | 0.7311     |
| 1585 | Ephrin type-B receptor 3                                                | P54753  | 0.2978              | 0.4967     | 0.07                | 0.2476  | 0.6581              | 0.20   | 0.0291              | 0.0867     |
| 1586 | Ephrin type-B receptor 4                                                | P54760  | 0.0930              | 0.2147     | 0.35                | 0.1066  | 0.6304              | 0.31   | 0.6183              | 0.6726     |
| 1587 | Epidermal growth factor receptor                                        | P00533  | 0.4108              | 0.5809     | -3.31               | 0.5752  | 0.8132              | -1.75  | 0.5661              | 0.7309     |
| 1588 | Epidermal growth factor receptor kinase substrate 8                     | Q12929  | 0.4108              | 0.5808     | -3.31               | 0.5752  | 0.8130              | -1.75  | 0.5661              | 0.7307     |
| 1589 | Epidermal growth factor receptor kinase substrate 8-like protein 1      | Q8TE68  | 0.1490              | 0.2980     | -7.40               | 0.1842  | 0.6635              | -5.85  | 0.1746              | 0.3163     |
| 1590 | Epidermal growth factor receptor kinase substrate 8-like protein 2      | Q9H6S3  | 0.1205              | 0.2562     | 0.07                | 0.0661  | 0.5934              | -0.08  | 0.0088              | 0.0440     |
| 1591 | Epidermal growth factor receptor substrate 15                           | P42566  | 0.5998              | 0.6657     | 0.08                | 0.0325  | 0.5180              | 0.37   | 0.4325              | 0.6429     |
| 1592 | Epidermal growth factor receptor substrate 15-like 1                    | O9UBC2  | 0.0119              | 0.0629     | -0.42               | 0.1724  | 0.6610              | -0.22  | 0.3516              | 0.5458     |
| 1593 | Epidermal growth factor receptor substrate 15-like 1                    | O9UBH3  | 0.0250              | 0.0955     | -3.91               | 0.2742  | 0.6646              | -3.81  | 0.2302              | 0.3896     |
| 1594 | Epilakin                                                                | P58107  | 0.4445              | 0.5221     | 0.04                | 0.1731  | 0.6598              | 0.21   | 0.0185              | 0.0653     |

Supplementary Table S2. Overview on all relatively quantified 5180 proteins statistical analysis

| Protein name                                                           | UniProt    | MCF-7               |                     |                     |                     | MDA-MB-231          |                     |                     |                     |            |          |        |       |        |        |       |        |        |       |        |        |       |        |        |        |        |        |       |
|------------------------------------------------------------------------|------------|---------------------|---------------------|---------------------|---------------------|---------------------|---------------------|---------------------|---------------------|------------|----------|--------|-------|--------|--------|-------|--------|--------|-------|--------|--------|-------|--------|--------|--------|--------|--------|-------|
|                                                                        |            | Dai SC20 vs control | Gen SC20 vs control | SSE SC20 vs control | Dai IC20 vs control | Gen IC20 vs control | SSE IC20 vs control | Dai IC20 vs control | Gen IC20 vs control |            |          |        |       |        |        |       |        |        |       |        |        |       |        |        |        |        |        |       |
| p value                                                                | BH q value | log2FC              | p value             | BH q value          | log2FC              | p value             | BH q value          | log2FC              | p value             | BH q value | log2FC   |        |       |        |        |       |        |        |       |        |        |       |        |        |        |        |        |       |
| 1595 Epithelial cell adhesion molecule                                 | P16422     | 0.0151              | 0.0713              | 0.18                | 0.4832              | 0.8082              | 0.09                | 0.0010              | 0.2027              | 0.37       | 0.0014   | 0.0172 | 0.31  | 0.0118 | 0.0783 | 0.27  | 0.0058 | 0.0622 | 0.38  | 0.3736 | 0.6267 | -2.55 | 87808  | 1.2593 | -0.33  | 0.0651 | 0.2093 | 2.06  |
| 1596 Epithelial splicing regulatory protein 1                          | Q6NXG1     | 0.4108              | 0.5806              | -3.31               | 0.5752              | 0.8127              | -1.75               | 0.5661              | 0.7305              | -0.19      | 0.5388   | 0.6907 | 0.89  | 0.2938 | 0.4754 | -1.88 | 0.9510 | 1.1070 | 0.09  | 0.0128 | 0.1071 | -0.51 | 0.0040 | 0.0512 | 0.68   | 0.9517 | 0.9623 | 0.01  |
| 1597 Epithelial splicing regulatory protein 2                          | Q9H6T0     | 0.0003              | 0.0162              | -1.55               | 0.0001              | 0.5180              | -1.59               | 0.0065              | 0.0391              | -0.19      | 0.0003   | 0.0109 | -3.74 | 0.0006 | 0.0206 | -0.66 | 0.1815 | 0.3512 | 0.18  | 0.3736 | 0.5066 | -2.55 | 87808  | 1.0456 | -0.33  | 0.0651 | 0.1439 | 2.06  |
| 1598 Epithelial-stromal interaction protein 1                          | Q96J88     | 0.7097              | 0.7614              | -0.03               | 0.6862              | 0.7709              | 0.04                | 0.0247              | 0.0779              | -0.29      | 0.0137   | 0.0475 | -0.36 | 0.0209 | 0.1039 | -0.37 | 0.5263 | 0.7558 | 0.04  | 0.3736 | 0.4385 | -2.55 | 87808  | 0.9567 | -0.33  | 0.0651 | 0.1229 | 2.06  |
| 1599 Epoxide hydrolase 1                                               | P07099     | 0.0674              | 0.1721              | 0.23                | 0.4434              | 0.7794              | -0.07               | 0.1358              | 0.2588              | 0.16       | 0.2902   | 0.4522 | 0.19  | 0.0119 | 0.0782 | -0.43 | 0.0970 | 0.0648 | 0.61  | 0.0261 | 0.1407 | 0.30  | 0.0314 | 0.1508 | 0.24   | 0.1904 | 0.2582 | 0.11  |
| 1600 Epsin                                                             | O95925     | 0.0532              | 0.1499              | 0.36                | 0.0222              | 0.4792              | 0.24                | 0.0178              | 0.0638              | 0.43       | 0.0028   | 0.0218 | 0.24  | 0.0100 | 0.0720 | -0.18 | 0.0040 | 0.0602 | 0.51  | 0.3736 | 0.6347 | -2.55 | 87808  | 1.2731 | -0.33  | 0.0651 | 0.2145 | 2.06  |
| 1601 Epsin-sarcoglycan                                                 | O43556     | 0.0624              | 0.1656              | 4.69                | 0.5772              | 0.6862              | 0.94                | 0.0741              | 0.1629              | 1.61       | 0.4183   | 0.6102 | 1.02  | 0.5373 | 0.6219 | -0.60 | 0.1599 | 0.3207 | 1.04  | 0.3736 | 0.5122 | -2.55 | 87808  | 1.0559 | -0.33  | 0.0651 | 0.1466 | 2.06  |
| 1602 Epsin-1                                                           | Q9Y643     | 0.4108              | 0.5805              | -3.31               | 0.5752              | 0.8125              | -1.75               | 0.5661              | 0.7304              | -0.19      | 0.5388   | 0.6905 | 0.89  | 0.2938 | 0.4753 | -1.88 | 0.9510 | 1.1068 | 0.09  | 0.2261 | 0.4510 | -0.19 | 0.3235 | 0.6762 | -0.12  | 0.0716 | 0.1200 | -0.24 |
| 1603 Epsin-2                                                           | O95208     | 0.4108              | 0.5803              | -3.31               | 0.5752              | 0.8123              | -1.75               | 0.5661              | 0.7302              | -0.19      | 0.5388   | 0.6903 | 0.89  | 0.2938 | 0.4751 | -1.88 | 0.9510 | 1.1065 | 0.09  | 0.0140 | 0.1107 | -0.52 | 0.0191 | 0.1185 | -0.55  | 0.0912 | 0.1449 | -0.58 |
| 1604 Equilibrative nucleoside transporter 1                            | Q99808     | 0.0864              | 0.2043              | 0.10                | 0.3293              | 0.6886              | 0.19                | 0.0310              | 0.0900              | 0.21       | 0.0030   | 0.0223 | 0.28  | 0.1387 | 0.3102 | 0.07  | 0.0497 | 0.1495 | 0.13  | 0.0789 | 0.2232 | 0.47  | 0.0258 | 0.1439 | 0.13   | 0.0305 | 0.1475 | 0.22  |
| 1605 ER lumen protein-retaining receptor 1                             | P24390     | 0.0039              | 0.0396              | -0.42               | 0.1024              | 0.6337              | -0.25               | 0.0071              | 0.0400              | -0.35      | 0.0063   | 0.0318 | -0.33 | 0.0126 | 0.0802 | -0.40 | 0.0902 | 0.2191 | -0.32 | 0.3736 | 0.5377 | -2.55 | 87808  | 1.1021 | -0.33  | 0.0651 | 0.1589 | 2.06  |
| 1606 ER membrane protein complex subunit 1                             | Q8N766     | 0.8315              | 0.8654              | 0.01                | 0.5947              | 0.6990              | -0.04               | 0.5058              | 0.7278              | -0.04      | 0.4206   | 0.6122 | 0.08  | 0.5205 | 0.6083 | -0.05 | 0.8468 | 1.0820 | -0.01 | 0.0099 | 0.0996 | -0.16 | 0.0143 | 0.1001 | -0.13  | 0.3568 | 0.4284 | -0.03 |
| 1607 ER membrane protein complex subunit 2                             | Q15006     | 0.5296              | 0.6009              | 0.05                | 0.8330              | 0.8799              | -0.03               | 0.0234              | 0.0751              | 0.29       | 0.2548   | 0.4051 | 0.14  | 0.2290 | 0.4387 | 0.12  | 0.6376 | 0.8747 | 0.06  | 0.9073 | 0.9241 | 0.02  | 0.9059 | 0.9298 | -0.02  | 0.1929 | 0.2608 | 0.23  |
| 1608 ER membrane protein complex subunit 3                             | Q9P0I2     | 0.0197              | 0.0824              | 0.27                | 0.0105              | 0.4458              | -0.25               | 0.5179              | 0.7384              | -0.03      | 0.2193   | 0.3579 | -0.18 | 0.0598 | 0.1843 | -0.17 | 0.2148 | 0.3964 | 0.14  | 0.0577 | 0.1915 | -0.54 | 0.0598 | 0.2338 | 0.14   | 0.6280 | 0.6857 | 0.04  |
| 1609 ER membrane protein complex subunit 4                             | Q5J8M3     | 0.0484              | 0.1413              | -0.08               | 0.1462              | 0.6551              | 0.13                | 0.1462              | 0.2737              | 0.05       | 0.1940   | 0.3241 | -0.05 | 0.0345 | 0.1354 | -0.11 | 0.0850 | 0.2120 | 0.06  | 0.0087 | 0.0933 | -0.48 | 0.0002 | 0.0164 | -0.72  | 0.0005 | 0.0328 | -0.09 |
| 1610 ER membrane protein complex subunit 7                             | Q9NPA0     | 0.0089              | 0.0560              | -0.70               | 0.0607              | 0.5933              | -0.27               | 0.0101              | 0.0469              | -0.23      | 0.0131   | 0.0464 | -0.21 | 0.0033 | 0.0429 | -0.31 | 0.0091 | 0.0690 | -0.33 | 0.3736 | 0.6163 | -2.55 | 87808  | 1.2413 | -0.33  | 0.0651 | 0.2028 | 2.06  |
| 1611 ER membrane protein complex subunit 8                             | O43402     | 0.2858              | 0.4814              | 0.05                | 0.9111              | 0.9381              | 0.01                | 0.6149              | 0.6692              | -0.02      | 0.2116   | 0.3479 | 0.06  | 0.0253 | 0.1143 | -0.15 | 0.7361 | 0.9759 | 0.03  | 0.3736 | 0.4429 | -2.55 | 87808  | 0.9276 | -0.33  | 0.0651 | 0.1166 | 2.06  |
| 1612 Erbin                                                             | Q96RT1     | 0.4108              | 0.5801              | -3.31               | 0.5752              | 0.8121              | -1.75               | 0.5661              | 0.7300              | -0.19      | 0.5388   | 0.6902 | 0.89  | 0.2938 | 0.4750 | -1.88 | 0.9510 | 1.1063 | 0.09  | 0.0939 | 0.0667 | 0.71  | 0.0005 | 0.0229 | 0.67   | 0.0026 | 0.0554 | 0.52  |
| 1613 ERC protein 2                                                     | O15083     | 0.4108              | 0.5800              | -3.31               | 0.5752              | 0.8119              | -1.75               | 0.5661              | 0.7298              | -0.19      | 0.5388   | 0.6900 | 0.89  | 0.2938 | 0.4748 | -1.88 | 0.9510 | 1.1060 | 0.09  | 0.5450 | 0.5960 | -0.02 | 0.2106 | 0.5129 | -0.12  | 0.0071 | 0.1564 | 0.07  |
| 1614 Erln-1                                                            | O75477     | 0.0295              | 0.1052              | 0.17                | 0.2816              | 0.6642              | 0.15                | 0.0210              | 0.0471              | 0.26       | 0.0224   | 0.0654 | 0.22  | 0.0442 | 0.1552 | 0.15  | 0.0211 | 0.0941 | 0.21  | 0.0424 | 0.1675 | -1.56 | 0.0008 | 0.0247 | -2.08  | 0.1037 | 0.1597 | -0.58 |
| 1615 Erln-2                                                            | Q94905     | 0.0270              | 0.0996              | 0.17                | 0.2627              | 0.6655              | 0.15                | 0.0177              | 0.0635              | 0.13       | 0.8457   | 0.8676 | 0.01  | 0.1666 | 0.5527 | 0.06  | 0.2028 | 0.3806 | 0.06  | 0.0323 | 0.1511 | 0.17  | 0.4039 | 0.7898 | 0.04   | 0.7557 | 0.7987 | -0.02 |
| 1616 ERα-like protein alpha                                            | Q96H17     | 0.1025              | 0.2290              | 0.12                | 0.1616              | 0.6628              | 0.15                | 0.0166              | 0.0610              | 0.24       | 0.0358   | 0.0908 | 0.23  | 0.1294 | 0.2972 | 0.11  | 0.0467 | 0.1436 | 0.20  | 0.2293 | 0.4561 | 0.08  | 0.3317 | 0.6884 | -0.04  | 0.5169 | 0.5832 | -0.03 |
| 1617 ERα-like protein beta                                             | Q86YB8     | 0.0580              | 0.1586              | 0.15                | 0.2109              | 0.6625              | 0.15                | 0.0082              | 0.0426              | 0.19       | 0.0539   | 0.1215 | 0.15  | 0.7031 | 0.7642 | -0.01 | 0.3865 | 0.5975 | 0.07  | 0.0205 | 0.1324 | 0.40  | 0.0759 | 0.2687 | 0.15   | 0.0351 | 0.1606 | 0.19  |
| 1618 Erythrocyte band 7 integral membrane protein                      | P27105     | 0.0000              | 0.0000              | 3.07                | 0.9453              | 0.9637              | -0.01               | 0.6535              | 0.7049              | -0.02      | 0.0061   | 0.0064 | 1.05  | 0.0049 | 0.0529 | -0.47 | 0.0042 | 0.0606 | 0.25  | 0.0728 | 0.2135 | 0.31  | 0.0043 | 0.0524 | 0.19   | 0.0007 | 0.0333 | 0.62  |
| 1619 Erythroid differentiation-related factor 1                        | Q3BT11     | 0.4108              | 0.5798              | -3.31               | 0.5752              | 0.8116              | -1.75               | 0.5661              | 0.7296              | -0.19      | 0.5388   | 0.6898 | 0.89  | 0.2938 | 0.4747 | -1.88 | 0.9510 | 1.1058 | 0.09  | 0.0867 | 0.2360 | 0.36  | 0.0097 | 0.0813 | 0.38   | 0.2230 | 0.2929 | -0.03 |
| 1620 ESF1 homolog                                                      | Q9H501     | 0.0332              | 0.1137              | 0.42                | 0.0800              | 0.6112              | 0.32                | 0.0004              | 0.0223              | 0.51       | 0.0189   | 0.0582 | 0.21  | 0.0769 | 0.2131 | 0.10  | 0.0032 | 0.0572 | 0.34  | 0.3736 | 0.6374 | -2.55 | 87808  | 1.2778 | -0.33  | 0.0651 | 0.2163 | 2.06  |
| 1621 Ester hydrolase C1orf54                                           | Q9H0W9     | 0.4108              | 0.5797              | -3.31               | 0.5752              | 0.8114              | -1.75               | 0.5661              | 0.7295              | -0.19      | 0.5388   | 0.6896 | 0.89  | 0.2938 | 0.4746 | -1.88 | 0.9510 | 1.1055 | 0.09  | 0.2994 | 0.5563 | -0.18 | 0.0026 | 0.0420 | -0.69  | 0.0288 | 0.1450 | -0.71 |
| 1622 Esterase CVCA2                                                    | Q8WZ82     | 0.0935              | 0.2151              | 0.38                | 0.1080              | 0.4685              | 0.68                | 0.4932              | 0.7142              | 0.13       | 0.5871   | 0.6361 | 0.12  | 0.1475 | 0.3233 | 0.33  | 0.3782 | 0.5867 | -0.17 | 0.3736 | 0.4707 | -2.55 | 87808  | 0.9795 | -0.33  | 0.0651 | 0.1281 | 2.06  |
| 1623 Estrogen receptor beta                                            | Q92731     | 0.3415              | 0.5492              | 0.09                | 0.1646              | 0.6604              | 0.28                | 0.0083              | 0.0430              | 0.46       | 0.0005   | 0.0124 | 0.47  | 0.0054 | 0.0548 | -0.20 | 0.0937 | 0.2250 | 0.37  | 0.3736 | 0.5364 | -2.55 | 87808  | 1.0996 | -0.33  | 0.0651 | 0.1582 | 2.06  |
| 1624 Ethanolamine-phosphate cytidylyltransferase                       | Q99447     | 0.1350              | 0.2786              | -0.13               | 0.2028              | 0.6599              | -0.13               | 0.1047              | 0.2116              | 0.10       | 0.4686   | 0.6680 | -0.09 | 0.0223 | 0.1074 | -0.19 | 0.2193 | 0.4007 | -0.07 | 0.9562 | 0.9644 | -0.03 | 0.8497 | 1.2911 | 0.17   | 0.3206 | 0.3920 | 0.56  |
| 1625 Ethylmalonyl-CoA decarboxylase                                    | Q9NTX5     | 0.4108              | 0.5795              | -3.31               | 0.5752              | 0.8112              | -1.75               | 0.5661              | 0.7293              | -0.19      | 0.5388   | 0.6895 | 0.89  | 0.2938 | 0.4744 | -1.88 | 0.9510 | 1.1053 | 0.09  | 0.0015 | 0.0505 | 7.24  | 0.0016 | 0.0329 | 7.97   | 0.0017 | 0.0495 | 8.70  |
| 1626 ETS domain-containing protein Elk-4                               | P28324     | 0.1770              | 0.3393              | -0.26               | 0.4439              | 0.7795              | -0.13               | 0.2767              | 0.4510              | 0.32       | 0.6797   | 0.7200 | -0.07 | 0.2804 | 0.5068 | -0.19 | 0.8616 | 1.0974 | -0.03 | 0.3736 | 0.4354 | -2.55 | 87808  | 0.9133 | -0.33  | 0.0651 | 0.1137 | 2.06  |
| 1627 ETS translocation variant 3                                       | P41162     | 0.2015              | 0.3722              | -0.26               | 0.0052              | 0.3741              | -0.24               | 0.3391              | 0.5316              | -0.11      | 0.0005   | 0.0117 | -0.44 | 0.0050 | 0.0532 | -0.35 | 0.0663 | 0.1805 | -0.19 | 0.3736 | 0.5510 | -2.55 | 87808  | 1.1260 | -0.33  | 0.0651 | 0.1657 | 2.06  |
| 1628 ETS translocation variant 5                                       | P41161     | 0.2674              | 0.4593              | 0.06                | 0.3515              | 0.7046              | 0.10                | 0.0788              | 0.1705              | 0.12       | 0.5184   | 0.7234 | 0.04  | 0.2048 | 0.4065 | 0.07  | 0.8277 | 1.0615 | -0.01 | 0.7805 | 0.8145 | 0.04  | 0.6070 | 1.0387 | 0.09   | 0.9142 | 0.9311 | 0.01  |
| 1629 ETS-related transcription factor E1f-4                            | Q96067     | 0.0269              | 0.0994              | -0.25               | 0.1006              | 0.6332              | 0.38                | 0.7255              | 0.7695              | 0.03       | 0.1159   | 0.2170 | 0.27  | 0.2178 | 0.4235 | 0.16  | 0.1323 | 0.2833 | -0.13 | 0.1352 | 0.3133 | -0.81 | 0.5123 | 0.9315 | -0.15  | 0.7621 | 0.8038 | -0.03 |
| 1630 Eukaryotic initiation factor 4A-I                                 | P60842     | 0.0197              | 0.0823              | 0.21                | 0.2934              | 0.6701              | 0.22                | 0.0042              | 0.0321              | 0.33       | 0.0097   | 0.0397 | 0.27  | 0.5493 | 0.6331 | -0.01 | 0.0161 | 0.0842 | 0.27  | 0.0558 | 0.1873 | 0.35  | 0.0657 | 0.2472 | 0.25   | 0.4785 | 0.5487 | 0.06  |
| 1631 Eukaryotic initiation factor 4A-II                                | Q14240     | 0.7008              | 0.7546              | -0.04               | 0.1813              | 0.6646              | -0.19               | 0.0937              | 0.1941              | -0.26      | 0.1301   | 0.2366 | -0.23 | 0.2523 | 0.4706 | -0.15 | 0.6393 | 0.8765 | -0.05 | 0.8739 | 0.8953 | 0.01  | 0.0533 | 0.2191 | 0.15   | 0.2301 | 0.3003 | 0.06  |
| 1632 Eukaryotic initiation factor 4A-III                               | P38919     | 0.0698              | 0.1764              | 0.12                | 0.3450              | 0.7028              | 0.16                | 0.2455              | 0.0774              | 0.22       | 0.0074   | 0.0349 | 0.24  | 0.2143 | 0.4191 | -0.06 | 0.0563 | 0.1622 | 0.13  | 0.0080 | 0.0427 | 0.35  | 0.0080 | 0.0449 | 0.0009 | 0.0382 | 0.49   |       |
| 1633 Eukaryotic peptide chain release factor GTP-binding subunit ERF3A | P15170     | 0.4719              | 0.5480              | 0.04                | 0.4847              | 0.8091              | 0.12                | 0.0691              | 0.1557              | 0.15       | 0.0928</ |        |       |        |        |       |        |        |       |        |        |       |        |        |        |        |        |       |

Supplementary Table S2. Overview on all relatively quantified 5180 proteins statistical analysis

| Protein name                                       | UniProt    | MCF-7               |                     |                     |                     | MDA-MB-231          |                     |                     |                     |            |        |        |       |        |          |       |        |        |       |        |        |       |        |        |       |        |        |       |
|----------------------------------------------------|------------|---------------------|---------------------|---------------------|---------------------|---------------------|---------------------|---------------------|---------------------|------------|--------|--------|-------|--------|----------|-------|--------|--------|-------|--------|--------|-------|--------|--------|-------|--------|--------|-------|
|                                                    |            | Dai SC20 vs control | Gen SC20 vs control | SSE SC20 vs control | Dai IC20 vs control | Gen IC20 vs control | SSE IC20 vs control | Dai IC20 vs control | Gen IC20 vs control |            |        |        |       |        |          |       |        |        |       |        |        |       |        |        |       |        |        |       |
| p value                                            | BH q value | log2FC              | p value             | BH q value          | log2FC              | p value             | BH q value          | log2FC              | p value             | BH q value | log2FC |        |       |        |          |       |        |        |       |        |        |       |        |        |       |        |        |       |
| 1672 Eukaryotic translation initiation factor 6    | P56537     | 0.0027              | 0.0351              | 0.22                | 0.1880              | 0.6675              | 0.25                | 0.0039              | 0.0318              | 0.20       | 0.0015 | 0.0176 | 0.29  | 0.0457 | 0.1575   | 0.09  | 0.0081 | 0.0669 | 0.19  | 0.4160 | 0.4718 | -0.09 | 0.0163 | 0.1082 | -0.26 | 0.0140 | 0.1024 | -0.29 |
| 1673 EVI5-like protein                             | Q96CNA     | 0.0198              | 0.0826              | 0.28                | 0.0534              | 0.5848              | 0.37                | 0.0025              | 0.0279              | 0.44       | 0.0034 | 0.0236 | 0.41  | 0.0058 | 0.0563   | 0.30  | 0.0326 | 0.0132 | 0.22  | 0.3736 | 0.5782 | -2.55 | 0.8708 | 1.1744 | -0.33 | 0.0651 | 0.1803 | -2.06 |
| 1674 Exocyst complex component 1                   | Q9NV70     | 0.2793              | 0.4726              | -0.07               | 0.3135              | 0.6803              | -0.17               | 0.9395              | 0.9529              | -0.01      | 0.4314 | 0.6240 | -0.02 | 0.8533 | 0.8870   | 0.01  | 0.1280 | 0.2774 | 0.02  | 0.3736 | 0.5250 | -2.55 | 0.8708 | 1.0791 | -0.33 | 0.0651 | 0.1527 | 2.06  |
| 1675 Exocyst complex component 4                   | Q96A65     | 0.0031              | 0.0368              | 0.15                | 0.2666              | 0.6633              | 0.22                | 0.0004              | 0.0190              | 0.36       | 0.0062 | 0.0316 | 0.18  | 0.5789 | 0.6576   | 0.01  | 0.0249 | 0.1005 | 0.28  | 0.3736 | 0.1527 | 0.34  | 0.9969 | 0.9975 | -0.00 | 0.5366 | 0.6923 | 0.05  |
| 1676 Exocyst complex component 5                   | Q90471     | 0.1470              | 0.2951              | 0.06                | 0.4865              | 0.8106              | 0.04                | 0.1466              | 0.2741              | -0.16      | 0.4409 | 0.6351 | 0.03  | 0.2143 | 0.4189   | -0.06 | 0.1506 | 0.3082 | -0.06 | 0.3736 | 0.5165 | -2.55 | 0.8708 | 1.0636 | -0.33 | 0.0651 | 0.1486 | 2.06  |
| 1677 Exocyst complex component 6B                  | Q9Y2D4     | 0.4108              | 0.5789              | -3.31               | 0.5752              | 0.8103              | -1.75               | 0.5661              | 0.7285              | -1.19      | 0.5388 | 0.6888 | 0.89  | 0.2938 | 0.4738   | -1.88 | 0.9510 | 1.1043 | 0.09  | 0.3034 | 0.1476 | 0.49  | 0.0067 | 0.0667 | 0.91  | 0.0996 | 0.0872 | 0.35  |
| 1678 Exocyst complex component 7                   | Q9UPT5     | 0.9528              | 0.9647              | -0.00               | 0.8342              | 0.8804              | -0.02               | 0.4990              | 0.7212              | -0.06      | 0.1502 | 0.2655 | 0.12  | 0.0130 | 0.0812   | -0.22 | 0.0265 | 0.1044 | 0.18  | 0.3736 | 0.5847 | -2.55 | 0.8708 | 1.1858 | -0.33 | 0.0651 | 0.1840 | 2.06  |
| 1679 Exocyst complex component 8                   | Q8YVJ6     | 0.0108              | 0.0599              | -0.19               | 0.3500              | 0.7049              | -0.19               | 0.0038              | 0.0315              | 0.22       | 0.0051 | 0.0289 | -0.29 | 0.0113 | 0.0761   | -0.14 | 0.0479 | 0.1459 | 0.43  | 0.0241 | 0.1373 | 0.56  | 0.2339 | 0.5335 | 0.16  | 0.0107 | 0.0907 | 0.27  |
| 1680 Exonuclease 3'-5' domain-containing protein 2 | Q9NVH0     | 0.0355              | 0.1177              | -0.26               | 0.0372              | 0.5506              | -0.27               | 0.1466              | 0.2742              | -0.15      | 0.5272 | 0.7335 | -0.05 | 0.0748 | 0.2101   | -0.19 | 0.5441 | 0.7766 | -0.05 | 0.3736 | 0.4572 | -2.55 | 0.8708 | 0.9543 | -0.33 | 0.0651 | 0.1224 | 2.06  |
| 1681 Exosome complex component CSL4                | Q9Y3B2     | 0.0236              | 0.0923              | 0.43                | 0.6138              | 0.7145              | 0.06                | 0.0040              | 0.0317              | 0.23       | 0.3366 | 0.5107 | 0.03  | 0.0026 | 0.0392   | -0.38 | 0.2074 | 0.3870 | -0.16 | 0.1769 | 0.3763 | -0.17 | 0.6772 | 1.1165 | -0.05 | 0.0579 | 0.2142 | -0.34 |
| 1682 Exosome complex component MTR3                | Q5RKY6     | 0.4108              | 0.5787              | -3.31               | 0.5752              | 0.8101              | -1.75               | 0.5661              | 0.7284              | -1.19      | 0.5388 | 0.6886 | 0.89  | 0.2938 | 0.4737   | -1.88 | 0.9510 | 1.1040 | 0.09  | 0.0417 | 0.1674 | 0.25  | 0.5773 | 0.4293 | -0.23 | 0.4895 | 0.5578 | 0.09  |
| 1683 Exosome complex component RRP42               | Q15024     | 0.0527              | 0.1489              | 0.14                | 0.6638              | 0.7524              | -0.06               | 0.0177              | 0.0635              | 0.21       | 0.4485 | 0.6437 | 0.05  | 0.9812 | 0.9860   | 0.00  | 0.4380 | 0.6597 | 0.09  | 0.5748 | 0.6243 | 0.23  | 0.2764 | 0.6121 | 0.49  | 0.1835 | 0.2509 | 0.66  |
| 1684 Exosome complex component RRP45               | Q06265     | 0.4108              | 0.5786              | -3.31               | 0.5752              | 0.8099              | -1.75               | 0.5661              | 0.7282              | -1.19      | 0.5388 | 0.6885 | 0.89  | 0.2938 | 0.4735   | -1.88 | 0.9510 | 1.1038 | 0.09  | 0.9586 | 0.9659 | 0.00  | 0.4180 | 0.8100 | 0.12  | 0.9422 | 0.9536 | -0.01 |
| 1685 Exosome complex exonuclease RRP44             | Q9Y2L1     | 0.0777              | 0.1908              | -0.08               | 0.0016              | 0.2072              | 0.21                | 0.0013              | 0.0240              | 0.32       | 0.0076 | 0.0354 | 0.15  | 0.0109 | 0.0746   | 0.28  | 0.0104 | 0.0702 | 0.14  | 0.2224 | 0.4457 | 0.04  | 0.1494 | 0.4165 | 0.09  | 0.0223 | 0.1268 | 0.02  |
| 1686 Exosome component 10                          | Q01780     | 0.0050              | 0.0436              | 0.24                | 0.5607              | 0.8748              | -0.07               | 0.0276              | 0.0836              | 0.15       | 0.2326 | 0.3765 | 0.11  | 0.0602 | 0.1846   | 0.12  | 0.0226 | 0.0963 | 0.24  | 0.4092 | 0.4649 | 0.03  | 0.0711 | 0.2581 | -0.08 | 0.0441 | 0.1838 | -0.36 |
| 1687 Exosome RNA helicase MTR4                     | P42285     | 0.1760              | 0.3380              | -0.06               | 0.7642              | 0.8295              | -0.03               | 0.2301              | 0.3895              | 0.07       | 0.2940 | 0.4572 | 0.04  | 0.0279 | 0.1213   | -0.10 | 0.7854 | 1.0237 | -0.02 | 0.0316 | 0.1503 | 0.58  | 0.2032 | 0.5024 | 0.15  | 0.0095 | 0.0869 | 0.39  |
| 1688 Exostosin-like 3                              | O43909     | 0.0053              | 0.0444              | -0.15               | 0.1140              | 0.6325              | 0.28                | 0.1440              | 0.2704              | 0.19       | 0.5026 | 0.7063 | -0.02 | 0.8347 | 0.8717   | -0.01 | 0.0026 | 0.0545 | -0.23 | 0.3736 | 0.6412 | -2.55 | 0.8708 | 1.2844 | -0.33 | 0.0651 | 0.2188 | 2.06  |
| 1689 Exportin-1                                    | I14980     | 0.0593              | 0.1610              | 0.06                | 0.1834              | 0.6643              | 0.18                | 0.0086              | 0.0438              | 0.13       | 0.0072 | 0.0344 | 0.13  | 0.0380 | 0.1423   | -0.07 | 0.1677 | 0.3322 | 0.04  | 0.0256 | 0.1397 | 0.25  | 0.0523 | 0.2169 | 0.17  | 0.5414 | 0.6070 | 0.03  |
| 1690 Exportin-2                                    | P55060     | 0.0098              | 0.0581              | 0.14                | 0.2475              | 0.6585              | 0.21                | 0.0086              | 0.0438              | 0.22       | 0.0031 | 0.0228 | 0.31  | 0.2216 | 0.4285   | 0.04  | 0.0714 | 0.1885 | 0.20  | 0.0640 | 0.1992 | 0.39  | 0.4581 | 0.8632 | 0.09  | 0.6877 | 0.7408 | -0.03 |
| 1691 Exportin-5                                    | Q9HVA9     | 0.0068              | 0.0492              | 0.22                | 0.1990              | 0.6650              | 0.27                | 0.0006              | 0.0193              | 0.38       | 0.0023 | 0.0208 | 0.27  | 0.6539 | 0.7207   | 0.02  | 0.0335 | 0.0979 | 0.15  | 0.9062 | 0.9237 | -0.01 | 0.6986 | 1.1419 | 0.02  | 0.0038 | 0.0600 | 0.40  |
| 1692 Exportin-7                                    | Q9U1U9     | 0.1130              | 0.2448              | 0.12                | 0.0920              | 0.6304              | 0.15                | 0.2911              | 0.3757              | 0.06       | 0.0446 | 0.1059 | 0.09  | 0.6507 | 0.7184   | 0.02  | 0.7136 | 0.9539 | -0.01 | 0.3736 | 0.4446 | -2.55 | 0.8708 | 0.9306 | -0.33 | 0.0651 | 0.1173 | 2.06  |
| 1693 Exportin-T                                    | Q43592     | 0.0111              | 0.0606              | 0.14                | 0.1807              | 0.6638              | 0.13                | 0.0153              | 0.0582              | 0.12       | 0.0124 | 0.0450 | 0.15  | 0.0391 | 0.1446   | -0.09 | 0.3440 | 0.5597 | 0.03  | 0.0008 | 0.0410 | -1.73 | 0.0038 | 0.0503 | -0.58 | 0.0749 | 0.1247 | -1.21 |
| 1694 Extended synaptotagmin-1                      | Q9BSJ8     | 0.0098              | 0.0586              | 0.18                | 0.2319              | 0.6632              | 0.19                | 0.0074              | 0.0407              | 0.19       | 0.0397 | 0.0980 | 0.12  | 0.1088 | 0.2679   | -0.07 | 0.0803 | 0.2037 | 0.21  | 0.1290 | 0.3029 | 0.12  | 0.4187 | 0.8111 | 0.05  | 0.3252 | 0.3965 | 0.06  |
| 1695 Extended synaptotagmin-2                      | ADFR83     | 0.1458              | 0.2936              | -0.08               | 0.5338              | 0.8990              | -0.02               | 0.2721              | 0.4456              | -0.06      | 0.5314 | 0.7390 | -0.03 | 0.2687 | 0.4906   | -0.06 | 0.9906 | 0.9925 | 0.00  | 0.1012 | 0.2572 | -0.18 | 0.0862 | 0.2909 | 0.15  | 0.0819 | 0.1332 | 0.18  |
| 1696 Ezrin                                         | P15311     | 0.2490              | 0.4355              | -0.07               | 0.2910              | 0.6640              | 0.16                | 0.0878              | 0.1855              | 0.13       | 0.1535 | 0.2701 | 0.09  | 0.1277 | 0.2953   | -0.11 | 0.1921 | 0.3662 | 0.09  | 0.0398 | 0.1641 | 0.53  | 0.1869 | 0.4769 | 0.17  | 0.6200 | 0.6783 | 0.04  |
| 1697 FACT complex subunit SPT16                    | Q9Y5B9     | 0.0010              | 0.0223              | 0.31                | 0.1438              | 0.6594              | 0.27                | 0.0062              | 0.0382              | 0.30       | 0.0011 | 0.0157 | 0.30  | 0.0430 | 0.1532   | 0.10  | 0.0040 | 0.0597 | 0.25  | 0.0246 | 0.1388 | 0.40  | 0.0623 | 0.2389 | 0.20  | 0.8406 | 0.8729 | 0.01  |
| 1698 FACT complex subunit SSRP1                    | Q08945     | 0.0277              | 0.1008              | 0.07                | 0.1658              | 0.6606              | 0.16                | 0.0010              | 0.0213              | 0.18       | 0.0084 | 0.0372 | 0.10  | 0.0450 | 0.1562   | -0.05 | 0.0352 | 0.1210 | 0.07  | 0.1258 | 0.2985 | 0.19  | 0.9220 | 0.9427 | 0.01  | 0.0389 | 0.1702 | -0.26 |
| 1699 F-actin-capping protein subunit alpha-1       | P52907     | 0.8353              | 0.8687              | -0.01               | 0.5636              | 0.8770              | 0.05                | 0.3627              | 0.5602              | 0.05       | 0.3899 | 0.5766 | -0.04 | 0.1397 | 0.3114   | -0.08 | 0.1616 | 0.3231 | 0.08  | 0.0638 | 0.1988 | 0.20  | 0.2369 | 0.5530 | -0.08 | 0.8465 | 0.8761 | -0.01 |
| 1700 F-actin-capping protein subunit alpha-2       | P47755     | 0.8277              | 0.8620              | 0.22                | 0.9554              | 0.9704              | -0.06               | 0.5547              | 0.7791              | -0.62      | 0.7855 | 0.8156 | -0.27 | 0.1729 | 0.3617   | 1.82  | 0.7483 | 0.9866 | -0.32 | 0.0142 | 0.1116 | -0.32 | 0.0076 | 0.0720 | -0.42 | 0.0220 | 0.1265 | -0.39 |
| 1701 F-actin-capping protein subunit beta          | P47756     | 0.0997              | 0.2244              | -0.05               | 0.2120              | 0.6263              | 0.20                | 0.0076              | 0.0414              | -0.14      | 0.0031 | 0.0228 | 0.17  | 0.1091 | 0.2682   | 0.05  | 0.0283 | 0.1076 | 0.13  | 0.0784 | 0.2224 | 0.31  | 0.0836 | 0.2847 | 0.17  | 0.0277 | 0.1428 | 0.24  |
| 1702 FAD synthase                                  | Q8NFF5     | 0.0162              | 0.0743              | 0.21                | 0.2656              | 0.6627              | 0.18                | 0.0293              | 0.0870              | 0.14       | 0.0008 | 0.0142 | 0.43  | 0.0083 | 0.0657   | 0.22  | 0.0011 | 0.0471 | 0.49  | 0.3736 | 0.6485 | -2.55 | 0.8708 | 1.2969 | -0.33 | 0.0651 | 0.2238 | 2.06  |
| 1703 FAD-linked sulphydryl oxidase ALR             | P55789     | 0.0098              | 0.0580              | -0.24               | 0.1555              | 0.6619              | 0.31                | 0.0315              | 0.0907              | 0.32       | 0.0052 | 0.0290 | 0.43  | 0.0997 | 0.2528   | 0.12  | 0.9300 | 1.1673 | 0.01  | 0.3736 | 0.4327 | -2.55 | 0.8708 | 0.9081 | -0.33 | 0.0651 | 0.1126 | 2.06  |
| 1704 Fanconi anemia group A protein                | O15360     | 0.4108              | 0.5784              | -3.31               | 0.5752              | 0.8097              | -1.75               | 0.5661              | 0.7280              | -1.19      | 0.5388 | 0.6883 | 0.89  | 0.2938 | 0.4734   | -1.88 | 0.9510 | 1.1035 | 0.09  | 0.1697 | 0.3658 | -0.27 | 0.1863 | 0.4766 | 0.36  | 0.0157 | 0.1071 | 0.50  |
| 1705 Fanconi anemia group C protein                | Q00597     | 0.8870              | 0.9109              | 0.00                | 0.0668              | 0.5935              | -0.07               | 0.4830              | 0.7032              | -0.02      | 0.2328 | 0.3767 | 0.04  | 0.3572 | 0.4550   | -0.05 | 0.0167 | 0.0848 | 0.28  | 0.0148 | 0.1121 | 0.48  | 0.2533 | 0.5778 | 0.23  | 0.1713 | 0.2371 | 0.82  |
| 1706 Fanconi anemia group I protein                | Q9NVJ7     | 0.0391              | 0.1244              | 0.07                | 0.1307              | 0.6460              | 0.35                | 0.0102              | 0.0471              | 0.34       | 0.0021 | 0.0200 | 0.46  | 0.0004 | 0.0176   | 0.28  | 0.1094 | 0.2489 | 0.34  | 0.0664 | 0.2027 | 0.40  | 0.2986 | 0.6418 | 0.17  | 0.2270 | 0.2973 | -0.21 |
| 1707 Fanconi anemia group M protein                | Q8YD88     | 0.3826              | 0.5988              | 0.02                | 0.5849              | 0.6914              | 0.07                | 0.0013              | 0.0220              | 0.20       | 0.0010 | 0.0156 | 0.15  | 0.3575 | 0.4550   | 0.01  | 0.0020 | 0.0518 | 0.14  | 0.0023 | 0.0576 | -0.36 | 0.8650 | 1.3075 | -0.03 | 0.4511 | 0.5197 | -0.03 |
| 1708 Far upstream element-binding protein 1        | Q96A64     | 0.0646              | 0.1682              | 0.11                | 0.3731              | 0.7209              | 0.17                | 0.0089              | 0.0441              | 0.28       | 0.0111 | 0.0240 | 0.20  | 0.6249 | 0.6961   | -0.02 | 0.0413 | 0.1336 | 0.15  | 0.0953 | 0.2487 | 0.36  | 0.8313 | 1.2740 | -0.02 | 0.4654 | 0.5318 | -0.06 |
| 1709 Far upstream element-binding protein 2        | Q92945     | 0.3246              | 0.5301              | 0.05                | 0.3319              | 0.6910              | 0.19                | 0.0141              | 0.0556              | 0.21       | 0.0140 | 0.0482 | 0.21  | 0.6359 | 0.7058   | -0.02 | 0.0662 | 0.1806 | 0.14  | 0.1587 | 0.3102 | 0.21  | 0.0257 | 0.1438 | 0.22  | 0.1910 | 0.1771 | 0.14  |
| 1710 Far upstream element-binding protein 3        | Q06Z24     | 0.1208              | 0.2567              | 0.06                | 0.1846              | 0.6645              | 0.23                | 0.0079              | 0.0419              | 0.19       | 0.0025 | 0.0212 | 0.22  | 0.8885 | 0.9146</ |       |        |        |       |        |        |       |        |        |       |        |        |       |

Supplementary Table S2. Overview on all relatively quantified 5180 proteins statistical analysis

| Protein name                                                    | UniProt    | MCF-7               |                     |                     |                     | MDA-MB-231          |                     |                     |                     |            |        |        |       |        |        |       |        |        |       |        |        |       |        |        |       |        |        |       |
|-----------------------------------------------------------------|------------|---------------------|---------------------|---------------------|---------------------|---------------------|---------------------|---------------------|---------------------|------------|--------|--------|-------|--------|--------|-------|--------|--------|-------|--------|--------|-------|--------|--------|-------|--------|--------|-------|
|                                                                 |            | Dai SC20 vs control | Gen SC20 vs control | SSE SC20 vs control | Dai IC20 vs control | Gen IC20 vs control | SSE IC20 vs control | Dai IC20 vs control | Gen IC20 vs control |            |        |        |       |        |        |       |        |        |       |        |        |       |        |        |       |        |        |       |
| p value                                                         | BH q value | log2FC              | p value             | BH q value          | log2FC              | p value             | BH q value          | log2FC              | p value             | BH q value | log2FC |        |       |        |        |       |        |        |       |        |        |       |        |        |       |        |        |       |
| 1752 Filamin A-interacting protein 1-like                       | Q4L180     | 0.4108              | 0.5764              | -3.31               | 0.5752              | 0.8068              | -1.75               | 0.5661              | 0.7257              | -1.19      | 0.5388 | 0.6861 | 0.89  | 0.2938 | 0.4715 | -1.88 | 0.9510 | 1.1003 | 0.09  | 0.3230 | 0.5885 | -0.09 | 0.0014 | 0.0297 | -0.49 | 0.0047 | 0.0676 | -0.62 |
| 1753 Filamin-A                                                  | P21333     | 0.0014              | 0.0256              | 0.41                | 0.1575              | 0.8617              | 0.36                | 0.0008              | 0.0216              | -0.12      | 0.0002 | 0.0115 | 0.62  | 0.0030 | 0.0418 | 0.39  | 0.0037 | 0.0595 | 0.59  | 0.0804 | 0.0257 | 0.38  | 0.5964 | 1.0298 | 0.06  | 0.9860 | 0.9891 | 0.00  |
| 1754 Filamin-A-interacting protein 1                            | Q7Z7B0     | 0.2593              | 0.4480              | -0.19               | 0.4044              | 0.7476              | -0.44               | 0.0298              | 0.0876              | -0.53      | 0.0585 | 0.1291 | -0.41 | 0.8304 | 0.8683 | 0.03  | 0.6481 | 0.8851 | 0.09  | 0.0229 | 0.1363 | 0.30  | 0.0106 | 0.0845 | 0.24  | 0.3262 | 0.3976 | 0.05  |
| 1755 Filamin-B                                                  | Q75369     | 0.0144              | 0.0699              | 0.26                | 0.1790              | 0.6477              | 0.27                | 0.0036              | 0.0317              | 0.36       | 0.0034 | 0.0235 | -0.36 | 0.0225 | 0.1081 | 0.24  | 0.0114 | 0.0733 | 0.37  | 0.0431 | 0.1682 | 0.47  | 0.2809 | 0.6184 | 0.13  | 0.6135 | 0.6730 | 0.04  |
| 1756 Filamin-binding LIM protein 1                              | Q8W1P2     | 0.4108              | 0.5762              | -3.31               | 0.5752              | 0.8066              | -1.75               | 0.5661              | 0.7255              | -1.19      | 0.5388 | 0.6859 | 0.89  | 0.2938 | 0.4713 | -1.88 | 0.9510 | 1.1001 | 0.09  | 0.0493 | 0.1770 | 0.42  | 0.2854 | 0.6238 | 0.12  | 0.2738 | 0.3458 | 0.10  |
| 1757 Filamin-C                                                  | Q14315     | 0.4108              | 0.5761              | -3.31               | 0.5752              | 0.8064              | -1.75               | 0.5661              | 0.7253              | -1.19      | 0.5388 | 0.6857 | 0.89  | 0.2938 | 0.4712 | -1.88 | 0.9510 | 1.0998 | 0.09  | 0.0010 | 0.0411 | 0.40  | 0.0046 | 0.0550 | 0.31  | 0.0053 | 0.0704 | 0.24  |
| 1758 FK506-binding protein 15                                   | Q1T1M5     | 0.2533              | 0.4406              | 0.12                | 0.0747              | 0.6123              | 0.24                | 0.0526              | 0.1297              | 0.24       | 0.1469 | 0.2608 | 0.15  | 0.5568 | 0.6398 | 0.05  | 0.4061 | 0.6224 | 0.07  | 0.3736 | 0.4688 | -2.55 | 0.8708 | 0.9759 | -0.33 | 0.0651 | 0.1273 | 2.06  |
| 1759 Flap endonuclease 1                                        | P39748     | 0.4423              | 0.5199              | 0.03                | 0.2279              | 0.6602              | 0.10                | 0.0057              | 0.0365              | 0.22       | 0.0303 | 0.0809 | 0.15  | 0.0123 | 0.0794 | -0.18 | 0.5121 | 0.7389 | 0.02  | 0.0396 | 0.1640 | 0.18  | 0.8775 | 0.9071 | -0.01 | 0.0661 | 0.1126 | 0.14  |
| 1760 Flavin reductase (NADPH)                                   | P30043     | 0.0001              | 0.0126              | 0.39                | 0.1168              | 0.6355              | 0.29                | 0.1898              | 0.3364              | 0.10       | 0.0152 | 0.0508 | 0.27  | 0.8487 | 0.8837 | 0.00  | 0.0334 | 0.1177 | 0.33  | 0.1400 | 0.3206 | -0.18 | 0.0058 | 0.0612 | -0.46 | 0.0048 | 0.0676 | -0.65 |
| 1761 Flotillin-1                                                | Q75955     | 0.4108              | 0.5759              | -3.31               | 0.5752              | 0.8062              | -1.75               | 0.5661              | 0.7251              | -1.19      | 0.5388 | 0.6856 | 0.89  | 0.2938 | 0.4710 | -1.88 | 0.9510 | 1.0996 | 0.09  | 0.0004 | 0.0357 | -1.12 | 0.0011 | 0.0285 | -1.42 | 0.0010 | 0.0395 | -1.51 |
| 1762 FLYWCH family member 2                                     | Q96CP2     | 0.0240              | 0.0931              | -0.16               | 0.1993              | 0.8398              | 0.11                | 0.3420              | 0.5351              | -0.05      | 0.6759 | 0.7167 | -0.02 | 0.0041 | 0.0469 | -0.02 | 0.2998 | 0.1108 | -0.12 | 0.0777 | 0.2218 | 0.23  | 0.0688 | 0.2533 | 0.12  | 0.1488 | 0.2113 | 0.09  |
| 1763 FLYWCH-type zinc finger-containing protein 1               | Q4VC44     | 0.0029              | 0.0363              | -0.55               | 0.0111              | 0.4291              | 0.28                | 0.0047              | 0.0338              | 0.32       | 0.0101 | 0.0404 | 0.40  | 0.2496 | 0.4668 | 0.07  | 0.1314 | 0.2823 | -0.18 | 0.3736 | 0.5237 | -2.55 | 0.8708 | 1.0768 | -0.33 | 0.0651 | 0.1520 | 2.06  |
| 1764 Folate receptor beta                                       | P14207     | 0.0950              | 0.2172              | 0.25                | 0.0279              | 0.5036              | 0.51                | 0.0360              | 0.0994              | 0.39       | 0.8506 | 0.8711 | 0.03  | 0.2036 | 0.4049 | 0.37  | 0.1511 | 0.3086 | -0.19 | 0.3736 | 0.5159 | -2.55 | 0.8708 | 1.0626 | -0.33 | 0.0651 | 0.1483 | 2.06  |
| 1765 Foliculin-interacting protein 1                            | Q8TF40     | 0.0592              | 0.1610              | 0.15                | 0.0658              | 0.5938              | 0.23                | 0.0251              | 0.0787              | 0.18       | 0.1037 | 0.1992 | 0.12  | 0.0860 | 0.2290 | 0.12  | 0.4733 | 0.6969 | 0.04  | 0.3736 | 0.4624 | -2.55 | 0.8708 | 0.9640 | -0.33 | 0.0651 | 0.1246 | 2.06  |
| 1766 Foliculin-interacting protein 2                            | Q9P278     | 0.3672              | 0.5808              | 0.28                | 0.2042              | 0.6594              | 0.45                | 0.1029              | 0.2090              | 0.65       | 0.5055 | 0.7092 | 0.23  | 0.0496 | 0.1642 | 0.87  | 0.6359 | 0.8733 | 0.14  | 0.3736 | 0.4490 | -2.55 | 0.8708 | 0.9390 | -0.33 | 0.0651 | 0.1191 | 2.06  |
| 1767 Follistatin                                                | P19883     | 0.0031              | 0.0367              | -0.17               | 0.4227              | 0.7600              | -0.14               | 0.0700              | 0.1572              | -0.16      | 0.3256 | 0.4975 | 0.06  | 0.0008 | 0.0211 | -0.14 | 0.3823 | 0.5920 | -0.07 | 0.1113 | 0.2747 | -0.19 | 0.0364 | 0.1786 | -0.30 | 0.0001 | 0.0199 | -6.56 |
| 1768 Follistatin-related protein 1                              | Q12841     | 0.4108              | 0.5757              | -3.31               | 0.5752              | 0.8059              | -1.75               | 0.5661              | 0.7249              | -1.19      | 0.5388 | 0.6854 | 0.89  | 0.2938 | 0.4709 | -1.88 | 0.9510 | 1.0993 | 0.09  | 0.0104 | 0.1018 | -0.51 | 0.0165 | 0.1092 | -0.56 | 0.0003 | 0.0239 | -0.78 |
| 1769 Follitropin subunit beta                                   | P01225     | 0.3832              | 0.5995              | 0.07                | 0.2659              | 0.6625              | 0.20                | 0.9089              | 0.9281              | -0.01      | 0.1216 | 0.2252 | 0.12  | 0.3140 | 0.4113 | -0.09 | 0.5609 | 0.7958 | 0.03  | 0.0200 | 0.1311 | -7.28 | 0.0908 | 0.3002 | -4.10 | 0.1002 | 0.1558 | -4.68 |
| 1770 Poly(hydroxybutyrate) synthase mitochondrial               | O05932     | 0.4108              | 0.5756              | -3.31               | 0.5752              | 0.8057              | -1.75               | 0.5661              | 0.7248              | -1.19      | 0.5388 | 0.6852 | 0.89  | 0.2938 | 0.4707 | -1.88 | 0.9510 | 1.0991 | 0.09  | 0.3873 | 0.4433 | 0.11  | 0.0601 | 0.2344 | 0.15  | 0.5310 | 0.5972 | -0.03 |
| 1771 Forkhead box protein D4-like 1                             | Q9NU39     | 0.0297              | 0.1057              | 0.24                | 0.8444              | 0.8883              | 0.02                | 0.0008              | 0.0199              | 0.46       | 0.4247 | 0.6169 | 0.13  | 0.0794 | 0.2174 | -0.20 | 0.3967 | 0.6101 | 0.09  | 0.3736 | 0.4695 | -2.55 | 0.8708 | 0.9772 | -0.33 | 0.0651 | 0.1275 | 2.06  |
| 1772 Forkhead box protein M1                                    | Q08050     | 0.4108              | 0.5754              | -3.31               | 0.5752              | 0.8055              | -1.75               | 0.5661              | 0.7246              | -1.19      | 0.5388 | 0.6851 | 0.89  | 0.2938 | 0.4706 | -1.88 | 0.9510 | 1.0989 | 0.09  | 0.2074 | 0.4230 | -0.19 | 0.0046 | 0.0544 | -0.62 | 0.0065 | 0.0757 | -0.92 |
| 1773 Formin-1                                                   | Q68DA7     | 0.0345              | 0.1163              | 0.16                | 0.8584              | 0.8977              | -0.01               | 0.0023              | 0.0263              | 0.58       | 0.0002 | 0.0108 | 0.38  | 0.0033 | 0.0435 | 0.36  | 0.0213 | 0.0944 | 0.23  | 0.0526 | 0.1815 | -0.24 | 0.0012 | 0.0285 | -0.21 | 0.0081 | 0.0805 | 0.13  |
| 1774 Formin-2                                                   | Q9NZ66     | 0.0767              | 0.1891              | -10.53              | 0.0661              | 0.5944              | -8.98               | 0.0230              | 0.0746              | -8.42      | 0.0014 | 0.0169 | -6.34 | 0.0058 | 0.0564 | -9.11 | 0.0075 | 0.0653 | -7.14 | 0.0000 | 0.0612 | 8.72  | 0.0029 | 0.0454 | 9.17  | 0.0030 | 0.0551 | 9.67  |
| 1775 Four and a half LIM domains protein 1                      | Q13642     | 0.4108              | 0.5753              | -3.31               | 0.5752              | 0.8053              | -1.75               | 0.5661              | 0.7244              | -1.19      | 0.5388 | 0.6849 | 0.89  | 0.2938 | 0.4704 | -1.88 | 0.9510 | 1.0986 | 0.09  | 0.0781 | 0.2222 | 0.20  | 0.8157 | 1.2605 | -0.01 | 0.1230 | 0.1821 | -0.08 |
| 1776 Four and a half LIM domains protein 2                      | Q14192     | 0.4108              | 0.5751              | -3.31               | 0.5752              | 0.8051              | -1.75               | 0.5661              | 0.7242              | -1.19      | 0.5388 | 0.6847 | 0.89  | 0.2938 | 0.4703 | -1.88 | 0.9510 | 1.0984 | 0.09  | 0.0128 | 0.1069 | 0.50  | 0.0807 | 0.2794 | 0.21  | 0.0051 | 0.0686 | 0.69  |
| 1777 Four and a half LIM domains protein 5                      | Q3TD97     | 0.0671              | 0.1716              | 0.12                | 0.0875              | 0.6209              | 0.36                | 0.0103              | 0.0473              | 0.44       | 0.0005 | 0.0123 | 0.44  | 0.0027 | 0.0401 | 0.40  | 0.0069 | 0.0645 | 0.26  | 0.3736 | 0.6225 | -2.55 | 0.8708 | 1.2519 | -0.33 | 0.0651 | 0.2066 | 2.06  |
| 1778 Fragile X mental retardation syndrome-related protein 1    | P51114     | 0.0058              | 0.0460              | 0.17                | 0.1622              | 0.6616              | 0.20                | 0.0008              | 0.0215              | 0.34       | 0.0047 | 0.0279 | 0.17  | 0.3677 | 0.4647 | 0.02  | 0.0186 | 0.0881 | 0.25  | 0.0239 | 0.1373 | 0.34  | 0.6312 | 1.0678 | 0.03  | 0.5380 | 0.6037 | 0.03  |
| 1779 Fragile X mental retardation syndrome-related protein 2    | P51116     | 0.2745              | 0.4674              | -0.07               | 0.3996              | 0.7432              | 0.15                | 0.0158              | 0.0592              | 0.18       | 0.8493 | 0.8700 | -0.01 | 0.0022 | 0.0362 | 0.26  | 0.0509 | 0.1519 | -0.05 | 0.1853 | 0.3866 | 0.17  | 0.0737 | 0.2635 | 0.25  | 0.0557 | 0.2091 | 0.33  |
| 1780 Free fatty acid receptor 2                                 | O15552     | 0.2850              | 0.4804              | -0.06               | 0.7380              | 0.8096              | -0.05               | 0.0752              | 0.1647              | 0.17       | 0.2098 | 0.3456 | 0.08  | 0.0660 | 0.1955 | -0.14 | 0.1506 | 0.3083 | 0.09  | 0.3736 | 0.5166 | -2.55 | 0.8708 | 1.0639 | -0.33 | 0.0651 | 0.1486 | 2.06  |
| 1781 Fructose-1,6-bisphosphatase 1                              | P09467     | 0.7514              | 0.7976              | -0.01               | 0.2333              | 0.6588              | 0.25                | 0.4875              | 0.7076              | -0.04      | 0.2689 | 0.4247 | -0.06 | 0.0330 | 0.1327 | -0.19 | 0.2117 | 0.3932 | -0.07 | 0.3736 | 0.5003 | -2.55 | 0.8708 | 1.0341 | -0.33 | 0.0651 | 0.1410 | 2.06  |
| 1782 Fructose-1,6-bisphosphatase isozyme 2                      | O00757     | 0.3094              | 0.5104              | -0.40               | 0.2510              | 0.6607              | 0.22                | 0.5057              | 0.7281              | 0.05       | 0.4435 | 0.6380 | 0.03  | 0.0235 | 0.1107 | -0.17 | 0.2254 | 0.4085 | -0.10 | 0.3736 | 0.4966 | -2.55 | 0.8708 | 1.0273 | -0.33 | 0.0651 | 0.1393 | 2.06  |
| 1783 Fructose-2,6-bisphosphatase TIGAR                          | Q9NQ88     | 0.0025              | 0.0337              | 0.33                | 0.1665              | 0.6431              | 0.45                | 0.0011              | 0.0217              | 0.67       | 0.0002 | 0.0113 | 0.54  | 0.0568 | 0.1784 | 0.11  | 0.0043 | 0.0604 | 0.47  | 0.0657 | 0.2017 | 0.40  | 0.8026 | 1.2459 | 0.02  | 0.1862 | 0.2536 | 0.10  |
| 1784 Fructose-bisphosphate aldolase A                           | P04075     | 0.0098              | 0.0579              | 0.36                | 0.1565              | 0.6623              | 0.28                | 0.0039              | 0.0319              | 0.43       | 0.0016 | 0.0177 | 0.56  | 0.0404 | 0.1479 | 0.21  | 0.0044 | 0.0605 | 0.72  | 0.0541 | 0.1847 | 0.47  | 0.9423 | 0.9584 | 0.01  | 0.9163 | 0.9318 | -0.01 |
| 1785 Fructose-bisphosphate aldolase B                           | P05062     | 0.4605              | 0.5374              | -0.02               | 0.9300              | 0.9562              | -0.01               | 0.0199              | 0.0679              | 0.25       | 0.1794 | 0.3044 | 0.13  | 0.1912 | 0.3872 | 0.09  | 0.2837 | 0.4799 | 0.10  | 0.3909 | 0.4466 | 0.11  | 0.5808 | 0.9496 | -0.12 | 0.0955 | 0.1502 | -0.38 |
| 1786 Fructose-bisphosphate aldolase C                           | P09972     | 0.0087              | 0.0551              | 0.23                | 0.1956              | 0.6688              | 0.30                | 0.0013              | 0.0230              | 0.39       | 0.0002 | 0.0111 | 0.62  | 0.0126 | 0.0803 | 0.21  | 0.0007 | 0.0432 | 0.67  | 0.0049 | 0.0740 | 0.36  | 0.2215 | 0.5292 | 0.11  | 0.0227 | 0.1274 | 0.29  |
| 1787 Fumarate hydratase mitochondrial                           | P07954     | 0.0044              | 0.0420              | -0.38               | 0.2395              | 0.6617              | -0.19               | 0.0046              | 0.0334              | -0.45      | 0.0084 | 0.0372 | -0.39 | 0.0984 | 0.2505 | -0.16 | 0.0061 | 0.0620 | -0.42 | 0.0343 | 0.1542 | 0.27  | 0.2834 | 0.6210 | 0.10  | 0.2235 | 0.2935 | 0.12  |
| 1788 Fumarylacetoacetate hydrolase domain-containing protein 2A | Q96GK7     | 0.3406              | 0.5486              | 0.18                | 0.1976              | 0.6699              | -0.32               | 0.0731              | 0.1618              | 0.36       | 0.2035 | 0.3371 | 0.30  | 0.0419 | 0.1512 | 0.48  | 0.1883 | 0.3613 | 0.67  | 0.3736 | 0.5052 | -2.55 | 0.8708 | 1.0429 | -0.33 | 0.0651 | 0.1433 | 2.06  |
| 1789 Fumarylacetoacetate hydrolase domain-containing protein 2B | Q6P213     | 0.4108              | 0.5750              | -3.31               | 0.5752              | 0.8048              | -1.75               | 0.5661              | 0.7240              | -1.19      | 0.5388 | 0.6846 | 0.89  | 0.2938 | 0.4702 | -1.88 | 0.9510 | 1.0981 | 0.09  | 0.3457 | 0.6188 | 0.24  | 0.8607 | 1.3025 | 0.04  | 0.2113 | 0.2800 | 0.35  |
| 1790 FYXD domain-containing ion transport regulator 3           | Q14802     | 0.0238              | 0.0926              | -0.17               | 0.1767              | 0.6                 |                     |                     |                     |            |        |        |       |        |        |       |        |        |       |        |        |       |        |        |       |        |        |       |



Supplementary Table S2. Overview on all relatively quantified 5180 proteins statistical analysis

| Protein name                                                                            | UniProt    | MCF-7               |            |                     |         | MDA-MB-231          |            |                     |         |
|-----------------------------------------------------------------------------------------|------------|---------------------|------------|---------------------|---------|---------------------|------------|---------------------|---------|
|                                                                                         |            | Dai SC20 vs control |            | Gen SC20 vs control |         | Dai IC20 vs control |            | Gen IC20 vs control |         |
|                                                                                         |            | p value             | BH q value | log2FC              | p value | p value             | BH q value | log2FC              | p value |
| 1832 General transcription factor IIF subunit 2                                         | P13984     | 0.4998              | 0.5735     | -0.04               | 0.4936  | 0.07                | 0.0776     | 0.1685              | -0.14   |
| 1833 General transcription factor II-I                                                  | P78347     | 0.9213              | 0.9400     | 0.01                | 0.9531  | 0.9688              | -0.01      | 0.1288              | 0.2494  |
| 1834 General transcription factor II-I repeat domain-containing protein 2B              | Q6EKJO     | 0.0038              | 0.0394     | 0.29                | 0.1499  | 0.6603              | 0.13       | 0.3661              | 0.0995  |
| 1835 General vesicular transport factor p115                                            | O60763     | 0.0050              | 0.0453     | 0.27                | 0.1562  | 0.6627              | 0.24       | 0.0099              | 0.0211  |
| 1836 Genuylipyl transferase type-2 subunit alpha                                        | Q92696     | 0.1102              | 0.2410     | 0.09                | 0.6183  | 0.7172              | 0.08       | 0.0446              | 0.1155  |
| 1837 Genuylipyl transferase type-2 subunit beta                                         | P33611     | 0.1331              | 0.2740     | -0.11               | 0.4703  | 0.7998              | 0.10       | 0.0238              | 0.0756  |
| 1838 Germ cell-less protein-like-2                                                      | Q8NEA9     | 0.4108              | 0.5739     | -3.31               | 0.5752  | 0.8033              | -1.75      | 0.5661              | 0.7228  |
| 1839 Germinal-center associated nuclear protein                                         | O60318     | 0.0763              | 0.1883     | -1.32               | 0.4881  | 0.8117              | -0.43      | 0.0814              | 0.1751  |
| 1840 Gigaxonin                                                                          | Q9H2C0     | 0.0001              | 0.0123     | -5.53               | 0.2189  | 0.6604              | -4.12      | 0.0087              | 0.0439  |
| 1841 Girdin                                                                             | Q3V6T2     | 0.0417              | 0.1294     | 0.14                | 0.1055  | 0.6318              | 0.18       | 0.0073              | 0.0405  |
| 1842 Glia maturation factor beta                                                        | P60983     | 0.6390              | 0.7008     | 0.02                | 0.1938  | 0.6679              | 0.08       | 0.0046              | 0.0334  |
| 1843 Glial fibrillary acidic protein                                                    | P14136     | 0.0223              | 0.0891     | 0.38                | 0.9428  | 0.9621              | -0.01      | 0.1289              | 0.2494  |
| 1844 GLIPR1-like protein 2                                                              | Q4G1C9     | 0.1737              | 0.3351     | 0.99                | 0.3164  | 0.6801              | 0.68       | 0.1721              | 0.3130  |
| 1845 Glucocorticoid modulatory element-binding protein 2                                | Q9UKD1     | 0.7433              | 0.7918     | -0.13               | 0.9866  | 0.9904              | 0.01       | 0.5115              | 0.7325  |
| 1846 Glucosamine 6-phosphate N-acetyltransferase                                        | Q96EK6     | 0.0267              | 0.0989     | 0.14                | 0.1511  | 0.6594              | 0.08       | 0.6389              | 0.6918  |
| 1847 Glucosamine-6-phosphate isomerase 1                                                | P46926     | 0.0142              | 0.0697     | 0.25                | 0.0073  | 0.4023              | -0.25      | 0.0088              | 0.0440  |
| 1848 Glucose-6-phosphate 1-dehydrogenase                                                | P11413     | 0.0032              | 0.0371     | 0.39                | 0.2549  | 0.6625              | 0.24       | 0.0017              | 0.0234  |
| 1849 Glucose-6-phosphate isomerase                                                      | P06744     | 0.0428              | 0.1312     | 0.18                | 0.1753  | 0.6608              | 0.29       | 0.0105              | 0.0478  |
| 1850 Glucose-fructose oxidoreductase domain-containing protein 3                        | Q3B7J2     | 0.4108              | 0.5737     | -3.31               | 0.5752  | 0.8031              | -1.75      | 0.5661              | 0.7226  |
| 1851 Glucose-induced degradation protein 8 homolog                                      | Q9NWU2     | 0.1588              | 0.3135     | -0.03               | 0.9730  | 0.9573              | 0.02       | 0.4477              | 0.6927  |
| 1852 Glucosidase 2 subunit beta                                                         | P14314     | 0.0144              | 0.0698     | 0.26                | 0.2812  | 0.6651              | 0.24       | 0.0286              | 0.0857  |
| 1853 Glutamate dehydrogenase 1 mitochondrial                                            | P00367     | 0.2304              | 0.4115     | 0.06                | 0.2944  | 0.6715              | 0.17       | 0.0444              | 0.1152  |
| 1854 Glutamate dehydrogenase 2 mitochondrial                                            | P49448     | 0.4829              | 0.5575     | 0.03                | 0.3221  | 0.7041              | 0.10       | 0.0066              | 0.0392  |
| 1855 Glutamate receptor ionotropic NMDA 2A                                              | Q12879     | 0.3084              | 0.5092     | 0.08                | 0.3577  | 0.6860              | -0.08      | 0.0347              | 0.0969  |
| 1856 Glutamate-cysteine ligase regulatory subunit                                       | P48507     | 0.4108              | 0.5736     | -3.31               | 0.5752  | 0.8030              | -1.75      | 0.5661              | 0.7224  |
| 1857 Glutamate-rich protein 4                                                           | A6NGS2     | 0.4261              | 0.5036     | -0.02               | 0.9992  | 0.6369              | -0.23      | 0.0078              | 0.0417  |
| 1858 Glutamate-rich protein 6B                                                          | Q5W0A0     | 0.4843              | 0.5588     | -0.28               | 0.4584  | 0.8095              | -0.52      | 0.3680              | 0.5655  |
| 1859 Glutamate-rich WD repeat-containing protein 1                                      | Q9BQ67     | 0.1702              | 0.3298     | 0.14                | 0.1068  | 0.6308              | -0.23      | 0.0258              | 0.0800  |
| 1860 Glutamine kinase isoform mitochondrial                                             | Q94925     | 0.5286              | 0.5999     | 0.04                | 0.7233  | 0.7978              | -0.03      | 0.9606              | 0.9681  |
| 1861 Glutamine amidotransferase-like class 1 domain-containing protein 3B mitochondrial | A0A0B4J2D5 | 0.0836              | 0.1994     | -0.16               | 0.6169  | 0.4583              | -0.27      | 0.3258              | 0.5142  |
| 1862 Glutamine-fructose-6-phosphate aminotransferase [isomerizing] 1                    | Q06210     | 0.0217              | 0.0876     | 0.16                | 0.2066  | 0.6602              | 0.21       | 0.0064              | 0.0387  |
| 1863 Glutamine-fructose-6-phosphate aminotransferase [isomerizing] 2                    | Q94808     | 0.3676              | 0.5811     | 0.03                | 0.2749  | 0.6651              | 0.19       | 0.0644              | 0.1481  |
| 1864 Glutamine-rich protein 1                                                           | Q2TAL8     | 0.4108              | 0.5734     | -3.31               | 0.5752  | 0.8027              | -1.75      | 0.5661              | 0.7223  |
| 1865 Glutamine-tRNA ligase                                                              | P47897     | 0.2538              | 0.4413     | 0.05                | 0.4652  | 0.7966              | 0.10       | 0.1403              | 0.2653  |
| 1866 Glutathyl-RNA(Gln) amidotransferase subunit A mitochondrial                        | Q9H0R6     | 0.4108              | 0.5733     | -3.31               | 0.5752  | 0.8025              | -1.75      | 0.5661              | 0.7221  |
| 1867 Glutathyl-RNA(Gln) amidotransferase subunit C mitochondrial                        | Q43716     | 0.4108              | 0.5731     | -3.31               | 0.5752  | 0.8022              | -1.75      | 0.5661              | 0.7219  |
| 1868 Glutaredoxin-3                                                                     | O76003     | 0.0001              | 0.0120     | 0.17                | 0.3413  | 0.6999              | 0.09       | 0.0074              | 0.0406  |
| 1869 Glutaredoxin-related protein 5 mitochondrial                                       | Q86S56     | 0.9794              | 0.9863     | 0.00                | 0.6676  | 0.7556              | -0.07      | 0.0877              | 0.1853  |
| 1870 Glutathione peroxidase 2                                                           | P18283     | 0.2837              | 0.4785     | 0.12                | 0.2848  | 0.9368              | 0.13       | 0.9148              | 0.9321  |
| 1871 Glutathione peroxidase 6                                                           | P59796     | 0.0007              | 0.0208     | 0.70                | 0.8641  | 0.9017              | -0.12      | 0.0770              | 0.1676  |
| 1872 Glutathione reductase mitochondrial                                                | P00390     | 0.0199              | 0.0829     | 0.20                | 0.2432  | 0.6596              | 0.20       | 0.0249              | 0.0783  |
| 1873 Glutathione S-transferase kappa 1                                                  | Q9Y2Q3     | 0.2742              | 0.4675     | -0.06               | 0.9380  | 0.9580              | 0.01       | 0.5631              | 0.7873  |
| 1874 Glutathione S-transferase LANCE1                                                   | O43813     | 0.0971              | 0.2205     | 0.14                | 0.0964  | 0.6345              | 0.20       | 0.3643              | 0.5615  |
| 1875 Glutathione S-transferase Mu 1                                                     | P09488     | 0.0345              | 0.1163     | 0.44                | 0.2528  | 0.6624              | -0.16      | 0.2886              | 0.4675  |
| 1876 Glutathione S-transferase Mu 2                                                     | P28161     | 0.0466              | 0.1383     | -0.18               | 0.1342  | 0.6497              | 0.23       | 0.9179              | 0.9350  |
| 1877 Glutathione S-transferase Mu 3                                                     | P21266     | 0.0001              | 0.0118     | 0.60                | 0.2470  | 0.6592              | 0.24       | 0.1631              | 0.2991  |
| 1878 Glutathione S-transferase Mu 4                                                     | P46439     | 0.0322              | 0.1116     | 0.36                | 0.4687  | 0.7963              | 0.13       | 0.3876              | 0.5890  |
| 1879 Glutathione S-transferase omega-1                                                  | P78417     | 0.0207              | 0.0850     | 0.21                | 0.1788  | 0.6644              | 0.25       | 0.0045              | 0.0332  |
| 1880 Glutathione S-transferase P                                                        | P09211     | 0.4108              | 0.5730     | -3.31               | 0.5752  | 0.8020              | -1.75      | 0.5661              | 0.7217  |
| 1881 Glutathione S-transferase theta-4                                                  | A0A1W2PR19 | 0.2728              | 0.4658     | -0.32               | 0.6280  | 0.7098              | -0.26      | 0.0850              | 0.1810  |
| 1882 Glutathione synthetase                                                             | P48637     | 0.0775              | 0.1905     | 0.16                | 0.4259  | 0.7618              | 0.14       | 0.4671              | 0.6845  |
| 1883 Glyceraldehyde-3-phosphate dehydrogenase                                           | P04406     | 0.0000              | 0.0000     | 0.53                | 0.1523  | 0.6607              | 0.16       | 0.0010              | 0.0215  |
| 1884 Glyceraldehyde-3-phosphate dehydrogenase testis-specific                           | O14556     | 0.1003              | 0.2255     | -8.96               | 0.0912  | 0.6290              | -7.40      | 0.0313              | 0.0905  |
| 1885 Glycero-3-phosphate dehydrogenase [NAD(+) ] cytoplasmic                            | P21695     | 0.4108              | 0.5728     | -3.31               | 0.5752  | 0.8018              | -1.75      | 0.5661              | 0.7216  |
| 1886 Glycero-3-phosphate dehydrogenase mitochondrial                                    | P43304     | 0.4990              | 0.5727     | -0.04               | 0.7213  | 0.7960              | -0.05      | 0.6905              | 0.7389  |
| 1887 Glycero-3-phosphate phosphatase                                                    | A6NDG6     | 0.0461              | 0.1372     | 0.09                | 0.2588  | 0.7999              | 0.06       | 0.0152              | 0.0579  |
| 1888 Glycine cleavage system H protein mitochondrial                                    | P23434     | 0.0382              | 0.1228     | 0.13                | 0.9450  | 0.9636              | -0.02      | 0.0244              | 0.0772  |
| 1889 Glycine receptor subunit alpha-2                                                   | P23416     | 0.4108              | 0.5726     | -3.31               | 0.5752  | 0.8016              | -1.75      | 0.5661              | 0.7214  |
| 1890 Glycine receptor subunit alpha-3                                                   | Q75311     | 0.0063              | 0.0477     | 0.12                | 0.9118  | 0.9382              | 0.01       | 0.0094              | 0.0179  |
| 1891 Glycine-tRNA ligase                                                                | P41250     | 0.0061              | 0.0470     | 0.27                | 0.2282  | 0.6600              | 0.17       | 0.0014              | 0.0225  |
| 1892 Glycogen [starch] synthase muscle                                                  | P13807     | 0.1018              | 0.2278     | 0.09                | 0.1916  | 0.6692              | 0.24       | 0.0186              | 0.0655  |
| 1893 Glycogen debranching enzyme                                                        | P35573     | 0.4108              | 0.5725     | -3.31               | 0.5752  | 0.8014              | -1.75      | 0.5661              | 0.7212  |
| 1894 Glycogen phosphorylase brain form                                                  | P11216     | 0.0229              | 0.0905     | 0.20                | 0.2605  | 0.6644              | 0.17       | 0.0426              | 0.1121  |
| 1895 Glycogen phosphorylase liver form                                                  | P06737     | 0.0284              | 0.1024     | 0.22                | 0.2800  | 0.6650              | 0.22       | 0.0109              | 0.0484  |
| 1896 Glycogen phosphorylase muscle form                                                 | P11217     | 0.8089              | 0.8460     | 0.02                | 0.9337  | 0.9885              | 0.00       | 0.1149              | 0.2280  |
| 1897 Glycogen synthase kinase-3 alpha                                                   | P49840     | 0.0002              | 0.0152     | 0.60                | 0.2584  | 0.6630              | 0.21       | 0.0002              | 0.0167  |
| 1898 Glycogen synthase kinase-3 beta                                                    | P49841     | 0.0119              | 0.0628     | 0.14                | 0.7948  | 0.8512              | 0.03       | 0.4615              | 0.6778  |
| 1899 Glycophorin-1                                                                      | P46976     | 0.0004              | 0.0168     | -0.68               | 0.0242  | 0.4859              | -0.20      | 0.0005              | 0.0216  |
| 1900 Glycophorin-A                                                                      | P02724     | 0.4108              | 0.5723     | -3.31               | 0.5752  | 0.8012              | -1.75      | 0.5661              | 0.7210  |
| 1901 Glycosylmethyltransferase                                                          | Q75063     | 0.7433              | 0.7916     | 0.04                | 0.2943  | 0.6718              | 0.16       | 0.0719              | 0.8125  |
| 1902 Glycosylmethyltransferase 1                                                        | P30419     | 0.5174              | 0.5897     | -0.09               | 0.1853  | 0.6666              | 0.30       | 0.1232              | 0.2416  |
| 1903 Glycylpeptide N-tetradecanoyltransferase 2                                         | O60551     | 0.1851              | 0.3499     | 0.11                | 0.0466  | 0.5240              | 0.22       | 0.8738              | 0.9002  |
| 1904 Glyoxalase domain-containing protein 4                                             | Q9HC38     | 0.0080              | 0.0529     | 0.21                | 0.3739  | 0.7616              | 0.08       | 0.0561              | 0.1353  |
| 1905 Glyoxylate reductase/hydroxypruvate reductase                                      | Q9UBQ7     | 0.4108              | 0.5722     | -3.31               | 0.5752  | 0.8010              | -1.75      | 0.5661              | 0.7208  |

Supplementary Table S2. Overview on all relatively quantified 5180 proteins statistical analysis

| Protein name                                                                    | UniProt | MCF-7               |            |                     |         | MDA-MB-231          |        |                     |            |
|---------------------------------------------------------------------------------|---------|---------------------|------------|---------------------|---------|---------------------|--------|---------------------|------------|
|                                                                                 |         | Dai SC20 vs control |            | Gen SC20 vs control |         | Dai IC20 vs control |        | Gen IC20 vs control |            |
|                                                                                 |         | p value             | BH q value | log2FC              | p value | BH q value          | log2FC | p value             | BH q value |
| 1906 GMP reductase 2                                                            | Q9P2T1  | 0.4108              | 0.5720     | -3.31               | 0.5752  | 0.8007              | -1.75  | 0.5661              | 0.7207     |
| 1907 GMP synthase [glutamine-hydrolyzing]                                       | P49915  | 0.0373              | 0.1214     | 0.12                | 0.1215  | 0.6396              | 0.22   | 0.0007              | 0.2077     |
| 1908 Golgi apparatus protein 1                                                  | P29896  | 0.0661              | 0.1704     | 0.14                | 0.2284  | 0.6599              | 0.44   | 0.0136              | 0.0546     |
| 1909 Golgi membrane protein 1                                                   | Q8N8B4  | 0.0261              | 0.0978     | -1.48               | 0.2641  | 0.6638              | -2.25  | 0.0014              | 0.0224     |
| 1910 Golgi phosphoprotein 3                                                     | Q9H4A6  | 0.3449              | 0.6018     | -0.54               | 0.8574  | 0.8971              | -0.11  | 0.5033              | 0.7254     |
| 1911 Golgi assembly-stacking protein 2                                          | Q9H3Y8  | 0.7636              | 0.8077     | 0.02                | 0.7314  | 0.8042              | 0.05   | 0.5042              | 0.7263     |
| 1912 Golgi resident protein GCp60                                               | Q7H3P7  | 0.0382              | 0.1227     | 0.17                | 0.1443  | 0.6545              | 0.23   | 0.0034              | 0.0313     |
| 1913 Golgi SNAP receptor complex member 2                                       | Q14653  | 0.2589              | 0.4479     | 0.71                | 0.9832  | 0.9882              | 0.03   | 0.2133              | 0.3681     |
| 1914 Golgi to ER traffic protein 4 homolog                                      | Q7LSD6  | 0.1388              | 0.2834     | 0.06                | 0.2416  | 0.6594              | -0.09  | 0.0012              | 0.0226     |
| 1915 Golgin subfamily A member 1                                                | Q92805  | 0.7216              | 0.7723     | -0.02               | 0.5251  | 0.8439              | 0.11   | 0.1213              | 0.2388     |
| 1916 Golgin subfamily A member 2                                                | Q08379  | 0.0019              | 0.0303     | 0.23                | 0.0582  | 0.6593              | 0.15   | 0.0153              | 0.0581     |
| 1917 Golgin subfamily A member 3                                                | Q08378  | 0.0486              | 0.1417     | 0.08                | 0.3619  | 0.7104              | -0.06  | 0.0093              | 0.0449     |
| 1918 Golgin subfamily A member 4                                                | Q13439  | 0.0207              | 0.0850     | 0.05                | 0.2281  | 0.6601              | 0.16   | 0.0445              | 0.1154     |
| 1919 Golgin subfamily A member 5                                                | Q8TB66  | 0.2011              | 0.3718     | 0.04                | 0.1089  | 0.6296              | 0.22   | 0.0125              | 0.0525     |
| 1920 Golgin subfamily A member 8C                                               | A6NN73  | 0.4108              | 0.5719     | -3.31               | 0.5752  | 0.8005              | -1.75  | 0.5661              | 0.7205     |
| 1921 Golgin subfamily A member 8R                                               | J61899  | 0.4108              | 0.5717     | -3.31               | 0.5752  | 0.8003              | -1.75  | 0.5661              | 0.7203     |
| 1922 Golgin subfamily B member 1                                                | Q14789  | 0.0013              | 0.0252     | 0.22                | 0.0801  | 0.6111              | 0.25   | 0.0001              | 0.0216     |
| 1923 Golgi-specific brefeldin A-resistance guanine nucleotide exchange factor 1 | Q92538  | 0.0106              | 0.0596     | -0.13               | 0.3389  | 0.6986              | -0.07  | 0.7456              | 0.7880     |
| 1924 GON-4-like protein                                                         | Q23819  | 0.0647              | 0.1683     | 0.23                | 0.3788  | 0.7203              | 0.08   | 0.1549              | 0.2868     |
| 1925 G-patch domain and KOW motifs-containing protein                           | Q92877  | 0.0041              | 0.0044     | -0.39               | 0.0837  | 0.6203              | -0.43  | 0.0623              | 0.1451     |
| 1926 GPI transamidase component PG1-T                                           | Q696N2  | 0.2914              | 0.4888     | -0.13               | 0.2645  | 0.6638              | 0.14   | 0.3834              | 0.5843     |
| 1927 GPN-loop GTPase 1                                                          | Q9HCN4  | 0.2964              | 0.4948     | -2.20               | 0.2754  | 0.6638              | -1.99  | 0.3883              | 0.5899     |
| 1928 GPN-loop GTPase 3                                                          | Q9UHW5  | 0.4948              | 0.5692     | -0.44               | 0.2359  | 0.6629              | -1.48  | 0.1793              | 0.3226     |
| 1929 G-protein-signaling modulator 1                                            | Q86YR5  | 0.4108              | 0.5716     | -3.31               | 0.5752  | 0.8001              | -1.75  | 0.5661              | 0.7201     |
| 1930 G-protein-signaling modulator 2                                            | R81274  | 0.0629              | 0.1660     | -0.39               | 0.2649  | 0.6602              | -0.62  | 0.0224              | 0.0733     |
| 1931 Grancalcin                                                                 | P28676  | 0.0060              | 0.0468     | -0.25               | 0.7683  | 0.8319              | -0.04  | 0.0044              | 0.0326     |
| 1932 GRB10-interacting GYF protein 2                                            | Q6Y7W6  | 0.6269              | 0.6899     | 0.03                | 0.3984  | 0.7426              | 0.11   | 0.8691              | 0.8966     |
| 1933 GRB2-related adapter protein                                               | Q13588  | 0.0067              | 0.0492     | -3.31               | 0.1965  | 0.6692              | -2.24  | 0.0456              | 0.1176     |
| 1934 G-rich sequence factor 1                                                   | Q12849  | 0.0000              | 0.0000     | 1.00                | 0.0294  | 0.5093              | 0.20   | 0.0052              | 0.0354     |
| 1935 GRIP1-associated protein 1                                                 | Q4V328  | 0.2078              | 0.3804     | -0.06               | 0.7477  | 0.8171              | 0.02   | 0.3025              | 0.4854     |
| 1936 Growth arrest and DNA damage-inducible protein-interacting protein 1       | Q8TAE8  | 0.3021              | 0.5016     | 0.06                | 0.9771  | 0.9715              | 0.00   | 0.0597              | 0.1413     |
| 1937 Growth factor receptor-bound protein 2                                     | P62993  | 0.0558              | 0.1545     | 0.14                | 0.1909  | 0.6691              | 0.20   | 0.0043              | 0.0325     |
| 1938 Growth hormone-inducible transmembrane protein                             | Q9H3K2  | 0.4108              | 0.5714     | -3.31               | 0.5752  | 0.7999              | -1.75  | 0.5661              | 0.7200     |
| 1939 Growth/differentiation factor 5                                            | P43026  | 0.4279              | 0.5054     | -0.08               | 0.4859  | 0.8101              | -0.10  | 0.2616              | 0.4311     |
| 1940 Grp1 protein homolog 1 mitochondrial                                       | Q55040  | 0.8384              | 0.8708     | 0.01                | 0.5525  | 0.8680              | -0.07  | 0.0047              | 0.0334     |
| 1941 GTP-AMP phosphotransferase AK3 mitochondrial                               | Q9UJ07  | 0.1907              | 0.3570     | -0.07               | 0.8020  | 0.8571              | 0.06   | 0.6239              | 0.7677     |
| 1942 GTPase HRas                                                                | P01112  | 0.0490              | 0.1420     | 0.17                | 0.4683  | 0.7982              | 0.05   | 0.3491              | 0.5432     |
| 1943 GTPase IMAP family member 4                                                | Q9N1V9  | 0.2096              | 0.3823     | -0.39               | 0.6739  | 0.7609              | -0.09  | 0.0347              | 0.0968     |
| 1944 GTPase IMAP family member 5                                                | Q96F15  | 0.4108              | 0.5713     | -3.31               | 0.5752  | 0.7997              | -1.75  | 0.5661              | 0.7198     |
| 1945 GTPase KRas                                                                | P01116  | 0.6811              | 0.7379     | 0.03                | 0.5388  | 0.8546              | -0.09  | 0.2550              | 0.4230     |
| 1946 GTPase NRas                                                                | P01111  | 0.0409              | 0.1277     | 0.12                | 0.7380  | 0.8098              | 0.04   | 0.3200              | 0.5071     |
| 1947 GTPase-activating protein and VPS9 domain-containing protein 1             | Q14C86  | 0.0113              | 0.0610     | 0.20                | 0.2200  | 0.6599              | 0.26   | 0.0009              | 0.0209     |
| 1948 GTP-binding nuclear protein Ran                                            | P62826  | 0.0083              | 0.0540     | 0.34                | 0.2744  | 0.6645              | 0.28   | 0.0096              | 0.0457     |
| 1949 GTP-binding protein Rheb                                                   | Q15382  | 0.0339              | 0.1151     | 0.17                | 0.3238  | 0.6854              | 0.09   | 0.0162              | 0.0602     |
| 1950 GTP-binding protein Rhes                                                   | Q96D21  | 0.4108              | 0.5711     | -3.31               | 0.5752  | 0.7994              | -1.75  | 0.5661              | 0.7196     |
| 1951 GTP-binding protein Ral1                                                   | Q92963  | 0.4108              | 0.5710     | -3.31               | 0.5752  | 0.7992              | -1.75  | 0.5661              | 0.7194     |
| 1952 GTP-binding protein SAR1a                                                  | Q9NR31  | 0.2805              | 0.4739     | -0.04               | 0.3658  | 0.7140              | -0.13  | 0.2746              | 0.4484     |
| 1953 GTP-binding protein SAR1b                                                  | Q9Y6B6  | 0.0547              | 0.1531     | 0.07                | 0.0169  | 0.4607              | 0.12   | 0.0212              | 0.0706     |
| 1954 Guanine dinucleotide N-methyltransferase                                   | Q14353  | 0.4108              | 0.5708     | -3.31               | 0.5752  | 0.7990              | -1.75  | 0.5661              | 0.7193     |
| 1955 Guanine nucleotide exchange factor DBS                                     | Q15068  | 0.1685              | 0.3271     | -0.08               | 0.8854  | 0.9184              | 0.01   | 0.0705              | 0.1580     |
| 1956 Guanine nucleotide exchange factor VAV2                                    | P52735  | 0.1412              | 0.2871     | 0.23                | 0.0378  | 0.5547              | 0.42   | 0.0001              | 0.0247     |
| 1957 Guanine nucleotide-binding protein G(i) subunit alpha-1                    | P63096  | 0.0159              | 0.0734     | -0.60               | 0.1112  | 0.6323              | -0.56  | 0.0106              | 0.0480     |
| 1958 Guanine nucleotide-binding protein G(i) subunit alpha-2                    | P04899  | 0.0711              | 0.1789     | 0.16                | 0.5799  | 0.6617              | 0.12   | 0.0101              | 0.0468     |
| 1959 Guanine nucleotide-binding protein G(i)(G(s))/G(o) subunit gamma-12        | Q9UBI6  | 0.4108              | 0.5706     | -3.31               | 0.5752  | 0.7988              | -1.75  | 0.5661              | 0.7191     |
| 1960 Guanine nucleotide-binding protein G(i)(G(s)/G(t) subunit beta-1           | P62873  | 0.0359              | 0.1184     | 0.10                | 0.2915  | 0.6693              | 0.18   | 0.1649              | 0.3018     |
| 1961 Guanine nucleotide-binding protein G(i)(G(s)/G(t) subunit beta-2           | P62879  | 0.0127              | 0.0659     | 0.15                | 0.3439  | 0.7011              | 0.17   | 0.1518              | 0.2822     |
| 1962 Guanine nucleotide-binding protein G(i)(G(s)/G(t) subunit beta-3           | P16520  | 0.6980              | 0.7523     | -0.05               | 0.0859  | 0.6197              | 0.30   | 0.3031              | 0.4861     |
| 1963 Guanine nucleotide-binding protein G(k) subunit alpha                      | P08754  | 0.0809              | 0.1960     | -0.22               | 0.0107  | 0.4434              | -0.14  | 0.2313              | 0.3999     |
| 1964 Guanine nucleotide-binding protein G(o) subunit alpha                      | P09471  | 0.0376              | 0.1219     | 0.19                | 0.8615  | 0.9001              | 0.02   | 0.0408              | 0.1080     |
| 1965 Guanine nucleotide-binding protein G(o) subunit alpha                      | P38405  | 0.0157              | 0.0729     | 0.24                | 0.0116  | 0.4354              | 0.18   | 0.0647              | 0.1484     |
| 1966 Guanine nucleotide-binding protein G(s) subunit alpha isoforms XLas        | Q5JWF2  | 0.1757              | 0.3378     | 0.06                | 0.3256  | 0.6856              | 0.21   | 0.0220              | 0.0724     |
| 1967 Guanine nucleotide-binding protein G(i) subunit alpha-1                    | P11488  | 0.1629              | 0.3196     | -0.03               | 0.1822  | 0.6661              | 0.20   | 0.0406              | 0.1077     |
| 1968 Guanine nucleotide-binding protein G(i) subunit alpha-2                    | P19087  | 0.4381              | 0.5158     | -0.18               | 0.4108  | 0.7514              | -0.47  | 0.3302              | 0.5200     |
| 1969 Guanine nucleotide-binding protein G(i) subunit alpha-3                    | ASMTJ3  | 0.0003              | 0.0160     | 0.65                | 0.0225  | 0.4777              | 0.47   | 0.1254              | 0.3703     |
| 1970 Guanine nucleotide-binding protein G(s) subunit alpha-1                    | P29992  | 0.0659              | 0.1702     | 0.33                | 0.0189  | 0.4662              | 0.59   | 0.0131              | 0.0536     |
| 1971 Guanine nucleotide-binding protein subunit alpha-12                        | Q03113  | 0.4108              | 0.5705     | -3.31               | 0.5752  | 0.7986              | -1.75  | 0.5661              | 0.7189     |
| 1972 Guanine nucleotide-binding protein subunit alpha-13                        | Q14344  | 0.0476              | 0.1401     | 0.14                | 0.3045  | 0.6775              | 0.15   | 0.0466              | 0.0333     |
| 1973 Guanine nucleotide-binding protein subunit alpha-14                        | Q95837  | 0.4108              | 0.5703     | -3.31               | 0.5752  | 0.7984              | -1.75  | 0.5661              | 0.7187     |
| 1974 Guanine nucleotide-binding protein subunit beta-4                          | Q9HIAV  | 0.1045              | 0.2314     | -0.24               | 0.7538  | 0.8508              | -0.04  | 0.1006              | 0.2049     |
| 1975 Guanine nucleotide-binding protein subunit beta-5                          | O14775  | 0.1586              | 0.3132     | -0.09               | 0.1232  | 0.6401              | 0.13   | 0.5698              | 0.6276     |

Supplementary Table S2. Overview on all relatively quantified 5180 proteins statistical analysis

|      | Protein name                                                   | UniProt | MCF-7               |            |                     |         | MDA-MB-231          |        |                     |            |
|------|----------------------------------------------------------------|---------|---------------------|------------|---------------------|---------|---------------------|--------|---------------------|------------|
|      |                                                                |         | Dai SC20 vs control |            | Gen SC20 vs control |         | SSE SC20 vs control |        | Dai IC20 vs control |            |
|      |                                                                |         | p value             | BH q value | log2FC              | p value | BH q value          | log2FC | p value             | BH q value |
|      |                                                                |         | p value             | BH q value | log2FC              | p value | BH q value          | log2FC | p value             | BH q value |
| 1976 | Guanine nucleotide-binding protein-like 1                      | P36915  | 0.0079              | 0.0526     | 0.23                | 0.1870  | 0.6671              | 0.28   | 0.0008              | 0.0210     |
| 1977 | Guanylate kinase                                               | P16774  | 0.0642              | 0.1679     | 0.16                | 0.7042  | 0.7823              | 0.06   | 0.0233              | 0.0481     |
| 1978 | Guanylate-binding protein 2                                    | P32456  | 0.0336              | 0.1145     | 0.26                | 0.9807  | 0.9868              | -0.01  | 0.0140              | 0.0554     |
| 1979 | GUANR22                                                        | Q2090   | 0.3817              | -0.18      | 0.4149              | 0.7536  | -0.10               | 0.0266 | 0.0817              | -0.46      |
| 1980 | Guanthyl cyclase-activating protein 2                          | Q9UMX6  | 0.5257              | 0.5972     | -0.12               | 0.3132  | 0.6800              | -0.15  | 0.0213              | 0.0705     |
| 1981 | Halicoid dehalogenase-like hydrolase domain-containing 5       | Q9BXW7  | 0.0026              | 0.0342     | 0.33                | 0.2601  | 0.6644              | 0.14   | 0.0233              | 0.0265     |
| 1982 | Hamartin                                                       | Q92574  | 0.9682              | 0.9765     | 0.01                | 0.9763  | 0.9845              | 0.01   | 0.5504              | 0.7735     |
| 1983 | HAIUS augmin-like complex subunit 5                            | O94927  | 0.5284              | 0.5998     | -0.10               | 0.5316  | 0.8507              | -0.17  | 0.0086              | 0.0436     |
| 1984 | HBS1-like protein                                              | Q9Y450  | 0.1027              | 0.2293     | 0.13                | 0.4915  | 0.8144              | 0.08   | 0.5018              | 0.7244     |
| 1985 | HCLS1-associated protein X-1                                   | O00165  | 0.6582              | 0.7188     | 0.03                | 0.1043  | 0.6334              | 0.23   | 0.0937              | 0.1942     |
| 1986 | HD domain-containing protein 2                                 | Q7Z4H3  | 0.2698              | 0.4622     | 0.07                | 0.2722  | 0.6654              | 0.17   | 0.1151              | 0.2283     |
| 1987 | HEAT repeat-containing protein 3                               | Q7Z4Q2  | 0.4108              | 0.5702     | -3.31               | 0.5752  | 0.7982              | -1.75  | 0.5661              | 0.7185     |
| 1988 | HEAT repeat-containing protein 6                               | Q6A108  | 0.1745              | 0.3363     | -0.03               | 0.1553  | 0.6621              | 0.11   | 0.0012              | 0.0227     |
| 1989 | Heat shock 70 kDa protein 14                                   | Q0VD99  | 0.0879              | 0.2062     | -0.16               | 0.0342  | 0.5304              | -0.24  | 0.0975              | 0.1904     |
| 1990 | Heat shock 70 kDa protein 1A                                   | P0DMV8  | 0.0111              | 0.0605     | 0.37                | 0.1209  | 0.6606              | 0.34   | 0.0069              | 0.0397     |
| 1991 | Heat shock 70 kDa protein 1-like                               | P34931  | 0.0025              | 0.0336     | 0.77                | 0.1704  | 0.6413              | 0.88   | 0.0006              | 0.0199     |
| 1992 | Heat shock 70 kDa protein 4                                    | P34932  | 0.0031              | 0.0367     | 0.28                | 0.1099  | 0.6325              | 0.36   | 0.0002              | 0.0192     |
| 1993 | Heat shock 70 kDa protein 4L                                   | O95757  | 0.0228              | 0.0902     | 0.17                | 0.1613  | 0.6636              | 0.25   | 0.0081              | 0.0424     |
| 1994 | Heat shock 70 kDa protein 6                                    | P17066  | 0.5613              | 0.6297     | -0.04               | 0.0096  | 0.4480              | -0.33  | 0.1241              | 0.4238     |
| 1995 | Heat shock cognate 71 kDa protein                              | P11142  | 0.0142              | 0.0696     | 0.32                | 0.3066  | 0.6784              | 0.24   | 0.0038              | 0.0317     |
| 1996 | Heat shock protein 105 kDa                                     | Q92598  | 0.0242              | 0.0935     | 0.23                | 0.2159  | 0.6624              | 0.21   | 0.0029              | 0.0294     |
| 1997 | Heat shock protein 75 kDa mitochondrial                        | Q12931  | 0.0067              | 0.0492     | 0.20                | 0.3032  | 0.6761              | 0.16   | 0.0014              | 0.0222     |
| 1998 | Heat shock protein beta-1                                      | P04792  | 0.0249              | 0.0993     | 0.17                | 0.0923  | 0.6308              | 0.28   | 0.0031              | 0.0304     |
| 1999 | Heat shock protein HSP 90-alpha                                | P07900  | 0.0106              | 0.0595     | 0.34                | 0.2111  | 0.6623              | 0.29   | 0.0026              | 0.0279     |
| 2000 | Heat shock protein HSP 90-alpha A2                             | Q14568  | 0.6032              | 0.6686     | 0.04                | 0.4838  | 0.8084              | 0.06   | 0.1431              | 0.2694     |
| 2001 | Heat shock protein HSP 90-beta                                 | P08238  | 0.0070              | 0.0497     | 0.34                | 0.1933  | 0.6684              | 0.36   | 0.0023              | 0.0267     |
| 2002 | Heat shock-related 70 kDa protein 2                            | P54652  | 0.9884              | 0.9915     | 0.00                | 0.2538  | 0.6630              | 0.11   | 0.0672              | 0.1525     |
| 2003 | Helicase MOV-10                                                | Q9HCE1  | 0.5325              | 0.6034     | -0.03               | 0.1794  | 0.6647              | 0.19   | 0.3189              | 0.5064     |
| 2004 | Helicase SKI2W                                                 | Q15477  | 0.1768              | 0.3392     | -0.09               | 0.2355  | 0.6578              | -0.10  | 0.5555              | 0.7796     |
| 2005 | Helicase SRCAP                                                 | Q6ZRS2  | 0.4108              | 0.5700     | -3.31               | 0.5752  | 0.7979              | -1.75  | 0.5661              | 0.7184     |
| 2006 | Helicase with zinc finger domain 2                             | Q9BYK8  | 0.0401              | 0.1262     | 0.32                | 0.0811  | 0.6142              | 0.28   | 0.0064              | 0.0389     |
| 2007 | Helicase-like transcription factor                             | Q14527  | 0.5494              | 0.6185     | 0.05                | 0.0386  | 0.5570              | -0.25  | 0.1522              | 0.2829     |
| 2008 | Helix-loop-helix protein 2                                     | Q02577  | 0.4108              | 0.5699     | -3.31               | 0.5752  | 0.7977              | -1.75  | 0.5661              | 0.7182     |
| 2009 | Hematopoietically-expressed homeobox protein HHEX              | Q30314  | 0.0000              | 0.0000     | 0.64                | 0.1477  | 0.6573              | 0.30   | 0.0144              | 0.0565     |
| 2010 | Heme oxygenase 1                                               | P09601  | 0.4108              | 0.5697     | -3.31               | 0.5752  | 0.7975              | -1.75  | 0.5661              | 0.7180     |
| 2011 | Heme oxygenase 2                                               | P30519  | 0.0506              | 0.1455     | 0.15                | 0.2180  | 0.6611              | 0.30   | 0.0223              | 0.0731     |
| 2012 | Heme-binding protein 1                                         | Q0N1V9  | 0.0516              | 0.1471     | -0.26               | 0.1991  | 0.6650              | -0.33  | 0.0615              | 0.1441     |
| 2013 | Heme-binding protein 2                                         | Q9Y5Z4  | 0.0556              | 0.1540     | 0.13                | 0.0073  | 0.3980              | 0.26   | 0.0725              | 0.1609     |
| 2014 | Hemectin-2                                                     | Q8NDA2  | 0.0402              | 0.1264     | 0.13                | 0.4243  | 0.7608              | 0.05   | 0.0194              | 0.0670     |
| 2015 | Hemogen                                                        | Q9BXL5  | 0.8150              | 0.8513     | 0.02                | 0.8141  | 0.8670              | 0.02   | 0.2560              | 0.4241     |
| 2016 | Hemoglobin subunit alpha                                       | P69905  | 0.0070              | 0.0496     | 0.56                | 0.0830  | 0.6204              | 0.62   | 0.1835              | 0.3282     |
| 2017 | Hemoglobin subunit delta                                       | P20242  | 0.1601              | 0.3150     | 0.17                | 0.0639  | 0.7097              | 0.65   | 0.9297              | 0.9456     |
| 2018 | Heparan-sulfate 6-O-sulfotransferase 1                         | O60243  | 0.4108              | 0.5696     | -3.31               | 0.5752  | 0.7973              | -1.75  | 0.5661              | 0.7178     |
| 2019 | Heparan-sulfate 6-O-sulfotransferase 2                         | Q96MM7  | 0.1629              | 0.3195     | 0.14                | 0.082   | 0.6782              | 0.11   | 0.7525              | 0.7944     |
| 2020 | Hepatocyte growth factor-regulated tyrosine kinase substrate   | O14964  | 0.0002              | 0.0150     | 0.84                | 0.0097  | 0.4486              | 0.27   | 0.0004              | 0.0238     |
| 2021 | Hepatocyte nuclear factor 4-gamma                              | Q14541  | 0.4108              | 0.5694     | -3.31               | 0.5752  | 0.7971              | -1.75  | 0.5661              | 0.7177     |
| 2022 | Hepatoma-derived growth factor                                 | P51858  | 0.3074              | 0.5079     | 0.05                | 0.2636  | 0.6644              | 0.16   | 0.0260              | 0.0804     |
| 2023 | Hepatoma-derived growth factor-like protein 1                  | Q5TGJ6  | 0.9394              | 0.9543     | 0.00                | 0.1113  | 0.6294              | -0.26  | 0.6117              | 0.6665     |
| 2024 | Hepatoma-derived growth factor-related protein 2               | Q7Z4V5  | 0.4053              | 0.6256     | -0.31               | 0.9810  | 0.9869              | 0.01   | 0.9991              | 0.9281     |
| 2025 | Hermansky-Pudlak syndrome 3 protein                            | Q969F9  | 0.2447              | 0.4303     | -0.22               | 0.1709  | 0.6602              | -0.12  | 0.0715              | 0.1595     |
| 2026 | Heterogeneous nuclear ribonucleoprotein A/B                    | Q99729  | 0.1036              | 0.2302     | -0.17               | 0.2217  | 0.6585              | -0.12  | 0.6859              | 0.7350     |
| 2027 | Heterogeneous nuclear ribonucleoprotein A1                     | Q13151  | 0.0555              | 0.1540     | -0.13               | 0.6477  | 0.7393              | 0.07   | 0.1010              | 0.2056     |
| 2028 | Heterogeneous nuclear ribonucleoprotein A1-like 2              | P09651  | 0.0190              | 0.0811     | 0.09                | 0.3195  | 0.6825              | 0.10   | 0.0010              | 0.0211     |
| 2029 | Heterogeneous nuclear ribonucleoprotein C-like 2               | Q32P51  | 0.6274              | 0.6902     | 0.09                | 0.2614  | 0.6638              | 0.23   | 0.1367              | 0.2603     |
| 2030 | Heterogeneous nuclear ribonucleoprotein C3                     | P51991  | 0.3215              | 0.5257     | -0.05               | 0.6587  | 0.7481              | 0.05   | 0.0522              | 0.1289     |
| 2031 | Heterogeneous nuclear ribonucleoprotein C-like 2               | B2RXH8  | 0.0046              | 0.0429     | -0.35               | 0.0898  | 0.6244              | -0.21  | 0.1412              | 0.6172     |
| 2032 | Heterogeneous nuclear ribonucleoprotein C-like 3               | B7WZ38  | 0.4108              | 0.5693     | -3.31               | 0.5752  | 0.7969              | -1.75  | 0.5661              | 0.7175     |
| 2033 | Heterogeneous nuclear ribonucleoprotein D                      | Q14103  | 0.2382              | 0.4226     | -0.05               | 0.9191  | 0.8104              | 0.04   | 0.0435              | 0.1134     |
| 2034 | Heterogeneous nuclear ribonucleoprotein D-like                 | O14979  | 0.6406              | 0.7024     | 0.04                | 0.5332  | 0.8496              | 0.07   | 0.1854              | 0.3306     |
| 2035 | Heterogeneous nuclear ribonucleoprotein F                      | P52597  | 0.0176              | 0.0776     | -0.15               | 0.4732  | 0.8018              | -0.06  | 0.0291              | 0.0866     |
| 2036 | Heterogeneous nuclear ribonucleoprotein H                      | P31943  | 0.0346              | 0.1164     | 0.09                | 0.7804  | 0.8417              | 0.03   | 0.0033              | 0.0306     |
| 2037 | Heterogeneous nuclear ribonucleoprotein H2                     | P55795  | 0.7693              | 0.8128     | 0.01                | 0.1601  | 0.6310              | -0.09  | 0.3151              | 0.5021     |
| 2038 | Heterogeneous nuclear ribonucleoprotein H3                     | P31942  | 0.0009              | 0.0220     | -0.16               | 0.1437  | 0.6547              | -0.16  | 0.0042              | 0.0323     |
| 2039 | Heterogeneous nuclear ribonucleoprotein K                      | P61978  | 0.0141              | 0.0694     | 0.14                | 0.3740  | 0.7215              | 0.15   | 0.0075              | 0.0409     |
| 2040 | Heterogeneous nuclear ribonucleoprotein L                      | P14866  | 0.7549              | 0.8007     | 0.02                | 0.9942  | 0.9963              | 0.00   | 0.0135              | 0.0543     |
| 2041 | Heterogeneous nuclear ribonucleoprotein L-like                 | Q8WVV9  | 0.3103              | 0.5112     | -0.08               | 0.8310  | 0.8783              | 0.02   | 0.1597              | 0.2941     |
| 2042 | Heterogeneous nuclear ribonucleoprotein M                      | P52772  | 0.0007              | 0.0207     | 0.25                | 0.1825  | 0.6657              | 0.25   | 0.0128              | 0.0532     |
| 2043 | Heterogeneous nuclear ribonucleoprotein Q                      | Q60506  | 0.0220              | 0.0883     | 0.04                | 0.3765  | 0.7242              | 0.05   | 0.0000              | 0.0000     |
| 2044 | Heterogeneous nuclear ribonucleoprotein R                      | Q43390  | 0.0596              | 0.1616     | 0.15                | 0.2407  | 0.6607              | 0.25   | 0.0129              | 0.0532     |
| 2045 | Heterogeneous nuclear ribonucleoprotein U                      | Q00839  | 0.0205              | 0.0847     | -0.09               | 0.1137  | 0.6340              | -0.08  | 0.0063              | 0.0386     |
| 2046 | Heterogeneous nuclear ribonucleoprotein U-like protein 1       | Q9BUJ2  | 0.2323              | 0.4141     | 0.07                | 0.2439  | 0.6580              | 0.17   | 0.0015              | 0.0226     |
| 2047 | Heterogeneous nuclear ribonucleoprotein U-like protein 2       | Q1KMD3  | 0.6693              | 0.7280     | -0.08               | 0.0185  | 0.4629              | -0.32  | 0.5203              | 0.7412     |
| 2048 | Heterogeneous nuclear ribonucleoproteins A2/B1                 | P22626  | 0.4679              | 0.5442     | -0.04               | 0.9352  | 0.9562              | -0.01  | 0.0038              | 0.0313     |
| 2049 | Heterogeneous nuclear ribonucleoproteins C1/C2                 | P07910  | 0.6157              | 0.6800     | -0.02               | 0.5907  | 0.6957              | -0.04  | 0.0829              | 0.1773     |
| 2050 | Hexokinase-1                                                   | P19367  | 0.0007              | 0.0206     | 0.36                | 0.3398  | 0.6990              | 0.13   | 0.0119              | 0.0510     |
| 2051 | Hexokinase-2                                                   | P52789  | 0.3973              | 0.6162     | 0.12                | 0.7078  | 0.7853              | -0.12  | 0.2801              | 0.4553     |
| 2052 | Hexokinase-3                                                   | P52790  | 0.0079              | 0.0525     | -0.31               | 0.0002  | 0.0357              | -0.61  | 0.0003              | 0.0099     |
| 2053 | HHIP-like protein 1                                            | Q96JK4  | 0.0003              | 0.0159     | -2.00               | 0.5556  | 0.8703              | -0.36  | 0.1631              | 0.2990     |
| 2054 | High affinity cAMP-specific 3', 5'-cyclic phosphodiesterase 7A | P13946  | 0.0247              | 0.0949     | -0.34               | 0.051   | 0.5643              | 0.10   | 0.1540              | 0.2855     |

Supplementary Table S2. Overview on all relatively quantified 5180 proteins statistical analysis

|                                                                                          |         |  | MCF-7               |            |                     |         | SSE                 |        |                     |            | MDA-MB-231          |         |                     |        | SSE                 |            |                     |         | SSE                 |        |        |        |       |        |        |       |        |        |       |
|------------------------------------------------------------------------------------------|---------|--|---------------------|------------|---------------------|---------|---------------------|--------|---------------------|------------|---------------------|---------|---------------------|--------|---------------------|------------|---------------------|---------|---------------------|--------|--------|--------|-------|--------|--------|-------|--------|--------|-------|
|                                                                                          |         |  | Dai SC20 vs control |            | Gen SC20 vs control |         | SSE SC20 vs control |        | Dai IC20 vs control |            | Gen IC20 vs control |         | SSE IC20 vs control |        | Dai IC20 vs control |            | Gen IC20 vs control |         | SSE IC20 vs control |        |        |        |       |        |        |       |        |        |       |
| Protein name                                                                             | UniProt |  | p value             | BH q value | log2FC              | p value | BH q value          | log2FC | p value             | BH q value | log2FC              | p value | BH q value          | log2FC | p value             | BH q value | log2FC              | p value | BH q value          | log2FC |        |        |       |        |        |       |        |        |       |
| 2055 High affinity cAMP-specific and IBMX-insensitive 3', 5'-cyclic phosphodiesterase 8A | P06058  |  | 0.1064              | 0.2347     | -0.57               | 0.8436  | 0.8876              | -0.04  | 0.3468              | 0.5409     | -0.27               | 0.5210  | 0.7261              | -0.14  | 0.7905              | 0.8357     | 0.05                | 0.7329  | 0.9719              | -0.10  | 0.3736 | 0.4431 | -2.55 | 0.8708 | 0.9278 | -0.33 | 0.0651 | 0.1167 | 2.06  |
| 2056 High mobility group nucleosome-binding domain-containing protein 5                  | P82970  |  | 0.0013              | 0.0251     | 0.46                | 0.0071  | 0.4132              | 0.85   | 0.0001              | 0.0324     | 0.96                | 0.0003  | 0.0123              | 0.67   | 0.0007              | 0.0218     | 1.19                | 0.0034  | 0.0589              | 0.50   | 0.0109 | 0.1025 | 0.40  | 0.0944 | 0.3068 | 0.17  | 0.2067 | 0.2755 | -0.12 |
| 2057 High mobility group protein B1                                                      | P09429  |  | 0.8800              | 0.9055     | 0.00                | 0.6305  | 0.7269              | 0.11   | 0.1064              | 0.2144     | 0.15                | 0.8883  | 0.9047              | 0.00   | 0.0003              | 0.0138     | -0.38               | 0.0675  | 0.1823              | -0.05  | 0.1969 | 0.4064 | 0.22  | 0.6861 | 1.1279 | 0.04  | 0.4615 | 0.5297 | -0.05 |
| 2058 High mobility group protein B2                                                      | P26583  |  | 0.0253              | 0.0961     | 0.16                | 0.2496  | 0.6600              | 0.28   | 0.0116              | 0.0504     | 0.31                | 0.0034  | 0.0235              | 0.29   | 0.0703              | 0.2021     | -0.11               | 0.0221  | 0.0953              | 0.18   | 0.0544 | 0.1853 | 0.47  | 0.0470 | 0.2019 | 0.19  | 0.1284 | 0.1879 | 0.11  |
| 2059 High mobility group protein B3                                                      | O15347  |  | 0.0633              | 0.1666     | 0.15                | 0.2859  | 0.6665              | 0.27   | 0.0117              | 0.0506     | 0.28                | 0.0537  | 0.1213              | 0.18   | 0.0587              | 0.1821     | -0.17               | 0.1478  | 0.3041              | 0.10   | 0.3984 | 0.4545 | 0.11  | 0.4650 | 0.8730 | -0.08 | 0.3355 | 0.1938 | -0.12 |
| 2060 High mobility group protein HMG/HMG-Y                                               | P17096  |  | 0.4108              | 0.5691     | -3.31               | 0.5752  | 0.7967              | -1.75  | 0.5661              | 0.7173     | -1.19               | 0.5388  | 0.6782              | 0.89   | 0.2938              | 0.4647     | -1.88               | 0.9510  | 1.0889              | 0.09   | 0.1134 | 0.2779 | 0.39  | 0.5104 | 0.9293 | -0.08 | 0.3210 | 0.3922 | -0.07 |
| 2061 Hippocalcin-like protein 1                                                          | P37235  |  | 0.0049              | 0.0433     | 0.40                | 0.2372  | 0.6620              | 0.05   | 0.0138              | 0.0551     | 0.08                | 0.0092  | 0.0386              | 0.12   | 0.8780              | 0.9069     | -0.01               | 0.4010  | 0.6158              | 0.40   | 0.3173 | 0.5798 | -0.37 | 0.1297 | 0.3766 | 0.44  | 0.0116 | 0.0936 | 0.51  |
| 2062 Hippocalcin-like protein 4                                                          | Q9UM19  |  | 0.5777              | 0.6451     | -0.33               | 0.8855  | 0.9183              | -0.11  | 0.0091              | 0.0446     | -3.16               | 0.7900  | 0.8194              | 0.29   | 0.3325              | 0.4296     | 0.47                | 0.6632  | 0.9014              | -0.20  | 0.3736 | 0.4470 | -2.55 | 0.8708 | 0.9353 | -0.33 | 0.0651 | 0.1183 | 2.06  |
| 2063 Histidine triad nucleotide-binding protein 1                                        | P49773  |  | 0.0092              | 0.0571     | 0.11                | 0.3367  | 0.6954              | 0.21   | 0.0158              | 0.0593     | 0.26                | 0.0025  | 0.0211              | 0.30   | 0.4334              | 0.5275     | 0.02                | 0.0069  | 0.0641              | 0.22   | 0.0551 | 0.1865 | 0.37  | 0.0339 | 0.1664 | 0.31  | 0.1146 | 0.1722 | 0.13  |
| 2064 Histidine triad nucleotide-binding protein 2 mitochondrial                          | Q9BX68  |  | 0.0442              | 0.1337     | -0.09               | 0.1037  | 0.6335              | -0.18  | 0.4638              | 0.6806     | -0.04               | 0.0299  | 0.0802              | -0.12  | 0.5810              | 0.6593     | -0.02               | 0.7042  | 0.9462              | 0.01   | 0.2626 | 0.5034 | 0.11  | 0.0142 | 0.0995 | 0.31  | 0.4610 | 0.5293 | -0.11 |
| 2065 Histidine-tRNA ligase cytoplasmic                                                   | P12081  |  | 0.0559              | 0.1546     | 0.14                | 0.2257  | 0.6609              | 0.16   | 0.0162              | 0.0602     | 0.24                | 0.0276  | 0.0756              | 0.22   | 0.3219              | 0.4190     | 0.06                | 0.0758  | 0.1957              | 0.13   | 0.0948 | 0.2478 | 0.24  | 0.7470 | 1.1880 | -0.02 | 0.0576 | 0.2137 | -0.15 |
| 2066 Histone acetyltransferase KAT8                                                      | Q9H726  |  | 0.3703              | 0.5848     | -0.05               | 0.3175  | 0.6810              | -0.08  | 0.0031              | 0.0300     | 0.32                | 0.5174  | 0.7226              | -0.04  | 0.0155              | 0.0886     | -0.21               | 0.3571  | 0.5633              | 0.07   | 0.0586 | 0.1922 | 0.23  | 0.2053 | 0.5057 | -0.09 | 0.1912 | 0.2590 | -0.07 |
| 2067 Histone acetyltransferase p300                                                      | O09472  |  | 0.4108              | 0.5690     | -3.31               | 0.5752  | 0.7965              | -1.75  | 0.5661              | 0.7171     | -1.19               | 0.5388  | 0.6781              | 0.89   | 0.2938              | 0.4646     | -1.88               | 0.9510  | 1.0887              | 0.09   | 0.0932 | 0.2451 | 0.33  | 0.6897 | 1.1320 | -0.03 | 0.0410 | 0.1758 | -0.16 |
| 2068 Histone acetyltransferase type B catalytic subunit                                  | O14929  |  | 0.0248              | 0.0951     | 0.59                | 0.8466  | 0.8895              | -0.09  | 0.2669              | 0.3600     | -0.25               | 0.0565  | 0.1259              | 0.86   | 0.4875              | 0.5775     | -0.13               | 0.0311  | 0.0767              | 0.82   | 0.1406 | 0.3214 | 0.08  | 0.0611 | 0.2364 | -0.10 | 0.7225 | 0.7709 | -0.02 |
| 2069 Histone chaperone ASF1A                                                             | Q9Y294  |  | 0.9426              | 0.9570     | -0.01               | 0.1983  | 0.6661              | -0.57  | 0.1839              | 0.3286     | -0.22               | 0.0410  | 0.1002              | -0.47  | 0.1188              | 0.2828     | -0.23               | 0.7408  | 0.9802              | -0.03  | 0.3736 | 0.4423 | -2.55 | 0.8708 | 0.9264 | -0.33 | 0.0651 | 0.1164 | 2.06  |
| 2070 Histone chaperone ASF1B                                                             | Q9N1P2  |  | 0.0245              | 0.0946     | -0.59               | 0.0536  | 0.5822              | -0.56  | 0.0000              | 0.0000     | -0.51               | 0.0152  | 0.0509              | -0.71  | 0.0017              | 0.0320     | -1.11               | 0.0426  | 0.1363              | -1.24  | 0.3736 | 0.5682 | -2.55 | 0.8708 | 1.1566 | -0.33 | 0.0651 | 0.1748 | 2.06  |
| 2071 Histone deacetylase 1                                                               | O13547  |  | 0.0008              | 0.0210     | -0.15               | 0.8397  | 0.8850              | -0.02  | 0.4207              | 0.6287     | -0.02               | 0.0412  | 0.1005              | -0.09  | 0.0008              | 0.0024     | -0.19               | 0.3065  | 0.5050              | 0.03   | 0.0719 | 0.1038 | 0.68  | 0.0039 | 0.0505 | 0.42  | 0.0047 | 0.0673 | 0.39  |
| 2072 Histone deacetylase 11                                                              | Q96DB2  |  | 0.0152              | 0.0716     | -0.09               | 0.4594  | 0.7914              | -0.07  | 0.5004              | 0.7230     | 0.05                | 0.5473  | 0.5981              | -0.02  | 0.1478              | 0.3239     | 0.09                | 0.4301  | 0.6511              | -0.12  | 0.3736 | 0.4664 | -2.55 | 0.8708 | 0.9715 | -0.33 | 0.0651 | 0.1263 | 2.06  |
| 2073 Histone deacetylase 2                                                               | Q92769  |  | 0.1571              | 0.3108     | -0.09               | 0.4041  | 0.5645              | -0.17  | 0.8872              | 0.9106     | -0.01               | 0.0118  | 0.0435              | -0.26  | 0.0031              | 0.0416     | -0.35               | 0.1072  | 0.2453              | -0.16  | 0.2586 | 0.4974 | 0.12  | 0.1532 | 0.4230 | -0.09 | 0.9750 | 0.9797 | 0.00  |
| 2074 Histone deacetylase 7                                                               | Q8WU4   |  | 0.0374              | 0.1215     | -0.56               | 0.0024  | 0.2391              | -0.74  | 0.0083              | 0.0431     | -0.65               | 0.0040  | 0.0257              | -2.05  | 0.0913              | 0.2387     | -0.30               | 0.0775  | 0.1986              | 0.40   | 0.3736 | 0.5450 | -2.55 | 0.8708 | 1.1151 | -0.33 | 0.0651 | 0.1626 | 2.06  |
| 2075 Histone H1.0                                                                        | P07305  |  | 0.0313              | 0.5004     | 0.21                | 0.3092  | 0.6784              | -0.39  | 0.0085              | 0.0435     | -0.48               | 0.1006  | 0.1950              | 0.19   | 0.2314              | 0.4417     | -0.15               | 0.9540  | 0.9620              | 0.01   | 0.0013 | 0.0468 | 1.08  | 0.5176 | 0.9391 | 0.14  | 0.4755 | 0.5442 | 0.41  |
| 2076 Histone H1.2                                                                        | P16403  |  | 0.0233              | 0.0914     | -0.46               | 0.0980  | 0.6346              | -0.22  | 0.0193              | 0.0668     | -0.39               | 0.0055  | 0.0297              | -0.66  | 0.0032              | 0.0425     | -0.48               | 0.0674  | 0.1821              | -0.91  | 0.0278 | 0.1444 | 0.60  | 0.9203 | 0.9416 | -0.01 | 0.0173 | 0.1120 | 0.37  |
| 2077 Histone H1.4                                                                        | P10412  |  | 0.3216              | 0.5257     | -0.07               | 0.0511  | 0.8122              | 0.07   | 0.0511              | 0.1270     | 0.19                | 0.7371  | 0.7732              | 0.02   | 0.0030              | 0.0405     | -0.58               | 0.2867  | 0.4830              | -0.07  | 0.3736 | 0.4841 | -2.55 | 0.8708 | 1.0042 | -0.33 | 0.0651 | 0.1338 | 2.06  |
| 2078 Histone H1.5                                                                        | P16401  |  | 0.1052              | 0.2327     | 0.15                | 0.4963  | 0.8185              | 0.14   | 0.0212              | 0.0704     | 0.31                | 0.0270  | 0.0744              | 0.25   | 0.0348              | 0.1354     | -0.25               | 0.1743  | 0.3421              | 0.11   | 0.0514 | 0.1795 | 0.51  | 0.8367 | 1.2804 | 0.02  | 0.0025 | 0.0535 | 0.49  |
| 2079 Histone H1t                                                                         | P22492  |  | 0.3812              | 0.5969     | -0.07               | 0.8188  | 0.8704              | 0.03   | 0.7219              | 0.7668     | 0.03                | 0.8114  | 0.8374              | 0.02   | 0.1509              | 0.3286     | -0.12               | 0.9185  | 1.1557              | -0.01  | 0.3736 | 0.4332 | -2.55 | 0.8708 | 0.9092 | -0.33 | 0.0651 | 0.1128 | 2.06  |
| 2080 Histone H1x                                                                         | Q92522  |  | 0.0060              | 0.0467     | -0.14               | 0.0934  | 0.6291              | -0.17  | 0.0348              | 0.0970     | -0.11               | 0.0003  | 0.0105              | -0.29  | 0.0000              | 0.0000     | -0.67               | 0.0695  | 0.1853              | -0.27  | 0.1599 | 0.3529 | 0.11  | 0.1798 | 0.4673 | 0.07  | 0.0994 | 0.2679 | 0.06  |
| 2081 Histone H2A type 1                                                                  | PC0C58  |  | 0.6261              | 0.6895     | -0.03               | 0.3850  | 0.7302              | -0.14  | 0.6485              | 0.7009     | -0.03               | 0.0416  | 0.1012              | 0.17   | 0.0035              | 0.0438     | -0.56               | 0.0632  | 0.1753              | 0.16   | 0.0048 | 0.0736 | 0.66  | 0.0130 | 0.0951 | 0.49  | 0.0002 | 0.0235 | 1.89  |
| 2082 Histone H2A.Z                                                                       | PC0C55  |  | 0.4108              | 0.5688     | -3.31               | 0.5752  | 0.7962              | -1.75  | 0.5661              | 0.7170     | -1.19               | 0.5388  | 0.6779              | 0.89   | 0.2938              | 0.4644     | -1.88               | 0.9510  | 1.0884              | 0.09   | 0.2770 | 0.5237 | -0.14 | 0.2374 | 0.5534 | -0.14 | 0.3778 | 0.4491 | 0.06  |
| 2083 Histone H2B type 1-K                                                                | O60814  |  | 0.3657              | 0.5791     | -0.14               | 0.2091  | 0.6613              | -0.51  | 0.1196              | 0.2360     | -0.27               | 0.1159  | 0.2172              | 0.29   | 0.3857              | 0.4832     | -0.12               | 0.2574  | 0.4482              | 0.17   | 0.3736 | 0.4887 | -2.55 | 0.8708 | 1.0127 | -0.33 | 0.0651 | 0.1358 | 2.06  |
| 2084 Histone H2B type 1-L                                                                | Q9N880  |  | 0.4108              | 0.5687     | -3.31               | 0.5752  | 0.7960              | -1.75  | 0.5661              | 0.7168     | -1.19               | 0.5388  | 0.6778              | 0.89   | 0.2938              | 0.4643     | -1.88               | 0.9510  | 1.0882              | 0.09   | 0.0217 | 0.1343 | 0.56  | 0.2534 | 0.5775 | 0.15  | 0.0005 | 0.0282 | 1.48  |
| 2085 Histone H3.1                                                                        | P68431  |  | 0.1751              | 0.3369     | 0.08                | 0.4473  | 0.7822              | 0.12   | 0.9397              | 0.9529     | -0.01               | 0.0273  | 0.0749              | 0.20   | 0.0357              | 0.1370     | -0.19               | 0.6652  | 0.9037              | -0.02  | 0.0207 | 0.1324 | 0.53  | 0.8993 | 0.9246 | 0.02  | 0.0040 | 0.0615 | 1.28  |
| 2086 Histone H4                                                                          | PC2805  |  | 0.9822              | 0.9877     | 0.00                | 0.6348  | 0.7312              | 0.09   | 0.5982              | 0.6543     | -                   |         |                     |        |                     |            |                     |         |                     |        |        |        |       |        |        |       |        |        |       |

Supplementary Table S2. Overview on all relatively quantified 5180 proteins statistical analysis

|      | Protein name                                                        | UniProt     | MCF-7               |            |                     |         | MDA-MB-231          |        |                     |            |
|------|---------------------------------------------------------------------|-------------|---------------------|------------|---------------------|---------|---------------------|--------|---------------------|------------|
|      |                                                                     |             | Dai SC20 vs control |            | Gen SC20 vs control |         | SSE SC20 vs control |        | Dai IC20 vs control |            |
|      |                                                                     |             | p value             | BH q value | log2FC              | p value | BH q value          | log2FC | p value             | BH q value |
|      |                                                                     |             |                     |            |                     |         |                     |        |                     |            |
| 2122 | HLA class II histocompatibility antigen, DRB1-10 beta chain         | Q30167      | 0.4108              | 0.5665     | -3.31               | 0.5752  | 0.7931              | -1.75  | 0.5661              | 0.7143     |
| 2123 | Holliday junction recognition protein                               | Q8NCD3      | 0.4108              | 0.5664     | -3.31               | 0.5752  | 0.7929              | -1.75  | 0.5661              | 0.7142     |
| 2124 | Q9H161                                                              | 0.0590      | 0.1442              | 0.15       | 0.4192              | 0.7574  | -0.34               | 0.0008 | 0.0205              | -0.19      |
| 2125 | Homeobox protein cut-like 1                                         | P39890      | 0.6927              | 0.7475     | -0.03               | 0.7772  | 0.8392              | 0.03   | 0.0304              | 0.0887     |
| 2126 | Homeobox protein cut-like 2                                         | O14529      | 0.1264              | 0.2653     | 0.21                | 0.1431  | 0.6542              | 0.18   | 0.2012              | 0.3531     |
| 2127 | Homeobox protein engrailed-2                                        | P19622      | 0.0626              | 0.1656     | 0.12                | 0.0762  | 0.6177              | 0.21   | 0.6358              | 0.6890     |
| 2128 | Homeobox protein Hox-A13                                            | P13271      | 0.0384              | 0.1231     | -1.40               | 0.3611  | 0.7099              | -1.91  | 0.1763              | 0.3188     |
| 2129 | Homeobox protein Hox-B5                                             | P09067      | 0.2585              | 0.4474     | 0.10                | 0.4597  | 0.7911              | -0.06  | 0.7102              | 0.7559     |
| 2130 | Homeobox protein Hox-C11                                            | O43248      | 0.7623              | 0.8067     | -0.07               | 0.7815  | 0.8427              | 0.07   | 0.9668              | 0.9728     |
| 2131 | Homeobox protein Hox-C5                                             | Q00444      | 0.0033              | 0.0377     | -0.22               | 0.4737  | 0.8016              | 0.10   | 0.5907              | 0.6469     |
| 2132 | Homeobox protein Hox-C6                                             | P09630      | 0.0115              | 0.0617     | -0.34               | 0.7584  | 0.8250              | 0.06   | 0.0078              | 0.0415     |
| 2133 | Homeobox protein Nkx-2.8                                            | O15522      | 0.9188              | 0.9380     | 0.00                | 0.0187  | 0.4657              | 0.17   | 0.8284              | 0.8615     |
| 2134 | Homeobox protein Nkx-6.1                                            | P78426      | 0.2664              | 0.4580     | 0.51                | 0.1657  | 0.6618              | 0.42   | 0.0826              | 0.1770     |
| 2135 | Homeobox protein SIX1                                               | Q15475      | 0.0182              | 0.0791     | 1.37                | 0.1775  | 0.6629              | 0.69   | 0.0557              | 0.1348     |
| 2136 | Host cell factor 1                                                  | P51610      | 0.4108              | 0.5662     | -3.31               | 0.5752  | 0.7926              | -1.75  | 0.5661              | 0.7140     |
| 2137 | Hsc70-interacting protein                                           | P50502      | 0.0061              | 0.0469     | 0.19                | 0.1413  | 0.6529              | 0.24   | 0.0010              | 0.0216     |
| 2138 | Hsp70-binding protein 1                                             | Q9NZL4      | 0.0102              | 0.0590     | 0.50                | 0.6712  | 0.7586              | 0.07   | 0.2267              | 0.3857     |
| 2139 | Hsp90 co-chaperone Cdc37                                            | P16543      | 0.5372              | 0.6078     | 0.02                | 0.6436  | 0.5703              | 0.12   | 0.0029              | 0.0297     |
| 2140 | Huntingtin-associated protein 1                                     | P54257      | 0.4108              | 0.5661     | -3.31               | 0.5752  | 0.7924              | -1.75  | 0.5661              | 0.7138     |
| 2141 | Huntingtin-interacting protein 1-related protein                    | O75146      | 0.3876              | 0.6046     | 0.03                | 0.5177  | 0.8396              | -0.04  | 0.0097              | 0.0457     |
| 2142 | Hydroxyacyl-coenzyme A dehydrogenase, mitochondrial                 | Q16836      | 0.1775              | 0.3398     | -0.08               | 0.5556  | 0.8700              | -0.05  | 0.9024              | 0.9227     |
| 2143 | Hydroxyacylglutathione hydrolase, mitochondrial                     | Q16775      | 0.7839              | 0.8247     | 0.05                | 0.2615  | 0.6637              | 0.22   | 0.1331              | 0.2554     |
| 2144 | Hydroxymethylglutaryl-CoA lyase, mitochondrial                      | P35914      | 0.3179              | 0.5206     | -0.18               | 0.2072  | 0.8611              | 0.04   | 0.5150              | 0.7355     |
| 2145 | Hydroxymethylglutaryl-CoA synthase cytoplasmic                      | Q01581      | 0.0258              | 0.0972     | 0.08                | 0.2574  | 0.6627              | 0.18   | 0.0072              | 0.0401     |
| 2146 | Hydroxyproline dehydrogenase                                        | Q9UF12      | 0.8490              | 0.8796     | 0.02                | 0.9775  | 0.9853              | 0.00   | 0.0046              | 0.0331     |
| 2147 | Hydroxystyroid dehydrogenase-like protein 2                         | Q6YN16      | 0.0495              | 0.1431     | 0.08                | 0.3667  | 0.7152              | 0.07   | 0.0535              | 0.1310     |
| 2148 | Hypoxanthine-guanine phosphoribosyltransferase                      | P00492      | 0.0000              | 0.0000     | 0.46                | 0.1025  | 0.6336              | 0.20   | 0.0001              | 0.0185     |
| 2149 | Hypoxia up-regulated protein 1                                      | Q9Y4L1      | 0.0006              | 0.0199     | 0.33                | 0.1191  | 0.6684              | 0.26   | 0.0002              | 0.0179     |
| 2150 | Hypoxia-inducible factor 1-alpha inhibitor                          | Q9NWT6      | 0.0292              | 0.1045     | 1.24                | 0.0396  | 0.5635              | 1.28   | 0.0533              | 0.1307     |
| 2151 | Iduronate 2-sulfatase                                               | P22304      | 0.3858              | 0.6023     | 0.03                | 0.2830  | 0.6639              | 0.10   | 0.0066              | 0.0393     |
| 2152 | Immunity-related GTPase family O protein                            | Q8WZ49      | 0.4108              | 0.5659     | -3.31               | 0.5752  | 0.7922              | -1.75  | 0.5661              | 0.7137     |
| 2153 | Immunoglobulin heavy variable alpha 1                               | P01876      | 0.3191              | 0.5221     | 0.34                | 0.8213  | 0.8725              | -0.07  | 0.2246              | 0.3825     |
| 2154 | Immunoglobulin heavy variable 1-6D9                                 | AA0A0B4J2H0 | 0.0680              | 0.1733     | 2.26                | 0.0549  | 0.5851              | 2.18   | 0.1387              | 0.2629     |
| 2155 | Immunoglobulin heavy variable 3-43                                  | AA0A0B4J1X8 | 0.1166              | 0.2507     | -2.70               | 0.0476  | 0.5694              | -10.93 | 0.1216              | 0.2390     |
| 2156 | Immunoglobulin superfamily member 3                                 | O70054      | 0.0041              | 0.0403     | -0.24               | 0.0207  | 0.4745              | 0.20   | 0.0659              | 0.1504     |
| 2157 | Importin subunit alpha-1                                            | P22292      | 0.0250              | 0.0954     | -0.15               | 0.0965  | 0.6206              | -0.22  | 0.5605              | 0.1424     |
| 2158 | Importin subunit alpha-3                                            | Q00629      | 0.1032              | 0.2298     | 0.17                | 0.2485  | 0.6584              | -1.09  | 0.1255              | 0.2494     |
| 2159 | Importin subunit alpha-5                                            | P52294      | 0.6265              | 0.6896     | 0.04                | 0.5123  | 0.8348              | 0.06   | 0.1228              | 0.2410     |
| 2160 | Importin subunit alpha-6                                            | O15131      | 0.0847              | 0.2010     | -0.10               | 0.2124  | 0.6624              | 0.10   | 0.0567              | 0.1363     |
| 2161 | Importin subunit alpha-7                                            | O60684      | 0.9061              | 0.9269     | 0.01                | 0.1484  | 0.6587              | 0.21   | 0.0176              | 0.0633     |
| 2162 | Importin subunit beta-1                                             | Q14974      | 0.0587              | 0.1600     | 0.17                | 0.1288  | 0.6654              | 0.27   | 0.0068              | 0.0397     |
| 2163 | Importin-4                                                          | Q8TEX9      | 0.0002              | 0.0148     | 0.38                | 0.5942  | 0.6986              | 0.06   | 0.3774              | 0.5767     |
| 2164 | Importin-5                                                          | O00410      | 0.2810              | 0.4744     | -0.05               | 0.3728  | 0.7206              | 0.04   | 0.0740              | 0.1628     |
| 2165 | Importin-7                                                          | Q95373      | 0.3559              | 0.5666     | 0.04                | 0.0249  | 0.4831              | 0.16   | 0.0082              | 0.0428     |
| 2166 | Importin-9                                                          | Q96P70      | 0.0146              | 0.0701     | -0.14               | 0.0480  | 0.8055              | -0.03  | 0.0009              | 0.0204     |
| 2167 | Inactive C-alpha-formylglycine-generating enzyme 2                  | Q8NB37      | 0.0030              | 0.0367     | 0.44                | 0.1167  | 0.6363              | 0.27   | 0.0154              | 0.0584     |
| 2168 | Inactive peptidyl-prolyl cis-trans isomerase FKBP6                  | O75344      | 0.5233              | 0.5947     | -0.07               | 0.8665  | 0.8968              | 0.05   | 0.1245              | 0.2433     |
| 2169 | Inactive polypeptide N-acetylglucosaminyltransferase-like protein 5 | Q7Z4T8      | 0.2934              | 0.4914     | -0.46               | 0.1815  | 0.6644              | -0.79  | 0.1141              | 0.2268     |
| 2170 | Inactive rhomboid protein 2                                         | Q6PIF5      | 0.4108              | 0.5658     | -3.31               | 0.5752  | 0.7920              | -1.75  | 0.5661              | 0.7135     |
| 2171 | Inactive tyrosine-protein kinase 7                                  | Q13308      | 0.4108              | 0.5656     | -3.31               | 0.5752  | 0.7918              | -1.75  | 0.5661              | 0.7133     |
| 2172 | Inactive tyrosine-protein kinase PEA3                               | Q0H792      | 0.4108              | 0.5655     | -3.31               | 0.5752  | 0.7916              | -1.75  | 0.5661              | 0.7131     |
| 2173 | Inactive ubiquitin thioesterase OTULINL                             | Q9NUU6      | 0.0016              | 0.0274     | 0.38                | 0.0017  | 0.2148              | 0.38   | 0.0031              | 0.0306     |
| 2174 | Influenza virus NS1A-binding protein                                | Q9Y6Y0      | 0.0026              | 0.0341     | 0.37                | 0.0298  | 0.5078              | 0.34   | 0.0227              | 0.0741     |
| 2175 | Inhibitor of Bruton tyrosine kinase                                 | Q9P2D0      | 0.1076              | 0.2361     | -0.13               | 0.4445  | 0.7802              | -0.05  | 0.6635              | 0.7148     |
| 2176 | Inhibitor of nuclear factor kappa-B kinase subunit beta             | O14920      | 0.8067              | 0.8442     | 0.01                | 0.3657  | 0.7140              | 0.77   | 0.0073              | 0.0404     |
| 2177 | Inhibitor of nuclear factor kappa-B kinase subunit epsilon          | Q14164      | 0.7843              | 0.8247     | 0.01                | 0.8099  | 0.8634              | 0.02   | 0.7073              | 0.7536     |
| 2178 | Inhibitor of nuclear factor kappa-B kinase-interacting protein      | Q70UQ0      | 0.4108              | 0.5653     | -3.31               | 0.5752  | 0.7914              | -1.75  | 0.5661              | 0.7130     |
| 2179 | Inner nuclear membrane protein Man1                                 | Q9Y2U8      | 0.4385              | 0.5159     | 0.06                | 0.5808  | 0.6886              | 0.05   | 0.0162              | 0.0601     |
| 2180 | Inorganic pyrophosphatase                                           | Q15181      | 0.0010              | 0.0222     | 0.21                | 0.1307  | 0.6466              | 0.19   | 0.0898              | 0.1879     |
| 2181 | Inorganic pyrophosphatase 2, mitochondrial                          | Q9H2U2      | 0.2477              | 0.4338     | 0.04                | 0.6441  | 0.7373              | 0.07   | 0.0019              | 0.0239     |
| 2182 | Inosine triphosphatase pyrophosphatase                              | Q9BY32      | 0.4108              | 0.5652     | -3.31               | 0.5752  | 0.7912              | -1.75  | 0.5661              | 0.7128     |
| 2183 | Inosine-3-monophosphate dehydrogenase 1                             | P20839      | 0.0815              | 0.1967     | -0.91               | 0.4942  | 0.8171              | -0.25  | 0.1851              | 0.3202     |
| 2184 | Inosine-5-monophosphate dehydrogenase 2                             | P12268      | 0.0169              | 0.0761     | 0.15                | 0.3841  | 0.7301              | 0.17   | 0.0009              | 0.0205     |
| 2185 | Inositol 1, 4, 5-trisphosphate receptor type 1                      | Q14643      | 0.6686              | 0.7276     | 0.10                | 0.1291  | 0.6430              | 0.48   | 0.8424              | 0.8733     |
| 2186 | Inositol 1, 4, 5-trisphosphate receptor type 2                      | Q14571      | 0.4108              | 0.5650     | -3.31               | 0.5752  | 0.7910              | -1.75  | 0.5661              | 0.7126     |
| 2187 | Inositol monophosphatase 1                                          | P29218      | 0.4108              | 0.5649     | -3.31               | 0.5752  | 0.7907              | -1.75  | 0.5661              | 0.7124     |
| 2188 | Inositol monophosphatase 3                                          | Q9NX62      | 0.7410              | 0.7901     | -0.04               | 0.2181  | 0.6603              | -0.12  | 0.0806              | 0.1737     |
| 2189 | Inositol polyphosphate 1-phosphatase                                | P49441      | 0.3107              | 0.5117     | -0.08               | 0.7005  | 0.7788              | -0.08  | 0.0068              | 0.0394     |
| 2190 | Inositol polyphosphate 5-phosphatase OCRL-1                         | Q01968      | 0.8392              | 0.8713     | 0.01                | 0.5617  | 0.8756              | 0.07   | 0.2272              | 0.3862     |
| 2191 | Inositol-3-phosphate synthase 1                                     | Q9NPH2      | 0.6136              | 0.6781     | -0.03               | 0.9208  | 0.9456              | -0.01  | 0.0871              | 0.1845     |
| 2192 | Inositol-tetrakisphosphate 1-kinase                                 | Q13572      | 0.0477              | 0.1402     | 0.53                | 0.7870  | 0.8467              | -0.11  | 0.1949              | 0.3436     |
| 2193 | Insulin                                                             | P01308      | 0.4108              | 0.5647     | -3.31               | 0.5752  | 0.7905              | -1.75  | 0.5661              | 0.7123     |
| 2194 | Insulin receptor substrate 1                                        | P35568      | 0.0145              | 0.0700     | 0.44                | 0.1930  | 0.6683              | 0.18   | 0.0787              | 0.1726     |
| 2195 | Insulin-degrading enzyme                                            | P14735      | 0.2196              | 0.3958     | 0.07                | 0.5252  | 0.8438              | 0.08   | 0.0486              | 0.1226     |
| 2196 | Insulin-like growth factor 1 receptor                               | R08069      | 0.0015              | 0.0266     | -0.31               | 0.1488  | 0.6599              | -0.29  | 0.8336              | 0.8659     |
| 2197 | Insulin-like growth factor 2 mRNA-binding protein 1                 | Q9NZT8      | 0.4108              | 0.5646     | -3.31               | 0.5752  | 0.7903              | -1.75  | 0.5661              | 0.7121     |
| 2198 | Insulin-like growth factor 2 mRNA-binding protein 2                 | Q9YGM1      | 0.4108              | 0.5644     | -3.31               | 0.5752  | 0.7901              | -1.75  | 0.5661              | 0.7119     |
| 2199 | Insulin-like growth factor 2 mRNA-binding protein 3                 | O00425      | 0.1900              | 0.3559     | 0.19                | 0.1009  | 0.6328              | 0.08   | 0.1866              | 0.3318     |

Supplementary Table S2. Overview on all relatively quantified 5180 proteins statistical analysis

|      | Protein name                                                                  | UniProt | MCF-7               |                     |                     |                     | MDA-MB-231          |                     |                     |                     |
|------|-------------------------------------------------------------------------------|---------|---------------------|---------------------|---------------------|---------------------|---------------------|---------------------|---------------------|---------------------|
|      |                                                                               |         | Dai SC20 vs control | Gen SC20 vs control | SSE SC20 vs control | Dai IC20 vs control | Gen IC20 vs control | SSE IC20 vs control | Dai IC20 vs control | Gen IC20 vs control |
|      |                                                                               |         | p value             | BH q value          | log2FC              | p value             | BH q value          | log2FC              | p value             | BH q value          |
| 2200 | Insulin-like growth factor-binding protein 7                                  | Q16270  | 0.4108              | 0.5643              | -3.31               | 0.5752              | 0.7899              | -1.75               | 0.5661              | 0.7117              |
| 2201 | Integrator complex subunit 1                                                  | Q8N201  | 0.0014              | 0.0255              | 0.19                | 0.5752              | 0.5858              | 0.47                | 0.0029              | 0.0296              |
| 2202 | Integrator complex subunit 13                                                 | Q9NVM9  | 0.1335              | 0.2767              | -0.10               | 0.2443              | 0.6567              | 0.11                | 0.0487              | 0.1228              |
| 2203 | Integrator complex subunit 3                                                  | Q68E01  | 0.8839              | 0.9086              | 0.01                | 0.5718              | 0.8849              | 0.03                | 0.0011              | 0.0214              |
| 2204 | Integrator complex subunit 5                                                  | Q6P9B9  | 0.4108              | 0.5641              | -3.31               | 0.5752              | 0.7897              | -1.75               | 0.5661              | 0.7116              |
| 2205 | Integrin alpha-2                                                              | P17301  | 0.0070              | 0.0495              | 0.33                | 0.1005              | 0.6341              | 0.22                | 0.0004              | 0.0214              |
| 2206 | Integrin alpha-3                                                              | P26006  | 0.7083              | 0.7063              | -0.02               | 0.2998              | 0.6732              | 0.10                | 0.0270              | 0.0823              |
| 2207 | Integrin alpha-E                                                              | P38570  | 0.0094              | 0.0574              | -0.66               | 0.2432              | 0.6599              | -0.44               | 0.0039              | 0.0317              |
| 2208 | Integrin alpha-V                                                              | P06756  | 0.4108              | 0.5640              | -3.31               | 0.5752              | 0.7895              | -1.75               | 0.5661              | 0.7114              |
| 2209 | Integrin alpha-X                                                              | P20702  | 0.4108              | 0.5638              | -3.31               | 0.5752              | 0.7893              | -1.75               | 0.5661              | 0.7112              |
| 2210 | Integrin beta-1                                                               | P05556  | 0.5920              | 0.6586              | -0.03               | 0.5065              | 0.8282              | 0.17                | 0.0616              | 0.1442              |
| 2211 | Integrin beta-5                                                               | P18084  | 0.9351              | 0.9509              | 0.00                | 0.2884              | 0.6687              | -0.07               | 0.2143              | 0.3689              |
| 2212 | Integrin beta-like protein 1                                                  | O95965  | 0.1588              | 0.3134              | 0.04                | 0.3569              | 0.7083              | 0.18                | 0.0221              | 0.0725              |
| 2213 | Integrin-linked kinase-associated serine/threonine phosphatase 2C             | Q9H0C8  | 0.4108              | 0.5637              | -3.31               | 0.5752              | 0.7891              | -1.75               | 0.5661              | 0.7111              |
| 2214 | Integrin-linked protein kinase                                                | Q13418  | 0.0020              | 0.0310              | 0.48                | 0.0647              | 0.5890              | 0.77                | 0.0004              | 0.0225              |
| 2215 | Integrin alpha-5                                                              | P01569  | 0.4108              | 0.5635              | -3.31               | 0.5752              | 0.7889              | -1.75               | 0.5661              | 0.7109              |
| 2216 | Interferon regulatory factor 2-binding protein 2                              | Q7Z519  | 0.2895              | 0.4864              | 0.09                | 0.2184              | 0.6608              | 0.16                | 0.0742              | 0.1630              |
| 2217 | Interferon regulatory factor 2-binding protein-like                           | Q9H1B7  | 0.3174              | 0.5200              | -0.21               | 0.8510              | 0.8952              | 0.04                | 0.7964              | 0.8336              |
| 2218 | Interferon regulatory factor 4                                                | Q15306  | 0.0768              | 0.1893              | 0.28                | 0.9594              | 0.9724              | -0.01               | 0.4913              | 0.7119              |
| 2219 | Interferon-induced helicase C domain-containing protein 1                     | Q9BYX4  | 0.0517              | 0.1472              | 0.16                | 0.0662              | 0.6597              | 0.21                | 0.0201              | 0.0683              |
| 2220 | Interferon-induced protein with tetratricopeptide repeats 3                   | O14879  | 0.6264              | 0.6896              | 0.05                | 0.6625              | 0.7514              | 0.07                | 0.1195              | 0.2359              |
| 2221 | Interferon-induced protein with tetratricopeptide repeats 5                   | Q13325  | 0.4108              | 0.5634              | -3.31               | 0.5752              | 0.7887              | -1.75               | 0.5661              | 0.7107              |
| 2222 | Interferon-induced transmembrane protein 3                                    | Q01628  | 0.5905              | 0.6571              | -0.30               | 0.5320              | 0.8500              | -0.38               | 0.4418              | 0.6535              |
| 2223 | Interferon-induced double-stranded RNA-activated protein kinase               | P19525  | 0.0024              | 0.0335              | 0.09                | 0.0990              | 0.6363              | -0.06               | 0.0473              | 0.1206              |
| 2224 | Interferon-inducible double-stranded RNA-dependent protein kinase activator A | O75569  | 0.0003              | 0.0157              | 0.85                | 0.0102              | 0.4440              | 0.30                | 0.5231              | 0.7442              |
| 2225 | Interferon-stimulated gene 20 kDa protein                                     | Q96AZ6  | 0.0106              | 0.0594              | 0.50                | 0.8448              | 0.8882              | -0.02               | 0.3456              | 0.5394              |
| 2226 | Interleukin enhancer-binding factor 2                                         | Q12905  | 0.0011              | 0.0229              | 0.27                | 0.0809              | 0.6154              | 0.21                | 0.0007              | 0.0211              |
| 2227 | Interleukin enhancer-binding factor 3                                         | Q12906  | 0.1663              | 0.3242              | 0.08                | 0.3771              | 0.7245              | 0.16                | 0.0262              | 0.0807              |
| 2228 | Interleukin-1 receptor accessory protein-like 1                               | Q9NZN1  | 0.5632              | 0.6313              | -0.28               | 0.3962              | 0.7398              | -0.24               | 0.5067              | 0.7283              |
| 2229 | Interleukin-1 receptor accessory protein-like 3                               | Q9Y616  | 0.2505              | 0.4366              | -0.03               | 0.2980              | 0.6723              | 0.17                | 0.0489              | 0.1231              |
| 2230 | Interleukin-1 receptor-like 2                                                 | Q9HB29  | 0.4108              | 0.5632              | -3.31               | 0.5752              | 0.7884              | -1.75               | 0.5661              | 0.7105              |
| 2231 | Interleukin-12 receptor subunit beta-1                                        | P42701  | 0.4108              | 0.5631              | -3.31               | 0.5752              | 0.7882              | -1.75               | 0.5661              | 0.7104              |
| 2232 | Interleukin-13 receptor subunit alpha-1                                       | P78552  | 0.4108              | 0.5629              | -3.31               | 0.5752              | 0.7880              | -1.75               | 0.5661              | 0.7104              |
| 2233 | Interleukin-17 receptor B                                                     | Q9NRM6  | 0.4268              | 0.5043              | -0.12               | 0.0882              | 0.6191              | 0.27                | 0.8993              | 0.9201              |
| 2234 | Interleukin-17B                                                               | Q9UIH5  | 0.4108              | 0.5628              | -3.31               | 0.5752              | 0.7878              | -1.75               | 0.5661              | 0.7102              |
| 2235 | Interleukin-6 receptor subunit beta                                           | P40189  | 0.4108              | 0.5627              | -3.31               | 0.5752              | 0.7876              | -1.75               | 0.5661              | 0.7100              |
| 2236 | Intermediate filament family orphan 1                                         | Q0D215  | 0.4108              | 0.5625              | -3.31               | 0.5752              | 0.7874              | -1.75               | 0.5661              | 0.7099              |
| 2237 | Intersectin-1                                                                 | Q15811  | 0.0819              | 0.1971              | 0.11                | 0.1731              | 0.6603              | 0.22                | 0.0465              | 0.1193              |
| 2238 | Intracellular hyaluronan-binding protein 4                                    | Q5JVS0  | 0.2714              | 0.4641              | 0.38                | 0.4784              | 0.8041              | 0.25                | 0.0785              | 0.1699              |
| 2239 | Intracellular transport protein 122 homolog                                   | Q9HBB6  | 0.0005              | 0.0186              | 0.15                | 0.4465              | 0.7822              | 0.04                | 0.4320              | 0.6423              |
| 2240 | Intracellular transport protein 172 homolog                                   | Q9UG01  | 0.0140              | 0.0693              | -2.82               | 0.4086              | 0.7498              | -1.02               | 0.0149              | 0.0575              |
| 2241 | Intracellular transport protein 74 homolog                                    | Q96LB3  | 0.1164              | 0.2504              | -0.08               | 0.2728              | 0.6653              | -0.14               | 0.0031              | 0.0300              |
| 2242 | Inverted formin-2                                                             | Q27181  | 0.0026              | 0.0340              | -0.15               | 0.1414              | 0.6528              | 0.27                | 0.0032              | 0.0305              |
| 2243 | Ispirin                                                                       | Q8N2Y8  | 0.7655              | 0.8091              | 0.02                | 0.6506              | 0.7423              | 0.02                | 0.0139              | 0.0553              |
| 2244 | IQ domain-containing protein E                                                | Q6IPM2  | 0.4108              | 0.5624              | -3.31               | 0.5752              | 0.7872              | -1.75               | 0.5661              | 0.7097              |
| 2245 | IQ motif and SEC7 domain-containing protein 1                                 | Q6DN90  | 0.3583              | 0.5698              | 0.06                | 0.0158              | 0.4547              | 0.29                | 0.8991              | 0.9201              |
| 2246 | Iron-sulfur cluster assembly enzyme ISC1, mitochondrial                       | Q9H1K1  | 0.9901              | 0.9922              | 0.00                | 0.5610              | 0.8748              | -0.25               | 0.4102              | 0.6164              |
| 2247 | Iset cell autoantigen 1                                                       | Q05084  | 0.0185              | 0.0800              | -0.17               | 0.1134              | 0.6344              | -0.16               | 0.1034              | 0.2098              |
| 2248 | Isochrysin-CoA dehydrogenase, mitochondrial                                   | Q9UKU7  | 0.4108              | 0.5622              | -3.31               | 0.5752              | 0.7870              | -1.75               | 0.5661              | 0.7095              |
| 2249 | Isochorismatase domain-containing protein 1                                   | Q96CN7  | 0.0637              | 0.1671              | -0.22               | 0.2020              | 0.6597              | 0.12                | 0.1288              | 0.2495              |
| 2250 | Isochorismatase domain-containing protein 2                                   | Q96AB3  | 0.1920              | 0.3587              | -0.06               | 0.1538              | 0.6601              | -0.09               | 0.0027              | 0.0286              |
| 2251 | Isochorismatase [NAD] subunit alpha, mitochondrial                            | P50213  | 0.0705              | 0.1778              | 0.10                | 0.2765              | 0.6649              | 0.14                | 0.0285              | 0.0856              |
| 2252 | Isochorismatase [NAD] subunit beta, mitochondrial                             | O43837  | 0.0268              | 0.0992              | 0.09                | 0.4944              | 0.8169              | 0.08                | 0.8357              | 0.8677              |
| 2253 | Isochorismatase [NADP] cytoplasmic                                            | O75874  | 0.0162              | 0.0743              | 0.24                | 0.6855              | 0.7708              | 0.02                | 0.0027              | 0.0284              |
| 2254 | Isochorismatase [NADP] mitochondrial                                          | P48735  | 0.0055              | 0.0449              | -0.19               | 0.9644              | 0.9759              | 0.00                | 0.0194              | 0.0670              |
| 2255 | Isochorismatase [NADP] cytoplasmic                                            | P41252  | 0.0090              | 0.0576              | 0.15                | 0.1983              | 0.6670              | 0.18                | 0.0004              | 0.0194              |
| 2256 | Isochorismatase [NADP] mitochondrial                                          | Q9NS54  | 0.6686              | 0.6725              | 0.05                | 0.2951              | 0.6713              | 0.13                | 0.3099              | 0.4944              |
| 2257 | Isochorismatase [NADP] cytoplasmic                                            | Q13907  | 0.0265              | 0.0987              | 0.31                | 0.0182              | 0.4644              | 0.13                | 0.0087              | 0.0440              |
| 2258 | Isochorismatase [NADP] cytoplasmic                                            | Q9BXS1  | 0.0694              | 0.1755              | 0.11                | 0.6541              | 0.7448              | 0.04                | 0.2974              | 0.4786              |
| 2259 | IST1 homolog                                                                  | P53990  | 0.1618              | 0.6302              | 0.04                | 0.6258              | 0.7229              | 0.05                | 0.0165              | 0.0608              |
| 2260 | Izumo sperm-egg fusion protein 2                                              | Q6UXV1  | 0.1114              | 0.2425              | -0.10               | 0.7437              | 0.8146              | 0.03                | 0.8029              | 0.8392              |
| 2261 | Izumo sperm-egg fusion protein 3                                              | Q5V272  | 0.4108              | 0.5621              | -3.31               | 0.5752              | 0.7868              | -1.75               | 0.5661              | 0.7093              |
| 2262 | Jerk protein homolog                                                          | O75564  | 0.2778              | 0.4718              | 0.10                | 0.6523              | 0.7434              | 0.04                | 0.9067              | 0.9264              |
| 2263 | Junction plakoglobin                                                          | P14923  | 0.0791              | 0.1929              | -0.08               | 0.8735              | 0.9084              | 0.02                | 0.2977              | 0.4551              |
| 2264 | Junctional protein associated with coronary artery disease                    | Q9P266  | 0.0870              | 0.2050              | 0.06                | 0.0002              | 0.2590              | 0.31                | 0.0090              | 0.0444              |
| 2265 | Junctophilin-3                                                                | Q8WXH2  | 0.0037              | 0.0389              | 3.45                | 0.1688              | 0.6609              | 1.89                | 0.0607              | 0.1428              |
| 2266 | Junctophilin microtubule associated homolog 1                                 | Q9UK76  | 0.3349              | 0.5414              | 0.01                | 0.2636              | 0.6632              | 0.16                | 0.0009              | 0.0207              |
| 2267 | Junctophilin microtubule associated homolog 2                                 | Q9H910  | 0.0771              | 0.1898              | -0.12               | 0.4803              | 0.8054              | 0.12                | 0.5357              | 0.7569              |
| 2268 | Kalirin                                                                       | O60229  | 0.4108              | 0.5619              | -3.31               | 0.5752              | 0.7866              | -1.75               | 0.5661              | 0.7092              |
| 2269 | Kalikrein-14                                                                  | Q9PQ03  | 0.0000              | 0.0000              | 2.37                | 0.0040              | 0.3397              | 0.48                | 0.3480              | 0.5418              |
| 2270 | Kanadapin                                                                     | Q9BWU0  | 0.0133              | 0.0673              | -0.14               | 0.9299              | 0.9527              | -0.01               | 0.0321              | 0.0919              |
| 2271 | Katanin p60 ATPase-containing subunit A1                                      | O75449  | 0.4108              | 0.5618              | -3.31               | 0.5752              | 0.7864              | -1.75               | 0.5661              | 0.7090              |

Supplementary Table S2. Overview on all relatively quantified 5180 proteins statistical analysis

| Protein name                                                                   | MCF-7   |            |        |         |            |        | MDA-MB-231 |            |        |         |            |        |
|--------------------------------------------------------------------------------|---------|------------|--------|---------|------------|--------|------------|------------|--------|---------|------------|--------|
|                                                                                | p value | BH q value | log2FC | p value | BH q value | log2FC | p value    | BH q value | log2FC | p value | BH q value | log2FC |
| 2272 Katanin p60 ATPase-containing subunit A-like 1                            | Q9BW62  | 0.4108     | 0.5616 | -3.31   | 0.5752     | 0.7862 | -1.75      | 0.5661     | 0.7088 | -1.19   | 0.5388     | 0.6703 |
| 2273 Katanin p60 ATPase-containing subunit A-like 2                            | Q8IY74  | 0.0031     | 0.0364 | -0.41   | 0.2382     | 0.6627 | -0.15      | 0.0674     | 0.1666 | -0.10   | 0.0057     | 0.0302 |
| 2274 Kazrin                                                                    | Q6T478  | 0.4108     | 0.5615 | -3.31   | 0.5752     | 0.7859 | -1.75      | 0.5661     | 0.7087 | -1.19   | 0.5388     | 0.6701 |
| 2275 Kelch domain-containing protein 4                                         | Q8TBB5  | 0.0727     | 0.1818 | -0.47   | 0.5422     | 0.8573 | -0.11      | 0.3641     | 0.5615 | -0.21   | 0.6723     | 0.7135 |
| 2276 Kelch domain-containing protein 8A                                        | Q8IYD2  | 0.4108     | 0.5613 | -3.31   | 0.5752     | 0.7857 | -1.75      | 0.5661     | 0.7085 | -1.19   | 0.5388     | 0.6699 |
| 2277 Kelch domain-containing protein 9                                         | Q8NIEP  | 0.0265     | 0.0986 | -0.44   | 0.0639     | 0.5921 | -0.30      | 0.0323     | 0.0923 | -0.43   | 0.0309     | 0.0819 |
| 2278 Kelch repeat and BTH domain-containing protein 11                         | Q94819  | 0.4108     | 0.5612 | -3.31   | 0.5752     | 0.7855 | -1.75      | 0.5661     | 0.7083 | -1.19   | 0.5388     | 0.6698 |
| 2279 Kelch-like protein 13                                                     | Q9P2N7  | 0.8421     | 0.8738 | -0.08   | 0.3412     | 0.7000 | -1.50      | 0.8692     | 0.8965 | -0.06   | 0.6936     | 0.7332 |
| 2280 Kelch-like protein 15                                                     | Q96M94  | 0.4107     | 0.6320 | -0.53   | 0.6655     | 0.6628 | 1.01       | 0.5008     | 0.7232 | 0.39    | 0.3577     | 0.5358 |
| 2281 Kelch-like protein 20                                                     | Q9Y2M5  | 0.0001     | 0.0115 | 0.48    | 0.2930     | 0.6704 | 0.08       | 0.0028     | 0.0291 | 0.16    | 0.0140     | 0.0482 |
| 2282 Kelch-like protein 24                                                     | Q6TFL4  | 0.1056     | 0.2333 | -0.19   | 0.2571     | 0.6636 | -0.27      | 0.0971     | 0.1997 | -0.19   | 0.0088     | 0.0379 |
| 2283 Kelch-like protein 25                                                     | Q9H0H3  | 0.1286     | 0.2692 | 0.19    | 0.1676     | 0.6612 | 0.22       | 0.0887     | 0.1869 | 0.25    | 0.0745     | 0.1552 |
| 2284 Kelch-like protein 26                                                     | Q53HCS  | 0.4108     | 0.5610 | -3.31   | 0.5752     | 0.7853 | -1.75      | 0.5661     | 0.7081 | -1.19   | 0.5388     | 0.6696 |
| 2285 Kelch-like protein 31                                                     | Q9H511  | 0.4108     | 0.5609 | -3.31   | 0.5752     | 0.7851 | -1.75      | 0.5661     | 0.7080 | -1.19   | 0.5388     | 0.6695 |
| 2286 Kelch-like protein 5                                                      | Q96P07  | 0.2441     | 0.4296 | -0.08   | 0.0951     | 0.6299 | 0.16       | 0.2806     | 0.4559 | -0.11   | 0.0891     | 0.1779 |
| 2287 Keratin type I cuticular Ha1                                              | Q15323  | 0.0022     | 0.0321 | -0.83   | 0.0614     | 0.5934 | -1.85      | 0.0013     | 0.0235 | -1.09   | 0.0284     | 0.0772 |
| 2288 Keratin type I cuticular Ha2                                              | Q14532  | 0.1235     | 0.2610 | 0.11    | 0.0975     | 0.6146 | 0.21       | 0.2961     | 0.4768 | 0.06    | 0.0339     | 0.0874 |
| 2289 Keratin type I cuticular Ha3-II                                           | Q14525  | 0.0466     | 0.1382 | 0.24    | 0.2686     | 0.6635 | 0.10       | 0.3373     | 0.5298 | -0.15   | 0.3375     | 0.5113 |
| 2290 Keratin type I cuticular Ha5                                              | Q92764  | 0.7285     | 0.7787 | 0.02    | 0.4730     | 0.8017 | 0.15       | 0.1053     | 0.2125 | 0.12    | 0.0214     | 0.0634 |
| 2291 Keratin type I cuticular Ha6                                              | Q76013  | 0.0022     | 0.0320 | 0.40    | 0.0147     | 0.4506 | 0.25       | 0.2206     | 0.3775 | 0.05    | 0.0654     | 0.1409 |
| 2292 Keratin type I cuticular Ha7                                              | Q76014  | 0.0006     | 0.0198 | -0.27   | 0.1834     | 0.6648 | -0.40      | 0.2892     | 0.4683 | 0.44    | 0.0340     | 0.0876 |
| 2293 Keratin type I cuticular Ha8                                              | Q76015  | 0.0047     | 0.0432 | -0.52   | 0.2996     | 0.6739 | -0.40      | 0.1551     | 0.2870 | -0.15   | 0.3324     | 0.5057 |
| 2294 Keratin type I cuticular Ha9                                              | Q94956  | 0.0008     | 0.0209 | -0.36   | 0.9637     | 0.9754 | 0.01       | 0.0796     | 0.1719 | 0.15    | 0.3752     | 0.5585 |
| 2295 Keratin type I cytoskeletal 13                                            | P13646  | 0.6887     | 0.7443 | -0.03   | 0.1430     | 0.8365 | 0.09       | 0.7492     | 0.7915 | -0.03   | 0.8896     | 0.9059 |
| 2296 Keratin type I cytoskeletal 14                                            | P02533  | 0.0250     | 0.0954 | 0.20    | 0.2695     | 0.6629 | 0.13       | 0.0013     | 0.0224 | 0.50    | 0.1561     | 0.2737 |
| 2297 Keratin type I cytoskeletal 15                                            | P19012  | 0.0361     | 0.1190 | 0.15    | 0.1634     | 0.6633 | 0.15       | 0.0032     | 0.0304 | 0.28    | 0.0104     | 0.0410 |
| 2298 Keratin type I cytoskeletal 16                                            | P08779  | 0.0796     | 0.1934 | 0.14    | 0.2136     | 0.6621 | 0.25       | 0.0302     | 0.0883 | 0.28    | 0.0098     | 0.0397 |
| 2299 Keratin type I cytoskeletal 17                                            | Q04695  | 0.0000     | 0.0000 | 1.03    | 0.0108     | 0.4405 | 0.20       | 0.0059     | 0.0309 | 0.33    | 0.0020     | 0.0352 |
| 2300 Keratin type I cytoskeletal 18                                            | P05783  | 0.0039     | 0.0395 | 0.31    | 0.1190     | 0.6348 | 0.30       | 0.0084     | 0.0432 | 0.27    | 0.0000     | 0.0000 |
| 2301 Keratin type I cytoskeletal 19                                            | P08727  | 0.0065     | 0.0482 | 0.38    | 0.1960     | 0.6693 | 0.31       | 0.0545     | 0.1328 | 0.18    | 0.0014     | 0.0168 |
| 2302 Keratin type I cytoskeletal 20                                            | P35900  | 0.5547     | 0.6240 | -0.08   | 0.1906     | 0.6685 | 0.14       | 0.5738     | 0.6313 | -0.07   | 0.1616     | 0.2809 |
| 2303 Keratin type I cytoskeletal 24                                            | Q2M215  | 0.3633     | 0.5760 | 0.03    | 0.3328     | 0.6915 | 0.13       | 0.0907     | 0.1896 | 0.12    | 0.0068     | 0.0333 |
| 2304 Keratin type I cytoskeletal 25                                            | Q72320  | 0.0284     | 0.1024 | -0.66   | 0.2621     | 0.6636 | -0.92      | 0.0525     | 0.1295 | -0.91   | 0.0167     | 0.0538 |
| 2305 Keratin type I cytoskeletal 26                                            | Q723Y9  | 0.7728     | 0.8153 | 0.02    | 0.1931     | 0.6682 | 0.17       | 0.6906     | 0.7388 | 0.04    | 0.1227     | 0.2263 |
| 2306 Keratin type I cytoskeletal 28                                            | Q723Y7  | 0.0673     | 0.1719 | 0.11    | 0.3782     | 0.7256 | 0.05       | 0.0920     | 0.1913 | 0.07    | 0.0015     | 0.0171 |
| 2307 Keratin type I cytoskeletal 39                                            | Q6A163  | 0.4108     | 0.5607 | -3.31   | 0.5752     | 0.7849 | -1.75      | 0.5661     | 0.7078 | -1.19   | 0.5388     | 0.6693 |
| 2308 Keratin type II cuticular Hb2                                             | Q9NSB4  | 0.0003     | 0.0155 | 0.22    | 0.1730     | 0.6604 | 0.26       | 0.0001     | 0.0162 | 0.33    | 0.0000     | 0.0000 |
| 2309 Keratin type II cuticular Hb4                                             | P35900  | 0.4108     | 0.5613 | -3.31   | 0.5752     | 0.7851 | -1.75      | 0.5661     | 0.7080 | -1.19   | 0.5388     | 0.6695 |
| 2310 Keratin type II cuticular Hb5                                             | P78386  | 0.5970     | 0.6630 | -0.03   | 0.2421     | 0.6597 | 0.10       | 0.0649     | 0.1487 | -0.07   | 0.0169     | 0.0542 |
| 2311 Keratin type II cuticular Hb6                                             | Q43790  | 0.3392     | 0.5472 | -0.07   | 0.3391     | 0.6987 | 0.21       | 0.8399     | 0.8710 | 0.02    | 0.0186     | 0.0576 |
| 2312 Keratin type II cytoskeletal 3                                            | P12035  | 0.0818     | 0.1970 | 0.23    | 0.6889     | 0.7721 | 0.05       | 0.0481     | 0.1217 | 0.08    | 0.1419     | 0.2536 |
| 2313 Keratin type II cytoskeletal 4                                            | P19013  | 0.0473     | 0.1397 | 0.10    | 0.7369     | 0.8089 | -0.01      | 0.0349     | 0.0970 | 0.10    | 0.0353     | 0.0900 |
| 2314 Keratin type II cytoskeletal 5                                            | P13647  | 0.0004     | 0.0167 | 0.18    | 0.1639     | 0.6638 | 0.18       | 0.3821     | 0.5828 | 0.02    | 0.0000     | 0.0000 |
| 2315 Keratin type II cytoskeletal 6A                                           | P02538  | 0.0215     | 0.0873 | 0.21    | 0.1842     | 0.6640 | 0.25       | 0.0001     | 0.0157 | 0.27    | 0.0119     | 0.0438 |
| 2316 Keratin type II cytoskeletal 6B                                           | P04259  | 0.2389     | 0.4235 | 0.05    | 0.9377     | 0.9579 | -0.01      | 0.0129     | 0.0531 | 0.27    | 0.0274     | 0.0751 |
| 2317 Keratin type II cytoskeletal 7                                            | P08729  | 0.4399     | 0.5174 | -0.02   | 0.5886     | 0.6942 | 0.05       | 0.0204     | 0.0687 | 0.08    | 0.0154     | 0.0513 |
| 2318 Keratin type II cytoskeletal 71                                           | Q3SY84  | 0.0271     | 0.0999 | 0.28    | 0.2477     | 0.6649 | 0.23       | 0.0128     | 0.0530 | 0.36    | 0.0277     | 0.0758 |
| 2319 Keratin type II cytoskeletal 72                                           | Q14CN4  | 0.0272     | 0.1000 | 0.15    | 0.3687     | 0.7175 | 0.05       | 0.0056     | 0.0362 | 0.25    | 0.0136     | 0.0472 |
| 2320 Keratin type II cytoskeletal 73                                           | Q86Y46  | 0.0026     | 0.0339 | 0.26    | 0.1839     | 0.6643 | 0.23       | 0.0046     | 0.0335 | 0.20    | 0.0014     | 0.0171 |
| 2321 Keratin type II cytoskeletal 74                                           | Q7RTS7  | 0.0007     | 0.0205 | 0.45    | 0.0317     | 0.5100 | 0.28       | 0.0061     | 0.0379 | 0.59    | 0.0009     | 0.0150 |
| 2322 Keratin type II cytoskeletal 75                                           | Q95678  | 0.0095     | 0.0574 | 0.34    | 0.1339     | 0.6638 | 0.22       | 0.3920     | 0.5937 | 0.06    | 0.0027     | 0.0216 |
| 2323 Keratin type II cytoskeletal 78                                           | Q8N1N4  | 0.7564     | 0.8017 | 0.01    | 0.1397     | 0.6531 | 0.17       | 0.0669     | 0.1521 | 0.21    | 0.9868     | 0.9887 |
| 2324 Keratin type II cytoskeletal 79                                           | Q5XKES  | 0.0056     | 0.0453 | 0.06    | 0.0437     | 0.5702 | 0.20       | 0.0031     | 0.0505 | 0.10    | 0.0004     | 0.0120 |
| 2325 Keratin type II cytoskeletal 80                                           | P05787  | 0.0058     | 0.0459 | 0.47    | 0.1548     | 0.6616 | 0.39       | 0.0054     | 0.0360 | 0.43    | 0.0008     | 0.0146 |
| 2326 Keratin type II cytoskeletal 8                                            | Q6KB66  | 0.0050     | 0.0435 | 0.13    | 0.2482     | 0.6583 | 0.17       | 0.1266     | 0.2463 | 0.12    | 0.0032     | 0.0229 |
| 2327 Keratin-like protein KRT222                                               | KRNLAD  | 0.0398     | 0.1258 | 0.18    | 0.1000     | 0.8321 | 0.07       | 0.0498     | 0.1247 | 0.41    | 0.0563     | 0.1258 |
| 2328 Keratinocyte-associated protein 2                                         | Q8N6L1  | 0.1646     | 0.3219 | -0.11   | 0.0428     | 0.5685 | -0.47      | 0.0091     | 0.0446 | -0.37   | 0.0085     | 0.0373 |
| 2329 KH domain-containing RNA-binding signal transduction-associated protein 1 | Q07666  | 0.5845     | 0.6515 | -0.05   | 0.2005     | 0.6628 | -0.23      | 0.0013     | 0.0228 | -0.22   | 0.5912     | 0.6396 |
| 2330 KH domain-containing RNA-binding signal transduction-associated protein 2 | Q5VWX1  | 0.4108     | 0.5606 | -3.31   | 0.5752     | 0.7847 | -1.75      | 0.5661     | 0.7076 | -1.19   | 0.5388     | 0.6691 |
| 2331 KICSTOR complex protein SZT2                                              | Q5T011  | 0.4108     | 0.5604 | -3.31   | 0.5752     | 0.7845 | -1.75      | 0.5661     | 0.7075 | -1.19   | 0.5388     | 0.6690 |
| 2332 KIF1-binding protein                                                      | Q96KE5  | 0.1685     | 0.3270 | 0.13    | 0.1898     | 0.6706 | 0.27       | 0.0104     | 0.0476 | 0.41    | 0.0097     | 0.0395 |
| 2333 Killer cell immunoglobulin-like receptor 2DL3                             | P43628  | 0.0530     | 0.1495 | -0.43   | 0.0130     | 0.4430 | -0.46      | 0.0601     | 0.1418 | -0.23   | 0.0009     | 0.0146 |
| 2334 Killer cell lectin-like receptor subfamily B member 1                     | Q12918  | 0.2433     | 0.4287 | 0.51    | 0.4699     | 0.7996 | 0.44       | 0.0404     | 0.1073 | 0.32    | 0.0225     | 0.0655 |
| 2335 Kinase D-interacting substrate of 220 kDa                                 | Q5ULH0  | 0.2196     | 0.3957 | -0.20   | 0.1965     | 0.7176 | -0.03      | 0.5967     | 0.6449 | -0.08   | 0.3280     | 0.4250 |
| 2336 Kinecin                                                                   | Q86U92  | 0.0218     | 0.0878 | 0.10    | 0.2770     | 0.6646 | 0.14       | 0.1020     | 0.0512 | 0.22    | 0.0023     | 0.0204 |
| 2337 Kinesin heavy chain isoform 5A                                            | Q12840  | 0.3526     | 0.5625 | 0.05    | 0.1909     | 0.6686 | 0.11       | 0.0597     | 0.1414 | 0.15    | 0.0338     | 0.0873 |
| 2338 Kinesin heavy chain isoform 5C                                            | Q60232  | 0.0001     | 0.0113 | 0.34    | 0.0968     | 0.6347 | 0.39       | 0.0095     | 0.0209 | 0.37    | 0.0009     | 0.0401 |
| 2339 Kinesin light chain 1                                                     | Q07866  | 0.0393     | 0.1248 | -0.04   | 0.3366     | 0.6955 | 0.19       | 0.0201     | 0.0681 | 0.24    | 0.0004     | 0.0113 |
| 2340 Kinesin light chain 2                                                     | Q9H0B6  | 0.0204     | 0.0845 | -0.17   | 0.9584     | 0.9717 | -0.01      | 0.3840     | 0.5845 | -0.12   | 0.9796     | 0.9823 |
| 2341 Kinesin light chain 4                                                     | Q9NSK0  | 0.1602     | 0.3150 | 0.07    | 0.0865     | 0.6197 | 0.20       | 0.0039     | 0.0320 | 0.26    | 0.0021     | 0.0201 |
| 2342 Kinesin-1 heavy chain                                                     | P31716  | 0.2581     | 0.4468 | 0.09    | 0.2005     | 0.6632 | 0.20       | 0.0652     | 0.1492 | 0.21    | 0.1075     | 0.2051 |
| 2343 Kinesin-like protein KIF11                                                | P52732  | 0.4108     | 0.5603 | -3.31   | 0.5752     | 0.7843 | -1.75      | 0.5661     | 0.7073 | -1.19   | 0.5388     | 0.6688 |
| 2344 Kinesin-like protein KIF13B                                               | Q9NQ78  | 0.4108     | 0.5601 | -3.31   | 0.5752     | 0.7841 | -1.75      | 0.5661     | 0.7071 | -1.19   | 0.5388     | 0.6687 |
| 2345 Kinesin-like protein KIF15                                                | Q9NS87  | 0.4108     | 0.5600 | -3.31   | 0.5752     | 0.7839 | -1.75      | 0.5661     | 0.7069 | -1.19   | 0.5388     | 0.6685 |
| 2346 Kinesin-like protein KIF16B                                               | Q96L93  | 0.9138     | 0.9336 | 0.01    | 0.3909     | 0.7350 | 0.16       | 0.1000     | 0.2040 | 0.20    | 0.3456     | 0.5212 |
| 2347 Kinesin-like protein KIF18A                                               | Q8N177  | 0.4139     | 0.4919 | -0.06   | 0.4348     | 0.7708 | -0.07      | 0.3830     | 0.5839 | 0.07    | 0.0782     | 0.1612 |
| 2348 Kinesin-like protein KIF1A                                                | Q12756  | 0.4108     | 0.5598 | -3.31   | 0.5752     | 0.7837 | -1.75      | 0.5661     | 0.7068 | -1.19   | 0.5388     | 0.6683 |
| 2349 Kinesin-like protein KIF1B                                                | Q60333  | 0.2563     | 0.4442 | 0.08    | 0.1648     | 0.6607 | 0.17       | 0.1483     | 0.2767 | 0.21    | 0.0028     | 0.0216 |
| 2350 Kinesin-like protein KIF27                                                | Q86VH2  | 0.0005     | 0.0185 | 0.34    | 0.0628     | 0.5915 | 0.26       | 0.0054     | 0.0360 | 0.42    | 0.0012     | 0.0161 |
| 2351 Kinesin-like protein KIF28P                                               | BTZC32  | 0.0871     | 0.2052 | 0.07    | 0.1020     | 0.6320 | 0.16       | 0.0004     | 0.0211 | 0.17    | 0.0125     | 0.0453 |

Supplementary Table S2. Overview on all relatively quantified 5180 proteins statistical analysis

| Protein name                                                                   | UniProt    | MCF-7               |                     |                     |                     | MDA-MB-231          |                     |                     |                     |            |        |        |        |        |        |        |        |        |        |        |        |        |        |        |        |        |        |       |
|--------------------------------------------------------------------------------|------------|---------------------|---------------------|---------------------|---------------------|---------------------|---------------------|---------------------|---------------------|------------|--------|--------|--------|--------|--------|--------|--------|--------|--------|--------|--------|--------|--------|--------|--------|--------|--------|-------|
|                                                                                |            | Dai SC20 vs control | Gen SC20 vs control | SSE SC20 vs control | Dai IC20 vs control | Gen IC20 vs control | SSE IC20 vs control | Dai IC20 vs control | Gen IC20 vs control |            |        |        |        |        |        |        |        |        |        |        |        |        |        |        |        |        |        |       |
| p value                                                                        | BH q value | log2FC              | p value             | BH q value          | log2FC              | p value             | BH q value          | log2FC              | p value             | BH q value | log2FC |        |        |        |        |        |        |        |        |        |        |        |        |        |        |        |        |       |
| 2352 Kinesin-like protein KIF2A                                                | O00139     | 0.0889              | 0.2079              | 0.13                | 0.3041              | 0.6769              | 0.10                | 0.0089              | 0.0441              | 0.29       | 0.0863 | 0.1739 | 0.14   | 0.7714 | 0.8215 | -0.01  | 0.3656 | 0.5723 | 0.05   | 0.0309 | 0.1488 | 0.45   | 0.3178 | 0.6676 | 0.12   | 0.2893 | 0.3613 | -0.11 |
| 2353 Kinesin-like protein KIF2C                                                | Q99661     | 0.1260              | 0.2650              | 0.11                | 0.0819              | 0.9874              | 0.00                | 0.0012              | 0.0223              | 0.55       | 0.0015 | 0.0179 | 0.34   | 0.4665 | 0.5577 | -0.00  | 0.0005 | 0.0365 | 0.58   | 0.0421 | 0.3238 | 0.15   | 0.8927 | 0.9199 | -0.01  | 0.6831 | 0.7363 | -0.02 |
| 2354 Kinesin-like protein KIF3B                                                | I15066     | 0.4108              | 0.5597              | -3.31               | 0.5752              | 0.7835              | -1.75               | 0.5661              | 0.7066              | -1.19      | 0.5388 | 0.6682 | 0.89   | 0.2938 | 0.4561 | -1.88  | 0.9510 | 1.0742 | 0.09   | 0.0449 | 0.1701 | 0.42   | 0.6269 | 1.0623 | 0.05   | 0.1251 | 0.1846 | 0.16  |
| 2355 Kinesin-like protein KIF3C                                                | I14782     | 0.0012              | 0.0241              | 1.10                | 0.1774              | 0.6630              | 0.66                | 0.0037              | 0.0318              | 0.96       | 0.0002 | 0.0104 | 1.32   | 0.3021 | 0.4002 | -0.12  | 0.0029 | 0.0354 | 1.10   | 0.2451 | 0.4791 | 0.21   | 0.6364 | 1.0738 | -0.35  | 0.0170 | 0.1115 | -0.66 |
| 2356 Kinesin-like protein KIF7                                                 | Q2M1P5     | 0.4108              | 0.5595              | -3.31               | 0.5752              | 0.7833              | -1.75               | 0.5661              | 0.7064              | -1.19      | 0.5388 | 0.6680 | 0.89   | 0.2938 | 0.4559 | -1.88  | 0.9510 | 1.0739 | 0.09   | 0.2642 | 0.5057 | -0.14  | 0.0323 | 0.1630 | -0.45  | 0.0186 | 0.1175 | -0.40 |
| 2357 Kinesin-like protein KIF9                                                 | Q9HAA2     | 0.0487              | 0.1416              | 0.16                | 0.3518              | 0.7044              | 0.06                | 0.0056              | 0.0362              | 0.33       | 0.0092 | 0.0386 | 0.28   | 0.0018 | 0.0334 | -0.30  | 0.0083 | 0.0671 | 0.25   | 0.3736 | 0.6179 | -2.55  | 0.8708 | 1.2440 | -0.33  | 0.0651 | 0.2038 | -2.06 |
| 2358 Kinesin-like protein KIFC1                                                | QBW19      | 0.1040              | 0.1040              | 0.19                | 0.1050              | 0.6317              | 0.22                | 0.0099              | 0.0214              | 0.51       | 0.0887 | 0.1774 | 0.14   | 0.5260 | 0.6124 | -0.03  | 0.0167 | 0.0847 | 0.32   | 0.6907 | 0.7323 | 0.03   | 0.0121 | 0.0918 | -0.20  | 0.2428 | 0.3132 | -0.05 |
| 2359 Kinetochore protein NDC80 homolog                                         | I14777     | 0.4108              | 0.5594              | -3.31               | 0.5752              | 0.7831              | -1.75               | 0.5661              | 0.7063              | -1.19      | 0.5388 | 0.6679 | 0.89   | 0.2938 | 0.4558 | -1.88  | 0.9510 | 1.0737 | 0.09   | 0.0364 | 0.1583 | 0.13   | 0.0005 | 0.0212 | -0.26  | 0.0456 | 0.1869 | 0.10  |
| 2360 Kinetochore protein Spc24                                                 | Q8NBT2     | 0.0007              | 0.0204              | 1.85                | 0.0419              | 0.5727              | 0.38                | 0.1222              | 0.3669              | -0.10      | 0.0168 | 0.0541 | 0.30   | 0.0148 | 0.0869 | -0.28  | 0.0019 | 0.0521 | 0.73   | 0.3736 | 0.6449 | -2.55  | 0.8708 | 1.2906 | -0.33  | 0.0651 | 0.2213 | 2.06  |
| 2361 Kinetochore protein Spc25                                                 | Q9HBM1     | 0.8692              | 0.8964              | 0.05                | 0.6982              | 0.7778              | -0.41               | 0.4358              | 0.6465              | -0.31      | 0.4749 | 0.6749 | -0.30  | 0.7376 | 0.7945 | -0.11  | 0.2735 | 0.4677 | -0.38  | 0.3736 | 0.4865 | -2.55  | 0.8708 | 1.0087 | -0.33  | 0.0651 | 0.1348 | 2.06  |
| 2362 Klotho                                                                    | Q9UEF7     | 0.0820              | 0.1972              | 0.50                | 0.1959              | 0.4633              | 0.85                | 0.0195              | 0.0673              | 0.87       | 0.0386 | 0.0960 | 0.81   | 0.0101 | 0.0724 | 1.25   | 0.0700 | 0.1860 | 0.59   | 0.3736 | 0.5492 | -2.55  | 0.8708 | 1.1226 | -0.33  | 0.0651 | 0.1647 | 2.06  |
| 2363 Kruppel-like factor 11                                                    | I14901     | 0.0191              | 0.0812              | 0.18                | 0.1871              | 0.6670              | 0.22                | 0.0235              | 0.0754              | 0.25       | 0.0237 | 0.0681 | 0.17   | 0.4187 | 0.5131 | 0.03   | 0.0431 | 0.1368 | 0.13   | 0.3736 | 0.5672 | -2.55  | 0.8708 | 1.1548 | -0.33  | 0.0651 | 0.1743 | 2.06  |
| 2364 Kunitz-type protease inhibitor 1                                          | O43278     | 0.3196              | 0.5227              | 0.07                | 0.2153              | 0.6603              | 0.17                | 0.2429              | 0.4075              | 0.09       | 0.0326 | 0.0852 | 0.22   | 0.6695 | 0.7338 | -0.03  | 0.0643 | 0.1769 | 0.19   | 0.3736 | 0.5520 | -2.55  | 0.8708 | 1.1277 | -0.33  | 0.0651 | 0.1662 | 2.06  |
| 2365 Kunitz-type protease inhibitor 2                                          | O43291     | 0.0916              | 0.2122              | 0.10                | 0.0569              | 0.5860              | -0.13               | 0.0038              | 0.0321              | -0.30      | 0.0684 | 0.1454 | -0.12  | 0.2029 | 0.4041 | -0.06  | 0.7999 | 1.0366 | -0.05  | 0.3736 | 0.4385 | -2.55  | 0.8708 | 0.9192 | -0.33  | 0.0651 | 0.1149 | 2.06  |
| 2366 Kunitz-type protease inhibitor 4                                          | O6UDR6     | 0.4108              | 0.5592              | -3.31               | 0.5752              | 0.7829              | -1.75               | 0.5661              | 0.7061              | -1.19      | 0.5388 | 0.6677 | 0.89   | 0.2938 | 0.4557 | -1.88  | 0.9510 | 1.0735 | 0.09   | 0.3375 | 0.6079 | 0.07   | 0.2542 | 0.5785 | 0.07   | 0.0119 | 0.0938 | -0.28 |
| 2367 Kv channel-interacting protein 1                                          | Q9NZ12     | 0.2290              | 0.4097              | 0.05                | 0.1793              | 0.6648              | 0.08                | 0.0004              | 0.0195              | 0.36       | 0.0062 | 0.0317 | 0.24   | 0.5708 | 0.6511 | 0.02   | 0.0137 | 0.0776 | 0.26   | 0.3736 | 0.6057 | -2.55  | 0.8708 | 1.2228 | -0.33  | 0.0651 | 0.1963 | 2.06  |
| 2368 Kv channel-interacting protein 2                                          | Q9NS61     | 0.6902              | 0.7458              | -0.03               | 0.2025              | 0.6754              | -0.12               | 0.0532              | 0.1307              | -0.23      | 0.0133 | 0.0468 | -0.42  | 0.0778 | 0.2144 | -0.22  | 0.1119 | 0.2528 | -0.28  | 0.0186 | 0.1263 | 0.34   | 0.1956 | 0.4904 | 0.11   | 0.2253 | 0.2955 | -0.09 |
| 2369 Kynreninase                                                               | I16719     | 0.0042              | 0.0406              | -0.53               | 0.0548              | 0.5877              | -0.24               | 0.0000              | -0.51               | 0.0025     | 0.0215 | -0.61  | 0.0161 | 0.0908 | -0.58  | 0.1299 | 0.2806 | -0.56  | 0.3736 | 0.5243 | -2.55  | 0.8708 | 1.0778 | -0.33  | 0.0651 | 0.1523 | 2.06   |       |
| 2370 L-2-hydroxyglutarate dehydrogenase mitochondrial                          | Q9H9P8     | 0.0458              | 0.1367              | -0.15               | 0.4777              | 0.8039              | 0.04                | 0.0716              | 0.6889              | 0.04       | 0.0189 | 0.0851 | -0.23  | 0.0638 | 0.1913 | -0.16  | 0.2661 | 0.4590 | -0.10  | 0.3736 | 0.4876 | -2.55  | 0.8708 | 1.0107 | -0.33  | 0.0651 | 0.1353 | 2.06  |
| 2371 Lactacystin-binding protein 1                                             | Q8V120     | 0.3067              | 0.5077              | -0.36               | 0.8787              | 0.9127              | -0.05               | 0.6840              | 0.7333              | 0.13       | 0.6110 | 0.6581 | -0.16  | 0.9965 | 0.9980 | 0.00   | 0.8707 | 1.0648 | -0.07  | 0.3736 | 0.4362 | -2.55  | 0.8708 | 0.9148 | -0.33  | 0.0651 | 0.1140 | 2.06  |
| 2372 Lactoferrin                                                               | P02788     | 0.1713              | 0.3317              | 0.31                | 0.5027              | 0.8235              | -0.19               | 0.2602              | 0.4294              | 0.16       | 0.7359 | 0.7723 | -0.04  | 0.5755 | 0.6549 | -0.04  | 0.7527 | 0.9016 | 0.15   | 0.0000 | 0.0000 | 0.0000 | 0.0000 | 1.09   | 0.0011 | 0.0419 | 0.71   |       |
| 2373 Lactylglutathione lyase                                                   | Q04760     | 0.0415              | 0.1290              | 0.21                | 0.6760              | 0.7627              | 0.05                | 0.2214              | 0.3786              | 0.08       | 0.6888 | 0.7286 | 0.03   | 0.1342 | 0.3036 | -0.11  | 0.0691 | 0.1848 | 0.16   | 0.8873 | 0.9069 | -0.02  | 0.1089 | 0.3360 | -0.21  | 0.0210 | 0.1238 | -0.43 |
| 2374 Ladinin-1                                                                 | O00515     | 0.0003              | 0.0154              | -0.62               | 0.0155              | 0.4588              | -0.26               | 0.0068              | 0.0399              | -0.18      | 0.0069 | 0.0336 | -0.19  | 0.0002 | 0.0140 | -0.38  | 0.1456 | 0.3013 | -0.19  | 0.3736 | 0.5180 | -2.55  | 0.8708 | 1.0664 | -0.33  | 0.0651 | 0.1493 | 2.06  |
| 2375 Lambda-crystallin homolog                                                 | Q9Y2S2     | 0.0007              | 0.0203              | -1.17               | 0.0933              | 0.6309              | -0.27               | 0.1048              | 0.2117              | -0.25      | 0.0044 | 0.0992 | -0.35  | 0.0553 | 0.1755 | -0.36  | 0.0712 | 0.0855 | -0.54  | 0.3736 | 0.5980 | -2.55  | 0.8708 | 1.2093 | -0.33  | 0.0651 | 0.1917 | 2.06  |
| 2376 Lamina-associated polypeptide 2 isoform alpha                             | P42166     | 0.0389              | 0.1238              | 0.09                | 0.3127              | 0.6806              | 0.16                | 0.0193              | 0.0667              | 0.15       | 0.0356 | 0.0905 | 0.09   | 0.0020 | 0.0349 | -0.29  | 0.0435 | 0.6311 | 0.03   | 0.5223 | 0.5754 | 0.04   | 0.0822 | 0.2818 | 0.18   | 0.2488 | 0.3197 | 0.15  |
| 2377 Lamina-associated polypeptide 2 isoforms beta/gamma                       | P42167     | 0.0959              | 0.2185              | -0.16               | 0.0927              | 0.5077              | -0.28               | 0.0480              | 0.1216              | -0.22      | 0.0140 | 0.0481 | -0.39  | 0.0248 | 0.1139 | -0.35  | 0.0209 | 0.0935 | -0.38  | 0.1207 | 0.2907 | 0.18   | 0.9330 | 0.9514 | 0.01   | 0.2805 | 0.3523 | 0.09  |
| 2378 Lamin-B1                                                                  | P20700     | 0.2073              | 0.3800              | 0.09                | 0.3291              | 0.6885              | 0.16                | 0.0140              | 0.0555              | 0.26       | 0.0283 | 0.0772 | 0.21   | 0.6816 | 0.7450 | -0.02  | 0.0588 | 0.1671 | 0.18   | 0.0121 | 0.1039 | 0.37   | 0.4870 | 0.8977 | 0.06   | 0.0148 | 0.1046 | 0.47  |
| 2379 Lamin-B2                                                                  | Q03252     | 0.4108              | 0.5591              | -3.31               | 0.5752              | 0.7826              | -1.75               | 0.5661              | 0.7059              | -1.19      | 0.5388 | 0.6675 | 0.89   | 0.2938 | 0.4555 | -1.88  | 0.9510 | 1.0735 | 0.09   | 0.0139 | 0.1109 | 0.37   | 0.1086 | 0.3354 | 0.02   | 0.1453 | 0.2074 | 0.29  |
| 2380 Laminin subunit alpha-5                                                   | I15230     | 0.2112              | 0.3841              | 0.05                | 0.1994              | 0.6638              | 0.15                | 0.0079              | 0.0419              | 0.19       | 0.0025 | 0.0212 | 0.24   | 0.4928 | 0.5824 | 0.02   | 0.0104 | 0.0699 | 0.17   | 0.0014 | 0.0497 | -1.67  | 0.0093 | 0.0791 | -1.16  | 0.0552 | 0.2077 | -1.09 |
| 2381 Laminin subunit beta-1                                                    | P07942     | 0.0028              | 0.0355              | 0.16                | 0.0900              | 0.4357              | 0.26                | 0.2990              | 0.4809              | 0.05       | 0.8157 | 0.8407 | -0.01  | 0.0002 | 0.0120 | 0.27   | 0.2319 | 0.4158 | -0.16  | 0.1773 | 0.3769 | 0.59   | 0.0065 | 0.0656 | 0.83   | 0.135  | 0.1009 | 0.94  |
| 2382 L-aminooxidase-semialdehyde dehydrogenase-phosphopantetheinyl transferase | Q9NRN7     | 0.0015              | 0.0265              | -0.45               | 0.1516              | 0.6605              | -0.10               | 0.0723              | 0.1606              | 0.13       | 0.9276 | 0.9366 | -0.01  | 0.4694 | 0.5603 | 0.04   | 0.1894 | 0.3627 | -0.08  | 0.0578 | 0.1914 | 0.52   | 0.0171 | 0.1107 | 0.32   | 0.1097 | 0.1668 | 0.16  |
| 2383 LanC-like protein 2                                                       | Q9NS86     | 0.4108              | 0.5590              | -3.31               | 0.5752              | 0.7824              | -1.75               | 0.5661              | 0.7058              | -1.19      | 0.5388 | 0.6674 | 0.89   | 0.2938 | 0.4554 | -1.88  | 0.9510 | 1.0730 | 0.09   | 0.4081 | 0.4638 | -0.05  | 0.7175 | 1.1622 | -0.02  | 0.7398 | 0.7856 | 0.02  |
| 2384 L16850                                                                    | I16850     | 0.0073              | 0.0504              | -0.12               | 0.2557              | 0.6613              | -0.12               | 0.0076              | 0.0413              | -0.17      | 0.1569 | 0.7221 | -0.01  | 0.0081 | 0.0649 | -0.12  | 0.3914 | 0.6032 | 0.02   | 0.0086 | 0.0934 | 0.32   | 0.0246 | 0.1399 | 0.23   | 0.0062 | 0.0743 | 0.35  |
| 2385 Lanosterol synthase                                                       | P48449     | 0.4108              | 0.5588              | -3.31               | 0.5752              | 0.7822              | -1.75               | 0.5661              | 0.7056              | -1.19      | 0.5388 | 0.6672 | 0.89   | 0.2938 | 0.4552 | -1.88  | 0.9510 | 1.0728 | 0.09   | 0.0273 | 0.1431 | 0.39   | 0.0632 | 0.2414 | 0.26   | 0.0964 | 0.1514 | 0.10  |
| 2386 La-related protein 1                                                      | O6PKG0     | 0.0063              | 0.0476              | 0.13                | 0.0496              | 0.5735              | 0.20                | 0.0023              | 0.0270              | 0.31       | 0.0205 | 0.0615 | 0.20   | 0.0262 | 0.1171 | 0.08   | 0.0040 | 0.0601 | 0.21   | 0.2303 | 0.4576 | 0.12   | 0.0486 | 0.7951 | 0.06   | 0.0156 | 0.1732 | -0.16 |
| 2387 La-related protein 1B                                                     | Q65934     | 0.0375              | 0.1216              | 0.26                | 0.0450              | 0.5658              | 0.36                | 0.0028              | 0.0293              | 0.58       | 0.0035 | 0.0239 | 0.52   | 0.0733 | 0.2069 | 0.19   | 0.0074 | 0.0650 | 0.54   | 0.3736 | 0.6205 | -2.55  | 0.8708 | 1.2485 | -0.33  | 0.0651 | 0.2054 | 2.06  |
| 2388 La-related protein 4                                                      | Q7JBC2     | 0.2400              | 0.4246              | 0.11                | 0.2177              | 0.7930              | 0.14                | 0.3399              | 0.5244              | 0.08       | 0.3165 | 0.2035 | 0.18   | 0.5566 | 0.6307 | -0.05  | 0.3923 | 0.5917 | 0.08   | 0.3096 | 0.5609 | 0.79   | 0.5766 | 1.0070 | 0.49   | 0.4022 | 0.4737 | 0.62  |
| 2389 La-related protein 4B                                                     | Q9G215     | 0.4381              | 0.5156              | -0.13               | 0.2737              | 0.6616              | -0.48               | 0.2599              | 0.4178              | 0.22       | 0.4226 | 0.6146 | 0.29   | 0.1441 | 0.3184 | -0.31  | 0.2602 | 0.4517 | -0.23  | 0.1075 | 0.2677 | 0.22   | 0.0562 | 0.2265 | 0.30   | 0.1425 | 0.2039 | 0.20  |
| 2390 La-related protein 7                                                      | Q4G033     | 0.0593              | 0.1609              | -1.50               | 0.1787              | 0.6645              | -1.62               | 0.0599              | 0.1417              | 0.22       | 0.0171 | 0.0545 | 0.54   | 0.0157 | 0.0893 |        |        |        |        |        |        |        |        |        |        |        |        |       |



Supplementary Table S2. Overview on all relatively quantified 5180 proteins statistical analysis

|              |                                                                 |        | MCF-7   |         |            |        | Gen SC20 vs control |            |        |         | SSE SC20 vs control |        |         |            | Dai IC20 vs control |         |            |        | Gen IC20 vs control |            |        |         | SSE IC20 vs control |        |         |            | MDA-MB-231 |         |            |        | Dai IC20 vs control |            |        |         | Gen IC20 vs control |        |  |  | SSE IC20 vs control |  |  |  |
|--------------|-----------------------------------------------------------------|--------|---------|---------|------------|--------|---------------------|------------|--------|---------|---------------------|--------|---------|------------|---------------------|---------|------------|--------|---------------------|------------|--------|---------|---------------------|--------|---------|------------|------------|---------|------------|--------|---------------------|------------|--------|---------|---------------------|--------|--|--|---------------------|--|--|--|
| Protein name |                                                                 |        | UniProt | p value | BH q value | log2FC | p value             | BH q value | log2FC | p value | BH q value          | log2FC | p value | BH q value | log2FC              | p value | BH q value | log2FC | p value             | BH q value | log2FC | p value | BH q value          | log2FC | p value | BH q value | log2FC     | p value | BH q value | log2FC | p value             | BH q value | log2FC | p value | BH q value          | log2FC |  |  |                     |  |  |  |
| 2429         | LIM and senescent cell antigen-like-containing domain protein 2 | Q7Z4I7 | 0.4108  | 0.5569  | -3.31      | 0.5752 | 0.7796              | -1.75      | 0.5661 | 0.7034  | -1.19               | 0.5388 | 0.6652  | 0.89       | 0.2938              | 0.4535  | -1.88      | 0.9510 | 1.0697              | 0.09       | 0.7976 | 0.8291  | 0.07                | 0.4461 | 0.8474  | 0.20       | 0.3468     | 0.4180  | 0.30       |        |                     |            |        |         |                     |        |  |  |                     |  |  |  |
| 2430         | LIM and SH3 domain protein 1                                    | Q14847 | 0.0061  | 0.0468  | 0.36       | 0.0778 | 0.6125              | 0.31       | 0.0011 | 0.0223  | 0.57                | 0.0013 | 0.0168  | 0.51       | 0.0146              | 0.0861  | 0.31       | 0.0045 | 0.0604              | 0.64       | 0.0652 | 0.2013  | 0.35                | 0.8244 | 1.2702  | 0.02       | 0.4553     | 0.5735  | 0.05       |        |                     |            |        |         |                     |        |  |  |                     |  |  |  |
| 2431         | LIM domain and actin-binding protein 1                          | Q9U1H6 | 0.0005  | 0.0184  | -0.29      | 0.2199 | 0.6607              | -0.16      | 0.0034 | 0.0311  | -0.30               | 0.2213 | 0.7591  | 0.02       | 0.0914              | 0.7541  | 0.01       | 0.0097 | 0.0701              | 0.17       | 0.3736 | 0.6150  | -2.55               | 0.8708 | 1.2389  | -0.33      | 0.0651     | 0.2019  | 2.06       |        |                     |            |        |         |                     |        |  |  |                     |  |  |  |
| 2432         | LIM domain kinase 1                                             | P53667 | 0.4108  | 0.5568  | -3.31      | 0.5752 | 0.7794              | -1.75      | 0.5661 | 0.7032  | -1.19               | 0.5388 | 0.6650  | 0.89       | 0.2938              | 0.4533  | -1.88      | 0.9510 | 1.0695              | 0.09       | 0.0226 | 0.1363  | -0.20               | 0.2620 | 0.5808  | 0.06       | 0.6031     | 0.6634  | 0.02       |        |                     |            |        |         |                     |        |  |  |                     |  |  |  |
| 2433         | LIM domain kinase 2                                             | P53671 | 0.0128  | 0.0663  | -0.33      | 0.5164 | 0.8391              | -0.14      | 0.1345 | 0.2571  | -0.15               | 0.5414 | 0.5929  | -0.03      | 0.0552              | 0.1754  | -0.09      | 0.2484 | 0.4369              | -0.25      | 0.3736 | 0.4904  | -2.55               | 0.8708 | 1.0159  | -0.33      | 0.0651     | 0.1366  | 2.06       |        |                     |            |        |         |                     |        |  |  |                     |  |  |  |
| 2434         | LIM domain only protein 7                                       | Q8RWI1 | 0.4315  | 0.5090  | -0.01      | 0.2440 | 0.6576              | 0.13       | 0.0001 | 0.0152  | 0.16                | 0.0044 | 0.0270  | 0.15       | 0.0455              | 0.1573  | -0.12      | 0.0610 | 0.1714              | 0.23       | 0.5247 | 0.5777  | -0.09               | 0.0057 | 0.0605  | -0.28      | 0.1151     | 0.1728  | -0.06      |        |                     |            |        |         |                     |        |  |  |                     |  |  |  |
| 2435         | LIM/homeobox protein Lhx4                                       | Q969G2 | 0.0486  | 0.1415  | -0.24      | 0.3485 | 0.7041              | -0.06      | 0.0236 | 0.0755  | 0.27                | 0.7713 | 0.8032  | -0.02      | 0.4119              | 0.5069  | -0.05      | 0.2079 | 0.3878              | -0.09      | 0.3736 | 0.5010  | -2.55               | 0.8708 | 1.0353  | -0.33      | 0.0651     | 0.1413  | 2.06       |        |                     |            |        |         |                     |        |  |  |                     |  |  |  |
| 2436         | Limbin                                                          | Q86UK5 | 0.4108  | 0.5566  | -3.31      | 0.5752 | 0.7792              | -1.75      | 0.5661 | 0.7030  | -1.19               | 0.5388 | 0.6648  | 0.89       | 0.2938              | 0.4532  | -1.88      | 0.9510 | 1.0693              | 0.09       | 0.0004 | 0.0351  | 0.84                | 0.0007 | 0.0261  | 0.87       | 0.0060     | 0.0738  | 0.97       |        |                     |            |        |         |                     |        |  |  |                     |  |  |  |
| 2437         | LINE-1 retrotransposon element ORF1 protein                     | Q9UN81 | 0.7812  | 0.8221  | -0.01      | 0.3531 | 0.7051              | 0.17       | 0.0220 | 0.0723  | 0.19                | 0.1041 | 0.1996  | 0.10       | 0.5392              | 0.6236  | -0.02      | 0.8708 | 1.1064              | -0.01      | 0.6526 | 0.6971  | -0.06               | 0.8468 | 1.2890  | 0.02       | 0.9584     | 0.9666  | -0.01      |        |                     |            |        |         |                     |        |  |  |                     |  |  |  |
| 2438         | LINE-1 type transposase domain-containing protein 1             | Q5T7N2 | 0.0417  | 0.1293  | 0.13       | 0.3101 | 0.6795              | 0.08       | 0.0079 | 0.0418  | 0.30                | 0.0125 | 0.0452  | 0.21       | 0.0389              | 0.1442  | 0.15       | 0.0064 | 0.0624              | 0.27       | 0.4079 | 0.4638  | 0.09                | 0.0871 | 0.2928  | -0.14      | 0.4342     | 0.5051  | -0.05      |        |                     |            |        |         |                     |        |  |  |                     |  |  |  |
| 2439         | Lipid droplet-associated hydrolase                              | Q9H6V9 | 0.7306  | 0.7808  | 0.01       | 0.3574 | 0.7085              | 0.17       | 0.1082 | 0.2173  | 0.18                | 0.5907 | 0.6393  | 0.07       | 0.1406              | 0.3130  | 0.09       | 0.0468 | 0.1438              | -0.13      | 0.3736 | 0.5634  | -2.55               | 0.8708 | 1.1481  | -0.33      | 0.0651     | 0.1722  | 2.06       |        |                     |            |        |         |                     |        |  |  |                     |  |  |  |
| 2440         | Lipocalin-15                                                    | Q6UWW0 | 0.4108  | 0.5565  | -3.31      | 0.5752 | 0.7790              | -1.75      | 0.5661 | 0.7029  | -1.19               | 0.5388 | 0.6647  | 0.89       | 0.2938              | 0.4531  | -1.88      | 0.9510 | 1.0690              | 0.09       | 0.3585 | 0.6362  | -0.26               | 0.3315 | 0.6882  | -0.10      | 0.0841     | 0.1359  | 0.22       |        |                     |            |        |         |                     |        |  |  |                     |  |  |  |
| 2441         | Lipocalin-2                                                     | Q86X29 | 0.1685  | 0.3269  | 0.12       | 0.4770 | 0.8035              | 0.11       | 0.0249 | 0.0783  | 0.26                | 0.0069 | 0.0335  | 0.39       | 0.6128              | 0.6869  | 0.03       | 0.0279 | 0.1068              | 0.33       | 0.3151 | 0.5770  | 0.08                | 0.1155 | 0.3489  | -0.06      | 0.5175     | 0.5838  | -0.02      |        |                     |            |        |         |                     |        |  |  |                     |  |  |  |
| 2442         | Lipoma-preferred partner                                        | Q93052 | 0.0010  | 0.0221  | -0.31      | 0.6863 | 0.7708              | 0.06       | 0.0471 | 0.1202  | -0.08               | 0.0003 | 0.0104  | 0.10       | 0.0005              | 0.0195  | 0.13       | 0.1070 | 0.2451              | 0.06       | 0.0118 | 0.1038  | -0.18               | 0.0503 | 0.2111  | -0.14      | 0.0488     | 0.1931  | -0.10      |        |                     |            |        |         |                     |        |  |  |                     |  |  |  |
| 2443         | Lipopolysaccharide-responsive and beige-like anchor protein     | P50851 | 0.0648  | 0.1683  | 0.10       | 0.1113 | 0.6308              | 0.23       | 0.0272 | 0.0827  | 0.17                | 0.0023 | 0.0204  | 0.30       | 0.0070              | 0.0608  | 0.27       | 0.1003 | 0.0704              | 0.21       | 0.3736 | 0.6120  | -2.55               | 0.8708 | 1.2338  | -0.33      | 0.0651     | 0.2001  | 2.06       |        |                     |            |        |         |                     |        |  |  |                     |  |  |  |
| 2444         | Liprin-alpha-1                                                  | Q13136 | 0.0049  | 0.0432  | 0.22       | 0.0774 | 0.6121              | 0.23       | 0.0583 | 0.1388  | 0.22                | 0.0001 | 0.0069  | 0.28       | 0.0112              | 0.0757  | 0.13       | 0.0003 | 0.0379              | 0.24       | 0.0050 | 0.0749  | 0.71                | 0.0142 | 0.0997  | 0.58       | 0.0161     | 0.1087  | 0.85       |        |                     |            |        |         |                     |        |  |  |                     |  |  |  |
| 2445         | Liprin-alpha-3                                                  | Q75145 | 0.0784  | 0.1919  | 0.12       | 0.2276 | 0.6605              | 0.23       | 0.0043 | 0.0323  | 0.33                | 0.0050 | 0.0285  | 0.35       | 0.0926              | 0.2401  | 0.13       | 0.0081 | 0.0666              | 0.40       | 0.0086 | 0.0938  | 0.35                | 0.0025 | 0.0414  | 0.23       | 0.0281     | 0.1433  | 0.35       |        |                     |            |        |         |                     |        |  |  |                     |  |  |  |
| 2446         | Liprin-beta-1                                                   | Q86W92 | 0.0000  | 0.0000  | -0.33      | 0.1953 | 0.6682              | -0.21      | 0.0054 | 0.0359  | -0.12               | 0.0054 | 0.0295  | -0.27      | 0.0066              | 0.0815  | -0.02      | 0.0009 | 0.0436              | -0.20      | 0.0454 | 0.1710  | -0.22               | 0.0070 | 0.0687  | -0.39      | 0.2481     | 0.3190  | -0.18      |        |                     |            |        |         |                     |        |  |  |                     |  |  |  |
| 2447         | L-lactate dehydrogenase A chain                                 | P00338 | 0.0035  | 0.0382  | 0.46       | 0.1143 | 0.6326              | 0.49       | 0.0020 | 0.0251  | 0.56                | 0.0016 | 0.0179  | 0.58       | 0.0418              | 0.1512  | 0.23       | 0.0127 | 0.0759              | 0.48       | 0.0670 | 0.2034  | 0.39                | 0.1945 | 0.4893  | 0.17       | 0.9881     | 0.9906  | 0.00       |        |                     |            |        |         |                     |        |  |  |                     |  |  |  |
| 2448         | L-lactate dehydrogenase B chain                                 | P07195 | 0.0068  | 0.0491  | -0.22      | 0.1780 | 0.6633              | -0.18      | 0.0639 | 0.1473  | -0.26               | 0.0266 | 0.0735  | -0.16      | 0.0000              | 0.0000  | -0.35      | 0.0020 | 0.0537              | -0.15      | 0.0857 | 0.2341  | 0.41                | 0.5562 | 0.9820  | 0.07       | 0.2489     | 0.3198  | -0.12      |        |                     |            |        |         |                     |        |  |  |                     |  |  |  |
| 2449         | L-lactate dehydrogenase C chain                                 | P07864 | 0.1453  | 0.2930  | -0.22      | 0.0820 | 0.6156              | -0.27      | 0.1410 | 0.2665  | -0.21               | 0.1499 | 0.2651  | -0.21      | 0.5123              | 0.6015  | -0.08      | 0.0601 | 0.8975              | -0.08      | 0.3406 | 0.6111  | -0.11               | 0.0666 | 0.2489  | 0.16       | 0.7549     | 0.7980  | 0.03       |        |                     |            |        |         |                     |        |  |  |                     |  |  |  |
| 2450         | LON peptidase N-terminal domain and RING finger protein 2       | Q1L5Z9 | 0.2574  | 0.4458  | 0.04       | 0.2063 | 0.6601              | -0.06      | 0.0213 | 0.0706  | 0.14                | 0.1656 | 0.2857  | -0.07      | 0.0332              | 0.1329  | -0.12      | 0.0188 | 0.0887              | 0.18       | 0.3736 | 0.5955  | -2.55               | 0.8708 | 1.2048  | -0.33      | 0.0651     | 0.1902  | 2.06       |        |                     |            |        |         |                     |        |  |  |                     |  |  |  |
| 2451         | Lon protease homolog mitochondrial                              | P36776 | 0.0052  | 0.0442  | 0.29       | 0.1411 | 0.6532              | 0.38       | 0.0025 | 0.0277  | 0.46                | 0.0061 | 0.0314  | 0.40       | 0.1812              | 0.3737  | 0.08       | 0.0065 | 0.0622              | 0.36       | 0.3736 | 0.6231  | -2.55               | 0.8708 | 1.2530  | -0.33      | 0.0651     | 0.2070  | 2.06       |        |                     |            |        |         |                     |        |  |  |                     |  |  |  |
| 2452         | Long-chain fatty acid transport protein 4                       | Q6P1M0 | 0.0006  | 0.0195  | -2.09      | 0.1829 | 0.6649              | -1.08      | 0.0130 | 0.0534  | -1.15               | 0.0060 | 0.0311  | -1.74      | 0.6523              | 0.7195  | -0.05      | 0.0006 | 0.0393              | -0.27      | 0.3736 | 0.6514  | -2.55               | 0.8708 | 1.3018  | -0.33      | 0.0651     | 0.2257  | 2.06       |        |                     |            |        |         |                     |        |  |  |                     |  |  |  |
| 2453         | Long-chain-fatty-acid-CoA ligase 3                              | Q95Y73 | 0.3292  | 0.5359  | 0.05       | 0.2522 | 0.6621              | 0.16       | 0.0038 | 0.0249  | 0.36                | 0.0038 | 0.0249  | 0.36       | 0.0251              | 0.1143  | 0.24       | 0.0029 | 0.0548              | 0.74       | 0.0305 | 0.1478  | 0.38                | 0.0426 | 0.1904  | 0.12       | 0.1223     | 0.0957  | 0.12       |        |                     |            |        |         |                     |        |  |  |                     |  |  |  |
| 2454         | Long-chain-fatty-acid-CoA ligase 4                              | Q60488 | 0.0454  | 0.1359  | 0.19       | 0.6641 | 0.7524              | 0.62       | 0.2297 | 0.3892  | 0.14                | 0.4176 | 0.6097  | -0.04      | 0.0221              | 0.1073  | -0.21      | 0.1369 | 0.2896              | 0.09       | 0.0207 | 0.1325  | 0.26                | 0.5768 | 1.0070  | -0.03      | 0.0988     | 0.1542  | 0.16       |        |                     |            |        |         |                     |        |  |  |                     |  |  |  |
| 2455         | Low affinity immunoglobulin epsilon Fc receptor                 | P06734 | 0.8672  | 0.8948  | 0.02       | 0.2086 | 0.6601              | -0.18      | 0.6657 | 0.7169  | 0.05                | 0.0884 | 0.1770  | -0.28      | 0.2122              | 0.4159  | -0.20      | 0.5961 | 0.8323              | -0.08      | 0.3736 | 0.4528  | -2.55               | 0.8708 | 0.9460  | -0.33      | 0.0651     | 0.1206  | 2.06       |        |                     |            |        |         |                     |        |  |  |                     |  |  |  |
| 2456         | Low molecular weight phosphotyrosine protein phosphatase        | P24666 | 0.4490  | 0.5267  | -0.06      | 0.5313 | 0.8507              | -0.08      | 0.0755 | 0.1652  | -0.19               | 0.1540 | 0.2705  | -0.14      | 0.1154              | 0.2782  | -0.16      | 0.0419 | 0.8785              | 0.03       | 0.3736 | 0.4483  | -2.55               | 0.8708 | 0.9376  | -0.33      | 0.0651     | 0.1188  | 2.06       |        |                     |            |        |         |                     |        |  |  |                     |  |  |  |
| 2457         | Low-density lipoprotein receptor-related protein 1B             | Q9NZR2 | 0.4108  | 0.5563  | -3.31      | 0.5752 | 0.7788              | -1.75      | 0.5661 | 0.7027  | -1.19               | 0.5388 | 0.6645  | 0.89       | 0.2938              | 0.4529  | -1.88      | 0.9510 | 1.0688              |            |        |         |                     |        |         |            |            |         |            |        |                     |            |        |         |                     |        |  |  |                     |  |  |  |

Supplementary Table S2. Overview on all relatively quantified 5180 proteins statistical analysis

| Protein name                                                             | UniProt | MCF-7               |            |                     |         | MDA-MB-231          |        |                     |            |
|--------------------------------------------------------------------------|---------|---------------------|------------|---------------------|---------|---------------------|--------|---------------------|------------|
|                                                                          |         | Dai SC20 vs control |            | Gen SC20 vs control |         | Dai IC20 vs control |        | Gen IC20 vs control |            |
|                                                                          |         | p value             | BH q value | log2FC              | p value | BH q value          | log2FC | p value             | BH q value |
| 2504 Malate dehydrogenase_mitochondrial                                  | P40926  | 0.0015              | 0.0263     | 0.53                | 0.1724  | 0.6615              | 0.25   | 0.0223              | 0.0731     |
| 2505 Malactin                                                            | Q14165  | 0.7477              | 0.7946     | 0.01                | 0.2140  | 0.6626              | 0.11   | 0.0470              | 0.1202     |
| 2506 Malignant T-cell-amplified sequence 1                               | Q9ULC4  | 0.5097              | 0.5825     | -0.06               | 0.8166  | 0.8689              | 0.03   | 0.2739              | 0.4476     |
| 2507 Malonyl-CoA decarboxylase_mitochondrial                             | P59322  | 0.5309              | 0.6018     | 0.09                | 0.0369  | 0.5493              | 0.33   | 0.5642              | 0.7884     |
| 2508 Malase-glucosylase_intestinal                                       | Q42451  | 0.4108              | 0.5550     | -3.31               | 0.5752  | 0.7769              | -1.75  | 0.5661              | 0.7012     |
| 2509 Mannan-binding lectin serine protease 1                             | P48740  | 0.2605              | 0.4496     | -0.10               | 0.3836  | 0.7305              | -0.23  | 0.5925              | 0.6487     |
| 2510 Mannan-1-phosphate guanyltransferase beta                           | Q9Y5P6  | 0.0988              | 0.2234     | 0.12                | 0.8766  | 0.9113              | 0.02   | 0.0863              | 0.1831     |
| 2511 Mannose-6-phosphate isomerase                                       | P34949  | 0.0055              | 0.0449     | -0.13               | 0.6040  | 0.7072              | 0.02   | 0.1259              | 0.2454     |
| 2512 Mannosyl-oligosaccharide 1-2-alpha-mannosidase IB                   | O60476  | 0.2568              | 0.4449     | 0.06                | 0.1529  | 0.6584              | 0.27   | 0.0078              | 0.0417     |
| 2513 Mannosyl-oligosaccharide glucosidase                                | Q13724  | 0.4795              | 0.5543     | -0.17               | 0.6876  | 0.7716              | 0.06   | 0.8267              | 0.8602     |
| 2514 MAP kinase-activated protein kinase 2                               | P49137  | 0.9898              | 0.9921     | 0.00                | 0.5587  | 0.8720              | 0.04   | 0.2107              | 0.3651     |
| 2515 MAP/microtubule affinity-regulating kinase 3                        | P27448  | 0.0965              | 0.2192     | 0.22                | 0.1985  | 0.6651              | 0.24   | 0.0621              | 0.1448     |
| 2516 MAP7 domain-containing protein 1                                    | Q3KQU3  | 0.0326              | 0.1125     | -1.06               | 0.0216  | 0.4782              | -0.62  | 0.1561              | 0.2885     |
| 2517 MARCKS-related protein                                              | P49006  | 0.6069              | 0.6716     | -0.02               | 0.1242  | 0.6408              | 0.20   | 0.1518              | 0.2823     |
| 2518 Matrin-3                                                            | P43243  | 0.1011              | 0.2268     | 0.14                | 0.7910  | 0.8497              | 0.03   | 0.9389              | 0.9529     |
| 2519 Matrix metalloproteinase-15                                         | P51511  | 0.0440              | 0.1333     | 0.21                | 0.0346  | 0.5318              | 0.24   | 0.7003              | 0.7475     |
| 2520 Matrix metalloproteinase-21                                         | Q8N119  | 0.4108              | 0.5549     | -3.31               | 0.5752  | 0.7767              | -1.75  | 0.5661              | 0.7010     |
| 2521 Matrix-remodeling-associated protein 5                              | Q9NR89  | 0.0351              | 0.1169     | 0.23                | 0.2985  | 0.6729              | 0.12   | 0.0571              | 0.1367     |
| 2522 MBT domain-containing protein 1                                     | O05BQ5  | 0.0551              | 0.1536     | -12.77              | 0.0452  | 0.5642              | -11.21 | 0.3827              | 0.5836     |
| 2523 Mdm2-binding protein                                                | Q96DY7  | 0.0359              | 0.1184     | -3.37               | 0.0340  | 0.5289              | -0.62  | 0.0082              | 0.0427     |
| 2524 Mediator of DNA damage checkpoint protein 1                         | Q14676  | 0.0122              | 0.0640     | -0.17               | 0.1098  | 0.6327              | -0.09  | 0.4433              | 0.1131     |
| 2525 Mediator of RNA polymerase II transcription subunit 20              | Q9J944  | 0.4108              | 0.5547     | -3.31               | 0.5752  | 0.7765              | -1.75  | 0.5661              | 0.7009     |
| 2526 Mediator of RNA polymerase II transcription subunit 23              | Q9ULK4  | 0.0128              | 0.0662     | -0.23               | 0.0205  | 0.4720              | -0.54  | 0.0731              | 0.1619     |
| 2527 Mediator of RNA polymerase II transcription subunit 24              | Q75448  | 0.9054              | 0.9263     | 0.01                | 0.9787  | 0.9855              | 0.00   | 0.0128              | 0.0129     |
| 2528 Medium-chain specific acyl-CoA dehydrogenase_mitochondrial          | P11310  | 0.4108              | 0.5546     | -3.31               | 0.5752  | 0.7763              | -1.75  | 0.5661              | 0.7007     |
| 2529 Mesakarovoc-associated tyrosine-protein kinase                      | P42679  | 0.4108              | 0.5544     | -3.31               | 0.5752  | 0.7761              | -1.75  | 0.5661              | 0.7005     |
| 2530 Meskine-specific coiled-coil domain-containing protein MEIOC        | AZURB1  | 0.0647              | 0.1682     | -1.22               | 0.5846  | 0.6965              | -0.54  | 0.2466              | 0.4163     |
| 2531 Meiosis-specific nuclear structural protein 1                       | Q8NEH6  | 0.5567              | 0.6255     | 0.05                | 0.2045  | 0.6596              | 0.24   | 0.0499              | 0.1249     |
| 2532 Melanoma inhibitory activity protein 2                              | Q96PC5  | 0.5563              | 0.6252     | 0.03                | 0.6888  | 0.7321              | -0.04  | 0.0427              | 0.1120     |
| 2533 Melanoma-associated antigen B18                                     | Q96M61  | 0.1104              | 0.2412     | 0.21                | 0.0045  | 0.5522              | 0.44   | 0.5986              | 0.6546     |
| 2534 Melanoma-associated antigen D1                                      | Q9Y5V3  | 0.8173              | 0.8529     | -0.01               | 0.1761  | 0.6615              | 0.27   | 0.5157              | 0.7361     |
| 2535 Melanoma-associated antigen D2                                      | Q9UNF1  | 0.3727              | 0.5875     | 0.02                | 0.0663  | 0.6300              | 0.17   | 0.0036              | 0.0318     |
| 2536 Melanophilin                                                        | Q9BV36  | 0.5194              | 0.5913     | 0.10                | 0.2555  | 0.6627              | 0.21   | 0.4041              | 0.6087     |
| 2537 Melanoregulin                                                       | Q8NS65  | 0.0649              | 0.1685     | -0.24               | 0.0667  | 0.5937              | -0.27  | 0.0349              | 0.0971     |
| 2538 Membrane magnesium transporter 1                                    | Q8N4V1  | 0.0034              | 0.0382     | -0.24               | 0.0181  | 0.4688              | -0.29  | 0.0042              | 0.0326     |
| 2539 Membrane-associated progesterone receptor component 1               | O00264  | 0.1602              | 0.3149     | -0.08               | 0.0738  | 0.6117              | 0.27   | 0.0009              | 0.0217     |
| 2540 Membrane-associated progesterone receptor component 2               | O15173  | 0.3470              | 0.5560     | 0.05                | 0.1452  | 0.6569              | 0.16   | 0.1807              | 0.3244     |
| 2541 Merlin                                                              | P35240  | 0.0907              | 0.2108     | -1.21               | 0.4319  | 0.7680              | -0.61  | 0.4045              | 0.6091     |
| 2542 Mesencephalic astrocyte-derived neurotrophic factor                 | P55145  | 0.1732              | 0.3345     | 0.08                | 0.2085  | 0.6066              | 0.17   | 0.2943              | 0.4749     |
| 2543 Metabotropic glutamate receptor 1                                   | Q13255  | 0.4108              | 0.5543     | -3.31               | 0.5752  | 0.7759              | -1.75  | 0.5661              | 0.7004     |
| 2544 Metallothionein-1E                                                  | P04732  | 0.4108              | 0.5542     | -3.31               | 0.5752  | 0.7757              | -1.75  | 0.5661              | 0.7002     |
| 2545 Metallothionein-1F                                                  | P04733  | 0.4108              | 0.5540     | -3.31               | 0.5752  | 0.7755              | -1.75  | 0.5661              | 0.7000     |
| 2546 Metallothionein-1M                                                  | Q8N139  | 0.0337              | 0.1146     | 0.18                | 0.5308  | 0.8248              | -1.91  | 0.7232              | 0.7675     |
| 2547 Metallothionein-1X                                                  | P08297  | 0.4108              | 0.5539     | -3.31               | 0.5752  | 0.7753              | -1.75  | 0.5661              | 0.6999     |
| 2548 Metallothionein-2                                                   | P02795  | 0.4108              | 0.5537     | -3.31               | 0.5752  | 0.7751              | -1.75  | 0.5661              | 0.6997     |
| 2549 Metal-response element-binding transcription factor 2               | Q9Y483  | 0.0943              | 0.2164     | 0.08                | 0.3766  | 0.7239              | 0.06   | 0.8368              | 0.8685     |
| 2550 Metastasis-associated protein MTA1                                  | Q13330  | 0.0528              | 0.1490     | -1.85               | 0.1516  | 0.6599              | -1.39  | 0.3615              | 0.5591     |
| 2551 Metastasis-associated protein MTA2                                  | Q94776  | 0.0013              | 0.0248     | 0.19                | 0.0673  | 0.5909              | 0.33   | 0.0231              | 0.0749     |
| 2552 Metastasis-associated protein MTA3                                  | Q9BTC8  | 0.0001              | 0.0110     | -0.95               | 0.1411  | 0.6538              | 0.26   | 0.0004              | 0.0197     |
| 2553 Metaxin-1                                                           | Q13505  | 0.0612              | 0.1637     | 0.25                | 0.4755  | 0.8026              | 0.15   | 0.7227              | 0.8130     |
| 2554 Metaxin-2                                                           | Q75431  | 0.4108              | 0.5536     | -3.31               | 0.5752  | 0.7749              | -1.75  | 0.5661              | 0.6995     |
| 2555 Methanethiol oxidase                                                | Q13228  | 0.0044              | 0.0418     | 0.25                | 0.2017  | 0.6600              | 0.15   | 0.3961              | 0.5987     |
| 2556 Methionine adenosyltransferase 2 subunit beta                       | Q9NZL9  | 0.0036              | 0.0384     | 0.22                | 0.0409  | 0.7509              | 0.11   | 0.0043              | 0.0322     |
| 2557 Methionine aminopeptidase 1                                         | P35382  | 0.5462              | 0.6157     | -0.06               | 0.4435  | 0.7793              | -0.05  | 0.0600              | 0.1417     |
| 2558 Methionine aminopeptidase 2                                         | P50579  | 0.4975              | 0.5715     | 0.06                | 0.0495  | 0.5736              | 0.36   | 0.0369              | 0.1008     |
| 2559 Methionine synthase reductase                                       | Q9UBK8  | 0.0480              | 0.1409     | -0.20               | 0.2524  | 0.6623              | 0.21   | 0.6893              | 0.7380     |
| 2560 Methionine-tRNA ligase_cytoplasmic                                  | P56192  | 0.0016              | 0.0273     | 0.33                | 0.2120  | 0.6627              | 0.19   | 0.0016              | 0.0233     |
| 2561 Methionyl-tRNA formyltransferase_mitochondrial                      | Q96DP5  | 0.4108              | 0.5534     | -3.31               | 0.5752  | 0.7747              | -1.75  | 0.5661              | 0.6994     |
| 2562 Methylated-DNA-protein-cysteine methyltransferase                   | P16455  | 0.5088              | 0.5818     | -0.06               | 0.8362  | 0.8818              | 0.02   | 0.3223              | 0.5098     |
| 2563 Methyl-CpG-binding domain protein 4                                 | Q9Y5243 | 0.4108              | 0.5533     | -3.31               | 0.5752  | 0.7745              | -1.75  | 0.5661              | 0.6992     |
| 2564 Methyl-CpG-binding domain protein 5                                 | Q9P267  | 0.0665              | 0.1709     | -0.07               | 0.2371  | 0.6624              | -0.10  | 0.0488              | 0.1229     |
| 2565 Methylcrotonyl-CoA carboxylase beta chain_mitochondrial             | Q9HCC0  | 0.1732              | 0.3344     | -0.09               | 0.4318  | 0.7526              | 0.14   | 0.1617              | 0.2968     |
| 2566 Methylcrotonyl-CoA carboxylase subunit alpha_mitochondrial          | Q96RQ3  | 0.0168              | 0.0759     | 0.12                | 0.1397  | 0.6537              | 0.21   | 0.0948              | 0.1959     |
| 2567 Methylcrotonyl-CoA carboxylase subunit beta_mitochondrial           | Q6N021  | 0.0265              | 0.0985     | -0.13               | 0.3317  | 0.6912              | -0.12  | 0.4398              | 0.6513     |
| 2568 Methylmalonate-semialdehyde dehydrogenase [acylating]_mitochondrial | Q02252  | 0.2055              | 0.3780     | -0.05               | 0.3411  | 0.7000              | 0.16   | 0.3021              | 0.4849     |
| 2569 Methylmalonyl-CoA mutase_mitochondrial                              | P22033  | 0.0466              | 0.1381     | 0.10                | 0.0916  | 0.6293              | 0.20   | 0.0333              | 0.0944     |
| 2570 Methylmalonate protein 50                                           | Q9BQA1  | 0.2800              | 0.4735     | 0.23                | 0.8806  | 0.9143              | -0.10  | 0.5326              | 0.7536     |
| 2571 Methylmalonate protein pLcn                                         | P54105  | 0.9569              | 0.9677     | 0.00                | 0.5051  | 0.5742              | -0.23  | 0.0557              | 0.1349     |
| 2572 Methylsterol monooxygenase 1                                        | Q15800  | 0.0054              | 0.0445     | 0.25                | 0.0093  | 0.4420              | 0.33   | 0.0003              | 0.0232     |
| 2573 Methylthioribose-1-phosphate isomerase                              | Q9BV20  | 0.1647              | 0.3218     | 0.09                | 0.9720  | 0.9811              | 0.00   | 0.0985              | 0.2018     |
| 2574 Methylthioribose-1-phosphate dehydratase                            | Q96GX9  | 0.0426              | 0.1307     | 0.19                | 0.0339  | 0.5305              | 0.28   | 0.0325              | 0.0928     |
| 2575 Methyltransferase-like protein 2A                                   | Q96Z16  | 0.4108              | 0.5531     | -3.31               | 0.5752  | 0.7743              | -1.75  | 0.5661              | 0.6990     |
| 2576 Methyltransferase-like protein 2B                                   | Q6P1Q9  | 0.4567              | 0.5338     | -0.03               | 0.0546  | 0.5668              | -0.10  | 0.0669              | 0.1522     |
| 2577 MHC class I polypeptide-related sequence B                          | Q29980  | 0.4108              | 0.5530     | -3.31               | 0.5752  | 0.7741              | -1.75  | 0.5661              | 0.6989     |
| 2578 MICOS complex subunit MIC19                                         | Q9NX63  | 0.3102              | 0.5114     | 0.05                | 0.9659  | 0.9766              | -0.01  | 0.0702              | 0.1575     |
| 2579 MICOS complex subunit MIC60                                         | Q16891  | 0.0221              | 0.0886     | 0.24                | 0.4040  | 0.7479              | 0.19   | 0.0078              | 0.0416     |

Supplementary Table S2. Overview on all relatively quantified 5180 proteins statistical analysis

| Protein name                                                        | UniProt | MCF-7                     |                           |                           | MDA-MB-231                |                           |                           |
|---------------------------------------------------------------------|---------|---------------------------|---------------------------|---------------------------|---------------------------|---------------------------|---------------------------|
|                                                                     |         | Dai SC20 vs control       | Gen SC20 vs control       | SSE SC20 vs control       | Dai IC20 vs control       | Gen IC20 vs control       | SSE IC20 vs control       |
|                                                                     |         | p value BH q value log2FC |
| 2580 Microtubule-associated protein 1                               | P55081  | 0.0082                    | 0.0537                    | 0.43                      | 0.0014                    | 0.2133                    | 0.45                      |
| 2581 Microtubule-associated protein 3-like                          | U7121   | 0.0129                    | 0.0664                    | -0.26                     | 0.0015                    | 0.4784                    | 0.33                      |
| 2582 Microprocessor complex subunit DCCR8                           | Q8WYQ5  | 0.0084                    | 0.0543                    | -0.47                     | 0.2086                    | 0.6605                    | -0.16                     |
| 2583 Microsomal glutathione S-transferase 3                         | I14880  | 0.1963                    | 0.3651                    | -0.21                     | 0.0056                    | 0.3817                    | -1.05                     |
| 2584 Microtubule cross-linking factor 1                             | Q9Y4B5  | 0.4108                    | 0.5529                    | -3.31                     | 0.5752                    | 0.7739                    | -1.75                     |
| 2585 Microtubule-actin cross-linking factor 1 isoforms 1/2/3/5      | Q9UPN3  | 0.1721                    | 0.3331                    | -0.10                     | 0.7443                    | 0.8146                    | 0.06                      |
| 2586 Microtubule-associated protein 1A                              | P78559  | 0.0273                    | 0.1002                    | -0.75                     | 0.0620                    | 0.5915                    | -0.83                     |
| 2587 Microtubule-associated protein 1B                              | P46821  | 0.0016                    | 0.0272                    | -0.89                     | 0.4692                    | 0.7990                    | -0.08                     |
| 2588 Microtubule-associated protein 2                               | P11137  | 0.4108                    | 0.5527                    | -3.31                     | 0.5752                    | 0.7737                    | -1.75                     |
| 2589 Microtubule-associated protein 4                               | P27816  | 0.1854                    | 0.3500                    | 0.10                      | 0.3537                    | 0.7055                    | 0.11                      |
| 2590 Microtubule-associated protein 9                               | Q49MG5  | 0.4108                    | 0.5526                    | -3.31                     | 0.5752                    | 0.7735                    | -1.75                     |
| 2591 Microtubule-associated protein RP/EB family member 1           | Q15691  | 0.4790                    | 0.5538                    | 0.05                      | 0.4215                    | 0.7592                    | 0.14                      |
| 2592 Microtubule-associated protein RP/EB family member 3           | Q9UPY8  | 0.0181                    | 0.0789                    | 0.39                      | 0.4537                    | 0.7871                    | 0.12                      |
| 2593 Microtubule-associated protein tau                             | P10636  | 0.2355                    | 0.4186                    | -0.07                     | 0.1374                    | 0.6512                    | 0.41                      |
| 2594 Microtubule-associated proteins 1A/1B light chain 3A           | Q9H492  | 0.5658                    | 0.6337                    | 0.03                      | 0.1531                    | 0.6504                    | 0.30                      |
| 2595 Microtubule-associated serine/threonine-protein kinase 4       | O15021  | 0.5341                    | 0.6046                    | -0.01                     | 0.0793                    | 0.6140                    | 0.11                      |
| 2596 Microtubule-associated tumor suppressor candidate 2            | Q5JR59  | 0.1963                    | 0.3650                    | 0.03                      | 0.7442                    | 0.8148                    | 0.04                      |
| 2597 Midline                                                        | P21741  | 0.7082                    | 0.7603                    | -0.02                     | 0.4595                    | 0.7910                    | 0.07                      |
| 2598 MIF4G domain-containing protein                                | A0U1W6  | 0.7852                    | 0.8255                    | -0.02                     | 0.5749                    | 0.8860                    | -0.03                     |
| 2599 Mini-chromosome maintenance complex-binding protein            | Q9BTB3  | 0.4582                    | 0.5350                    | 0.03                      | 0.0796                    | 0.6118                    | 0.08                      |
| 2600 Minor histocompatibility antigen H13                           | Q8TC79  | 0.0166                    | 0.0752                    | 0.39                      | 0.0243                    | 0.4841                    | 0.54                      |
| 2601 Mirror-image polydactyl gene 1 protein                         | Q8TD10  | 0.6078                    | 0.6724                    | 0.02                      | 0.2169                    | 0.6597                    | -0.24                     |
| 2602 Misl 8-binding protein 1                                       | Q6P0N0  | 0.4108                    | 0.5524                    | -3.31                     | 0.5752                    | 0.7733                    | -1.75                     |
| 2603 Mitochondrial repair endonuclease PMS2                         | P54278  | 0.0300                    | 0.1064                    | -0.22                     | 0.4760                    | 0.8026                    | -0.05                     |
| 2604 Missapen-like kinase 1                                         | Q8N4C8  | 0.4108                    | 0.5523                    | -3.31                     | 0.5752                    | 0.7731                    | -1.75                     |
| 2605 Mitochondrial 2-oxoglutarate/malate carrier protein            | Q02978  | 0.4540                    | 0.5315                    | -0.04                     | 0.2662                    | 0.6626                    | 0.21                      |
| 2606 Mitochondrial antiviral-signaling protein                      | Q7Z434  | 0.0118                    | 0.0628                    | -0.39                     | 0.1044                    | 0.6332                    | -0.31                     |
| 2607 Mitochondrial cardiolipin hydrolase                            | Q8N2A8  | 0.0372                    | 0.1213                    | 0.43                      | 0.0936                    | 0.7615                    | -0.21                     |
| 2608 Mitochondrial carrier homolog 2                                | Q9Y6C9  | 0.0545                    | 0.1527                    | 0.16                      | 0.2404                    | 0.6606                    | 0.22                      |
| 2609 Mitochondrial chaperone BC51                                   | Q9Y276  | 0.4108                    | 0.5521                    | -3.31                     | 0.5752                    | 0.7729                    | -1.75                     |
| 2610 Mitochondrial dicarboxylate carrier                            | Q9UBX3  | 0.9674                    | 0.9761                    | 0.00                      | 0.5008                    | 0.8228                    | 0.11                      |
| 2611 Mitochondrial fission 1 protein                                | Q9Y3D6  | 0.7371                    | 0.7863                    | -0.01                     | 0.2189                    | 0.6596                    | 0.24                      |
| 2612 Mitochondrial fission factor                                   | Q9GZY8  | 0.5393                    | 0.6097                    | -0.06                     | 0.0615                    | 0.5921                    | -0.31                     |
| 2613 Mitochondrial genome maintenance exonuclease 1                 | Q9BOP7  | 0.8185                    | 0.8538                    | 0.01                      | 0.0439                    | 0.5685                    | 0.17                      |
| 2614 Mitochondrial glutamate carrier 1                              | Q9H936  | 0.0652                    | 0.1690                    | -0.10                     | 0.1806                    | 0.6616                    | -0.09                     |
| 2615 Mitochondrial import inner membrane translocase subunit Tim10  | P62072  | 0.4524                    | 0.5299                    | -0.07                     | 0.0589                    | 0.8633                    | -0.02                     |
| 2616 Mitochondrial import inner membrane translocase subunit Tim13  | Q9Y5L4  | 0.0054                    | 0.0445                    | 0.29                      | 0.5627                    | 0.8766                    | 0.06                      |
| 2617 Mitochondrial import inner membrane translocase subunit TIM14  | Q96DA6  | 0.7442                    | 0.7919                    | 0.02                      | 0.1713                    | 0.6612                    | -0.13                     |
| 2618 Mitochondrial import inner membrane translocase subunit Tim23  | O14925  | 0.4108                    | 0.5520                    | -3.31                     | 0.5752                    | 0.7727                    | -1.75                     |
| 2619 Mitochondrial import inner membrane translocase subunit TIM44  | O43615  | 0.0281                    | 0.1019                    | 0.17                      | 0.3424                    | 0.7002                    | 0.23                      |
| 2620 Mitochondrial import inner membrane translocase subunit TIM50  | Q3ZCQ8  | 0.0153                    | 0.0716                    | 0.14                      | 0.3016                    | 0.6751                    | 0.04                      |
| 2621 Mitochondrial import inner membrane translocase subunit Tim8 A | O60220  | 0.6462                    | 0.7078                    | 0.04                      | 0.5984                    | 0.7019                    | -0.06                     |
| 2622 Mitochondrial import inner membrane translocase subunit Tim9   | Q9Y517  | 0.1470                    | 0.2950                    | 0.07                      | 0.4418                    | 0.7776                    | 0.14                      |
| 2623 Mitochondrial import receptor subunit TOM22 homolog            | Q9NS69  | 0.0051                    | 0.0437                    | -0.12                     | 0.8447                    | 0.8884                    | -0.03                     |
| 2624 Mitochondrial import receptor subunit TOM34                    | Q15785  | 0.0248                    | 0.0950                    | 0.16                      | 0.0745                    | 0.6116                    | 0.29                      |
| 2625 Mitochondrial import receptor subunit TOM40 homolog            | Q96008  | 0.0266                    | 0.0988                    | 0.14                      | 0.0842                    | 0.4124                    | -0.29                     |
| 2626 Mitochondrial import receptor subunit TOM7 homolog             | Q9P0U1  | 0.0074                    | 0.0507                    | -0.26                     | 0.0032                    | 0.2858                    | -0.45                     |
| 2627 Mitochondrial import receptor subunit TOM70                    | Q94826  | 0.0038                    | 0.0393                    | 0.18                      | 0.2100                    | 0.6621                    | 0.12                      |
| 2628 Mitochondrial inner membrane protein OXA1L                     | Q15070  | 0.0358                    | 0.1184                    | 0.13                      | 0.1219                    | 0.6385                    | 0.17                      |
| 2629 Mitochondrial ornithine transporter 1                          | Q9Y419  | 0.3746                    | 0.5898                    | -0.11                     | 0.1455                    | 0.6554                    | -0.22                     |
| 2630 Mitochondrial proton/calcium exchanger protein                 | Q95202  | 0.0013                    | 0.0218                    | 0.19                      | 0.0460                    | 0.5607                    | 0.14                      |
| 2631 Mitochondrial Rho GTPase 2                                     | Q8X1I1  | 0.0041                    | 0.0402                    | -0.28                     | 0.9959                    | 0.9974                    | 0.00                      |
| 2632 Mitochondrial ribonuclease P catalytic subunit                 | O15091  | 0.4101                    | 0.6317                    | -0.08                     | 0.4716                    | 0.8004                    | 0.07                      |
| 2633 Mitochondrial tRNA-specific 2-thiouridylase 1                  | Q75648  | 0.4975                    | 0.5714                    | 0.03                      | 0.2979                    | 0.6724                    | -0.12                     |
| 2634 Mitochondrial-processing-peptidase subunit alpha               | Q10713  | 0.0052                    | 0.0441                    | 0.37                      | 0.2480                    | 0.6585                    | 0.27                      |
| 2635 Mitochondrial-processing-peptidase subunit beta                | Q75439  | 0.8213                    | 0.8563                    | -0.01                     | 0.5784                    | 0.6872                    | 0.07                      |
| 2636 Mitogen-activated protein kinase 1                             | P28482  | 0.3478                    | 0.5567                    | 0.13                      | 0.3516                    | 0.7043                    | -0.21                     |
| 2637 Mitogen-activated protein kinase 14                            | Q16539  | 0.0898                    | 0.2096                    | -0.09                     | 0.2437                    | 0.6592                    | 0.17                      |
| 2638 Mitogen-activated protein kinase 3                             | P27361  | 0.2647                    | 0.4563                    | 0.04                      | 0.2570                    | 0.7775                    | 0.04                      |
| 2639 Mitogen-activated protein kinase 9                             | P45984  | 0.0337                    | 0.1145                    | -0.30                     | 0.3071                    | 0.6775                    | -0.24                     |
| 2640 Mitogen-activated protein kinase kinase 1                      | Q13233  | 0.4968                    | 0.5710                    | -0.10                     | 0.9473                    | 0.9652                    | 0.01                      |
| 2641 Mitogen-activated protein kinase kinase kinase 12              | Q12852  | 0.0035                    | 0.0381                    | 0.68                      | 0.1441                    | 0.6548                    | 0.10                      |
| 2642 Mitogen-activated protein kinase kinase kinase 13              | O43283  | 0.0067                    | 0.0491                    | 1.06                      | 0.7960                    | 0.8519                    | 0.17                      |
| 2643 Mitogen-activated protein kinase kinase kinase 15              | Q6ZN16  | 0.0612                    | 0.1637                    | 0.10                      | 0.1590                    | 0.6637                    | 0.07                      |
| 2644 Mitogen-activated protein kinase kinase kinase 2               | Q9Y2U5  | 0.0009                    | 0.0219                    | -0.47                     | 0.6161                    | 0.7162                    | -0.06                     |
| 2645 Mitogen-activated protein kinase kinase kinase 20              | Q9NYL2  | 0.4108                    | 0.5519                    | -3.31                     | 0.5752                    | 0.7725                    | -1.75                     |

Supplementary Table S2. Overview on all relatively quantified 5180 proteins statistical analysis

| Protein name                                                                   | UniProt    | MCF-7               |                     |                     |                     | MDA-MB-231          |                     |                     |                     |            |        |        |       |        |        |       |        |        |       |        |        |       |        |        |       |        |        |       |
|--------------------------------------------------------------------------------|------------|---------------------|---------------------|---------------------|---------------------|---------------------|---------------------|---------------------|---------------------|------------|--------|--------|-------|--------|--------|-------|--------|--------|-------|--------|--------|-------|--------|--------|-------|--------|--------|-------|
|                                                                                |            | Dai SC20 vs control | Gen SC20 vs control | SSE SC20 vs control | Dai IC20 vs control | Gen IC20 vs control | SSE IC20 vs control | Dai IC20 vs control | Gen IC20 vs control |            |        |        |       |        |        |       |        |        |       |        |        |       |        |        |       |        |        |       |
| p value                                                                        | BH q value | log2FC              | p value             | BH q value          | log2FC              | p value             | BH q value          | log2FC              | p value             | BH q value | log2FC |        |       |        |        |       |        |        |       |        |        |       |        |        |       |        |        |       |
| 2646 Mitogen-activated protein kinase kinase kinase 3                          | Q9Y979     | 0.2360              | 0.4192              | -0.05               | 0.3707              | 0.7189              | -0.07               | 0.3474              | 0.5412              | -0.05      | 0.2224 | 0.3623 | -0.05 | 0.1867 | 0.3823 | -0.08 | 0.1189 | 0.2633 | 0.14  | 0.0605 | 0.1948 | 0.35  | 0.0423 | 0.1899 | 0.22  | 0.1732 | 0.2391 | 0.10  |
| 2647 Mitogen-activated protein kinase kinase kinase 4                          | Q9Y6R4     | 0.0625              | 0.1656              | 0.22                | 0.4244              | 0.7607              | 0.02                | 0.0052              | 0.0351              | -0.15      | 0.5975 | 0.6456 | -0.01 | 0.0026 | 0.0390 | -0.11 | 0.8935 | 1.1302 | 0.02  | 0.1767 | 0.3761 | 0.20  | 0.8820 | 0.9110 | 0.02  | 0.4248 | 0.4963 | -0.10 |
| 2648 Mitogen-activated protein kinase kinase kinase 7                          | Q43318     | 0.7344              | 0.7840              | -0.01               | 0.9482              | 0.9653              | 0.00                | 0.4631              | 0.6799              | 0.03       | 0.2827 | 0.4417 | -0.06 | 0.9703 | 0.9771 | 0.00  | 0.3080 | 0.5070 | -0.12 | 0.3736 | 0.4803 | -2.55 | 0.8708 | 0.9973 | -0.33 | 0.0651 | 0.1321 | 2.06  |
| 2649 Mitotic checkpoint protein BUB3                                           | Q43684     | 0.0742              | 0.1847              | 0.13                | 0.3414              | 0.6998              | 0.18                | 0.0675              | 0.1530              | 0.14       | 0.0499 | 0.1149 | -0.16 | 0.2780 | 0.5032 | -0.06 | 0.1352 | 0.2871 | 0.10  | 0.1274 | 0.3008 | 0.21  | 0.5032 | 0.9198 | 0.06  | 0.2392 | 0.3096 | -0.11 |
| 2650 Mitotic spindle assembly checkpoint protein MAD1                          | Q9Y6D9     | 0.0655              | 0.1694              | 0.21                | 0.2432              | 0.6591              | 0.19                | 0.0077              | 0.0416              | 0.27       | 0.0127 | 0.0456 | 0.15  | 0.0177 | 0.0954 | 0.13  | 0.0375 | 0.1253 | 0.12  | 0.0020 | 0.0537 | -0.32 | 0.4293 | 0.8258 | 0.04  | 0.0920 | 0.0496 | -0.54 |
| 2651 Mitotic spindle assembly checkpoint protein MAD2A                         | Q13257     | 0.4108              | 0.5517              | -3.31               | 0.5752              | 0.7723              | -1.75               | 0.5661              | 0.6974              | -1.19      | 0.5388 | 0.6595 | 0.89  | 0.2938 | 0.4487 | -1.88 | 0.9510 | 1.0614 | 0.09  | 0.1383 | 0.3181 | 0.18  | 0.7219 | 1.1668 | 0.04  | 0.6594 | 0.7144 | -0.03 |
| 2652 Mixed lineage kinase domain-like protein                                  | Q8N816     | 0.4108              | 0.5516              | -3.31               | 0.5752              | 0.7721              | -1.75               | 0.5661              | 0.6972              | -1.19      | 0.5388 | 0.6593 | 0.89  | 0.2938 | 0.4485 | -1.88 | 0.9510 | 1.0612 | 0.09  | 0.3784 | 0.4341 | 0.09  | 0.4610 | 0.8068 | -0.08 | 0.2895 | 0.3164 | -0.09 |
| 2653 MMS19 nucleotide excision repair protein homolog                          | Q96T76     | 0.4533              | 0.5308              | -0.04               | 0.6684              | 0.7561              | 0.06                | 0.8248              | 0.8584              | -0.02      | 0.1438 | 0.2562 | 0.09  | 0.2242 | 0.4329 | -0.07 | 0.7931 | 1.0307 | -0.02 | 0.3736 | 0.4390 | -2.55 | 0.8708 | 0.9202 | -0.33 | 0.0651 | 0.1151 | 2.06  |
| 2654 MOB kinase activator 1B                                                   | Q7L9L4     | 0.3688              | 0.5828              | -0.05               | 0.5441              | 0.8692              | 0.10                | 0.9303              | 0.9458              | 0.00       | 0.0730 | 0.1525 | 0.13  | 0.1170 | 0.2802 | -0.11 | 0.1399 | 0.2934 | -0.11 | 0.5320 | 0.5843 | 0.03  | 0.9772 | 0.9838 | 0.00  | 0.1059 | 0.1622 | -0.11 |
| 2655 MOB-like protein p130cas                                                  | Q9Y3A3     | 0.1320              | 0.2739              | 0.18                | 0.7857              | 0.8456              | -0.03               | 0.6673              | 0.7180              | -0.05      | 0.1851 | 0.3122 | 0.23  | 0.1307 | 0.2986 | -0.20 | 0.9120 | 1.1489 | -0.01 | 0.0000 | 0.0000 | 1.13  | 0.0001 | 0.0192 | 1.05  | 0.0201 | 0.1219 | 1.04  |
| 2656 Moesin                                                                    | P26038     | 0.0140              | 0.0693              | 0.25                | 0.1705              | 0.6611              | 0.18                | 0.0514              | 0.1273              | 0.17       | 0.0464 | 0.1094 | 0.18  | 0.1333 | 0.3022 | 0.10  | 0.0289 | 0.1090 | 0.25  | 0.0224 | 0.1360 | -2.55 | 0.8708 | 0.9333 | -0.33 | 0.0651 | 0.1294 | 0.19  |
| 2657 Molybdopter synthase catalytic subunit                                    | Q96007     | 0.0971              | 0.2204              | 0.16                | 0.3486              | 0.7037              | 0.06                | 0.0576              | 0.1374              | 0.17       | 0.0978 | 0.1909 | 0.14  | 0.7998 | 0.8438 | 0.02  | 0.2015 | 0.3787 | 0.09  | 0.3736 | 0.5020 | -2.55 | 0.8708 | 1.0372 | -0.33 | 0.0651 | 0.1418 | 2.06  |
| 2658 Monoacylglycerol lipase ABHD12                                            | Q8N2K0     | 0.0457              | 0.1368              | -0.20               | 0.6992              | 0.7784              | 0.05                | 0.2584              | 0.4268              | -0.11      | 0.2769 | 0.4348 | 0.08  | 0.0465 | 0.1584 | -0.21 | 0.6801 | 0.9193 | -0.05 | 0.3736 | 0.4460 | -2.55 | 0.8708 | 0.9333 | -0.33 | 0.0651 | 0.1179 | 2.06  |
| 2659 Monocarboxylate transporter 1                                             | P53985     | 0.4108              | 0.5514              | -3.31               | 0.5752              | 0.7719              | -1.75               | 0.5661              | 0.6970              | -1.19      | 0.5388 | 0.6592 | 0.89  | 0.2938 | 0.4484 | -1.88 | 0.9510 | 1.0610 | 0.09  | 0.0007 | 0.0398 | 0.80  | 0.0204 | 0.0417 | 0.59  | 0.0178 | 0.1144 | 0.33  |
| 2660 Monocarboxylate transporter 4                                             | O15427     | 0.4108              | 0.5513              | -3.31               | 0.5752              | 0.7717              | -1.75               | 0.5661              | 0.6969              | -1.19      | 0.5388 | 0.6590 | 0.89  | 0.2938 | 0.4483 | -1.88 | 0.9510 | 1.0608 | 0.09  | 0.0928 | 0.2446 | 0.27  | 0.2038 | 0.5032 | 0.15  | 0.2263 | 0.2967 | 0.14  |
| 2661 Monofunctional C1-tetrahydrofolate synthase, mitochondrial                | Q6UB35     | 0.0018              | 0.0292              | 0.24                | 0.0972              | 0.6341              | 0.22                | 0.0004              | 0.0216              | 0.32       | 0.0012 | 0.0166 | 0.23  | 0.0384 | 0.1429 | 0.08  | 0.0033 | 0.0576 | 0.18  | 0.3058 | 0.5653 | 0.12  | 0.2046 | 0.5042 | 0.19  | 0.2646 | 0.3364 | -0.13 |
| 2662 MORC family CW-type zinc finger protein 4                                 | Q8TE76     | 0.4108              | 0.5511              | -3.31               | 0.5752              | 0.7715              | -1.75               | 0.5661              | 0.6967              | -1.19      | 0.5388 | 0.6589 | 0.89  | 0.2938 | 0.4481 | -1.88 | 0.9510 | 1.0605 | 0.09  | 0.0275 | 0.1435 | -0.30 | 0.0527 | 0.2177 | -0.18 | 0.1205 | 0.1790 | -0.13 |
| 2663 MORN repeat-containing protein 2                                          | Q502X0     | 0.0487              | 0.1415              | 0.17                | 0.2032              | 0.6603              | 0.12                | 0.0128              | 0.0531              | -0.29      | 0.1229 | 0.2266 | 0.11  | 0.0343 | 0.1354 | -0.21 | 0.7105 | 0.9513 | 0.03  | 0.3736 | 0.4449 | -2.55 | 0.8708 | 0.9312 | -0.33 | 0.0651 | 0.1174 | 2.06  |
| 2664 Mortalin family class 1 protein 2                                         | Q15014     | 0.0264              | 0.0985              | 0.29                | 0.6050              | 0.7076              | -0.04               | 0.0774              | 0.1682              | -0.15      | 0.6263 | 0.6727 | -0.03 | 0.0089 | 0.0673 | -0.35 | 0.5613 | 0.7961 | -0.04 | 0.3736 | 0.4558 | -2.55 | 0.8708 | 0.9516 | -0.33 | 0.0651 | 0.1218 | 2.06  |
| 2665 Motilin receptor                                                          | Q43193     | 0.0229              | 0.0904              | 0.49                | 0.0237              | 0.4852              | 0.86                | 0.0273              | 0.0829              | -0.99      | 0.0288 | 0.0781 | 6.49  | 0.0298 | 0.1257 | -5.83 | 0.0323 | 0.1160 | 5.30  | 0.3736 | 0.5791 | -2.55 | 0.8708 | 1.1759 | -0.33 | 0.0651 | 0.1808 | 2.06  |
| 2666 M-phase inducer phosphatase 1                                             | P30304     | 0.4108              | 0.5510              | -3.31               | 0.5752              | 0.7713              | -1.75               | 0.5661              | 0.6965              | -1.19      | 0.5388 | 0.6587 | 0.89  | 0.2938 | 0.4480 | -1.88 | 0.9510 | 1.0603 | 0.09  | 0.0028 | 0.0587 | 1.20  | 0.0003 | 0.0199 | 1.17  | 0.0013 | 0.0458 | 0.56  |
| 2667 M-phase inducer phosphatase 3                                             | P30307     | 0.0027              | 0.0350              | -0.74               | 0.0515              | 0.8229              | -0.21               | 0.0480              | 0.1216              | -0.43      | 0.0249 | 0.0704 | -0.64 | 0.0919 | 0.2390 | 0.22  | 0.0077 | 0.0659 | -0.79 | 0.3736 | 0.6197 | -2.55 | 0.8708 | 1.2471 | -0.33 | 0.0651 | 0.2049 | 2.06  |
| 2668 M-phase phosphoprotein 9                                                  | Q9Y550     | 0.4608              | 0.5376              | 0.05                | 0.8663              | 0.9031              | 0.03                | 0.0094              | 0.0451              | 0.29       | 0.3070 | 0.4739 | 0.07  | 0.0058 | 0.0558 | -0.47 | 0.3288 | 0.5316 | -0.06 | 0.0065 | 0.0844 | 0.36  | 0.0224 | 0.1304 | 0.27  | 0.0058 | 0.0724 | 0.62  |
| 2669 MRG/MORF4L-binding protein                                                | Q9NV56     | 0.0740              | 0.1844              | -0.19               | 0.5299              | 0.8488              | 0.05                | 0.3624              | 0.5602              | 0.02       | 0.0126 | 0.0454 | -0.24 | 0.1168 | 0.2801 | -0.10 | 0.0043 | 0.0602 | -0.27 | 0.3736 | 0.6331 | -2.55 | 0.8708 | 1.2703 | -0.33 | 0.0651 | 0.2134 | 2.06  |
| 2670 mRNA (2'-O-methyladenosine-N(6)-1-methyltransferase                       | Q9H4Z3     | 0.0610              | 0.1634              | 0.25                | 0.1974              | 0.6705              | 0.15                | 0.0102              | 0.0210              | 0.25       | 0.9097 | 0.9216 | -0.02 | 0.4719 | 0.5626 | -0.10 | 0.9236 | 1.1604 | -0.01 | 0.0818 | 0.2282 | 0.26  | 0.6917 | 1.1339 | -0.04 | 0.8269 | 0.8599 | -0.01 |
| 2671 mRNA cap guanine-N7 methyltransferase                                     | Q43148     | 0.7949              | 0.8339              | 0.02                | 0.3154              | 0.6810              | 0.07                | 0.2979              | 0.4792              | 0.08       | 0.0422 | 0.1022 | 0.09  | 0.2546 | 0.4742 | 0.04  | 0.3025 | 0.5005 | 0.14  | 0.0778 | 0.2218 | 0.19  | 0.0508 | 0.2127 | -0.22 | 0.0148 | 0.1049 | -0.26 |
| 2672 mRNA export factor                                                        | P78406     | 0.2459              | 0.4315              | -0.03               | 0.8988              | 0.9280              | -0.02               | 0.5935              | 0.6497              | -0.02      | 0.8635 | 0.8826 | 0.00  | 0.0156 | 0.0888 | -0.10 | 0.5899 | 0.8265 | -0.03 | 0.0115 | 0.1038 | -0.35 | 0.0130 | 0.0950 | -0.34 | 0.0420 | 0.1780 | -0.27 |
| 2673 mRNA turnover protein 4 homolog                                           | Q9UKD2     | 0.4506              | 0.5282              | -0.11               | 0.6903              | 0.7733              | 0.07                | 0.7207              | 0.7656              | -0.05      | 0.6308 | 0.6768 | 0.07  | 0.4225 | 0.5171 | 0.12  | 0.4703 | 0.6929 | -0.10 | 0.0824 | 0.2295 | 0.29  | 0.4310 | 0.8278 | 0.07  | 0.0337 | 0.1568 | 0.28  |
| 2674 mRNA-capping enzyme                                                       | O60942     | 0.0010              | 0.0220              | 1.24                | 0.1135              | 0.6335              | 0.71                | 0.0937              | 0.1941              | 0.65       | 0.0193 | 0.0590 | 0.76  | 0.1350 | 0.3047 | 0.10  | 0.0311 | 0.1133 | 0.91  | 0.2866 | 0.5379 | -0.42 | 0.1414 | 0.4005 | -0.35 | 0.1079 | 0.1643 | 0.12  |
| 2675 Mx2-interacting protein                                                   | Q96T58     | 0.0379              | 0.1222              | -0.11               | 0.1352              | 0.6503              | -0.32               | 0.5104              | 0.7314              | -0.05      | 0.0728 | 0.1523 | -0.26 | 0.0673 | 0.1974 | -0.26 | 0.7879 | 1.0255 | -0.01 | 0.3736 | 0.4395 | -2.55 | 0.8708 | 0.9211 | -0.33 | 0.0651 | 0.1153 | 2.06  |
| 2676 Myt9/38 domain-containing protein                                         | Q9H7C9     | 0.4108              | 0.5509              | -3.31               | 0.5752              | 0.7711              | -1.75               | 0.5661              | 0.6964              | -1.19      | 0.5388 | 0.6586 | 0.89  | 0.2938 | 0.4479 | -1.88 | 0.9510 | 1.0601 | 0.09  | 0.2708 | 0.5138 | 0.18  | 0.2948 | 0.6363 | -0.16 | 0.1223 | 0.1813 | -0.30 |
| 2677 Mucin-1                                                                   | P15941     | 0.7495              | 0.7959              | 0.01                | 0.6157              | 0.7161              | -0.02               | 0.0095              | 0.0454              | 0.27       | 0.5736 | 0.6230 | 0.03  | 0.0036 | 0.0444 | -0.26 | 0.6399 | 0.8769 | -0.40 | 0.3736 | 0.4485 | -2.55 | 0.8708 | 0.9380 | -0.33 | 0.0651 | 0.1189 | 2.06  |
| 2678 Mucopolip-2                                                               | Q8IZK6     | 0.0018              | 0.0291              | 1.58                | 0.0567              | 0.9713              | -0.02               | 0.3050              | 0.4882              | -0.74      | 0.8368 | 0.8595 | -0.07 | 0.5751 | 0.6547 | 0.13  | 0.0325 | 0.1160 | 0.72  | 0.3736 | 0.5784 | -2.55 | 0.8708 | 1.1747 | -0.33 | 0.0651 | 0.1804 | 2.06  |
| 2679 Multidrug resistance protein 1                                            | P08183     | 0.7357              | 0.7851              | -0.02               | 0.2299              | 0.6609              | 0.15                | 0.8769              | 0.9025              | -0.01      | 0.0919 | 0.1820 | 0.06  | 0.1088 | 0.2677 | 0.13  | 0.2168 | 0.3982 | 0.02  | 0.3736 | 0.4989 | -2.55 | 0.8708 | 1.0315 | -0.33 | 0.0651 | 0.1404 | 2.06  |
| 2680 Multifunctional methyltransferase subunit TRM112-like protein             | Q9UI30     | 0.9168              | 0.9365              | 0.01                | 0.7192              | 0.7942              | -0.03               | 0.3155              | 0.5022              | -0.07      | 0.9939 | 0.9945 | 0.00  | 0.5643 | 0.6461 | 0.04  | 0.7697 | 1.0073 | -0.02 | 0.1718 | 0.3691 | 0.06  | 0.1715 | 0.4537 | 0.08  | 0.7993 | 0.8363 | 0.02  |
| 2681 Multifunctional procollagen lysine hydroxylase and aldosyltransferase LH3 | O60568     | 0.0073              | 0.0503              | 0.16                | 0.0852              | 0.6207              | 0.24                | 0.0060              | 0.0376              | 0.24       | 0.0213 | 0.0631 | 0.14  | 0.0805 | 0.2188 | 0.07  | 0.0065 | 0.0625 | 0.19  | 0.0586 | 0.1929 | 0.37  | 0.1808 | 0.4680 | 0.09  | 0.0464 | 0.1884 | 0.10  |
| 2682 Multifunctional protein ADE2                                              | P22234     | 0.0145              | 0.0699              | 0.25                | 0.0616              | 0.5920              | 0.18                | 0.0068              | 0.0398              | 0.30       | 0.0102 | 0.0405 | 0.26  | 0.1052 | 0.2609 | 0.11  | 0.0384 | 0.1274 | 0.19  | 0.2668 | 0.5092 | 0.17  | 0.6158 | 1.0500 | -0.05 | 0.1236 | 0.1829 | -0.14 |
| 2683 Multivesicular body subunit 12A                                           | Q96EY5     | 0.0177              | 0.0780              | -0.27               | 0.2787              | 0.6650              | -0.48               | 0.0008              | 0.0206              | -0.77      | 0.0004 | 0.0126 | -1.39 | 0.0593 | 0.1836 | -0.33 | 0.0521 | 0.1541 | -1.25 | 0.3736 | 0.5593 | -2.55 | 0.8708 | 1.1408 | -0.33 | 0.0651 | 0.1701 | 2.06  |
| 2684 Musklennin                                                                | Q9UL63     | 0.8384              | 0.8707              | -0.02               | 0.4328              | 0.7688              | -0.31               | 0.7164              | 0.7617</            |            |        |        |       |        |        |       |        |        |       |        |        |       |        |        |       |        |        |       |

Supplementary Table S2. Overview on all relatively quantified 5180 proteins statistical analysis

| Protein name                                                                     | UniProt | MCF-7               |            |                     |         | MDA-MB-231          |        |                     |            |
|----------------------------------------------------------------------------------|---------|---------------------|------------|---------------------|---------|---------------------|--------|---------------------|------------|
|                                                                                  |         | Dai SC20 vs control |            | Gen SC20 vs control |         | Dai IC20 vs control |        | Gen IC20 vs control |            |
|                                                                                  |         | p value             | BH q value | log2FC              | p value | BH q value          | log2FC | p value             | BH q value |
| 2721 Myotrophin                                                                  | P58546  | 0.0037              | 0.0388     | 0.21                | 0.1056  | 0.6309              | 0.27   | 0.0370              | 0.1009     |
| 2724 Myotubularin-related protein 14                                             | QNCCE2  | 0.4108              | 0.5491     | -3.31               | 0.5752  | 0.7687              | -1.75  | 0.5661              | 0.6944     |
| 2725 Myotubularin-related protein 4                                              | Q9NYA4  | 0.0070              | 0.0495     | -0.29               | 0.3361  | 0.6950              | -0.06  | 0.6368              | 0.6898     |
| 2726 Myotubularin-related protein 5                                              | Q95248  | 0.3341              | 0.5407     | 0.06                | 0.1384  | 0.6506              | -0.15  | 0.5225              | 0.7438     |
| 2727 Myotubularin-related protein 7                                              | Q9V216  | 0.1911              | 0.3449     | -0.24               | 0.0643  | 0.5916              | -0.44  | 0.0235              | 0.0754     |
| 2728 Myotubularin-related protein 8                                              | Q96F00  | 0.0003              | 0.0152     | 4.14                | 0.7974  | 0.8529              | 0.19   | 0.0326              | 0.0928     |
| 2729 Myristoylated alanine-rich C-kinase substrate                               | T29966  | 0.4108              | 0.5490     | -3.31               | 0.5752  | 0.7687              | -1.75  | 0.5661              | 0.6944     |
| 2730 N(G)-N(G)-dimethylarginine dimethylaminohydrolase 1                         | Q94760  | 0.4108              | 0.5489     | -3.31               | 0.5752  | 0.7683              | -1.75  | 0.5661              | 0.6941     |
| 2731 N(G)-N(G)-dimethylarginine dimethylaminohydrolase 2                         | O95865  | 0.0196              | 0.0821     | -0.18               | 0.1697  | 0.6624              | 0.19   | 0.0336              | 0.0950     |
| 2732 N6-adenosine-methyltransferase catalytic subunit                            | Q86U44  | 0.5072              | 0.5802     | 0.06                | 0.9780  | 0.9856              | 0.00   | 0.0914              | 0.1904     |
| 2733 N6-adenosine-methyltransferase non-catalytic subunit                        | Q9HCES  | 0.0138              | 0.0689     | 9.31                | 0.5732  | 0.8852              | -1.75  | 0.2310              | 0.3905     |
| 2734 Na(+)/H(+) exchange regulatory cofactor NHE-RF1                             | I14745  | 0.0274              | 0.1002     | 0.23                | 0.2977  | 0.6725              | 0.25   | 0.0109              | 0.0483     |
| 2735 NAC-alpha domain-containing protein 1                                       | I15069  | 0.0064              | 0.0480     | -0.31               | 0.1548  | 0.6611              | -0.31  | 0.0701              | 0.1574     |
| 2736 N-acetyl-D-glucosamine kinase                                               | Q9UJ70  | 0.4848              | 0.5593     | 0.04                | 0.3019  | 0.6749              | 0.07   | 0.9651              | 0.9717     |
| 2737 N-acetylglucosamine-6-sulfatase                                             | P15586  | 0.0877              | 0.2063     | 0.12                | 0.0076  | 0.4017              | 0.29   | 0.4594              | 0.6753     |
| 2738 NACHT domain- and WD repeat-containing protein 1                            | I149M9  | 0.6836              | 0.7400     | 0.01                | 0.1326  | 0.6480              | 0.09   | 0.0339              | 0.0955     |
| 2739 NACHT_LRR and PYD domains-containing protein 13                             | Q86W25  | 0.4108              | 0.5487     | -3.31               | 0.5752  | 0.7681              | -1.75  | 0.5661              | 0.6939     |
| 2740 NACHT_LRR and PYD domains-containing protein 2                              | Q9NX02  | 0.1785              | 0.3413     | 0.10                | 0.1167  | 0.6357              | 0.24   | 0.0272              | 0.0827     |
| 2741 NACHT_LRR and PYD domains-containing protein 3                              | Q96P20  | 0.4108              | 0.5486     | -3.31               | 0.5752  | 0.7679              | -1.75  | 0.5661              | 0.6937     |
| 2742 NACHT_LRR and PYD domains-containing protein 5                              | P59047  | 0.2225              | 0.4001     | -0.06               | 0.1624  | 0.6613              | 0.28   | 0.0010              | 0.0214     |
| 2743 NACHT_LRR and PYD domains-containing protein 7                              | Q8W394  | 0.0564              | 0.1554     | 0.14                | 0.0027  | 0.2543              | 0.40   | 0.0294              | 0.0872     |
| 2744 NACHT_LRR and PYD domains-containing protein 9                              | Q7BTU0  | 0.0143              | 0.0696     | 0.16                | 0.2682  | 0.6635              | 0.09   | 0.0704              | 0.1576     |
| 2745 N-acetylneuraminate cytidyltransferase                                      | Q8NFW8  | 0.1758              | 0.3379     | -0.08               | 0.0262  | 0.4935              | 0.15   | 0.0267              | 0.0819     |
| 2746 N-acetylneuraminate-9-ethylsulfatase                                        | Q8TBE9  | 0.2555              | 0.4431     | -0.08               | 0.8771  | 0.9196              | 0.01   | 0.0069              | 0.0396     |
| 2747 NAD kinase 2_mitochondrial                                                  | Q4GQ04  | 0.0565              | 0.1556     | 0.17                | 0.0181  | 0.4665              | 0.23   | 0.0543              | 0.1325     |
| 2748 NAD(P) transhydrogenase_mitochondrial                                       | Q13423  | 0.4108              | 0.5484     | -3.31               | 0.5752  | 0.7677              | -1.75  | 0.5661              | 0.6936     |
| 2749 NAD(P)H dehydrogenase [quinone] 1                                           | P15559  | 0.0705              | 0.1777     | 0.12                | 0.7640  | 0.8295              | -0.05  | 0.0331              | 0.0940     |
| 2750 NAD(P)H-hydrate epimerase                                                   | Q8NCW5  | 0.0399              | 0.1259     | -0.21               | 0.3660  | 0.7241              | -0.28  | 0.0034              | 0.0308     |
| 2751 NAD-dependent malic enzyme_mitochondrial                                    | T23368  | 0.6871              | 0.7429     | 0.03                | 0.5725  | 0.8847              | 0.05   | 0.3431              | 0.5364     |
| 2752 NAD-dependent protein deacetylase sirtuin-2                                 | Q8IXJ6  | 0.4108              | 0.5483     | -3.31               | 0.5752  | 0.7675              | -1.75  | 0.5661              | 0.6934     |
| 2753 NAD-dependent protein deacetylase sirtuin-5_mitochondrial                   | Q9NXA8  | 0.3071              | 0.5077     | -0.06               | 0.0553  | 0.5834              | -0.18  | 0.0891              | 0.1875     |
| 2754 NADH dehydrogenase [ubiquinone] 1 alpha subcomplex assembly factor 2        | Q8N183  | 0.1852              | 0.3499     | 0.04                | 0.2014  | 0.6607              | 0.17   | 0.0119              | 0.0510     |
| 2755 NADH dehydrogenase [ubiquinone] 1 alpha subcomplex assembly factor 4        | Q9P032  | 0.2454              | 0.4311     | 0.09                | 0.2935  | 0.6697              | 0.17   | 0.0565              | 0.1359     |
| 2756 NADH dehydrogenase [ubiquinone] 1 alpha subcomplex subunit 10_mitochondrial | O95299  | 0.7913              | 0.8308     | 0.01                | 0.1215  | 0.6390              | 0.19   | 0.0332              | 0.0942     |
| 2757 NADH dehydrogenase [ubiquinone] 1 alpha subcomplex subunit 11               | Q86Y39  | 0.5341              | 0.6045     | -0.05               | 0.1036  | 0.6336              | -0.21  | 0.1047              | 0.2117     |
| 2758 NADH dehydrogenase [ubiquinone] 1 alpha subcomplex subunit 12               | Q9U109  | 0.0942              | 0.2163     | -0.09               | 0.5964  | 0.7005              | 0.07   | 0.9291              | 0.9452     |
| 2759 NADH dehydrogenase [ubiquinone] 1 alpha subcomplex subunit 13               | Q9P0J0  | 0.0884              | 0.2072     | 0.10                | 0.6267  | 0.7237              | 0.06   | 0.1741              | 0.3159     |
| 2760 NADH dehydrogenase [ubiquinone] 1 alpha subcomplex subunit 5                | Q16718  | 0.0002              | 0.0142     | 0.57                | 0.2932  | 0.6699              | 0.14   | 0.1685              | 0.3076     |
| 2761 NADH dehydrogenase [ubiquinone] 1 alpha subcomplex subunit 6                | P56556  | 0.0952              | 0.2175     | 0.07                | 0.8770  | 0.9113              | 0.02   | 0.0547              | 0.1330     |
| 2762 NADH dehydrogenase [ubiquinone] 1 alpha subcomplex subunit 7                | O95182  | 0.9461              | 0.9594     | -0.04               | 0.8429  | 0.8873              | 0.09   | 0.4555              | 0.6703     |
| 2763 NADH dehydrogenase [ubiquinone] 1 alpha subcomplex subunit 8                | P51970  | 0.3990              | 0.6183     | -0.04               | 0.0069  | 0.4156              | -0.46  | 0.0300              | 0.0879     |
| 2764 NADH dehydrogenase [ubiquinone] 1 alpha subcomplex subunit 9_mitochondrial  | Q16795  | 0.2756              | 0.4691     | 0.06                | 0.9231  | 0.9469              | 0.01   | 0.3280              | 0.5171     |
| 2765 NADH dehydrogenase [ubiquinone] 1 beta subcomplex subunit 10                | O96000  | 0.3739              | 0.5889     | -0.01               | 0.3123  | 0.6806              | 0.12   | 0.0214              | 0.0707     |
| 2766 NADH dehydrogenase [ubiquinone] 1 beta subcomplex subunit 11_mitochondrial  | Q9NX14  | 0.0387              | 0.1237     | 0.21                | 0.0378  | 0.5563              | 0.22   | 0.2135              | 0.3682     |
| 2767 NADH dehydrogenase [ubiquinone] 1 beta subcomplex subunit 3                 | O43676  | 0.7683              | 0.8119     | -0.06               | 0.3315  | 0.6910              | -0.55  | 0.3244              | 0.5123     |
| 2768 NADH dehydrogenase [ubiquinone] 1 beta subcomplex subunit 4                 | O95168  | 0.2988              | 0.4977     | 0.05                | 0.7467  | 0.8165              | 0.04   | 0.2474              | 0.4134     |
| 2769 NADH dehydrogenase [ubiquinone] 1 beta subcomplex subunit 5_mitochondrial   | O43674  | 0.1807              | 0.3444     | -0.24               | 0.2591  | 0.6641              | -0.54  | 0.0881              | 0.1858     |
| 2770 NADH dehydrogenase [ubiquinone] 1 beta subcomplex subunit 6                 | O95139  | 0.8968              | 0.9188     | 0.01                | 0.1796  | 0.6636              | -0.16  | 0.0210              | 0.0702     |
| 2771 NADH dehydrogenase [ubiquinone] 1 beta subcomplex subunit 7                 | P17568  | 0.0253              | 0.0960     | -0.22               | 0.5384  | 0.8544              | 0.25   | 0.0260              | 0.0803     |
| 2772 NADH dehydrogenase [ubiquinone] 1 beta subcomplex subunit 8_mitochondrial   | O95169  | 0.9213              | 0.9398     | 0.01                | 0.5974  | 0.7012              | -0.17  | 0.7013              | 0.7484     |
| 2773 NADH dehydrogenase [ubiquinone] 1 beta subcomplex subunit 9                 | Q9Y6M9  | 0.2423              | 0.4276     | -0.07               | 0.5660  | 0.8389              | -0.07  | 0.3189              | 0.5061     |
| 2774 NADH dehydrogenase [ubiquinone] 1 subunit C2                                | O95298  | 0.8991              | 0.9208     | 0.01                | 0.5182  | 0.8399              | -0.13  | 0.2710              | 0.4441     |
| 2775 NADH dehydrogenase [ubiquinone] flavoprotein 1_mitochondrial                | P49821  | 0.1261              | 0.2649     | 0.07                | 0.3704  | 0.7186              | -0.08  | 0.0075              | 0.0410     |
| 2776 NADH dehydrogenase [ubiquinone] flavoprotein 2_mitochondrial                | P19404  | 0.2085              | 0.3812     | -0.11               | 0.6163  | 0.7161              | -0.08  | 0.0073              | 0.0403     |
| 2777 NADH dehydrogenase [ubiquinone] iron-sulfur protein 2_mitochondrial         | O75306  | 0.0319              | 0.1109     | -0.04               | 0.2621  | 0.6633              | 0.06   | 0.0008              | 0.0207     |
| 2778 NADH dehydrogenase [ubiquinone] iron-sulfur protein 3_mitochondrial         | O75489  | 0.0175              | 0.0774     | -0.31               | 0.0529  | 0.5806              | -0.34  | 0.0018              | 0.0244     |

Supplementary Table S2. Overview on all relatively quantified 5180 proteins statistical analysis

| Protein name                                                                   | UniProt | MCF-7               |            |                     |         | MDA-MB-231          |        |                     |            |
|--------------------------------------------------------------------------------|---------|---------------------|------------|---------------------|---------|---------------------|--------|---------------------|------------|
|                                                                                |         | Dai SC20 vs control |            | Gen SC20 vs control |         | Dai IC20 vs control |        | Gen IC20 vs control |            |
|                                                                                |         | p value             | BH q value | log2FC              | p value | BH q value          | log2FC | p value             | BH q value |
| 2779 NADH dehydrogenase [ubiquinone] iron-sulfur protein 4_mitochondrial       | O43181  | 0.1568              | 0.3104     | -0.15               | 0.5553  | 0.8508              | -0.07  | 0.9534              | 0.9633     |
| 2780 NADH dehydrogenase [ubiquinone] iron-sulfur protein 5                     | O43920  | 0.0635              | 0.1668     | 0.08                | 0.8572  | 0.8970              | -0.01  | 0.4263              | 0.6362     |
| 2781 NADH dehydrogenase [ubiquinone] iron-sulfur protein 6_mitochondrial       | O75380  | 0.0224              | 0.0891     | 0.19                | 0.6162  | 0.7162              | 0.06   | 0.9529              | 0.9631     |
| 2782 NADH dehydrogenase [ubiquinone] iron-sulfur protein 8_mitochondrial       | O00217  | 0.0618              | 0.1647     | -0.22               | 0.6430  | 0.7367              | -0.11  | 0.0055              | 0.0357     |
| 2783 NADH-cytochrome b5 reductase 3                                            | P00387  | 0.0110              | 0.0602     | 0.17                | 0.3066  | 0.6787              | 0.14   | 0.1465              | 0.2742     |
| 2784 NADH-ubiquinone oxidoreductase 75 kDa subunit_mitochondrial               | P28331  | 0.0141              | 0.0694     | 0.19                | 0.2866  | 0.6672              | 0.22   | 0.0125              | 0.0523     |
| 2785 NADH-ubiquinone oxidoreductase chain 4                                    | P03905  | 0.5248              | 0.5963     | -0.05               | 0.3548  | 0.7063              | -0.09  | 0.1338              | 0.2561     |
| 2786 NADP-dependent malic enzyme                                               | P48163  | 0.0214              | 0.0871     | 0.13                | 0.7612  | 0.8271              | -0.02  | 0.0028              | 0.0288     |
| 2787 NADP-dependent malic enzyme_mitochondrial                                 | P16798  | 0.4557              | 0.5329     | -1.46               | 0.3311  | 0.6905              | -2.64  | 0.0001              | 0.0148     |
| 2788 NADPH:cytochrome P450 reductase                                           | P22570  | 0.0099              | 0.0581     | 0.13                | 0.1637  | 0.6640              | 0.15   | 0.0468              | 0.1198     |
| 2789 NADPH-cytochrome P450 reductase                                           | P16435  | 0.0105              | 0.0592     | 0.32                | 0.2151  | 0.6620              | 0.24   | 0.0176              | 0.0589     |
| 2790 N-alpha-acetyltransferase 10                                              | P41227  | 0.2723              | 0.4651     | 0.13                | 0.2135  | 0.6626              | 0.21   | 0.0652              | 0.1491     |
| 2791 N-alpha-acetyltransferase 11                                              | Q9BSU3  | 0.0377              | 0.1218     | -0.16               | 0.0245  | 0.4835              | 0.21   | 0.0429              | 0.1125     |
| 2792 N-alpha-acetyltransferase 15_NatA auxiliary subunit                       | Q9BXJ9  | 0.0074              | 0.0494     | 0.33                | 0.3501  | 0.7043              | 0.20   | 0.0149              | 0.0576     |
| 2793 N-alpha-acetyltransferase 16_NatA auxiliary subunit                       | Q6N069  | 0.4780              | 0.5533     | 0.07                | 0.1918  | 0.6672              | 0.14   | 0.0157              | 0.0591     |
| 2794 N-alpha-acetyltransferase 20                                              | P61599  | 0.6697              | 0.7282     | 0.03                | 0.6547  | 0.7452              | -0.03  | 0.0439              | 0.1142     |
| 2795 N-alpha-acetyltransferase 35_NatC auxiliary subunit                       | Q5VZE5  | 0.0752              | 0.1866     | -0.22               | 0.2442  | 0.6568              | 0.13   | 0.0419              | 0.6270     |
| 2796 N-alpha-acetyltransferase 40                                              | Q86UY6  | 0.0004              | 0.0166     | 2.43                | 0.6362  | 0.7322              | 0.33   | 0.2759              | 0.4503     |
| 2797 N-alpha-acetyltransferase 50                                              | Q9GZZ1  | 0.1584              | 0.3129     | 0.09                | 0.6666  | 0.7765              | 0.04   | 0.0277              | 0.0837     |
| 2798 Nascent polypeptide-associated complex subunit alpha_muscle-specific form | E9PAV3  | 0.1242              | 0.2621     | 0.10                | 0.2969  | 0.6603              | 0.17   | 0.0117              | 0.0507     |
| 2799 Natural cytotoxicity triggering receptor 2                                | O95944  | 0.4311              | 0.5087     | 0.06                | 0.4170  | 0.7550              | 0.15   | 0.1614              | 0.2966     |
| 2800 Nck-associated protein 1                                                  | Q9Y2A7  | 0.0101              | 0.0586     | 0.90                | 0.5081  | 0.8300              | 0.10   | 0.0393              | 0.1052     |
| 2801 Nck-associated protein 5-like                                             | Q9CHC0  | 0.0238              | 0.0926     | -0.19               | 0.0810  | 0.6152              | -0.36  | 0.4723              | 0.6897     |
| 2802 Nebulette                                                                 | T60401  | 0.4215              | 0.4989     | 0.09                | 0.0741  | 0.6112              | 0.20   | 0.1182              | 0.2339     |
| 2803 Nebulin                                                                   | P20929  | 0.4108              | 0.5482     | -3.31               | 0.5752  | 0.7673              | -1.75  | 0.5661              | 0.6932     |
| 2804 Nebulin-related-anchoring protein                                         | Q86V77  | 0.1282              | 0.2684     | 0.09                | 0.0236  | 0.4851              | 0.34   | 0.0571              | 0.1367     |
| 2805 NEDD4-binding protein 1                                                   | Q75113  | 0.4108              | 0.5480     | -3.31               | 0.5752  | 0.7673              | -1.75  | 0.5661              | 0.6931     |
| 2806 NEDD4-binding protein 2                                                   | Q68LW6  | 0.4682              | 0.5441     | 0.11                | 0.7693  | 0.8351              | 0.06   | 0.5471              | 0.7001     |
| 2807 NEDD8                                                                     | P15843  | 0.0405              | 0.1269     | -0.40               | 0.1054  | 0.6326              | 0.30   | 0.0866              | 0.1835     |
| 2808 NEDD8-activating enzyme E1 catalytic subunit                              | Q8TBC4  | 0.4108              | 0.5479     | -3.31               | 0.5752  | 0.7669              | -1.75  | 0.5661              | 0.6929     |
| 2809 NEDD8-activating enzyme E1 regulatory subunit                             | P13564  | 0.9813              | 0.9872     | 0.40                | 0.0564  | 0.5831              | -10.13 | 0.0238              | 0.0757     |
| 2810 NEDD8-conjugating enzyme Ubc12                                            | P61081  | 0.0653              | 0.1690     | 0.12                | 0.0824  | 0.5055              | 0.18   | 0.0126              | 0.0526     |
| 2811 NEDD8-conjugating enzyme UBE2F                                            | Q969M7  | 0.0009              | 0.0218     | 0.47                | 0.0559  | 0.5838              | 0.30   | 0.0002              | 0.0225     |
| 2812 Negative elongation factor 1                                              | Q9H3P2  | 0.7749              | 0.8167     | 0.01                | 0.3107  | 0.5912              | 0.31   | 0.0068              | 0.0398     |
| 2813 Negative elongation factor 2                                              | Q8W9X2  | 0.0096              | 0.0574     | -0.31               | 0.8955  | 0.9263              | 0.02   | 0.0001              | 0.0133     |
| 2814 Negative elongation factor C/D                                            | Q8IXH7  | 0.0875              | 0.2059     | -0.12               | 0.4077  | 0.7500              | 0.09   | 0.0513              | 0.1272     |
| 2815 Negative elongation factor E                                              | P18615  | 0.1404              | 0.2858     | 0.17                | 0.1910  | 0.6685              | 0.20   | 0.1899              | 0.3364     |
| 2816 Nephrocystin-3                                                            | Q7Z494  | 0.0330              | 0.1134     | -0.22               | 0.2557  | 0.6623              | -0.08  | 0.0512              | 0.1271     |
| 2817 Nesprin-1                                                                 | Q8NFP1  | 0.0172              | 0.0767     | 0.15                | 0.1355  | 0.6505              | 0.18   | 0.0037              | 0.0319     |
| 2818 Nesprin-2                                                                 | Q8W9X0  | 0.1345              | 0.2780     | 0.10                | 0.1866  | 0.6544              | 0.23   | 0.0654              | 0.1209     |
| 2819 Nestin                                                                    | P48681  | 0.0116              | 0.0620     | 0.16                | 0.2393  | 0.6615              | 0.17   | 0.0042              | 0.0322     |
| 2820 Netrin receptor UNC5D                                                     | Q6UXZ4  | 0.3032              | 0.5029     | -0.06               | 0.4040  | 0.7477              | -0.08  | 0.0559              | 0.1351     |
| 2821 Neudeuin                                                                  | Q9UMX5  | 0.4108              | 0.5477     | -3.31               | 0.5752  | 0.7667              | -1.75  | 0.5661              | 0.6927     |
| 2822 Netrin-specific leucine zipper protein                                    | P54845  | 0.8935              | 0.9165     | 0.00                | 0.5395  | 0.8549              | 0.08   | 0.1745              | 0.3163     |
| 2823 Neuraligin-like protein 4                                                 | Q961N8  | 0.5385              | 0.6090     | -0.09               | 0.4745  | 0.7807              | 0.07   | 0.8880              | 0.9112     |
| 2824 Neuroblast differentiation-associated protein AHNK                        | Q96666  | 0.0098              | 0.0579     | 0.16                | 0.1266  | 0.6429              | 0.31   | 0.0012              | 0.0229     |
| 2825 Neuroblastoma breakpoint family member 12                                 | Q5TGA4  | 0.4567              | 0.5337     | 0.05                | 0.2923  | 0.6694              | 0.10   | 0.5157              | 0.7359     |
| 2826 Neuroblastoma breakpoint family member 6                                  | Q5VWK0  | 0.3940              | 0.6120     | 0.40                | 0.2681  | 0.6638              | 0.18   | 0.0464              | 0.1193     |
| 2827 Neuroblastoma-amplified sequence                                          | A2RRP1  | 0.0803              | 0.1949     | -0.13               | 0.4624  | 0.7947              | 0.12   | 0.1537              | 0.2851     |
| 2828 Neurokinin-delta                                                          | P61601  | 0.0034              | 0.0381     | 0.22                | 0.5866  | 0.6923              | -0.08  | 0.2132              | 0.3681     |
| 2829 Neurokinin-B receptor 1                                                   | P29120  | 0.0169              | 0.0760     | 0.28                | 0.1262  | 0.6434              | 0.30   | 0.5618              | 0.7863     |
| 2830 Neuroendocrine convertase 2                                               | P16519  | 0.4675              | 0.5438     | 0.03                | 0.0453  | 0.5614              | -0.12  | 0.0970              | 0.1966     |
| 2831 Neurofilament                                                             | O94856  | 0.8414              | 0.8734     | 0.01                | 0.2634  | 0.6432              | 0.35   | 0.0572              | 0.1368     |
| 2832 Neurofilament                                                             | P21359  | 0.0014              | 0.0254     | -0.22               | 0.7869  | 0.8467              | 0.04   | 0.0049              | 0.0340     |
| 2833 Neurofilament light polypeptide                                           | P07196  | 0.4108              | 0.5476     | -3.31               | 0.5752  | 0.7665              | -1.75  | 0.5661              | 0.6926     |
| 2834 Neurofilament medium polypeptide                                          | P07197  | 0.4108              | 0.5475     | -3.31               | 0.5752  | 0.7663              | -1.75  | 0.5661              | 0.6924     |
| 2835 Neurogenic differentiation factor 4                                       | Q9HD90  | 0.4108              | 0.5473     | -3.31               | 0.5752  | 0.7661              | -1.75  | 0.5661              | 0.6923     |
| 2836 Neurogenic differentiation factor 6                                       | Q96NK8  | 0.4108              | 0.5472     | -3.31               | 0.5752  | 0.7659              | -1.75  | 0.5661              | 0.6921     |
| 2837 Neurogenic locus notch homolog protein 1                                  | P46531  | 0.4108              | 0.5470     | -3.31               | 0.5752  | 0.7658              | -1.75  | 0.5661              | 0.6919     |
| 2838 Neurogenic locus notch homolog protein 2                                  | Q04721  | 0.0154              | 0.0719     | 0.30                | 0.1436  | 0.6548              | 0.34   | 0.0019              | 0.0245     |
| 2839 Neurokinin B receptor                                                     | Q9BYT9  | 0.0011              | 0.0226     | 0.16                | 0.1781  | 0.6632              | 0.10   | 0.0000              | 0.0000     |
| 2840 Neuronal acetylcholine receptor subunit alpha-7                           | P36544  | 0.0075              | 0.0510     | 0.17                | 0.1596  | 0.6640              | -0.15  | 0.0093              | 0.0451     |
| 2841 Neuronal calcium sensor 1                                                 | P62166  | 0.4108              | 0.5469     | -3.31               | 0.5752  | 0.7656              | -1.75  | 0.5661              | 0.6918     |
| 2842 Neuronal migration protein doublecortin                                   | Q43602  | 0.4108              | 0.5467     | -3.31               | 0.5752  | 0.7654              | -1.75  | 0.5661              | 0.6916     |
| 2843 Neuronal pentraxin-2                                                      | P47972  | 0.4108              | 0.5466     | -3.31               | 0.5752  | 0.7652              | -1.75  | 0.5661              | 0.6914     |
| 2844 Neuron-specific calcium-binding protein hippocampal                       | P84074  | 0.0419              | 0.1299     | 0.14                | 0.0483  | 0.5738              | -0.24  | 0.6250              | 0.6783     |
| 2845 Neurexin and toll-like protein 2                                          | Q8NC67  | 0.4108              | 0.5465     | -3.31               | 0.5752  | 0.7650              | -1.75  | 0.5661              | 0.6913     |
| 2846 Neuronal alpha-glucosidase AB                                             | P14697  | 0.0073              | 0.0502     | 0.19                | 0.3505  | 0.7043              | 0.17   | 0.0038              | 0.0315     |
| 2847 Neuronal amino acid transporter A                                         | P43007  | 0.0021              | 0.0316     | 0.93                | 0.2204  | 0.6599              | 0.20   | 0.0048              | 0.0337     |
| 2848 Neuronal amino acid transporter B(O)                                      | P15758  | 0.0099              | 0.0580     | 0.27                | 0.2204  | 0.6579              | 0.26   | 0.0009              | 0.0208     |
| 2849 Neuronal and basic amino acid transport protein rBAT                      | Q07837  | 0.4108              | 0.5463     | -3.31               | 0.5752  | 0.7648              | -1.75  | 0.5661              | 0.6911     |
| 2850 Neuronal ceramidase                                                       | Q9NR71  | 0.4108              | 0.5462     | -3.31               | 0.5752  | 0.7646              | -1.75  | 0.5661              | 0.6910     |
| 2851 Neuronal cholesterol ester hydrolase 1                                    | Q6PIU2  | 0.4108              | 0.5460     | -3.31               | 0.5752  | 0.7644              | -1.75  | 0.5661              | 0.6908     |
| 2852 NFATC2-interacting protein                                                | Q8NCF5  | 0.0205              | 0.0847     | -2.00               | 0.0964  | 0.6353              | -1.98  | 0.0203              | 0.0686     |
| 2853 NF-kappa-B essential modulator                                            | Q9Y6K9  | 0.0004              | 0.0164     | -0.97               | 0.0016  | 0.2181              | -0.57  | 0.2050              | 0.3580     |

Supplementary Table S2. Overview on all relatively quantified 5180 proteins statistical analysis

| Protein name                                                     | UniProt | MCF-7               |            |                     |         | MDA-MB-231          |        |                     |            |        |         |            |        |        |        |        |        |        |        |        |        |        |        |        |        |        |        |       |
|------------------------------------------------------------------|---------|---------------------|------------|---------------------|---------|---------------------|--------|---------------------|------------|--------|---------|------------|--------|--------|--------|--------|--------|--------|--------|--------|--------|--------|--------|--------|--------|--------|--------|-------|
|                                                                  |         | Dai SC20 vs control |            | Gen SC20 vs control |         | Dai IC20 vs control |        | Gen IC20 vs control |            |        |         |            |        |        |        |        |        |        |        |        |        |        |        |        |        |        |        |       |
|                                                                  |         | p value             | BH q value | log2FC              | p value | BH q value          | log2FC | p value             | BH q value | log2FC | p value | BH q value | log2FC |        |        |        |        |        |        |        |        |        |        |        |        |        |        |       |
| 2854 NF-kappa-B inhibitor-like protein 1                         | Q9UBC1  | 0.4108              | 0.5459     | -3.31               | 0.5752  | 0.7642              | -1.75  | 0.5661              | 0.6906     | -1.19  | 0.5388  | 0.6532     | 0.89   | 0.2938 | -1.88  | 0.9510 | 1.0522 | 0.09   | 0.0015 | 0.0501 | 0.74   | 0.0078 | 0.0725 | 0.51   | 0.5024 | 0.5695 | 0.17   |       |
| 2855 NF-kappa-B-activating protein                               | Q8NSV7  | 0.6476              | 0.7091     | -0.07               | 0.0343  | 0.5288              | -0.69  | 0.4130              | 0.6192     | 0.21   | 0.0625  | 0.1361     | -0.31  | 0.1129 | 0.2740 | -0.27  | 0.4888 | 0.7142 | 0.08   | 0.7376 | 0.4612 | -2.55  | 0.8708 | 0.9618 | -0.33  | 0.0651 | 0.1241 | 2.06  |
| 2856 NF-X1-type zinc finger protein NFXL1                        | Q6GNB6  | 0.2007              | 0.3716     | -0.06               | 0.2364  | 0.6634              | -0.06  | 0.2333              | 0.3938     | -0.03  | 0.0065  | 0.0323     | -0.11  | 0.4129 | 0.5077 | 0.05   | 0.2146 | 0.3962 | 0.08   | 0.7376 | 0.4997 | -2.55  | 0.8708 | 1.0329 | -0.33  | 0.0651 | 0.1407 | 2.06  |
| 2857 NF-X1-type zinc finger-containing protein 1                 | Q9P2E3  | 0.8936              | 0.9164     | -0.02               | 0.0759  | 0.6172              | 0.46   | 0.0294              | 0.0872     | 0.39   | 0.1027  | 0.1979     | 0.25   | 0.0668 | 0.1966 | 0.31   | 0.0601 | 0.1697 | 0.34   | 0.0207 | 0.1329 | 0.46   | 0.4487 | 0.8514 | -0.11  | 0.2863 | 0.5382 | 0.06  |
| 2858 NGF1-A-binding protein 1                                    | Q13506  | 0.0606              | 0.1630     | -0.07               | 0.3395  | 0.6977              | -0.12  | 0.042               | 0.2108     | 0.07   | 0.0161  | 0.0526     | -0.03  | 0.0205 | 0.1028 | -0.10  | 0.0645 | 0.1772 | 0.18   | 0.0093 | 0.0633 | -0.98  | 0.0001 | 0.0120 | -2.09  | 0.0001 | 0.0273 | -1.81 |
| 2859 NGF1-A-binding protein 2                                    | Q15742  | 0.6236              | 0.6912     | -0.02               | 0.2798  | 0.6648              | 0.18   | 0.0349              | 0.0970     | 0.17   | 0.0220  | 0.0645     | -0.20  | 0.1145 | 0.2766 | -0.09  | 0.7314 | 0.9712 | 0.01   | 0.7376 | 0.4435 | -2.55  | 0.8708 | 0.9285 | -0.33  | 0.0651 | 0.1168 | 2.06  |
| 2860 NHP2-like protein 1                                         | Q55739  | 0.0025              | 0.0025     | -0.07               | 0.3734  | 0.9823              | 0.08   | 0.0286              | 0.0838     | 0.07   | 0.0264  | 0.0366     | -0.03  | 0.3178 | 0.4949 | -0.02  | 0.4888 | 0.7314 | 0.08   | 0.7376 | 0.4612 | -2.55  | 0.8708 | 0.9618 | -0.33  | 0.0651 | 0.1241 | 2.06  |
| 2861 NHP2-like protein 1                                         | Q6P7A1  | 0.0138              | 0.2792     | -0.02               | 0.2469  | 0.6502              | 0.08   | 0.0286              | 0.0838     | 0.07   | 0.0264  | 0.0366     | -0.03  | 0.3178 | 0.4949 | -0.02  | 0.4888 | 0.7314 | 0.08   | 0.7376 | 0.4612 | -2.55  | 0.8708 | 0.9618 | -0.33  | 0.0651 | 0.1241 | 2.06  |
| 2862 Nibrin                                                      | Q6O934  | 0.4108              | 0.5458     | -3.31               | 0.5752  | 0.7642              | -1.75  | 0.5661              | 0.6905     | -1.19  | 0.5388  | 0.6530     | 0.89   | 0.2938 | 0.4432 | -1.88  | 0.9510 | 1.0519 | 0.09   | 0.0916 | 0.2430 | 0.22   | 0.1025 | 0.5131 | -0.11  | 0.5715 | 0.6346 | -0.07 |
| 2863 Nicotin                                                     | Q69V93  | 0.0103              | 0.0590     | 0.24                | 0.0958  | 0.6322              | -0.17  | 0.0050              | 0.0346     | 0.34   | 0.0019  | 0.0194     | 0.39   | 0.0306 | 0.1277 | 0.18   | 0.0078 | 0.0662 | 0.30   | 0.7363 | 0.4321 | 0.05   | 0.1379 | 0.3933 | 0.10   | 0.1059 | 0.1623 | 0.11  |
| 2864 Nicotin-1                                                   | Q9BSH3  | 0.6558              | 0.7167     | -0.21               | 0.4253  | 0.7618              | -1.20  | 0.0580              | 0.1382     | -1.81  | 0.1691  | 0.2905     | -0.74  | 0.5034 | 0.5926 | -0.31  | 0.3519 | 0.5573 | -0.58  | 0.7376 | 0.4742 | -2.55  | 0.8708 | 0.9860 | -0.33  | 0.0651 | 0.1295 | 2.06  |
| 2865 Nicotinamide N-methyltransferase                            | Q6A021  | 0.4108              | 0.5456     | -3.31               | 0.5752  | 0.7638              | -1.75  | 0.5661              | 0.6903     | -1.19  | 0.5388  | 0.6529     | 0.89   | 0.2938 | 0.4431 | -1.88  | 0.9510 | 1.0517 | 0.09   | 0.0696 | 0.2077 | 0.36   | 0.3324 | 0.6893 | 0.10   | 0.1133 | 0.0926 | 0.51  |
| 2866 Nicotinamide phosphoribosyltransferase                      | P43490  | 0.0531              | 0.1497     | 0.11                | 0.2689  | 0.6633              | 0.10   | 0.0031              | 0.0301     | 0.19   | 0.0090  | 0.0383     | 0.20   | 0.5434 | 0.6279 | 0.02   | 0.0090 | 0.0687 | 0.22   | 0.1749 | 0.7376 | -0.09  | 0.0375 | 0.1763 | 0.11   | 0.0372 | 0.1657 | -0.12 |
| 2867 Nicotinate phosphoribosyltransferase                        | Q6XQ06  | 0.4108              | 0.5455     | -3.31               | 0.5752  | 0.7636              | -1.75  | 0.5661              | 0.6901     | -1.19  | 0.5388  | 0.6527     | 0.89   | 0.2938 | 0.4429 | -1.88  | 0.9510 | 1.0515 | 0.09   | 0.1049 | 0.2640 | 0.28   | 0.4038 | 0.7899 | 0.13   | 0.1020 | 0.0940 | 0.58  |
| 2868 NIK-related protein kinase                                  | Q722Y5  | 0.5438              | 0.6140     | -0.04               | 0.6408  | 0.7352              | -0.01  | 0.6905              | 0.7390     | 0.01   | 0.2928  | 0.0800     | 0.11   | 0.4317 | 0.5259 | -0.03  | 0.2326 | 0.4166 | -0.06  | 0.7376 | 0.4944 | -2.55  | 0.8708 | 1.0233 | -0.33  | 0.0651 | 0.1384 | 2.06  |
| 2869 NIN                                                         | Q8N4C6  | 0.2682              | 0.4600     | 0.07                | 0.4024  | 0.7460              | 0.13   | 0.0305              | 0.0889     | 0.19   | 0.2352  | 0.3799     | 0.07   | 0.0989 | 0.2513 | 0.13   | 0.0108 | 0.0871 | 0.29   | 0.0175 | 0.1228 | 0.16   | 0.0023 | 0.0407 | 0.90   | 0.134  | 0.1009 | 0.33  |
| 2870 NIPA-like protein 2                                         | Q9H8A1  | 0.0007              | 0.0200     | -0.16               | 0.0189  | 0.4654              | -0.21  | 0.0047              | 0.0338     | -0.12  | 0.0503  | 0.1154     | -0.19  | 0.0102 | 0.0721 | -0.41  | 0.0149 | 0.0812 | -0.26  | 0.7376 | 0.6029 | -2.55  | 0.8708 | 1.2178 | -0.33  | 0.0651 | 0.1946 | 2.06  |
| 2871 Nipped-B-like protein                                       | Q6CK79  | 0.0014              | 0.0254     | -0.48               | 0.0481  | 0.9686              | -0.01  | 0.0047              | 0.0333     | -0.43  | 0.0097  | 0.0397     | -0.30  | 0.0095 | 0.0695 | -0.37  | 0.0093 | 0.0691 | -0.40  | 0.7376 | 0.6155 | -2.55  | 0.8708 | 1.2399 | -0.33  | 0.0651 | 0.2023 | 2.06  |
| 2872 Nitric oxide synthase-interacting protein                   | Q9Y314  | 0.9892              | 0.9921     | 0.00                | 0.3224  | 0.6844              | -0.07  | 0.0214              | 0.0707     | -0.17  | 0.4191  | 0.6108     | -0.18  | 0.0600 | 0.1845 | -0.13  | 0.7318 | 0.9712 | -0.01  | 0.6519 | 0.6965 | -0.05  | 0.0035 | 0.0486 | -0.20  | 0.1105 | 0.1675 | 0.06  |
| 2873 NLR family member X1                                        | Q8MT76  | 0.1576              | 0.3117     | -0.11               | 0.0869  | 0.6200              | -0.54  | 0.0346              | 0.0968     | -0.33  | 0.8941  | 0.9099     | 0.02   | 0.0870 | 0.2310 | -0.13  | 0.1624 | 0.3242 | 0.29   | 0.0374 | 0.1605 | -0.20  | 0.7944 | 1.2372 | -0.01  | 0.9090 | 0.9274 | -0.01 |
| 2874 NmrA-like family domain-containing protein 1                | Q9HBL8  | 0.0684              | 0.1736     | 0.13                | 0.1249  | 0.7523              | 0.11   | 0.0408              | 0.1080     | 0.16   | 0.0857  | 0.1731     | 0.12   | 0.0293 | 0.1246 | 0.19   | 0.0624 | 0.1738 | 0.14   | 0.7376 | 0.5545 | -2.55  | 0.8708 | 1.1322 | -0.33  | 0.0651 | 0.1675 | 2.06  |
| 2875 Nodal modulator 1                                           | Q15155  | 0.2487              | 0.4352     | -0.05               | 0.1570  | 0.6623              | 0.08   | 0.0092              | 0.0450     | 0.16   | 0.0063  | 0.0317     | 0.18   | 0.0185 | 0.0971 | 0.13   | 0.0665 | 0.1808 | 0.08   | 0.7376 | 0.5509 | -2.55  | 0.8708 | 1.1257 | -0.33  | 0.0651 | 0.1656 | 2.06  |
| 2876 Nodal modulator 3                                           | Q69849  | 0.6815              | 0.7382     | -0.04               | 0.2004  | 0.6653              | 0.10   | 0.0731              | 0.1617     | -0.11  | 0.1144  | 0.2152     | 0.47   | 0.0444 | 0.1355 | 0.13   | 0.0337 | 0.1183 | 0.60   | 0.7376 | 0.5765 | -2.55  | 0.8708 | 1.1713 | -0.33  | 0.0651 | 0.1794 | 2.06  |
| 2877 Noelin-3                                                    | Q69P87  | 0.4108              | 0.5453     | -3.31               | 0.5752  | 0.7634              | -1.75  | 0.5661              | 0.6900     | -1.19  | 0.5388  | 0.6526     | 0.89   | 0.2938 | 0.4428 | -1.88  | 0.9510 | 1.0513 | 0.09   | 0.1341 | 0.5676 | -0.15  | 0.7591 | 1.2010 | -0.02  | 0.8269 | 0.4499 | 0.62  |
| 2878 Non-histone chromosomal protein HMG-14                      | Q05114  | 0.4021              | -0.4021    | -1.12               | 0.0272  | 0.9804              | 0.06   | 0.0501              | 0.1251     | -1.26  | 0.1848  | 0.3121     | -0.51  | 0.1826 | 0.3758 | -0.42  | 0.1153 | 0.2557 | -3.15  | 0.0095 | 0.0997 | 0.47   | 0.1198 | 0.3579 | 0.78   | 0.2833 | 0.1475 | 3.47  |
| 2879 Non-histone chromosomal protein HMG-17                      | Q05210  | 0.4108              | 0.5452     | -3.31               | 0.5752  | 0.7632              | -1.75  | 0.5661              | 0.6899     | -1.19  | 0.5388  | 0.6524     | 0.89   | 0.2938 | 0.4427 | -1.88  | 0.9510 | 1.0510 | 0.09   | 0.0528 | 0.1817 | 0.07   | 0.0851 | 0.2809 | 0.44   | 0.4573 | 0.1905 | 0.07  |
| 2880 Non-POU domain-containing octamer-binding protein 1         | Q15233  | 0.0245              | 0.0945     | 0.14                | 0.2616  | 0.6636              | 0.21   | 0.0123              | 0.0520     | 0.32   | 0.0102  | 0.0164     | 0.41   | 0.0195 | 0.1000 | 0.15   | 0.0076 | 0.0656 | 0.30   | 0.0272 | 0.1456 | 0.59   | 0.2211 | 0.5285 | 0.13   | 0.0588 | 0.2168 | 0.21  |
| 2881 Non-receptor tyrosine-protein kinase TYK2                   | P25997  | 0.8264              | 0.8608     | 0.06                | 0.0402  | 0.8851              | -0.12  | 0.7312              | 0.7244     | -0.07  | 0.3832  | 0.5681     | -0.26  | 0.7679 | 0.8195 | 0.06   | 0.9400 | 1.1761 | -0.05  | 0.7376 | 0.4320 | -2.55  | 0.8708 | 0.9069 | -0.33  | 0.0651 | 0.1123 | 2.06  |
| 2882 Non-specific lipid-transfer protein                         | P22307  | 0.1780              | 0.3406     | 0.11                | 0.2674  | 0.6653              | 0.13   | 0.9144              | 0.9722     | 0.00   | 0.3260  | 0.4978     | 0.02   | 0.2727 | 0.4965 | -0.04  | 0.2596 | 0.4509 | 0.03   | 0.2449 | 0.7879 | 0.11   | 0.2459 | 0.5669 | -0.05  | 0.2072 | 0.2760 | -0.03 |
| 2883 Non-structural maintenance of chromosomes element 3 homolog | Q96MG7  | 0.0053              | 0.0444     | 0.31                | 0.4616  | 0.7941              | -0.07  | 0.9129              | 0.9314     | -0.01  | 0.1977  | 0.3289     | -0.08  | 0.0285 | 0.1226 | -0.20  | 0.1460 | 0.3017 | -0.10  | 0.0321 | 0.1512 | -0.18  | 0.0003 | 0.0179 | -0.84  | 0.0293 | 0.1465 | -1.24 |
| 2884 Nostriin                                                    | Q8IV19  | 0.0905              | 0.2106     | 0.08                | 0.3270  | 0.6861              | 0.03   | 0.0290              | 0.0864     | 0.28   | 0.3055  | 0.4718     | -0.10  | 0.0537 | 0.1718 | 0.10   | 0.3719 | 0.5799 | 0.03   | 0.7376 | 0.4716 | -2.55  | 0.8708 | 0.9810 | -0.33  | 0.0651 | 0.1184 | 2.06  |
| 2885 Notch homolog 2 N-terminal-like protein C                   | P0DPK4  | 0.3531              | 0.5631     | 0.21                | 0.4340  | 0.7707              | 0.17   | 0.9143              | 0.9323     | -0.02  | 0.8474  | 0.8687     | -0.04  | 0.5362 | 0.6216 | -0.14  | 0.6272 | 0.8631 | 0.10   | 0.7376 | 0.4496 | -2.55  | 0.8708 | 0.9401 | -0.33  | 0.0651 | 0.1293 | 2.06  |
| 2886 Notchless protein homolog 1                                 | Q9NVY2  | 0.4108              | 0.5451     | -3.31               | 0.5752  | 0.7630              | -1.75  | 0.5661              | 0.6897     | -1.19  | 0.5388  | 0.6523     | 0.89   | 0.2938 | 0.4425 | -1.88  | 0.9510 | 1.0508 | 0.09   | 0.2027 | 0.4155 | -0.10  | 0.6582 | 1.0991 | -0.19  | 0.0221 | 0.1264 | 0.77  |
| 2887 NPC intracellular cholesterol transporter 2                 | P61916  | 0.4108              | 0.5449     | -3.31               | 0.5752  | 0.7628              | -1.75  | 0.5661              | 0.6895     | -1.19  | 0.5388  | 0.6521     | 0.89   | 0.2938 | 0.4424 | -1.88  | 0.9510 | 1.0506 | 0.09   | 0.0006 | 0.0374 | -5.61  | 0.0009 | 0.0071 | -4.59  | 0.0000 | 0.0000 | -5.18 |
| 2888 NSF1 cofactor p47                                           | Q9UNZ2  | 0.0660              | 0.1703     | 0.16                | 0.1995  | 0.6637              | 0.18   | 0.0150              | 0.0576     | 0.27   | 0.0121  | 0.0442     | 0.40   | 0.0924 | 0.2398 | 0.14   | 0.0114 | 0.0731 | 0.40   | 0.0371 | 0.1600 | 0.38   | 0.4850 | 0.8957 | 0.08   | 0.3246 | 0.3960 | 0.10  |
| 2889 N-terminal Kinase-like protein                              | Q96K69  | 0.0376              | 0.1218     | -0.09               | 0.4458  | 0.7817              | 0.07   | 0.0456              | 0.1175     | -0.13  | 0.0000  | 0.0000     | -0.22  | 0.0039 | 0.0468 | -0.15  | 0.0009 | 0.0453 | -0.15  | 0.2143 | 0.4336 | 0.24   | 0.2826 | 0.6208 | 0.18   | 0.2246 | 0.1265 | 0.66  |
| 2890 N-terminal Xaa-Pro-Lys-N-methyltransferase 1                | Q9BV86  | 0.9897              | 0.9922     | 0.00                | 0.5279  | 0.8463              | 0.08   | 0.0168              | 0.0613     | 0.33   | 0.0667  | 0.1475     | 0.19   | 0.2183 | 0.4242 | 0.11   | 0.1022 | 0.2370 | 0.19   | 0.5570 | 0.6076 | 0.11   | 0.8794 | 0.9089 | 0.03   | 0.9926 | 0.9939 | 0.00  |
| 2891 Nuclear apoptosis-inducing factor 1                         | Q69Y17  | 0.0640              | 0.1675     | -1.17               | 0.0535  | 0.5847              | -10.14 | 0.0189              | 0.0658     | -9.58  | 0.0009  | 0.0149     | -7.50  | 0.0353 | 0.1361 | -1.77  | 0.0084 | 0.0476 | -8.31  | 0.7376 | 0.6173 | -2.55  | 0.8708 | 1.2430 | -0.33  | 0.0651 | 0.2034 | 2.06  |
| 2892 Nuclear autoantigen Sp-100                                  | P23497  | 0.0098              | 0.0578     | 0.24                | 0.2112  | 0.6620              | 0.27   | 0.0018              | 0.0240     | 0.51   | 0.0166  | 0.0537     | 0.21   | 0.0207 | 0.1030 | -0.14  | 0.0109 | 0.0716 | 0.27   | 0.0081 | 0.0914 | 0.64   | 0.0316 | 0.0977 | 0.43   | 0.0074 | 0.0784 | 0.02  |
| 2893 Nuclear autoantigenic sperm protein                         | P09378  | 0.0626              | 0.2626     | 0.00                | 0.2660  | 0.6620              | 0      |                     |            |        |         |            |        |        |        |        |        |        |        |        |        |        |        |        |        |        |        |       |

Supplementary Table S2. Overview on all relatively quantified 5180 proteins statistical analysis

| Protein name                                                             | UniProt | MCF-7               |            |                     |         | MDA-MB-231          |        |                     |            |
|--------------------------------------------------------------------------|---------|---------------------|------------|---------------------|---------|---------------------|--------|---------------------|------------|
|                                                                          |         | Dai SC20 vs control |            | Gen SC20 vs control |         | Dai IC20 vs control |        | Gen IC20 vs control |            |
|                                                                          |         | p value             | BH q value | log2FC              | p value | BH q value          | log2FC | p value             | BH q value |
|                                                                          |         | p value             | BH q value | log2FC              | p value | BH q value          | log2FC | p value             | BH q value |
| 2936 Nucleolar protein 58                                                | Q9Y2X3  | 0.0938              | 0.2156     | -0.10               | 0.9063  | 0.9348              | -0.01  | 0.8576              | 0.8865     |
| 2937 Nucleolar protein 8                                                 | Q76FK4  | 0.0104              | 0.0591     | -0.42               | 0.4840  | 0.8085              | -0.10  | 0.1225              | 0.2407     |
| 2938 Nucleolar protein 9                                                 | Q86U38  | 0.4108              | 0.5438     | -3.31               | 0.5752  | 0.7613              | -1.75  | 0.5661              | 0.6882     |
| 2939 Nucleolar RNA helicase 2                                            | Q9NR30  | 0.9362              | 0.9516     | 0.01                | 0.7502  | 0.8188              | -0.04  | 0.0567              | 0.1360     |
| 2940 Nucleolar transcription factor 1                                    | P17480  | 0.0830              | 0.1984     | 0.14                | 0.2754  | 0.6641              | 0.17   | 0.1070              | 0.2154     |
| 2941 Nucleolin                                                           | P19338  | 0.0018              | 0.0290     | 0.21                | 0.0820  | 0.6165              | 0.21   | 0.0001              | 0.0207     |
| 2942 Nucleosyn TIA-1 isoform p40                                         | P11483  | 0.6720              | 0.7304     | -0.03               | 0.1527  | 0.6586              | 0.13   | 0.0641              | 0.1477     |
| 2943 Nucleosyn TIAR                                                      | Q10185  | 0.4326              | 0.5100     | -0.45               | 0.2343  | 0.6607              | -2.82  | 0.0706              | 0.1581     |
| 2944 Nucleosom                                                           | P06748  | 0.0993              | 0.2240     | 0.17                | 0.0312  | 0.4411              | 0.16   | 0.0014              | 0.0232     |
| 2945 Nucleoplasmin-3                                                     | Q75607  | 0.2091              | 0.3817     | 0.15                | 0.0698  | 0.6016              | 0.29   | 0.8616              | 0.8898     |
| 2946 Nucleoporin NUP188 homolog                                          | Q5SR5E  | 0.5093              | 0.5821     | -0.04               | 0.2814  | 0.6650              | -0.15  | 0.6473              | 0.7000     |
| 2947 Nucleoporin NUP35                                                   | Q8NFH5  | 0.4108              | 0.5437     | -3.31               | 0.5752  | 0.7611              | -1.75  | 0.5661              | 0.6880     |
| 2948 Nucleoporin Nup37                                                   | Q8NFH4  | 0.5395              | 0.6096     | -0.06               | 0.2784  | 0.6649              | 0.17   | 0.9489              | 0.9598     |
| 2949 Nucleoporin p54                                                     | Q723B4  | 0.0000              | 0.0000     | 0.37                | 0.0509  | 0.5719              | -0.27  | 0.0000              | 0.0000     |
| 2950 Nucleoporin SEH1                                                    | Q96E3E  | 0.9313              | 0.9480     | 0.01                | 0.3139  | 0.6806              | 0.36   | 0.3681              | 0.5655     |
| 2951 Nucleoporin-like protein 2                                          | U15504  | 0.0825              | 0.1978     | -0.86               | 0.1103  | 0.6334              | -0.48  | 0.2540              | 0.4220     |
| 2952 Nucleoprotein TPR                                                   | P12270  | 0.8674              | 0.8949     | 0.01                | 0.3475  | 0.7037              | 0.15   | 0.0151              | 0.0577     |
| 2953 Nucleoredoxin                                                       | Q6DKJ4  | 0.4108              | 0.5435     | -3.31               | 0.5752  | 0.7609              | -1.75  | 0.5661              | 0.6879     |
| 2954 Nucleoredoxin-like protein 1                                        | Q96CM4  | 0.5036              | 0.5768     | 0.79                | 0.2609  | 0.7184              | -0.18  | 0.6222              | 0.7662     |
| 2955 Nucleoredoxin-like protein 2                                        | Q5V203  | 0.4108              | 0.5434     | -3.31               | 0.5752  | 0.7607              | -1.75  | 0.5661              | 0.6877     |
| 2956 Nucleoside diphosphate kinase 3                                     | Q13232  | 0.1459              | 0.2936     | 0.29                | 0.6586  | 0.7481              | 0.06   | 0.0555              | 0.1346     |
| 2957 Nucleoside diphosphate kinase 7                                     | Q9Y3B8  | 0.4108              | 0.5433     | -3.31               | 0.5752  | 0.7605              | -1.75  | 0.5661              | 0.6875     |
| 2958 Nucleoside diphosphate kinase A                                     | P15531  | 0.0024              | 0.0333     | 0.15                | 0.5027  | 0.8238              | 0.13   | 0.0190              | 0.0660     |
| 2959 Nucleoside diphosphate kinase B                                     | P23292  | 0.0046              | 0.0429     | 0.30                | 0.3934  | 0.7373              | 0.18   | 0.0040              | 0.0321     |
| 2960 Nucleoside diphosphate-linked moiety X motif 19                     | ARMXV4  | 0.3714              | 0.5858     | 0.06                | 0.7496  | 0.8187              | 0.02   | 0.0947              | 0.1957     |
| 2961 Nucleosome assembly protein 1-like 1                                | P55209  | 0.0006              | 0.0194     | 0.21                | 0.0315  | 0.5115              | 0.23   | 0.0002              | 0.0235     |
| 2962 Nucleosome assembly protein 1-like 2                                | Q99457  | 0.4108              | 0.5431     | -3.31               | 0.5752  | 0.7603              | -1.75  | 0.5661              | 0.6874     |
| 2963 Nucleosome assembly protein 1-like 4                                | Q99733  | 0.3532              | 0.5631     | 0.03                | 0.1141  | 0.6342              | 0.10   | 0.0062              | 0.0382     |
| 2964 Nucleosome-remodeling factor subunit BPTF                           | Q12830  | 0.0297              | 0.1056     | -0.27               | 0.1370  | 0.6517              | -0.30  | 0.0113              | 0.0493     |
| 2965 Nucleosome-associated protein 1                                     | Q96RE7  | 0.0038              | 0.0392     | 0.17                | 0.6178  | 0.5913              | 0.12   | 0.0108              | 0.0485     |
| 2966 Nucleosome-associated protein 2                                     | Q96RF6  | 0.7203              | 0.7715     | -0.06               | 0.6109  | 0.7124              | -0.04  | 0.9051              | 0.9251     |
| 2967 Nucleosome-associated protein 3                                     | Q96RF6  | 0.4663              | 0.5426     | 0.03                | 0.4560  | 0.7879              | 0.06   | 0.4927              | 0.7137     |
| 2968 Nucleosome-associated protein 4                                     | Q8WVJ2  | 0.0008              | 0.0207     | 0.59                | 0.4002  | 0.7441              | 0.10   | 0.0149              | 0.0576     |
| 2969 Nucleosome-associated protein 5                                     | Q8WVJ2  | 0.0008              | 0.0207     | 0.59                | 0.4002  | 0.7441              | 0.10   | 0.0149              | 0.0576     |
| 2970 NXPE family member 1                                                | Q8N323  | 0.3756              | 0.5908     | -0.06               | 0.0668  | 0.4193              | -0.33  | 0.0045              | 0.0333     |
| 2971 Obg-like ATPase 1                                                   | Q9NTK5  | 0.0382              | 0.1226     | 0.18                | 0.2828  | 0.6644              | 0.21   | 0.0135              | 0.0544     |
| 2972 Obscurin                                                            | Q5V579  | 0.0812              | 0.1965     | 0.21                | 0.1526  | 0.6593              | 0.24   | 0.0024              | 0.0271     |
| 2973 Occludin                                                            | P11625  | 0.0079              | 0.0525     | -0.06               | 0.3946  | 0.7384              | 0.10   | 0.0212              | 0.0704     |
| 2974 OCIA domain-containing protein 1                                    | Q9N400  | 0.0446              | 0.1344     | -0.15               | 0.9299  | 0.9525              | -0.01  | 0.6264              | 0.4321     |
| 2975 OCIA domain-containing protein 2                                    | Q56V13  | 0.0778              | 0.1908     | -0.23               | 0.2703  | 0.6632              | -0.13  | 0.5401              | 0.7621     |
| 2976 Oligomycin resistance factor                                        | Q9Y3B8  | 0.4108              | 0.5430     | -3.31               | 0.5752  | 0.7601              | -1.75  | 0.5661              | 0.6872     |
| 2977 Oligomycin resistance factor complex subunit OSTC                   | Q9NRP0  | 0.0008              | 0.0206     | 0.41                | 0.0114  | 0.4310              | -0.26  | 0.2035              | 0.3559     |
| 2978 Omega-3 fatty acid desaturase                                       | Q9NOR4  | 0.0381              | 0.1227     | -0.56               | 0.5629  | 0.8764              | -0.11  | 0.0681              | 0.1540     |
| 2979 Oncoferritin                                                        | P0CE72  | 0.6002              | 0.6659     | -0.13               | 0.5808  | 0.6885              | -0.51  | 0.2795              | 0.4546     |
| 2980 Oncoferritin-like protein                                           | Q9NZT2  | 0.0936              | 0.2152     | -0.10               | 0.0007  | 0.2266              | 0.14   | 0.5345              | 0.7554     |
| 2981 Oncoferritin-like protein                                           | Q14982  | 0.1900              | 0.3558     | -0.64               | 0.2570  | 0.6636              | -1.51  | 0.5776              | 0.6351     |
| 2982 Oral-facial-digital syndrome 1 protein                              | Q75665  | 0.4108              | 0.5428     | -3.31               | 0.5752  | 0.7609              | -1.75  | 0.5661              | 0.6871     |
| 2983 Ornithine aminotransferase mitochondrial                            | P04181  | 0.0033              | 0.0376     | 0.09                | 0.4358  | 0.7718              | 0.08   | 0.0049              | 0.0341     |
| 2984 Orotidine                                                           | Q9HC10  | 0.0972              | 0.2205     | 0.05                | 0.7994  | 0.8548              | -0.01  | 0.1698              | 0.3094     |
| 2985 Orotidine                                                           | Q9NRC9  | 0.9848              | 0.9888     | 0.00                | 0.2822  | 0.6642              | -0.08  | 0.9148              | 0.9323     |
| 2986 OTU domain-containing protein 7B                                    | Q6GQO9  | 0.0078              | 0.0523     | 0.23                | 0.0435  | 0.5705              | 0.29   | 0.0020              | 0.0195     |
| 2987 Outer dense fiber protein 2                                         | Q5BJF6  | 0.0259              | 0.0974     | 0.15                | 0.0076  | 0.4059              | 0.22   | 0.0147              | 0.0573     |
| 2988 Overexpressed in colon carcinoma 1 protein                          | Q8TAD7  | 0.4745              | 0.5501     | -0.68               | 0.1614  | 0.6635              | -1.88  | 0.0537              | 0.1314     |
| 2989 Oxidation resistance protein 1                                      | Q8N573  | 0.0029              | 0.0362     | -0.42               | 0.0850  | 0.6201              | -0.30  | 0.7934              | 0.8309     |
| 2990 Oxidative stress-induced growth inhibitor 1                         | Q9UJX0  | 0.0792              | 0.1930     | -0.64               | 0.3177  | 0.6809              | -1.02  | 0.6932              | 0.7411     |
| 2991 Oxidoreductase HTATIP2                                              | Q9BUP3  | 0.0179              | 0.0676     | 0.21                | 0.0645  | 0.5903              | 0.30   | 0.0175              | 0.0631     |
| 2992 Oxygen-dependent coproporphyrinogen-III oxidase mitochondrial       | P36551  | 0.0010              | 0.0219     | -1.26               | 0.1207  | 0.6380              | -0.93  | 0.0026              | 0.0281     |
| 2993 Oxyester-binding protein 1                                          | P22059  | 0.2730              | 0.4659     | 0.10                | 0.1989  | 0.6651              | 0.09   | 0.0000              | 0.0000     |
| 2994 Oxyester-binding protein-related protein 2                          | Q9H1P3  | 0.4108              | 0.5427     | -3.31               | 0.5752  | 0.7597              | -1.75  | 0.5661              | 0.6869     |
| 2995 Oxyester-binding protein-related protein 3                          | Q9H4L5  | 0.0181              | 0.0789     | 0.21                | 0.2319  | 0.6626              | 0.18   | 0.0126              | 0.0526     |
| 2996 Oxyester-binding protein-related protein 9                          | Q96SU4  | 0.4108              | 0.5426     | -3.31               | 0.5752  | 0.7595              | -1.75  | 0.5661              | 0.6867     |
| 2997 Oxytocin receptor                                                   | P30559  | 0.5004              | 0.5741     | -0.05               | 0.0232  | 0.4807              | -0.31  | 0.2767              | 0.4512     |
| 2998 Oxytocin-neurophysin 1                                              | P01178  | 0.6342              | 0.6962     | 0.12                | 0.2414  | 0.6617              | 0.32   | 0.9477              | 0.9590     |
| 2999 P antigen family member 2                                           | Q722X7  | 0.0088              | 0.0557     | 0.43                | 0.0913  | 0.6300              | 0.26   | 0.0248              | 0.0782     |
| 3000 P antigen family member 5                                           | Q96GU1  | 0.0334              | 0.1142     | 5.50                | 0.0162  | 0.4536              | 6.00   | 0.0304              | 0.0887     |
| 3001 P2X purinoceptor 4                                                  | Q95771  | 0.0114              | 0.0613     | 0.22                | 0.4836  | 0.8083              | 0.17   | 0.0131              | 0.0535     |
| 3002 Patchy domain protein 2 homolog                                     | Q15645  | 0.0785              | 0.1920     | 0.28                | 0.5169  | 0.8088              | -0.11  | 0.2435              | 0.4082     |
| 3003 PAK4-inhibitor INKA2                                                | Q5N717  | 0.5553              | 0.6245     | -0.07               | 0.4165  | 0.7549              | -0.19  | 0.1147              | 0.2278     |
| 3004 Palmitoyl-protein thioesterase 1                                    | P08977  | 0.0003              | 0.0149     | -0.38               | 0.0010  | 0.2647              | -0.27  | 0.0170              | 0.0619     |
| 3005 Pancreatic alpha-amylase                                            | P04746  | 0.9751              | 0.9833     | 0.00                | 0.2971  | 0.6715              | -0.08  | 0.1476              | 0.2757     |
| 3006 Pancreatic progenitor cell differentiation and proliferation factor | Q9H3Y8  | 0.0039              | 0.0394     | -0.48               | 0.0410  | 0.5694              | -12.05 | 0.0009              | 0.0220     |
| 3007 Pancreatic prohomone                                                | P01298  | 0.1600              | 0.3150     | 0.26                | 0.2631  | 0.6638              | 0.22   | 0.1483              | 0.2766     |
| 3008 Pantothate kinase 2 mitochondrial                                   | Q9BZ23  | 0.4108              | 0.5424     | -3.31               | 0.5752  | 0.7593              | -1.75  | 0.5661              | 0.6866     |
| 3009 Pantothate kinase 4                                                 | Q9NVE7  | 0.1391              | 0.2837     | 0.09                | 0.5556  | 0.5830              | 0.34   | 0.0179              | 0.0639     |
| 3010 Paraneoplastic antigen Ma1                                          | Q8ND90  | 0.0154              | 0.0719     | 0.12                | 0.0405  | 0.5685              | 0.13   | 0.0473              | 0.1206     |
| 3011 Parascle component 1                                                | Q8WXP1  | 0.4103              | 0.6316     | -0.06               | 0.3381  | 0.6972              | 0.08   | 0.6818              | 0.7312     |
| 3012 Parathyroidin                                                       | P20962  | 0.0812              | 0.1964     | -0.21               | 0.6678  | 0.7556              | -0.21  | 0.0096              | 0.0456     |
| 3013 Partitioning defective 3 homolog                                    | Q8TEW0  | 0.2132              | 0.3872     | -0.08               | 0.1777  | 0.6993              | 0.16   | 0.4499              | 0.6636     |
| 3014 Partitioning defective 6 homolog beta                               | Q9BYG5  | 0.9614              | 0.9715     | 0.00                | 0.3793  | 0.7255              | 0.05   | 0.4912              | 0.7119     |
| 3015 Partner of Y14 and maso                                             | Q9BRP8  | 0.0995              | 0.2242     | -0.11               | 0.4138  | 0.7529              | 0.11   | 0.4708              | 0.6879     |
| 3016 Paxillin                                                            | P49023  | 0.0035              | 0.0380     | 0.15                | 0.2097  | 0.6615              | 0.20   | 0.1117              | 0.6178     |



Supplementary Table S2. Overview on all relatively quantified 5180 proteins statistical analysis

| Protein name                                                             | UniProt    | MCF-7               |                     |                     |                     | MDA-MB-231          |                     |                     |                     |            |        |        |       |        |        |       |        |        |       |        |        |       |        |        |        |        |        |       |
|--------------------------------------------------------------------------|------------|---------------------|---------------------|---------------------|---------------------|---------------------|---------------------|---------------------|---------------------|------------|--------|--------|-------|--------|--------|-------|--------|--------|-------|--------|--------|-------|--------|--------|--------|--------|--------|-------|
|                                                                          |            | Dai SC20 vs control | Gen SC20 vs control | SSE SC20 vs control | Dai IC20 vs control | Gen IC20 vs control | SSE IC20 vs control | Dai IC20 vs control | Gen IC20 vs control |            |        |        |       |        |        |       |        |        |       |        |        |       |        |        |        |        |        |       |
| p value                                                                  | BH q value | log2FC              | p value             | BH q value          | log2FC              | p value             | BH q value          | log2FC              | p value             | BH q value | log2FC |        |       |        |        |       |        |        |       |        |        |       |        |        |        |        |        |       |
| 3017 PDZ and LIM domain protein 1                                        | O00151     | 0.7021              | 0.7555              | -0.05               | 0.6631              | 0.7519              | 0.06                | 0.8276              | 0.8608              | -0.02      | 0.2974 | 0.4612 | -0.13 | 0.3172 | 0.4144 | 0.11  | 0.5120 | 0.7390 | 0.07  | 0.6417 | 0.6865 | -0.06 | 0.6641 | 1.0119 | -0.03  | 0.0452 | 0.1857 | -0.16 |
| 3018 PDZ and LIM domain protein 2                                        | Q96YV6     | 0.4108              | 0.5423              | -3.31               | 0.5752              | 0.7591              | -1.75               | 0.5661              | 0.6864              | -0.19      | 0.5388 | 0.6492 | 0.89  | 0.2938 | 0.4400 | -1.88 | 0.9510 | 1.0463 | 0.09  | 0.6273 | 0.1430 | 0.38  | 0.3781 | 0.7547 | 0.09   | 0.2311 | 0.3012 | -0.17 |
| 3019 PDZ and LIM domain protein 5                                        | Q96HIC4    | 0.3476              | 0.5566              | -0.07               | 0.6189              | 0.7175              | 0.03                | 0.7076              | 0.1580              | 0.14       | 0.0401 | 0.0986 | 0.19  | 0.1039 | 0.2591 | 0.11  | 0.0611 | 0.1716 | 0.16  | 0.2958 | 0.5516 | 0.12  | 0.5763 | 1.0068 | 0.04   | 0.8492 | 0.8784 | -0.01 |
| 3020 PDZ and LIM domain protein 7                                        | Q9NR12     | 0.0030              | 0.0366              | 1.74                | 0.2210              | 0.6598              | -0.39               | 0.0539              | 0.1318              | 0.53       | 0.0229 | 0.0664 | 0.35  | 0.0877 | 0.2318 | 0.23  | 0.0096 | 0.0700 | 0.50  | 0.3031 | 0.5615 | 0.24  | 0.0122 | 0.24   | 0.0064 | 0.0752 | 0.33   |       |
| 3021 PDZ domain-containing protein 2                                     | Q15018     | 0.1620              | 0.3181              | 0.18                | 0.3450              | 0.7025              | -0.12               | 0.0626              | 0.1454              | -0.28      | 0.1169 | 0.2184 | -0.21 | 0.2050 | 0.4067 | -0.16 | 0.9522 | 0.9805 | 0.01  | 0.3736 | 0.4308 | -2.55 | 0.8708 | 0.9047 | -0.33  | 0.0651 | 0.1119 | 2.06  |
| 3022 PDZ domain-containing protein 4                                     | Q76C19     | 0.9842              | 0.9886              | 0.00                | 0.9120              | 0.9383              | 0.01                | 0.7382              | 0.7812              | 0.03       | 0.2699 | 0.4257 | 0.11  | 0.2594 | 0.4801 | -0.12 | 0.9115 | 1.1485 | 0.01  | 0.7178 | 0.7582 | -0.15 | 0.2246 | 0.5344 | 0.37   | 0.0427 | 0.1798 | 0.74  |
| 3023 PDZ domain-containing protein 8                                     | Q9NEN9     | 0.8625              | 0.8912              | 0.01                | 0.8220              | 0.8936              | 0.03                | 0.0668              | 0.1520              | 0.22       | 0.2042 | 0.3378 | 0.13  | 0.7597 | 0.8122 | -0.03 | 0.3206 | 0.5234 | 0.09  | 0.3736 | 0.4785 | -2.55 | 0.8708 | 0.9940 | -0.33  | 0.0651 | 0.1314 | 2.06  |
| 3024 PDZ domain-containing protein GIPC1                                 | Q14908     | 0.7875              | 0.8276              | -0.01               | 0.8181              | 0.8702              | 0.03                | 0.4704              | 0.6879              | 0.04       | 0.2012 | 0.3338 | 0.09  | 0.1785 | 0.3694 | -0.08 | 0.2197 | 0.4010 | -0.07 | 0.3736 | 0.4980 | -2.55 | 0.8708 | 1.0299 | -0.33  | 0.0651 | 0.1400 | 2.06  |
| 3025 Pecanex-like protein 4                                              | Q63HM2     | 0.1850              | 0.3499              | -0.18               | 0.6338              | 0.7447              | 0.11                | 0.3596              | 0.5565              | -0.11      | 0.8822 | 0.8992 | 0.02  | 0.0249 | 0.1136 | -0.55 | 0.2096 | 0.3907 | 0.17  | 0.3736 | 0.5007 | -2.55 | 0.8708 | 1.0348 | -0.33  | 0.0651 | 0.1412 | 2.06  |
| 3026 Peflin                                                              | Q9UBV8     | 0.2891              | 0.4859              | -0.72               | 0.4733              | 0.8017              | -0.58               | 0.2947              | 0.4753              | -0.19      | 0.4458 | 0.6402 | 0.25  | 0.2154 | 0.4201 | 0.26  | 0.1957 | 0.3709 | 0.44  | 0.3736 | 0.5032 | -2.55 | 0.8708 | 1.0393 | -0.33  | 0.0651 | 0.1423 | 2.06  |
| 3027 Peptidocopeptide repeat domain-containing protein 3_mitochondrial   | Q96EY7     | 0.1189              | 0.2541              | -0.16               | 0.7512              | 0.8195              | 0.08                | 0.6113              | 0.6664              | -0.07      | 0.2910 | 0.4531 | -0.27 | 0.0765 | 0.2125 | 0.20  | 0.1372 | 0.2901 | -0.23 | 0.9720 | 0.9773 | 0.00  | 0.2037 | 0.5032 | -0.16  | 0.9640 | 0.9713 | 0.00  |
| 3028 Peptidase M20 domain-containing protein 2                           | Q8IYS1     | 0.4108              | 0.5422              | -3.31               | 0.5752              | 0.7589              | -1.75               | 0.5661              | 0.6863              | -1.19      | 0.5388 | 0.6491 | 0.89  | 0.2938 | 0.4399 | -1.88 | 0.9510 | 1.0461 | 0.09  | 0.1986 | 0.4090 | 0.11  | 0.1742 | 0.4576 | 0.13   | 0.8016 | 0.8380 | -0.02 |
| 3029 Peptide chain release factor 1_mitochondrial                        | O75570     | 0.4108              | 0.5420              | -3.31               | 0.5752              | 0.7587              | -1.75               | 0.5661              | 0.6861              | -1.19      | 0.5388 | 0.6489 | 0.89  | 0.2938 | 0.4397 | -1.88 | 0.9510 | 1.0459 | 0.09  | 0.2271 | 0.4526 | 0.81  | 0.0737 | 0.2631 | -1.67  | 0.5344 | 0.6003 | -1.08 |
| 3030 Peptide-N(4)-(N-acetyl-beta-glucosaminyl)asparagine amidase         | Q96IV0     | 0.0002              | 0.0140              | 0.40                | 0.9463              | 0.9645              | -0.01               | 0.0268              | 0.0820              | 0.31       | 0.0249 | 0.0704 | 0.11  | 0.3520 | 0.4498 | 0.03  | 0.3393 | 0.5435 | 0.09  | 0.3736 | 0.4753 | -2.55 | 0.8708 | 0.9879 | -0.33  | 0.0651 | 0.1299 | 2.06  |
| 3031 Peptidyl-prolyl cis-trans isomerase A                               | P62937     | 0.0005              | 0.0182              | 0.49                | 0.1980              | 0.6695              | 0.24                | 0.0036              | 0.0316              | 0.35       | 0.0045 | 0.0274 | 0.26  | 0.4589 | 0.5510 | 0.03  | 0.0029 | 0.0542 | 0.40  | 0.1909 | 0.3970 | 0.22  | 0.0575 | 0.2293 | -0.21  | 0.0264 | 0.1387 | -0.31 |
| 3032 Peptidyl-prolyl cis-trans isomerase A-like 4A                       | Q9Y536     | 0.1580              | 0.3123              | -0.14               | 0.1291              | 0.6436              | -0.08               | 0.3582              | 0.5550              | 0.08       | 0.0765 | 0.1584 | -0.18 | 0.8480 | 0.8833 | -0.01 | 0.2278 | 0.4104 | -0.06 | 0.9955 | 0.9963 | 0.00  | 0.0955 | 0.3084 | 0.28   | 0.0055 | 0.0714 | 0.71  |
| 3033 Peptidyl-prolyl cis-trans isomerase A-like 4G                       | P0DN37     | 0.0046              | 0.0428              | 0.32                | 0.0924              | 0.6298              | 0.15                | 0.0163              | 0.0604              | 0.26       | 0.3656 | 0.5464 | -0.05 | 0.0448 | 0.1559 | 0.16  | 0.0572 | 0.1645 | 0.13  | 0.6649 | 0.7090 | 0.09  | 0.1570 | 0.4287 | -0.22  | 0.0455 | 0.1822 | -0.41 |
| 3034 Peptidyl-prolyl cis-trans isomerase A-like 4H                       | A0AF75B767 | 0.0025              | 0.0335              | -0.84               | 0.0494              | 0.5776              | -1.01               | 0.0099              | 0.0219              | -1.11      | 0.0032 | 0.0233 | -1.31 | 0.0015 | 0.0305 | -1.28 | 0.0060 | 0.0623 | -0.92 | 0.3736 | 0.6255 | -2.55 | 0.8708 | 1.2572 | -0.33  | 0.0651 | 0.2085 | 2.06  |
| 3035 Peptidyl-prolyl cis-trans isomerase B                               | P23284     | 0.0107              | 0.0998              | 0.37                | 0.3380              | 0.6807              | 0.20                | 0.0079              | 0.0416              | 0.34       | 0.0047 | 0.0278 | 0.38  | 0.0383 | 0.1426 | 0.23  | 0.0074 | 0.0651 | 0.50  | 0.2516 | 0.4878 | 0.14  | 0.3490 | 0.7112 | -0.10  | 0.0478 | 0.1989 | -0.25 |
| 3036 Peptidyl-prolyl cis-trans isomerase C                               | P45877     | 0.4686              | 0.5445              | -0.04               | 0.4721              | 0.8010              | -0.05               | 0.0321              | 0.0919              | -0.13      | 0.0101 | 0.0403 | -0.18 | 0.0568 | 0.1783 | -0.10 | 0.4498 | 0.6726 | 0.04  | 0.3736 | 0.4643 | -2.55 | 0.8708 | 0.9673 | -0.33  | 0.0651 | 0.1254 | 2.06  |
| 3037 Peptidyl-prolyl cis-trans isomerase D                               | Q80752     | 0.0009              | 0.0217              | 0.36                | 0.3834              | 0.7307              | -0.07               | 0.3220              | 0.5095              | -0.05      | 0.2166 | 0.3545 | -0.08 | 0.1443 | 0.3188 | -0.12 | 0.1171 | 0.2526 | 0.08  | 0.2106 | 0.4280 | 0.12  | 0.5470 | 0.9724 | 0.04   | 0.1043 | 0.1605 | -0.24 |
| 3038 Peptidyl-prolyl cis-trans isomerase F_mitochondrial                 | P30405     | 0.7159              | 0.7675              | 0.02                | 0.1917              | 0.6687              | 0.13                | 0.0254              | 0.0792              | 0.29       | 0.0028 | 0.0217 | 0.39  | 0.1183 | 0.2821 | 0.11  | 0.0090 | 0.0693 | 0.34  | 0.0075 | 0.0893 | -0.36 | 0.0309 | 0.0506 | -0.48  | 0.0143 | 0.1033 | -0.36 |
| 3039 Peptidyl-prolyl cis-trans isomerase FKBP10                          | Q96AY3     | 0.0049              | 0.0432              | 0.15                | 0.0293              | 0.5128              | 0.12                | 0.0034              | 0.0315              | 0.20       | 0.0132 | 0.0467 | 0.11  | 0.0441 | 0.1555 | 0.07  | 0.0995 | 0.2332 | 0.16  | 0.0916 | 0.2431 | 0.30  | 0.7027 | 1.1446 | 0.05   | 0.2435 | 0.3136 | -0.15 |
| 3040 Peptidyl-prolyl cis-trans isomerase FKBP14                          | Q9NWM8     | 0.5870              | 0.6536              | -0.08               | 0.8626              | 0.9009              | -0.02               | 0.2952              | 0.4758              | -0.10      | 0.4191 | 0.6107 | 0.07  | 0.0367 | 0.1394 | 0.68  | 0.8671 | 1.1033 | -0.02 | 0.0278 | 0.1365 | -0.25 | 0.3249 | 0.6789 | 0.09   | 0.0797 | 0.9027 | 0.01  |
| 3041 Peptidyl-prolyl cis-trans isomerase FKBP1A                          | P62942     | 0.0560              | 0.1548              | 0.17                | 0.2387              | 0.6609              | 0.21                | 0.0233              | 0.0752              | 0.22       | 0.0366 | 0.0920 | 0.20  | 0.0631 | 0.1903 | 0.17  | 0.0230 | 0.0969 | 0.25  | 0.1842 | 0.3854 | 0.23  | 0.6290 | 1.0651 | -0.04  | 0.0687 | 0.1161 | -0.11 |
| 3042 Peptidyl-prolyl cis-trans isomerase FKBP2                           | P26885     | 0.0452              | 0.1356              | 0.09                | 0.2873              | 0.8935              | -0.01               | 0.0093              | 0.0448              | -0.20      | 0.0046 | 0.0275 | -0.19 | 0.1594 | 0.3422 | -0.05 | 0.4667 | 0.6891 | 0.05  | 0.0030 | 0.0600 | -0.38 | 0.0199 | 0.1224 | -0.31  | 0.0008 | 0.0345 | -0.71 |
| 3043 Peptidyl-prolyl cis-trans isomerase FKBP3                           | Q00688     | 0.0273              | 0.1001              | 0.23                | 0.1918              | 0.6681              | 0.26                | 0.0151              | 0.0578              | 0.28       | 0.0117 | 0.0434 | 0.32  | 0.4888 | 0.5785 | 0.04  | 0.0122 | 0.0743 | 0.36  | 0.1079 | 0.2682 | 0.19  | 0.0088 | 0.0771 | 0.39   | 0.3636 | 0.4351 | 0.07  |
| 3044 Peptidyl-prolyl cis-trans isomerase FKBP4                           | Q02790     | 0.0092              | 0.0569              | 0.28                | 0.1603              | 0.6643              | 0.27                | 0.0015              | 0.0229              | 0.45       | 0.0104 | 0.0410 | 0.32  | 0.0492 | 0.1634 | 0.17  | 0.0230 | 0.0970 | 0.26  | 0.0668 | 0.2033 | 0.34  | 0.7295 | 1.1746 | -0.03  | 0.0766 | 0.8161 | -0.02 |
| 3045 Peptidyl-prolyl cis-trans isomerase FKBP5                           | P13451     | 0.0211              | 0.0861              | 0.11                | 0.2817              | 0.6642              | 0.19                | 0.0345              | 0.0966              | 0.14       | 0.0012 | 0.0158 | 0.25  | 0.5332 | 0.6187 | 0.02  | 0.0074 | 0.0646 | 0.18  | 0.0135 | 0.1101 | 0.56  | 0.8396 | 1.2837 | -0.02  | 0.6778 | 0.7312 | 0.08  |
| 3046 Peptidyl-prolyl cis-trans isomerase FKBP7                           | Q9Y680     | 0.2193              | 0.3954              | 0.15                | 0.9186              | 0.9439              | 0.01                | 0.0376              | 0.1020              | -0.39      | 0.7571 | 0.7907 | -0.06 | 0.2247 | 0.4333 | -0.14 | 0.7061 | 0.9478 | 0.15  | 0.3736 | 0.4453 | -2.55 | 0.8708 | 0.9320 | -0.33  | 0.0651 | 0.1176 | 2.06  |
| 3047 Peptidyl-prolyl cis-trans isomerase FKBP8                           | Q14318     | 0.2414              | 0.4269              | 0.08                | 0.1383              | 0.6513              | 0.23                | 0.0070              | 0.0400              | 0.24       | 0.1866 | 0.3140 | 0.10  | 0.1850 | 0.3794 | 0.06  | 0.0101 | 0.0700 | 0.24  | 0.0105 | 0.1024 | -0.30 | 0.0017 | 0.0339 | -0.43  | 0.0033 | 0.0578 | -0.41 |
| 3048 Peptidyl-prolyl cis-trans isomerase FKBP9                           | Q95302     | 0.0030              | 0.0365              | -0.08               | 0.1215              | 0.6503              | -0.15               | 0.0004              | 0.0203              | -0.21      | 0.0008 | 0.0150 | -0.25 | 0.0004 | 0.0177 | -0.20 | 0.1683 | 0.3333 | -0.11 | 0.3736 | 0.5101 | -2.55 | 0.8708 | 1.0519 | -0.33  | 0.0651 | 0.1455 | 2.06  |
| 3049 Peptidyl-prolyl cis-trans isomerase H                               | Q43447     | 0.4108              | 0.5419              | -3.31               | 0.5752              | 0.7585              | -1.75               | 0.5661              | 0.6859              | -1.19      | 0.5388 | 0.6488 | 0.89  | 0.2938 | 0.4396 | -1.88 | 0.9510 | 1.0457 | 0.09  | 0.7632 | 0.7987 | 0.06  | 0.3142 | 0.6624 | -0.18  | 0.1940 | 0.2620 | -0.27 |
| 3050 Peptidyl-prolyl cis-trans isomerase NIMA-interacting 1              | P13526     | 0.3503              | 0.5600              | 0.03                | 0.1031              | 0.6449              | 0.14                | 0.0633              | 0.0611              | 0.11       | 0.0633 | 0.1373 | 0.05  | 0.0118 | 0.0781 | 0.08  | 0.1009 | 0.2349 | 0.11  | 0.0689 | 0.2068 | 0.33  | 0.0182 | 0.2800 | 0.35   | 0.0171 | 0.0934 | 0.79  |
| 3051 Peptidyl-prolyl cis-trans isomerase NIMA-interacting 4              | Q9Y237     | 0.0114              | 0.0612              | 0.05                | 0.1604              | 0.6642              | 0.36                | 0.0449              | 0.1161              | 0.22       | 0.0015 | 0.0172 | 0.21  | 0.0008 | 0.0223 | 0.11  | 0.1298 | 0.2806 | 0.10  | 0.3736 | 0.5245 | -2.55 | 0.8708 | 1.0781 | -0.33  | 0.0651 | 0.1524 | 2.06  |
| 3052 Peptidyl-prolyl cis-trans isomerase-like 1                          | Q9Y3C6     | 0.2163              | 0.3915              | -0.10               | 0.5705              | 0.8837              | 0.08                | 0.1272              | 0.2471              | 0.13       | 0.0761 | 0.1579 | 0.17  | 0.5598 | 0.6424 | -0.04 | 0.2266 | 0.4096 | 0.09  | 0.0397 | 0.1640 | 0.42  | 0.2651 | 0.5950 | 0.07   | 0.0412 | 0.1032 | 0.25  |
| 3053 Peptidyl-prolyl isomerase domain and WD repeat-containing protein 1 | Q96BP3     | 0.1822              | 0.3460              | 0.16                | 0.6182              | 0.7172              | -0.07               | 0.5612              | 0.7857              | -0.07      | 0.3354 | 0.5092 | -0.11 | 0.4814 | 0.5713 | -0.08 | 0.7722 | 1.0096 | -0.03 | 0.4882 | 0.5421 | 0.07  | 0.8456 | 1.2883 | 0.02   | 0.1865 | 0.2539 | 0.16  |
| 3054 Peptidyl-rRNA hydrolase 2_mitochondrial                             | Q9Y3E5     | 0.0213              | 0.0869              | -0.17               | 0.0315              | 0.5099              | -0.34               | 0.0333              | 0.0944              | -0.10      | 0.0009 | 0.0147 | -0.32 | 0.0056 | 0.0558 | -0.18 | 0.0784 | 0.2003 | -0.11 | 0.3736 | 0.5445 | -2.55 | 0.8708 | 1      |        |        |        |       |

Supplementary Table S2. Overview on all relatively quantified 5180 proteins statistical analysis

|      |                                                                               |         | MCF-7   |            |        |         | Gen SC20 vs control |        |         |            | SSE SC20 vs control |         |            |        | Dai IC20 vs control |            |        |         | Gen IC20 vs control |        |         |            | SSE IC20 vs control |         |            |        | MDA-MB-231 |            |        |         | Gen IC20 vs control |        |         |            | SSE IC20 vs control |  |  |  |
|------|-------------------------------------------------------------------------------|---------|---------|------------|--------|---------|---------------------|--------|---------|------------|---------------------|---------|------------|--------|---------------------|------------|--------|---------|---------------------|--------|---------|------------|---------------------|---------|------------|--------|------------|------------|--------|---------|---------------------|--------|---------|------------|---------------------|--|--|--|
|      | Protein name                                                                  | UniProt | p value | BH q value | log2FC | p value | BH q value          | log2FC | p value | BH q value | log2FC              | p value | BH q value | log2FC | p value             | BH q value | log2FC | p value | BH q value          | log2FC | p value | BH q value | log2FC              | p value | BH q value | log2FC | p value    | BH q value | log2FC | p value | BH q value          | log2FC | p value | BH q value | log2FC              |  |  |  |
| 3095 | Phosphatidylinositol 3_4_5-trisphosphate-dependent Rac exchanger 1 protein    | Q8TCU6  | 0.0004  | 0.0162     | 0.37   | 0.1310  | 0.6457              | 0.18   | 0.0128  | 0.0532     | 0.23                | 0.0001  | 0.0076     | 0.22   | 0.0000              | 0.0000     | 0.27   | 0.0359  | 0.1224              | 0.27   | 0.3736  | 0.5736     | -2.55               | 0.8708  | 1.1662     | -0.33  | 0.0651     | 0.1778     | 2.06   |         |                     |        |         |            |                     |  |  |  |
| 3096 | Phosphatidylinositol 3_4_5-trisphosphate-dependent Rac exchanger 2 protein    | Q70Z35  | 0.2792  | 0.4728     | -0.04  | 0.4113  | 0.7518              | 0.08   | 0.0431  | 0.1129     | 0.12                | 0.2174  | 0.3554     | 0.05   | 0.0682              | 0.1988     | -0.11  | 0.1344  | 0.2866              | 0.10   | 0.0070  | 0.0865     | 0.36                | 0.8035  | 1.2469     | -0.01  | 0.0366     | 0.1643     | 0.42   |         |                     |        |         |            |                     |  |  |  |
| 3097 | Phosphatidylinositol 3-kinase catalytic subunit type 3                        | Q8NEB9  | 0.7401  | 0.7893     | 0.06   | 0.4103  | 0.7507              | -0.41  | 0.0863  | 0.1831     | -0.52               | 0.2293  | 0.3725     | -0.34  | 0.0422              | 0.1518     | -0.60  | 0.0717  | 0.1890              | -0.80  | 0.3736  | 0.5489     | -2.55               | 0.8708  | 1.1221     | -0.33  | 0.0651     | 0.1646     | 2.06   |         |                     |        |         |            |                     |  |  |  |
| 3098 | Phosphatidylinositol 3-kinase regulatory subunit beta                         | Q00459  | 0.4799  | 0.5546     | 0.15   | 0.3102  | 0.6794              | -0.52  | 0.3650  | 0.5622     | -0.20               | 0.1774  | 0.3017     | -0.34  | 0.6480              | 0.7160     | 0.09   | 0.9358  | 1.1717              | -0.02  | 0.3736  | 0.4322     | -2.55               | 0.8708  | 0.9072     | -0.33  | 0.0651     | 0.1124     | 2.06   |         |                     |        |         |            |                     |  |  |  |
| 3099 | Phosphatidylinositol 4_5-bisphosphate 3-kinase catalytic subunit beta isoform | P42338  | 0.0002  | 0.0136     | 0.34   | 0.1664  | 0.6600              | 0.15   | 0.5974  | 0.6537     | -0.03               | 0.1576  | 0.2754     | 0.04   | 0.0183              | 0.0963     | 0.11   | 0.2331  | 0.4171              | 0.12   | 0.3736  | 0.4942     | -2.55               | 0.8708  | 1.0228     | -0.33  | 0.0651     | 0.1383     | 2.06   |         |                     |        |         |            |                     |  |  |  |
| 3100 | Phosphatidylinositol 4-kinase alpha                                           | P42356  | 0.0171  | 0.0764     | 0.16   | 0.2919  | 0.6696              | 0.11   | 0.0032  | 0.0302     | 0.32                | 0.0498  | 0.1148     | 0.11   | 0.2746              | 0.4991     | 0.05   | 0.0115  | 0.0732              | 0.22   | 0.3726  | 0.6545     | 0.07                | 0.4066  | 0.7924     | -0.06  | 0.4779     | 0.5464     | -0.05  |         |                     |        |         |            |                     |  |  |  |
| 3101 | Phosphatidylinositol 4-kinase type 2-alpha                                    | Q9BTU6  | 0.4108  | 0.5404     | -3.31  | 0.5752  | 0.7566              | -1.75  | 0.5661  | 0.6843     | -1.19               | 0.5388  | 0.6473     | 0.89   | 0.2938              | 0.4383     | -1.88  | 0.9510  | 1.0435              | 0.09   | 0.0089  | 0.0935     | -0.83               | 0.0042  | 0.0526     | -0.94  | 0.0163     | 0.1095     | -0.73  |         |                     |        |         |            |                     |  |  |  |
| 3102 | Phosphatidylinositol 4-phosphate 3-kinase C2 domain-containing subunit alpha  | O00443  | 0.4108  | 0.5402     | -3.31  | 0.5752  | 0.7564              | -1.75  | 0.5661  | 0.6842     | -1.19               | 0.5388  | 0.6471     | 0.89   | 0.2938              | 0.4382     | -1.88  | 0.9510  | 1.0432              | 0.09   | 0.1478  | 0.3329     | 0.36                | 0.0925  | 0.3023     | 0.48   | 0.8138     | 0.8492     | 0.04   |         |                     |        |         |            |                     |  |  |  |
| 3103 | Phosphatidylinositol 4-phosphate 5-kinase type-1 alpha                        | Q99755  | 0.4108  | 0.5401     | -3.31  | 0.5752  | 0.7562              | -1.75  | 0.5661  | 0.6840     | -1.19               | 0.5388  | 0.6470     | 0.89   | 0.2938              | 0.4381     | -1.88  | 0.9510  | 1.0430              | 0.09   | 0.0019  | 0.0526     | 0.87                | 0.0060  | 0.0622     | 0.81   | 0.0129     | 0.0990     | 0.56   |         |                     |        |         |            |                     |  |  |  |
| 3104 | Phosphatidylinositol 5-phosphate 4-kinase type-2 beta                         | P78356  | 0.4108  | 0.5400     | -3.31  | 0.5752  | 0.7560              | -1.75  | 0.5661  | 0.6839     | -1.19               | 0.5388  | 0.6468     | 0.89   | 0.2938              | 0.4380     | -1.88  | 0.9510  | 1.0428              | 0.09   | 0.0258  | 0.1401     | -0.59               | 0.0363  | 0.1738     | -0.85  | 0.1867     | 0.2540     | -0.73  |         |                     |        |         |            |                     |  |  |  |
| 3105 | Phosphatidylinositol 5-phosphate 4-kinase type-2 gamma                        | Q8TBX8  | 0.0058  | 0.0459     | 0.27   | 0.1010  | 0.4350              | 0.23   | 0.0014  | 0.0233     | 0.39                | 0.0030  | 0.0227     | 0.36   | 0.0159              | 0.0900     | 0.30   | 0.0029  | 0.0550              | 0.39   | 0.3736  | 0.6387     | -2.55               | 0.8708  | 1.2800     | -0.33  | 0.0651     | 0.2171     | 2.06   |         |                     |        |         |            |                     |  |  |  |
| 3106 | Phosphatidylinositol transfer protein alpha isoform                           | Q00169  | 0.0031  | 0.0363     | 0.60   | 0.0099  | 0.4459              | 0.46   | 0.4005  | 0.6036     | 0.03                | 0.0874  | 0.1753     | -0.12  | 0.1217              | 0.2872     | 0.09   | 0.2030  | 0.3809              | -0.09  | 0.2190  | 0.4407     | 0.08                | 0.1506  | 0.4185     | 0.13   | 0.2431     | 0.3134     | 0.07   |         |                     |        |         |            |                     |  |  |  |
| 3107 | Phosphatidylinositol transfer protein beta isoform                            | P48739  | 0.3297  | 0.5359     | 0.09   | 0.2795  | 0.6650              | 0.13   | 0.0746  | 0.1637     | 0.21                | 0.1151  | 0.2160     | 0.16   | 0.4048              | 0.5010     | 0.07   | 0.4328  | 0.6538              | 0.10   | 0.1035  | 0.2614     | 0.28                | 0.2678  | 0.5979     | 0.14   | 0.2645     | 0.3364     | 0.14   |         |                     |        |         |            |                     |  |  |  |
| 3108 | Phosphatidylinositol-binding clathrin assembly protein                        | Q13492  | 0.0059  | 0.0464     | 0.19   | 0.0618  | 0.5917              | 0.39   | 0.0112  | 0.0492     | 0.40                | 0.0007  | 0.0136     | 0.33   | 0.0011              | 0.0265     | 0.30   | 0.0081  | 0.0672              | 0.23   | 0.6064  | 0.6541     | 0.05                | 0.4607  | 0.8672     | -0.04  | 0.0355     | 0.1612     | -0.26  |         |                     |        |         |            |                     |  |  |  |
| 3109 | Phosphoenolpyruvate carboxykinase                                             | Q95394  | 0.2792  | 0.4726     | 0.06   | 0.1701  | 0.6610              | 0.19   | 0.0035  | 0.0314     | 0.29                | 0.0013  | 0.0167     | 0.39   | 0.0239              | 0.1119     | 0.22   | 0.0072  | 0.0650              | 0.30   | 0.0065  | 0.0850     | 0.55                | 0.0352  | 0.1707     | 0.24   | 0.0009     | 0.0367     | 0.54   |         |                     |        |         |            |                     |  |  |  |
| 3110 | Phosphoenolpyruvate carboxykinase [GTP]_mitochondrial                         | Q11682  | 0.0019  | 0.0302     | 0.29   | 0.4580  | 0.7903              | 0.06   | 0.0002  | 0.0159     | 0.34                | 0.0000  | 0.0000     | 0.54   | 0.1304              | 0.2987     | -0.05  | 0.0001  | 0.0247              | 0.57   | 0.0286  | 0.1458     | 0.51                | 0.0669  | 0.2490     | 0.17   | 0.0214     | 0.1248     | 0.34   |         |                     |        |         |            |                     |  |  |  |
| 3111 | Phosphoenolpyruvate carboxykinase cytosolic [GTP]                             | P35558  | 0.3613  | 0.5739     | 0.11   | 0.7442  | 0.8147              | 0.04   | 0.0996  | 0.2033     | 0.25                | 0.0914  | 0.1812     | 0.25   | 0.4020              | 0.4982     | 0.10   | 0.0909  | 0.2201              | 0.26   | 0.3736  | 0.5373     | -2.55               | 0.8708  | 1.1013     | -0.33  | 0.0651     | 0.1587     | 2.06   |         |                     |        |         |            |                     |  |  |  |
| 3112 | Phosphoglucosyltransferase                                                    | P36871  | 0.0009  | 0.0216     | 0.93   | 0.0312  | 0.5098              | 0.41   | 0.0095  | 0.0456     | 0.47                | 0.0894  | 0.1782     | 0.37   | 0.0069              | 0.0602     | 0.64   | 0.0071  | 0.0649              | 0.65   | 0.1601  | 0.3532     | 0.12                | 0.5851  | 1.0171     | -0.04  | 0.0563     | 0.2107     | -0.18  |         |                     |        |         |            |                     |  |  |  |
| 3113 | Phosphoglucomutase-2                                                          | Q96G03  | 0.5119  | 0.5846     | 0.04   | 0.8116  | 0.8647              | 0.02   | 0.5138  | 0.7346     | 0.03                | 0.8688  | 0.8875     | 0.01   | 0.1261              | 0.2929     | -0.10  | 0.3014  | 0.4994              | 0.06   | 0.0071  | 0.0867     | 0.28                | 0.0333  | 0.1651     | 0.18   | 0.0241     | 0.1324     | 0.21   |         |                     |        |         |            |                     |  |  |  |
| 3114 | Phosphoglycerate kinase 1                                                     | P00558  | 0.0002  | 0.0135     | 0.45   | 0.0517  | 0.5772              | 0.24   | 0.0005  | 0.0212     | 0.38                | 0.0022  | 0.0205     | 0.28   | 0.1741              | 0.3631     | 0.05   | 0.0045  | 0.0598              | 0.34   | 0.9739  | 0.9790     | 0.00                | 0.0136  | 0.0973     | -0.39  | 0.0165     | 0.1101     | -0.48  |         |                     |        |         |            |                     |  |  |  |
| 3115 | Phosphoglycerate kinase 2                                                     | P07205  | 0.5998  | 0.6656     | -0.04  | 0.1693  | 0.6614              | -0.13  | 0.6982  | 0.7457     | -0.03               | 0.5163  | 0.7215     | 0.06   | 0.8876              | 0.9139     | -0.01  | 0.0607  | 0.1709              | 0.34   | 0.6442  | 0.6889     | -0.03               | 0.6738  | 1.1130     | 0.03   | 0.8602     | 0.8867     | 0.01   |         |                     |        |         |            |                     |  |  |  |
| 3116 | Phosphoglycerate mutase 1                                                     | P18669  | 0.0051  | 0.0437     | 0.18   | 0.2280  | 0.6602              | 0.24   | 0.0017  | 0.0235     | 0.26                | 0.0019  | 0.0195     | 0.17   | 0.1908              | 0.3871     | -0.03  | 0.0250  | 0.1005              | 0.19   | 0.2701  | 0.5131     | 0.14                | 0.2431  | 0.5614     | -0.10  | 0.4813     | 0.5496     | -0.04  |         |                     |        |         |            |                     |  |  |  |
| 3117 | Phosphoglycerate mutase 2                                                     | P15259  | 0.1501  | 0.2995     | -0.45  | 0.2863  | 0.6671              | -1.21  | 0.3189  | 0.5063     | -0.29               | 0.5589  | 0.6098     | -0.15  | 0.1989              | 0.6070     | -0.18  | 0.2770  | 0.4723              | -0.33  | 0.0007  | 0.0417     | -1.05               | 0.0003  | 0.0213     | -0.71  | 0.4476     | 0.5173     | -0.09  |         |                     |        |         |            |                     |  |  |  |
| 3118 | Phosphoinositide 3-kinase adapter protein 1                                   | Q6ZUJ8  | 0.4108  | 0.5398     | -3.31  | 0.5752  | 0.7558              | -1.75  | 0.5661  | 0.6837     | -1.19               | 0.5388  | 0.6467     | 0.89   | 0.2938              | 0.4378     | -1.88  | 0.9510  | 1.0426              | 0.09   | 0.0003  | 0.0338     | 10.14               | 0.8708  | 1.3120     | -0.33  | 0.0027     | 0.0542     | 9.75   |         |                     |        |         |            |                     |  |  |  |
| 3119 | Phosphoinositide 3-kinase regulatory subunit 6                                | Q5UJ93  | 0.4108  | 0.5397     | -3.31  | 0.5752  | 0.7557              | -1.75  | 0.5661  | 0.6835     | -1.19               | 0.5388  | 0.6465     | 0.89   | 0.2938              | 0.4377     | -1.88  | 0.9510  | 1.0423              | 0.09   | 0.0475  | 0.1745     | 0.49                | 0.2548  | 0.5794     | 0.06   | 0.1849     | 0.2523     | 0.06   |         |                     |        |         |            |                     |  |  |  |
| 3120 | Phospholipase A2-activating protein                                           | Q9Y263  | 0.3116  | 0.5127     | 0.04   | 0.3707  | 0.7186              | 0.11   | 0.0199  | 0.0680     | 0.13                | 0.5367  | 0.7443     | 0.03   | 0.0651              | 0.1944     | -0.09  | 0.2192  | 0.4007              | 0.05   | 0.1119  | 0.2754     | 0.33                | 0.3340  | 0.6912     | -0.09  | 0.2428     | 0.3131     | -0.09  |         |                     |        |         |            |                     |  |  |  |
| 3121 | Phospholipase D1                                                              | Q13393  | 0.0996  | 0.2243     | 0.24   | 0.6805  | 0.7665              | 0.03   | 0.9619  | 0.9690     | 0.00                | 0.3203  | 0.4913     | -0.16  | 0.1079              | 0.2662     | 0.17   | 0.7150  | 0.9551              | -0.04  | 0.2358  | 0.4653     | 0.08                | 0.7467  | 1.1879     | -0.03  | 0.1834     | 0.2509     | 0.16   |         |                     |        |         |            |                     |  |  |  |
| 3122 | Phospholipase D2                                                              | Q14939  | 0.7329  | 0.7828     | -0.03  | 0.2437  | 0.6585              | 0.16   | 0.9428  | 0.9553     | 0.00                | 0.6429  | 0.6872     | -0.04  | 0.3432              | 0.4400     | 0.09   | 0.7405  | 0.9803              | 0.03   | 0.3736  | 0.4425     | -2.55               | 0.8708  | 0.9268     | -0.33  | 0.0651     | 0.1165     | 2.06   |         |                     |        |         |            |                     |  |  |  |
| 3123 | Phospholipase DDHD2                                                           | Q94K30  | 0.2688  | 0.4607     | 0.09   | 0.0121  | 0.4353              | 0.43   | 0.0123  | 0.0521     | 0.34                | 0.0006  | 0.0126     | 0.76   | 0.0013              | 0.0284     | 0.80   | 0.0027  | 0.0562              | 0.63   | 0.1115  | 0.2749     | 0.22                | 0.3828  | 0.7612     | -0.14  | 0.2600     |            |        |         |                     |        |         |            |                     |  |  |  |

Supplementary Table S2. Overview on all relatively quantified 5180 proteins statistical analysis

| Protein name                                                        | UniProt    | MCF-7               |            |                     |         | MDA-MB-231          |        |                     |            |
|---------------------------------------------------------------------|------------|---------------------|------------|---------------------|---------|---------------------|--------|---------------------|------------|
|                                                                     |            | Dai SC20 vs control |            | Gen SC20 vs control |         | Dai IC20 vs control |        | Gen IC20 vs control |            |
|                                                                     |            | p value             | BH q value | log2FC              | p value | BH q value          | log2FC | p value             | BH q value |
| 3163 Platelet-activating factor acetylhydrolase IB subunit alpha    | P43034     | 0.0142              | 0.0694     | 0.19                | 0.2136  | 0.6625              | 0.19   | 0.0088              | 0.0439     |
| 3164 Platelet-activating factor acetylhydrolase IB subunit gamma    | Q15102     | 0.6184              | 0.6820     | 0.04                | 0.1963  | 0.6690              | 0.28   | 0.1332              | 0.2554     |
| 3165 Platelet-derived growth factor receptor alpha                  | P16234     | 0.9943              | 0.9951     | 0.00                | 0.9433  | 0.9624              | 0.03   | 0.1013              | 0.2061     |
| 3166 Pleckstrin homology domain-containing family A member 1        | Q9HB21     | 0.3885              | 0.6052     | 0.09                | 0.9644  | 0.9757              | -0.01  | 0.1420              | 0.2679     |
| 3167 Pleckstrin homology domain-containing family B member 1        | Q9UF11     | 0.0028              | 0.0355     | -0.94               | 0.5963  | 0.7006              | -0.11  | 0.0087              | 0.0437     |
| 3168 Pleckstrin homology domain-containing family G member 3        | A1L390     | 0.2469              | 0.4327     | 0.07                | 0.2720  | 0.6652              | 0.19   | 0.0528              | 0.1300     |
| 3169 Pleckstrin homology domain-containing family G member 4B       | Q96PX9     | 0.4108              | 0.5382     | -3.31               | 0.5752  | 0.7535              | -1.75  | 0.5661              | 0.6818     |
| 3170 Pleckstrin homology domain-containing family H member 1        | Q9ULM0     | 0.4108              | 0.5380     | -3.31               | 0.5752  | 0.7534              | -1.75  | 0.5661              | 0.6816     |
| 3171 Pleckstrin homology domain-containing family H member 2        | Q8IVE3     | 0.3869              | 0.6037     | 0.20                | 0.3948  | 0.7383              | -0.07  | 0.8241              | 0.8581     |
| 3172 Pleckstrin homology domain-containing family H member 3        | Q7Z736     | 0.0128              | 0.0662     | -0.21               | 0.1737  | 0.6611              | 0.25   | 0.6114              | 0.6663     |
| 3173 Pleckstrin homology domain-containing family M member 1        | Q9Y4G2     | 0.6430              | 0.7048     | -0.02               | 0.0656  | 0.5951              | 0.09   | 0.1376              | 0.2614     |
| 3174 Pleckstrin homology-like domain family B member 2              | Q86S00     | 0.0128              | 0.0661     | 0.22                | 0.2898  | 0.6687              | 0.21   | 0.0931              | 0.1932     |
| 3175 Pleckstrin-2                                                   | Q9NYT0     | 0.4108              | 0.5379     | -3.31               | 0.5752  | 0.7532              | -1.75  | 0.5661              | 0.6815     |
| 3176 Plectin                                                        | Q15149     | 0.0358              | 0.1183     | 0.20                | 0.1912  | 0.6683              | 0.28   | 0.0043              | 0.0324     |
| 3177 Plexin-A1                                                      | Q9UIW2     | 0.4108              | 0.5378     | -3.31               | 0.5752  | 0.7530              | -1.75  | 0.5661              | 0.6813     |
| 3178 Plexin-A3                                                      | P51805     | 0.4108              | 0.5376     | -3.31               | 0.5752  | 0.7528              | -1.75  | 0.5661              | 0.6812     |
| 3179 PMS1 protein homolog 1                                         | P54277     | 0.0015              | 0.0263     | -0.42               | 0.5211  | 0.8412              | -0.05  | 0.0432              | 0.1129     |
| 3180 Poly [ADP-ribose] polymerase 1                                 | P09874     | 0.0517              | 0.1471     | 0.16                | 0.2209  | 0.6599              | 0.19   | 0.0034              | 0.0310     |
| 3181 Poly [ADP-ribose] polymerase 2                                 | Q9UGN5     | 0.1885              | 0.3544     | 0.04                | 0.2205  | 0.7590              | -0.04  | 0.1120              | 0.2235     |
| 3182 Poly(A) polymerase alpha                                       | P51003     | 0.1335              | 0.2766     | 0.08                | 0.1702  | 0.6609              | 0.14   | 0.0325              | 0.0927     |
| 3183 Poly(A) polymerase beta                                        | Q9NRJ5     | 0.6273              | 0.6902     | -0.04               | 0.5537  | 0.8691              | -0.15  | 0.0039              | 0.0314     |
| 3184 Poly(A) RNA polymerase mitochondrial                           | Q9NVV4     | 0.5611              | 0.6297     | 0.01                | 0.2110  | 0.6624              | 0.20   | 0.0557              | 0.1348     |
| 3185 Poly(A)-specific ribonuclease PARN                             | O95453     | 0.4108              | 0.5375     | -3.31               | 0.5752  | 0.7526              | -1.75  | 0.5661              | 0.6810     |
| 3186 Poly(C)-binding protein 1                                      | Q15365     | 0.0048              | 0.0435     | 0.19                | 0.3007  | 0.6737              | 0.22   | 0.0053              | 0.0311     |
| 3187 Poly(C)-binding protein 2                                      | Q15366     | 0.0008              | 0.0205     | 0.43                | 0.2999  | 0.6731              | -0.15  | 0.0234              | 0.0753     |
| 3188 Poly(C)-binding protein 4                                      | P57723     | 0.0142              | 0.0693     | -0.59               | 0.2659  | 0.6628              | -0.30  | 0.0492              | 0.1236     |
| 3189 Poly(U)-binding splicing factor PUF60                          | Q9UIHX1    | 0.8118              | 0.8485     | 0.01                | 0.2575  | 0.6623              | -0.09  | 0.0755              | 0.1653     |
| 3190 Polyadenylate-binding protein 1                                | P11940     | 0.0102              | 0.0589     | 0.32                | 0.4251  | 0.7617              | 0.13   | 0.0360              | 0.0992     |
| 3191 Polyadenylate-binding protein 1-like                           | Q4VXU2     | 0.3026              | 0.5021     | 0.08                | 0.3287  | 0.6882              | 0.10   | 0.7953              | 0.8326     |
| 3192 Polyadenylate-binding protein 1-like 2                         | Q5JQF8     | 0.0584              | 0.1593     | 0.08                | 0.0949  | 0.6319              | 0.32   | 0.0065              | 0.0390     |
| 3193 Polyadenylate-binding protein 3                                | Q9H361     | 0.9421              | 0.9567     | 0.04                | 0.9472  | 0.9653              | -0.02  | 0.0249              | 0.0782     |
| 3194 Polyadenylate-binding protein 4                                | Q13310     | 0.0019              | 0.0301     | -0.68               | 0.1974  | 0.6710              | -0.38  | 0.0013              | 0.0229     |
| 3195 Polyadenylate-binding protein 4-like                           | POCB38     | 0.0005              | 0.0180     | 0.34                | 0.1017  | 0.6309              | 0.25   | 0.8705              | 0.8975     |
| 3196 Polyadenylate-binding protein 5                                | Q96DU9     | 0.7969              | 0.8356     | -0.02               | 0.2960  | 0.6716              | 0.11   | 0.4980              | 0.7202     |
| 3197 Polyadenylate-binding protein-interacting protein 1            | Q9H074     | 0.5491              | 0.6183     | 0.04                | 0.5630  | 0.9301              | 0.16   | 0.8537              | 0.8832     |
| 3198 Polyamine-modulated factor 1-binding protein 1                 | Q8TBY8     | 0.4172              | 0.4949     | 0.04                | 0.0548  | 0.5853              | 0.31   | 0.0159              | 0.0596     |
| 3199 Polycomb protein SCMH1                                         | Q96GD3     | 0.4108              | 0.5374     | -3.31               | 0.5752  | 0.7524              | -1.75  | 0.5661              | 0.6808     |
| 3200 Polyclin-2                                                     | Q13563     | 0.0887              | 0.2077     | 0.19                | 0.3541  | 0.7057              | -0.13  | 0.1610              | 0.2959     |
| 3201 Polyubiquitin-binding protein 1                                | Q60828     | 0.4108              | 0.5372     | -3.31               | 0.5752  | 0.7522              | -1.75  | 0.5661              | 0.6807     |
| 3202 Polyubiquitin-interacting protein 2                            | Q9Y257     | 0.0266              | 0.0987     | -0.05               | 0.2442  | 0.6571              | 0.16   | 0.0929              | 0.1930     |
| 3203 Polymeric immunoglobulin receptor                              | P01833     | 0.1493              | 0.2984     | 0.04                | 0.4983  | 0.8207              | 0.04   | 0.0367              | 0.1005     |
| 3204 Polypeptide N-acetylgalactosaminyltransferase 11               | Q8NCW6     | 0.0246              | 0.0947     | 0.13                | 0.5060  | 0.8279              | 0.12   | 0.0028              | 0.0289     |
| 3205 Polypeptide N-acetylgalactosaminyltransferase 2                | Q10471     | 0.1749              | 0.3367     | 0.08                | 0.4068  | 0.8279              | 0.07   | 0.2277              | 0.3868     |
| 3206 Polypeptide N-acetylgalactosaminyltransferase 3                | Q14435     | 0.0622              | 0.1654     | -1.37               | 0.2309  | 0.6841              | -0.99  | 0.0841              | 0.1795     |
| 3207 Polypeptide N-acetylgalactosaminyltransferase 4                | Q8N4A0     | 0.4108              | 0.5371     | -3.31               | 0.5752  | 0.7520              | -1.75  | 0.5661              | 0.6805     |
| 3208 Polypeptide N-acetylgalactosaminyltransferase 6                | Q8NCL4     | 0.3486              | 0.5578     | -0.10               | 0.4789  | 0.8046              | 0.06   | 0.4983              | 0.7204     |
| 3209 Polypyrimidine tract-binding protein 1                         | P26599     | 0.1666              | 0.3246     | -0.03               | 0.0771  | 0.6116              | -0.09  | 0.2113              | 0.3659     |
| 3210 Polypyrimidine tract-binding protein 2                         | Q9UKA9     | 0.5089              | 0.5818     | -0.02               | 0.1795  | 0.6637              | -0.21  | 0.0007              | 0.0205     |
| 3211 Polypyrimidine tract-binding protein 3                         | Q95758     | 0.1443              | 0.2913     | -0.07               | 0.1063  | 0.6307              | -0.24  | 0.0007              | 0.0208     |
| 3212 Polyrhombic nucleotide nucleotidyltransferase 1, mitochondrial | Q8TCS8     | 0.0347              | 0.1166     | 0.23                | 0.2826  | 0.6645              | 0.17   | 0.0070              | 0.0397     |
| 3213 Porphobilinogen deaminase                                      | P08397     | 0.0012              | 0.0240     | 0.14                | 0.4475  | 0.7823              | 0.13   | 0.0267              | 0.0817     |
| 3214 Potassium voltage-gated channel subfamily A member 2           | P16389     | 0.0050              | 0.0434     | 0.98                | 0.9215  | 0.9458              | -0.04  | 0.0491              | 0.6271     |
| 3215 Potassium voltage-gated channel subfamily A member 5           | P22460     | 0.0009              | 0.0245     | -1.02               | 0.0219  | 0.4455              | -0.52  | 0.0042              | 0.0264     |
| 3216 Potassium voltage-gated channel subfamily G member 3           | Q8TAE7     | 0.0791              | 0.1928     | -0.68               | 0.2339  | 0.6614              | -0.71  | 0.0305              | 0.0889     |
| 3217 Potassium-transporting ATPase alpha chain 1                    | P20648     | 0.0555              | 0.1539     | 0.10                | 0.7870  | 0.8465              | -0.04  | 0.3218              | 0.5093     |
| 3218 Potassium-transporting ATPase alpha chain 2                    | P54707     | 0.0073              | 0.0502     | 0.18                | 0.2633  | 0.6637              | 0.26   | 0.0162              | 0.0602     |
| 3219 POTE ankyrin domain family member A                            | Q6S8U7     | 0.0225              | 0.0894     | 0.17                | 0.8987  | 0.9281              | -0.01  | 0.0179              | 0.0636     |
| 3220 POTE ankyrin domain family member E                            | Q6S8U3     | 0.5263              | 0.5977     | 0.06                | 0.1772  | 0.6707              | 0.10   | 0.6036              | 0.6595     |
| 3221 POTE ankyrin domain family member F                            | ASA3E0     | 0.0024              | 0.0232     | 0.20                | 0.0581  | 0.5878              | 0.20   | 0.0004              | 0.0230     |
| 3222 POTE ankyrin domain family member I                            | POCC38     | 0.0015              | 0.0362     | 0.29                | 0.2855  | 0.6652              | 0.22   | 0.0285              | 0.0855     |
| 3223 POTE ankyrin domain family member J                            | POCC39     | 0.4108              | 0.5370     | -3.31               | 0.5752  | 0.7518              | -1.75  | 0.5661              | 0.6804     |
| 3224 PR domain zinc finger protein 4                                | Q9UKN5     | 0.6974              | 0.7518     | -0.05               | 0.0312  | 0.0882              | 0.26   | 0.5070              | 0.7285     |
| 3225 PRAI family protein 2                                          | O60831     | 0.3293              | 0.5359     | -0.13               | 0.0295  | 0.5077              | -0.44  | 0.0236              | 0.0755     |
| 3226 PRAI family protein 3                                          | O75915     | 0.0166              | 0.0752     | -0.25               | 0.3346  | 0.6933              | -0.17  | 0.0064              | 0.0386     |
| 3227 PRAME family member 17                                         | Q5VTA0     | 0.0511              | 0.1463     | -0.21               | 0.3927  | 0.7365              | -0.27  | 0.9967              | 0.9973     |
| 3228 PRAME family member 18                                         | Q5VWM3     | 0.0052              | 0.0440     | 0.50                | 0.0041  | 0.3371              | 0.47   | 0.0059              | 0.0374     |
| 3229 PRAME family member 19                                         | Q5WSL8     | 0.4108              | 0.5368     | -3.31               | 0.5752  | 0.7516              | -1.75  | 0.5661              | 0.6802     |
| 3230 PRAME family member 2                                          | O60811     | 0.4108              | 0.5367     | -3.31               | 0.5752  | 0.7515              | -1.75  | 0.5661              | 0.6801     |
| 3231 PRAME family member 33                                         | AOA0G2JMD5 | 0.0776              | 0.1907     | 0.53                | 0.0776  | 0.6118              | 0.30   | 0.0022              | 0.0267     |
| 3232 Pre-B-cell leukemia transcription factor 1                     | P40424     | 0.7417              | 0.7905     | 0.03                | 0.9854  | 0.9896              | 0.00   | 0.0102              | 0.0470     |
| 3233 Pre-B-cell leukemia transcription factor 4                     | Q9BYU1     | 0.4108              | 0.5365     | -3.31               | 0.5752  | 0.7513              | -1.75  | 0.5661              | 0.6799     |
| 3234 Prefoldin subunit 1                                            | O60925     | 0.2616              | 0.4514     | -0.04               | 0.5739  | 0.8858              | 0.05   | 0.4159              | 0.6228     |
| 3235 Prefoldin subunit 2                                            | Q9UHV9     | 0.0317              | 0.1104     | 0.18                | 0.4778  | 0.8036              | 0.16   | 0.0088              | 0.0438     |

Supplementary Table S2. Overview on all relatively quantified 5180 proteins statistical analysis

| Protein name                                                                  | UniProt    | MCF-7               |                     |                     |                     | MDA-MB-231          |                     |                     |                     |            |        |        |       |        |        |       |        |        |       |        |        |       |        |        |       |        |        |       |
|-------------------------------------------------------------------------------|------------|---------------------|---------------------|---------------------|---------------------|---------------------|---------------------|---------------------|---------------------|------------|--------|--------|-------|--------|--------|-------|--------|--------|-------|--------|--------|-------|--------|--------|-------|--------|--------|-------|
|                                                                               |            | Dai SC20 vs control | Gen SC20 vs control | SSE SC20 vs control | Dai IC20 vs control | Gen IC20 vs control | SSE IC20 vs control | Dai IC20 vs control | Gen IC20 vs control |            |        |        |       |        |        |       |        |        |       |        |        |       |        |        |       |        |        |       |
| p value                                                                       | BH q value | log2FC              | p value             | BH q value          | log2FC              | p value             | BH q value          | log2FC              | p value             | BH q value | log2FC |        |       |        |        |       |        |        |       |        |        |       |        |        |       |        |        |       |
| 3236 Prefoldin subunit 3                                                      | P61758     | 0.1671              | 0.3252              | 0.04                | 0.2549              | 0.6618              | 0.17                | 0.0567              | 0.1362              | 0.13       | 0.0336 | 0.0870 | 0.16  | 0.0004 | 0.0161 | 0.10  | 0.0006 | 0.0420 | 0.12  | 0.9134 | 0.9294 | 0.01  | 0.0146 | 0.1012 | -0.30 | 0.0108 | 0.0908 | -0.38 |
| 3237 Prefoldin subunit 4                                                      | Q9NQP4     | 0.0826              | 0.1979              | 0.08                | 0.5494              | 0.7087              | 0.04                | 0.0020              | 0.0248              | 0.33       | 0.0013 | 0.0168 | 0.29  | 0.2421 | 0.4559 | 0.04  | 0.0144 | 0.0799 | 0.17  | 0.2079 | 0.4233 | 0.16  | 0.0548 | 0.2240 | -0.23 | 0.2662 | 0.3377 | -0.09 |
| 3238 Prefoldin subunit 5                                                      | Q9Y471     | 0.0157              | 0.0728              | 0.21                | 0.2103              | 0.6622              | 0.26                | 0.0035              | 0.0313              | 0.35       | 0.0024 | 0.0210 | 0.33  | 0.3277 | 0.4249 | 0.03  | 0.0052 | 0.0568 | 0.23  | 0.2568 | 0.4956 | 0.09  | 0.8080 | 1.2513 | -0.01 | 0.0976 | 0.1528 | -0.01 |
| 3239 Prefoldin subunit 6                                                      | Q15212     | 0.8135              | 0.8501              | 0.01                | 0.2735              | 0.6642              | 0.13                | 0.0126              | 0.0525              | 0.18       | 0.0557 | 0.1248 | 0.11  | 0.3894 | 0.4865 | 0.03  | 0.0891 | 0.2177 | 0.09  | 0.0276 | 0.1438 | 0.18  | 0.0233 | 0.1346 | 0.17  | 0.2509 | 0.1342 | 0.21  |
| 3240 Pregnancy-specific beta-1-glycoprotein 5                                 | Q15238     | 0.0974              | 0.2708              | 0.17                | 0.0018              | 0.2230              | -0.62               | 0.0301              | 0.0881              | -0.26      | 0.0485 | 0.1127 | -0.34 | 0.0128 | 0.0807 | -0.38 | 0.5428 | 0.7746 | -0.05 | 0.3736 | 0.4573 | -2.55 | 0.8708 | 0.9545 | -0.33 | 0.0651 | 0.1224 | 0.06  |
| 3241 Pregnancy-specific beta-1-glycoprotein 9                                 | Q00887     | 0.0229              | 0.0903              | 0.17                | 0.0389              | 0.5582              | 0.14                | 0.0042              | 0.0252              | 0.30       | 0.1333 | 0.2410 | 0.17  | 0.2303 | 0.4402 | 0.07  | 0.2727 | 0.4668 | 0.14  | 0.3102 | 0.5706 | 0.12  | 0.1398 | 0.3970 | -0.25 | 0.0278 | 0.1430 | -0.43 |
| 3242 Prelamin-A/C                                                             | P02545     | 0.9035              | 0.9252              | 0.01                | 0.6599              | 0.7490              | 0.09                | 0.1007              | 0.0350              | 0.17       | 0.9741 | 0.9777 | 0.00  | 1.903  | 3.864  | -0.12 | 0.0615 | 0.1724 | 0.24  | 0.0114 | 0.1040 | 0.77  | 0.0501 | 0.2105 | 0.29  | 0.0054 | 0.0706 | 0.06  |
| 3243 Pre-mRNA 3' end processing protein WDR33                                 | Q9C0U8     | 0.4108              | 0.5364              | -3.31               | 0.5752              | 0.7511              | -1.75               | 0.5661              | 0.6797              | -1.19      | 0.5388 | 0.6429 | 0.89  | 0.2938 | 0.4347 | -1.88 | 0.9510 | 1.0371 | 0.09  | 0.0956 | 0.2490 | 0.53  | 0.7367 | 1.1804 | -0.05 | 0.3292 | 0.4004 | 0.16  |
| 3244 Pre-mRNA-processing factor 17                                            | O60508     | 0.4108              | 0.5363              | -3.31               | 0.5752              | 0.7509              | -1.75               | 0.5661              | 0.6796              | -1.19      | 0.5388 | 0.6428 | 0.89  | 0.2938 | 0.4346 | -1.88 | 0.9510 | 1.0369 | 0.09  | 0.0011 | 0.0422 | 1.25  | 0.0002 | 0.0185 | 1.13  | 0.0030 | 0.0557 | 1.06  |
| 3245 Pre-mRNA-processing factor 19                                            | Q9UM54     | 0.1166              | 0.2506              | 0.08                | 0.5391              | 0.8548              | 0.11                | 0.0228              | 0.0743              | 0.15       | 0.0062 | 0.0315 | 0.22  | 0.0223 | 0.1077 | -0.19 | 0.0547 | 0.1589 | 0.13  | 0.0695 | 0.2075 | 0.20  | 0.6880 | 1.1299 | 0.03  | 0.2922 | 0.3640 | 0.09  |
| 3246 Pre-mRNA-processing factor 40 homolog A                                  | O75400     | 0.9070              | 0.9276              | 0.01                | 0.3968              | 0.7407              | -0.08               | 0.0393              | 0.1052              | 0.21       | 0.4714 | 0.6710 | 0.05  | 0.4884 | 0.5781 | -0.05 | 0.5398 | 0.7718 | 0.07  | 0.0502 | 0.1784 | 0.17  | 0.0005 | 0.0211 | -0.15 | 0.0271 | 0.1407 | -0.07 |
| 3247 Pre-mRNA-processing factor 40 homolog B                                  | Q6NWY9     | 0.0137              | 0.0685              | -0.14               | 0.5203              | 0.8409              | -0.08               | 0.0206              | 0.0692              | 0.20       | 0.3456 | 0.5213 | -0.03 | 0.0187 | 0.0975 | 0.17  | 0.0021 | 0.0536 | 0.45  | 0.0031 | 0.0615 | 0.18  | 0.8838 | 1.334  | 0.18  | 0.8838 | 1.334  | 0.18  |
| 3248 Pre-mRNA-processing factor 6                                             | O94906     | 0.0084              | 0.0543              | -0.51               | 0.0553              | 0.5846              | -0.28               | 0.7613              | 0.8022              | 0.03       | 0.0074 | 0.0348 | -0.53 | 0.0022 | 0.0366 | -0.86 | 0.0093 | 0.0692 | -0.58 | 0.1334 | 0.3106 | 0.18  | 0.8838 | 1.334  | 0.18  | 0.8838 | 1.334  | 0.18  |
| 3249 Pre-mRNA-processing-splicing factor 8                                    | Q6P2Q9     | 0.4108              | 0.5361              | -3.31               | 0.5752              | 0.7507              | -1.75               | 0.5661              | 0.6794              | -1.19      | 0.5388 | 0.6426 | 0.89  | 0.2938 | 0.4345 | -1.88 | 0.9510 | 1.0367 | 0.09  | 0.0561 | 0.1875 | 0.33  | 0.0011 | 0.0278 | 0.33  | 0.0095 | 0.0874 | 0.19  |
| 3250 Pre-mRNA-splicing factor 38B                                             | Q5VTL8     | 0.0844              | 0.2005              | -0.12               | 0.1984              | 0.6656              | -0.75               | 0.0982              | 0.2013              | 0.11       | 0.1857 | 0.3129 | 0.08  | 0.0245 | 0.1132 | -0.24 | 0.0071 | 0.0646 | -0.52 | 0.0935 | 0.2454 | -0.30 | 0.0501 | 0.0569 | -0.23 | 0.0293 | 0.1464 | -0.24 |
| 3251 Pre-mRNA-splicing factor ATP-dependent RNA helicase DHX15                | O43143     | 0.7996              | 0.8376              | 0.02                | 0.8575              | 0.8970              | 0.01                | 0.8886              | 0.9115              | -0.01      | 0.1275 | 0.2330 | -0.11 | 0.0370 | 0.1399 | -0.20 | 0.6867 | 1.1048 | -0.01 | 0.0006 | 0.0398 | 0.65  | 0.0056 | 0.0607 | 0.42  | 0.0022 | 0.0520 | 0.46  |
| 3252 Pre-mRNA-splicing factor ATP-dependent RNA helicase PRP16                | Q9V620     | 0.4108              | 0.5360              | -3.31               | 0.5752              | 0.7505              | -1.75               | 0.5661              | 0.6793              | -1.19      | 0.5388 | 0.6425 | 0.89  | 0.2938 | 0.4343 | -1.88 | 0.9510 | 1.0364 | 0.09  | 0.3091 | 0.5696 | -0.77 | 0.3650 | 0.7345 | -0.66 | 0.4307 | 0.5021 | -0.56 |
| 3253 Pre-mRNA-splicing factor SLU7                                            | O95391     | 0.4108              | 0.5359              | -3.31               | 0.5752              | 0.7503              | -1.75               | 0.5661              | 0.6791              | -1.19      | 0.5388 | 0.6423 | 0.89  | 0.2938 | 0.4342 | -1.88 | 0.9510 | 1.0362 | 0.09  | 0.0195 | 0.1290 | 0.91  | 0.0030 | 0.0453 | 0.81  | 0.1620 | 0.2264 | -0.09 |
| 3254 Pre-mRNA-splicing factor SPF27                                           | O75934     | 0.3393              | 0.5472              | -0.08               | 0.1423              | 0.6546              | -0.19               | 0.2287              | 0.3882              | -0.11      | 0.1232 | 0.2261 | -0.16 | 0.0359 | 0.1374 | -0.31 | 0.3764 | 0.5853 | -0.07 | 0.3736 | 0.4712 | -2.55 | 0.8708 | 0.9804 | -0.33 | 0.0651 | 0.1283 | 0.06  |
| 3255 Pre-mRNA-splicing factor 1                                               | Q0U1G3     | 0.9483              | 0.9613              | 0.01                | 0.4081              | 0.7494              | 0.12                | 0.3627              | 0.5603              | 0.12       | 0.1833 | 0.3099 | 0.21  | 0.0780 | 0.2100 | 0.34  | 0.1259 | 0.2744 | 0.26  | 0.0006 | 0.0414 | 0.68  | 0.0005 | 0.0242 | 1.01  | 0.0077 | 0.0498 | 0.90  |
| 3256 Pre-mRNA-splicing factor TSR1 homolog                                    | Q2NL82     | 0.2876              | 0.4840              | -0.07               | 0.5846              | 0.6914              | 0.06                | 0.1963              | 0.3457              | 0.10       | 0.2035 | 0.3370 | 0.10  | 0.1615 | 0.3444 | -0.11 | 0.1523 | 0.3097 | -0.11 | 0.0958 | 0.2490 | 0.19  | 0.0326 | 0.1627 | -0.15 | 0.5061 | 0.5728 | -0.04 |
| 3257 Pre-mRNA-splicing factor TSR2 homolog                                    | Q9P6E8     | 0.4108              | 0.5357              | -3.31               | 0.5752              | 0.7501              | -1.75               | 0.5661              | 0.6790              | -1.19      | 0.5388 | 0.6422 | 0.89  | 0.2938 | 0.4341 | -1.88 | 0.9510 | 1.0360 | 0.09  | 0.0489 | 0.1770 | -0.54 | 0.0121 | 0.0920 | -0.56 | 0.4009 | 0.4923 | -0.10 |
| 3258 Pre-mRNA-splicing factor 1                                               | Q5JRX3     | 0.0663              | 0.1705              | 0.08                | 0.6008              | 0.7044              | 0.06                | 0.0007              | 0.0199              | 0.60       | 0.0094 | 0.0395 | 0.16  | 0.3559 | 0.4536 | 0.03  | 0.0060 | 0.0618 | 0.26  | 0.3448 | 0.6176 | 0.10  | 0.7171 | 1.1626 | -0.03 | 0.0835 | 0.1352 | -0.12 |
| 3259 Prior-like protein doppel                                                | Q9UKY0     | 0.1346              | 0.2781              | 0.40                | 0.5004              | 0.8229              | -0.14               | 0.1578              | 0.2912              | 0.36       | 0.1699 | 0.2915 | 0.34  | 0.0173 | 0.0944 | 0.88  | 0.0227 | 0.0965 | 0.90  | 0.3736 | 0.5895 | -2.55 | 0.8708 | 1.1943 | -0.33 | 0.0651 | 0.1867 | 0.06  |
| 3260 PRK2 apoptosis WT1 regulator protein                                     | Q961Z0     | 0.3419              | 0.5495              | 0.05                | 0.0548              | 0.5865              | 0.30                | 0.0015              | 0.0232              | 0.34       | 0.0150 | 0.0503 | 0.25  | 0.0046 | 0.0504 | 0.25  | 0.0234 | 0.0982 | 0.21  | 0.1610 | 0.3541 | 0.13  | 0.1026 | 0.3229 | 0.06  | 0.0007 | 0.0318 | 0.22  |
| 3261 PRK2-interacting protein 1                                               | Q9H875     | 0.0013              | 0.0246              | -0.34               | 0.0474              | 0.6656              | -0.75               | 0.0982              | 0.2013              | 0.11       | 0.1857 | 0.3129 | 0.08  | 0.0245 | 0.1132 | -0.24 | 0.0071 | 0.0646 | -0.52 | 0.0935 | 0.2454 | -0.30 | 0.0501 | 0.0569 | -0.23 | 0.0293 | 0.1464 | -0.24 |
| 3262 Probable 28S rRNA (cytosine(4447)-C(5))-methyltransferase                | P46087     | 0.4108              | 0.5356              | -3.31               | 0.5752              | 0.7499              | -1.75               | 0.5661              | 0.6788              | -1.19      | 0.5388 | 0.6420 | 0.89  | 0.2938 | 0.4340 | -1.88 | 0.9510 | 1.0358 | 0.09  | 0.0225 | 0.1362 | 0.43  | 0.8200 | 1.2642 | -0.03 | 0.2100 | 0.2786 | 0.09  |
| 3263 Probable 28S rRNA (cytosine-C(5))-methyltransferase                      | Q96P11     | 0.2052              | 0.3776              | -0.07               | 0.3972              | 0.7412              | -0.04               | 0.0516              | 0.1276              | -0.15      | 0.0884 | 0.1771 | -0.11 | 0.0286 | 0.1227 | -0.21 | 0.2260 | 0.4090 | -0.14 | 0.3736 | 0.4962 | -2.55 | 0.8708 | 1.0266 | -0.33 | 0.0651 | 0.1392 | 0.06  |
| 3264 Probable 2-oxoglutarate dehydrogenase E1 component DHKTD1 mitochondrial  | Q96H77     | 0.0644              | 0.1681              | 0.14                | 0.2472              | 0.6607              | 0.19                | 0.0178              | 0.0636              | 0.19       | 0.0043 | 0.0266 | 0.24  | 0.1714 | 0.2779 | -0.01 | 0.0045 | 0.0592 | 0.35  | 0.3736 | 0.6316 | -2.55 | 0.8708 | 1.2678 | -0.33 | 0.0651 | 0.2125 | 0.06  |
| 3265 Probable aminopeptidase NPEPL1                                           | Q8NDH3     | 0.3414              | 0.5494              | -0.06               | 0.0610              | 0.5939              | 0.24                | 0.0038              | 0.0321              | 0.19       | 0.5339 | 0.7412 | 0.02  | 0.0280 | 0.1214 | 0.10  | 0.0430 | 0.1367 | -0.16 | 0.3736 | 0.5675 | -2.55 | 0.8708 | 1.1554 | -0.33 | 0.0651 | 0.1745 | 0.06  |
| 3266 Probable ATP-dependent RNA helicase DDX17                                | Q9Y281     | 0.6526              | 0.7135              | -0.01               | 0.3614              | 0.7099              | 0.14                | 0.0097              | 0.0458              | 0.18       | 0.0037 | 0.0246 | 0.15  | 0.0234 | 0.1108 | -0.11 | 0.0110 | 0.0719 | 0.12  | 0.0112 | 0.1032 | 0.44  | 0.0310 | 0.1595 | 0.19  | 0.2005 | 0.1229 | 0.28  |
| 3267 Probable ATP-dependent RNA helicase DDX20                                | Q9U1H6     | 0.1461              | 0.2939              | 0.11                | 0.1474              | 0.6565              | 0.20                | 0.0381              | 0.1030              | 0.20       | 0.0428 | 0.1030 | 0.19  | 0.2030 | 0.4040 | 0.09  | 0.1031 | 0.2382 | 0.13  | 0.0716 | 0.2238 | 0.17  | 0.9193 | 0.9409 | 0.01  | 0.0527 | 0.2022 | 0.22  |
| 3268 Probable ATP-dependent RNA helicase DDX4                                 | Q9N0P0     | 0.0431              | 0.1319              | -0.10               | 0.0950              | 0.6309              | -0.21               | 0.0565              | 0.1360              | 0.08       | 0.0956 | 0.1876 | -0.05 | 0.0361 | 0.1381 | -0.06 | 0.1856 | 0.3573 | -0.06 | 0.0032 | 0.0621 | 0.41  | 0.0156 | 0.1055 | 0.19  | 0.0018 | 0.0491 | 0.49  |
| 3269 Probable ATP-dependent RNA helicase DDX46                                | Q7L014     | 0.1386              | 0.2832              | 0.07                | 0.3100              | 0.6796              | 0.16                | 0.0602              | 0.1419              | 0.12       | 0.1451 | 0.2581 | 0.07  | 0.0742 | 0.2090 | -0.10 | 0.1600 | 0.3207 | 0.07  | 0.0018 | 0.0527 | -1.04 | 0.0005 | 0.0240 | -1.16 | 0.0013 | 0.0455 | -0.59 |
| 3270 Probable ATP-dependent RNA helicase DDX5                                 | P17844     | 0.0217              | 0.0875              | 0.16                | 0.3652              | 0.7136              | 0.14                | 0.0079              | 0.0418              | 0.28       | 0.0084 | 0.0371 | 0.21  | 0.1259 | 0.2931 | -0.08 | 0.1699 | 0.3855 | 0.24  | 0.0325 | 0.1511 | 0.36  | 0.6546 | 1.0945 | -0.04 | 0.2690 | 0.3408 | -0.09 |
| 3271 Probable ATP-dependent RNA helicase DDX53                                | Q86TM3     | 0.4108              | 0.5355              | -3.31               | 0.5752              | 0.7499              | -1.75               | 0.5661              | 0.6786              | -1.19      | 0.5388 | 0.6419 | 0.89  | 0.2938 | 0.4338 | -1.88 | 0.9510 | 1.0356 | 0.09  | 0.8393 | 0.8647 | -0.02 | 0.0975 | 0.3120 | 0.22  | 0.3254 | 0.7817 | -0.02 |
| 3272 Probable ATP-dependent RNA helicase DDX6                                 | P26196     | 0.0482              | 0.1412              | 0.15                | 0.2270              | 0.6598              | 0.24                | 0.0207              | 0.0694              | 0.23       | 0.0112 | 0.0426 | 0.24  | 0.1980 | 0.3978 | -0.07 | 0.0352 | 0.1209 | 0.16  | 0.2325 | 0.4602 | -0.10 | 0.4193 | 0.8116 | -0.05 | 0.3764 | 0.1539 | -0.24 |
| 3273 Probable bifunctional dTTP/UTP pyrophosphatase/methyltransferase protein | Q95671     | 0.0562              | 0.1552              | 0.20                | 0.1437              | 0.6541              | 0.23                | 0.0046              | 0.0335              | 0.19       | 0.0045 | 0.0273 | 0.41  | 0.0075 | 0.0629 | 0.12  | 0.0137 | 0.0780 | 0.05  | 0.0671 | 0.2035 | 0.44  | 0.0096 | 0.0810 | 0.89  | 0.2001 | 0.2686 | 0.25  |
| 3274 Probable C-mannosyltransferase DPY19L4                                   | Q7Z388     | 0.                  |                     |                     |                     |                     |                     |                     |                     |            |        |        |       |        |        |       |        |        |       |        |        |       |        |        |       |        |        |       |

Supplementary Table S2. Overview on all relatively quantified 5180 proteins statistical analysis

| Protein name                                                    | UniProt    | MCF-7               |                     |                     |                     | MDA-MB-231          |                     |                     |                     |            |        |        |       |        |        |       |        |        |       |        |        |       |        |        |       |        |        |       |
|-----------------------------------------------------------------|------------|---------------------|---------------------|---------------------|---------------------|---------------------|---------------------|---------------------|---------------------|------------|--------|--------|-------|--------|--------|-------|--------|--------|-------|--------|--------|-------|--------|--------|-------|--------|--------|-------|
|                                                                 |            | Dai SC20 vs control | Gen SC20 vs control | SSE SC20 vs control | Dai IC20 vs control | Gen IC20 vs control | SSE IC20 vs control | Dai IC20 vs control | Gen IC20 vs control |            |        |        |       |        |        |       |        |        |       |        |        |       |        |        |       |        |        |       |
| p value                                                         | BH q value | log2FC              | p value             | BH q value          | log2FC              | p value             | BH q value          | log2FC              | p value             | BH q value | log2FC |        |       |        |        |       |        |        |       |        |        |       |        |        |       |        |        |       |
| 3312 Programmed cell death protein 4                            | Q53EL6     | 0.5641              | 0.6322              | -0.05               | 0.0136              | 0.4431              | -0.52               | 0.0769              | 0.1675              | -0.25      | 0.0328 | 0.0856 | -0.32 | 0.0412 | 0.1498 | -0.34 | 0.0694 | 0.9082 | -0.04 | 0.6314 | 0.6770 | -0.10 | 0.0065 | 0.0654 | 0.18  | 0.0056 | 0.0716 | -0.29 |
| 3313 Programmed cell death protein 5                            | I14737     | 0.1770              | 0.3392              | -0.10               | 0.1320              | 0.6475              | -0.17               | 0.5267              | 0.7477              | 0.04       | 0.1118 | 0.2116 | -0.13 | 0.0410 | 0.1496 | -0.21 | 0.1694 | 0.3343 | -0.10 | 0.8313 | 0.8325 | 0.03  | 0.9332 | 0.9514 | 0.01  | 0.4776 | 0.5461 | -0.06 |
| 3314 Programmed cell death protein 6                            | O75340     | 0.0610              | 0.1633              | 0.13                | 0.5841              | 0.6913              | 0.07                | 0.6668              | 0.7179              | -0.02      | 0.6228 | 0.6692 | -0.02 | 0.1336 | 0.3027 | -0.09 | 0.4640 | 0.6867 | 0.04  | 0.0041 | 0.0690 | -0.46 | 0.0033 | 0.0476 | -0.33 | 0.0004 | 0.0276 | -0.68 |
| 3315 Prohibitin                                                 | P35232     | 0.0308              | 0.1083              | 0.18                | 0.2760              | 0.6650              | 0.21                | 0.0117              | 0.7506              | 0.24       | 0.0072 | 0.0344 | 0.27  | 0.6626 | 0.7279 | -0.02 | 0.0031 | 0.0972 | 0.23  | 0.0791 | 0.2233 | 0.33  | 0.6200 | 1.0551 | 0.04  | 0.0792 | 0.1300 | -0.13 |
| 3316 Prohibitin-2                                               | Q96K23     | 0.0314              | 0.1097              | 0.17                | 0.4410              | 0.7770              | 0.14                | 0.0209              | 0.6609              | 0.27       | 0.0275 | 0.0754 | 0.19  | 0.0985 | 0.2506 | -0.11 | 0.0139 | 0.0886 | 0.24  | 0.0349 | 0.1546 | 0.39  | 0.2332 | 0.5483 | 0.16  | 0.8497 | 0.8787 | 0.02  |
| 3317 Prolactin regulatory element-binding protein               | Q9HCU5     | 0.2255              | 0.4043              | 0.32                | 0.0398              | 0.5633              | 0.73                | 0.0286              | 0.0858              | 0.82       | 0.1484 | 0.2629 | 0.41  | 0.0215 | 0.1057 | 0.93  | 0.3588 | 0.5649 | 0.22  | 0.3736 | 0.4734 | -2.55 | 0.8708 | 0.9844 | -0.33 | 0.0651 | 0.1292 | -0.06 |
| 3318 Proliferating cell nuclear antigen                         | P12004     | 0.0055              | 0.0448              | 0.29                | 0.1795              | 0.6642              | 0.29                | 0.0384              | 0.1035              | 0.24       | 0.0031 | 0.0227 | 0.31  | 0.0883 | 0.2328 | -0.10 | 0.0469 | 0.1439 | 0.15  | 0.1165 | 0.2839 | 0.30  | 0.2069 | 0.5079 | -0.15 | 0.0810 | 0.1321 | -0.24 |
| 3319 Proliferation-associated protein 2G4                       | Q9UCQ8     | 0.0387              | 0.1236              | 0.17                | 0.2541              | 0.6631              | 0.25                | 0.0034              | 0.0309              | 0.38       | 0.0048 | 0.0281 | 0.33  | 0.6323 | 0.7024 | 0.02  | 0.0224 | 0.0958 | 0.26  | 0.0423 | 0.1676 | 0.51  | 0.2414 | 0.5595 | 0.15  | 0.2087 | 0.2776 | 0.13  |
| 3320 Proline-rich protein 18                                    | Q8N4B5     | 0.2253              | 0.4041              | -0.05               | 0.1307              | 0.6454              | -0.38               | 0.0132              | 0.0538              | -0.36      | 0.0086 | 0.0375 | -0.52 | 0.0002 | 0.0136 | -0.78 | 0.0276 | 0.1067 | -0.83 | 0.3736 | 0.5833 | -2.55 | 0.8708 | 1.1833 | -0.33 | 0.0651 | 0.1832 | -0.06 |
| 3321 Proline-serine-threonine phosphatase-interacting protein 1 | O43586     | 0.7458              | 0.7931              | 0.02                | 0.5317              | 0.8503              | 0.08                | 0.6223              | 0.6762              | 0.03       | 0.2298 | 0.3729 | 0.10  | 0.5129 | 0.6019 | -0.05 | 0.1842 | 0.3551 | 0.11  | 0.3736 | 0.5058 | -2.55 | 0.8708 | 1.0442 | -0.33 | 0.0651 | 0.1436 | -0.06 |
| 3322 Proline-serine-threonine phosphatase-interacting protein 2 | Q9H939     | 0.4108              | 0.5339              | -3.31               | 0.5752              | 0.7475              | -1.75               | 0.5661              | 0.6768              | -1.19      | 0.5388 | 0.6401 | 0.89  | 0.2938 | 0.4324 | -1.88 | 0.9510 | 1.0330 | 0.09  | 0.0088 | 0.0932 | -0.95 | 0.0021 | 0.0380 | -0.73 | 0.6449 | 0.7014 | -0.20 |
| 3323 Prolyl 3-hydroxylase 1                                     | Q32P28     | 0.4108              | 0.5337              | -3.31               | 0.5752              | 0.7473              | -1.75               | 0.5661              | 0.6766              | -1.19      | 0.5388 | 0.6400 | 0.89  | 0.2938 | 0.4322 | -1.88 | 0.9510 | 1.0327 | 0.09  | 0.1815 | 0.3823 | 0.15  | 0.3945 | 0.7782 | -0.03 | 0.3551 | 0.4268 | -0.08 |
| 3324 Prolyl 3-hydroxylase 2                                     | Q8IVL5     | 0.0205              | 0.0846              | 0.80                | 0.0603              | 0.5938              | -0.81               | 0.0051              | 0.0350              | 1.43       | 0.0017 | 0.0183 | 1.57  | 0.0020 | 0.0355 | 1.16  | 0.0321 | 0.1157 | 2.38  | 0.0885 | 0.2395 | 1.12  | 0.1170 | 0.3522 | -0.87 | 0.1945 | 0.2625 | 1.27  |
| 3325 Prolyl 3-hydroxylase OGFOD1                                | Q8N543     | 0.4108              | 0.5336              | -3.31               | 0.5752              | 0.7471              | -1.75               | 0.5661              | 0.6764              | -1.19      | 0.5388 | 0.6398 | 0.89  | 0.2938 | 0.4321 | -1.88 | 0.9510 | 1.0325 | 0.09  | 0.5347 | 0.5867 | 0.05  | 0.7867 | 1.2304 | -0.02 | 0.6020 | 0.6628 | 0.03  |
| 3326 Prolyl 4-hydroxylase subunit alpha-1                       | P13674     | 0.2517              | 0.4384              | -0.08               | 0.1010              | 0.6326              | 0.33                | 0.3379              | 0.5304              | 0.07       | 0.6983 | 0.7376 | -0.03 | 0.0693 | 0.2003 | -0.18 | 0.5909 | 0.8277 | -0.03 | 0.1314 | 0.5718 | 0.11  | 0.9034 | 0.9278 | 0.01  | 0.0162 | 0.1090 | -0.28 |
| 3327 Prolyl 4-hydroxylase subunit alpha-2                       | I15460     | 0.4108              | 0.5335              | -3.31               | 0.5752              | 0.7469              | -1.75               | 0.5661              | 0.6763              | -1.19      | 0.5388 | 0.6397 | 0.89  | 0.2938 | 0.4320 | -1.88 | 0.9510 | 1.0323 | 0.09  | 0.3685 | 0.6501 | -0.13 | 0.1973 | 0.4930 | 0.21  | 0.0458 | 0.1871 | 0.42  |
| 3328 Prolyl endopeptidase                                       | P48147     | 0.3058              | 0.5067              | 0.08                | 0.2340              | 0.6609              | 0.13                | 0.0030              | 0.0299              | 0.25       | 0.0093 | 0.0388 | 0.18  | 0.2436 | 0.4577 | 0.05  | 0.0196 | 0.0902 | 0.26  | 0.0704 | 0.2095 | 0.23  | 0.0549 | 0.2241 | -0.26 | 0.6501 | 0.7061 | -0.15 |
| 3329 Prolyl endopeptidase FAP                                   | U12884     | 0.0321              | 0.1114              | 0.45                | 0.1981              | 0.6681              | 0.53                | 0.0021              | 0.0258              | 0.27       | 0.0043 | 0.0268 | 0.55  | 0.0335 | 0.1339 | -0.20 | 0.7700 | 0.3353 | 0.27  | 0.1584 | 0.3506 | -3.54 | 0.4404 | 0.8421 | -1.35 | 0.9327 | 0.9460 | 0.12  |
| 3330 Pro-opiomelanocortin                                       | P01189     | 0.1992              | 0.3696              | -0.27               | 0.3592              | 0.7086              | -0.37               | 0.4898              | 0.7384              | 0.10       | 0.2098 | 0.3454 | 0.26  | 0.9898 | 0.9931 | 0.00  | 0.5603 | 0.7956 | -0.10 | 0.3736 | 0.4560 | -2.55 | 0.8708 | 0.9820 | -0.33 | 0.0651 | 0.1219 | -0.06 |
| 3331 Proprotein convertase subtilisin/kexin type 4              | Q6UW60     | 0.1649              | 0.3221              | -0.17               | 0.8656              | 0.9029              | 0.02                | 0.0396              | 0.1058              | -0.20      | 0.1663 | 0.2865 | 0.17  | 0.9057 | 0.9288 | 0.01  | 0.2305 | 0.4137 | -0.15 | 0.9176 | 0.9329 | -0.01 | 0.8744 | 0.9050 | 0.01  | 0.3331 | 0.1554 | 0.20  |
| 3332 Proserpine homeobox protein 1                              | Q92786     | 0.7316              | 0.7815              | 0.01                | 0.2313              | 0.6627              | 0.22                | 0.0002              | 0.0093              | 0.27       | 0.0054 | 0.0550 | 0.12  | 0.0070 | 0.0649 | -0.18 | 0.0407 | 0.1657 | -0.34 | 0.1906 | 0.4830 | -0.10 | 0.0026 | 0.0543 | -0.28 |        |        |       |
| 3333 Prostaglandin E synthase 2                                 | Q9H727     | 0.7523              | 0.7982              | -0.01               | 0.1284              | 0.6426              | -0.09               | 0.0260              | 0.0805              | -0.24      | 0.0170 | 0.0545 | -0.18 | 0.0102 | 0.0723 | -0.20 | 0.2274 | 0.4104 | -0.11 | 0.3736 | 0.4957 | -2.55 | 0.8708 | 1.0256 | -0.33 | 0.0651 | 0.1389 | -0.06 |
| 3334 Prostaglandin H synthase 3                                 | Q15185     | 0.0052              | 0.0439              | 0.20                | 0.8399              | 0.8850              | -0.01               | 0.0066              | 0.0392              | 0.23       | 0.4148 | 0.6070 | 0.03  | 0.0344 | 0.1353 | -0.11 | 0.2556 | 0.4458 | 0.09  | 0.6640 | 0.7082 | 0.04  | 0.0104 | 0.0837 | -0.26 | 0.0304 | 0.1479 | -0.19 |
| 3335 Prostaglandin F2 receptor negative regulator               | Q9P2B2     | 0.5305              | 0.6016              | 0.04                | 0.3011              | 0.6743              | 0.17                | 0.5280              | 0.7489              | 0.05       | 0.1535 | 0.2699 | 0.11  | 0.6664 | 0.7310 | -0.03 | 0.1731 | 0.3403 | 0.10  | 0.3736 | 0.5090 | -2.55 | 0.8708 | 1.0500 | -0.33 | 0.0651 | 0.1450 | -0.06 |
| 3336 Prostaglandin reductase 1                                  | Q14914     | 0.0623              | 0.1655              | 0.09                | 0.2546              | 0.6627              | 0.18                | 0.0106              | 0.0479              | 0.27       | 0.0001 | 0.0077 | 0.42  | 0.0025 | 0.0392 | 0.37  | 0.0290 | 0.1092 | 0.31  | 0.0618 | 0.1960 | 0.52  | 0.0935 | 0.3042 | 0.24  | 0.0245 | 0.1329 | 0.31  |
| 3337 Prostate and testis expressed protein 2                    | Q6UY27     | 0.5928              | 0.6592              | 0.08                | 0.2895              | 0.6686              | 0.14                | 0.3273              | 0.5161              | 0.27       | 0.2016 | 0.3343 | 0.18  | 0.5778 | 0.6565 | -0.02 | 0.1446 | 0.2997 | -0.42 | 0.0435 | 0.1683 | 0.37  | 0.3481 | 0.7105 | 0.12  | 0.0955 | 0.1208 | 0.64  |
| 3338 Prostate tumor-overexpressed gene 1 protein                | Q86YD1     | 0.2737              | 0.4668              | -0.43               | 0.3437              | 0.7009              | -0.66               | 0.3773              | 0.7953              | 0.08       | 0.3288 | 0.5006 | 0.24  | 0.5052 | 0.5942 | -0.16 | 0.5727 | 0.8079 | -0.24 | 0.3736 | 0.4545 | -2.55 | 0.8708 | 0.9492 | -0.33 | 0.0651 | 0.1213 | -0.06 |
| 3339 Proteasomal ubiquitin receptor ADRM1                       | U16186     | 0.0071              | 0.0496              | 0.23                | 0.0171              | 0.4613              | 0.31                | 0.0006              | 0.0210              | 0.41       | 0.0002 | 0.0116 | 0.55  | 0.0180 | 0.0959 | -0.17 | 0.0021 | 0.0539 | 0.39  | 0.0965 | 0.2496 | 0.43  | 0.1444 | 0.4061 | -0.19 | 0.2154 | 0.2841 | -0.19 |
| 3340 Proteasome activator complex subunit 1                     | Q06323     | 0.4014              | 0.6212              | -0.06               | 0.5909              | 0.6968              | 0.10                | 0.9533              | 0.9633              | 0.00       | 0.3154 | 0.4852 | 0.08  | 0.1015 | 0.2555 | -0.14 | 0.1222 | 0.3934 | 0.09  | 0.1070 | 0.2670 | 0.17  | 0.8147 | 1.2594 | 0.02  | 0.0799 | 0.1309 | -0.14 |
| 3341 Proteasome activator complex subunit 2                     | Q9UL46     | 0.0713              | 0.1792              | 0.10                | 0.2324              | 0.6622              | 0.27                | 0.0040              | 0.0321              | 0.25       | 0.0022 | 0.0203 | 0.29  | 0.3654 | 0.4622 | 0.04  | 0.0105 | 0.0704 | 0.29  | 0.0845 | 0.2322 | 0.21  | 0.4587 | 0.8637 | 0.02  | 0.1014 | 0.1572 | -0.03 |
| 3342 Proteasome activator complex subunit 3                     | P61289     | 0.1685              | 0.3268              | -0.09               | 0.2820              | 0.8938              | 0.01                | 0.0821              | 0.1761              | 0.13       | 0.0663 | 0.7087 | -0.02 | 0.0917 | 0.2389 | 0.12  | 0.0428 | 0.1365 | -0.19 | 0.0016 | 0.0528 | 0.18  | 0.0743 | 0.2643 | 0.06  | 0.0100 | 0.0384 | -0.26 |
| 3343 Proteasome activator complex subunit 4                     | I14997     | 0.0947              | 0.2167              | 0.07                | 0.4912              | 0.8145              | 0.04                | 0.0023              | 0.0264              | 0.11       | 0.0020 | 0.0198 | 0.11  | 0.5252 | 0.6120 | 0.02  | 0.0092 | 0.0688 | 0.15  | 0.3736 | 0.6157 | -2.55 | 0.8708 | 1.2402 | -0.33 | 0.0651 | 0.2024 | -0.06 |
| 3344 Proteasome adapter and scaffold protein ECM29              | Q5VYK3     | 0.0141              | 0.0693              | 0.18                | 0.2192              | 0.6601              | 0.20                | 0.0037              | 0.0317              | 0.23       | 0.0042 | 0.0265 | 0.23  | 0.4604 | 0.5524 | 0.03  | 0.0171 | 0.0851 | 0.16  | 0.0505 | 0.1789 | 0.27  | 0.9731 | 0.9807 | 0.00  | 0.1913 | 0.2590 | 0.05  |
| 3345 Proteasome assembly chaperone 1                            | Q95456     | 0.0022              | 0.0318              | 0.24                | 0.4131              | 0.7524              | 0.12                | 0.0029              | 0.0293              | 0.31       | 0.0083 | 0.0370 | 0.15  | 0.1764 | 0.3670 | 0.05  | 0.0016 | 0.0508 | 0.27  | 0.0212 | 0.1344 | -0.26 | 0.2940 | 0.6533 | -0.15 | 0.0952 | 0.1498 | 0.39  |
| 3346 Proteasome assembly chaperone 2                            | Q969U7     | 0.2065              | 0.3789              | -0.28               | 0.5988              | 0.7098              | -0.41               | 0.8335              | 0.9497              | 0.04       | 0.2540 | 0.7878 | 0.07  | 0.2210 | 0.4967 | 0.24  | 0.2545 | 0.8004 | -0.12 | 0.0269 | 0.1420 | -0.68 | 0.0332 | 0.9951 | 1.28  | 0.4783 | 0.5467 | -0.13 |
| 3347 Proteasome assembly chaperone 3                            | Q9T173     | 0.0071              | 0.0496              | -0.19               | 0.0671              | 0.5901              | -0.18               | 0.0218              | 0.0718              | -0.50      | 0.0003 | 0.0106 | -0.78 | 0.0056 | 0.0560 | -0.60 | 0.5212 | 0.7493 | -0.16 | 0.3736 | 0.4587 | -2.55 | 0.8708 | 0.9571 | -0.33 | 0.0651 | 0.1230 | -0.06 |
| 3348 Proteasome assembly chaperone 4                            | Q3J554     | 0.0400              | 0.1260              | 0.21                | 0.8971              | 0.9272              | 0.02                | 0.0032              | 0.0301              | -0.18      | 0.0840 | 0.1702 | 0.20  | 0.8079 | 0.8506 | 0.02  | 0.0119 | 0.0739 | 0.18  | 0.6133 | 0.6608 | -0.98 | 0.8396 | 1.2833 | 0.36  | 0.7216 | 0.7702 | 0.63  |
| 3349 Proteasome inhibitor P131 subunit                          | Q92530     | 0.0596              | 0.1615              | -0.35               | 0.0283              | 0.5072              | -0.47               | 0.1989              | 0.3496              | -0.68      | 0.0091 | 0.0382 | -0.65 | 0.0296 | 0.1256 | -0.47 | 0.0614 | 0.1723 | -0.36 | 0.1947 | 0.4031 | 0.22  | 0.1623 | 0.4381 | 0.14  | 0.0567 | 0.2118 | 0.19  |
| 3350 Proteasome subunit alpha type-1                            | P25786     | 0.7794              | 0.8206              | 0.02                | 0                   |                     |                     |                     |                     |            |        |        |       |        |        |       |        |        |       |        |        |       |        |        |       |        |        |       |

Supplementary Table S2. Overview on all relatively quantified 5180 proteins statistical analysis

| Protein name                        | UniProt    | MCF-7               |                     |                     |                     | MDA-MB-231          |                     |                     |                     |            |        |        |        |        |        |        |        |        |        |        |        |        |        |        |        |        |        |       |
|-------------------------------------|------------|---------------------|---------------------|---------------------|---------------------|---------------------|---------------------|---------------------|---------------------|------------|--------|--------|--------|--------|--------|--------|--------|--------|--------|--------|--------|--------|--------|--------|--------|--------|--------|-------|
|                                     |            | Dai SC20 vs control | Gen SC20 vs control | SSE SC20 vs control | Dai IC20 vs control | Gen IC20 vs control | SSE IC20 vs control | Dai IC20 vs control | SSE IC20 vs control |            |        |        |        |        |        |        |        |        |        |        |        |        |        |        |        |        |        |       |
| p value                             | BH q value | log2FC              | p value             | BH q value          | log2FC              | p value             | BH q value          | log2FC              | p value             | BH q value | log2FC |        |        |        |        |        |        |        |        |        |        |        |        |        |        |        |        |       |
| 3394 Protein CYR61                  | O00622     | 0.0335              | 0.1144              | -0.84               | 0.1747              | 0.6610              | -2.85               | 0.7556              | 0.7970              | -0.11      | 0.5589 | 0.6096 | -0.14  | 0.2289 | 0.4387 | -0.38  | 0.2501 | 0.4395 | -0.44  | 0.0114 | 0.1036 | 0.45   | 0.0910 | 0.3002 | 0.18   | 0.0352 | 0.1609 | 0.42  |
| 3395 Q9P219                         | 0.4108     | 0.5320              | -3.81               | 0.5752              | 0.7449              | -1.75               | 0.5661              | 0.6746              | -0.19               | 0.5388     | 0.6381 | 0.89   | 0.2938 | 0.4306 | -1.88  | 0.9510 | 1.0299 | 0.09   | 0.4850 | 0.5397 | 0.09   | 0.0189 | 0.4741 | -0.13  | 0.0101 | 0.1982 | -0.23  |       |
| 3396 Protein DDH1 homolog 2         | Q5TDH0     | 0.0094              | 0.2159              | -0.08               | 0.1529              | 0.6589              | -0.15               | 0.0177              | 0.0635              | -0.21      | 0.0218 | 0.0642 | -0.31  | 0.0011 | 0.0260 | -0.33  | 0.1295 | 0.2803 | -0.23  | 0.3736 | 0.5247 | -2.55  | 0.8708 | 1.0786 | -0.33  | 0.0651 | 0.1525 | 2.06  |
| 3397 P35659                         | 0.0940     | 0.0573              | 0.26                | 0.7650              | 0.8301              | -0.02               | 0.9538              | 0.9635              | 0.00                | 0.4999     | 0.7033 | -0.02  | 0.0763 | 0.3125 | -0.09  | 0.3414 | 0.5457 | -0.03  | 0.6286 | 0.6746 | 0.11   | 0.1476 | 0.4126 | -0.18  | 0.9964 | 0.9974 | 0.00   |       |
| 3398 Protein diaphanous homolog 1   | Q60610     | 0.0524              | 0.1482              | 0.12                | 0.2671              | 0.6630              | 0.18                | 0.0106              | 0.0483              | 0.20       | 0.0345 | 0.0886 | 0.14   | 0.1248 | 0.2917 | -0.09  | 0.1303 | 0.2649 | 0.09   | 0.0147 | 0.1120 | 0.34   | 0.2084 | 0.5099 | 0.07   | 0.1401 | 0.2014 | 0.08  |
| 3399 Protein disulfide-isomerase    | P07373     | 0.0024              | 0.0332              | 0.37                | 0.2144              | 0.6615              | 0.27                | 0.0005              | 0.0192              | 0.53       | 0.0002 | 0.0118 | 0.66   | 0.0038 | 0.0461 | 0.38   | 0.0017 | 0.0521 | 0.68   | 0.0278 | 0.1446 | 0.48   | 0.3737 | 0.7468 | 0.09   | 0.5286 | 0.5950 | 0.05  |
| 3400 Protein disulfide-isomerase A3 | P10101     | 0.0017              | 0.0282              | 0.24                | 0.2552              | 0.6612              | 0.27                | 0.0022              | 0.0264              | 0.38       | 0.0005 | 0.0126 | 0.41   | 0.0171 | 0.0939 | 0.17   | 0.0015 | 0.0511 | 0.46   | 0.0817 | 0.2281 | 0.31   | 0.9446 | 0.9602 | 0.01   | 0.6846 | 0.7377 | -0.02 |
| 3401 Protein disulfide-isomerase A4 | P13667     | 0.0054              | 0.0444              | 0.32                | 0.1474              | 0.6571              | 0.31                | 0.0009              | 0.0212              | 0.54       | 0.0007 | 0.0140 | 0.55   | 0.0152 | 0.0880 | 0.30   | 0.0058 | 0.0621 | 0.56   | 0.0587 | 0.1923 | 0.39   | 0.8816 | 0.9108 | -0.02  | 0.6931 | 0.7452 | -0.04 |
| 3402 Protein disulfide-isomerase A5 | I14554     | 0.0057              | 0.0454              | -1.82               | 0.2838              | 0.6643              | -1.74               | 0.2004              | 0.3520              | -0.71      | 0.0023 | 0.0203 | -1.52  | 0.4565 | 0.5490 | -0.19  | 0.0325 | 0.1161 | -0.84  | 0.3736 | 0.5785 | -2.55  | 0.8708 | 1.1750 | -0.33  | 0.0651 | 0.1805 | 2.06  |
| 3403 Protein disulfide-isomerase A6 | I15084     | 0.0157              | 0.0727              | 0.20                | 0.1573              | 0.6619              | 0.17                | 0.0033              | 0.0309              | 0.27       | 0.0060 | 0.0312 | 0.22   | 0.0252 | 0.1141 | 0.16   | 0.0103 | 0.0700 | 0.28   | 0.0704 | 0.2096 | 0.26   | 0.3029 | 0.6478 | -0.09  | 0.2873 | 0.3592 | 0.07  |
| 3404 Protein doxey-1                | Q5JWR5     | 0.8135              | 0.8499              | 0.04                | 0.5102              | 0.8319              | -0.09               | 0.0546              | 0.1329              | -0.38      | 0.2122 | 0.3487 | 0.22   | 0.3752 | 0.4724 | -0.12  | 0.9476 | 1.1839 | 0.01   | 0.5070 | 0.1790 | -0.74  | 0.0352 | 0.1704 | -0.27  | 0.0064 | 0.0748 | -0.26 |
| 3405 Protein Dr1                    | Q01658     | 0.4108              | 0.5319              | -3.31               | 0.5752              | 0.7447              | -1.75               | 0.5661              | 0.6744              | -1.19      | 0.5388 | 0.6379 | 0.89   | 0.2938 | 0.4305 | -1.88  | 0.9510 | 1.0297 | 0.09   | 0.4705 | 0.5253 | 0.05   | 0.0173 | 0.1110 | -0.26  | 0.0255 | 0.1359 | -0.28 |
| 3406 Protein ECT2                   | Q9H8V3     | 0.9206              | 0.9395              | 0.01                | 0.4189              | 0.7574              | 0.08                | 0.0772              | 0.1679              | 0.12       | 0.4205 | 0.6122 | -0.04  | 0.9281 | 0.9462 | -0.01  | 0.0590 | 0.1676 | 0.15   | 0.3294 | 0.5974 | -0.26  | 0.6040 | 1.0374 | -0.09  | 0.9147 | 0.9311 | -0.02 |
| 3407 Protein EFR3 homolog B         | Q9Y2G0     | 0.0440              | 0.1332              | -0.24               | 0.0944              | 0.6301              | 0.17                | 0.4482              | 0.6616              | 0.05       | 0.1177 | 0.2195 | -0.15  | 0.5005 | 0.5900 | 0.06   | 0.2278 | 0.4106 | 0.17   | 0.3736 | 0.4956 | -2.55  | 0.8708 | 1.0254 | -0.33  | 0.0651 | 0.1389 | 2.06  |
| 3408 Protein enabled homolog        | Q8N8S7     | 0.0592              | 0.1609              | -0.17               | 0.6167              | 0.7164              | 0.07                | 0.0448              | 0.1159              | 0.18       | 0.4257 | 0.6177 | -0.05  | 0.0381 | 0.1422 | -0.23  | 0.3177 | 0.5200 | -0.06  | 0.0483 | 0.1758 | 0.38   | 0.0018 | 0.0348 | 0.08   | 0.0233 | 0.1299 | 0.65  |
| 3409 Protein ERGIC-53               | P49257     | 0.0193              | 0.0815              | 0.18                | 0.1102              | 0.6336              | 0.21                | 0.0043              | 0.0327              | 0.28       | 0.0055 | 0.0298 | 0.30   | 0.0399 | 0.1467 | 0.15   | 0.0047 | 0.0601 | 0.32   | 0.0462 | 0.1725 | 0.39   | 0.0027 | 0.0432 | 0.31   | 0.0041 | 0.0628 | 0.31  |
| 3410 Protein eyes shut homolog      | Q5T1H1     | 0.7694              | 0.8127              | 0.01                | 0.3073              | 0.6774              | 0.14                | 0.5286              | 0.7496              | -0.02      | 0.0463 | 0.1092 | 0.14   | 0.1481 | 0.3241 | -0.06  | 0.2791 | 0.4753 | 0.04   | 0.3736 | 0.4858 | -2.55  | 0.8708 | 1.0073 | -0.33  | 0.0651 | 0.1345 | 2.06  |
| 3411 Protein FAM102B                | Q5TR83     | 0.4027              | 0.6227              | -0.12               | 0.7085              | 0.7859              | 0.07                | 0.0532              | 0.1307              | -0.28      | 0.0100 | 0.0401 | -0.50  | 0.0088 | 0.0671 | -0.57  | 0.0054 | 0.0622 | -0.72  | 0.3736 | 0.6285 | -2.55  | 0.8708 | 1.2625 | -0.33  | 0.0651 | 0.2105 | 2.06  |
| 3412 Protein FAM104B                | Q5XKR9     | 0.1017              | 0.2277              | 0.35                | 0.8872              | 0.9195              | -0.06               | 0.0910              | 0.1899              | 0.36       | 0.0314 | 0.0828 | 0.54   | 0.1372 | 0.3077 | 0.31   | 0.0559 | 0.1615 | 0.53   | 0.0226 | 0.1364 | 0.55   | 0.0103 | 0.0838 | 0.51   | 0.0090 | 0.0849 | 0.80  |
| 3413 Protein FAM114A2               | Q9NRY5     | 0.0084              | 0.0542              | 0.22                | 0.7139              | 0.7905              | -0.04               | 0.9136              | 0.9320              | 0.00       | 0.0409 | 0.1001 | 0.13   | 0.0818 | 0.2208 | 0.09   | 0.0284 | 0.1078 | 0.16   | 0.3736 | 0.5819 | -2.55  | 0.8708 | 1.1808 | -0.33  | 0.0651 | 0.1824 | 2.06  |
| 3414 Protein FAM112B                | Q7Z309     | 0.4630              | 0.5399              | 0.13                | 0.9101              | 0.9374              | -0.03               | 0.5848              | 0.6412              | 0.10       | 0.5098 | 0.7145 | 0.12   | 0.7885 | 0.8339 | 0.05   | 0.6788 | 0.9178 | 0.08   | 0.1276 | 0.1065 | 0.21   | 0.3565 | 0.7231 | -0.05  | 0.0084 | 0.0818 | 0.34  |
| 3415 Protein FAM124B                | Q9H5Z6     | 0.0737              | 0.1940              | 0.06                | 0.0125              | 0.4405              | 0.14                | 0.0001              | 0.0273              | 0.40       | 0.0004 | 0.0134 | 0.29   | 0.0001 | 0.0120 | 0.46   | 0.0007 | 0.0453 | 0.34   | 0.3736 | 0.6512 | -2.55  | 0.8708 | 1.3014 | -0.33  | 0.0651 | 0.2256 | 2.06  |
| 3416 Protein FAM135B                | Q9A4J0     | 0.7724              | 0.8132              | -0.05               | 0.0666              | 0.5938              | -0.25               | 0.0470              | 0.1203              | 0.23       | 0.0281 | 0.0766 | -0.27  | 0.9713 | 0.9775 | 0.00   | 0.0188 | 0.0882 | 0.36   | 0.3736 | 0.5951 | -2.55  | 0.8708 | 1.2041 | -0.33  | 0.0651 | 0.1900 | 2.06  |
| 3417 Protein FAM136A                | Q96C01     | 0.4691              | 0.5450              | 0.04                | 0.3517              | 0.6811              | 0.13                | 0.1783              | 0.3214              | 0.09       | 0.0194 | 0.0591 | 0.12   | 0.7940 | 0.8390 | 0.01   | 0.0538 | 0.1573 | 0.13   | 0.8791 | 0.8994 | -0.01  | 0.1064 | 0.3306 | -0.10  | 0.1613 | 0.1092 | -0.22 |
| 3418 Protein FAM160A1               | Q0SDH4     | 0.4108              | 0.5317              | -3.31               | 0.5752              | 0.7445              | -1.75               | 0.5661              | 0.6743              | -1.19      | 0.5388 | 0.6378 | 0.89   | 0.2938 | 0.4304 | -1.88  | 0.9510 | 1.0295 | 0.09   | 0.0316 | 0.1502 | -0.22  | 0.0230 | 0.1333 | 0.24   | 0.1392 | 0.2005 | 0.13  |
| 3419 Protein FAM162A                | Q96A26     | 0.0002              | 0.0133              | 0.72                | 0.6137              | 0.7149              | -0.15               | 0.0378              | 0.1023              | -0.17      | 0.0362 | 0.0914 | -0.35  | 0.0740 | 0.2086 | -0.37  | 0.2661 | 0.4589 | 0.06   | 0.3736 | 0.4875 | -2.55  | 0.8708 | 1.0105 | -0.33  | 0.0651 | 0.1353 | 2.06  |
| 3420 Protein FAM167B                | Q9BTA0     | 0.4108              | 0.5316              | -3.31               | 0.5752              | 0.7443              | -1.75               | 0.5661              | 0.6741              | -1.19      | 0.5388 | 0.6376 | 0.89   | 0.2938 | 0.4303 | -1.88  | 0.9510 | 1.0293 | 0.09   | 0.1059 | 0.2660 | -0.22  | 0.0084 | 0.0752 | -0.28  | 0.0212 | 0.1246 | -0.36 |
| 3421 Protein FAM170A                | AIAS19     | 0.2068              | 0.3793              | 0.68                | 0.7893              | 0.8484              | 0.12                | 0.7189              | 0.7639              | 0.16       | 0.7415 | 0.7772 | -0.14  | 0.5716 | 0.6517 | -0.25  | 0.3442 | 0.5483 | 0.46   | 0.0079 | 0.0909 | -1.42  | 0.0610 | 0.2363 | -6.69  | 0.0006 | 0.0293 | -4.30 |
| 3422 Protein FAM177A1               | Q8N128     | 0.0174              | 0.0772              | 0.22                | 0.5276              | 0.8461              | 0.09                | 0.0867              | 0.1837              | 0.12       | 0.1981 | 0.3294 | 0.08   | 0.2075 | 0.4101 | 0.07   | 0.1023 | 0.2371 | 0.12   | 0.3736 | 0.5331 | -2.55  | 0.8708 | 1.0938 | -0.33  | 0.0651 | 0.1566 | 2.06  |
| 3423 Protein FAM183BP               | Q6ZV57     | 0.4108              | 0.5315              | -3.31               | 0.5752              | 0.7441              | -1.75               | 0.5661              | 0.6740              | -1.19      | 0.5388 | 0.6375 | 0.89   | 0.2938 | 0.4302 | -1.88  | 0.9510 | 1.0291 | 0.09   | 0.0002 | 0.0296 | -1.08  | 0.0127 | 0.0940 | -1.63  | 0.0209 | 0.1239 | -2.23 |
| 3424 Protein FAM186A                | AGNE01     | 0.4108              | 0.5313              | -3.31               | 0.5752              | 0.7440              | -1.75               | 0.5661              | 0.6738              | -1.19      | 0.5388 | 0.6374 | 0.89   | 0.2938 | 0.4300 | -1.88  | 0.9510 | 1.0289 | 0.09   | 0.3070 | 0.5667 | 0.08   | 0.0271 | 0.1484 | 0.18   | 0.0251 | 0.1346 | 0.30  |
| 3425 Protein FAM193A                | P78312     | 0.4108              | 0.5312              | -3.31               | 0.5752              | 0.7438              | -1.75               | 0.5661              | 0.6736              | -1.19      | 0.5388 | 0.6372 | 0.89   | 0.2938 | 0.4299 | -1.88  | 0.9510 | 1.0286 | 0.09   | 0.0333 | 0.1521 | 0.06   | 0.0975 | 0.9546 | 0.00   | 0.8222 | 0.8566 | -0.02 |
| 3426 Protein FAM204A                | Q9HRW3     | 0.5223              | 0.5940              | -0.28               | 0.9708              | 0.9803              | -0.03               | 0.6557              | 0.7070              | 0.19       | 0.8046 | 0.8322 | 0.12   | 0.6447 | 0.7131 | 0.21   | 0.6566 | 0.8936 | -0.20  | 0.3736 | 0.4474 | -2.55  | 0.8708 | 0.9358 | -0.33  | 0.0651 | 0.1184 | 2.06  |
| 3427 Protein FAM217A                | Q8IXS0     | 0.0108              | 0.0598              | -0.24               | 0.0021              | 0.2266              | -0.30               | 0.0018              | 0.0245              | -0.40      | 0.0026 | 0.0217 | -0.31  | 0.0114 | 0.0766 | 0.18   | 0.2143 | 0.3959 | -0.06  | 0.3736 | 0.4998 | -2.55  | 0.8708 | 1.0332 | -0.33  | 0.0651 | 0.1408 | 2.06  |
| 3428 Protein FAM236D                | AOA1B0G7K5 | 0.1975              | 0.3667              | 2.63                | 0.0699              | 0.6015              | -8.94               | 0.1383              | 0.2624              | 0.72       | 0.0949 | 0.1863 | 0.69   | 0.0202 | 0.1020 | 1.12   | 0.0114 | 0.0734 | 1.62   | 0.3736 | 0.6101 | -2.55  | 0.8708 | 1.2304 | -0.33  | 0.0651 | 0.1989 | 2.06  |
| 3429 Protein FAM3C                  | Q92520     | 0.2013              | 0.3720              | 0.27                | 0.7080              | 0.8416              | -0.13               | 0.0766              | 0.1670              | 0.50       | 0.3164 | 0.4866 | 0.21   | 0.0803 | 0.2185 | 0.44   | 0.0886 | 0.2170 | 0.43   | 0.0461 | 0.1725 | -0.22  | 0.0251 | 0.1415 | -0.80  | 0.0029 | 0.0548 | -1.17 |
| 3430 Protein FAM49A                 | Q9HQ00     | 0.4108              | 0.5311              | -3.31               | 0.5752              | 0.7436              | -1.75               | 0.5661              | 0.6735              | -1.19      | 0.5388 | 0.6371 | 0.89   | 0.2938 | 0.4298 | -1.88  | 0.9510 | 1.0284 | 0.09   | 0.4700 | 0.5248 | 0.12   | 0.0575 | 0.2291 | -0.33  | 0.0480 | 0.1911 | -0.40 |
| 3431 Protein FAM49B                 | Q8N1Q9     | 0.5445              | 0.6144              | -0.03               | 0.5713              | 0.8847              | 0.09                | 0.9314              | 0.9644              | 0.01       | 0.0244 | 0.0604 | 0.16   | 0.1214 | 0.1054 | -0.19  | 0.0646 | 0.1774 | 0.16   | 0.0145 | 0.3588 | 0.28   | 0.8263 | 1.2705 | -0.02  | 0.8756 | 0.8984 | 0.02  |
| 3432 Protein FAM50A                 | Q14320     | 0.0034              | 0.0380              | 0.19                | 0.0284              | 0.5073              | 0.11                | 0.0078              | 0.0419              | 0.21       | 0.2515 | 0.4010 | 0.06   | 0.1767 | 0.3672 | 0.05   | 0.0052 | 0.0614 | 0.23   | 0.0584 | 0.     |        |        |        |        |        |        |       |

Supplementary Table S2. Overview on all relatively quantified 5180 proteins statistical analysis

| Protein name                                      | UniProt    | MCF-7               |                     |                     |                     | MDA-MB-231          |                     |                     |                     |            |        |        |       |        |        |       |        |        |       |        |        |       |        |        |       |        |        |       |
|---------------------------------------------------|------------|---------------------|---------------------|---------------------|---------------------|---------------------|---------------------|---------------------|---------------------|------------|--------|--------|-------|--------|--------|-------|--------|--------|-------|--------|--------|-------|--------|--------|-------|--------|--------|-------|
|                                                   |            | Dai SC20 vs control | Gen SC20 vs control | SSE SC20 vs control | Dai IC20 vs control | Gen IC20 vs control | SSE IC20 vs control | Dai IC20 vs control | Gen IC20 vs control |            |        |        |       |        |        |       |        |        |       |        |        |       |        |        |       |        |        |       |
| p value                                           | BH q value | log2FC              | p value             | BH q value          | log2FC              | p value             | BH q value          | log2FC              | p value             | BH q value | log2FC |        |       |        |        |       |        |        |       |        |        |       |        |        |       |        |        |       |
| 3473 Protein IIN homolog                          | Q5TKA1     | 0.2763              | 0.4699              | 0.17                | 0.3619              | 0.7098              | -0.13               | 0.8833              | 0.9073              | 0.05       | 0.1547 | 0.2716 | 0.39  | 0.0085 | 0.0659 | 0.88  | 0.0751 | 0.1950 | 0.59  | 0.3736 | 0.5468 | -2.55 | 0.8708 | 1.1185 | -0.33 | 0.0651 | 0.1635 | 2.06  |
| 3474 Protein LLP homolog                          | Q9BRT6     | 0.1366              | 0.2812              | -0.10               | 0.0405              | 0.7050              | -0.15               | 0.1133              | 0.2255              | -0.10      | 0.0073 | 0.0346 | -0.28 | 0.0109 | 0.0747 | -0.31 | 0.0358 | 0.1126 | -0.20 | 0.3736 | 0.5805 | -2.55 | 0.8708 | 1.1784 | -0.33 | 0.0651 | 0.1816 | 2.06  |
| 3475 Protein LSM14A homolog A                     | Q8ND56     | 0.0124              | 0.0648              | -0.20               | 0.9692              | 0.9790              | 0.00                | 0.0163              | 0.0603              | 0.16       | 0.9094 | 0.9215 | 0.00  | 0.1565 | 0.3378 | 0.06  | 0.1028 | 0.2380 | -0.08 | 0.0903 | 0.2416 | 0.19  | 0.2165 | 0.5226 | -0.17 | 0.3742 | 0.4460 | -0.05 |
| 3476 Protein LTV1 homolog                         | Q96AG3     | 0.0102              | 0.0588              | -0.25               | 0.2592              | 0.6637              | -0.19               | 0.0269              | 0.0821              | -0.21      | 0.5993 | 0.6649 | 0.03  | 0.0927 | 0.2400 | -0.19 | 0.0386 | 0.1278 | -0.38 | 0.0927 | 0.9389 | 0.00  | 0.0365 | 0.5480 | -0.48 | 0.2545 | 0.3365 | -0.04 |
| 3477 Protein LYRK                                 | Q861E4     | 0.0011              | 0.0225              | -0.14               | 0.1805              | 0.6650              | 0.22                | 0.0120              | 0.0513              | 0.35       | 0.0002 | 0.0091 | 0.26  | 0.0014 | 0.0292 | 0.27  | 0.0003 | 0.0420 | 0.28  | 0.0120 | 0.1041 | 1.00  | 0.05   | 0.1054 | 0.92  | 0.3121 | 0.3836 | 0.23  |
| 3478 Protein mago nashi homolog                   | P61326     | 0.0100              | 0.0583              | 0.20                | 0.0179              | 0.4683              | 0.17                | 0.0024              | 0.0274              | 0.49       | 0.0039 | 0.0254 | 0.29  | 0.2514 | 0.4694 | 0.05  | 0.1390 | 0.5218 | 0.13  | 0.0425 | 0.1670 | 0.31  | 0.6161 | 1.0501 | 0.02  | 0.0005 | 0.0278 | 0.40  |
| 3479 Protein NAK1A homolog                        | Q9BXY0     | 0.0142              | 0.0693              | 0.30                | 0.0005              | 0.2355              | 0.19                | 0.1118              | 0.2233              | 0.03       | 0.7943 | 0.8227 | -0.01 | 0.8092 | 0.8516 | 0.00  | 0.2632 | 0.4555 | 0.14  | 0.2198 | 0.4411 | -0.25 | 0.0458 | 1.1992 | -0.24 | 0.1202 | 0.2152 | -0.15 |
| 3480 Protein mas                                  | P61244     | 0.4108              | 0.5307              | -3.31               | 0.5752              | 0.7430              | -1.75               | 0.5661              | 0.6730              | -1.19      | 0.5388 | 0.6366 | 0.89  | 0.2938 | 0.4294 | -1.88 | 0.9510 | 1.0278 | 0.09  | 0.1533 | 0.3420 | -0.29 | 0.5405 | 0.9658 | -0.06 | 0.0254 | 0.1355 | 0.37  |
| 3481 Protein NMD12D                               | Q8YB1      | 0.4108              | 0.5305              | -3.31               | 0.5752              | 0.7428              | -1.75               | 0.5661              | 0.6729              | -1.19      | 0.5388 | 0.6365 | 0.89  | 0.2938 | 0.4293 | -1.88 | 0.9510 | 1.0276 | 0.09  | 0.0028 | 0.0585 | -0.38 | 0.0148 | 0.1025 | -0.16 | 0.0677 | 0.1149 | -0.19 |
| 3482 Protein Mdm4                                 | O15151     | 0.0460              | 0.1370              | 0.47                | 0.1638              | 0.6639              | 0.43                | 0.2230              | 0.3804              | 0.23       | 0.0158 | 0.0520 | 0.78  | 0.0806 | 0.2189 | 0.40  | 0.0527 | 0.1552 | 0.44  | 0.2747 | 0.5197 | -0.37 | 0.0776 | 0.2729 | -0.81 | 0.2160 | 0.2848 | -0.65 |
| 3483 Protein MEMO1                                | Q9Y316     | 0.4108              | 0.5304              | -3.31               | 0.5752              | 0.7427              | -1.75               | 0.5661              | 0.6727              | -1.19      | 0.5388 | 0.6363 | 0.89  | 0.2938 | 0.4292 | -1.88 | 0.9510 | 1.0274 | 0.09  | 0.0298 | 0.1470 | 1.32  | 0.0141 | 0.0991 | 1.40  | 0.0752 | 0.1250 | 0.84  |
| 3484 Protein misato homolog 1                     | Q9BUK6     | 0.0608              | 0.1634              | -0.33               | 0.0484              | 0.5737              | -0.41               | 0.0068              | 0.0399              | -0.70      | 0.0212 | 0.0630 | -0.55 | 0.0519 | 0.1689 | -0.41 | 0.0119 | 0.0741 | -0.63 | 0.3736 | 0.6086 | -2.55 | 0.8708 | 1.2277 | -0.33 | 0.0651 | 0.1980 | 2.06  |
| 3485 Protein mono-ADP-ribosyltransferase TIPARP   | Q7Z3E1     | 0.4350              | 0.5123              | 0.26                | 0.3181              | 0.6806              | 0.33                | 0.3200              | 0.5072              | 0.33       | 0.1025 | 0.1977 | 0.72  | 0.8869 | 0.9133 | 0.05  | 0.6735 | 0.9114 | 0.15  | 0.3736 | 0.4463 | -2.55 | 0.8708 | 0.9339 | -0.33 | 0.0651 | 0.1180 | 2.06  |
| 3486 Protein moonraker                            | Q2KHM9     | 0.3411              | 0.5491              | -0.40               | 0.8566              | 0.8968              | 0.02                | 0.0072              | 0.0400              | 0.25       | 0.6277 | 0.6739 | 0.03  | 0.0484 | 0.1616 | -0.15 | 0.1717 | 0.3379 | -0.07 | 0.3736 | 0.5094 | -2.55 | 0.8708 | 1.0507 | -0.33 | 0.0651 | 0.1452 | 2.06  |
| 3487 Protein NDRG1                                | Q92597     | 0.8457              | 0.8772              | 0.01                | 0.5347              | 0.8507              | 0.08                | 0.8990              | 0.9201              | 0.01       | 0.5199 | 0.7249 | -0.02 | 0.0048 | 0.0519 | -0.17 | 0.6493 | 0.8860 | -0.01 | 0.7358 | 0.7745 | 0.06  | 0.1083 | 0.3351 | -0.40 | 0.3185 | 0.3898 | -0.19 |
| 3488 Protein NDRG3                                | Q9UGV2     | 0.0013              | 0.0245              | -1.83               | 0.2632              | 0.6638              | -1.23               | 0.1312              | 0.2526              | -1.64      | 0.0005 | 0.0119 | -3.29 | 0.1407 | 0.3131 | 0.37  | 0.0095 | 0.0694 | -1.54 | 0.0571 | 0.1898 | -0.29 | 0.0901 | 0.2984 | -0.25 | 0.0593 | 0.2177 | -0.34 |
| 3489 Protein Niban                                | Q9BZ08     | 0.4108              | 0.5303              | -3.31               | 0.5752              | 0.7425              | -1.75               | 0.5661              | 0.6726              | -1.19      | 0.5388 | 0.6362 | 0.89  | 0.2938 | 0.4291 | -1.88 | 0.9510 | 1.0271 | 0.09  | 0.0356 | 0.1559 | 0.31  | 0.0969 | 0.3108 | 0.24  | 0.2099 | 0.1474 | 0.42  |
| 3490 Protein NipSnap homolog 1                    | Q9BPW8     | 0.0230              | 0.0905              | 0.21                | 0.2258              | 0.6597              | 0.21                | 0.0187              | 0.0655              | -0.23      | 0.0200 | 0.0604 | 0.18  | 0.6494 | 0.7172 | 0.02  | 0.0295 | 0.1100 | 0.17  | 0.4317 | 0.4876 | 0.07  | 0.0293 | 0.1544 | -0.14 | 0.0076 | 0.0791 | -0.23 |
| 3491 Protein NipSnap homolog 3A                   | O75323     | 0.4108              | 0.5301              | -3.31               | 0.5752              | 0.7423              | -1.75               | 0.5661              | 0.6724              | -1.19      | 0.5388 | 0.6360 | 0.89  | 0.2938 | 0.4289 | -1.88 | 0.9510 | 1.0269 | 0.09  | 0.0955 | 0.2490 | 0.42  | 0.2362 | 0.5526 | -0.17 | 0.1412 | 0.2027 | 0.22  |
| 3492 Protein NipSnap homolog 3B                   | Q9UFN0     | 0.2005              | 0.3713              | -0.20               | 0.0028              | 0.2545              | -0.52               | 0.1883              | 0.3343              | -0.11      | 0.0069 | 0.0335 | -0.53 | 0.0199 | 0.1010 | -0.42 | 0.5802 | 0.8147 | -0.05 | 0.4207 | 0.4764 | -0.16 | 0.1849 | 0.4744 | -0.25 | 0.8015 | 0.8381 | -0.07 |
| 3493 Protein NipSnap homolog 3B                   | Q9BS92     | 0.0061              | 0.0467              | -0.21               | 0.9787              | 0.9857              | 0.00                | 0.0066              | 0.0391              | -0.29      | 0.0497 | 0.1147 | -0.12 | 0.0148 | 0.0867 | -0.20 | 0.4947 | 0.7200 | -0.06 | 0.3736 | 0.4607 | -2.55 | 0.8708 | 0.9608 | -0.33 | 0.0651 | 0.1238 | 2.06  |
| 3494 Protein Nima-R1                              | Q9LAS0     | 0.4108              | 0.5300              | -3.31               | 0.5752              | 0.7421              | -1.75               | 0.5661              | 0.6723              | -1.19      | 0.5388 | 0.6359 | 0.89  | 0.2938 | 0.4288 | -1.88 | 0.9510 | 1.0267 | 0.09  | 0.5345 | 0.5866 | -0.06 | 0.1715 | 0.4535 | -0.16 | 0.0967 | 0.9975 | 0.00  |
| 3495 Protein NOXPD1                               | Q8WTE2     | 0.0498              | 0.1929              | -3.31               | 0.5752              | 0.7419              | -1.75               | 0.5661              | 0.6721              | -1.19      | 0.5388 | 0.6358 | 0.89  | 0.2938 | 0.4287 | -1.88 | 0.9510 | 1.0265 | 0.09  | 0.7073 | 0.7485 | -0.17 | 0.9387 | 0.9549 | 0.05  | 0.0147 | 0.1045 | 1.69  |
| 3496 Protein NRH2F2 homolog                       | Q9H7Z3     | 0.0933              | 0.2239              | 0.64                | 0.3161              | 0.6805              | 0.32                | 0.5022              | 0.7246              | -0.22      | 0.1139 | 0.2144 | 0.62  | 0.0070 | 0.0606 | 1.81  | 0.8899 | 1.1265 | -0.05 | 0.3736 | 0.4343 | -2.55 | 0.8708 | 0.9113 | -0.33 | 0.0651 | 0.1132 | 2.06  |
| 3497 Protein numb homolog                         | P49757     | 0.4987              | 0.5725              | -0.05               | 0.2126              | 0.6626              | 0.22                | 0.0072              | 0.0401              | -0.27      | 0.0103 | 0.0408 | 0.17  | 0.0217 | 0.1058 | 0.10  | 0.0063 | 0.0626 | 0.20  | 0.1241 | 0.2965 | 1.16  | 0.2153 | 0.5209 | 0.81  | 0.1199 | 0.1782 | 1.19  |
| 3498 Protein odr-4 homolog                        | Q5SWX8     | 0.5211              | 0.5929              | 0.12                | 0.0417              | 0.5714              | 0.56                | 0.9558              | 0.9646              | -0.01      | 0.1405 | 0.2518 | 0.30  | 0.0368 | 0.1394 | 0.47  | 0.0861 | 0.2138 | 0.37  | 0.3736 | 0.5413 | -2.55 | 0.8708 | 1.086  | -0.33 | 0.0651 | 0.1607 | 2.06  |
| 3499 Protein O-GlcNAcase                          | O60502     | 0.0072              | 0.0501              | 0.40                | 0.1646              | 0.6615              | 3.62                | 0.0201              | 0.0683              | 4.30       | 0.1281 | 0.2338 | 3.60  | 0.6783 | 0.7419 | -0.57 | 0.6103 | 0.8478 | 2.04  | 0.3736 | 0.4517 | -2.55 | 0.8708 | 0.9441 | -0.33 | 0.0651 | 0.1102 | 2.06  |
| 3500 Protein O-glucosyltransferase 2              | Q6UW63     | 0.7352              | 0.7847              | 0.10                | 0.8054              | 0.8598              | 0.07                | 0.1863              | 0.3316              | 0.46       | 0.3391 | 0.5132 | 0.30  | 0.6569 | 0.7229 | 0.13  | 0.8958 | 1.1329 | -0.06 | 0.3736 | 0.4341 | -2.55 | 0.8708 | 0.9109 | -0.33 | 0.0651 | 0.1232 | 2.06  |
| 3501 Protein O-glucosyltransferase 3              | Q7Z4H8     | 0.4108              | 0.5297              | -3.31               | 0.5752              | 0.7417              | -1.75               | 0.5661              | 0.6720              | -1.19      | 0.5388 | 0.6356 | 0.89  | 0.2938 | 0.4286 | -1.88 | 0.9510 | 1.0263 | 0.09  | 0.0027 | 0.0580 | -2.15 | 0.0001 | 0.0133 | -2.90 | 0.0009 | 0.0379 | -2.58 |
| 3502 Protein O-mannosyl-transferase TMT3          | Q6ZXV5     | 0.4108              | 0.5296              | -3.31               | 0.5752              | 0.7415              | -1.75               | 0.5661              | 0.6718              | -1.19      | 0.5388 | 0.6355 | 0.89  | 0.2938 | 0.4285 | -1.88 | 0.9510 | 1.0261 | 0.09  | 0.5897 | 0.6386 | 0.06  | 0.0209 | 0.1249 | -0.24 | 0.0024 | 0.0536 | -0.32 |
| 3503 Protein OS-9                                 | I13438     | 0.0273              | 0.1000              | 0.37                | 0.8159              | 0.8938              | -0.01               | 0.8144              | 0.8495              | 0.02       | 0.5033 | 0.7069 | 0.06  | 0.3988 | 0.4952 | -0.09 | 0.0231 | 0.0973 | 0.37  | 0.0058 | 0.0810 | 0.28  | 0.0218 | 0.1279 | 0.18  | 0.0106 | 0.0908 | 0.29  |
| 3504 Protein PAT1 homolog 1                       | Q86TB9     | 0.5142              | 0.5867              | -0.07               | 0.1078              | 0.6310              | 0.21                | 0.3322              | 0.5230              | 0.08       | 0.0611 | 0.1336 | 0.17  | 0.2986 | 0.3967 | -0.08 | 0.6182 | 0.8542 | 0.03  | 0.1364 | 0.3153 | -0.22 | 0.0139 | 0.0982 | -0.38 | 0.9120 | 0.9294 | -0.01 |
| 3505 Protein PAXX                                 | Q9BUH6     | 0.7916              | 0.8309              | -0.06               | 0.2296              | 0.6611              | -0.12               | 0.0684              | 0.1546              | -0.44      | 0.0302 | 0.0806 | -0.23 | 0.2055 | 0.4071 | -0.10 | 0.3590 | 0.5651 | -0.07 | 0.3736 | 0.4733 | -2.55 | 0.8708 | 0.9842 | -0.33 | 0.0651 | 0.1292 | 2.06  |
| 3506 Protein PBD1C1                               | Q9BVG4     | 0.0136              | 0.0681              | 0.30                | 0.2656              | 0.6634              | 0.21                | 0.1274              | 0.2474              | 0.09       | 0.0375 | 0.0937 | 0.16  | 0.7701 | 0.8211 | 0.01  | 0.1492 | 0.3062 | 0.20  | 0.1604 | 0.3534 | 0.21  | 0.7245 | 1.1699 | 0.03  | 0.0247 | 0.3365 | -0.07 |
| 3507 Protein pelota homolog                       | Q9BRX2     | 0.1379              | 0.2826              | 0.17                | 0.6215              | 0.7189              | -0.08               | 0.1241              | 0.2427              | 0.20       | 0.0447 | 0.1061 | 0.31  | 0.0362 | 0.1382 | 0.35  | 0.4694 | 0.6919 | -0.09 | 0.1015 | 0.2579 | 0.39  | 0.0593 | 0.2325 | 0.49  | 0.0241 | 0.1322 | 0.76  |
| 3508 Protein phosphatase 1 regulatory subunit 12A | I14974     | 0.0552              | 0.1538              | 0.10                | 0.2831              | 0.6636              | 0.21                | 0.0451              | 0.1165              | 0.16       | 0.1006 | 0.0412 | 0.18  | 0.0480 | 0.1608 | 0.10  | 0.0901 | 0.2189 | 0.09  | 0.7807 | 0.8143 | 0.04  | 0.0413 | 0.2725 | 0.07  | 0.3639 | 0.4533 | -0.07 |
| 3509 Protein phosphatase 1 regulatory subunit 14B | Q96C90     | 0.0020              | 0.0309              | -0.26               | 0.4467              | 0.7820              | 0.10                | 0.0470              | 0.1202              | -0.06      | 0.0009 | 0.0147 | -0.21 | 0.2864 | 0.5160 | -0.02 | 0.0652 | 0.1781 | -0.29 | 0.0065 | 0.0846 | -0.31 | 0.3136 | 0.6622 | -0.03 | 0.2409 | 0.3111 | -0.07 |
| 3510 Protein phosphatase 1 regulatory subunit 26  | Q2T8A7     | 0.2184              | 0.3943              | 0.07                | 0.0681              | 0.5919              | 0.20                | 0.1922              | 0.3396              | 0.09       | 0.0095 | 0.0390 | 0.38  | 0.2051 | 0.4066 | 0.07  | 0.0312 | 0.1536 | 0.18  | 0.3736 | 0.5600 | -2.55 | 0.8708 | 1.1420 | -0.33 | 0.0651 | 0.1704 | 2.06  |
| 3511 Protein phosphatase 1 regulatory subunit 3C  | Q9UOK1     | 0.0085              | 0.0546              | -0.25               | 0.0182              | 0.4667              | 0.33                | 0.0048              | 0.0339              | 0.27       | 0.0598 | 0.1315 | -0.12 | 0.4315 | 0.5858 | 0.04  | 0.0355 | 0.1216 |       |        |        |       |        |        |       |        |        |       |

Supplementary Table S2. Overview on all relatively quantified 5180 proteins statistical analysis

|      | Protein name                                                                    | UniProt | MCF-7               |            |                     |         | MDA-MB-231          |            |                     |         |
|------|---------------------------------------------------------------------------------|---------|---------------------|------------|---------------------|---------|---------------------|------------|---------------------|---------|
|      |                                                                                 |         | Dai SC20 vs control |            | Gen SC20 vs control |         | Dai IC20 vs control |            | Gen IC20 vs control |         |
|      |                                                                                 |         | p value             | BH q value | log2FC              | p value | p value             | BH q value | log2FC              | p value |
| 3557 | Protein SOGA3                                                                   | Q5TF21  | 0.4108              | 0.5286     | -3.31               | 0.5752  | 0.7401              | -1.75      | 0.5661              | 0.6706  |
| 3558 | Protein SOX-15                                                                  | Q60248  | 0.7209              | 0.7719     | -0.03               | 0.6752  | 0.6626              | 0.25       | 0.1135              | 0.2258  |
| 3559 | Protein spore homolog 2                                                         | Q8WDL2  | 0.1001              | 0.2251     | 0.15                | 0.2218  | 0.6577              | -1.19      | 0.3848              | 0.5856  |
| 3560 | Protein SPT2 homolog                                                            | Q68D10  | 0.4108              | 0.5284     | -3.31               | 0.5752  | 0.7399              | -1.75      | 0.5661              | 0.6704  |
| 3561 | Protein SSC4                                                                    | Q60224  | 0.4108              | 0.5283     | -3.31               | 0.5752  | 0.7397              | -1.75      | 0.5661              | 0.6703  |
| 3562 | Protein TALPID3                                                                 | Q9BVV6  | 0.0092              | 0.0568     | -0.50               | 0.1727  | 0.6612              | -0.27      | 0.1653              | 0.3023  |
| 3563 | Protein TM53                                                                    | Q96M34  | 0.4108              | 0.5282     | -3.31               | 0.5752  | 0.7395              | -1.75      | 0.5661              | 0.6701  |
| 3564 | Protein TESPA1                                                                  | A2RU30  | 0.4108              | 0.5280     | -3.31               | 0.5752  | 0.7393              | -1.75      | 0.5661              | 0.6700  |
| 3565 | Protein TFG                                                                     | Q92734  | 0.0030              | 0.0363     | 0.29                | 0.1075  | 0.6306              | 0.30       | 0.0065              | 0.0389  |
| 3566 | Protein TMED8                                                                   | Q6PL24  | 0.4108              | 0.5279     | -3.31               | 0.5752  | 0.7392              | -1.75      | 0.5661              | 0.6698  |
| 3567 | Protein TOPAZ1                                                                  | Q8N9V7  | 0.0082              | 0.0536     | -0.60               | 0.5341  | 0.8500              | -0.16      | 0.1095              | 0.2196  |
| 3568 | Protein transport protein Sec16A                                                | I15027  | 0.0924              | 0.2136     | -0.07               | 0.8227  | 0.8733              | -0.02      | 0.3768              | 0.5761  |
| 3569 | Protein transport protein Sec23A                                                | Q15436  | 0.4967              | 0.5710     | -0.11               | 0.1085  | 0.6301              | -0.12      | 0.0509              | 0.1269  |
| 3570 | Protein transport protein Sec23B                                                | Q15437  | 0.1030              | 0.2296     | 0.03                | 0.1205  | 0.6376              | 0.06       | 0.0001              | 0.0167  |
| 3571 | Protein transport protein Sec24B                                                | O95487  | 0.0549              | 0.1533     | -0.22               | 0.0420  | 0.5710              | -0.20      | 0.0700              | 0.1574  |
| 3572 | Protein transport protein Sec24C                                                | P53992  | 0.0592              | 0.1608     | 0.10                | 0.2611  | 0.6646              | 0.19       | 0.0479              | 0.1214  |
| 3573 | Protein transport protein Sec31A                                                | O94979  | 0.1112              | 0.2423     | -0.09               | 0.1889  | 0.8703              | 0.02       | 0.0720              | 0.1603  |
| 3574 | Protein transport protein Sec61 subunit alpha isoform 1                         | P61619  | 0.0259              | 0.0973     | 0.12                | 0.1782  | 0.6119              | 0.24       | 0.0075              | 0.0411  |
| 3575 | Protein transport protein Sec61 subunit beta                                    | P04668  | 0.0048              | 0.0434     | 0.42                | 0.1513  | 0.6597              | 0.37       | 0.0043              | 0.0326  |
| 3576 | Protein tyrosine phosphatase domain-containing protein 1                        | A2A3K4  | 0.0179              | 0.0785     | 0.29                | 0.9482  | 0.9655              | 0.01       | 0.0029              | 0.0292  |
| 3577 | Protein unc-119 homolog A                                                       | Q13432  | 0.1836              | 0.3482     | -0.08               | 0.2919  | 0.6690              | -0.12      | 0.2653              | 0.4361  |
| 3578 | Protein unc-13 homolog A                                                        | Q9UPW8  | 0.4897              | 0.5637     | -0.13               | 0.6879  | 0.7716              | 0.11       | 0.2484              | 0.4148  |
| 3579 | Protein unc-13 homolog C                                                        | Q8NB66  | 0.0885              | 0.2073     | -0.23               | 0.2788  | 0.6682              | -0.16      | 0.1803              | 0.3241  |
| 3580 | Protein unc-13 homolog D                                                        | Q70J99  | 0.0399              | 0.1258     | -0.43               | 0.5894  | 0.6948              | -0.30      | 0.0515              | 0.1275  |
| 3581 | Protein unc-45 homolog A                                                        | Q9H3U1  | 0.0030              | 0.0032     | 0.14                | 0.1198  | 0.6358              | 0.22       | 0.0040              | 0.0322  |
| 3582 | Protein unc-79 homolog                                                          | Q9P2D8  | 0.4108              | 0.5278     | -3.31               | 0.5752  | 0.7399              | -1.75      | 0.5661              | 0.6697  |
| 3583 | Protein unc-80 homolog                                                          | Q8N2C7  | 0.2423              | 0.4275     | 0.14                | 0.4022  | 0.7450              | 0.15       | 0.0067              | 0.0394  |
| 3584 | Protein Wnt-1                                                                   | O96014  | 0.0144              | 0.0697     | 0.18                | 0.0176  | 0.4699              | 0.53       | 0.0015              | 0.0233  |
| 3585 | Protein Wnt-5b                                                                  | Q9H1J7  | 0.4108              | 0.5276     | -3.31               | 0.5752  | 0.7388              | -1.75      | 0.5661              | 0.6695  |
| 3586 | Protein XRP2                                                                    | U75695  | 0.4108              | 0.5275     | -3.31               | 0.5752  | 0.7386              | -1.75      | 0.5661              | 0.6693  |
| 3587 | Protein yippee-like 5                                                           | P62699  | 0.4108              | 0.5274     | -3.31               | 0.5752  | 0.7384              | -1.75      | 0.5661              | 0.6692  |
| 3588 | Protein zer-1 homolog                                                           | Q7Z7L7  | 0.4108              | 0.5272     | -3.31               | 0.5752  | 0.7382              | -1.75      | 0.5661              | 0.6690  |
| 3589 | Protein/nucleic acid dephycase DJ-1                                             | Q99497  | 0.0014              | 0.0252     | 0.42                | 0.1806  | 0.6649              | 0.28       | 0.0024              | 0.0271  |
| 3590 | Protein-arginine deiminase type-2                                               | Q9Y2J8  | 0.4108              | 0.5271     | -3.31               | 0.5752  | 0.7381              | -1.75      | 0.5661              | 0.6689  |
| 3591 | Protein-arginine deiminase type-4                                               | Q9UM07  | 0.0088              | 0.0556     | -0.28               | 0.1059  | 0.6339              | -0.32      | 0.0100              | 0.0468  |
| 3592 | Protein-activated receptor 1                                                    | P25116  | 0.4108              | 0.5270     | -3.31               | 0.5752  | 0.7379              | -1.75      | 0.5661              | 0.6687  |
| 3593 | Protein-glutamate O-methyltransferase                                           | Q80893  | 0.0002              | 0.0130     | -0.48               | 0.8693  | 0.9051              | -0.01      | 0.0095              | 0.0181  |
| 3594 | Protein-glutamine gamma-glutamyltransferase 2                                   | P21980  | 0.4108              | 0.5268     | -3.31               | 0.5752  | 0.7377              | -1.75      | 0.5661              | 0.6686  |
| 3595 | Protein-glutamine gamma-glutamyltransferase 4                                   | P49221  | 0.4108              | 0.5267     | -3.31               | 0.5752  | 0.7375              | -1.75      | 0.5661              | 0.6684  |
| 3596 | Protein-L-isoaspartate O-methyltransferase domain-containing protein 2          | Q9NV79  | 0.7203              | 0.7714     | 0.04                | 0.5610  | 0.8750              | -0.43      | 0.0968              | 0.1993  |
| 3597 | Protein-L-isoaspartate(D-aspartate) O-methyltransferase                         | P22061  | 0.0035              | 0.0379     | -0.08               | 0.1093  | 0.6305              | -0.08      | 0.0006              | 0.0201  |
| 3598 | Protein-tyrosine kinase 6                                                       | Q13882  | 0.0600              | 0.1620     | 0.20                | 0.0354  | 0.5393              | 0.32       | 0.0023              | 0.0270  |
| 3599 | Proteolipid protein 2                                                           | Q04941  | 0.0022              | 0.0317     | 0.37                | 0.1131  | 0.6347              | 0.19       | 0.0364              | 0.1000  |
| 3600 | Prothymosin alpha                                                               | P06454  | 0.1676              | 0.3259     | 0.11                | 0.0780  | 0.6122              | 0.59       | 0.0042              | 0.0324  |
| 3601 | Protocadherin alpha-1                                                           | Q9Y5I3  | 0.4108              | 0.5266     | -3.31               | 0.5752  | 0.7373              | -1.75      | 0.5661              | 0.6683  |
| 3602 | Protocadherin alpha-10                                                          | Q9Y5I2  | 0.4108              | 0.5265     | -3.31               | 0.5752  | 0.7371              | -1.75      | 0.5661              | 0.6681  |
| 3603 | Protocadherin alpha-9                                                           | Q9Y5I5  | 0.4108              | 0.5263     | -3.31               | 0.5752  | 0.7370              | -1.75      | 0.5661              | 0.6680  |
| 3604 | Protocadherin beta-1                                                            | Q9Y5F3  | 0.4108              | 0.5262     | -3.31               | 0.5752  | 0.7368              | -1.75      | 0.5661              | 0.6678  |
| 3605 | Protocadherin beta-14                                                           | Q9Y5E9  | 0.9756              | 0.9834     | 0.00                | 0.3596  | 0.7083              | -0.22      | 0.4964              | 0.7183  |
| 3606 | Protocadherin beta-6                                                            | Q9Y5E3  | 0.1281              | 0.2683     | -0.38               | 0.1836  | 0.6646              | -0.32      | 0.9899              | 0.9910  |
| 3607 | Protocadherin beta-8                                                            | Q9UN66  | 0.0173              | 0.0769     | -0.37               | 0.6812  | 0.7668              | -0.12      | 0.0016              | 0.0228  |
| 3608 | Protocadherin Fat 2                                                             | Q9NYQ8  | 0.4598              | 0.5368     | 0.04                | 0.0193  | 0.4672              | -0.17      | 0.1126              | 0.2245  |
| 3609 | Protocadherin Fat 3                                                             | Q8TDW7  | 0.2321              | 0.4139     | 0.07                | 0.7313  | 0.8043              | 0.01       | 0.9883              | 0.9900  |
| 3610 | Protocadherin gamma-C3                                                          | Q9UN70  | 0.4108              | 0.5261     | -3.31               | 0.5752  | 0.7366              | -1.75      | 0.5661              | 0.6677  |
| 3611 | Proto-oncogene c-Rel                                                            | Q04864  | 0.0113              | 0.0609     | -0.33               | 0.1747  | 0.6615              | -2.72      | 0.0224              | 0.0733  |
| 3612 | Proto-oncogene DBL                                                              | P10911  | 0.0025              | 0.0334     | 0.28                | 0.2667  | 0.6632              | 0.26       | 0.0087              | 0.0438  |
| 3613 | Proto-oncogene tyrosine-protein kinase receptor Ret                             | P07949  | 0.4108              | 0.5259     | -3.31               | 0.5752  | 0.7364              | -1.75      | 0.5661              | 0.6675  |
| 3614 | Proto-oncogene tyrosine-protein kinase Src                                      | P12931  | 0.0004              | 0.0161     | -0.34               | 0.3250  | 0.6855              | 0.11       | 0.0004              | 0.0185  |
| 3615 | Pseudouridylate synthase 7 homolog                                              | Q96PZ0  | 0.1066              | 0.2351     | -0.05               | 0.9292  | 0.9252              | 0.01       | 0.3192              | 0.5064  |
| 3616 | Pterin-4-alpha-carbinolamine dehydratase                                        | P61457  | 0.0054              | 0.0443     | 0.08                | 0.2549  | 0.6622              | 0.14       | 0.0820              | 0.1760  |
| 3617 | Pterin-4-alpha-carbinolamine dehydratase 2                                      | Q9H0N5  | 0.4108              | 0.5258     | -3.31               | 0.5752  | 0.7362              | -1.75      | 0.5661              | 0.6674  |
| 3618 | Pulmonary surfactant-associated protein A2                                      | Q8RWL1  | 0.4108              | 0.5257     | -3.31               | 0.5752  | 0.7361              | -1.75      | 0.5661              | 0.6672  |
| 3619 | Pumilio homolog 1                                                               | Q14671  | 0.0363              | 0.1195     | 0.34                | 0.0984  | 0.6348              | 0.23       | 0.0073              | 0.0405  |
| 3620 | Purine nucleoside phosphorylase                                                 | P00491  | 0.1420              | 0.2883     | 0.08                | 0.4590  | 0.7910              | -0.05      | 0.0014              | 0.0221  |
| 3621 | Puromycin-sensitive aminopeptidase                                              | P55786  | 0.1176              | 0.2521     | 0.09                | 0.3067  | 0.6784              | 0.17       | 0.0440              | 0.1144  |
| 3622 | Puromycin-sensitive aminopeptidase-like protein                                 | A6NEC2  | 0.1237              | 0.2611     | 0.20                | 0.5680  | 0.8822              | 0.07       | 0.6809              | 0.7304  |
| 3623 | Putative 40S ribosomal protein S26-like 1                                       | Q3JN25  | 0.6212              | 0.6848     | -0.01               | 0.4213  | 0.7593              | -0.26      | 0.0056              | 0.0361  |
| 3624 | Putative 60S ribosomal protein L13a protein RPL13AP3                            | Q6NVV1  | 0.0363              | 0.1194     | -0.25               | 0.2283  | 0.7399              | -0.36      | 0.1478              | 0.2760  |
| 3625 | Putative activator of 90 kDa heat shock protein ATPase homolog 2                | Q71990  | 0.4108              | 0.5255     | -3.31               | 0.5752  | 0.7359              | -1.75      | 0.5661              | 0.6671  |
| 3626 | Putative ankyrin repeat domain-containing protein 31                            | Q8NTZ5  | 0.4435              | 0.5212     | -0.03               | 0.2761  | 0.6646              | 0.18       | 0.0097              | 0.0459  |
| 3627 | Putative ATP-dependent RNA helicase DDX12                                       | Q92771  | 0.4108              | 0.5254     | -3.31               | 0.5752  | 0.7357              | -1.75      | 0.5661              | 0.6669  |
| 3628 | Putative beta-actin-like protein 3                                              | Q9BYX7  | 0.2152              | 0.3900     | -0.03               | 0.0239  | 0.4874              | -0.19      | 0.0204              | 0.0688  |
| 3629 | Putative chaperone multivesicular body protein 4B-like protein CHMP4BP1         | P59074  | 0.4108              | 0.5253     | -3.31               | 0.5752  | 0.7355              | -1.75      | 0.5661              | 0.6668  |
| 3630 | Putative ciliary rootlet coiled-coil protein 2                                  | HTBZ55  | 0.7631              | 0.8074     | 0.03                | 0.4881  | 0.8114              | -0.30      | 0.3362              | 0.5287  |
| 3631 | Putative ciliary rootlet coiled-coil protein-like 2 protein                     | Q8IVF0  | 0.0052              | 0.0439     | 0.20                | 0.0212  | 0.6609              | 0.20       | 0.0054              | 0.0358  |
| 3632 | Putative cleavage and polyadenylation specificity factor subunit 4-like protein | A6NMK7  | 0.4108              | 0.5252     | -3.31               | 0.5752  | 0.7353              | -1.75      | 0.5661              | 0.6666  |
| 3633 | Putative CNGA1-overlapping antisense gene protein                               | Q8IZM0  | 0.3012              | 0.5004     | -0.14               | 0.5091  | 0.8311              | -0.09      | 0.3392              | 0.5315  |



Supplementary Table S2. Overview on all relatively quantified 5180 proteins statistical analysis

|      | Protein name                                                                                  | UniProt   | MCF-7               |            |                     |         | MDA-MB-231          |        |                     |            |
|------|-----------------------------------------------------------------------------------------------|-----------|---------------------|------------|---------------------|---------|---------------------|--------|---------------------|------------|
|      |                                                                                               |           | Dai SC20 vs control |            | Gen SC20 vs control |         | SSE SC20 vs control |        | Dai IC20 vs control |            |
|      |                                                                                               |           | p value             | BH q value | log2FC              | p value | BH q value          | log2FC | p value             | BH q value |
| 3634 | Putative coiled-coil domain-containing protein 144C                                           | Q8Y1A2    | 0.3884              | 0.6053     | -1.15               | 0.1751  | 0.6606              | -2.00  | 0.1812              | 0.3251     |
| 3635 | Putative coiled-coil-helix-coiled-coil-helix domain-containing protein CHCHD2P9_mitochondrial | Q5T1J5    | 0.4108              | 0.5250     | -3.31               | 0.5752  | 0.7351              | -1.75  | 0.5661              | 0.6665     |
| 3636 | Putative cTAGE family member 3                                                                | Q8IX95    | 0.0037              | 0.0387     | -0.79               | 0.4468  | 0.7819              | -0.13  | 0.0028              | 0.0290     |
| 3637 | Putative dehydrogenase/reductase SDR family member 4-like 1                                   | P0CG22    | 0.2004              | 0.3713     | 0.26                | 0.4674  | 0.7975              | 0.13   | 0.0615              | 0.1441     |
| 3638 | Putative deoxyribonuclease TATDN1                                                             | Q6P1N9    | 0.0150              | 0.0710     | 0.08                | 0.0913  | 0.6289              | 0.27   | 0.0186              | 0.0655     |
| 3639 | Putative deoxyribonuclease TATDN2                                                             | Q93075    | 0.0001              | 0.0098     | 1.38                | 0.0020  | 0.2302              | 0.32   | 0.0008              | 0.0224     |
| 3640 | Putative dimethylamine monoxygenase [N-oxide-forming] 6                                       | O60774    | 0.0154              | 0.0718     | -2.18               | 0.3297  | 0.6889              | -1.30  | 0.1496              | 0.2788     |
| 3641 | Putative E3 ubiquitin-protein ligase makorin-4                                                | Q13434    | 0.3270              | 0.5330     | -0.15               | 0.1165  | 0.6359              | 0.33   | 0.0751              | 0.1646     |
| 3642 | Putative E3 ubiquitin-protein ligase UBR7                                                     | Q8N806    | 0.8996              | 0.9211     | -0.01               | 0.1176  | 0.6306              | -0.15  | 0.0561              | 0.1354     |
| 3643 | Putative elongation factor 1-alpha-like 3                                                     | Q5VTE0    | 0.0134              | 0.0675     | 0.25                | 0.2621  | 0.6639              | 0.20   | 0.0020              | 0.0250     |
| 3644 | Putative endoplasmic-like protein                                                             | Q58FF3    | 0.9656              | 0.9746     | -0.01               | 0.0951  | 0.6291              | 0.32   | 0.1295              | 0.2504     |
| 3645 | Putative fatty acid-binding protein 5-like protein 3                                          | ARMU11    | 0.0382              | 0.1225     | 0.16                | 0.9932  | 0.9955              | 0.00   | 0.0663              | 0.1356     |
| 3646 | Putative ferritin heavy polypeptide-like 19                                                   | POC7X4    | 0.0921              | 0.2131     | 0.13                | 0.1334  | 0.6482              | 0.25   | 0.1433              | 0.2695     |
| 3647 | Putative GEF domain-containing protein DNM1P46                                                | O6ZS02    | 0.4108              | 0.5249     | -3.31               | 0.5752  | 0.7350              | -1.75  | 0.5661              | 0.6665     |
| 3648 | Putative golgin subfamily A member 8l                                                         | A6NC78    | 0.4108              | 0.5248     | -3.31               | 0.5752  | 0.7348              | -1.75  | 0.5661              | 0.6665     |
| 3649 | Putative heat shock 70 kDa protein 7                                                          | P48741    | 0.4095              | 0.0573     | -0.67               | 0.0183  | 0.4647              | -0.57  | 0.0002              | 0.0241     |
| 3650 | Putative heat shock protein HSP 90-alpha A4                                                   | Q58FG1    | 0.0111              | 0.0604     | 0.22                | 0.2643  | 0.6640              | 0.09   | 0.0050              | 0.0345     |
| 3651 | Putative heat shock protein HSP 90-alpha A5                                                   | Q58FG0    | 0.2988              | 0.4975     | 0.12                | 0.8302  | 0.8790              | 0.04   | 0.0542              | 0.1323     |
| 3652 | Putative heat shock protein HSP 90-beta 2                                                     | Q58FF8    | 0.0978              | 0.2215     | 0.12                | 0.3141  | 0.6799              | 0.22   | 0.0225              | 0.0735     |
| 3653 | Putative heat shock protein HSP 90-beta 4                                                     | Q58FF6    | 0.8760              | 0.9023     | 0.00                | 0.7155  | 0.7914              | 0.01   | 0.9842              | 0.9871     |
| 3654 | Putative heat shock protein HSP 90-beta 3                                                     | Q58FF7    | 0.0170              | 0.0762     | 0.30                | 0.2558  | 0.6622              | 0.15   | 0.0972              | 0.1998     |
| 3655 | Putative hexokinase HKDC1                                                                     | Q2TB90    | 0.0000              | 0.0000     | 0.52                | 0.1026  | 0.6327              | 0.33   | 0.0060              | 0.0375     |
| 3656 | Putative high mobility group protein B1-like 1                                                | B2RPK0    | 0.9622              | 0.9721     | 0.04                | 0.2690  | 0.6629              | 1.08   | 0.8722              | 0.8991     |
| 3657 | Putative HLA class I histocompatibility antigen alpha chain H                                 | P01893    | 0.0328              | 0.1129     | 0.31                | 0.0896  | 0.6238              | 0.33   | 0.1319              | 0.2538     |
| 3658 | Putative homeodomain transcription factor 1                                                   | Q9UMS5    | 0.0650              | 0.1687     | 0.13                | 0.3835  | 0.7306              | 0.15   | 0.2711              | 0.4441     |
| 3659 | Putative hydrolase RBBP9                                                                      | OT5884    | 0.4108              | 0.5246     | -3.31               | 0.5752  | 0.7346              | -1.75  | 0.5661              | 0.6660     |
| 3660 | Putative inactive cathepsin L-like protein CTSL3P                                             | Q5NE16    | 0.9940              | 0.9950     | 0.00                | 0.1725  | 0.6609              | -1.27  | 0.5305              | 0.7518     |
| 3661 | Putative keratin-87 protein                                                                   | A6NCN2    | 0.9661              | 0.9749     | 0.00                | 0.0916  | 0.6285              | -0.47  | 0.2599              | 0.0802     |
| 3662 | Putative lipocalin 1-like protein 1                                                           | Q5VSP4    | 0.0016              | 0.0271     | 1.54                | 0.0503  | 0.5759              | 1.41   | 0.0024              | 0.0273     |
| 3663 | Putative methyltransferase-like protein 15P1                                                  | POC7V9    | 0.8260              | 0.8606     | -0.03               | 0.5575  | 0.8709              | 0.10   | 0.0831              | 0.1777     |
| 3664 | Putative monooxygenase p33MONOX                                                               | Q96A73    | 0.1363              | 0.2807     | -0.14               | 0.4888  | 0.8123              | -0.84  | 0.1407              | 0.2660     |
| 3665 | Putative nascent polypeptide-associated complex subunit alpha-like protein                    | Q9BZK3    | 0.2559              | 0.4436     | 1.71                | 0.3681  | 0.7168              | 1.26   | 0.4109              | 0.6171     |
| 3666 | Putative oncomodulin-2                                                                        | P0CE71    | 0.2430              | 0.4284     | -0.22               | 0.5250  | 0.8440              | -0.37  | 0.5135              | 0.7344     |
| 3667 | Putative peptidyl-RNA hydrolase PTRHD1                                                        | Q6GMV3    | 0.0010              | 0.0217     | -0.34               | 0.7766  | 0.8390              | -0.02  | 0.0367              | 0.1005     |
| 3668 | Putative PIP5K1A and PSMΔ4-like protein                                                       | A2A3N6    | 0.0092              | 0.0567     | -0.41               | 0.0101  | 0.4472              | -0.35  | 0.0633              | 0.0999     |
| 3669 | Putative postmeiotic segregation increased 2-like protein 1                                   | A4D2B8    | 0.2320              | 0.4138     | -1.99               | 0.1759  | 0.6622              | -3.09  | 0.0430              | 0.1127     |
| 3670 | Putative postmeiotic segregation increased 2-like protein 3                                   | Q13401    | 0.0098              | 0.0578     | -1.43               | 0.5253  | 0.8437              | -0.09  | 0.0297              | 0.0874     |
| 3671 | Putative PRAME family member 13                                                               | Q5VWM6    | 0.8243              | 0.8593     | -0.03               | 0.5126  | 0.8350              | 0.08   | 0.0464              | 0.1192     |
| 3672 | Putative protein FAM104A                                                                      | Q8RIZP    | 0.4108              | 0.5245     | -3.31               | 0.5752  | 0.7344              | -1.75  | 0.5661              | 0.6658     |
| 3673 | Putative protein FAM10A5                                                                      | Q8NF61    | 0.0901              | 0.2101     | -0.13               | 0.6047  | 0.7076              | -0.09  | 0.1324              | 0.2545     |
| 3674 | Putative protein FAM45B                                                                       | O6NSW5    | 0.5338              | 0.6044     | -0.09               | 0.7489  | 0.8451              | -0.02  | 0.9126              | 0.9313     |
| 3675 | Putative protein PLEKHA9                                                                      | O95397    | 0.4108              | 0.5244     | -3.31               | 0.5752  | 0.7342              | -1.75  | 0.5661              | 0.6657     |
| 3676 | Putative protein SSX6                                                                         | Q7RTT6    | 0.4108              | 0.5243     | -3.31               | 0.5752  | 0.7341              | -1.75  | 0.5661              | 0.6655     |
| 3677 | Putative protein SSX9                                                                         | Q7RTT3    | 0.4108              | 0.5241     | -3.31               | 0.5752  | 0.7339              | -1.75  | 0.5661              | 0.6654     |
| 3678 | Putative protein ZNF151                                                                       | AKS554    | 0.4108              | 0.5240     | -3.31               | 0.5752  | 0.7337              | -1.75  | 0.5661              | 0.6652     |
| 3679 | Putative pyridoxal-dependent decarboxylase domain-containing protein 2                        | Q6P474    | 0.0368              | 0.1207     | 0.21                | 0.7500  | 0.8188              | -0.05  | 0.8109              | 0.8467     |
| 3680 | Putative Ras-related protein Rab-1C                                                           | Q92928    | 0.0169              | 0.0759     | 0.47                | 0.0545  | 0.5869              | 0.43   | 0.0617              | 0.1444     |
| 3681 | Putative RNA polymerase II subunit B1 CTD phosphatase RPA2                                    | Q8IXW5    | 0.4108              | 0.5239     | -3.31               | 0.5752  | 0.7335              | -1.75  | 0.5661              | 0.6651     |
| 3682 | Putative RNA-binding protein Luc7-like 1                                                      | Q9NQ29    | 0.1295              | 0.2705     | 0.14                | 0.4541  | 0.7872              | 0.10   | 0.0801              | 0.1728     |
| 3683 | Putative RNA-binding protein Luc7-like 2                                                      | Q9Y383    | 0.1609              | 0.3162     | 0.08                | 0.2663  | 0.6783              | 0.20   | 0.0248              | 0.0781     |
| 3684 | Putative small nuclear ribonucleoprotein G-like protein 15                                    | AKMWD9    | 0.2281              | 0.4083     | -0.40               | 0.2623  | 0.6634              | -1.05  | 0.0423              | 0.1115     |
| 3685 | Putative testis-expressed protein 13C                                                         | AA0A9YWL9 | 0.0345              | 0.1162     | -0.24               | 0.3237  | 0.6858              | -0.14  | 0.0182              | 0.0647     |
| 3686 | Putative trace amine-associated receptor 3                                                    | Q9P1P4    | 0.1848              | 0.3497     | -1.54               | 0.3619  | 0.7101              | -2.04  | 0.0580              | 0.1426     |
| 3687 | Putative tRNA pseudouridine synthase Pus-10                                                   | Q3MIT2    | 0.0105              | 0.0592     | 0.26                | 0.7598  | 0.8263              | -0.03  | 0.0089              | 0.0439     |
| 3688 | Putative tubulin-like protein alpha-4B                                                        | Q9H853    | 0.9799              | 0.9862     | -0.01               | 0.7274  | 0.8012              | -0.22  | 0.5827              | 0.6498     |
| 3689 | Putative ubiquitin-conjugating enzyme E2-N-like                                               | Q5XJB2    | 0.0481              | 0.1411     | 0.13                | 0.1178  | 0.6310              | 0.34   | 0.0900              | 0.0443     |
| 3690 | Putative ubiquitin-conjugating enzyme E2Q2-like protein                                       | HOY1L9    | 0.1290              | 0.2699     | 0.07                | 0.4640  | 0.7960              | 0.09   | 0.0771              | 0.1677     |
| 3691 | Putative uncharacterized protein C22orf34                                                     | Q6ZV56    | 0.4108              | 0.5237     | -3.31               | 0.5752  | 0.7333              | -1.75  | 0.5661              | 0.6649     |
| 3692 | Putative uncharacterized protein C9orf129                                                     | Q5T035    | 0.0048              | 0.0433     | -0.30               | 0.9476  | 0.9653              | 0.00   | 0.0034              | 0.0307     |
| 3693 | Putative uncharacterized protein encoded by LINC00114                                         | Q6XXX2    | 0.2257              | 0.4044     | -0.30               | 0.4271  | 0.7592              | -0.57  | 0.5621              | 0.7865     |
| 3694 | Putative uncharacterized protein encoded by LINC00471                                         | Q8NS55    | 0.3917              | 0.6088     | -0.06               | 0.3238  | 0.6852              | -0.08  | 0.0659              | 0.1503     |
| 3695 | Putative uncharacterized protein encoded by MIR7-3HG                                          | Q8NGC7    | 0.0560              | 0.1547     | -12.47              | 0.4473  | 0.0566              | -10.36 | 0.0005              | 0.0121     |
| 3696 | Putative uncharacterized protein FL45721                                                      | Q6ZS92    | 0.2742              | 0.4674     | 0.18                | 0.3261  | 0.6856              | -0.34  | 0.3951              | 0.5976     |
| 3697 | Putative uncharacterized protein FL45831                                                      | Q6ZS49    | 0.4108              | 0.5236     | -3.31               | 0.5752  | 0.7332              | -1.75  | 0.5661              | 0.6648     |
| 3698 | Putative uncharacterized protein KTN1-AS1                                                     | Q6B5Y8    | 0.4108              | 0.5235     | -3.31               | 0.5752  | 0.7330              | -1.75  | 0.5661              | 0.6646     |
| 3699 | Putative uncharacterized protein LOC10128429                                                  | Q6ZWV4    | 0.1397              | 0.2848     | -2.72               | 0.1924  | 0.6680              | -2.14  | 0.4073              | 0.6126     |
| 3700 | Putative uncharacterized protein LOC10128554                                                  | QOVFX4    | 0.4108              | 0.5234     | -3.31               | 0.5752  | 0.7328              | -1.75  | 0.5661              | 0.6645     |
| 3701 | Putative uncharacterized protein MGC13053                                                     | Q9BRP9    | 0.4108              | 0.5232     | -3.31               | 0.5752  | 0.7326              | -1.75  | 0.5661              | 0.1082     |
| 3702 | Putative uncharacterized protein MYRPRG-AS1                                                   | Q2M3A8    | 0.0213              | 0.0868     | 0.29                | 0.1571  | 0.6621              | 0.18   | 0.1277              | 0.2477     |
| 3703 | Putative uncharacterized protein MYH16                                                        | Q9H6N6    | 0.4108              | 0.5231     | -3.31               | 0.5752  | 0.7324              | -1.75  | 0.5661              | 0.6643     |
| 3704 | Putative uncharacterized SMG1-like protein                                                    | Q6P435    | 0.5562              | 0.6252     | -0.07               | 0.6418  | 0.7360              | 0.03   | 0.0677              | 0.1533     |

Supplementary Table S2. Overview on all relatively quantified 5180 proteins statistical analysis

| Protein name                                                                              | UniProt | MCF-7               |            |                     |         | MDA-MB-231          |        |                     |            |
|-------------------------------------------------------------------------------------------|---------|---------------------|------------|---------------------|---------|---------------------|--------|---------------------|------------|
|                                                                                           |         | Dai SC20 vs control |            | Gen SC20 vs control |         | Dai IC20 vs control |        | Gen IC20 vs control |            |
|                                                                                           |         | p value             | BH q value | log2FC              | p value | BH q value          | log2FC | p value             | BH q value |
| 3705 Putative UPF0607 protein ENSP0000383783                                              | AKRMU18 | 0.0101              | 0.0585     | -0.41               | 0.0592  | 0.5909              | -0.27  | 0.1382              | 0.2623     |
| 3706 Putative UPF0633 protein LOC554249                                                   | USXG85  | 0.7605              | 0.8051     | -0.03               | 0.4084  | 0.7496              | 0.21   | 0.1234              | 0.2417     |
| 3707 Putative zinc finger and SCAN domain-containing protein 5C                           | A6NGD5  | 0.6845              | 0.7404     | -0.01               | 0.2970  | 0.6718              | 0.03   | 0.1388              | 0.0593     |
| 3708 PWWP domain-containing DNA repair factor 3B                                          | SH9PM0  | 0.0162              | 0.0742     | 0.28                | 0.0332  | 0.5275              | 0.19   | 0.3034              | 0.4861     |
| 3709 PX domain-containing protein kinase-like protein                                     | Q7Z7A4  | 0.5694              | 0.6372     | 0.10                | 0.4773  | 0.8038              | 0.12   | 0.3737              | 0.5720     |
| 3710 Pygopus homolog 2                                                                    | Q9BRQ0  | 0.0044              | 0.0417     | -0.47               | 0.0278  | 0.5071              | -0.29  | 0.0175              | 0.0631     |
| 3711 Pyridine nucleotide-disulfide oxidoreductase domain-containing protein 1             | Q8WU10  | 0.4108              | 0.5230     | -3.31               | 0.5752  | 0.7323              | -1.75  | 0.5661              | 0.6642     |
| 3712 Pyridoxal kinase                                                                     | O00764  | 0.1593              | 0.3142     | -0.07               | 0.2548  | 0.6629              | 0.08   | 0.5035              | 0.7255     |
| 3713 Pyridoxal phosphate homeostasis protein                                              | O94903  | 0.0140              | 0.0691     | -0.51               | 0.7374  | 0.8093              | 0.05   | 0.3127              | 0.4984     |
| 3714 Pyridoxal-dependent decarboxylase domain-containing protein 1                        | Q6P996  | 0.0236              | 0.0923     | 0.12                | 0.1722  | 0.6612              | 0.07   | 0.0254              | 0.0792     |
| 3715 Pyridoxase-5'-phosphate oxidase                                                      | Q9NV59  | 0.2444              | 0.4300     | -0.02               | 0.0622  | 0.5901              | -0.10  | 0.0858              | 0.1825     |
| 3716 Pyru domain-containing protein 5                                                     | W6CW81  | 0.2981              | 0.4968     | 0.07                | 0.2415  | 0.6598              | 0.08   | 0.0898              | 0.1879     |
| 3717 Pyroglutamate-peptidase 1                                                            | Q9NXJ5  | 0.4061              | 0.6264     | -0.08               | 0.1433  | 0.6489              | -0.57  | 0.6536              | 0.7049     |
| 3718 Pyruvate-5-carboxylate reductase 1 mitochondrial                                     | P32322  | 0.1612              | 0.3167     | 0.08                | 0.7521  | 0.8204              | 0.06   | 0.0889              | 0.1872     |
| 3719 Pyruvate-5-carboxylate reductase 2                                                   | Q9C636  | 0.1186              | 0.2555     | 0.22                | 0.5924  | 0.6969              | -0.06  | 0.7274              | 0.7713     |
| 3720 Pyruvate-5-carboxylate reductase 3                                                   | Q53H96  | 0.6445              | 0.7061     | -0.01               | 0.7486  | 0.7177              | 0.02   | 0.0308              | 0.0896     |
| 3721 Pyruvate carboxylase mitochondrial                                                   | P11498  | 0.0003              | 0.0145     | 0.15                | 0.4536  | 0.7872              | 0.09   | 0.0258              | 0.0799     |
| 3722 Pyruvate dehydrogenase E1 component subunit alpha_testis-specific form_mitochondrial | P29803  | 0.4108              | 0.5228     | -3.31               | 0.5752  | 0.7321              | -1.75  | 0.5661              | 0.6640     |
| 3723 Pyruvate dehydrogenase E1 component subunit alpha_somatic form_mitochondrial         | P08559  | 0.4823              | 0.5569     | 0.03                | 0.8689  | 0.9049              | 0.01   | 0.0197              | 0.0676     |
| 3724 Pyruvate dehydrogenase E1 component subunit beta_mitochondrial                       | P11177  | 0.0358              | 0.1183     | 0.15                | 0.0692  | 0.6004              | 0.08   | 0.0038              | 0.0320     |
| 3725 Pyruvate dehydrogenase phosphatase regulatory subunit_mitochondrial                  | Q8NCN5  | 0.4108              | 0.5227     | -3.31               | 0.5752  | 0.7319              | -1.75  | 0.5661              | 0.6639     |
| 3726 Pyruvate dehydrogenase protein X component_mitochondrial                             | O00330  | 0.4108              | 0.5226     | -3.31               | 0.5752  | 0.7317              | -1.75  | 0.5661              | 0.6637     |
| 3727 Pyruvate kinase PKLR                                                                 | P30613  | 0.0083              | 0.0539     | -0.22               | 0.0770  | 0.6127              | -0.18  | 0.0011              | 0.0224     |
| 3728 Pyruvate kinase PKM                                                                  | P14618  | 0.0006              | 0.0192     | 0.35                | 0.0631  | 0.5900              | 0.36   | 0.0002              | 0.0216     |
| 3729 Queuine tRNA-rNOSyltransferase accessory subunit 2                                   | Q9H974  | 0.0048              | 0.0432     | 0.23                | 0.0205  | 0.4741              | 0.24   | 0.0005              | 0.0218     |
| 3730 Quercetin salvage protein                                                            | Q748V5  | 0.7438              | 0.7916     | -0.06               | 0.2986  | 0.6725              | -0.44  | 0.7325              | 0.7756     |
| 3731 Quinone oxidoreductase                                                               | Q08257  | 0.0196              | 0.0820     | 0.24                | 0.5394  | 0.8550              | 0.15   | 0.0217              | 0.0715     |
| 3732 Rab effector MyRIP                                                                   | Q8NF9W  | 0.0172              | 0.0767     | -0.76               | 0.5317  | 0.8506              | -0.34  | 0.0935              | 0.1939     |
| 3733 Rab effector Nac2                                                                    | Q9UNE2  | 0.4108              | 0.5225     | -3.31               | 0.5752  | 0.7315              | -1.75  | 0.5661              | 0.6636     |
| 3734 Rab GDP dissociation inhibitor alpha                                                 | P31150  | 0.0020              | 0.0308     | 0.24                | 0.1678  | 0.6610              | 0.23   | 0.0086              | 0.0439     |
| 3735 Rab GDP dissociation inhibitor beta                                                  | P50395  | 0.0015              | 0.0260     | 0.18                | 0.0606  | 0.6782              | 0.16   | 0.0038              | 0.0316     |
| 3736 Rab GTPase-activating protein 1                                                      | Q9Y3P9  | 0.3053              | 0.5061     | 0.10                | 0.4850  | 0.8094              | -0.09  | 0.5490              | 0.7721     |
| 3737 Rab GTPase-activating protein 1-like isoform 10                                      | B7ZAP0  | 0.0168              | 0.0758     | 0.27                | 0.0644  | 0.5904              | 0.21   | 0.0343              | 0.0962     |
| 3738 Rab GTP-binding effector protein 1                                                   | Q15276  | 0.0318              | 0.1107     | 0.64                | 0.3954  | 0.7391              | 0.13   | 0.2221              | 0.3793     |
| 3739 Rab11 family-interacting protein 2                                                   | Q7LR04  | 0.0013              | 0.0244     | 0.31                | 0.0278  | 0.5088              | 0.15   | 0.0021              | 0.0260     |
| 3740 Rab3 GTPase-activating protein catalytic subunit                                     | Q15042  | 0.0069              | 0.0494     | 0.07                | 0.1994  | 0.6642              | 0.19   | 0.0002              | 0.0176     |
| 3741 Rab3 GTPase-activating protein non-catalytic subunit                                 | Q9H2M9  | 0.0257              | 0.0970     | 0.28                | 0.2251  | 0.6603              | -0.27  | 0.3971              | 0.6601     |
| 3742 Rab9 effector protein with kelch motifs                                              | Q7Z6M1  | 0.0932              | 0.2149     | 0.43                | 0.6810  | 0.7669              | 0.07   | 0.5802              | 0.6376     |
| 3743 Rabunyk-5                                                                            | Q9P2R3  | 0.4108              | 0.5223     | -3.31               | 0.5752  | 0.7314              | -1.75  | 0.5661              | 0.6634     |
| 3744 Rab-interacting lysosomal protein                                                    | Q96N2A  | 0.9836              | 0.9884     | 0.00                | 0.1080  | 0.6307              | 0.35   | 0.1368              | 0.2604     |
| 3745 Rab-like protein 3                                                                   | Q5YH78  | 0.9222              | 0.9405     | -0.01               | 0.0631  | 0.5879              | 0.17   | 0.0054              | 0.0360     |
| 3746 Rab-like protein 6                                                                   | Q3Y1C7  | 0.0012              | 0.0239     | -0.31               | 0.3361  | 0.6953              | 0.05   | 0.1264              | 0.2460     |
| 3747 RAC-alpha serine/threonine-protein kinase                                            | P31749  | 0.0006              | 0.0191     | -0.32               | 0.1892  | 0.6699              | 0.13   | 0.2660              | 0.4371     |
| 3748 RAC-beta serine/threonine-protein kinase                                             | P31751  | 0.7604              | 0.8052     | 0.14                | 0.4499  | 0.7841              | -0.58  | 0.1504              | 0.2799     |
| 3749 RAC-gamma serine/threonine-protein kinase                                            | Q9Y243  | 0.0055              | 0.0447     | -0.66               | 0.0308  | 0.5081              | -0.74  | 0.0230              | 0.0746     |
| 3750 RAD51-associated protein 2                                                           | Q09MP3  | 0.0481              | 0.1410     | 0.08                | 0.7355  | 0.8077              | 0.06   | 0.0909              | 0.1899     |
| 3751 Radial spoke head 1 homolog                                                          | Q8WYR4  | 0.8335              | 0.8670     | -0.02               | 0.5136  | 0.8361              | -0.04  | 0.2138              | 0.3684     |
| 3752 Radial spoke head protein 3 homolog                                                  | Q86UC2  | 0.3301              | 0.5364     | -0.12               | 0.8610  | 0.8999              | -0.02  | 0.5818              | 0.6385     |
| 3753 Radixin                                                                              | P35241  | 0.0010              | 0.0216     | -0.21               | 0.6106  | 0.7124              | 0.08   | 0.4278              | 0.6373     |
| 3754 RAF proto-oncogene serine/threonine-protein kinase                                   | P04049  | 0.1126              | 0.2442     | -0.10               | 0.2398  | 0.6614              | 0.20   | 0.6479              | 0.7004     |
| 3755 Rafin1                                                                               | Q14699  | 0.4108              | 0.5222     | -3.31               | 0.5752  | 0.7312              | -1.75  | 0.5661              | 0.6633     |
| 3756 Regulator complex protein LAMTOR1                                                    | Q6IAA8  | 0.3086              | 0.5094     | -0.04               | 0.6370  | 0.7328              | 0.02   | 0.0660              | 0.1505     |
| 3757 Regulator complex protein LAMTOR5                                                    | Q43504  | 0.0152              | 0.0714     | -0.43               | 0.0055  | 0.3850              | -0.56  | 0.0002              | 0.0268     |
| 3758 Ras GTPase-activating protein subunit alpha-2                                        | Q2PPJ7  | 0.0065              | 0.0482     | -0.33               | 0.4866  | 0.8102              | -0.16  | 0.2293              | 0.3887     |
| 3759 Ras GTPase-activating protein 1                                                      | P46060  | 0.0175              | 0.0773     | 0.09                | 0.3473  | 0.7038              | 0.14   | 0.0174              | 0.0629     |
| 3760 Ras-binding protein 3                                                                | Q9H6Z4  | 0.2367              | 0.4203     | -0.15               | 0.5374  | 0.8531              | -0.08  | 0.1161              | 0.2300     |
| 3761 Ras-specific GTPase-activating protein                                               | P43487  | 0.0309              | 0.1085     | 0.18                | 0.1163  | 0.6368              | 0.29   | 0.0044              | 0.0205     |
| 3762 Rap guanine nucleotide exchange factor 2                                             | Q9Y4G8  | 0.0486              | 0.1414     | 0.15                | 0.2725  | 0.6655              | 0.17   | 0.0446              | 0.1156     |
| 3763 Rap guanine nucleotide exchange factor 5                                             | Q92565  | 0.1442              | 0.2912     | -0.10               | 0.1268  | 0.6427              | -0.19  | 0.0112              | 0.0492     |
| 3764 Rap guanine nucleotide exchange factor 6                                             | Q8TEU7  | 0.4108              | 0.5221     | -3.31               | 0.5752  | 0.7310              | -1.75  | 0.5661              | 0.6631     |
| 3765 Rap1 GTPase-GDP dissociation stimulator 1                                            | P52306  | 0.0402              | 0.1263     | 0.16                | 0.5862  | 0.6920              | 0.03   | 0.0661              | 0.0377     |
| 3766 Ras and EF-hand domain-containing protein                                            | Q8IZ41  | 0.4108              | 0.5219     | -3.31               | 0.5752  | 0.7308              | -1.75  | 0.5661              | 0.6630     |
| 3767 Ras and Rab interactor-like protein                                                  | Q6ZS11  | 0.4108              | 0.5218     | -3.31               | 0.5752  | 0.7306              | -1.75  | 0.5661              | 0.6628     |
| 3768 Ras association domain-containing protein 2                                          | P50749  | 0.1682              | 0.3268     | -0.15               | 0.4687  | 0.7986              | 0.06   | 0.0390              | 0.1046     |
| 3769 Ras association domain-containing protein 8                                          | Q8NHQ8  | 0.2667              | 0.4584     | 0.11                | 0.1699  | 0.6334              | 0.30   | 0.0609              | 0.0398     |
| 3770 Ras GTPase-activating protein 1                                                      | P20936  | 0.4108              | 0.5217     | -3.31               | 0.5752  | 0.7305              | -1.75  | 0.5661              | 0.6627     |
| 3771 Ras GTPase-activating protein 3                                                      | Q14644  | 0.0010              | 0.0215     | 0.15                | 0.2971  | 0.6717              | 0.19   | 0.0049              | 0.0342     |
| 3772 Ras GTPase-activating protein-binding protein 1                                      | Q13283  | 0.7765              | 0.8180     | 0.02                | 0.6769  | 0.7632              | -0.05  | 0.1412              | 0.2667     |
| 3773 Ras GTPase-activating protein-binding protein 2                                      | Q9UN86  | 0.0297              | 0.1055     | -0.41               | 0.2733  | 0.6650              | -0.18  | 0.0093              | 0.0450     |
| 3774 Ras GTPase-activating-like protein IQGAP1                                            | P46940  | 0.0558              | 0.1544     | 0.09                | 0.2158  | 0.6611              | 0.21   | 0.0224              | 0.0733     |
| 3775 Ras GTPase-activating-like protein IQGAP2                                            | Q13576  | 0.0014              | 0.0251     | 0.33                | 0.5404  | 0.8555              | 0.08   | 0.0400              | 0.1319     |
| 3776 Ras GTPase-activating-like protein IQGAP3                                            | Q86V13  | 0.4108              | 0.5216     | -3.31               | 0.5752  | 0.7303              | -1.75  | 0.5661              | 0.6625     |
| 3777 Ras suppressor protein 1                                                             | Q15404  | 0.4108              | 0.5214     | -3.31               | 0.5752  | 0.7301              | -1.75  | 0.5661              | 0.6626     |
| 3778 Ras/Rap GTPase-activating protein SvnGAP                                             | Q96PV0  | 0.0041              | 0.0240     | 0.15                | 0.0036  | 0.3161              | 0.17   | 0.0017              | 0.0240     |

Supplementary Table S2. Overview on all relatively quantified 5180 proteins statistical analysis

| Protein name |                                            | MCF-7               |            |        |                     |            |        | MDA-MB-231          |            |        |                     |            |        |       |        |        |       |        |        |       |        |        |       |        |        |       |        |        |       |
|--------------|--------------------------------------------|---------------------|------------|--------|---------------------|------------|--------|---------------------|------------|--------|---------------------|------------|--------|-------|--------|--------|-------|--------|--------|-------|--------|--------|-------|--------|--------|-------|--------|--------|-------|
|              |                                            | Dai SC20 vs control |            |        | Gen SC20 vs control |            |        | Dai IC20 vs control |            |        | Gen IC20 vs control |            |        |       |        |        |       |        |        |       |        |        |       |        |        |       |        |        |       |
|              |                                            | p value             | BH q value | log2FC | p value             | BH q value | log2FC | p value             | BH q value | log2FC | p value             | BH q value | log2FC |       |        |        |       |        |        |       |        |        |       |        |        |       |        |        |       |
| 3779         | Ras-GEF domain-containing family member 1B | QOVMAM2             | 0.0386     | 0.1234 | 0.10                | 0.1011     | 0.6325 | 0.25                | 0.0721     | 0.1604 | 0.15                | 0.0003     | 0.0102 | 0.47  | 0.0003 | 0.0169 | 0.30  | 0.0027 | 0.0564 | 0.49  | 0.3736 | 0.6410 | -2.55 | 0.8708 | 1.2840 | -0.33 | 0.0651 | 0.2187 | 2.06  |
| 3780         | Ras-GEF domain-containing family member 1C | QKN431              | 0.3891     | 0.6058 | 0.18                | 0.7448     | 0.8150 | -0.07               | 0.03161    | 0.5030 | -0.22               | 0.09811    | 0.9836 | 0.00  | 0.7534 | 0.8072 | -0.00 | 0.7286 | 0.9682 | -0.07 | 0.3736 | 0.4477 | -2.55 | 0.8708 | 0.9289 | -0.33 | 0.0651 | 0.1169 | 2.06  |
| 3781         | Ras-related C3 botulinum toxin substrate 1 | P63000              | 0.0258     | 0.0971 | 0.24                | 0.661      | 0.7974 | 0.14                | 0.0493     | 0.1237 | 0.19                | 0.0128     | 0.0459 | 0.30  | 0.9374 | 0.9519 | 0.00  | 0.0185 | 0.0878 | 0.32  | 0.5449 | 0.5960 | 0.08  | 0.0284 | 0.1523 | -0.35 | 0.042  | 0.0442 | -0.46 |
| 3782         | Ras-related GTP-binding protein B          | Q5VJZM2             | 0.4108     | 0.5213 | -3.31               | 0.5752     | 0.7299 | -1.75               | 0.5661     | 0.6622 | -1.19               | 0.5388     | 0.6265 | 0.89  | 0.2938 | 0.4210 | -1.88 | 0.9510 | 0.1028 | 0.09  | 0.0189 | 0.1275 | -1.31 | 0.2234 | 0.5325 | 0.09  | 0.0032 | 0.0562 | -0.49 |
| 3783         | Ras-related protein Rab-10                 | P61026              | 0.0058     | 0.0457 | -0.18               | 0.0858     | 0.6207 | -0.12               | 0.0048     | 0.0338 | -0.22               | 0.0015     | 0.0175 | -0.30 | 0.0077 | 0.0639 | -0.19 | 0.2291 | 0.4123 | -0.12 | 0.1247 | 0.2973 | 0.11  | 0.0944 | 0.3066 | 0.11  | 0.0603 | 0.6664 | -0.03 |
| 3784         | Ras-related protein Rab-11B                | Q15907              | 0.3947     | 0.6129 | 0.04                | 0.3937     | 0.7373 | 0.17                | 0.1535     | 0.2849 | 0.09                | 0.0264     | 0.0732 | 0.15  | 0.2867 | 0.5164 | -0.05 | 0.0891 | 0.2178 | 0.09  | 0.0851 | 0.2331 | 0.36  | 0.8397 | 1.2831 | 0.02  | 0.8344 | 0.8660 | 0.01  |
| 3785         | Ras-related protein Rab-12                 | Q6Q022              | 0.0234     | 0.0890 | 0.16                | 0.2753     | 0.6645 | 0.15                | 0.1759     | 0.3184 | 0.09                | 0.0148     | 0.0498 | 0.19  | 0.2378 | 0.4249 | 0.04  | 0.0148 | 0.0519 | 0.15  | 0.1730 | 0.3694 | 0.05  | 0.0729 | 0.9322 | 0.07  | 0.0669 | 0.2353 | 0.32  |
| 3786         | Ras-related protein Rab-13                 | P51153              | 0.0002     | 0.0128 | 0.53                | 0.2465     | 0.6595 | 0.20                | 0.0434     | 0.1033 | 0.13                | 0.0013     | 0.0162 | 0.25  | 0.0002 | 0.0148 | 0.35  | 0.1514 | 0.3009 | 0.17  | 0.1271 | 0.3004 | 0.13  | 0.0061 | 0.0627 | 0.47  | 0.0442 | 0.1840 | 0.02  |
| 3787         | Ras-related protein Rab-14                 | P61106              | 0.8956     | 0.9181 | 0.01                | 0.8250     | 0.8745 | 0.02                | 0.0383     | 0.1033 | 0.15                | 0.0415     | 0.1011 | 0.14  | 0.6644 | 0.7295 | -0.02 | 0.0137 | 0.0776 | 0.21  | 0.0636 | 0.1988 | 0.26  | 0.2315 | 0.5453 | 0.10  | 0.8509 | 0.8797 | -0.41 |
| 3788         | Ras-related protein Rab-15                 | P59190              | 0.4635     | 0.5403 | 0.23                | 0.7605     | 0.8267 | -0.07               | 0.1097     | 0.2199 | -0.15               | 0.0998     | 0.1939 | 0.33  | 0.3806 | 0.4777 | 0.07  | 0.0170 | 0.0854 | 0.41  | 0.3059 | 0.5953 | 0.07  | 0.0252 | 0.1720 | -0.23 | 0.0418 | 0.0941 | -0.43 |
| 3789         | Ras-related protein Rab-17                 | Q9H077              | 0.1816     | 0.3451 | 0.17                | 0.5362     | 0.8517 | 0.07                | 0.0714     | 0.1594 | -0.30               | 0.2695     | 0.4254 | -0.14 | 0.7448 | 0.8001 | 0.03  | 0.4136 | 0.6311 | -0.09 | 0.3736 | 0.4680 | -2.55 | 0.8708 | 0.9745 | -0.33 | 0.0651 | 0.1269 | 2.06  |
| 3790         | Ras-related protein Rab-18                 | Q9NP72              | 0.6465     | 0.7080 | 0.02                | 0.9413     | 0.9610 | -0.01               | 0.5514     | 0.7747 | 0.03                | 0.1797     | 0.3046 | 0.07  | 0.8428 | 0.8789 | -0.01 | 0.0342 | 0.1193 | -0.18 | 0.5173 | 0.5707 | 0.05  | 0.7461 | 1.1881 | -0.02 | 0.0628 | 0.2239 | -0.15 |
| 3791         | Ras-related protein Rab-1A                 | P62820              | 0.0617     | 0.1645 | 0.14                | 0.2362     | 0.6635 | 0.21                | 0.0209     | 0.0700 | 0.20                | 0.0197     | 0.0598 | 0.21  | 0.2013 | 0.4020 | 0.07  | 0.0113 | 0.0729 | 0.29  | 0.0161 | 0.1185 | 0.56  | 0.5757 | 1.0061 | -0.10 | 0.5443 | 0.2175 | 0.19  |
| 3792         | Ras-related protein Rab-1B                 | Q9H0U4              | 0.1685     | 0.3267 | -0.03               | 0.0715     | 0.6042 | 0.29                | 0.0228     | 0.0744 | 0.15                | 0.0509     | 0.1164 | 0.11  | 0.7497 | 0.8044 | 0.01  | 0.1049 | 0.2413 | 0.14  | 0.0364 | 0.1586 | 0.37  | 0.2764 | 0.6124 | 0.11  | 0.1642 | 0.7007 | -0.02 |
| 3793         | Ras-related protein Rab-20                 | Q9NX57              | 0.1358     | 0.2799 | -0.14               | 0.1580     | 0.6611 | 0.13                | 0.0350     | 0.0972 | 0.28                | 0.2301     | 0.3732 | 0.11  | 0.5215 | 0.6088 | -0.07 | 0.2178 | 0.3992 | -0.14 | 0.3736 | 0.4985 | -2.55 | 0.8708 | 1.0308 | -0.33 | 0.0651 | 0.1402 | 2.06  |
| 3794         | Ras-related protein Rab-21                 | Q9UL25              | 0.0019     | 0.0300 | 0.15                | 0.2930     | 0.6701 | 0.15                | 0.0014     | 0.0222 | 0.18                | 0.0003     | 0.0112 | 0.23  | 0.0060 | 0.0569 | 0.08  | 0.0786 | 0.2007 | 0.18  | 0.4941 | 0.5479 | 0.06  | 0.0612 | 0.2362 | -0.09 | 0.2787 | 0.3506 | -0.02 |
| 3795         | Ras-related protein Rab-22A                | Q9UL26              | 0.1294     | 0.2705 | 0.03                | 0.7318     | 0.8045 | -0.02               | 0.0155     | 0.0585 | 0.13                | 0.8715     | 0.8895 | -0.01 | 0.0381 | 0.1421 | 0.21  | 0.1861 | 0.3581 | 0.12  | 0.8823 | 0.9022 | 0.03  | 0.5390 | 0.9641 | -0.15 | 0.3219 | 0.3931 | -0.24 |
| 3796         | Ras-related protein Rab-24                 | Q969Q5              | 0.3139     | 0.5155 | 0.17                | 0.2591     | 0.6638 | 0.19                | 0.7614     | 0.8021 | -0.04               | 0.2613     | 0.4142 | 0.19  | 0.4323 | 0.5263 | 0.12  | 0.3645 | 0.5715 | 0.15  | 0.3736 | 0.4725 | -2.55 | 0.8708 | 0.9827 | -0.33 | 0.0651 | 0.1288 | 2.06  |
| 3797         | Ras-related protein Rab-25                 | P57735              | 0.5896     | 0.6562 | 0.02                | 0.4012     | 0.7449 | 0.35                | 0.0295     | 0.0871 | 0.24                | 0.0082     | 0.0366 | 0.31  | 0.0526 | 0.1701 | -0.06 | 0.0170 | 0.0857 | 0.18  | 0.1670 | 0.3616 | 0.28  | 0.7248 | 1.1700 | -0.05 | 0.1370 | 0.1980 | -0.31 |
| 3798         | Ras-related protein Rab-2A                 | P61019              | 0.0190     | 0.0810 | 0.22                | 0.2212     | 0.6589 | 0.11                | 0.0312     | 0.0903 | 0.20                | 0.1177     | 0.2196 | 0.08  | 0.1684 | 0.3550 | 0.07  | 0.0083 | 0.0668 | 0.26  | 0.3538 | 0.5165 | 0.21  | 0.1141 | 0.3460 | 0.13  | 0.0445 | 0.1843 | 0.21  |
| 3799         | Ras-related protein Rab-2B                 | Q8RWD1              | 0.9842     | 0.9884 | 0.00                | 0.3445     | 0.7020 | -0.12               | 0.3259     | 0.7468 | 0.04                | 0.4798     | 0.6802 | 0.05  | 0.4642 | 0.5557 | -0.06 | 0.1598 | 0.3206 | -0.11 | 0.6089 | 0.6564 | -0.09 | 0.0456 | 0.9220 | 0.04  | 0.0090 | 0.0846 | 0.23  |
| 3800         | Ras-related protein Rab-30                 | Q15771              | 0.0021     | 0.0315 | 0.30                | 0.0920     | 0.2252 | 0.21                | 0.1272     | 0.2472 | 0.12                | 0.0239     | 0.0785 | 0.22  | 0.0025 | 0.0387 | 0.19  | 0.0217 | 0.0950 | 0.21  | 0.6627 | 0.7071 | -0.10 | 0.5699 | 0.9920 | 0.11  | 0.2399 | 0.3901 | 0.25  |
| 3801         | Ras-related protein Rab-32                 | Q13637              | 0.6633     | 0.7232 | 0.09                | 0.8680     | 0.9041 | 0.03                | 0.7601     | 0.8011 | 0.07                | 0.9082     | 0.9206 | -0.03 | 0.6299 | 0.7003 | 0.12  | 0.3641 | 0.5714 | 0.21  | 0.0213 | 0.1337 | 0.13  | 0.3099 | 0.6582 | 0.07  | 0.2899 | 0.3618 | 0.05  |
| 3802         | Ras-related protein Rab-33B                | Q9H082              | 0.0170     | 0.0761 | -0.13               | 0.4252     | 0.5689 | -0.17               | 0.0038     | 0.0322 | -0.15               | 0.0046     | 0.0276 | -0.31 | 0.0011 | 0.0261 | -0.28 | 0.0066 | 0.0631 | -0.21 | 0.0239 | 0.1374 | 0.36  | 0.0303 | 0.0246 | 0.75  | 0.9535 | 0.6545 | 0.03  |
| 3803         | Ras-related protein Rab-34                 | Q9BZG1              | 0.4108     | 0.5212 | -3.31               | 0.5752     | 0.7297 | -1.75               | 0.5661     | 0.6621 | -1.19               | 0.5388     | 0.6263 | 0.89  | 0.2938 | 0.4208 | -1.88 | 0.9510 | 0.1028 | 0.09  | 0.0189 | 0.1275 | -1.31 | 0.2234 | 0.5325 | 0.09  | 0.0032 | 0.0562 | -0.49 |
| 3804         | Ras-related protein Rab-35                 | Q15286              | 0.7176     | 0.7691 | -0.01               | 0.9620     | 0.9742 | 0.01                | 0.3215     | 0.5090 | -0.06               | 0.0115     | 0.0429 | -0.26 | 0.0056 | 0.0355 | -0.36 | 0.1656 | 0.3290 | -0.43 | 0.6951 | 0.7362 | -0.03 | 0.0406 | 0.1848 | -0.07 | 0.0128 | 0.0985 | -0.15 |
| 3805         | Ras-related protein Rab-37                 | Q96AX2              | 0.0036     | 0.0384 | -0.50               | 0.0527     | 0.5821 | 0.22                | 0.0119     | 0.0511 | -0.35               | 0.0243     | 0.0693 | -0.29 | 0.1467 | 0.3220 | 0.09  | 0.2628 | 0.4553 | -0.09 | 0.0418 | 0.1119 | -0.41 | 0.0047 | 0.0548 | -0.58 | 0.0113 | 0.0931 | -0.51 |
| 3806         | Ras-related protein Rab-38                 | P57729              | 0.2102     | 0.3829 | -0.11               | 0.2870     | 0.6679 | 0.06                | 0.3837     | 0.5844 | -0.09               | 0.0035     | 0.0237 | -0.28 | 0.0212 | 0.1049 | 0.20  | 0.0099 | 0.0706 | -0.29 | 0.3736 | 0.6142 | -2.55 | 0.8708 | 1.2375 | -0.33 | 0.0651 | 0.2014 | 2.06  |
| 3807         | Ras-related protein Rab-39A                | Q14964              | 0.0208     | 0.0852 | 0.18                | 0.4054     | 0.7484 | 0.06                | 0.4286     | 0.6380 | 0.03                | 0.1140     | 0.2145 | 0.08  | 0.1804 | 0.3724 | 0.06  | 0.0213 | 0.0941 | -0.29 | 0.0993 | 0.2545 | -0.25 | 0.7330 | 1.1759 | -0.03 | 0.7082 | 0.7584 | -0.04 |
| 3808         | Ras-related protein Rab-39B                | Q96DA2              | 0.4108     | 0.5210 | -3.31               | 0.5752     | 0.7296 | -1.75               | 0.5661     | 0.6619 | -1.19               | 0.5388     | 0.6262 | 0.89  | 0.2938 | 0.4208 | -1.88 | 0.9510 | 0.1024 | 0.09  | 0.0409 | 0.1662 | 0.42  | 0.6696 | 1.1074 | 0.06  | 0.0147 | 0.1046 | 0.69  |
| 3809         | Ras-related protein Rab-3A                 | P20336              | 0.5707     | 0.6385 | -0.02               | 0.7633     | 0.8289 | 0.02                | 0.0118     | 0.0507 | 0.32                | 0.0442     | 0.1055 | 0.24  | 0.0063 | 0.0580 | 0.25  | 0.0278 | 0.1068 | 0.09  | 0.0507 | 0.0807 | 0.57  | 0.0013 | 0.0302 | 0.51  | 0.0317 | 0.1512 | 0.57  |
| 3810         | Ras-related protein Rab-3B                 | P20337              | 0.5488     | 0.6181 |                     |            |        |                     |            |        |                     |            |        |       |        |        |       |        |        |       |        |        |       |        |        |       |        |        |       |

Supplementary Table S2. Overview on all relatively quantified 5180 proteins statistical analysis

|      | Protein name                                                                       | UniProt | MCF-7               |                     |                     |                     | MDA-MB-231          |                     |                     |                     |
|------|------------------------------------------------------------------------------------|---------|---------------------|---------------------|---------------------|---------------------|---------------------|---------------------|---------------------|---------------------|
|      |                                                                                    |         | Dai SC20 vs control | Gen SC20 vs control | SSE SC20 vs control | Dai IC20 vs control | Gen IC20 vs control | SSE IC20 vs control | Dai IC20 vs control | Gen IC20 vs control |
|      |                                                                                    |         | p value             | BH q value          | log2FC              | p value             | BH q value          | log2FC              | p value             | BH q value          |
| 3859 | Regulator of G-protein signaling 2                                                 | P41220  | 0.0203              | 0.0842              | 0.09                | 0.5444              | 0.8590              | 0.05                | 0.2069              | 0.3601              |
| 3860 | Regulator of G-protein signaling 21                                                | Q2M5E4  | 0.0407              | 0.1273              | 0.62                | 0.0665              | 0.6505              | -0.50               | 0.0198              | 0.0679              |
| 3861 | Regulator of G-protein signaling 4                                                 | P49798  | 0.4108              | 0.5198              | -3.31               | 0.5752              | 0.7278              | -1.75               | 0.5661              | 0.6605              |
| 3862 | Regulator of G-protein signaling 7                                                 | P49802  | 0.1852              | 0.3497              | 0.09                | 0.6449              | 0.7359              | 0.03                | 0.4265              | 0.6363              |
| 3863 | Regulator of microtubule dynamics protein 1                                        | Q96D85  | 0.5084              | 0.5915              | -0.12               | 0.2092              | 0.6612              | -0.25               | 0.1075              | 0.2163              |
| 3864 | Regulator of noncense transcripts 1                                                | Q29200  | 0.1668              | 0.3247              | -0.05               | 0.6019              | 0.7056              | 0.03                | 0.0553              | 0.1343              |
| 3865 | Regulator of noncense transcripts 2                                                | Q9HAU5  | 0.0256              | 0.0969              | 0.25                | 0.2277              | 0.6600              | 0.16                | 0.2884              | 0.4674              |
| 3866 | RelA-associated inhibitor                                                          | Q8WUF5  | 0.0048              | 0.0431              | -0.20               | 0.2181              | 0.6611              | 0.21                | 0.7805              | 0.8197              |
| 3867 | Remodeling and spacing factor 1                                                    | Q96723  | 0.1829              | 0.3472              | 0.07                | 0.0844              | 0.6219              | 0.30                | 0.0016              | 0.0237              |
| 3868 | Renin receptor                                                                     | Q75787  | 0.0077              | 0.0519              | 0.30                | 0.5793              | 0.6876              | -0.08               | 0.6745              | 0.7247              |
| 3869 | Replication factor C subunit 2                                                     | P35250  | 0.1093              | 0.2393              | 0.07                | 0.1741              | 0.6607              | 0.18                | 0.0125              | 0.0525              |
| 3870 | Replication factor C subunit 3                                                     | P40938  | 0.8663              | 0.8944              | 0.02                | 0.5844              | 0.6915              | 0.05                | 0.1587              | 0.2927              |
| 3871 | Replication factor C subunit 4                                                     | P35249  | 0.6317              | 0.6939              | 0.05                | 0.6079              | 0.7102              | -0.06               | 0.1949              | 0.3437              |
| 3872 | Replication factor C subunit 5                                                     | P40937  | 0.8476              | 0.8785              | 0.01                | 0.5903              | 0.6956              | 0.02                | 0.0411              | 0.1087              |
| 3873 | Replication protein A 14 kDa subunit                                               | P35244  | 0.4108              | 0.5196              | -3.31               | 0.5752              | 0.7276              | -1.75               | 0.5661              | 0.6603              |
| 3874 | Replication protein A 30 kDa subunit                                               | Q13156  | 0.4108              | 0.5195              | -3.31               | 0.5752              | 0.7274              | -1.75               | 0.5661              | 0.6602              |
| 3875 | Replication protein A 32 kDa subunit                                               | P15927  | 0.5932              | 0.6593              | 0.31                | 0.6168              | 0.7549              | 0.49                | 0.1493              | 0.2783              |
| 3876 | Replication protein A 70 kDa DNA-binding subunit                                   | P27694  | 0.1200              | 0.2555              | 0.11                | 0.1382              | 0.6520              | 0.08                | 0.0294              | 0.0871              |
| 3877 | Replication stress response regulator SDE2                                         | Q6IO49  | 0.6669              | 0.7264              | -0.02               | 0.0040              | 0.3342              | 0.28                | 0.4274              | 0.6373              |
| 3878 | Required for meiotic nuclear division protein 1 homolog                            | Q9NWS8  | 0.0007              | 0.0199              | -0.39               | 0.1618              | 0.6620              | -0.15               | 0.1585              | 0.2924              |
| 3879 | Resistin                                                                           | Q9HDB9  | 0.2258              | 0.4044              | -0.31               | 0.3421              | 0.7001              | 0.28                | 0.8732              | 0.9998              |
| 3880 | REST corepressor 1                                                                 | Q9UKL0  | 0.1502              | 0.2996              | 0.09                | 0.1620              | 0.6613              | 0.20                | 0.0197              | 0.0677              |
| 3881 | Reticulocalbin-1                                                                   | Q15293  | 0.1204              | 0.2561              | 0.07                | 0.2896              | 0.6685              | 0.17                | 0.0032              | 0.0303              |
| 3882 | Reticulocalbin-2                                                                   | Q14257  | 0.3271              | 0.5330              | 0.02                | 0.1100              | 0.4284              | 0.08                | 0.0088              | 0.0440              |
| 3883 | Reticulocalbin-3                                                                   | Q96D15  | 0.5021              | 0.5755              | -0.11               | 0.3078              | 0.6779              | 0.17                | 0.9481              | 0.9592              |
| 3884 | Reticulon-1                                                                        | P16799  | 0.4108              | 0.5194              | -3.31               | 0.5752              | 0.7272              | -1.75               | 0.5661              | 0.6600              |
| 3885 | Reticulon-3                                                                        | Q95197  | 0.0051              | 0.0435              | 0.33                | 0.4211              | 0.7595              | 0.10                | 0.0459              | 0.1181              |
| 3886 | Reticulon-4                                                                        | Q9NOC3  | 0.0762              | 0.1881              | -0.12               | 0.0762              | 0.6167              | 0.24                | 0.4476              | 0.6609              |
| 3887 | Reticulon-4 receptor-like 2                                                        | Q86UN3  | 0.0000              | 0.0000              | 0.86                | 0.0598              | 0.6330              | 0.26                | 0.0617              | 0.1443              |
| 3888 | Retinol dehydrogenase 2                                                            | Q94788  | 0.4108              | 0.5193              | -3.31               | 0.5752              | 0.7271              | -1.75               | 0.5661              | 0.6600              |
| 3889 | Retinal rod rhodopsin-sensitive cGMP 3', 5'-cyclic phosphodiesterase subunit delta | Q43924  | 0.4108              | 0.5191              | -3.31               | 0.5752              | 0.7269              | -1.75               | 0.5661              | 0.6599              |
| 3890 | Retinoid dehydrogenase 1                                                           | P12271  | 0.1086              | 0.2380              | -0.95               | 0.8038              | 0.8783              | 0.03                | 0.0130              | 0.0533              |
| 3891 | Retinoblastoma-associated protein                                                  | P06400  | 0.4108              | 0.5190              | -3.31               | 0.5752              | 0.7267              | -1.75               | 0.5661              | 0.6597              |
| 3892 | Retinoic acid receptor alpha                                                       | P10276  | 0.0573              | 0.1572              | -0.18               | 0.0612              | 0.5937              | -0.21               | 0.3442              | 0.5380              |
| 3893 | Retinoic acid receptor RXR-alpha                                                   | P19793  | 0.4108              | 0.5189              | -3.31               | 0.5752              | 0.7265              | -1.75               | 0.5661              | 0.6596              |
| 3894 | Retinoic acid receptor RXR-gamma                                                   | P48443  | 0.4108              | 0.5188              | -3.31               | 0.5752              | 0.7264              | -1.75               | 0.5661              | 0.6594              |
| 3895 | Retinoic acid-induced protein 3                                                    | Q90002  | 0.0002              | 0.0123              | -0.72               | 0.0057              | 0.3835              | -0.44               | 0.0002              | 0.0059              |
| 3896 | Retinol dehydrogenase 11                                                           | Q8T1C2  | 0.8741              | 0.9009              | 0.01                | 0.5631              | 0.8788              | 0.07                | 0.1108              | 0.2218              |
| 3897 | Retinol-binding protein 1                                                          | P09455  | 0.4108              | 0.5186              | -3.31               | 0.5752              | 0.7262              | -1.75               | 0.5661              | 0.6593              |
| 3898 | Retinol-binding protein 2                                                          | P51020  | 0.4108              | 0.5185              | -3.31               | 0.5752              | 0.7260              | -1.75               | 0.5661              | 0.6591              |
| 3899 | Retinoid demethylase factor 1                                                      | Q9HMC1  | 0.1535              | 0.3051              | 0.12                | 0.1679              | 0.6599              | 0.80                | 0.0015              | 0.0228              |
| 3900 | RGM domain family member B                                                         | Q6NWC4  | 0.4108              | 0.5184              | -3.31               | 0.5752              | 0.7258              | -1.75               | 0.5661              | 0.6590              |
| 3901 | Rho GDP-dissociation inhibitor 1                                                   | P52565  | 0.0629              | 0.1659              | -0.11               | 0.4304              | 0.7664              | 0.13                | 0.2189              | 0.3755              |
| 3902 | Rho GTPase-activating protein 1                                                    | Q07960  | 0.0066              | 0.0488              | -0.13               | 0.2394              | 0.9475              | -0.01               | 0.0851              | 0.1811              |
| 3903 | Rho GTPase-activating protein 15                                                   | Q3Q0Z3  | 0.4108              | 0.5183              | -3.31               | 0.5752              | 0.7257              | -1.75               | 0.5661              | 0.6588              |
| 3904 | Rho GTPase-activating protein 17                                                   | Q68M7Q  | 0.0245              | 0.0944              | -0.15               | 0.0101              | 0.4434              | -0.20               | 0.0698              | 0.1570              |
| 3905 | Rho GTPase-activating protein 18                                                   | Q8N392  | 0.4108              | 0.5181              | -3.31               | 0.5752              | 0.7255              | -1.75               | 0.5661              | 0.6587              |
| 3906 | Rho GTPase-activating protein 20                                                   | Q9P2F6  | 0.0669              | 0.1714              | 0.42                | 0.0662              | 0.6855              | -0.36               | 0.8936              | 0.9153              |
| 3907 | Rho GTPase-activating protein 21                                                   | Q5T5U3  | 0.2783              | 0.4723              | 0.08                | 0.4889              | 0.8120              | 0.09                | 0.0955              | 0.1969              |
| 3908 | Rho GTPase-activating protein 26                                                   | Q9UNAI  | 0.1016              | 0.2275              | 0.11                | 0.5187              | 0.8396              | 0.06                | 0.0182              | 0.0646              |
| 3909 | Rho GTPase-activating protein 28                                                   | Q9P2N2  | 0.0034              | 0.0379              | -2.89               | 0.2251              | 0.6606              | -1.87               | 0.0014              | 0.0225              |
| 3910 | Rho GTPase-activating protein 29                                                   | Q52LW3  | 0.0109              | 0.0599              | -0.07               | 0.1838              | 0.6649              | -0.07               | 0.1525              | 0.2833              |
| 3911 | Rho GTPase-activating protein 35                                                   | Q9NRY4  | 0.0062              | 0.0474              | 0.27                | 0.3200              | 0.6830              | 0.13                | 0.0511              | 0.1272              |
| 3912 | Rho GTPase-activating protein 40                                                   | Q5T330  | 0.0256              | 0.0968              | 0.21                | 0.1077              | 0.6311              | 0.27                | 0.0380              | 0.1028              |
| 3913 | Rho GTPase-activating protein 44                                                   | Q17B89  | 0.0064              | 0.0478              | -0.88               | 0.0538              | 0.5855              | -0.51               | 0.0103              | 0.0474              |
| 3914 | Rho GTPase-activating protein 45                                                   | Q92619  | 0.2943              | 0.4924              | 0.08                | 0.2712              | 0.6642              | 0.14                | 0.7400              | 0.7828              |
| 3915 | Rho GTPase-activating protein 5                                                    | Q13017  | 0.4108              | 0.5180              | -3.31               | 0.5752              | 0.7253              | -1.75               | 0.5661              | 0.6585              |
| 3916 | Rho guanine nucleotide exchange factor 1                                           | Q92888  | 0.0008              | 0.0203              | 0.11                | 0.4557              | 0.7879              | 0.05                | 0.0687              | 0.1551              |
| 3917 | Rho guanine nucleotide exchange factor 11                                          | Q15085  | 0.9558              | 0.9668              | 0.00                | 0.5915              | 0.6960              | -0.04               | 0.2064              | 0.3595              |
| 3918 | Rho guanine nucleotide exchange factor 16                                          | Q5VV41  | 0.0555              | 0.1538              | -0.39               | 0.7857              | 0.8458              | -0.12               | 0.2880              | 0.4669              |
| 3919 | Rho guanine nucleotide exchange factor 17                                          | Q96PE2  | 0.3444              | 0.5528              | -0.14               | 0.2334              | 0.6621              | 0.20                | 0.6684              | 0.7189              |
| 3920 | Rho guanine nucleotide exchange factor 18                                          | Q6ZS25  | 0.1248              | 0.2630              | -0.78               | 0.8810              | 0.9144              | -0.07               | 0.0320              | 0.0917              |
| 3921 | Rho guanine nucleotide exchange factor 2                                           | Q92974  | 0.4108              | 0.5179              | -3.31               | 0.5752              | 0.7251              | -1.75               | 0.5661              | 0.6584              |
| 3922 | Rho guanine nucleotide exchange factor 28                                          | Q8N1W1  | 0.1000              | 0.2250              | 0.23                | 0.2232              | 0.6584              | 0.14                | 0.0814              | 0.1752              |
| 3923 | Rho guanine nucleotide exchange factor 4                                           | Q9NR80  | 0.4108              | 0.5177              | -3.31               | 0.5752              | 0.7249              | -1.75               | 0.5661              | 0.6582              |
| 3924 | Rho guanine nucleotide exchange factor 7                                           | Q14155  | 0.4108              | 0.5176              | -3.31               | 0.5752              | 0.7248              | -1.75               | 0.5661              | 0.6581              |
| 3925 | Rho guanine nucleotide exchange factor 9                                           | Q43307  | 0.5336              | 0.6043              | 0.05                | 0.1088              | 0.6586              | 0.12                | 0.4404              | 0.6520              |
| 3926 | Rho-associated protein kinase 1                                                    | Q13464  | 0.0031              | 0.0362              | -2.34               | 0.0467              | 0.5639              | -1.12               | 0.0029              | 0.0297              |
| 3927 | Rho-associated protein kinase 2                                                    | Q75116  | 0.0221              | 0.0885              | 0.28                | 0.0771              | 0.5822              | 0.23                | 0.3380              | 0.5304              |
| 3928 | Rhopiliin-2                                                                        | Q8B1C4  | 0.0108              | 0.0598              | 0.25                | 0.0224              | 0.4775              | 0.20                | 0.0287              | 0.0859              |
| 3929 | Rho-related GTP-binding protein RhoC                                               | P62745  | 0.0633              | 0.1665              | -0.63               | 0.0502              | 0.5740              | -0.08               | 0.0132              | 0.0538              |
| 3930 | Rho-related GTP-binding protein RhoG                                               | P08134  | 0.2015              | 0.3721              | 0.06                | 0.7013              | 0.7794              | 0.05                | 0.2019              | 0.3537              |
| 3931 | Rho-related GTP-binding protein RhoH                                               | P84095  | 0.0761              | 0.1882              | 0.06                | 0.5102              | 0.8321              | 0.09                | 0.1609              | 0.2959              |
| 3932 | Rho-related GTP-binding protein RhoI                                               | Q9H4E5  | 0.4108              | 0.5175              | -3.31               | 0.5752              | 0.7246              | -1.75               | 0.5661              | 0.6579              |
| 3933 | Rhotekin                                                                           | Q9B5T9  | 0.7068              | 0.7591              | 0.01                | 0.4737              | 0.8011              | -0.25               | 0.0009              | 0.0204              |
| 3934 | Ribonuclease inhibitor                                                             | P13489  | 0.0078              | 0.0522              | 0.26                | 0.4640              | 0.7818              | 0.08                | 0.0829              | 0.1774              |
| 3935 | Ribonuclease P protein subunit p20                                                 | Q75817  | 0.4728              | 0.5485              | -0.07               | 0.1985              | 0.6642              | -0.15               | 0.9426              | 0.9555              |
| 3936 | Ribonuclease P protein subunit p40                                                 | Q75818  | 0.0028              | 0.0354              | 0.29                | 0.1855              | 0.6668              | 0.19                | 0.0508              | 0.1268              |
| 3937 | Ribonuclease T2                                                                    | Q00584  | 0.3770              | 0.5925              | 0.11                | 0.8568              | 0.8968              | -0.03               | 0.0426              | 0.1119              |
| 3938 | Ribonuclease P/MPR protein subunit POP1                                            | Q95755  | 0.0412              | 0.1285              | -0.20               | 0.3791              | 0.7257              | 0.11                | 0.3026              | 0.4854              |
| 3939 | Ribonucleoprotein PTB-binding 1                                                    | Q8YI67  | 0.0034              | 0.0378              | 0.28                | 0.0995              | 0.6355              | 0.35                | 0.0018              | 0.0241              |
| 3940 | Ribonucleoside-diphosphate reductase large subunit                                 | P23921  | 0.1841              | 0.3487              | 0.04                | 0.0572              | 0.224               | 0.0303              | 0.0316              | 0.42                |
| 3941 | Ribonucleoside-diphosphate reductase subunit M2                                    | P31350  | 0.0017              | 0.0281              | 0.35                | 0.1479              | 0.6576              | 0.26                | 0.0244              | 0.0773              |

Supplementary Table S2. Overview on all relatively quantified 5180 proteins statistical analysis

| MCF-7                                                                |         |                     |            |        |                     |            |        |                     |            |        |                     | MDA-MB-231 |        |                     |            |        |                     |            |        |        |        |       |        |        |       |        |        |       |
|----------------------------------------------------------------------|---------|---------------------|------------|--------|---------------------|------------|--------|---------------------|------------|--------|---------------------|------------|--------|---------------------|------------|--------|---------------------|------------|--------|--------|--------|-------|--------|--------|-------|--------|--------|-------|
| Protein name                                                         | UniProt | Dai SC20 vs control |            |        | Gen SC20 vs control |            |        | SSE SC20 vs control |            |        | Dai IC20 vs control |            |        | Gen IC20 vs control |            |        | SSE IC20 vs control |            |        |        |        |       |        |        |       |        |        |       |
|                                                                      |         | p value             | BH q value | log2FC | p value             | BH q value | log2FC | p value             | BH q value | log2FC | p value             | BH q value | log2FC | p value             | BH q value | log2FC | p value             | BH q value | log2FC |        |        |       |        |        |       |        |        |       |
| 3942 Ribonucleoside-diphosphate reductase subunit M2 B               | Q7LG56  | 0.3693              | 0.5834     | 0.06   | 0.1594              | 0.6643     | 0.40   | 0.0658              | 0.1504     | 0.20   | 0.1449              | 0.2850     | 0.47   | 0.0000              | 0.0000     | 0.36   | 0.0501              | 0.1504     | 0.22   | 0.2989 | 0.5563 | -0.26 | 0.2205 | 0.5276 | 0.31  | 0.5250 | 0.5916 | 0.14  |
| 3943 Ribose-5-phosphate isomerase                                    | P49247  | 0.0944              | 0.2166     | -3.22  | 0.2051              | 0.6595     | -1.75  | 0.0233              | 0.0752     | -3.47  | 0.0039              | 0.0253     | -4.53  | 0.8887              | 0.9147     | -0.01  | 0.1016              | 0.2361     | -3.35  | 0.3736 | 0.5336 | -2.55 | 0.8708 | 1.0946 | -0.33 | 0.0651 | 0.1568 | 2.06  |
| 3944 Ribose-phosphate pyrophosphokinase 1                            | P60891  | 0.4491              | 0.5267     | -0.04  | 0.0422              | 0.5678     | -0.30  | 0.0057              | 0.0366     | -0.28  | 0.4260              | 0.6178     | -0.04  | 0.5145              | 0.6032     | 0.03   | 0.7710              | 1.0065     | 0.03   | 0.0555 | 0.0787 | -0.55 | 0.0304 | 0.0456 | -0.50 | 0.0468 | 0.0777 | -0.49 |
| 3945 Ribose-phosphate pyrophosphokinase 2                            | P11908  | 0.0293              | 0.1047     | 0.10   | 0.4133              | 0.7525     | 0.09   | 0.3391              | 0.5315     | 0.04   | 0.2885              | 0.4499     | 0.02   | 0.0102              | 0.0719     | -0.09  | 0.3502              | 0.5553     | 0.03   | 0.1019 | 0.2587 | -0.19 | 0.0024 | 0.0406 | 2.84  | 0.0006 | 0.0317 | 2.91  |
| 3946 Ribosomal biogenesis protein SBDS                               | P21108  | 0.4462              | 0.5236     | -0.04  | 0.3169              | 0.6806     | 0.12   | 0.0235              | 0.0753     | -0.25  | 0.0038              | 0.0250     | -0.39  | 0.0114              | 0.0765     | -0.35  | 0.0167              | 0.0849     | -0.28  | 0.2862 | 0.5521 | -5.13 | 0.3373 | 0.6950 | 1.11  | 0.2523 | 0.3236 | 0.87  |
| 3947 Ribosomal biogenesis protein LAS1L                              | Q9Y4W2  | 0.0082              | 0.0535     | 0.21   | 0.7474              | 0.8170     | -0.03  | 0.1883              | 0.3342     | 0.13   | 0.3277              | 0.4996     | 0.07   | 0.6429              | 0.7117     | 0.01   | 0.0054              | 0.0613     | 0.19   | 0.3736 | 0.6279 | -2.55 | 0.8708 | 1.2614 | -0.33 | 0.0651 | 0.2101 | 0.06  |
| 3948 Ribosomal oxygenase 1                                           | Q9HWG3  | 0.0017              | 0.0280     | -0.55  | 0.0310              | 0.5082     | -0.30  | 0.0092              | 0.0450     | -0.29  | 0.0012              | 0.0160     | -0.93  | 0.8090              | 0.2343     | -0.13  | 0.0856              | 0.2129     | 0.12   | 0.3736 | 0.5418 | -2.55 | 0.8708 | 1.1094 | -0.33 | 0.0651 | 0.1610 | 2.06  |
| 3949 Ribosomal protein S6 kinase alpha-1                             | Q15418  | 0.3629              | 0.5756     | 0.20   | 0.9071              | 0.9355     | -0.08  | 0.9425              | 0.9556     | -0.01  | 0.0808              | 0.1656     | -0.41  | 0.1873              | 0.3827     | -0.23  | 0.8071              | 1.0444     | -0.05  | 0.0734 | 0.2148 | 0.14  | 0.7865 | 1.2305 | 0.02  | 0.0490 | 0.1936 | 0.18  |
| 3950 Ribosomal protein S6 kinase alpha-2                             | Q15349  | 0.7010              | 0.7546     | -0.03  | 0.8999              | 0.9216     | 0.02   | 0.7901              | 0.8280     | -0.02  | 0.5595              | 0.6100     | 0.09   | 0.2578              | 0.4780     | -0.11  | 0.6241              | 0.8593     | 0.04   | 0.0005 | 0.0375 | -0.42 | 0.0010 | 0.0278 | -0.34 | 0.0038 | 0.0608 | -0.56 |
| 3951 Ribosomal protein S6 kinase alpha-3                             | P51812  | 0.0001              | 0.0096     | 0.14   | 0.1633              | 0.6634     | 0.18   | 0.0067              | 0.0395     | 0.29   | 0.0013              | 0.0165     | 0.30   | 0.1808              | 0.4958     | -0.11  | 0.0015              | 0.0508     | 0.28   | 0.7336 | 0.6464 | -2.55 | 0.8708 | 1.2932 | -0.33 | 0.0651 | 0.2223 | 2.06  |
| 3952 Ribosomal protein S6 kinase beta-1                              | P23443  | 0.0050              | 0.0433     | 0.15   | 0.9581              | 0.9716     | 0.01   | 0.0911              | 0.1899     | 0.09   | 0.5596              | 0.6099     | 0.02   | 0.0009              | 0.0224     | -0.16  | 0.1289              | 0.2793     | 0.15   | 0.3736 | 0.5249 | -2.55 | 0.8708 | 1.0789 | -0.33 | 0.0651 | 0.1526 | 2.06  |
| 3953 Ribosomal protein S6 kinase delta-1                             | Q96S38  | 0.0154              | 0.0717     | 0.18   | 0.3860              | 0.7305     | 0.16   | 0.0097              | 0.0458     | 0.31   | 0.0080              | 0.0362     | 0.22   | 0.4243              | 0.1127     | 0.16   | 0.0111              | 0.0723     | 0.29   | 0.1656 | 0.3604 | -0.25 | 0.2692 | 0.6005 | -0.15 | 0.6288 | 0.6863 | -0.04 |
| 3954 Ribosomal RNA processing protein 1 homolog A                    | P56182  | 0.5441              | 0.6140     | -0.37  | 0.2907              | 0.6690     | -2.19  | 0.6140              | 0.6687     | -0.19  | 0.0581              | 0.1284     | -0.40  | 0.6078              | 0.6822     | 0.16   | 0.9150              | 1.1518     | -0.03  | 0.0061 | 0.0829 | -0.88 | 0.1169 | 0.3521 | 0.42  | 0.0536 | 0.2039 | -0.36 |
| 3955 Ribosomal RNA processing protein 36 homolog                     | Q96E06  | 0.5446              | 0.6143     | 0.19   | 0.9648              | 0.9757     | 0.01   | 0.5276              | 0.7488     | -0.14  | 0.0089              | 0.0380     | -0.26  | 0.0251              | 0.1142     | 0.38   | 0.2858              | 0.4822     | -0.26  | 0.3736 | 0.4844 | -2.55 | 0.8708 | 1.0048 | -0.33 | 0.0651 | 0.1339 | 2.06  |
| 3956 Ribosome biogenesis protein BMS1 homolog                        | Q14692  | 0.5056              | 0.5785     | -0.07  | 0.3451              | 0.7024     | -0.23  | 0.1449              | 0.2716     | -0.20  | 0.6276              | 0.6739     | 0.05   | 0.3967              | 0.4929     | 0.10   | 0.2405              | 0.4263     | 0.14   | 0.2705 | 0.5136 | 0.15  | 0.4553 | 0.8595 | 0.02  | 0.0025 | 0.0537 | 0.41  |
| 3957 Ribosome biogenesis protein BOP1                                | Q14137  | 0.0374              | 0.1215     | -0.93  | 0.3060              | 0.6783     | -0.68  | 0.0008              | 0.0204     | -3.30  | 0.0168              | 0.0541     | -2.20  | 0.7013              | 0.7627     | -0.11  | 0.0275              | 0.1064     | -1.22  | 0.2820 | 0.5314 | 0.88  | 0.0956 | 0.3085 | 1.63  | 0.0780 | 0.1286 | 1.98  |
| 3958 Ribosome biogenesis protein WDR12                               | Q9GZL7  | 0.1054              | 0.2329     | 0.08   | 0.5211              | 0.8406     | 0.08   | 0.3476              | 0.5414     | -0.06  | 0.4781              | 0.6783     | -0.03  | 0.0090              | 0.0671     | -0.22  | 0.1173              | 0.2611     | -0.05  | 0.0167 | 0.1201 | -1.42 | 0.0124 | 0.0921 | -1.62 | 0.0050 | 0.0683 | -1.28 |
| 3959 Ribosome maturation protein SBDS                                | Q9Y3A5  | 0.4108              | 0.5174     | -3.31  | 0.5752              | 0.7244     | -1.75  | 0.5661              | 0.6578     | -1.19  | 0.4744              | 0.6223     | 0.89   | 0.2938              | 0.4175     | -1.88  | 0.9510              | 1.0066     | 0.36   | 0.0296 | 0.4099 | -0.17 | 0.3136 | 0.5181 | 0.02  | 0.0051 | 0.1185 | 0.02  |
| 3960 Ribosome-binding protein 1                                      | Q9P2F9  | 0.0023              | 0.0238     | 0.26   | 0.9353              | 0.9301     | 0.29   | 0.0004              | 0.0218     | -0.42  | 0.0002              | 0.0120     | -0.55  | 0.0200              | 0.0358     | 0.37   | 0.0020              | 0.0331     | 0.56   | 0.2909 | 0.1474 | -0.47 | 0.8592 | 1.3010 | 0.02  | 0.1409 | 0.3023 | 0.13  |
| 3961 Ribosome-recycling factor mitochondrial                         | Q96E11  | 0.0056              | 0.0452     | 0.38   | 0.1225              | 0.6384     | 0.62   | 0.0066              | 0.1550     | 0.28   | 0.0298              | 0.0800     | 0.32   | 0.9718              | 0.9778     | 0.00   | 0.2336              | 0.4177     | 0.27   | 0.1174 | 0.2851 | -0.31 | 0.0105 | 0.0842 | -0.23 | 0.2003 | 0.2687 | -0.11 |
| 3962 Ribosylhydrolase/oxalacetate dehydrogenase [quinone]            | P16083  | 0.0904              | 0.2106     | 0.51   | 0.2658              | 0.6629     | -0.28  | 0.0002              | 0.0164     | 1.05   | 0.0053              | 0.0295     | 0.99   | 0.0003              | 0.0147     | 0.77   | 0.0227              | 0.0965     | 1.19   | 0.3736 | 0.5897 | -2.55 | 0.8708 | 1.1946 | -0.33 | 0.0651 | 0.1868 | 2.06  |
| 3963 RILP-like protein 2                                             | Q969X0  | 0.2504              | 0.4367     | -0.40  | 0.1149              | 0.6332     | -0.20  | 0.2037              | 0.3561     | -0.14  | 0.1050              | 0.2011     | -0.19  | 0.0365              | 0.1388     | -0.29  | 0.1188              | 0.2633     | -0.37  | 0.3736 | 0.5277 | -2.55 | 0.8708 | 1.0841 | -0.33 | 0.0651 | 0.1540 | 2.06  |
| 3964 RIMS-binding protein 3C                                         | AGN1Z7  | 0.0173              | 0.0769     | -1.06  | 0.2202              | 0.6601     | -0.78  | 0.0703              | 0.1576     | -0.51  | 0.0647              | 0.1396     | -0.53  | 0.3527              | 0.0454     | -0.21  | 0.0910              | 0.2202     | -0.46  | 0.3736 | 0.5370 | -2.55 | 0.8708 | 1.1007 | -0.33 | 0.0651 | 0.1585 | 2.06  |
| 3965 RING finger and CHY zinc finger domain-containing protein 1     | Q96PM5  | 0.6567              | 0.7174     | -0.04  | 0.7524              | 0.8205     | -0.04  | 0.6800              | 0.7299     | -0.03  | 0.2045              | 0.3382     | -0.10  | 0.6748              | 0.7385     | 0.04   | 0.7617              | 0.9996     | -0.04  | 0.5561 | 0.6067 | 0.12  | 0.3879 | 0.7687 | 0.18  | 0.4680 | 0.5365 | -0.30 |
| 3966 RING finger protein 122                                         | Q9H9V4  | 0.6180              | 0.6818     | 0.04   | 0.4724              | 0.8013     | 0.06   | 0.0494              | 0.1239     | -0.23  | 0.1306              | 0.2373     | -0.14  | 0.0144              | 0.0852     | 0.32   | 0.0369              | 0.1245     | -0.29  | 0.3736 | 0.5719 | -2.55 | 0.8708 | 1.1632 | -0.33 | 0.0651 | 0.1768 | 2.06  |
| 3967 RING finger protein 212B                                        | ASMTL3  | 0.9265              | 0.9440     | 0.00   | 0.2761              | 0.6643     | 0.15   | 0.0504              | 0.1259     | 0.15   | 0.2540              | 0.4040     | 0.07   | 0.0304              | 0.1271     | 0.17   | 0.0692              | 0.1850     | 0.14   | 0.3736 | 0.5496 | -2.55 | 0.8708 | 1.1235 | -0.33 | 0.0651 | 0.1650 | 2.06  |
| 3968 RING-box protein 2                                              | Q9UBF6  | 0.2494              | 0.4357     | -0.21  | 0.8864              | 0.9190     | -0.02  | 0.5209              | 0.7419     | -0.10  | 0.1471              | 0.2610     | -0.29  | 0.1968              | 0.3964     | 0.25   | 0.8591              | 1.0947     | 0.03   | 0.3736 | 0.4356 | -2.55 | 0.8708 | 0.9137 | -0.33 | 0.0651 | 0.1137 | 2.06  |
| 3969 RNA binding motif protein X-linked-like-1                       | Q96E39  | 0.4108              | 0.5172     | -3.31  | 0.5752              | 0.7242     | -1.75  | 0.5661              | 0.6576     | -1.19  | 0.5388              | 0.6222     | 0.89   | 0.2938              | 0.4174     | -1.88  | 0.9510              | 1.0064     | 0.09   | 0.1778 | 0.3770 | -0.12 | 0.0503 | 0.2110 | -0.25 | 0.0878 | 0.1405 | -0.11 |
| 3970 RNA binding protein fox-1 homolog 1                             | Q9NWB1  | 0.1918              | 0.3584     | -0.26  | 0.1176              | 0.6313     | -0.72  | 0.2922              | 0.4724     | -0.18  | 0.4974              | 0.7011     | -0.15  | 0.0509              | 0.1669     | 0.46   | 0.1169              | 0.2606     | 0.34   | 0.3736 | 0.5286 | -2.55 | 0.8708 | 1.0856 | -0.33 | 0.0651 | 0.1544 | 2.06  |
| 3971 RNA polymerase II subunit A C-terminal domain phosphatase SSU72 | Q9NP77  | 0.4108              | 0.5171     | -3.31  | 0.5752              | 0.7241     | -1.75  | 0.5661              | 0.6575     | -1.19  | 0.5388              | 0.6222     | 0.89   | 0.2938              | 0.4173     | -1.88  | 0.9510              | 1.0062     | 0.09   | 0.0009 | 0.0405 | -0.80 | 0.0008 | 0.0259 | -1.08 | 0.0124 | 0.0963 | -1.17 |
| 3972 RNA polymerase II-associated factor 1 homolog                   | Q8N7H5  | 0.5228              | 0.5944     | -0.18  | 0.7497              | 0.8186     | 0.16   | 0.7101              | 0.7559     | -0.07  | 0.8204              | 0.8445     | -0.11  | 0.1684              | 0.3549     | -0.20  | 0.5992              | 0.8355     | 0.07   | 0.3736 | 0.4526 | -2.55 | 0.8708 | 0.9456 | -0.33 | 0.0651 | 0.1205 | 2.06  |
| 3973 RNA polymerase II-associated protein 3                          | Q9HG73  | 0.0233              | 0.0914     | 0.26   | 0.2704              | 0.6638     | 0.14   | 0.0083              | 0.0430     | 0.39   | 0.0126              | 0.0455     | 0.30   | 0.1181              | 0.2820     | 0.13   | 0.0277              | 0.1910     | 0.20   | 0.0470 | 0.1739 | 0.41  | 0.8297 | 1.2731 | 0.02  | 0.8452 | 0.8751 | 0.01  |
| 3974 RNA polymerase II-associated protein CTR9 homolog               | O6PD62  | 0.0348              | 0.1167     | -0.49  | 0.5809              | 0.8826     | -0.23  | 0.0089              | 0.0439     | 0.69   | 0.2947              | 0.4579     | 0.16   | 0.0893              | 0.2347     | 0.23   | 0.0678              | 0.1418     | 0.26   | 0.0777 | 0.2216 | 0.39  | 0.9536 | 0.9669 | 0.01  | 0.0209 | 0.1234 | 0.28  |
| 3975 RNA polymerase-associated protein RTF1 homolog                  | Q92541  | 0.0661              | 0.1703     | 0.16   | 0.0617              | 0.5919     | 0.17   | 0.2615              | 0.4311     | 0.08   | 0.1059              | 0.2026     | 0.13   | 0.1429              | 0.2918     | 0.13   | 0.5693              | 0.8040     | 0.08   | 0.2820 | 0.5312 | -0.30 | 0.1696 | 0.4501 | 0.21  | 0.0412 | 0.1761 | 0.31  |
| 3976 RNA transcription, translation and transport factor protein     | Q9Y224  | 0.7975              | 0.8361     | 0.04   | 0.3476              | 0.7036     | -0.15  | 0.0511              | 0.1271     | 0.19   | 0.0120              | 0.0439     | 0.34   | 0.0447              | 0.1561     | 0.17   | 0.0443              | 0.1388     | 0.40   | 0.1580 | 0.3499 | 0.07  | 0.0550 | 0.2240 | -0.14 | 0.0117 | 0.0937 | -0.22 |
| 3977 RNA-binding motif protein X chromosome                          | P38159  | 0.0129              | 0.0663     | -0.25  | 0.3268              | 0.6862     | -0.08  | 0.8515              | 0.8813     | 0.01   | 0.0451              | 0.0671     | -0.03  | 0.1446              | 0.3190     | 0.08   | 0.1690              | 0.3339     | -0.06  | 0.0539 | 0.1843 | 0.41  | 0.0219 | 0.1283 | 0.36  | 0.0403 | 0.1738 | 0.39  |
| 3978 RNA-binding motif protein X-linked-like-2                       | Q75526  | 0.0356              | 0.1179     | -0.20  | 0.3126              | 0.6807     | 0.07   | 0.0003              | 0.0194     | -0.67  | 0.0015              | 0.0179     | -0.45  | 0.2502              | 0.1653     | -0.27  | 0.0018              | 0.0527     | -0.56  | 0.0543 | 0.1852 | 0.41  | 0.8834 | 0.9119 | 0.02  | 0.2843 | 0.3563 | 0.15  |
| 3979 RNA-binding motif protein X-linked-like-3                       | Q8N7X1  | 0.4108              | 0.5170     | -3.31  | 0.5752              | 0.7239     | -1.75  | 0.5661              | 0.6573     | -1.19  | 0.5388              | 0.6219     | 0.89   | 0.2938              | 0.4172     | -1.88  | 0.9510              | 1.0060     | 0.09   | 0.0002 | 0.0288 | 0.75  | 0.0009 | 0.0274 | 0.73  | 0.0018 | 0.0499 | 0.79  |
| 3980 RNA-binding protein 12                                          | Q9NTZ6  | 0.2160              | 0.3911     | -0.06  | 0.5765              | 0.6857     | 0.07   | 0.1760              | 0.3183     | -0.07  | 0.2914              | 0.4524     | -0.05  | 0.0434              | 0.1540     | -0.13  | 0.0557              | 0.1        |        |        |        |       |        |        |       |        |        |       |

Supplementary Table S2. Overview on all relatively quantified 5180 proteins statistical analysis

|      | Protein name                                           | UniProt | MCF-7               |            |                     |         | MDA-MB-231          |        |                     |            |
|------|--------------------------------------------------------|---------|---------------------|------------|---------------------|---------|---------------------|--------|---------------------|------------|
|      |                                                        |         | Dai SC20 vs control |            | Gen SC20 vs control |         | SSE SC20 vs control |        | Dai IC20 vs control |            |
|      |                                                        |         | p value             | BH q value | log2FC              | p value | BH q value          | log2FC | p value             | BH q value |
| 4015 | Sadenosylmethionine synthase isoform type-1            | Q00266  | 0.3832              | 0.5993     | 0.71                | 0.3140  | 0.6800              | -1.95  | 0.0229              | 0.0744     |
| 4016 | Sadenosylmethionine synthase isoform type-2            | P11153  | 0.0093              | 0.0571     | -0.07               | 0.7802  | 0.8416              | -0.04  | 0.7527              | 0.7944     |
| 4017 | SAM domain-containing protein SAMSN-1                  | Q9NSI8  | 0.4108              | 0.5162     | -3.31               | 0.5752  | 0.7228              | -1.75  | 0.5661              | 0.6565     |
| 4018 | SAM pointed domain-containing Ets transcription factor | O95238  | 0.3342              | 0.5406     | -0.11               | 0.7096  | 0.7868              | -0.06  | 0.6692              | 0.7195     |
| 4019 | SAP domain-containing ribonucleoprotein                | P82979  | 0.4108              | 0.5161     | -3.31               | 0.5752  | 0.7227              | -1.75  | 0.5661              | 0.6565     |
| 4020 | SAP30-binding protein                                  | Q9UIH5  | 0.1039              | 0.2306     | -0.57               | 0.0470  | 0.6114              | -0.74  | 0.1475              | 0.2756     |
| 4021 | Sarcomal membrane-associated protein                   | Q14BNA  | 0.0368              | 0.1206     | 0.20                | 0.0780  | 0.6199              | 0.54   | 0.7322              | 0.5774     |
| 4022 | Sarcoplasmic/endoplasmic reticulum calcium ATPase 1    | O14983  | 0.3394              | 0.5472     | -0.07               | 0.0994  | 0.6357              | 0.18   | 0.6240              | 0.6776     |
| 4023 | Sarcoplasmic/endoplasmic reticulum calcium ATPase 2    | P16615  | 0.0094              | 0.0572     | 0.16                | 0.1367  | 0.6520              | 0.26   | 0.0003              | 0.0213     |
| 4024 | Sarcoplasmic/endoplasmic reticulum calcium ATPase 3    | Q93084  | 0.0030              | 0.0361     | -0.30               | 0.8811  | 0.9143              | -0.01  | 0.0011              | 0.0213     |
| 4025 | S-arrestin                                             | P10523  | 0.4108              | 0.5160     | -3.31               | 0.5752  | 0.7225              | -1.75  | 0.5661              | 0.6562     |
| 4026 | Scaffold attachment factor B1                          | Q15424  | 0.4108              | 0.5159     | -3.31               | 0.5752  | 0.7223              | -1.75  | 0.5661              | 0.6560     |
| 4027 | Scaffold attachment factor B2                          | Q14151  | 0.7908              | 0.8307     | 0.06                | 0.2843  | 0.6646              | -2.02  | 0.3176              | 0.5045     |
| 4028 | Scavenger receptor class B member 1                    | Q8WTV0  | 0.7039              | 0.7566     | -0.04               | 0.8956  | 0.9262              | 0.03   | 0.0352              | 0.0976     |
| 4029 | Scavenger receptor cysteine-rich type 1 protein M160   | Q9NR16  | 0.0223              | 0.0890     | 0.14                | 0.1140  | 0.6343              | 0.27   | 0.0136              | 0.0547     |
| 4030 | Schlafen family member 11                              | Q7Z7L1  | 0.0237              | 0.0924     | 0.17                | 0.1806  | 0.6644              | 0.29   | 0.0376              | 0.1020     |
| 4031 | Schwannomin-interacting protein 1                      | PD0PB3  | 0.4108              | 0.5157     | -3.31               | 0.5752  | 0.7221              | -1.75  | 0.5661              | 0.6559     |
| 4032 | SCL-interacting locus protein                          | Q15468  | 0.6747              | 0.7324     | -0.02               | 0.6434  | 0.7951              | 0.13   | 0.0816              | 0.1754     |
| 4033 | SCY1-like protein 2                                    | O6P3W7  | 0.0598              | 0.1618     | -0.31               | 0.5974  | 0.7014              | -0.11  | 0.2027              | 0.3547     |
| 4034 | Sec1 family domain-containing protein 1                | Q8WVM8  | 0.0036              | 0.0383     | -0.31               | 0.2362  | 0.6639              | 0.17   | 0.0019              | 0.0242     |
| 4035 | Sec1 family domain-containing protein 2                | Q8WVU7  | 0.4108              | 0.5156     | -3.31               | 0.5752  | 0.7220              | -1.75  | 0.5661              | 0.6557     |
| 4036 | SFIC23-interacting protein                             | Q9YYSX  | 0.0103              | 0.0589     | 0.14                | 0.2691  | 0.6628              | 0.11   | 0.3295              | 0.5191     |
| 4037 | Secernin-1                                             | Q12765  | 0.0213              | 0.0867     | 0.11                | 0.0806  | 0.6140              | 0.26   | 0.0271              | 0.0825     |
| 4038 | Secernin-2                                             | Q96FV2  | 0.0035              | 0.0378     | -0.95               | 0.5858  | 0.6918              | -0.23  | 0.5481              | 0.7711     |
| 4039 | Secotransaminase                                       | P05060  | 0.0915              | 0.2121     | -0.28               | 0.6454  | 0.7383              | -0.23  | 0.0105              | 0.0476     |
| 4040 | Secotransaminase-1                                     | P13521  | 0.4108              | 0.5155     | -3.31               | 0.5752  | 0.7218              | -1.75  | 0.5661              | 0.6556     |
| 4041 | Secretory carrier-associated membrane protein 1        | O15126  | 0.1475              | 0.2958     | -0.07               | 0.6293  | 0.7262              | 0.06   | 0.0118              | 0.0508     |
| 4042 | Secretory carrier-associated membrane protein 2        | O15127  | 0.0147              | 0.0704     | -0.65               | 0.5600  | 0.7079              | -0.90  | 0.3872              | 0.5885     |
| 4043 | Secretory carrier-associated membrane protein 3        | O14828  | 0.0869              | 0.2050     | 0.06                | 0.3846  | 0.7303              | 0.08   | 0.0200              | 0.0682     |
| 4044 | Secretory carrier-associated membrane protein 4        | Q969E2  | 0.1438              | 0.2907     | -0.07               | 0.2016  | 0.6601              | 0.17   | 0.2886              | 0.4676     |
| 4045 | Sedohexulokinase                                       | Q9UHH6  | 0.4108              | 0.5154     | -3.31               | 0.5752  | 0.7216              | -1.75  | 0.5661              | 0.6554     |
| 4046 | Segment polarity protein dishevelled homolog DVL-2     | O14641  | 0.0145              | 0.0699     | 0.43                | 0.0458  | 0.5595              | 0.57   | 0.0008              | 0.0222     |
| 4047 | Segment polarity protein dishevelled homolog DVL-3     | Q92997  | 0.4108              | 0.5152     | -3.31               | 0.5752  | 0.7214              | -1.75  | 0.5661              | 0.6553     |
| 4048 | Selenide water dikinase 1                              | P49903  | 0.1435              | 0.2904     | -0.09               | 0.9814  | 0.9871              | 0.00   | 0.3360              | 0.5316     |
| 4049 | Separin                                                | Q14674  | 0.0851              | 0.2017     | -0.60               | 0.1185  | 0.6328              | -0.51  | 0.1421              | 0.2680     |
| 4050 | Serine peptidase                                       | P35270  | 0.0608              | 0.1633     | 0.07                | 0.1830  | 0.6648              | 0.28   | 0.0212              | 0.0645     |
| 4051 | Serpin-10                                              | Q9P0V9  | 0.0000              | 0.0000     | -1.23               | 0.1649  | 0.6655              | -1.17  | 0.0017              | 0.0237     |
| 4052 | Serpin-11                                              | Q9N1A2  | 0.3754              | 0.5907     | -0.91               | 0.1427  | 0.6547              | 0.23   | 0.0270              | 0.0824     |
| 4053 | Serpin-14                                              | Q9ZU15  | 0.0690              | 0.1748     | -0.60               | 0.2899  | 0.6686              | -1.02  | 0.3775              | 0.1018     |
| 4054 | Serpin-1                                               | Q15019  | 0.0538              | 0.1513     | 0.12                | 0.3108  | 0.6796              | 0.13   | 0.0124              | 0.0523     |
| 4055 | Serpin-4                                               | Q43236  | 0.1311              | 0.2729     | -0.11               | 0.2276  | 0.6654              | 0.14   | 0.7059              | 0.7524     |
| 4056 | Serpin-6                                               | Q14141  | 0.8037              | 0.8416     | 0.01                | 0.1905  | 0.6686              | 0.27   | 0.3585              | 0.5553     |
| 4057 | Serpin-7                                               | P16181  | 0.0174              | 0.0772     | 0.12                | 0.0271  | 0.5050              | 0.12   | 0.0067              | 0.0396     |
| 4058 | Serpin-8                                               | Q92599  | 0.3467              | 0.5557     | -0.10               | 0.6116  | 0.7129              | 0.06   | 0.7888              | 0.8270     |
| 4059 | Serpin-9                                               | Q9UHD8  | 0.0717              | 0.1799     | 0.12                | 0.2717  | 0.6651              | 0.20   | 0.0085              | 0.0435     |
| 4060 | Sequestosome-1                                         | Q13501  | 0.0225              | 0.0893     | -0.20               | 0.0266  | 0.4974              | -0.36  | 0.9433              | 0.9557     |
| 4061 | Serine dehydratase-like                                | Q96GA7  | 0.0074              | 0.0506     | 0.10                | 0.5286  | 0.8472              | 0.07   | 0.0015              | 0.0225     |
| 4062 | Serine hydroxymethyltransferase cytosolic              | P34896  | 0.9235              | 0.9413     | 0.00                | 0.0611  | 0.5938              | -0.16  | 0.1816              | 0.3257     |
| 4063 | Serine hydroxymethyltransferase mitochondrial          | P34897  | 0.0072              | 0.0501     | 0.25                | 0.8772  | 0.7293              | 0.14   | 0.0059              | 0.0440     |
| 4064 | Serine palmitoyltransferase 1                          | O15269  | 0.0487              | 0.1414     | -0.11               | 0.6927  | 0.7745              | 0.06   | 0.7788              | 0.8183     |
| 4065 | Serine palmitoyltransferase 2                          | O15270  | 0.0024              | 0.0331     | 0.12                | 0.0448  | 0.5674              | 0.28   | 0.0178              | 0.0637     |
| 4066 | Serine protease 33                                     | Q8NF86  | 0.4108              | 0.5151     | -3.31               | 0.5752  | 0.7213              | -1.75  | 0.5661              | 0.6551     |
| 4067 | Serine protease 38                                     | A1L453  | 0.0877              | 0.2062     | -0.38               | 0.1593  | 0.6644              | -0.64  | 0.2421              | 0.4064     |
| 4068 | Serine protease HTRA1                                  | Q92743  | 0.2928              | 0.4907     | -0.20               | 0.6839  | 0.7695              | 0.10   | 0.3905              | 0.6468     |
| 4069 | Serine protease inhibitor Kazal-type 5                 | Q8NC38  | 0.9436              | 0.9577     | 0.01                | 0.1523  | 0.6596              | 0.21   | 0.4460              | 0.6591     |
| 4070 | Serine protease inhibitor Kazal-type 8                 | POCT11  | 0.0056              | 0.0401     | 3.91                | 0.1129  | 0.6250              | -0.65  | 0.0443              | 0.1150     |
| 4071 | Serine racemase                                        | Q9GZT4  | 0.4108              | 0.5150     | -3.31               | 0.5752  | 0.7211              | -1.75  | 0.5661              | 0.6550     |
| 4072 | Serine/arginine repetitive matrix protein 1            | Q8IYB3  | 0.0609              | 0.1635     | -12.21              | 0.2164  | 0.6598              | -1.34  | 0.7843              | 0.8229     |
| 4073 | Serine/arginine repetitive matrix protein 2            | Q9LUQ35 | 0.4074              | 0.6281     | -0.04               | 0.4003  | 0.7437              | 0.14   | 0.0024              | 0.0270     |
| 4074 | Serine/arginine-rich splicing factor 1                 | Q07955  | 0.3950              | 0.6132     | 0.05                | 0.4893  | 0.8124              | 0.07   | 0.0057              | 0.0365     |
| 4075 | Serine/arginine-rich splicing factor 11                | Q05519  | 0.4108              | 0.5149     | -3.31               | 0.5752  | 0.7209              | -1.75  | 0.5661              | 0.6548     |
| 4076 | Serine/arginine-rich splicing factor 2                 | Q01130  | 0.0376              | 0.1217     | 0.16                | 0.1435  | 0.6549              | 0.12   | 0.0046              | 0.0336     |
| 4077 | Serine/arginine-rich splicing factor 3                 | P84103  | 0.1885              | 0.3543     | -0.40               | 0.5168  | 0.8389              | -0.05  | 0.0018              | 0.0236     |
| 4078 | Serine/arginine-rich splicing factor 4                 | Q08170  | 0.2784              | 0.4722     | 0.30                | 0.4048  | 0.7478              | 0.38   | 0.0594              | 0.1409     |
| 4079 | Serine/arginine-rich splicing factor 5                 | Q13243  | 0.9735              | 0.9815     | 0.00                | 0.7689  | 0.8324              | 0.03   | 0.0319              | 0.0915     |
| 4080 | Serine/arginine-rich splicing factor 6                 | Q13247  | 0.0679              | 0.1732     | 0.13                | 0.2400  | 0.6613              | 0.21   | 0.0139              | 0.0553     |
| 4081 | Serine/arginine-rich splicing factor 7                 | O16629  | 0.0003              | 0.0144     | -0.24               | 0.0006  | 0.2391              | -0.22  | 0.0044              | 0.0329     |
| 4082 | Serine/arginine-rich splicing factor 8                 | Q9BR16  | 0.1176              | 0.2520     | 0.26                | 0.1652  | 0.6608              | 1.03   | 0.1554              | 0.2873     |
| 4083 | Serine/arginine-rich splicing factor 9                 | Q13242  | 0.4747              | 0.5502     | -0.21               | 0.1697  | 0.6619              | -1.21  | 0.0098              | 0.0461     |
| 4084 | Serine/threonine-protein kinase                        | Q95747  | 0.1962              | 0.3652     | 0.05                | 0.5986  | 0.7020              | 0.03   | 0.8922              | 0.9141     |
| 4085 | Serine/threonine-protein kinase 10                     | Q94804  | 0.0402              | 0.1261     | -0.32               | 0.9537  | 0.9692              | 0.01   | 0.1392              | 0.2636     |
| 4086 | Serine/threonine-protein kinase 17A                    | O4108   | 0.5147              | 0.5147     | -3.31               | 0.5752  | 0.7207              | -1.75  | 0.5661              | 0.6547     |
| 4087 | Serine/threonine-protein kinase 19                     | P49842  | 0.7265              | 0.7771     | -0.05               | 0.0645  | 0.5882              | 0.31   | 0.5058              | 0.7280     |
| 4088 | Serine/threonine-protein kinase 24                     | Q9Y6E0  | 0.2967              | 0.4951     | 0.12                | 0.2331  | 0.6623              | 0.22   | 0.8906              | 0.9126     |
| 4089 | Serine/threonine-protein kinase 25                     | O05056  | 0.0100              | 0.0583     | -1.25               | 0.6386  | 0.7335              | -0.29  | 0.0028              | 0.0288     |
| 4090 | Serine/threonine-protein kinase 26                     | Q9P289  | 0.2683              | 0.4600     | 0.07                | 0.8663  | 0.9033              | -0.02  | 0.1088              | 0.2184     |
| 4091 | Serine/threonine-protein kinase 3                      | P13188  | 0.4108              | 0.5146     | -3.31               | 0.5752  | 0.7206              | -1.75  | 0.5661              | 0.6546     |
| 4092 | Serine/threonine-protein kinase 31                     | Q9BXU1  | 0.4108              | 0.5145     | -3.31               | 0.5752  | 0.7204              | -1.75  | 0.5661              | 0.6544     |
| 4093 | Serine/threonine-protein kinase 32A                    | Q8WU08  | 0.4108              | 0.5144     | -3.31               | 0.5752  | 0.7202              | -1.75  | 0.5661              | 0.6543     |
| 4094 | Serine/threonine-protein kinase 38-like                | Q9Y2H1  | 0.7739              | 0.8160     | -0.03               | 0.2335  | 0.6617              | 0.13   | 0.2384              | 0.4007     |
| 4095 | Serine/threonine-protein kinase 4                      | Q13043  | 0.0727              | 0.1817     | -10.98              | 0.0626  | 0.5907              | -9.42  | 0.0241              | 0.0764     |
| 4096 | Serine/threonine-protein kinase ATR                    | Q13535  | 0.4578              | 0.5348     | -0.02               | 0.5002  | 0.8231              | -0.03  | 0.0136              | 0.0545     |
| 4097 | Serine/threonine-protein kinase Chk1                   | O14757  | 0.4108              | 0.5142     | -3.31               | 0.5752  | 0.7200              | -1.75  | 0.5661              | 0.6541     |
| 4098 | Serine/threonine-protein kinase greatwall              | Q96GX5  | 0.6168              | 0.6810     | 0.07                | 0.1760  | 0.6616              | -0.23  | 0.1082              | 0.2174     |

Supplementary Table S2. Overview on all relatively quantified 5180 proteins statistical analysis

| MCF-7                                                                                  |         |                     |            |        |                     |            |        |                     |            | MDA-MB-231 |                     |            |        |                     |            |        |                     |            |        |                     |            |        |                     |            |        |                     |            |        |
|----------------------------------------------------------------------------------------|---------|---------------------|------------|--------|---------------------|------------|--------|---------------------|------------|------------|---------------------|------------|--------|---------------------|------------|--------|---------------------|------------|--------|---------------------|------------|--------|---------------------|------------|--------|---------------------|------------|--------|
| Protein name                                                                           | UniProt | Dai SC20 vs control |            |        | Gen SC20 vs control |            |        | SSE SC20 vs control |            |            | Dai IC20 vs control |            |        | Gen IC20 vs control |            |        | SSE IC20 vs control |            |        | Dai IC20 vs control |            |        | Gen IC20 vs control |            |        | SSE IC20 vs control |            |        |
|                                                                                        |         | p value             | BH q value | log2FC | p value             | BH q value | log2FC | p value             | BH q value | log2FC     | p value             | BH q value | log2FC | p value             | BH q value | log2FC | p value             | BH q value | log2FC | p value             | BH q value | log2FC | p value             | BH q value | log2FC | p value             | BH q value | log2FC |
| 4099 Serine/threonine-protein kinase ICK                                               | Q9UPZ9  | 0.8646              | 0.8929     | -0.01  | 0.1109              | 0.6327     | 0.11   | 0.0147              | 0.0572     | 0.24       | 0.9796              | 0.9824     | 0.00   | 0.0123              | 0.0790     | 0.25   | 0.8859              | 1.1234     | -0.01  | 0.3736              | 0.4347     | -2.55  | 0.8708              | 0.9120     | -0.33  | 0.0651              | 0.1134     | 2.06   |
| 4100 Serine/threonine-protein kinase MAK                                               | P20794  | 0.5883              | 0.6549     | -0.12  | 0.3280              | 0.6876     | -0.45  | 0.3169              | 0.5038     | -0.25      | 0.3412              | 0.5156     | -0.24  | 0.3957              | 0.4925     | -0.22  | 0.4602              | 0.6827     | -0.18  | 0.1072              | 0.2674     | -0.38  | 0.7435              | 1.1861     | -0.02  | 0.0304              | 0.1473     | 0.10   |
| 4101 Serine/threonine-protein kinase MARK1                                             | Q9P0L2  | 0.0933              | 0.2150     | -9.52  | 0.0844              | 0.6228     | -7.96  | 0.0337              | 0.0951     | -7.41      | 0.0033              | 0.0233     | -5.32  | 0.5886              | 0.6657     | 0.26   | 0.0178              | 0.0871     | -6.13  | 0.3736              | 0.5966     | -2.55  | 0.8708              | 1.2067     | -0.33  | 0.0651              | 0.1908     | 2.06   |
| 4102 Serine/threonine-protein kinase MARK2                                             | Q7KZ17  | 0.0352              | 0.1171     | -0.21  | 0.8875              | 0.9196     | 0.02   | 0.8823              | 0.9070     | -0.01      | 0.9367              | 0.9445     | -0.01  | 0.5310              | 0.6167     | 0.05   | 0.2834              | 0.4797     | -0.15  | 0.3723              | 0.6542     | 0.09   | 0.9205              | 0.9416     | -0.01  | 0.0297              | 0.1468     | 0.29   |
| 4103 Serine/threonine-protein kinase MRCK beta                                         | Q9Y5S2  | 0.0381              | 0.1225     | -0.27  | 0.2768              | 0.6650     | 0.11   | 0.0540              | 0.1319     | -0.14      | 0.0026              | 0.0213     | 0.17   | 0.1660              | 0.3521     | 0.08   | 0.3322              | 0.5352     | -0.11  | 0.3736              | 0.4762     | -2.55  | 0.8708              | 0.9896     | -0.33  | 0.0651              | 0.1304     | 2.06   |
| 4104 Serine/threonine-protein kinase N2                                                | Q16513  | 0.4108              | 0.5141     | -3.31  | 0.5752              | 0.7199     | -1.75  | 0.5661              | 0.6540     | -1.19      | 0.5388              | 0.6187     | 0.89   | 0.2938              | 0.4146     | -1.88  | 0.9510              | 1.0013     | 0.09   | 0.3169              | 0.5792     | 0.32   | 0.0822              | 0.2820     | 0.70   | 0.0681              | 0.1155     | 0.86   |
| 4105 Serine/threonine-protein kinase Nek1                                              | Q8NG66  | 0.0160              | 0.0737     | 0.23   | 0.2902              | 0.6684     | 0.23   | 0.0104              | 0.0475     | 0.27       | 0.0075              | 0.0351     | 0.34   | 0.0829              | 0.2230     | 0.11   | 0.3191              | 0.5218     | 0.08   | 0.3736              | 0.4788     | -2.55  | 0.8708              | 0.9944     | -0.33  | 0.0651              | 0.1315     | 2.06   |
| 4106 Serine/threonine-protein kinase Nek8                                              | Q8SG66  | 0.1722              | 0.3331     | -0.20  | 0.0128              | 0.4450     | 0.29   | 0.0625              | 0.1453     | -0.22      | 0.9268              | 0.9360     | 0.01   | 0.0348              | 0.1353     | 0.22   | 0.2101              | 0.3909     | -0.28  | 0.3736              | 0.5005     | -2.55  | 0.8708              | 1.0343     | -0.33  | 0.0651              | 0.1411     | 2.06   |
| 4107 Serine/threonine-protein kinase PAK 1                                             | Q13153  | 0.1467              | 0.2949     | -0.06  | 0.5737              | 0.8860     | -0.05  | 0.0031              | 0.0297     | 0.38       | 0.6471              | 0.6911     | -0.04  | 0.1182              | 0.2820     | -0.16  | 0.8091              | 1.0460     | -0.02  | 0.0036              | 0.0652     | 0.47   | 0.7317              | 1.1756     | 0.03   | 0.0093              | 0.0859     | 0.75   |
| 4108 Serine/threonine-protein kinase PAK 2                                             | Q13177  | 0.2492              | 0.4357     | 0.05   | 0.4916              | 0.8141     | 0.11   | 0.6577              | 0.7090     | 0.02       | 0.9694              | 0.9737     | 0.00   | 0.0165              | 0.0914     | -0.16  | 0.4435              | 0.6649     | 0.03   | 0.5378              | 0.5895     | 0.05   | 0.2897              | 0.6292     | -0.08  | 0.0098              | 0.0872     | -0.21  |
| 4109 Serine/threonine-protein kinase PAK 3                                             | Q75914  | 0.0060              | 0.0466     | 0.13   | 0.3590              | 0.7087     | 0.13   | 0.0031              | 0.0299     | -0.13      | 0.1285              | 0.2344     | 0.12   | 0.0124              | 0.0793     | -0.11  | 0.2025              | 0.3803     | -0.09  | 0.0016              | 0.0525     | -0.61  | 0.0177              | 0.1131     | -0.30  | 0.0090              | 0.0848     | -0.61  |
| 4110 Serine/threonine-protein kinase PAK 4                                             | Q96013  | 0.0012              | 0.0237     | -0.29  | 0.2366              | 0.6632     | -0.14  | 0.0996              | 0.2034     | -0.17      | 0.0002              | 0.0086     | -0.47  | 0.0034              | 0.0437     | -0.23  | 0.0024              | 0.0560     | -0.31  | 0.3736              | 0.6423     | -2.55  | 0.8708              | 1.2862     | -0.33  | 0.0651              | 0.2195     | 2.06   |
| 4111 Serine/threonine-protein kinase PAK 6                                             | Q9NQUS  | 0.0019              | 0.0299     | 0.24   | 0.0412              | 0.5691     | 0.24   | 0.1217              | 0.2392     | 0.18       | 0.0233              | 0.0674     | 0.20   | 0.0050              | 0.0530     | 0.15   | 0.0178              | 0.0872     | 0.12   | 0.0674              | 0.2038     | 0.13   | 0.0165              | 0.1090     | -0.30  | 0.0074              | 0.0781     | -0.43  |
| 4112 Serine/threonine-protein kinase PLK1                                              | P53350  | 0.2431              | 0.4285     | 0.09   | 0.0467              | 0.5626     | 0.24   | 0.0778              | 0.1688     | 0.17       | 0.0678              | 0.1443     | 0.18   | 0.0123              | 0.0791     | 0.33   | 0.2665              | 0.4594     | 0.08   | 0.3736              | 0.4873     | -2.55  | 0.8708              | 1.0102     | -0.33  | 0.0651              | 0.1352     | 2.06   |
| 4113 Serine/threonine-protein kinase PLK2                                              | Q9NY93  | 0.6947              | 0.7491     | 0.03   | 0.0722              | 0.6062     | -0.15  | 0.0560              | 0.1352     | -0.17      | 0.1103              | 0.2091     | -0.16  | 0.0427              | 0.1526     | -0.19  | 0.1188              | 0.2632     | -0.13  | 0.5997              | 0.6479     | -0.03  | 0.1759              | 0.4606     | 0.09   | 0.2015              | 0.2697     | -0.08  |
| 4114 Serine/threonine-protein kinase PLK3                                              | Q9H4B4  | 0.0047              | 0.0431     | -0.30  | 0.2557              | 0.6626     | 0.07   | 0.1507              | 0.2804     | 0.08       | 0.8650              | 0.8839     | -0.01  | 0.9422              | 0.9557     | 0.00   | 0.8250              | 1.0591     | 0.01   | 0.1246              | 0.2972     | -0.31  | 0.4494              | 0.8521     | -0.12  | 0.3302              | 0.4013     | -0.16  |
| 4115 Serine/threonine-protein kinase PRP4 homolog                                      | Q13523  | 0.2080              | 0.3805     | 0.18   | 0.0144              | 0.4493     | -0.47  | 0.0147              | 0.0573     | -0.47      | 0.0062              | 0.0315     | -0.67  | 0.3137              | 0.4113     | -0.10  | 0.0855              | 0.2127     | -0.57  | 0.0357              | 0.1562     | 1.82   | 0.0551              | 0.1052     | 1.87   | 0.0074              | 0.0782     | 2.80   |
| 4116 Serine/threonine-protein kinase RIO1                                              | Q9BR52  | 0.0777              | 0.1907     | -0.79  | 0.1812              | 0.6647     | -1.22  | 0.5334              | 0.7543     | -0.23      | 0.2723              | 0.4291     | -0.36  | 0.5898              | 0.6668     | 0.16   | 0.3703              | 0.5781     | -0.25  | 0.3736              | 0.4718     | -2.55  | 0.8708              | 0.9814     | -0.33  | 0.0651              | 0.1285     | 2.06   |
| 4117 Serine/threonine-protein kinase RIO2                                              | Q9BV54  | 0.0887              | 0.2076     | -0.31  | 0.7831              | 0.8437     | -0.04  | 0.0883              | 0.1862     | -0.34      | 0.1041              | 0.1996     | -0.30  | 0.4101              | 0.5055     | -0.12  | 0.0572              | 0.1643     | -0.49  | 0.3736              | 0.5571     | -2.55  | 0.8708              | 1.1368     | -0.33  | 0.0651              | 0.1689     | 2.06   |
| 4118 Serine/threonine-protein kinase SIK3                                              | Q9Y2K2  | 0.4108              | 0.5140     | -3.31  | 0.5752              | 0.7197     | -1.75  | 0.5661              | 0.6538     | -1.19      | 0.5388              | 0.6186     | 0.89   | 0.2938              | 0.4145     | -1.88  | 0.9510              | 1.0011     | 0.09   | 0.0268              | 0.1418     | 0.99   | 0.7102              | 1.1547     | -0.13  | 0.0972              | 0.1523     | 0.59   |
| 4119 Serine/threonine-protein kinase SMG1                                              | Q96015  | 0.0006              | 0.0190     | 0.44   | 0.0003              | 0.2590     | 0.23   | 0.0003              | 0.0235     | 0.25       | 0.0005              | 0.0136     | 0.23   | 0.0217              | 0.1060     | 0.17   | 0.0008              | 0.0436     | 0.27   | 0.0103              | 0.1022     | 0.39   | 0.1668              | 0.4456     | 0.11   | 0.0953              | 0.1499     | -0.05  |
| 4120 Serine/threonine-protein kinase TA01                                              | Q7L7X3  | 0.9081              | 0.9285     | 0.02   | 0.1252              | 0.6421     | 0.65   | 0.8154              | 0.8504     | -0.05      | 0.0403              | 0.0990     | 0.18   | 0.1563              | 0.3375     | 0.15   | 0.0091              | 0.0687     | -0.54  | 0.3736              | 0.6161     | -2.55  | 0.8708              | 1.2409     | -0.33  | 0.0651              | 0.2027     | 2.06   |
| 4121 Serine/threonine-protein kinase TBK1                                              | Q9UHD2  | 0.4108              | 0.5139     | -3.31  | 0.5752              | 0.7195     | -1.75  | 0.5661              | 0.6537     | -1.19      | 0.5388              | 0.6184     | 0.89   | 0.2938              | 0.4143     | -1.88  | 0.9510              | 1.0008     | 0.09   | 0.0721              | 0.2127     | 0.35   | 0.0707              | 0.2572     | 0.14   | 0.2728              | 0.3447     | 0.04   |
| 4122 Serine/threonine-protein kinase tousel-like 1                                     | Q9UKH8  | 0.4294              | 0.5068     | -0.11  | 0.6756              | 0.7626     | 0.19   | 0.9661              | 0.9725     | -0.01      | 0.0106              | 0.0411     | 0.70   | 0.2059              | 0.4077     | 0.21   | 0.5642              | 0.7989     | -0.35  | 0.9002              | 0.9183     | 0.01   | 0.0149              | 0.1029     | 0.40   | 0.0810              | 0.1321     | 0.23   |
| 4123 Serine/threonine-protein kinase tousel-like 2                                     | Q86UE8  | 0.0500              | 0.1440     | -0.40  | 0.2413              | 0.6603     | -0.46  | 0.2412              | 0.4051     | -0.18      | 0.1027              | 0.1978     | -0.29  | 0.1654              | 0.3510     | -0.22  | 0.6313              | 0.8674     | -0.06  | 0.0022              | 0.0556     | -1.06  | 0.0013              | 0.0303     | -0.76  | 0.0000              | 0.0000     | -1.27  |
| 4124 Serine/threonine-protein kinase ULK3                                              | Q6PHR2  | 0.0027              | 0.0349     | 1.44   | 0.2848              | 0.6648     | 0.67   | 0.0039              | 0.0316     | 2.17       | 0.0035              | 0.0239     | 1.45   | 0.5549              | 0.6383     | -0.12  | 0.0026              | 0.0547     | 1.79   | 0.3736              | 0.6414     | -2.55  | 0.8708              | 1.2847     | -0.33  | 0.0651              | 0.2190     | -0.26  |
| 4125 Serine/threonine-protein kinase WNK1                                              | Q9H4A3  | 0.0226              | 0.0895     | 0.19   | 0.0332              | 0.5259     | 0.22   | 0.0123              | 0.0521     | 0.42       | 0.1235              | 0.2271     | 0.08   | 0.7681              | 0.8195     | 0.01   | 0.0063              | 0.0622     | 0.28   | 0.0113              | 0.1038     | -0.40  | 0.0123              | 0.0925     | -0.45  | 0.0015              | 0.0471     | -0.59  |
| 4126 Serine/threonine-protein kinase WNK2                                              | Q9Y3S1  | 0.9793              | 0.9863     | -0.01  | 0.6137              | 0.7145     | -0.25  | 0.3717              | 0.5696     | 0.22       | 0.2536              | 0.4035     | 0.30   | 0.2333              | 0.4441     | 0.32   | 0.3573              | 0.5632     | 0.23   | 0.5716              | 0.6215     | -0.09  | 0.0383              | 0.1783     | -0.19  | 0.1189              | 0.1771     | 0.16   |
| 4127 Serine/threonine-protein kinase WNK3                                              | Q9BY77  | 0.2356              | 0.4187     | 0.07   | 0.2825              | 0.6646     | -0.12  | 0.2248              | 0.3827     | -0.08      | 0.0909              | 0.1803     | -0.13  | 0.0329              | 0.1324     | -0.19  | 0.0305              | 0.1120     | 0.25   | 0.3320              | 0.6011     | 0.18   | 0.3792              | 0.7555     | 0.13   | 0.8448              | 0.8749     | -0.03  |
| 4128 Serine/threonine-protein kinase/endoribonuclease IRE2                             | Q76MU5  | 0.0149              | 0.0707     | -0.12  | 0.0176              | 0.4675     | -0.24  | 0.1694              | 0.3090     | -0.12      | 0.0657              | 0.1413     | -0.26  | 0.0017              | 0.0319     | -0.33  | 0.0405              | 0.1323     | -0.09  | 0.3736              | 0.5697     | -2.55  | 0.8708              | 1.1593     | -0.33  | 0.0651              | 0.1756     | 2.06   |
| 4129 Serine/threonine-protein phosphatase 1 regulatory subunit 10                      | Q96QC0  | 0.0150              | 0.0709     | -0.11  | 0.3117              | 0.6798     | -0.26  | 0.8306              | 0.8636     | -0.02      | 0.0819              | 0.1668     | -0.09  | 0.0012              | 0.0270     | -0.19  | 0.0150              | 0.0816     | 0.30   | 0.2716              | 0.5148     | -0.09  | 0.1265              | 0.3715     | 0.25   | 0.2299              | 0.3003     | -0.12  |
| 4130 Serine/threonine-protein phosphatase 2A 55 kDa regulatory subunit B alpha isoform | P63151  | 0.0297              | 0.1054     | 0.14   | 0.5023              | 0.8239     | 0.06   | 0.0677              | 0.1533     | 0.16       | 0.0257              | 0.0719     | 0.16   | 0.0053              | 0.0541     | 0.28   | td                  |            |        |                     |            |        |                     |            |        |                     |            |        |

Supplementary Table S2. Overview on all relatively quantified 5180 proteins statistical analysis

|      | Protein name                                                       | UniProt | MCF-7               |                     |                     |                     | MDA-MB-231          |                     |                     |                     |
|------|--------------------------------------------------------------------|---------|---------------------|---------------------|---------------------|---------------------|---------------------|---------------------|---------------------|---------------------|
|      |                                                                    |         | Dai SC20 vs control | Gen SC20 vs control | SSE SC20 vs control | Dai IC20 vs control | Gen IC20 vs control | SSE IC20 vs control | Dai IC20 vs control | Gen IC20 vs control |
|      |                                                                    |         | p value             | BH q value          | log2FC              | p value             | BH q value          | log2FC              | p value             | BH q value          |
| 4150 | Serine/threonine-protein phosphatase 5                             | P53041  | 0.0111              | 0.0603              | -0.22               | 0.1728              | 0.6601              | -0.23               | 0.1752              | 0.3172              |
| 4151 | Serine/threonine-protein phosphatase 6 catalytic subunit           | O00743  | 0.0074              | 0.0506              | 0.17                | 0.2324              | 0.6625              | 0.15                | 0.0285              | 0.0857              |
| 4152 | Serine/threonine-protein phosphatase 6 regulatory subunit 2        | O75170  | 0.1812              | 0.3450              | -0.22               | 0.0789              | 0.6146              | 0.08                | 0.3839              | 0.5845              |
| 4153 | Serine/threonine-protein phosphatase 6 regulatory subunit 3        | Q5H9R7  | 0.0117              | 0.0624              | 0.10                | 0.1605              | 0.6640              | 0.13                | 0.0244              | 0.0772              |
| 4154 | Serine/threonine-protein phosphatase PGAM5_mitochondrial           | Q96HS1  | 0.0074              | 0.0505              | 0.18                | 0.4967              | 0.8189              | 0.09                | 0.0190              | 0.0660              |
| 4155 | Serine/threonine-protein phosphatase PP1-alpha catalytic subunit   | P62136  | 0.4923              | 0.5664              | 0.05                | 0.5484              | 0.8640              | 0.10                | 0.6889              | 0.7378              |
| 4156 | Serine/threonine-protein phosphatase PP1-beta catalytic subunit    | P62140  | 0.0223              | 0.0889              | -0.19               | 0.2790              | 0.6648              | -0.15               | 0.0116              | 0.0503              |
| 4157 | Serine/threonine-protein phosphatase PP1-gamma catalytic subunit   | P36873  | 0.1634              | 0.3200              | 0.09                | 0.2611              | 0.6643              | 0.17                | 0.2193              | 0.3759              |
| 4158 | Serine-protein kinase ATM                                          | Q13315  | 0.4108              | 0.5135              | -3.31               | 0.5752              | 0.7190              | -1.75               | 0.5661              | 0.6532              |
| 4159 | Serine-threonine kinase receptor-associated protein                | Q9Y3F4  | 0.0021              | 0.0314              | 0.34                | 0.3595              | 0.7086              | 0.12                | 0.0031              | 0.0298              |
| 4160 | Serine-IRNA ligase cytoplasmic                                     | P40591  | 0.0016              | 0.0270              | 0.40                | 0.0849              | 0.6212              | 0.27                | 0.0008              | 0.0218              |
| 4161 | Serine-IRNA ligase mitochondrial                                   | Q9N181  | 0.1174              | 0.2520              | -0.11               | 0.9028              | 0.9318              | -0.02               | 0.2496              | 0.1615              |
| 4162 | Serologically defined colon cancer antigen 8                       | Q86S07  | 0.0216              | 0.0875              | 0.51                | 0.0004              | 0.2302              | 0.28                | 0.5584              | 0.7824              |
| 4163 | Serotransferrin                                                    | P02787  | 0.0078              | 0.0521              | -0.24               | 0.4568              | 0.7887              | -0.07               | 0.3019              | 0.4848              |
| 4164 | Serin B4                                                           | P48594  | 0.4108              | 0.5134              | -3.31               | 0.5752              | 0.7188              | -1.75               | 0.5661              | 0.6531              |
| 4165 | Serin B6                                                           | P35237  | 0.8918              | 0.9151              | 0.00                | 0.8353              | 0.8811              | 0.02                | 0.0242              | 0.0767              |
| 4166 | Serin B7                                                           | O75635  | 0.4108              | 0.5133              | -3.31               | 0.5752              | 0.7187              | -1.75               | 0.5661              | 0.6529              |
| 4167 | Serin B8                                                           | P50452  | 0.6086              | 0.6730              | 0.02                | 0.1740              | 0.6613              | 0.10                | 0.9865              | 0.9886              |
| 4168 | Serin H1                                                           | P50454  | 0.0343              | 0.1161              | 0.09                | 0.2750              | 0.6650              | 0.18                | 0.0063              | 0.0383              |
| 4169 | Serrate RNA effector molecule homolog                              | Q9BXPS  | 0.0194              | 0.0818              | 0.17                | 0.1762              | 0.6614              | 0.26                | 0.0138              | 0.0552              |
| 4170 | Serum albumin                                                      | P02768  | 0.0992              | 0.2239              | 0.15                | 0.6912              | 0.7736              | 0.08                | 0.0147              | 0.0570              |
| 4171 | S-formylglutathione hydrolase                                      | P10768  | 0.0047              | 0.0430              | 0.15                | 0.0880              | 0.6210              | 0.21                | 0.0184              | 0.0650              |
| 4172 | SH2 domain-containing protein 3C                                   | Q8NSH7  | 0.4108              | 0.5131              | -3.31               | 0.5752              | 0.7185              | -1.75               | 0.5661              | 0.6528              |
| 4173 | SH2 domain-containing protein 4A                                   | Q9H788  | 0.0001              | 0.0094              | -0.86               | 0.7929              | 0.8509              | -0.02               | 0.0027              | 0.0284              |
| 4174 | SH2 domain-containing protein 4B                                   | Q5SQS7  | 0.7040              | 0.7566              | -0.06               | 0.0301              | 0.5046              | -0.83               | 0.0784              | 0.1699              |
| 4175 | SH3 and cysteine-rich domain-containing protein                    | Q99469  | 0.7456              | 0.7931              | 0.03                | 0.8592              | 0.8982              | -0.02               | 0.4862              | 0.7065              |
| 4176 | SH3 and PX domain-containing protein 2B                            | A1X283  | 0.4108              | 0.5130              | -3.31               | 0.5752              | 0.7183              | -1.75               | 0.5661              | 0.6527              |
| 4177 | SH3 domain-binding glutamic acid-rich-like protein                 | O75368  | 0.1600              | 0.3149              | -0.06               | 0.7178              | 0.7930              | 0.04                | 0.3389              | 0.1044              |
| 4178 | SH3 domain-binding glutamic acid-rich-like protein 3               | Q9H289  | 0.0063              | 0.0476              | 0.08                | 0.0458              | 0.5609              | 0.34                | 0.0011              | 0.0227              |
| 4179 | SH3 domain-binding kinase-binding protein 1                        | Q96B97  | 0.4108              | 0.5129              | -3.31               | 0.5752              | 0.7181              | -1.75               | 0.5661              | 0.6525              |
| 4180 | SHC SH2 domain-binding protein 1                                   | Q8NEM2  | 0.6290              | 0.6913              | 0.03                | 0.1441              | 0.6542              | -0.20               | 0.1851              | 0.6726              |
| 4181 | SHC-transforming protein 1                                         | P29353  | 0.5771              | 0.6445              | -0.40               | 0.1817              | 0.6647              | -0.30               | 0.8746              | 0.9009              |
| 4182 | Shoon-1                                                            | A0M266  | 0.4785              | 0.5534              | 0.03                | 0.1644              | 0.6617              | 0.24                | 0.0070              | 0.0399              |
| 4183 | Short stature homeobox protein 2                                   | O60902  | 0.4108              | 0.5128              | -3.31               | 0.5752              | 0.7180              | -1.75               | 0.5661              | 0.6524              |
| 4184 | Short/branched chain specific acyl-CoA dehydrogenase_mitochondrial | P45954  | 0.4108              | 0.5126              | -3.31               | 0.5752              | 0.7178              | -1.75               | 0.5661              | 0.6522              |
| 4185 | Short-wave-sensitive opsin 1                                       | P03999  | 0.4108              | 0.5125              | -3.31               | 0.5752              | 0.7176              | -1.75               | 0.5661              | 0.6521              |
| 4186 | Shuoshin 2                                                         | Q562F6  | 0.4108              | 0.5124              | -3.31               | 0.5752              | 0.7174              | -1.75               | 0.5661              | 0.6519              |
| 4187 | Sialic acid synthase                                               | Q9NR45  | 0.0229              | 0.0903              | 0.23                | 0.2068              | 0.6596              | 0.26                | 0.0008              | 0.0208              |
| 4188 | Sialidase-1                                                        | Q99519  | 0.0021              | 0.0313              | 0.66                | 0.3298              | 0.6889              | -0.10               | 0.3511              | 0.5452              |
| 4189 | Sideroflexin-1                                                     | Q9H9B4  | 0.0627              | 0.1658              | 0.18                | 0.2340              | 0.6613              | 0.22                | 0.0533              | 0.1307              |
| 4190 | Sideroflexin-2                                                     | Q96NB2  | 0.0038              | 0.0391              | -0.18               | 0.2466              | 0.7625              | -0.10               | 0.5388              | 0.7607              |
| 4191 | Sideroflexin-3                                                     | Q9BWM7  | 0.0148              | 0.0707              | -0.62               | 0.5070              | 0.8287              | -0.33               | 0.0204              | 0.0687              |
| 4192 | Signal peptidase complex catalytic subunit SEC11A                  | P67812  | 0.8961              | 0.9183              | -0.01               | 0.2710              | 0.6644              | -0.13               | 0.1036              | 0.2100              |
| 4193 | Signal peptidase complex subunit 1                                 | Q9Y6A9  | 0.0908              | 0.2108              | 0.11                | 0.4036              | 0.7477              | 0.15                | 0.0536              | 0.1312              |
| 4194 | Signal peptidase complex subunit 2                                 | P15005  | 0.0002              | 0.0120              | 0.22                | 0.1998              | 0.6639              | 0.06                | 0.0672              | 0.1525              |
| 4195 | Signal peptidase complex subunit 3                                 | P61009  | 0.0593              | 0.1608              | -0.05               | 0.2950              | 0.6720              | -0.11               | 0.0042              | 0.0321              |
| 4196 | Signal peptidase complex-like 2A                                   | Q8TCT8  | 0.0353              | 0.1172              | -1.88               | 0.0975              | 0.6290              | -7.47               | 0.3237              | 0.5115              |
| 4197 | Signal recognition particle 14 kDa protein                         | P37108  | 0.0020              | 0.0307              | 0.22                | 0.0279              | 0.5053              | 0.19                | 0.0004              | 0.0233              |
| 4198 | Signal recognition particle 19 kDa protein                         | P09132  | 0.2856              | 0.4813              | -0.08               | 0.4275              | 0.7628              | 0.08                | 0.0168              | 0.0614              |
| 4199 | Signal recognition particle 54 kDa protein                         | P61011  | 0.5724              | 0.6400              | 0.04                | 0.1824              | 0.6658              | 0.27                | 0.0645              | 0.1482              |
| 4200 | Signal recognition particle 9 kDa protein                          | P49458  | 0.0102              | 0.0588              | 0.23                | 0.0830              | 0.6195              | 0.24                | 0.0006              | 0.0203              |
| 4201 | Signal recognition particle receptor subunit alpha                 | P08240  | 0.0019              | 0.0298              | -0.30               | 0.6113              | 0.7127              | -0.10               | 0.2056              | 0.3394              |
| 4202 | Signal recognition particle receptor subunit beta                  | Q9Y5M8  | 0.0369              | 0.1209              | 0.20                | 0.3031              | 0.6765              | 0.19                | 0.0371              | 0.1010              |
| 4203 | Signal recognition particle subunit SRP68                          | Q9UHH9  | 0.6478              | 0.7091              | 0.02                | 0.2257              | 0.6602              | 0.19                | 0.0377              | 0.1021              |
| 4204 | Signal recognition particle subunit SRP72                          | O76094  | 0.1972              | 0.3664              | 0.07                | 0.2691              | 0.6625              | 0.19                | 0.0334              | 0.0542              |
| 4205 | Signal transducer and activator of transcription 1-alpha/beta      | P42224  | 0.0005              | 0.0177              | 0.12                | 0.1701              | 0.6620              | 0.15                | 0.0008              | 0.0214              |
| 4206 | Signal transducer and activator of transcription 3                 | P40763  | 0.0958              | 0.2185              | 0.10                | 0.0044              | 0.3506              | 0.29                | 0.0061              | 0.0381              |
| 4207 | Signal transducing adapter molecule 1                              | Q92783  | 0.0430              | 0.1317              | -0.53               | 0.5064              | 0.8283              | -0.13               | 0.1380              | 0.2620              |
| 4208 | Signal transducing adapter molecule 2                              | O75886  | 0.3123              | 0.5132              | -0.31               | 0.0243              | 0.4804              | -0.36               | 0.0971              | 0.1998              |
| 4209 | Signal-induced proliferation-associated 1-like protein 2           | Q9P287  | 0.5149              | 0.5874              | -0.06               | 0.9163              | 0.9418              | 0.02                | 0.3155              | 0.5022              |
| 4210 | Signal-induced proliferation-associated 1-like protein 3           | O60292  | 0.4551              | 0.5323              | -0.09               | 0.3461              | 0.7028              | 0.19                | 0.6672              | 0.7181              |
| 4211 | Signaling lymphocytic activation molecule                          | Q13291  | 0.4108              | 0.5123              | -3.31               | 0.5752              | 0.7173              | -1.75               | 0.5661              | 0.6518              |
| 4212 | Single-stranded DNA-binding protein 2                              | P81877  | 0.0040              | 0.0400              | -1.31               | 0.8342              | 0.8806              | -0.04               | 0.1540              | 0.2853              |
| 4213 | Single-stranded DNA-binding protein mitochondrial                  | Q04837  | 0.0099              | 0.0579              | 0.26                | 0.1704              | 0.6612              | 0.25                | 0.0051              | 0.0349              |
| 4214 | Sister chromatid cohesion protein PDS5 homolog A                   | Q29RF7  | 0.0660              | 0.1703              | 0.05                | 0.1328              | 0.6471              | 0.24                | 0.3549              | 0.5504              |
| 4215 | Sjogrens syndrome/scleroderma autoantigen 1                        | O60232  | 0.0089              | 0.0559              | 0.29                | 0.2375              | 0.6614              | -0.13               | 0.0762              | 0.0429              |
| 4216 | SKI-like protein                                                   | P12757  | 0.0295              | 0.1051              | 0.09                | 0.8459              | 0.8892              | 0.03                | 0.0275              | 0.0834              |
| 4217 | SLAN motif-containing protein 2                                    | Q9P270  | 0.2655              | 0.4572              | -0.12               | 0.2886              | 0.6616              | 0.14                | 0.2116              | 0.3662              |
| 4218 | SLIT homolog 2 protein                                             | O94813  | 0.4108              | 0.5121              | -3.31               | 0.5752              | 0.7171              | -1.75               | 0.5661              | 0.6516              |
| 4219 | SLIT-ROBO Rho GTPase-activating protein 1                          | Q7Z6B7  | 0.4108              | 0.5120              | -3.31               | 0.5752              | 0.7169              | -1.75               | 0.5661              | 0.6515              |
| 4220 | SLIT-ROBO Rho GTPase-activating protein 2                          | O75044  | 0.4108              | 0.5119              | -3.31               | 0.5752              | 0.7168              | -1.75               | 0.5661              | 0.6514              |
| 4221 | Small acid protein                                                 | O00193  | 0.0392              | 0.1246              | -0.06               | 0.0014              | 0.2014              | -0.10               | 0.0015              | 0.0235              |
| 4222 | Small EDRK-rich factor 2                                           | P84101  | 0.1121              | 0.2435              | -0.22               | 0.1743              | 0.6605              | -0.62               | 0.1337              | 0.2560              |



Supplementary Table S2. Overview on all relatively quantified 5180 proteins statistical analysis

|      | Protein name                                                           | UniProt | MCF-7               |                     |                     |                     | MDA-MB-231          |                     |                     |                     |
|------|------------------------------------------------------------------------|---------|---------------------|---------------------|---------------------|---------------------|---------------------|---------------------|---------------------|---------------------|
|      |                                                                        |         | Dai SC20 vs control | Gen SC20 vs control | SSE SC20 vs control | Dai IC20 vs control | Gen IC20 vs control | SSE IC20 vs control | Dai IC20 vs control | Gen IC20 vs control |
|      |                                                                        |         | p value             | BH q value          | log2FC              | p value             | BH q value          | log2FC              | p value             | BH q value          |
| 4223 | Small G-protein signaling modulator 3                                  | Q96HU1  | 0.2999              | 0.4989              | -0.06               | 0.7359              | 0.8080              | 0.03                | 0.0663              | 0.1510              |
| 4224 | Small glutamine-rich tetratricopeptide repeat-containing protein alpha | O43765  | 0.4108              | 0.5118              | -3.31               | 0.5752              | 0.7166              | -1.75               | 0.5661              | 0.6512              |
| 4225 | Small glutamine-rich tetratricopeptide repeat-containing protein beta  | Q96EQ0  | 0.4108              | 0.5116              | -3.31               | 0.5752              | 0.7164              | -1.75               | 0.5661              | 0.6511              |
| 4226 | Small nuclear ribonucleoprotein F                                      | P62306  | 0.8881              | 0.8887              | -0.05               | 0.1992              | 0.6640              | -0.41               | 0.2745              | 0.4484              |
| 4227 | Small nuclear ribonucleoprotein Sm D1                                  | P62314  | 0.8896              | 0.8880              | 0.01                | 0.1430              | 0.6544              | -0.12               | 0.0237              | 0.0756              |
| 4228 | Small nuclear ribonucleoprotein Sm D2                                  | P62316  | 0.4616              | 0.5384              | -0.03               | 0.4727              | 0.8015              | -0.13               | 0.0044              | 0.0327              |
| 4229 | Small nuclear ribonucleoprotein Sm D3                                  | P62318  | 0.0449              | 0.1351              | 0.08                | 0.8214              | 0.8724              | -0.02               | 0.0018              | 0.0235              |
| 4230 | Small nuclear ribonucleoprotein-associated proteins B and B'           | P14678  | 0.4108              | 0.5115              | -3.31               | 0.5752              | 0.7162              | -1.75               | 0.5661              | 0.6509              |
| 4231 | Small proline-rich protein 2A                                          | P35322  | 0.4108              | 0.5114              | -3.31               | 0.5752              | 0.7161              | -1.75               | 0.5661              | 0.6508              |
| 4232 | Small subunit processome component 20 homolog                          | O75691  | 0.0430              | 0.1316              | 0.12                | 0.0110              | 0.4317              | 0.25                | 0.0111              | 0.0489              |
| 4233 | Small ubiquitin-related modifier 1                                     | P63165  | 0.4108              | 0.5113              | -3.31               | 0.5752              | 0.7159              | -1.75               | 0.5661              | 0.6506              |
| 4234 | Small ubiquitin-related modifier 2                                     | P61956  | 0.0140              | 0.0691              | 0.25                | 0.1985              | 0.6655              | 0.34                | 0.0061              | 0.0379              |
| 4235 | Small ubiquitin-related modifier 3                                     | P55854  | 0.4108              | 0.5112              | -3.31               | 0.5752              | 0.7157              | -1.75               | 0.5661              | 0.6505              |
| 4236 | S-methyl-5'-thioadenosine phosphorylase                                | Q13126  | 0.4108              | 0.5110              | -3.31               | 0.5752              | 0.7155              | -1.75               | 0.5661              | 0.6503              |
| 4237 | snRNA-activating protein complex subunit 3                             | O29266  | 0.4108              | 0.5109              | -3.31               | 0.5752              | 0.7154              | -1.75               | 0.5661              | 0.6502              |
| 4238 | Snurportin-1                                                           | O95149  | 0.0100              | 0.0582              | 11.31               | 0.5752              | 0.8860              | -1.75               | 0.5661              | 0.7898              |
| 4239 | SNW domain-containing protein 1                                        | Q13573  | 0.2058              | 0.3784              | -0.04               | 0.1105              | 0.6325              | 0.07                | 0.7367              | 0.7798              |
| 4240 | Sodium channel protein type 5 subunit alpha                            | Q14524  | 0.4108              | 0.5108              | -3.31               | 0.5752              | 0.7152              | -1.75               | 0.5661              | 0.6501              |
| 4241 | Sodium/potassium-transporting ATPase subunit alpha-1                   | P05023  | 0.0447              | 0.1346              | 0.17                | 0.3459              | 0.7029              | 0.18                | 0.0136              | 0.0456              |
| 4242 | Sodium/potassium-transporting ATPase subunit alpha-2                   | P50993  | 0.0015              | 0.0259              | 0.28                | 0.0881              | 0.6209              | 0.32                | 0.0035              | 0.0315              |
| 4243 | Sodium/potassium-transporting ATPase subunit alpha-3                   | P13637  | 0.0049              | 0.0430              | 0.30                | 0.4709              | 0.8003              | -0.13               | 0.3915              | 0.5933              |
| 4244 | Sodium/potassium-transporting ATPase subunit alpha-4                   | Q13733  | 0.0934              | 0.2149              | 0.14                | 0.2434              | 0.6587              | 0.10                | 0.3345              | 0.5396              |
| 4245 | Sodium/potassium-transporting ATPase subunit beta-1                    | P05026  | 0.4090              | 0.6302              | -0.05               | 0.2276              | 0.6578              | 0.17                | 0.2230              | 0.3802              |
| 4246 | Sodium/potassium-transporting ATPase subunit beta-3                    | P54709  | 0.2976              | 0.4965              | 0.04                | 0.8798              | 0.9137              | 0.02                | 0.5006              | 0.7231              |
| 4247 | Sodium-coupled neutral amino acid transporter 2                        | Q96QD8  | 0.1787              | 0.3416              | -0.13               | 0.2076              | 0.6639              | -0.16               | 0.6148              | 0.6692              |
| 4248 | Soluble calcium-activated nucleoside 1                                 | Q8WVQ1  | 0.2499              | 0.4360              | 0.15                | 0.1904              | 0.6691              | 0.16                | 0.0295              | 0.0872              |
| 4249 | Solute carrier family 12 member 1                                      | Q13621  | 0.4108              | 0.5107              | -3.31               | 0.5752              | 0.7150              | -1.75               | 0.5661              | 0.6499              |
| 4250 | Solute carrier family 12 member 7                                      | Q9Y666  | 0.4108              | 0.5105              | -3.31               | 0.5752              | 0.7149              | -1.75               | 0.5661              | 0.6498              |
| 4251 | Solute carrier family 12 member 8                                      | AOAV02  | 0.4108              | 0.5104              | -3.31               | 0.5752              | 0.7147              | -1.75               | 0.5661              | 0.6496              |
| 4252 | Solute carrier family 2, facilitated glucose transporter member 1      | P11166  | 0.0017              | 0.0280              | 0.33                | 0.4560              | 0.7881              | 0.08                | 0.0007              | 0.0201              |
| 4253 | Solute carrier family 2, facilitated glucose transporter member 3      | P11169  | 0.0370              | 0.1210              | -0.33               | 0.4939              | 0.8169              | -0.08               | 0.9496              | 0.9602              |
| 4254 | Solute carrier family 27 member 3                                      | Q5K4L6  | 0.0023              | 0.0327              | -0.30               | 0.1335              | 0.6481              | -0.15               | 0.0093              | 0.0451              |
| 4255 | Sorbin and SH3 domain-containing protein 2                             | O94875  | 0.0878              | 0.2063              | 0.09                | 0.0425              | 0.5674              | 0.12                | 0.0818              | 0.1757              |
| 4256 | Sorbitol dehydrogenase                                                 | Q00796  | 0.0570              | 0.1566              | 0.07                | 0.2483              | 0.6582              | 0.11                | 0.0013              | 0.0226              |
| 4257 | Sorcin                                                                 | P30626  | 0.0161              | 0.0740              | 0.36                | 0.4865              | 0.8108              | 0.07                | 0.3757              | 0.5749              |
| 4258 | Soritin                                                                | O99523  | 0.3170              | 0.5198              | 0.05                | 0.1033              | 0.4416              | 0.23                | 0.0525              | 0.1296              |
| 4259 | Sorting and assembly machinery component 50 homolog                    | Q9Y512  | 0.4108              | 0.5103              | -3.31               | 0.5752              | 0.7145              | -1.75               | 0.5661              | 0.6495              |
| 4260 | Sorting nexin-1                                                        | Q13596  | 0.4214              | 0.4989              | 0.05                | 0.2143              | 0.6615              | 0.22                | 0.0076              | 0.0414              |
| 4261 | Sorting nexin-12                                                       | Q9UMY4  | 0.2319              | 0.4138              | -0.11               | 0.1273              | 0.6415              | -0.26               | 0.2570              | 0.4255              |
| 4262 | Sorting nexin-13                                                       | Q9YSW8  | 0.0450              | 0.1352              | 0.21                | 0.1567              | 0.6621              | 0.27                | 0.0196              | 0.0674              |
| 4263 | Sorting nexin-2                                                        | O60749  | 0.0187              | 0.0803              | 0.14                | 0.1721              | 0.6618              | 0.34                | 0.0098              | 0.0461              |
| 4264 | Sorting nexin-27                                                       | Q96L92  | 0.0219              | 0.0880              | 0.18                | 0.3928              | 0.7372              | 0.17                | 0.0352              | 0.0977              |
| 4265 | Sorting nexin-3                                                        | O60493  | 0.7096              | 0.7615              | -0.01               | 0.0895              | 0.6248              | -0.08               | 0.3015              | 0.4843              |
| 4266 | Sorting nexin-32                                                       | Q86XE0  | 0.4108              | 0.5102              | -3.31               | 0.5752              | 0.7143              | -1.75               | 0.5661              | 0.6493              |
| 4267 | Sorting nexin-4                                                        | O95219  | 0.2897              | 0.4864              | -0.09               | 0.2613              | 0.6641              | 0.18                | 0.0529              | 0.1302              |
| 4268 | Sorting nexin-5                                                        | Q9Y5X3  | 0.0025              | 0.0333              | 0.45                | 0.3578              | 0.7079              | 0.03                | 0.0446              | 0.1155              |
| 4269 | Sorting nexin-6                                                        | Q9UNH7  | 0.1020              | 0.2281              | 0.07                | 0.4080              | 0.7494              | 0.13                | 0.0333              | 0.0943              |
| 4270 | Sorting nexin-7                                                        | Q9UNH6  | 0.0096              | 0.0373              | 0.23                | 0.1886              | 0.6691              | 0.25                | 0.0540              | 0.1319              |
| 4271 | Sorting nexin-8                                                        | Q9YSX2  | 0.5391              | 0.6096              | -0.05               | 0.0441              | 0.5683              | 0.21                | 0.1116              | 0.2231              |
| 4272 | Sorting nexin-9                                                        | Q9YSX1  | 0.4108              | 0.5101              | -3.31               | 0.5752              | 0.7142              | -1.75               | 0.5661              | 0.6492              |
| 4273 | SPATS2-like protein                                                    | Q9NUQ6  | 0.4126              | 0.4905              | 0.03                | 0.0342              | 0.5288              | 0.34                | 0.0693              | 0.1561              |
| 4274 | Speckle-type P                                                         | Q6Q16   | 0.0012              | 0.0236              | 0.52                | 0.2504              | 0.6604              | 0.24                | 0.0054              | 0.0357              |
| 4275 | Spectrin alpha chain erythrocytic 1                                    | P02549  | 0.1388              | 0.2832              | -0.09               | 0.3036              | 0.6764              | 0.07                | 0.0068              | 0.0397              |
| 4276 | Spectrin alpha chain non-erythrocytic 1                                | Q13813  | 0.0021              | 0.0313              | 0.26                | 0.1675              | 0.6613              | 0.24                | 0.0025              | 0.0276              |
| 4277 | Spectrin beta chain non-erythrocytic 1                                 | Q01082  | 0.0366              | 0.1203              | 0.10                | 0.1301              | 0.6455              | 0.11                | 0.0028              | 0.0292              |
| 4278 | Spectrin beta chain non-erythrocytic 2                                 | O15020  | 0.0050              | 0.0432              | 0.37                | 0.3807              | 0.7274              | 0.19                | 0.0193              | 0.0667              |
| 4279 | Spectrin beta chain non-erythrocytic 4                                 | Q9H254  | 0.0162              | 0.0741              | -0.14               | 0.3560              | 0.7076              | -0.08               | 0.0425              | 0.1119              |
| 4280 | Spectrin beta chain non-erythrocytic 5                                 | Q9NR65  | 0.3713              | 0.5858              | 0.05                | 0.0771              | 0.6107              | 0.39                | 0.0078              | 0.0418              |
| 4281 | Speedy protein E1                                                      | Q8NFV5  | 0.1317              | 0.2735              | -2.04               | 0.6906              | 0.7735              | 0.09                | 0.2170              | 0.3727              |
| 4282 | Speedy protein E5                                                      | A6N1Y4  | 0.0347              | 0.1165              | -1.80               | 0.3158              | 0.6808              | -1.17               | 0.1013              | 0.0492              |
| 4283 | Sperm flagellar protein 2                                              | Q8C093  | 0.4108              | 0.5099              | -3.31               | 0.5752              | 0.7140              | -1.75               | 0.5661              | 0.6490              |
| 4284 | Sperm-associated antigen 5                                             | Q96R06  | 0.0991              | 0.2238              | -0.30               | 0.0568              | 0.5861              | -0.46               | 0.0674              | 0.1529              |
| 4285 | Spermatid-perinuclear RNA-binding protein                              | Q96B39  | 0.0054              | 0.0443              | 0.17                | 0.7556              | 0.8224              | 0.02                | 0.0464              | 0.1192              |
| 4286 | Spermatid-specific manchette-related protein 1                         | Q8NCRC  | 0.4108              | 0.5098              | -3.31               | 0.5752              | 0.7138              | -1.75               | 0.5661              | 0.6489              |
| 4287 | Spermatogenesis-associated protein 13                                  | Q96N96  | 0.0432              | 0.1319              | -0.27               | 0.4759              | 0.8027              | -0.82               | 0.1193              | 0.2356              |
| 4288 | Spermatogenesis-associated protein 17                                  | Q96L03  | 0.0053              | 0.0443              | 0.22                | 0.5340              | 0.8501              | -0.31               | 0.0000              | 0.0000              |
| 4289 | Spermatogenesis-associated protein 5-like protein 1                    | Q9BVD7  | 0.0030              | 0.0361              | -0.82               | 0.1803              | 0.6652              | -0.48               | 0.0117              | 0.0507              |
| 4290 | Spermatogenesis-associated protein 8                                   | Q6RV06  | 0.4108              | 0.5097              | -3.31               | 0.5752              | 0.7137              | -1.75               | 0.5661              | 0.6488              |
| 4291 | Spermatogenesis-associated serine-rich protein 2                       | Q86XZ4  | 0.5463              | 0.6157              | 0.04                | 0.1250              | 0.6424              | 0.45                | 0.0063              | 0.0385              |
| 4292 | Spermatogenesis-defective protein 39 homolog                           | Q9H9C1  | 0.0542              | 0.1522              | -0.40               | 0.2050              | 0.4814              | -0.35               | 0.0464              | 0.7064              |
| 4293 | Spermatogenesis leucine zipper protein 1                               | Q9BXG8  | 0.4108              | 0.5096              | -3.31               | 0.5752              | 0.7135              | -1.75               | 0.5661              | 0.6486              |
| 4294 | Spermidine synthase                                                    | P19623  | 0.5466              | 0.6159              | 0.04                | 0.8236              | 0.8737              | 0.02                | 0.0266              | 0.0816              |
| 4295 | Spermine synthase                                                      | P52788  | 0.1812              | 0.3448              | 0.23                | 0.8662              | 0.9033              | 0.07                | 0.1230              | 0.2413              |
| 4296 | S-phase kinase-associated protein 1                                    | P63208  | 0.1972              | 0.3663              | 0.08                | 0.1466              | 0.6595              | 0.11                | 0.0601              | 0.1418              |
| 4297 | Sphingomyelin phosphodiesterase                                        | P17405  | 0.2924              | 0.4902              | 0.09                | 0.1615              | 0.6629              | -0.07               | 0.4552              | 0.6701              |
| 4298 | Sphingomyelin phosphodiesterase 3                                      | Q9NY59  | 0.0103              | 0.0588              | 0.30                | 0.1481              | 0.6579              | 0.26                | 0.2533              | 0.4209              |
| 4299 | Sphingomyelin phosphodiesterase 4                                      | Q9NXE4  | 0.4108              | 0.5094              | -3.31               | 0.5752              | 0.7133              | -1.75               | 0.5661              | 0.6485              |

Supplementary Table S2. Overview on all relatively quantified 5180 proteins statistical analysis

| Protein name                                                     | UniProt    | MCF-7               |                     |                     |                     | MDA-MB-231          |                     |                     |                     |            |        |        |       |        |        |       |        |        |       |        |        |       |        |        |       |        |        |       |
|------------------------------------------------------------------|------------|---------------------|---------------------|---------------------|---------------------|---------------------|---------------------|---------------------|---------------------|------------|--------|--------|-------|--------|--------|-------|--------|--------|-------|--------|--------|-------|--------|--------|-------|--------|--------|-------|
|                                                                  |            | Dai SC20 vs control | Gen SC20 vs control | SSE SC20 vs control | Dai IC20 vs control | Gen IC20 vs control | SSE IC20 vs control | Dai IC20 vs control | Gen IC20 vs control |            |        |        |       |        |        |       |        |        |       |        |        |       |        |        |       |        |        |       |
| p value                                                          | BH q value | log2FC              | p value             | BH q value          | log2FC              | p value             | BH q value          | log2FC              | p value             | BH q value | log2FC |        |       |        |        |       |        |        |       |        |        |       |        |        |       |        |        |       |
| 4300 Spliceosome-1-phosphate lyase 1                             | O95470     | 0.7446              | 0.7922              | 0.02                | 0.3234              | 0.6854              | 0.24                | 0.0347              | 0.0970              | 0.20       | 0.0309 | 0.0819 | 0.19  | 0.3347 | 0.4315 | 0.06  | 0.0522 | 0.1543 | 0.16  | 0.6397 | 0.6849 | 0.05  | 0.2274 | 0.5398 | 0.13  | 0.2937 | 0.3653 | 0.11  |
| 4301 Spindle assembly abnormal protein 6 homolog                 | Q6UJ00     | 0.4108              | 0.5093              | -3.31               | 0.5752              | 0.7131              | -1.75               | 0.5661              | 0.6483              | -1.19      | 0.5388 | 0.6134 | 0.89  | 0.2938 | 0.4102 | -1.88 | 0.9510 | 0.9934 | 0.09  | 0.0842 | 0.2316 | 0.49  | 0.2092 | 0.5112 | 0.26  | 0.8506 | 0.8791 | 0.06  |
| 4302 Spindlin-2A                                                 | Q99865     | 0.0980              | 0.2219              | -0.93               | 0.4415              | 0.7774              | -0.49               | 0.2955              | 0.4761              | -0.23      | 0.0422 | 0.1023 | -0.56 | 0.0322 | 0.1310 | -0.24 | 0.0672 | 0.1820 | -1.15 | 0.3736 | 0.5506 | -2.55 | 0.8708 | 1.1252 | -0.33 | 0.0651 | 0.1655 | 2.06  |
| 4303 Spliceosome RNA helicase DDX39B                             | Q13838     | 0.0036              | 0.0382              | 0.35                | 0.1130              | 0.6349              | 0.38                | 0.0169              | 0.0616              | 0.51       | 0.0007 | 0.0135 | 0.40  | 0.0150 | 0.0875 | 0.24  | 0.0007 | 0.0417 | 0.54  | 0.0376 | 0.1513 | 0.24  | 0.5553 | 0.9811 | 0.04  | 0.6977 | 0.7498 | 0.02  |
| 4304 Spliceosome-associated protein CWC27 homolog                | Q1U304     | 0.0419              | 0.1397              | -0.17               | 0.0161              | 0.4582              | -0.36               | 0.0415              | 0.1096              | 0.20       | 0.0212 | 0.0629 | -0.28 | 0.4068 | 0.5027 | -0.05 | 0.0448 | 0.1398 | 0.32  | 0.2689 | 0.5115 | 0.84  | 0.3734 | 0.7468 | 0.65  | 0.2318 | 0.3020 | 0.95  |
| 4305 Splicing factor 1                                           | Q15637     | 0.0089              | 0.0559              | 0.22                | 0.2276              | 0.6609              | 0.24                | 0.0081              | 0.0423              | 0.33       | 0.0068 | 0.0334 | 0.33  | 0.5968 | 0.6732 | -0.02 | 0.0265 | 0.1042 | 0.20  | 0.0406 | 0.1657 | 0.04  | 0.6636 | 1.1017 | 0.04  | 0.4200 | 0.4914 | 0.06  |
| 4306 Splicing factor 3A subunit 1                                | Q15459     | 0.0202              | 0.0838              | 0.21                | 0.0674              | 0.6717              | 0.26                | 0.0086              | 0.0205              | 0.52       | 0.0674 | 0.1436 | 0.22  | 0.7876 | 0.8331 | -0.01 | 0.0106 | 0.0701 | 0.29  | 0.1716 | 0.3688 | 0.15  | 0.1768 | 0.4616 | 0.12  | 0.0708 | 0.6340 | 0.04  |
| 4307 Splicing factor 3A subunit 2                                | Q15428     | 0.4108              | 0.5092              | -3.31               | 0.5752              | 0.7130              | -1.75               | 0.5661              | 0.6482              | -1.19      | 0.5388 | 0.6133 | 0.89  | 0.2938 | 0.4101 | -1.88 | 0.9510 | 0.9932 | 0.09  | 0.0610 | 0.1949 | 0.28  | 0.4870 | 0.8974 | 0.03  | 0.0889 | 0.1418 | 0.28  |
| 4308 Splicing factor 3A subunit 3                                | Q12874     | 0.0090              | 0.0563              | 0.32                | 0.1249              | 0.6425              | 0.29                | 0.0145              | 0.0567              | 0.25       | 0.0110 | 0.0421 | 0.29  | 0.3150 | 0.4123 | 0.06  | 0.0653 | 0.1782 | 0.28  | 0.1822 | 0.3833 | 0.14  | 0.0863 | 0.2910 | -0.20 | 0.0074 | 0.0779 | -0.33 |
| 4309 Splicing factor 3B subunit 1                                | O75533     | 0.0256              | 0.0967              | -0.09               | 0.8241              | 0.8737              | 0.02                | 0.0210              | 0.0701              | 0.13       | 0.6414 | 0.6863 | 0.02  | 0.0018 | 0.0328 | -0.26 | 0.3345 | 0.5378 | -0.03 | 0.2815 | 0.5306 | 0.12  | 0.1061 | 0.3301 | -0.19 | 0.3268 | 0.3979 | -0.10 |
| 4310 Splicing factor 3B subunit 2                                | Q13435     | 0.1406              | 0.2861              | 0.06                | 0.845               | 0.7304              | 0.17                | 0.0279              | 0.0843              | 0.18       | 0.0153 | 0.0510 | 0.18  | 0.1452 | 0.3198 | -0.15 | 0.3477 | 0.5528 | 0.06  | 0.0118 | 0.1036 | 0.29  | 0.4365 | 0.8371 | 0.06  | 0.0128 | 0.0984 | 0.30  |
| 4311 Splicing factor 3B subunit 3                                | Q15393     | 0.2111              | 0.3841              | 0.07                | 0.3069              | 0.6776              | 0.16                | 0.0097              | 0.0459              | 0.21       | 0.0109 | 0.0419 | 0.20  | 0.1702 | 0.3580 | -0.07 | 0.0954 | 0.2277 | 0.10  | 0.0118 | 0.1040 | 0.40  | 0.0412 | 0.1867 | 0.18  | 0.0303 | 0.1475 | 0.21  |
| 4312 Splicing factor 3B subunit 4                                | Q15427     | 0.0587              | 0.1600              | -0.12               | 0.6382              | 0.7335              | -0.06               | 0.0044              | 0.0327              | -0.18      | 0.0589 | 0.1299 | -0.08 | 0.0115 | 0.0769 | -0.13 | 0.0270 | 0.1052 | -0.19 | 0.0077 | 0.0900 | 0.59  | 0.8708 | 1.3101 | -0.33 | 0.0021 | 0.0506 | 7.39  |
| 4313 Splicing factor 3B subunit 5                                | Q9BWJ5     | 0.0094              | 0.0572              | 0.27                | 0.2326              | 0.6624              | 0.19                | 0.0310              | 0.0900              | 0.22       | 0.0107 | 0.0414 | 0.27  | 0.1577 | 0.3395 | 0.09  | 0.2700 | 0.4633 | 0.07  | 0.0437 | 0.1683 | -0.23 | 0.0122 | 0.0923 | -0.31 | 0.0130 | 0.0990 | -0.44 |
| 4314 Splicing factor 3B subunit 6                                | Q9Y3B4     | 0.0396              | 0.1255              | 0.14                | 0.4951              | 0.8173              | -0.03               | 0.0567              | 0.1361              | 0.08       | 0.8626 | 0.8818 | -0.02 | 0.0001 | 0.0076 | 0.20  | 0.8439 | 1.0791 | -0.02 | 0.0790 | 0.2231 | -0.22 | 0.0209 | 0.1250 | -0.29 | 0.0515 | 0.1989 | -0.17 |
| 4315 Splicing factor 45                                          | Q96125     | 0.0085              | 0.0546              | -0.33               | 0.8102              | 0.8635              | 0.03                | 0.0291              | 0.0865              | -0.37      | 0.0131 | 0.0464 | -0.33 | 0.1500 | 0.3273 | -0.10 | 0.3366 | 0.5405 | -0.28 | 0.3736 | 0.4756 | -2.55 | 0.8708 | 0.9885 | -0.33 | 0.0651 | 0.1301 | 2.06  |
| 4316 Splicing factor U2AF 26 kDa subunit                         | Q8WU68     | 0.1431              | 0.2898              | 0.12                | 0.6939              | 0.7745              | 0.04                | 0.2938              | 0.4743              | -0.06      | 0.5888 | 0.6375 | 0.03  | 0.5856 | 0.6632 | -0.03 | 0.5770 | 0.8115 | -0.03 | 0.0010 | 0.0421 | 0.43  | 0.0058 | 0.0613 | 0.17  | 0.0080 | 0.0800 | 0.29  |
| 4317 Splicing factor U2AF 35 kDa subunit-like protein            | P0DN76     | 0.7896              | 0.8296              | 0.02                | 0.8126              | 0.8656              | 0.02                | 0.0174              | 0.0628              | 0.23       | 0.2912 | 0.4533 | 0.07  | 0.2997 | 0.3979 | -0.06 | 0.3317 | 0.5351 | 0.05  | 0.1464 | 0.3304 | 0.20  | 0.1442 | 0.4057 | -0.14 | 0.0686 | 0.1160 | -0.22 |
| 4318 Splicing factor U2AF 65 kDa subunit                         | P26368     | 0.0155              | 0.0721              | 0.24                | 0.2233              | 0.6583              | -0.08               | 0.7731              | 0.8133              | 0.02       | 0.2360 | 0.3808 | 0.12  | 0.2008 | 0.4014 | -0.09 | 0.4062 | 0.6223 | 0.05  | 0.0099 | 0.0409 | -0.83 | 0.0001 | 0.0148 | -1.01 | 0.0004 | 0.0292 | -1.54 |
| 4319 Splicing factor proline- and glutamine-rich                 | P23246     | 0.4239              | 0.5012              | 0.03                | 0.4521              | 0.7853              | 0.12                | 0.0036              | 0.0313              | 0.27       | 0.0144 | 0.0489 | 0.17  | 0.0535 | 0.1716 | -0.11 | 0.0962 | 0.2289 | 0.09  | 0.0115 | 0.1040 | 0.61  | 0.1187 | 0.3558 | 0.20  | 0.0367 | 0.1643 | 0.34  |
| 4320 SPOC domain-containing protein 1                            | Q6ZMY3     | 0.0086              | 0.0547              | 0.26                | 0.4231              | 0.7599              | 0.09                | 0.0826              | 0.1770              | 0.11       | 0.4425 | 0.6469 | 0.04  | 0.2550 | 0.4746 | -0.06 | 0.5521 | 0.7861 | -0.03 | 0.3736 | 0.4567 | -2.55 | 0.8708 | 0.9534 | -0.33 | 0.0651 | 0.1222 | 2.06  |
| 4321 Spindin-2                                                   | Q9B1D6     | 0.0093              | 0.0570              | 0.22                | 0.1402              | 0.6543              | 0.27                | 0.0256              | 0.0795              | 0.30       | 0.0113 | 0.0428 | 0.22  | 0.3546 | 0.4522 | 0.05  | 0.1820 | 0.3519 | 0.08  | 0.3736 | 0.5065 | -2.55 | 0.8708 | 1.0454 | -0.33 | 0.0651 | 0.1439 | 2.06  |
| 4322 Sproy-related EVH1 domain-containing protein 1              | Q7Z699     | 0.0434              | 0.1322              | -0.18               | 0.2131              | 0.6626              | -0.10               | 0.1890              | 0.3353              | -0.09      | 0.4081 | 0.5994 | -0.06 | 0.0325 | 0.1314 | 0.21  | 0.8114 | 1.0481 | -0.02 | 0.3736 | 0.4379 | -2.55 | 0.8708 | 0.9180 | -0.33 | 0.0651 | 0.1147 | 2.06  |
| 4323 Sproy-related EVH1 domain-containing protein 2              | Q7Z698     | 0.7988              | 0.8371              | 0.03                | 0.1554              | 0.6620              | 0.15                | 0.9023              | 0.9228              | 0.02       | 0.1840 | 0.3110 | 0.11  | 0.1700 | 0.3578 | 0.12  | 0.8007 | 1.0372 | -0.04 | 0.3736 | 0.4384 | -2.55 | 0.8708 | 0.9191 | -0.33 | 0.0651 | 0.1149 | 2.06  |
| 4324 SPRY domain-containing protein 3                            | Q8NCJ5     | 0.1124              | 0.2440              | 0.07                | 0.9964              | 0.9977              | 0.00                | 0.2218              | 0.3789              | 0.13       | 0.1803 | 0.3051 | 0.07  | 0.0174 | 0.0947 | -0.15 | 0.0437 | 0.1378 | 0.16  | 0.3736 | 0.5660 | -2.55 | 0.8708 | 1.1528 | -0.33 | 0.0651 | 0.1736 | 2.06  |
| 4325 SPRY domain-containing SOCS box protein 1                   | Q96BD6     | 0.0046              | 0.0427              | -0.22               | 0.0098              | 0.4453              | -0.21               | 0.0001              | 0.0305              | -0.49      | 0.0001 | 0.0157 | -0.65 | 0.0000 | 0.0000 | -0.72 | 0.0112 | 0.0728 | -0.30 | 0.0599 | 0.1939 | -0.32 | 0.0229 | 0.1328 | 0.39  | 0.2127 | 0.2814 | -0.15 |
| 4326 Squalene monooxygenase                                      | Q14534     | 0.3805              | 0.5965              | -0.05               | 0.5889              | 0.6944              | -0.04               | 0.0138              | 0.0550              | -0.19      | 0.1398 | 0.2509 | -0.08 | 0.0076 | 0.0633 | -0.22 | 0.1852 | 0.3566 | 0.11  | 0.3736 | 0.5054 | -2.55 | 0.8708 | 1.0434 | -0.33 | 0.0651 | 0.1434 | 2.06  |
| 4327 Squalene synthase                                           | P73268     | 0.0832              | 0.1987              | -0.29               | 0.0441              | 0.5697              | -0.42               | 0.5555              | 0.7798              | -0.10      | 0.0061 | 0.0312 | -0.69 | 0.0811 | 0.2198 | -0.28 | 0.1925 | 0.3665 | 0.18  | 0.3736 | 0.5041 | -2.55 | 0.8708 | 1.0410 | -0.33 | 0.0651 | 0.1428 | 2.06  |
| 4328 Squalene cell carcinoma antigen recognized by T-cells 3     | Q15020     | 0.0334              | 0.1141              | 0.14                | 0.1386              | 0.6509              | 0.24                | 0.0006              | 0.0198              | 0.40       | 0.0014 | 0.0173 | 0.34  | 0.9431 | 0.9558 | 0.00  | 0.0370 | 0.1243 | 0.27  | 0.0744 | 0.2166 | 0.25  | 0.3642 | 0.7355 | 0.03  | 0.0207 | 0.1231 | 0.12  |
| 4329 SRA stem-loop-interacting RNA-binding protein_mitochondrial | Q9GZT3     | 0.2189              | 0.3950              | 0.12                | 0.4391              | 0.7758              | 0.11                | 0.0669              | 0.1431              | 0.23       | 0.0766 | 0.1585 | 0.21  | 0.7763 | 0.8245 | -0.02 | 0.1016 | 0.3913 | 0.13  | 0.2486 | 0.4847 | 0.11  | 0.5441 | 0.9699 | -0.05 | 0.1566 | 0.2203 | -0.14 |
| 4330 Src substrate cortactin                                     | Q14247     | 0.0838              | 0.1998              | 0.15                | 0.1217              | 0.6381              | 0.29                | 0.0053              | 0.0356              | 0.38       | 0.0055 | 0.0298 | 0.37  | 0.1017 | 0.2557 | 0.15  | 0.0316 | 0.1144 | 0.28  | 0.0567 | 0.1894 | 0.45  | 0.7928 | 1.2358 | 0.03  | 0.1805 | 0.2474 | 0.12  |
| 4331 SRSF protein kinase 1                                       | Q96SB4     | 0.4108              | 0.5091              | -3.31               | 0.5752              | 0.7128              | -1.75               | 0.5661              | 0.6480              | -1.19      | 0.5388 | 0.6131 | 0.89  | 0.2938 | 0.4100 | -1.88 | 0.9510 | 0.9930 | 0.09  | 0.0378 | 0.1610 | 0.40  | 0.1532 | 0.4232 | 0.11  | 0.1436 | 0.2052 | 0.09  |
| 4332 SRFB protein kinase 2                                       | P7362      | 0.0097              | 0.0578              | -0.91               | 0.1659              | 0.6600              | -0.81               | 0.0132              | 0.0537              | -0.62      | 0.0105 | 0.0411 | -0.88 | 0.9295 | 0.9467 | -0.01 | 0.0266 | 0.1041 | -0.62 | 0.3736 | 0.5840 | -2.55 | 0.8708 | 1.1845 | -0.33 | 0.0651 | 0.1836 | 2.06  |
| 4333 STAM-binding protein                                        | Q95630     | 0.9117              | 0.9318              | -0.02               | 0.0881              | 0.6192              | -1.03               | 0.0025              | 0.0278              | -1.03      | 0.0071 | 0.0342 | -1.10 | 0.0150 | 0.0873 | -1.21 | 0.2034 | 0.3815 | -0.61 | 0.2259 | 0.4564 | 0.17  | 0.6972 | 1.1404 | -0.03 | 0.1239 | 0.1832 | 0.19  |
| 4334 Staphylococcal nuclease domain-containing protein 1         | Q7KZP4     | 0.0024              | 0.0330              | 0.33                | 0.1343              | 0.6496              | 0.29                | 0.0034              | 0.0314              | 0.45       | 0.0005 | 0.0126 | 0.51  | 0.0175 | 0.0951 | 0.25  | 0.0201 | 0.0563 | 0.46  | 0.2259 | 0.4505 | 0.40  | 0.9964 | 0.9976 | 0.00  | 0.9486 | 0.9955 | 0.00  |
| 4335 Starch-binding domain-containing protein 1                  | O95210     | 0.2632              | 0.4539              | -0.19               | 0.0070              | 0.4120              | 0.94                | 0.1841              | 0.3288              | 0.20       | 0.0249 | 0.0704 | 0.49  | 0.0231 | 0.1102 | 0.53  | 0.2719 | 0.4661 | 0.15  | 0.3736 | 0.4867 | -2.55 | 0.8708 | 1.0091 | -0.33 | 0.0651 | 0.1349 | 2.06  |
| 4336 StAR-related lipid transfer protein 9                       | Q9P2P6     | 0.0048              | 0.0429              | -0.11               | 0.1326              | 0.6486              | -0.15               | 0.2076              | 0.3610              | 0.03       | 0.0008 | 0.0141 | -0.19 | 0.0059 | 0.0566 | -0.12 | 0.0019 | 0.0526 | 0.37  | 0.0081 | 0.0918 | 0.69  | 0.0005 | 0.0225 | 0.81  | 0.0079 | 0.0799 | 0.32  |
| 4337 START domain-containing protein 10                          | Q9Y365     | 0.1939              | 0.3616              | 0.07                | 0.3059              | 0.6786              | 0.17                | 0.0095              | 0.0454              | 0.23       | 0.2137 | 0.3506 | 0.07  | 0.4489 | 0.5424 | -0.04 | 0.0903 | 0.2190 | 0.11  | 0.3736 | 0.5376 | -2.55 | 0.8708 | 1.1018 | -0.33 | 0.0651 | 0.1588 | 2.06  |
| 4338 Stathmin                                                    | P16949     | 0.0188              | 0.0806              | 0.                  |                     |                     |                     |                     |                     |            |        |        |       |        |        |       |        |        |       |        |        |       |        |        |       |        |        |       |

Supplementary Table S2. Overview on all relatively quantified 5180 proteins statistical analysis

| Protein name                                                                                                      | UniProt | MCF-7               |            |                     |         | MDA-MB-231          |        |                     |            |
|-------------------------------------------------------------------------------------------------------------------|---------|---------------------|------------|---------------------|---------|---------------------|--------|---------------------|------------|
|                                                                                                                   |         | Dai SC20 vs control |            | Gen SC20 vs control |         | Dai IC20 vs control |        | Gen IC20 vs control |            |
|                                                                                                                   |         | p value             | BH q value | log2FC              | p value | BH q value          | log2FC | p value             | BH q value |
| 4372 Succinyl-CoA:3-ketoacid coenzyme A transferase 1, mitochondrial                                              | P55809  | 0.4108              | 0.5083     | -3.31               | 0.5752  | 0.7118              | -1.75  | 0.5661              | 0.6472     |
| 4373 Sulfhydryl oxidase 2                                                                                         | O6ZRP7  | 0.6603              | 0.7207     | 0.07                | 0.4217  | 0.7593              | -0.18  | 0.0073              | 0.0403     |
| 4374 Sulfide:quinone oxidoreductase, mitochondrial                                                                | Q9Y6N5  | 0.0142              | 0.0692     | -0.55               | 0.1407  | 0.6531              | -0.75  | 0.0039              | 0.0319     |
| 4375 Sulfotransferase 1A1                                                                                         | P40225  | 0.0003              | 0.0143     | 0.36                | 0.2277  | 0.6604              | 0.12   | 0.0006              | 0.0191     |
| 4376 Sulfotransferase 1A2                                                                                         | P50226  | 0.9315              | 0.9478     | 0.02                | 0.1645  | 0.6616              | 0.44   | 0.2463              | 0.4120     |
| 4377 Sulfotransferase 1A3                                                                                         | P02MM9  | 0.8152              | 0.8514     | -0.03               | 0.8147  | 0.8673              | 0.03   | 0.0619              | 0.1446     |
| 4378 Sulfotransferase 1C2                                                                                         | O00338  | 0.4108              | 0.5082     | -3.31               | 0.5752  | 0.7116              | -1.75  | 0.5661              | 0.6470     |
| 4379 Sulfotransferase family cytosolic 2B member 1                                                                | O00204  | 0.0107              | 0.0597     | 3.95                | 0.2593  | 0.6636              | 0.76   | 0.0326              | 0.0928     |
| 4380 SUMO-activating enzyme subunit 1                                                                             | Q9UBE0  | 0.0021              | 0.0312     | 0.32                | 0.9782  | 0.9856              | 0.00   | 0.0314              | 0.0905     |
| 4381 SUMO-activating enzyme subunit 2                                                                             | Q9UBT2  | 0.3473              | 0.5563     | 0.06                | 0.4041  | 0.7473              | 0.09   | 0.8380              | 0.8694     |
| 4382 SUMO-conjugating enzyme UBC9                                                                                 | P63279  | 0.1073              | 0.2358     | 0.07                | 0.4213  | 0.7596              | 0.14   | 0.4006              | 0.6036     |
| 4383 SUMO-specific isopeptidase USPL1                                                                             | Q5W0Q7  | 0.4108              | 0.5081     | -3.31               | 0.5752  | 0.7114              | -1.75  | 0.5661              | 0.6469     |
| 4384 Superoxide dismutase [Cu-Zn]                                                                                 | P00441  | 0.0431              | 0.1317     | 0.25                | 0.3676  | 0.7164              | 0.07   | 0.5586              | 0.7825     |
| 4385 Superoxide dismutase [Mn], mitochondrial                                                                     | P04179  | 0.4108              | 0.5080     | -3.31               | 0.5752  | 0.7113              | -1.75  | 0.5661              | 0.6468     |
| 4386 Suppression of tumorigenicity 5 protein                                                                      | P78524  | 0.1067              | 0.2352     | 0.05                | 0.3091  | 0.6790              | 0.12   | 0.0013              | 0.0222     |
| 4387 Suppressor of IKBKE 1                                                                                        | Q9BRV8  | 0.1152              | 0.2486     | -0.14               | 0.7275  | 0.8011              | 0.04   | 0.0891              | 0.1873     |
| 4388 Surfeit locus protein 2                                                                                      | Q15527  | 0.9854              | 0.9890     | 0.00                | 0.6881  | 0.7477              | -0.03  | 0.7024              | 0.7493     |
| 4389 Surfeit locus protein 4                                                                                      | I15260  | 0.6181              | 0.6818     | 0.07                | 0.6516  | 0.7506              | -0.14  | 0.0624              | 0.1452     |
| 4390 Surfeit locus protein 6                                                                                      | Q75683  | 0.0790              | 0.1928     | -0.30               | 0.4197  | 0.7578              | 0.27   | 0.6216              | 0.6759     |
| 4391 SURP and G-patch domain-containing protein 1                                                                 | Q8WJZ8  | 0.1008              | 0.2263     | 0.19                | 0.5739  | 0.8861              | 0.11   | 0.0312              | 0.0902     |
| 4392 Survival motor neuron protein                                                                                | O16637  | 0.1337              | 0.2769     | 0.16                | 0.2045  | 0.6600              | 0.34   | 0.0322              | 0.0751     |
| 4393 Survival of motor neuron-related-apoptosis factor 30                                                         | O75940  | 0.0627              | 0.1656     | -0.15               | 0.0081  | 0.4114              | -0.44  | 0.0603              | 0.1420     |
| 4394 Sushi repeat-containing protein SRPX2                                                                        | O60687  | 0.2789              | 0.4276     | 0.13                | 0.6846  | 0.7699              | -0.10  | 0.2851              | 0.4627     |
| 4395 SUZ domain-containing protein 1                                                                              | Q7Z422  | 0.4971              | 0.5712     | 0.06                | 0.1861  | 0.6667              | 0.22   | 0.1540              | 0.2854     |
| 4396 SWI/SNF complex subunit SMARCC1                                                                              | Q92922  | 0.4108              | 0.5079     | -3.31               | 0.5752  | 0.7111              | -1.75  | 0.5661              | 0.6466     |
| 4397 SWI/SNF complex subunit SMARCC2                                                                              | O8TAQ2  | 0.4108              | 0.5077     | -3.31               | 0.5752  | 0.7109              | -1.75  | 0.5661              | 0.6465     |
| 4398 SWI/SNF-related matrix-associated actin-dependent regulator of chromatin subfamily A containing DEAD/H box 1 | Q9H4L7  | 0.1375              | 0.2821     | -0.05               | 0.0422  | 0.5693              | 0.12   | 0.5254              | 0.7467     |
| 4399 SWI/SNF-related matrix-associated actin-dependent regulator of chromatin subfamily A member 5                | O60264  | 0.1182              | 0.2531     | 0.06                | 0.4947  | 0.8171              | 0.09   | 0.0016              | 0.0229     |
| 4400 SWI/SNF-related matrix-associated actin-dependent regulator of chromatin subfamily A-like protein 1          | Q9NZC9  | 0.0654              | 0.1692     | 0.13                | 0.9423  | 0.9618              | 0.01   | 0.8867              | 0.9102     |
| 4401 SWI/SNF-related matrix-associated actin-dependent regulator of chromatin subfamily D member 1                | Q96GM5  | 0.4646              | 0.5409     | 0.05                | 0.1523  | 0.6602              | 0.13   | 0.3472              | 0.5412     |
| 4402 SWI/SNF-related matrix-associated actin-dependent regulator of chromatin subfamily D member 3                | Q6STE5  | 0.4074              | 0.6279     | -0.23               | 0.3059  | 0.6783              | -0.26  | 0.2729              | 0.4465     |
| 4403 SWI/SNF-related matrix-associated actin-dependent regulator of chromatin subfamily E member 1                | Q969G3  | 0.4108              | 0.5076     | -3.31               | 0.5752  | 0.7108              | -1.75  | 0.5661              | 0.6463     |
| 4404 Synapse differentiation-inducing gene protein 1                                                              | Q9H7V2  | 0.0009              | 0.0211     | -0.22               | 0.1453  | 0.6568              | 0.20   | 0.1353              | 0.2582     |
| 4405 Synapse-associated protein 1                                                                                 | Q96A49  | 0.4884              | 0.5626     | -0.04               | 0.0789  | 0.6127              | 0.20   | 0.0229              | 0.0746     |
| 4406 Synapsin-3                                                                                                   | I14994  | 0.2201              | 0.3963     | 0.41                | 0.6227  | 0.7202              | -0.41  | 0.2238              | 0.3813     |
| 4407 Synaptic functional regulator FMR1                                                                           | Q06787  | 0.0037              | 0.0386     | 0.22                | 0.7070  | 0.6352              | 0.20   | 0.0348              | 0.0970     |
| 4408 Synaptic vesicle 2-related protein                                                                           | Q8N4V2  | 0.0007              | 0.0197     | 1.06                | 0.8488  | 0.8915              | -0.23  | 0.0009              | 0.0202     |
| 4409 Synaptic vesicle membrane protein VAT-1 homolog                                                              | Q9Y936  | 0.0094              | 0.0571     | 0.24                | 0.3053  | 0.6760              | 0.13   | 0.2290              | 0.3884     |
| 4410 Synaptic vesicle membrane protein VAT-1 homolog-like                                                         | Q9HCJ6  | 0.4108              | 0.5075     | -3.31               | 0.5752  | 0.7106              | -1.75  | 0.5661              | 0.6462     |
| 4411 Synaptobrevin homolog YKT6                                                                                   | I15498  | 0.0050              | 0.0432     | 0.28                | 0.0999  | 0.6287              | 0.36   | 0.0046              | 0.0337     |
| 4412 Synaptogyrin-1                                                                                               | Q43739  | 0.4108              | 0.5074     | -3.31               | 0.5752  | 0.7104              | -1.75  | 0.5661              | 0.6460     |
| 4413 Synaptogyrin-2                                                                                               | Q43760  | 0.3651              | 0.5784     | 0.04                | 0.3131  | 0.6803              | 0.09   | 0.0986              | 0.2019     |
| 4414 Synaptotagmin-2-binding protein                                                                              | P57105  | 0.0017              | 0.0279     | -0.25               | 0.9740  | 0.9825              | 0.00   | 0.0442              | 0.1148     |
| 4415 Synaptotagmin complex central element protein 1                                                              | Q8N0S2  | 0.0236              | 0.0922     | -0.19               | 0.0896  | 0.6247              | 0.08   | 0.2732              | 0.4469     |
| 4416 Synaptotagmin complex central element protein 2                                                              | Q6PIF2  | 0.0575              | 0.1576     | 0.14                | 0.8464  | 0.8895              | -0.03  | 0.8328              | 0.8654     |
| 4417 Synaptotagmin complex central element protein 3                                                              | A1L190  | 0.0832              | 0.1986     | 0.20                | 0.2257  | 0.6605              | 0.17   | 0.0263              | 0.0810     |
| 4418 Synaptotagmin complex protein 2-like                                                                         | Q5T4T6  | 0.4108              | 0.5073     | -3.31               | 0.5752  | 0.7103              | -1.75  | 0.5661              | 0.6459     |
| 4419 Synaptophysin-like protein 1                                                                                 | Q16563  | 0.4679              | 0.5440     | 0.04                | 0.3139  | 0.6809              | 0.21   | 0.1449              | 0.2717     |
| 4420 Synaptosomal-associated protein 23                                                                           | O00161  | 0.0047              | 0.0429     | -0.15               | 0.4982  | 0.8208              | -0.06  | 0.1331              | 0.2553     |
| 4421 Synaptosomal-associated protein 29                                                                           | O95721  | 0.0000              | 0.0000     | 0.17                | 0.0151  | 0.4574              | 0.19   | 0.0003              | 0.0229     |
| 4422 Synaptotagmin-16                                                                                             | Q178D7  | 0.8510              | 0.8815     | 0.07                | 0.0413  | 0.5675              | -0.78  | 0.2362              | 0.3975     |
| 4423 Synaptotagmin-like protein 2                                                                                 | Q9CHH5  | 0.0001              | 0.0093     | -1.60               | 0.0144  | 0.4521              | -0.38  | 0.0000              | 0.0000     |
| 4424 Synaptotagmin-like protein 4                                                                                 | Q96C24  | 0.0955              | 0.2180     | 0.16                | 0.5419  | 0.8571              | 0.09   | 0.5411              | 0.7631     |
| 4425 Synectin-1                                                                                                   | P18827  | 0.1380              | 0.2825     | -0.13               | 0.3108  | 0.6793              | 0.16   | 0.3474              | 0.5143     |
| 4426 Synexin                                                                                                      | Q96JG6  | 0.4108              | 0.5071     | -3.31               | 0.5752  | 0.7101              | -1.75  | 0.5661              | 0.6458     |
| 4427 Synembyrin-A                                                                                                 | Q9NPKQ  | 0.1458              | 0.2935     | 0.26                | 0.2337  | 0.6615              | 0.27   | 0.0485              | 0.1226     |
| 4428 Synemin                                                                                                      | I15061  | 0.0003              | 0.0141     | 0.23                | 0.1404  | 0.6546              | 0.26   | 0.0785              | 0.1700     |
| 4429 Synenulin                                                                                                    | Q9NX95  | 0.4108              | 0.5070     | -3.31               | 0.5752  | 0.7099              | -1.75  | 0.5661              | 0.6456     |
| 4430 Syntaxin-10                                                                                                  | O60499  | 0.0072              | 0.0500     | -4.77               | 0.2375  | 0.6618              | -3.01  | 0.0018              | 0.0238     |
| 4431 Syntaxin-11                                                                                                  | O75558  | 0.6372              | 0.6992     | -0.04               | 0.4365  | 0.7228              | -1.19  | 0.0013              | 0.0221     |
| 4432 Syntaxin-12                                                                                                  | Q86Y82  | 0.2931              | 0.4910     | -0.07               | 0.6829  | 0.7685              | -0.03  | 0.0981              | 0.2012     |
| 4433 Syntaxin-16                                                                                                  | I14662  | 0.3438              | 0.5522     | -0.03               | 0.1929  | 0.6684              | -0.19  | 0.0799              | 0.1725     |
| 4434 Syntaxin-17                                                                                                  | P56962  | 0.0184              | 0.0797     | 0.16                | 0.2009  | 0.6616              | 0.25   | 0.0002              | 0.0173     |
| 4435 Syntaxin-19                                                                                                  | Q8N4C7  | 0.0067              | 0.0490     | 0.88                | 0.0013  | 0.2494              | 1.02   | 0.1327              | 0.2549     |
| 4436 Syntaxin-1B                                                                                                  | P61266  | 0.4108              | 0.5069     | -3.31               | 0.5752  | 0.7098              | -1.75  | 0.5661              | 0.6455     |
| 4437 Syntaxin-4                                                                                                   | Q12846  | 0.1636              | 0.3203     | -0.09               | 0.1404  | 0.6534              | 0.27   | 0.3989              | 0.6021     |
| 4438 Syntaxin-5                                                                                                   | Q13190  | 0.0099              | 0.0579     | 0.36                | 0.0796  | 0.6136              | 0.54   | 0.0010              | 0.0220     |
| 4439 Syntaxin-6                                                                                                   | O43752  | 0.5865              | 0.6535     | 0.04                | 0.1014  | 0.6321              | 0.24   | 0.1562              | 0.2886     |
| 4440 Syntaxin-7                                                                                                   | I15400  | 0.0369              | 0.1208     | 0.13                | 0.1123  | 0.6337              | 0.24   | 0.3454              | 0.5396     |
| 4441 Syntaxin-binding protein 1                                                                                   | P61764  | 0.0714              | 0.1794     | 0.11                | 0.3567  | 0.7085              | 0.31   | 0.0069              | 0.0396     |
| 4442 Syntaxin-binding protein 2                                                                                   | Q15833  | 0.0028              | 0.0353     | 0.36                | 0.2269  | 0.6607              | 0.12   | 0.2091              | 0.3629     |

Supplementary Table S2. Overview on all relatively quantified 5180 proteins statistical analysis

|      | Protein name                                            | UniProt    | MCF-7               |                     |                     |                     | MDA-MB-231          |                     |                     |                     |
|------|---------------------------------------------------------|------------|---------------------|---------------------|---------------------|---------------------|---------------------|---------------------|---------------------|---------------------|
|      |                                                         |            | Dai SC20 vs control | Gen SC20 vs control | SSE SC20 vs control | Dai IC20 vs control | Gen IC20 vs control | SSE IC20 vs control | Dai IC20 vs control | Gen IC20 vs control |
|      |                                                         |            | p value             | BH q value          | log2FC              | p value             | BH q value          | log2FC              | p value             | BH q value          |
| 4443 | Syntaxin-binding protein 3                              | O00186     | 0.0170              | 0.0760              | 0.39                | 0.7263              | 0.8001              | -0.03               | 0.0036              | 0.0312              |
| 4444 | Syntaxin-1                                              | O00560     | 0.0025              | 0.0332              | 0.19                | 0.1435              | 0.6555              | 0.04                | 0.0003              | 0.0210              |
| 4445 | T cell receptor alpha constant                          | P01848     | 0.1884              | 0.3544              | 0.13                | 0.7292              | 0.8028              | 0.04                | 0.0960              | 0.1979              |
| 4446 | T cell receptor alpha variable 12-2                     | A0A075B6T6 | 0.4108              | 0.5068              | -3.31               | 0.5752              | 0.7096              | -1.75               | 0.5661              | 0.6453              |
| 4447 | T cell receptor beta variable 12-4                      | A0A0B4J2E0 | 0.4108              | 0.5067              | -3.31               | 0.5752              | 0.7094              | -1.75               | 0.5661              | 0.6452              |
| 4448 | T cell receptor beta variable 7-9                       | P04435     | 0.4108              | 0.5065              | -3.31               | 0.5752              | 0.7092              | -1.75               | 0.5661              | 0.6451              |
| 4449 | T cell receptor gamma constant 2                        | P03986     | 0.4108              | 0.5064              | -3.31               | 0.5752              | 0.7091              | -1.75               | 0.5661              | 0.6449              |
| 4450 | Tail-anchored protein insertion receptor WRB            | O00258     | 0.4108              | 0.5063              | -3.31               | 0.5752              | 0.7089              | -1.75               | 0.5661              | 0.6448              |
| 4451 | Talin-1                                                 | Q9Y490     | 0.0687              | 0.1742              | 0.07                | 0.3173              | 0.6811              | 0.13                | 0.0054              | 0.0557              |
| 4452 | Talin-2                                                 | Q9Y4G6     | 0.4108              | 0.5062              | -3.31               | 0.5752              | 0.7087              | -1.75               | 0.5661              | 0.6446              |
| 4453 | TAR DNA-binding protein 43                              | Q13148     | 0.1201              | 0.2556              | -0.11               | 0.7952              | 0.8514              | 0.02                | 0.0363              | 0.0998              |
| 4454 | Target of EGFR1 protein 1                               | Q96GM8     | 0.6725              | 0.7303              | -0.03               | 0.3286              | 0.6883              | 0.08                | 0.0571              | 0.1366              |
| 4455 | Target of Myb protein 1                                 | O60784     | 0.0433              | 0.1319              | -0.23               | 0.1223              | 0.6399              | -0.15               | 0.0475              | 0.1209              |
| 4456 | Target of rapamycin complex subunit LST8                | Q9BYC4     | 0.0262              | 0.0980              | -0.31               | 0.5813              | 0.6889              | -0.07               | 0.8748              | 0.9009              |
| 4457 | TATA element modulatory factor                          | P82094     | 0.0056              | 0.0450              | 0.27                | 0.6994              | 0.7784              | -0.07               | 0.4707              | 0.6880              |
| 4458 | TATA-binding protein-associated factor 2N               | Q92804     | 0.0345              | 0.1161              | -0.14               | 0.3070              | 0.6776              | 0.12                | 0.0313              | 0.0904              |
| 4459 | Tau-tubulin kinase 1                                    | Q5TCY1     | 0.4108              | 0.5061              | -3.31               | 0.5752              | 0.7086              | -1.75               | 0.5661              | 0.6445              |
| 4460 | Tax1-binding protein 1                                  | Q86VP1     | 0.9247              | 0.9423              | -0.01               | 0.241               | 0.4858              | -0.22               | 0.5801              | 0.6376              |
| 4461 | TBC domain-containing protein kinase-like protein       | Q8TEA7     | 0.4108              | 0.5059              | -3.31               | 0.5752              | 0.7084              | -1.75               | 0.5661              | 0.6443              |
| 4462 | TBC1 domain family member 1                             | Q86T10     | 0.4139              | 0.4917              | 0.07                | 0.1062              | 0.6309              | 0.38                | 0.0187              | 0.0655              |
| 4463 | TBC1 domain family member 10A                           | Q9BX36     | 0.1039              | 0.2305              | -0.22               | 0.6885              | 0.7721              | -0.07               | 0.2203              | 0.3771              |
| 4464 | TBC1 domain family member 10B                           | Q4K4MP7    | 0.0054              | 0.0442              | -0.12               | 0.7170              | 0.7928              | 0.04                | 0.2460              | 0.4116              |
| 4465 | TBC1 domain family member 13                            | Q9NVGR     | 0.1815              | 0.3450              | -0.19               | 0.4454              | 0.7813              | 0.20                | 0.2564              | 0.2446              |
| 4466 | TBC1 domain family member 15                            | Q8TQ07     | 0.0024              | 0.0329              | -1.34               | 0.0524              | 0.5812              | -0.50               | 0.0183              | 0.0648              |
| 4467 | TBC1 domain family member 16                            | Q8TBP0     | 0.0744              | 0.1850              | -0.05               | 0.8882              | 0.9202              | 0.01                | 0.0309              | 0.0898              |
| 4468 | TBC1 domain family member 23                            | Q8NLY8     | 0.0122              | 0.0639              | -0.64               | 0.0586              | 0.5906              | -0.43               | 0.0150              | 0.0577              |
| 4469 | TBC1 domain family member 2A                            | Q9BYX2     | 0.1787              | 0.3414              | -0.05               | 0.5386              | 0.8545              | -0.08               | 0.0086              | 0.0435              |
| 4470 | TBC1 domain family member 30                            | Q9Y219     | 0.0619              | 0.1648              | -0.13               | 0.2432              | 0.6592              | 0.16                | 0.0340              | 0.0957              |
| 4471 | TBC1 domain family member 3D                            | QA087WVF3  | 0.1481              | 0.2968              | -0.38               | 0.1259              | 0.6425              | -0.39               | 0.0336              | 0.0950              |
| 4472 | TBC1 domain family member 4                             | O60343     | 0.8619              | 0.8908              | -0.01               | 0.2072              | 0.6589              | 0.41                | 0.0145              | 0.0566              |
| 4473 | TBC1 domain family member 5                             | Q92609     | 0.1667              | 0.3246              | -0.59               | 0.0538              | 0.5842              | -10.26              | 0.3784              | 0.5775              |
| 4474 | TBC1 domain family member 8                             | Q95759     | 0.4031              | 0.6231              | -0.04               | 0.7469              | 0.8166              | 0.06                | 0.0257              | 0.0798              |
| 4475 | TBC1 domain family member 8B                            | Q0IMM8     | 0.4108              | 0.5058              | -3.31               | 0.5752              | 0.7082              | -1.75               | 0.5661              | 0.6442              |
| 4476 | TBC1 domain family member 9B                            | Q66K14     | 0.4108              | 0.5057              | -3.31               | 0.5752              | 0.7081              | -1.75               | 0.5661              | 0.6441              |
| 4477 | T-box transcription factor TBX15                        | Q96SF7     | 0.0962              | 0.2188              | 0.11                | 0.0552              | 0.4551              | 0.22                | 0.0323              | 0.0923              |
| 4478 | T-cell activation Rho GTPase-activating protein         | Q8N103     | 0.4108              | 0.5056              | -3.31               | 0.5752              | 0.7079              | -1.75               | 0.5661              | 0.6439              |
| 4479 | T-complex protein 1 subunit alpha                       | P17987     | 0.0124              | 0.0647              | 0.20                | 0.1381              | 0.6533              | 0.26                | 0.0069              | 0.0398              |
| 4480 | T-complex protein 1 subunit beta                        | P28171     | 0.0080              | 0.0528              | 0.21                | 0.0764              | 0.7055              | 0.26                | 0.0025              | 0.0278              |
| 4481 | T-complex protein 1 subunit delta                       | P50991     | 0.0038              | 0.0391              | 0.27                | 0.0797              | 0.6116              | 0.33                | 0.0006              | 0.0204              |
| 4482 | T-complex protein 1 subunit epsilon                     | P48643     | 0.0023              | 0.0326              | 0.29                | 0.1765              | 0.6620              | 0.26                | 0.0008              | 0.0213              |
| 4483 | T-complex protein 1 subunit eta                         | Q9P332     | 0.0675              | 0.1722              | 0.18                | 0.2010              | 0.6611              | 0.15                | 0.0099              | 0.0463              |
| 4484 | T-complex protein 1 subunit gamma                       | P49368     | 0.0105              | 0.0591              | 0.22                | 0.1228              | 0.6624              | 0.23                | 0.0010              | 0.0211              |
| 4485 | T-complex protein 1 subunit theta                       | P50990     | 0.0079              | 0.0524              | 0.36                | 0.2020              | 0.6602              | 0.30                | 0.0043              | 0.0324              |
| 4486 | T-complex protein 1 subunit zeta                        | P40227     | 0.0015              | 0.0258              | 0.26                | 0.1823              | 0.6659              | 0.15                | 0.0028              | 0.0292              |
| 4487 | T-complex protein 1 subunit zeta-2                      | Q92526     | 0.0194              | 0.0817              | -0.22               | 0.0591              | 0.5921              | -0.40               | 0.0645              | 0.1482              |
| 4488 | T-complex protein 11-like protein 2                     | Q8N4U5     | 0.4108              | 0.5054              | -3.31               | 0.5752              | 0.7077              | -1.75               | 0.5661              | 0.6438              |
| 4489 | Tctex1 domain-containing protein 1                      | Q8N7M0     | 0.4108              | 0.5053              | -3.31               | 0.5752              | 0.7076              | -1.75               | 0.5661              | 0.6436              |
| 4490 | Tesart homolog 3                                        | Q63HK5     | 0.0036              | 0.0381              | -0.24               | 0.8514              | 0.8935              | -0.03               | 0.0894              | 0.1877              |
| 4491 | Tectonin beta-propeller repeat-containing protein 1     | Q7Z6L1     | 0.0111              | 0.0603              | -0.15               | 0.2963              | 0.6720              | 0.10                | 0.0789              | 0.1855              |
| 4492 | Tektin-1                                                | Q96V94     | 0.4108              | 0.5052              | -3.31               | 0.5752              | 0.7074              | -1.75               | 0.5661              | 0.6435              |
| 4493 | Tektin-5                                                | Q96M29     | 0.0723              | 0.1809              | -0.30               | 0.0011              | 0.2374              | -0.34               | 0.0088              | 0.0441              |
| 4494 | Telethonin                                              | O15273     | 0.6151              | 0.6795              | -0.10               | 0.0721              | 0.6063              | 0.22                | 0.0917              | 0.9319              |
| 4495 | Telomerase RNA component interacting RNase              | Q9BO61     | 0.0322              | 0.1116              | 0.21                | 0.0752              | 0.6144              | 0.37                | 0.0110              | 0.0486              |
| 4496 | Telomerase length and silencing protein 1 homolog       | Q9NZ63     | 0.2434              | 0.4286              | -0.17               | 0.9842              | 0.9888              | -0.01               | 0.1614              | 0.2365              |
| 4497 | Telomerase-associated protein RIF1                      | Q5UIB0     | 0.4056              | 0.6359              | -0.05               | 0.7391              | 0.8103              | -0.05               | 0.2737              | 0.4475              |
| 4498 | Telomeric repeat-binding factor 2-interacting protein 1 | Q9NBY0     | 0.0133              | 0.0671              | -0.24               | 0.0707              | 0.7789              | -0.02               | 0.0130              | 0.0533              |
| 4499 | Tenascin-X                                              | P22105     | 0.4108              | 0.5051              | -3.31               | 0.5752              | 0.7072              | -1.75               | 0.5661              | 0.6434              |
| 4500 | Tenascin-X                                              | Q9P273     | 0.0862              | 0.2040              | -0.22               | 0.0277              | 0.5106              | -0.18               | 0.0337              | 0.0951              |
| 4501 | Tensin-3                                                | Q68C22     | 0.0205              | 0.0845              | 0.23                | 0.0542              | 0.5874              | 0.31                | 0.0360              | 0.0993              |
| 4502 | Terminal nucleotidyltransferase 5C                      | Q5VWP2     | 0.0784              | 0.1918              | 0.20                | 0.0893              | 0.6251              | 0.17                | 0.0396              | 0.1059              |
| 4503 | Terminal uridylyltransferase 4                          | Q5TAX3     | 0.4108              | 0.5050              | -3.31               | 0.5752              | 0.7071              | -1.75               | 0.5661              | 0.6432              |
| 4504 | Testican-2                                              | Q92563     | 0.0582              | 0.1588              | -0.25               | 0.1976              | 0.6703              | -0.58               | 0.4980              | 0.7204              |
| 4505 | Testican-3                                              | Q9BQ16     | 0.0241              | 0.0932              | -0.14               | 0.5793              | 0.6875              | 0.07                | 0.5622              | 0.7864              |
| 4506 | Testin                                                  | Q5054      | 0.0504              | 0.1450              | -0.03               | 0.6395              | 0.7343              | 0.02                | 0.0001              | 0.0140              |
| 4507 | Testis development-related protein                      | Q86YL5     | 0.9311              | 0.9479              | 0.01                | 0.6984              | 0.7778              | -0.07               | 0.9032              | 0.9233              |
| 4508 | Testis-expressed protein 10                             | Q9NXF1     | 0.0067              | 0.0489              | -0.63               | 0.4272              | 0.7628              | 0.08                | 0.0021              | 0.0257              |
| 4509 | Testis-expressed protein 101                            | Q9BY14     | 0.1316              | 0.2736              | 0.90                | 0.4342              | 0.7705              | 0.77                | 0.4693              | 0.6869              |
| 4510 | Testis-expressed protein 15                             | Q9BXT5     | 0.2757              | 0.4692              | 0.07                | 0.7474              | 0.6112              | 0.13                | 0.7232              | 0.7677              |
| 4511 | Testis-expressed protein 264                            | Q9Y619     | 0.0072              | 0.0499              | -0.17               | 0.0494              | 0.5763              | 0.12                | 0.4879              | 0.7079              |
| 4512 | Testis-expressed protein 48                             | AOA1B0GUV7 | 0.4108              | 0.5049              | -3.31               | 0.5752              | 0.7069              | -1.75               | 0.5661              | 0.6431              |
| 4513 | Testis-expressed protein 52                             | A6GNC8     | 0.5113              | 0.5840              | 0.05                | 0.2533              | 0.6627              | 0.30                | 0.0715              | 0.1594              |
| 4514 | Testis-expressed protein 54                             | Q9BZW7     | 0.4108              | 0.5047              | -3.31               | 0.5752              | 0.7067              | -1.75               | 0.5661              | 0.6430              |
| 4515 | Testis-specific gene 10 protein                         | Q9BZW7     | 0.4108              | 0.5046              | -3.31               | 0.5752              | 0.7067              | -1.75               | 0.5661              | 0.6429              |
| 4516 | Testis-specific serine/threonine-protein kinase 3       | Q96N98     | 0.0499              | 0.1440              | 0.22                | 0.1010              | 0.6837              | 0.12                | 0.5362              | 0.7574              |
| 4517 | Testis-specific serine/threonine-protein kinase 4       | Q6SA08     | 0.0522              | 0.1479              | 0.14                | 0.3999              | 0.6349              | 0.29                | 0.0024              | 0.0273              |
| 4518 | Testis-specific Y-encoded-like protein 5                | Q86VY4     | 0.1253              | 0.2638              | -0.06               | 0.3100              | 0.4401              | 0.19                | 0.0188              | 0.0657              |
| 4519 | Tether containing UBX domain for GLUT4                  | Q9BZE9     | 0.7436              | 0.7916              | -0.02               | 0.0307              | 0.7041              | 0.13                | 0.7544              | 0.7959              |
| 4520 | Tetraspanin-13                                          | Q95857     | 0.2123              | 0.3860              | 0.04                | 0.4124              | 0.7525              | -0.10               | 0.0010              | 0.0208              |
| 4521 | Tetraspanin-15                                          | Q95858     | 0.0019              | 0.0297              | -0.26               | 0.0232              | 0.4826              | -0.30               | 0.1797              | 0.2322              |
| 4522 | Tetraspanin-31                                          | Q12999     | 0.0573              | 0.1571              | -0.12               | 0.2728              | 0.6656              | 0.12                | 0.5575              | 0.7816              |
| 4523 | Tetralipopeptide repeat protein 1                       | Q99614     | 0.4784              | 0.5534              | 0.04                | 0.6404              | 0.7350              | 0.05                | 0.8233              | 0.8574              |
| 4524 | Tetralipopeptide repeat protein 13                      | Q8NBPO     | 0.1313              | 0.2733              | -0.12               | 0.3890              | 0.7322              | 0.09                | 0.0037              | 0.0316              |
| 4525 | Tetralipopeptide repeat protein 14                      | Q96N46     | 0.5185              | 0.5904              | -0.04               | 0.2402              | 0.6604              | 0.14                | 0.0021              | 0.0258              |
| 4526 | Tetralipopeptide repeat protein 21A                     | Q8NDW8     | 0.1182              | 0.2530              | 0.32                | 0.1642              | 0.6629              | 0.25                | 0.1261              | 0.2457              |

Supplementary Table S2. Overview on all relatively quantified 5180 proteins statistical analysis

|      | Protein name                                              | UniProt | MCF-7               |                     |                     |                     | MDA-MB-231          |                     |                     |                     |
|------|-----------------------------------------------------------|---------|---------------------|---------------------|---------------------|---------------------|---------------------|---------------------|---------------------|---------------------|
|      |                                                           |         | Dai SC20 vs control | Gen SC20 vs control | SSE SC20 vs control | Dai IC20 vs control | Gen IC20 vs control | SSE IC20 vs control | Dai IC20 vs control | Gen IC20 vs control |
|      |                                                           |         | p value             | BH q value          | log2FC              | p value             | BH q value          | log2FC              | p value             | BH q value          |
| 4527 | Tetralactide repeat protein 24                            | A2A3L6  | 0.2720              | 0.4647              | 0.20                | 0.7756              | 0.8380              | 0.05                | 0.5685              | 0.6263              |
| 4528 | Tetralactide repeat protein 25                            | Q96NG3  | 0.4108              | 0.5045              | -3.31               | 0.5752              | 0.7064              | -1.75               | 0.5661              | 0.6426              |
| 4529 | Tetralactide repeat protein 27                            | Q6P3X3  | 0.4547              | 0.5319              | -0.16               | 0.7328              | 0.8054              | -0.13               | 0.9678              | 0.9734              |
| 4530 | Tetralactide repeat protein 28                            | Q96A94  | 0.4108              | 0.5044              | -3.31               | 0.5752              | 0.7062              | -1.75               | 0.5661              | 0.6425              |
| 4531 | Tetralactide repeat protein 30A                           | Q6MWT1  | 0.0222              | 0.0889              | -0.99               | 0.2221              | 0.6574              | -1.09               | 0.0512              | 0.1271              |
| 4532 | Tetralactide repeat protein 38                            | Q5R3I4  | 0.4108              | 0.5043              | -3.31               | 0.5752              | 0.7061              | -1.75               | 0.5661              | 0.6424              |
| 4533 | Tetralactide repeat protein 4                             | Q95801  | 0.0928              | 0.2143              | 0.27                | 0.6767              | 0.7632              | -0.08               | 0.0811              | 0.1747              |
| 4534 | Tetralactide repeat protein 7A                            | Q9ULI0  | 0.2800              | 0.4734              | 0.11                | 0.6094              | 0.6002              | -0.26               | 0.0139              | 0.0554              |
| 4535 | Tetralactide repeat protein 7B                            | Q86TV6  | 0.0174              | 0.0771              | 0.17                | 0.3643              | 0.7132              | 0.18                | 0.0142              | 0.0559              |
| 4536 | Tetralactide repeat protein 8                             | Q8TAM2  | 0.3730              | 0.5878              | 0.04                | 0.4548              | 0.7874              | -0.08               | 0.0077              | 0.0415              |
| 4537 | TGF-beta receptor type-1                                  | P36897  | 0.4108              | 0.5041              | -3.31               | 0.5752              | 0.7059              | -1.75               | 0.5661              | 0.6422              |
| 4538 | TGF-beta-activated kinase 1 and MAP3K7-binding protein 3  | Q8NSC8  | 0.0040              | 0.0399              | 0.38                | 0.1191              | 0.6347              | 0.31                | 0.0041              | 0.0323              |
| 4539 | Thimet oligopeptidase                                     | P52888  | 0.0020              | 0.0307              | 0.21                | 0.1444              | 0.6538              | 0.20                | 0.0423              | 0.1116              |
| 4540 | Thioredoxin                                               | P10599  | 0.0139              | 0.0691              | 0.19                | 0.1613              | 0.6642              | 0.11                | 0.0064              | 0.0388              |
| 4541 | Thioredoxin domain-containing protein 12                  | Q95881  | 0.0160              | 0.0737              | -0.62               | 0.2216              | 0.6593              | -0.36               | 0.0131              | 0.0536              |
| 4542 | Thioredoxin domain-containing protein 17                  | Q9BRA2  | 0.0118              | 0.0626              | 0.17                | 0.7441              | 0.8149              | 0.03                | 0.7051              | 0.7517              |
| 4543 | Thioredoxin domain-containing protein 5                   | Q8NB89  | 0.0102              | 0.0587              | 0.20                | 0.3530              | 0.7052              | 0.17                | 0.0039              | 0.0316              |
| 4544 | Thioredoxin domain-containing protein 6                   | Q86XW9  | 0.9825              | 0.9878              | -0.02               | 0.1251              | 0.6422              | -6.09               | 0.0347              | 0.0970              |
| 4545 | Thioredoxin domain-containing protein 8                   | Q6A555  | 0.4108              | 0.5040              | -3.31               | 0.5752              | 0.7057              | -1.75               | 0.5661              | 0.6421              |
| 4546 | Thioredoxin domain-containing protein 9                   | Q14530  | 0.4108              | 0.5039              | -3.31               | 0.5752              | 0.7055              | -1.75               | 0.5661              | 0.6419              |
| 4547 | Thioredoxin reductase 1 cytoplasmic                       | P16881  | 0.5439              | 0.5139              | 0.05                | 0.1054              | 0.6319              | -0.14               | 0.0825              | 0.9070              |
| 4548 | Thioredoxin reductase 2 mitochondrial                     | Q9NNW7  | 0.4108              | 0.5038              | -3.31               | 0.5752              | 0.7054              | -1.75               | 0.5661              | 0.6418              |
| 4549 | Thioredoxin-dependent peroxide reductase mitochondrial    | P30048  | 0.0005              | 0.0176              | 0.26                | 0.3501              | 0.7046              | 0.15                | 0.0022              | 0.0261              |
| 4550 | Thioredoxin-like protein 1                                | O43396  | 0.5308              | 0.6018              | 0.03                | 0.0824              | 0.6168              | 0.20                | 0.0138              | 0.0552              |
| 4551 | Thioredoxin-related transmembrane protein 1               | Q9H3N1  | 0.1027              | 0.2292              | 0.09                | 0.3072              | 0.6774              | 0.19                | 0.0187              | 0.0655              |
| 4552 | Thioredoxin-related transmembrane protein 2               | Q9Y320  | 0.0442              | 0.1336              | -0.61               | 0.0012              | 0.2486              | -0.41               | 0.0000              | 0.0000              |
| 4553 | Thiosulfate sulfurtransferase                             | P16762  | 0.0007              | 0.0196              | 0.60                | 0.0211              | 0.4773              | 0.14                | 0.0215              | 0.0709              |
| 4554 | Thiosulfate:glutathione sulfurtransferase                 | Q8NFU3  | 0.2874              | 0.4838              | -0.06               | 0.0157              | 0.6308              | -0.07               | 0.0067              | 0.0396              |
| 4555 | THO complex subunit 4                                     | Q86V81  | 0.0069              | 0.0494              | -0.21               | 0.2162              | 0.6611              | -0.22               | 0.6088              | 0.6642              |
| 4556 | Threonine-tRNA ligase cytoplasmic                         | P26639  | 0.2348              | 0.4177              | -0.04               | 0.9597              | 0.9225              | 0.00                | 0.0315              | 0.0905              |
| 4557 | Threonylcarbamoyladenosine tRNA methyltransferase         | Q5VV42  | 0.4108              | 0.5037              | -3.31               | 0.5752              | 0.7052              | -1.75               | 0.5661              | 0.6417              |
| 4558 | Thrombospondin type-1 domain-containing protein 4         | Q6ZMP0  | 0.0358              | 0.1182              | 0.20                | 0.4160              | 0.7545              | 0.05                | 0.2605              | 0.4297              |
| 4559 | Thrombospondin-4                                          | P97996  | 0.5034              | 0.5767              | -0.21               | 0.0760              | 0.6013              | -9.00               | 0.6516              | 0.7036              |
| 4560 | Thrombospondin-4                                          | P35443  | 0.5936              | 0.6598              | 0.05                | 0.6109              | 0.7174              | 0.08                | 0.2491              | 0.4156              |
| 4561 | THUMP domain-containing protein 1                         | QXNGX2  | 0.7583              | 0.8034              | -0.05               | 0.3840              | 0.7302              | 0.11                | 0.4687              | 0.8662              |
| 4562 | THUMP domain-containing protein 3                         | Q9BV44  | 0.0834              | 0.1990              | 0.08                | 0.2323              | 0.8732              | -0.01               | 0.5597              | 0.7838              |
| 4563 | Thymidine kinase cytosolic                                | P04183  | 0.0655              | 0.1693              | 0.16                | 0.0513              | 0.5752              | 0.17                | 0.0078              | 0.0419              |
| 4564 | Thymidine kinase                                          | P23919  | 0.0020              | 0.0306              | 0.49                | 0.0118              | 0.4335              | 0.42                | 0.0061              | 0.0380              |
| 4565 | Thymidine synthase                                        | P04818  | 0.1092              | 0.2392              | 0.16                | 0.4145              | 0.7531              | -0.07               | 0.3230              | 0.5107              |
| 4566 | Thymocyte nuclear protein 1                               | Q9P016  | 0.4108              | 0.5035              | -3.31               | 0.5752              | 0.7050              | -1.75               | 0.5661              | 0.6415              |
| 4567 | Thymosin beta-10                                          | P63313  | 0.3578              | 0.5692              | 0.05                | 0.4438              | 0.7795              | -0.05               | 0.1774              | 0.3204              |
| 4568 | Thymosin beta-4                                           | P62328  | 0.0010              | 0.0214              | 0.50                | 0.0159              | 0.4550              | 0.38                | 0.0004              | 0.0235              |
| 4569 | Thyroid hormone receptor-associated protein 3             | Q9Y2W1  | 0.2680              | 0.4598              | 0.08                | 0.0588              | 0.5903              | 0.34                | 0.0004              | 0.0228              |
| 4570 | Thyroid peroxidase                                        | P07202  | 0.0367              | 0.1205              | -0.43               | 0.3760              | 0.7240              | -0.28               | 0.4337              | 0.6441              |
| 4571 | Thyroid receptor-interacting protein 11                   | Q15643  | 0.4949              | 0.5692              | -0.09               | 0.3246              | 0.6857              | -0.19               | 0.8097              | 0.8458              |
| 4572 | Thyroid receptor-interacting protein 6                    | Q15654  | 0.4719              | 0.5478              | -0.02               | 0.1277              | 0.6607              | 0.26                | 0.0616              | 0.1443              |
| 4573 | Thyrotropin-releasing hormone-degrading ectonuclease      | Q9UKU6  | 0.0271              | 0.0998              | -0.18               | 0.5820              | 0.6894              | -0.02               | 0.5144              | 0.7351              |
| 4574 | Tigger transposable element-derived protein 5             | Q53EQ6  | 0.9486              | 0.9614              | 0.00                | 0.2427              | 0.6596              | -0.11               | 0.0005              | 0.0190              |
| 4575 | TIPI4-like protein                                        | Q75663  | 0.0144              | 0.0696              | 2.59                | 0.3211              | 0.6836              | 0.50                | 0.4151              | 0.6218              |
| 4576 | Titin                                                     | Q8WZ42  | 0.0047              | 0.0429              | 0.29                | 0.2007              | 0.6626              | 0.28                | 0.0033              | 0.0307              |
| 4577 | TNF receptor-associated factor 5                          | Q00463  | 0.2714              | 0.4640              | -0.09               | 0.3732              | 0.7208              | -0.25               | 0.2224              | 0.3796              |
| 4578 | TNF receptor-associated factor 6                          | Q9Y4K3  | 0.1023              | 0.2286              | 0.92                | 0.3503              | 0.7044              | 0.45                | 0.1340              | 0.2564              |
| 4579 | TNFAIP3-interacting protein 2                             | Q8NFZ5  | 0.5709              | 0.6386              | -0.14               | 0.5713              | 0.8844              | -0.16               | 0.7522              | 0.7942              |
| 4580 | TOG array regulator of axonemal microtubules protein 2    | Q6ZUX3  | 0.4108              | 0.5034              | -3.31               | 0.5752              | 0.7049              | -1.75               | 0.5661              | 0.6414              |
| 4581 | Toll-interacting protein                                  | Q9H0E2  | 0.2983              | 0.4970              | 0.71                | 0.2991              | 0.6733              | 0.93                | 0.4139              | 0.6202              |
| 4582 | Toll-like receptor 5                                      | Q60602  | 0.4108              | 0.5033              | -3.31               | 0.5752              | 0.7047              | -1.75               | 0.5661              | 0.6412              |
| 4583 | Tonsin-like protein                                       | Q96HA7  | 0.0000              | 0.0000              | -2.62               | 0.2027              | 0.6608              | -2.24               | 0.0005              | 0.0193              |
| 4584 | Torsin-1A                                                 | Q14656  | 0.0019              | 0.0296              | 0.15                | 0.2052              | 0.6594              | 0.18                | 0.5227              | 0.7438              |
| 4585 | Torsin-1A-interacting protein 1                           | Q5TJY8  | 0.1161              | 0.2500              | 0.13                | 0.4214              | 0.7593              | 0.09                | 0.0297              | 0.0875              |
| 4586 | Torsin-1A-interacting protein 2                           | Q8NFQ8  | 0.0070              | 0.0493              | -0.26               | 0.1684              | 0.6603              | -0.15               | 0.0498              | 0.1247              |
| 4587 | Torsin-3A                                                 | Q9H149  | 0.7949              | 0.8337              | 0.05                | 0.2382              | 0.6623              | -0.44               | 0.8452              | 0.8756              |
| 4588 | TP53-regulated inhibitor of apoptosis 1                   | O43715  | 0.0347              | 0.1164              | -0.41               | 0.0940              | 0.6307              | -0.49               | 0.0910              | 0.1901              |
| 4589 | TPR and ankryrin repeat-containing protein 1              | O15050  | 0.0131              | 0.0667              | -0.31               | 0.0811              | 0.6151              | -0.16               | 0.5320              | 0.7529              |
| 4590 | TPST1-like protein                                        | Q56UQ5  | 0.1499              | 0.2993              | 0.06                | 0.2053              | 0.6593              | -0.05               | 0.1174              | 0.2324              |
| 4591 | Tracking protein particle complex subunit 13              | ASPLN9  | 0.4108              | 0.5032              | -3.31               | 0.5752              | 0.7045              | -1.75               | 0.5661              | 0.6411              |
| 4592 | Tracking protein particle complex subunit 2-like protein  | Q9UL33  | 0.0472              | 0.1395              | -0.17               | 0.0504              | 0.5725              | -10.57              | 0.0889              | 0.1873              |
| 4593 | TRAF-type zinc finger domain-containing protein 1         | O14545  | 0.0035              | 0.0378              | -1.35               | 0.2211              | 0.6578              | -0.48               | 0.5254              | 0.7465              |
| 4594 | Trans-acting, T-cell-specific transcription factor GATA-3 | P23771  | 0.1295              | 0.2704              | 0.00                | 0.0989              | 0.9996              | 0.00                | 0.0012              | 0.0173              |
| 4595 | Transaldolase                                             | P78377  | 0.0273              | 0.0999              | 0.24                | 0.1984              | 0.6660              | 0.35                | 0.0095              | 0.0455              |
| 4596 | Transcalabrin-2                                           | T20062  | 0.2498              | 0.4360              | -0.25               | 0.4269              | 0.7625              | -0.18               | 0.5121              | 0.7000              |
| 4597 | Transcription and mRNA export factor ENY2                 | Q9NP88  | 0.0786              | 0.1921              | -0.43               | 0.1833              | 0.6649              | -0.62               | 0.4793              | 0.6986              |
| 4598 | Transcription elongation factor A protein 1               | P23193  | 0.0282              | 0.1020              | 0.15                | 0.3132              | 0.6802              | 0.16                | 0.0141              | 0.0557              |
| 4599 | Transcription elongation factor A protein 2               | O15560  | 0.9678              | 0.9763              | 0.02                | 0.3393              | 0.6988              | -0.50               | 0.0511              | 0.1271              |
| 4600 | Transcription elongation factor A protein 3               | O75764  | 0.4108              | 0.5031              | -3.31               | 0.5752              | 0.7044              | -1.75               | 0.5661              | 0.6410              |
| 4601 | Transcription elongation factor A protein-like 1          | Q15170  | 0.1028              | 0.2293              | 0.33                | 0.1211              | 0.6619              | 0.24                | 0.0670              | 0.1522              |
| 4602 | Transcription elongation factor A protein-like 2          | Q9H3H9  | 0.0414              | 0.1288              | 0.25                | 0.1266              | 0.6598              | 0.17                | 0.4495              | 0.6632              |
| 4603 | Transcription elongation factor A protein-like 4          | Q96E15  | 0.7101              | 0.7617              | -0.02               | 0.4382              | 0.7744              | -0.03               | 0.0861              | 0.1829              |
| 4604 | Transcription elongation factor A protein-like 5          | Q5H9L2  | 0.0335              | 0.1142              | -0.36               | 0.4454              | 0.7816              | -0.08               | 0.1050              | 0.0575              |
| 4605 | Transcription elongation factor SPT5                      | O00267  | 0.8629              | 0.8915              | 0.01                | 0.5621              | 0.8760              | 0.10                | 0.0161              | 0.0599              |
| 4606 | Transcription elongation regulator 1                      | O14776  | 0.0372              | 0.1212              | 0.17                | 0.3606              | 0.6954              | 0.11                | 0.0268              | 0.0820              |
| 4607 | Transcription factor 15                                   | O12870  | 0.0017              | 0.0278              | 1.13                | 0.1132              | 0.6346              | 0.45                | 0.0368              | 0.1007              |

Supplementary Table S2. Overview on all relatively quantified 5180 proteins statistical analysis

| Protein name | UniProt                                                | MCF-7               |                     |                     |                     | MDA-MB-231          |                     |                     |                     |            |        |        |        |       |        |        |       |        |        |       |        |        |       |        |        |       |        |        |       |
|--------------|--------------------------------------------------------|---------------------|---------------------|---------------------|---------------------|---------------------|---------------------|---------------------|---------------------|------------|--------|--------|--------|-------|--------|--------|-------|--------|--------|-------|--------|--------|-------|--------|--------|-------|--------|--------|-------|
|              |                                                        | Dai SC20 vs control | Gen SC20 vs control | SSE SC20 vs control | Dai IC20 vs control | Gen IC20 vs control | SSE IC20 vs control | Dai IC20 vs control | Gen IC20 vs control |            |        |        |        |       |        |        |       |        |        |       |        |        |       |        |        |       |        |        |       |
| p value      | BH q value                                             | log2FC              | p value             | BH q value          | log2FC              | p value             | BH q value          | log2FC              | p value             | BH q value | log2FC |        |        |       |        |        |       |        |        |       |        |        |       |        |        |       |        |        |       |
| 4608         | Transcription factor 20                                | Q9UGU0              | 0.4108              | 0.5029              | -3.31               | 0.5752              | 0.7042              | -1.75               | 0.5661              | 0.6408     | -1.19  | 0.5388 | 0.6063 | 0.89  | 0.2938 | 0.4044 | -1.88 | 0.9510 | 0.9831 | 0.09  | 0.0559 | 0.1874 | -0.22 | 0.9822 | 0.9873 | 0.00  | 0.1576 | 0.2214 | 0.21  |
| 4609         | Transcription factor 25                                | Q9B070              | 0.0302              | 0.1069              | 0.16                | 0.2413              | 0.6606              | 0.22                | 0.0094              | 0.0452     | -0.24  | 0.1135 | 0.2138 | 0.10  | 0.8013 | 0.8450 | 0.01  | 0.1642 | 0.3273 | 0.09  | 0.3736 | 0.5110 | -2.55 | 0.8708 | 1.0537 | -0.33 | 0.0651 | 0.1460 | 0.26  |
| 4610         | Transcription factor 7                                 | P36402              | 0.4108              | 0.5028              | -3.31               | 0.5752              | 0.7040              | -1.75               | 0.5661              | 0.6407     | -0.19  | 0.5388 | 0.6062 | 0.89  | 0.2938 | 0.4043 | -1.88 | 0.9510 | 0.9829 | 0.09  | 0.0132 | 0.1087 | 0.42  | 0.0001 | 0.0118 | 1.62  | 0.0691 | 0.1166 | 0.24  |
| 4611         | Transcription factor 7-like 2                          | Q9NQB0              | 0.1075              | 0.2360              | 0.16                | 0.2204              | 0.6592              | 0.14                | 0.8451              | 0.8759     | -0.01  | 0.0074 | 0.0348 | 0.30  | 0.0256 | 0.1153 | 0.12  | 0.0238 | 0.0989 | 0.15  | 0.3736 | 0.5886 | -2.55 | 0.8708 | 1.1927 | -0.33 | 0.0651 | 0.1862 | 0.26  |
| 4612         | Transcription factor A mitochondrial                   | Q90059              | 0.7019              | 0.7554              | 0.03                | 0.2912              | 0.6602              | 0.17                | 0.8558              | 0.8852     | -0.01  | 0.1710 | 0.2910 | 0.12  | 0.7504 | 0.8049 | 0.02  | 0.1403 | 0.2940 | 0.14  | 0.0425 | 0.1672 | 0.42  | 0.1078 | 0.3344 | 0.09  | 0.0198 | 0.1217 | 0.16  |
| 4613         | Transcription factor BTF3                              | P20290              | 0.2467              | 0.4326              | -0.15               | 0.5366              | 0.8521              | -0.18               | 0.7914              | 0.8290     | 0.03   | 0.8140 | 0.8398 | 0.02  | 0.0560 | 0.1768 | -0.33 | 0.9797 | 0.9839 | 0.00  | 0.7267 | 0.7660 | 0.09  | 0.7989 | 1.2431 | 0.05  | 0.5559 | 0.6205 | 0.12  |
| 4614         | Transcription factor BTF3 homolog 4                    | Q9K617              | 0.4108              | 0.5027              | -3.31               | 0.5752              | 0.7039              | -1.75               | 0.5661              | 0.6405     | -0.19  | 0.5388 | 0.6061 | 0.89  | 0.2938 | 0.4042 | -1.88 | 0.9510 | 0.9827 | 0.09  | 0.0619 | 0.1958 | -0.83 | 0.9859 | 0.9899 | 0.01  | 0.7571 | 0.7999 | -0.09 |
| 4615         | Transcription factor E2F8                              | ADAVK6              | 0.4108              | 0.5026              | -3.31               | 0.5752              | 0.7037              | -1.75               | 0.5661              | 0.6404     | -0.19  | 0.5388 | 0.6059 | 0.89  | 0.2938 | 0.4041 | -1.88 | 0.9510 | 0.9825 | 0.09  | 0.0392 | 0.1638 | -0.86 | 0.0003 | 0.0175 | -0.75 | 0.1475 | 0.2098 | -0.37 |
| 4616         | Transcription factor ETV7                              | Q9Y603              | 0.4633              | 0.5402              | 0.04                | 0.3762              | 0.7239              | 0.13                | 0.0133              | 0.0538     | 0.23   | 0.0443 | 0.1056 | -0.15 | 0.0218 | 0.1062 | 0.24  | 0.1070 | 0.2450 | 0.11  | 0.3736 | 0.5315 | -2.55 | 0.8708 | 1.0909 | -0.33 | 0.0651 | 0.1558 | 0.26  |
| 4617         | Transcription factor HIVEP2                            | P31629              | 0.3897              | 0.6064              | -0.21               | 0.4094              | 0.7504              | -0.21               | 0.9342              | 0.9490     | 0.02   | 0.1879 | 0.3156 | -0.36 | 0.5996 | 0.6753 | -0.12 | 0.6667 | 0.9048 | 0.10  | 0.3736 | 0.4467 | -2.55 | 0.8708 | 0.9347 | -0.33 | 0.0651 | 0.1182 | 0.26  |
| 4618         | Transcription factor HIVEP3                            | Q5T1R4              | 0.0005              | 0.0175              | -0.25               | 0.2298              | 0.6613              | -0.31               | 0.0003              | 0.0199     | -0.39  | 0.0011 | 0.0163 | -2.26 | 0.6144 | 0.6883 | -0.08 | 0.0028 | 0.0541 | -2.17 | 0.3736 | 0.6395 | -2.55 | 0.8708 | 1.2815 | -0.33 | 0.0651 | 0.2177 | 0.26  |
| 4619         | Transcription factor jun-D                             | P17535              | 0.0370              | 0.1209              | -0.64               | 0.1962              | 0.6691              | -0.89               | 0.1295              | 0.2503     | -0.47  | 0.0374 | 0.0937 | -0.45 | 0.5904 | 0.6673 | -0.09 | 0.1655 | 0.3290 | -0.22 | 0.3736 | 0.5104 | -2.55 | 0.8708 | 1.0524 | -0.33 | 0.0651 | 0.1457 | 0.26  |
| 4620         | Transcription factor p65                               | Q04206              | 0.6518              | 0.7128              | 0.07                | 0.7674              | 0.8311              | -0.09               | 0.1124              | 0.2242     | 0.33   | 0.8918 | 0.9077 | 0.03  | 0.0690 | 0.2001 | 0.45  | 0.7876 | 1.0256 | 0.06  | 0.0012 | 0.0454 | 1.17  | 0.0071 | 0.0694 | 0.59  | 0.0033 | 0.0576 | 0.94  |
| 4621         | Transcription factor RelB                              | Q01201              | 0.7559              | 0.8014              | -0.02               | 0.0852              | 0.6199              | -0.12               | 0.0002              | 0.0199     | 0.71   | 0.0035 | 0.0240 | 0.44  | 0.0039 | 0.0465 | -0.40 | 0.0029 | 0.0556 | 0.73  | 0.3736 | 0.6391 | -2.55 | 0.8708 | 1.2807 | -0.33 | 0.0651 | 0.2174 | 0.26  |
| 4622         | Transcription factor Sp1                               | P08047              | 0.0877              | 0.2061              | -0.32               | 0.4314              | 0.7674              | -0.26               | 0.5571              | 0.7812     | 0.10   | 0.7583 | 0.7913 | -0.05 | 0.9674 | 0.9744 | -0.01 | 0.0821 | 0.2063 | -0.33 | 0.3736 | 0.5425 | -2.55 | 0.8708 | 1.1107 | -0.33 | 0.0651 | 0.1613 | 0.26  |
| 4623         | Transcription factor TFIIB component B' homolog        | A6H8Y1              | 0.0000              | 0.0000              | 0.91                | 0.0014              | 0.2339              | 0.34                | 0.0031              | 0.0306     | 0.25   | 0.0011 | 0.0159 | 0.25  | 0.0000 | 0.0000 | 0.68  | 0.0192 | 0.0890 | 0.12  | 0.9378 | 0.9488 | 0.01  | 0.7682 | 1.2110 | 0.02  | 0.0021 | 0.0508 | 0.40  |
| 4624         | Transcription initiation factor IIB                    | Q00403              | 0.4108              | 0.5025              | -3.31               | 0.5752              | 0.7036              | -1.75               | 0.5661              | 0.6403     | -0.19  | 0.5388 | 0.6058 | 0.89  | 0.2938 | 0.4040 | -1.88 | 0.9510 | 0.9823 | 0.09  | 0.2869 | 0.5381 | 0.17  | 0.0094 | 0.0796 | -0.50 | 0.1178 | 0.1759 | -0.34 |
| 4625         | Transcription initiation factor TFIIH subunit 11       | Q15544              | 0.4108              | 0.5023              | -3.31               | 0.5752              | 0.7034              | -1.75               | 0.5661              | 0.6401     | -0.19  | 0.5388 | 0.6057 | 0.89  | 0.2938 | 0.4039 | -1.88 | 0.9510 | 0.9821 | 0.09  | 0.3718 | 0.6540 | 0.88  | 0.1864 | 0.4766 | 1.49  | 0.1122 | 0.1695 | 1.92  |
| 4626         | Transcription intermediary factor 1-alpha              | O15164              | 0.1264              | 0.2652              | -0.58               | 0.2761              | 0.6649              | -0.41               | 0.1421              | 0.1866     | 0.13   | 0.3182 | 0.4885 | -0.37 | 0.0386 | 0.1433 | -0.22 | 0.1925 | 0.3666 | -0.49 | 0.3736 | 0.5042 | -2.55 | 0.8708 | 1.0413 | -0.33 | 0.0651 | 0.1428 | 0.26  |
| 4627         | Transcription intermediary factor 1-beta               | I31263              | 0.0053              | 0.0442              | 0.18                | 0.5229              | 0.8420              | 0.10                | 0.0014              | 0.0220     | 0.33   | 0.0359 | 0.0910 | 0.12  | 0.1109 | 0.2715 | -0.37 | 0.0053 | 0.0611 | 0.27  | 0.0591 | 0.1930 | 0.24  | 0.8272 | 1.2711 | 0.01  | 0.4270 | 0.4932 | 0.04  |
| 4628         | Transcription termination factor 1 mitochondrial       | Q9NS51              | 0.9901              | 0.9920              | 0.01                | 0.0189              | 0.4640              | -0.40               | 0.0465              | 0.1194     | -0.26  | 0.0017 | 0.0180 | -0.72 | 0.0319 | 0.1306 | -0.30 | 0.3405 | 0.5447 | 0.60  | 0.0166 | 0.0521 | 0.81  | 0.0015 | 0.0317 | 1.40  | 0.1522 | 0.2153 | 0.34  |
| 4629         | Transcription termination factor 4 mitochondrial       | Q7Z6M4              | 0.0222              | 0.0888              | 0.35                | 0.1541              | 0.6602              | 0.22                | 0.0862              | 0.1830     | 0.23   | 0.4073 | 0.5984 | -0.11 | 0.2945 | 0.3925 | -0.12 | 0.6871 | 0.9269 | -0.04 | 0.3736 | 0.4457 | -2.55 | 0.8708 | 0.9257 | -0.33 | 0.0651 | 0.1177 | 0.26  |
| 4630         | Transcriptional activator protein Pur-beta             | Q960R8              | 0.1229              | 0.2603              | -0.07               | 0.5958              | 0.7001              | -0.07               | 0.3270              | 0.5159     | 0.03   | 0.0932 | 0.1838 | -0.12 | 0.0014 | 0.0287 | -0.18 | 0.0708 | 0.1873 | 0.05  | 0.0642 | 0.1994 | 0.21  | 0.0374 | 0.176  | -0.29 | 0.3939 | 0.6121 | -0.28 |
| 4631         | Transcriptional adapter 2-alpha                        | Q75478              | 0.4108              | 0.5022              | -3.31               | 0.5752              | 0.7032              | -1.75               | 0.5661              | 0.6400     | -0.19  | 0.5388 | 0.6056 | 0.89  | 0.2938 | 0.4038 | -1.88 | 0.9510 | 0.9819 | 0.09  | 0.6629 | 0.7071 | 0.12  | 0.0414 | 0.1871 | -0.61 | 0.0785 | 0.1738 | -0.07 |
| 4632         | Transcriptional coactivator YAP1                       | P46937              | 0.0009              | 0.0210              | -1.22               | 0.3180              | 0.6810              | -0.49               | 0.2505              | 0.4175     | -0.63  | 0.0027 | 0.0216 | -1.09 | 0.4659 | 0.5575 | 0.09  | 0.0035 | 0.0589 | -1.18 | 0.0232 | 0.1364 | -0.28 | 0.0102 | 0.0832 | -0.51 | 0.0064 | 0.0753 | -0.55 |
| 4633         | Transcriptional regulator ERG                          | P11308              | 0.0003              | 0.0140              | 0.01                | 0.0063              | 0.5950              | 1.06                | 0.0000              | 0.0000     | -1.22  | 0.0001 | 0.0167 | -1.47 | 0.0381 | 0.1424 | 0.14  | 0.0001 | 0.0259 | 1.29  | 0.3736 | 0.6549 | -2.55 | 0.8708 | 1.3078 | -0.33 | 0.0651 | 0.2282 | 0.26  |
| 4634         | Transcriptional repressor CTCFL                        | Q8N151              | 0.4108              | 0.5021              | -3.31               | 0.5752              | 0.7031              | -1.75               | 0.5661              | 0.6398     | -0.19  | 0.5388 | 0.6054 | 0.89  | 0.2938 | 0.4037 | -1.88 | 0.9510 | 0.9817 | 0.09  | 0.0297 | 0.1468 | -0.34 | 0.0379 | 0.1773 | -0.37 | 0.0360 | 0.1622 | -0.23 |
| 4635         | Transcriptional repressor p66-alpha                    | Q86YPA              | 0.0475              | 0.1400              | -0.07               | 0.0450              | 0.5644              | -0.07               | 0.0662              | 0.1509     | 0.07   | 0.4167 | 0.6089 | -0.04 | 0.0012 | 0.0268 | -0.27 | 0.1812 | 0.0874 | -0.14 | 0.9496 | 0.9509 | 0.01  | 0.8904 | 0.9177 | -0.02 | 0.1656 | 0.2308 | 0.29  |
| 4636         | Transcriptional repressor p66-beta                     | Q8WX19              | 0.1371              | 0.2819              | 0.09                | 0.7818              | 0.8428              | 0.05                | 0.5025              | 0.7249     | 0.06   | 0.0374 | 0.0936 | 0.16  | 0.6542 | 0.7209 | -0.02 | 0.0611 | 0.1715 | 0.12  | 0.0204 | 0.1323 | 0.45  | 0.6628 | 1.1015 | 0.04  | 0.1023 | 0.1582 | 0.20  |
| 4637         | Transcriptional repressor protein YY1                  | P25490              | 0.1052              | 0.2326              | 0.25                | 0.2258              | 0.6593              | 0.19                | 0.0686              | 0.1549     | 0.30   | 0.1475 | 0.2616 | 0.21  | 0.9094 | 0.9319 | 0.01  | 0.3895 | 0.6012 | 0.11  | 0.7788 | 0.8130 | -0.04 | 0.7047 | 1.1465 | 0.06  | 0.8499 | 0.8787 | -0.03 |
| 4638         | Transducin beta-like protein 2                         | Q9Y4P3              | 0.0072              | 0.0499              | 0.14                | 0.3847              | 0.7302              | 0.11                | 0.0007              | 0.0203     | 0.33   | 0.2115 | 0.3478 | 0.05  | 0.6589 | 0.7243 | -0.02 | 0.0092 | 0.0687 | 0.18  | 0.1683 | 0.3634 | -0.20 | 0.0727 | 0.2613 | 0.30  | 0.5339 | 0.5999 | -0.09 |
| 4639         | Transferrin receptor protein 1                         | P02786              | 0.0066              | 0.0487              | 0.39                | 0.6146              | 0.7151              | 0.08                | 0.0037              | 0.0315     | 0.34   | 0.0015 | 0.0177 | 0.50  | 0.9668 | 0.9739 | 0.00  | 0.0071 | 0.0643 | 0.46  | 0.0774 | 0.2216 | 0.25  | 0.7881 | 0.6154 | 0.11  | 0.5706 | 0.6341 | 0.05  |
| 4640         | Transferrin receptor protein 2                         | Q9UP52              | 0.0026              | 0.0338              | -0.35               | 0.7931              | 0.8507              | 0.03                | 0.1298              | 0.2506     | -0.08  | 0.4275 | 0.6194 | 0.03  | 0.0320 | 0.1304 | -0.25 | 0.0111 | 0.0722 | -0.23 | 0.3736 | 0.6105 | -2.55 | 0.8708 | 1.2311 | -0.33 | 0.0651 | 0.1992 | 0.26  |
| 4641         | Transformation/transcription domain-associated protein | Q9Y4A5              | 0.4108              | 0.5020              | -3.31               | 0.5752              | 0.7029              | -1.75               | 0.5661              | 0.6397     | -0.19  | 0.5388 | 0.6053 | 0.89  | 0.2938 | 0.4036 | -1.88 | 0.9510 | 0.9815 | 0.09  | 0.0998 | 0.2555 | -0.12 | 0.0453 | 0.1977 | 0.16  | 0.2027 | 0.2711 | 0.15  |
| 4642         | Transformer-2 protein homolog alpha                    | P13595              | 0.4108              | 0.5019              | -3.31               | 0.5752              | 0.7027              | -1.75               | 0.5661              | 0.6396     | -0.19  | 0.5388 | 0.6052 | 0.89  | 0.2938 | 0.4035 | -1.88 | 0.9510 | 0.9813 | 0.09  | 0.4692 | 0.5243 | 0.06  | 0.0033 | 0.1648 | 0.30  | 0.3324 | 0.4035 | 0.09  |
| 4643         | Transformer-2 protein homolog beta                     | P62995              | 0.0034              | 0.0377              | -0.19               | 0.2457              | 0.6584              | -0.11               | 0.0104              | 0.2922     | -0.01  | 0.0016 | 0.0176 | -0.24 | 0.0005 | 0.0189 | -0.32 | 0.0409 | 0.1331 | -0.21 | 0.0039 | 0.0673 | 0.59  | 0.0002 | 0.0179 | 0.66  | 0.0022 | 0.0525 | 0.49  |
| 4644         | Transforming acidic coiled-coil-containing protein 3   | P1Y6A5              | 0.0421              | 0.1300              | -0.35               | 0.0053              | 0.3761              | -0.71               | 0.1309              | 0.2521     | -0.25  | 0.0097 | 0.0395 | -0.56 | 0.0072 | 0.0619 | -0.74 | 0.0086 | 0.0681 | -0.96 | 0.0662 | 0.2495 | 0.39  | 0.0911 | 0.3002 | 0.39  | 0.1669 | 0.2322 | 0.29  |
| 4645         | Transforming growth factor beta 1 protein              | Q91137              | 0.4108              | 0.5018              | -3.31               | 0.5752              | 0.7026              | -1.75               | 0.5661              | 0.6394     | -0.19  | 0.5388 | 0.6049 | 0.89  | 0.2938 | 0.4034 | -1.88 | 0.9510 | 0.9811 | 0.09  | 0.0027 | 0.1678 | 0.56  | 0.0132 |        |       |        |        |       |

Supplementary Table S2. Overview on all relatively quantified 5180 proteins statistical analysis

|                                                             |         | MCF-7               |            |                     |         | MDA-MB-231          |        |                     |            |
|-------------------------------------------------------------|---------|---------------------|------------|---------------------|---------|---------------------|--------|---------------------|------------|
|                                                             |         | Dai SC20 vs control |            | Gen SC20 vs control |         | Dai IC20 vs control |        | Gen IC20 vs control |            |
| Protein name                                                | UniProt | p value             | BH q value | log2FC              | p value | BH q value          | log2FC | p value             | BH q value |
| 4688 Transmembrane protein 135                              | Q86B99  | 0.0089              | 0.0558     | 0.19                | 0.5223  | 0.8413              | 0.10   | 0.0040              | 0.0319     |
| 4689 Transmembrane protein 151A                             | Q8N4L1  | 0.4108              | 0.5010     | -3.31               | 0.5752  | 0.7016              | -1.75  | 0.5661              | 0.6386     |
| 4690 Transmembrane protein 165                              | Q9HC07  | 0.0152              | 0.0713     | -0.24               | 0.3987  | 0.7426              | -0.09  | 0.0121              | 0.0614     |
| 4691 Transmembrane protein 186                              | Q96B77  | 0.0059              | 0.0464     | 0.16                | 0.8240  | 0.8739              | 0.02   | 0.4110              | 0.6171     |
| 4692 Transmembrane protein 192                              | Q8H195  | 0.3626              | 0.5753     | -0.11               | 0.8392  | 0.8846              | -0.01  | 0.7890              | 0.8270     |
| 4693 Transmembrane protein 205                              | Q6UW68  | 0.2444              | 0.4299     | -0.10               | 0.4925  | 0.8151              | 0.12   | 0.8750              | 0.9009     |
| 4694 Transmembrane protein 40                               | Q87008  | 0.0063              | 0.0255     | 0.31                | 0.9304  | 0.9145              | 0.11   | 0.0084              | 0.0345     |
| 4695 Transmembrane protein 43                               | Q8WVA1  | 0.4108              | 0.5009     | -3.31               | 0.5752  | 0.7014              | -1.75  | 0.5661              | 0.6384     |
| 4696 Transmembrane protein 43                               | Q9BTU4  | 0.0498              | 0.1438     | 0.21                | 0.4791  | 0.8047              | 0.04   | 0.0294              | 0.0871     |
| 4697 Transmembrane protein 87A                              | Q8NB33  | 0.4108              | 0.4951     | -0.12               | 0.0737  | 0.6128              | 0.34   | 0.1214              | 0.2389     |
| 4698 Transmembrane protein KIAA1109                         | Q2LD37  | 0.4108              | 0.5008     | -3.31               | 0.5752  | 0.7012              | -1.75  | 0.5661              | 0.6383     |
| 4699 Transport and Golgi organization protein 1 homolog     | Q5JRA6  | 0.7720              | 0.8150     | -0.01               | 0.9701  | 0.9797              | -0.00  | 0.0532              | 0.1305     |
| 4700 Transportin-1                                          | Q92973  | 0.2494              | 0.4336     | 0.03                | 0.0615  | 0.5932              | 0.09   | 0.0110              | 0.0487     |
| 4701 Transportin-2                                          | O14787  | 0.0076              | 0.0513     | -1.74               | 0.1287  | 0.6429              | -1.27  | 0.0037              | 0.0319     |
| 4702 Transportin-3                                          | Q9YSL0  | 0.4108              | 0.5007     | -3.31               | 0.5752  | 0.7011              | -1.75  | 0.5661              | 0.6382     |
| 4703 Treacle protein                                        | Q13428  | 0.0000              | 0.0000     | -1.71               | 0.3019  | 0.6752              | -1.07  | 0.1632              | 0.2990     |
| 4704 Trefol factor 2                                        | Q03403  | 0.0060              | 0.0465     | 0.35                | 0.0190  | 0.4642              | 0.42   | 0.0183              | 0.0649     |
| 4705 Treslin                                                | Q72221  | 0.0002              | 0.0119     | 0.59                | 0.1202  | 0.6366              | 0.37   | 0.0005              | 0.0201     |
| 4706 Trichoxylate transport protein mitochondrial           | P53007  | 0.0048              | 0.0428     | 0.36                | 0.3434  | 0.7006              | -0.17  | 0.0032              | 0.0302     |
| 4707 Trichostatin A                                         | O07283  | 0.0001              | 0.0091     | -0.88               | 0.0545  | 0.5881              | -0.84  | 0.0066              | 0.0393     |
| 4708 Trifunctional enzyme subunit alpha mitochondrial       | P40939  | 0.0060              | 0.0465     | 0.17                | 0.3364  | 0.6954              | 0.06   | 0.0048              | 0.0336     |
| 4709 Trifunctional enzyme subunit beta mitochondrial        | P55084  | 0.1316              | 0.2734     | 0.08                | 0.3068  | 0.6783              | 0.14   | 0.0476              | 0.1210     |
| 4710 Trifunctional purine biosynthetic protein adenosine-3  | P22102  | 0.0049              | 0.0854     | 0.22                | 0.1797  | 0.6649              | 0.20   | 0.0059              | 0.0339     |
| 4711 Trimucleotide repeat-containing gene 18 protein        | G15417  | 0.0162              | 0.0741     | 0.18                | 0.0421  | 0.0465              | 0.30   | 0.0023              | 0.0206     |
| 4712 Trimucleotide repeat-containing gene 6A protein        | Q8HNV7  | 0.0060              | 0.0421     | 0.52                | 0.7572  | 0.7009              | -1.75  | 0.1499              | 0.1965     |
| 4713 TRIO E3 ubiquitin-binding protein                      | Q9H246  | 0.4108              | 0.5005     | -3.31               | 0.5752  | 0.7007              | -1.75  | 0.5661              | 0.6379     |
| 4714 Triokinase/TMN cyclase                                 | Q13123  | 0.6590              | 0.7194     | 0.01                | 0.3687  | 0.7169              | 0.08   | 0.2768              | 0.4509     |
| 4715 Triosephosphate isomerase                              | P60174  | 0.0001              | 0.0089     | 0.52                | 0.1106  | 0.6323              | 0.35   | 0.0011              | 0.0218     |
| 4716 Tripartite motif-containing protein 10                 | Q1UDY6  | 0.7049              | 0.7572     | 0.07                | 0.6855  | 0.7706              | -0.06  | 0.0458              | 0.1179     |
| 4717 Tripartite motif-containing protein 16-like protein    | Q309B1  | 0.1032              | 0.2297     | -0.56               | 0.2741  | 0.6647              | -0.53  | 0.6644              | 0.7157     |
| 4718 Tripartite motif-containing protein 29                 | Q14134  | 0.0305              | -3.31      | 0.5752              | 0.7006  | -1.75               | 0.5661 | 0.6378              | -1.19      |
| 4719 Tripartite motif-containing protein 34                 | Q9BYJ4  | 0.4108              | 0.5002     | -3.31               | 0.5752  | 0.7004              | -1.75  | 0.5661              | 0.6376     |
| 4720 Tripartite motif-containing protein 42                 | Q8IWZ5  | 0.2552              | 0.4432     | 0.05                | 0.2677  | 0.6635              | -0.13  | 0.0733              | 0.1618     |
| 4721 Tripartite motif-containing protein 45                 | Q9H1W5  | 0.4108              | 0.5001     | -3.31               | 0.5752  | 0.7002              | -1.75  | 0.5661              | 0.6375     |
| 4722 Tripartite motif-containing protein 51                 | Q9BSJ1  | 0.3952              | 0.6133     | 0.13                | 0.2753  | 0.6645              | 0.15   | 0.0147              | 0.0572     |
| 4723 Tripartite motif-containing protein 52                 | Q96A61  | 0.1302              | 0.2717     | 0.11                | 0.0796  | 0.6127              | 0.16   | 0.0620              | 0.1447     |
| 4724 Tripartite motif-containing protein 55                 | Q9BYV6  | 0.1740              | 0.3354     | 0.07                | 0.0879  | 0.6212              | -0.25  | 0.0670              | 0.1522     |
| 4725 Tripartite motif-containing protein 77                 | HYAP6   | 0.4108              | 0.5000     | -3.31               | 0.5752  | 0.7001              | -1.75  | 0.5661              | 0.6373     |
| 4726 tRNA (cytosine(34)-C)-methyltransferase                | Q80K23  | 0.0030              | 0.0359     | 0.22                | 0.1224  | 0.6398              | 0.09   | 0.0017              | 0.0238     |
| 4727 tRNA (guanine(10-N2)-methyltransferase homolog         | Q72Z44  | 0.0444              | 0.1340     | 1.18                | 0.6970  | 0.7768              | 0.21   | 0.9662              | 0.9724     |
| 4728 tRNA-methyltransferase 10 homolog                      | Q7U103  | 0.3251              | 0.5307     | 0.06                | 0.1578  | 0.6619              | -0.13  | 0.0585              | 0.1391     |
| 4729 tRNA pseudouridine synthase A                          | Q9Y406  | 0.0062              | 0.0424     | 0.22                | 0.0562  | 0.0623              | 0.20   | 0.0066              | 0.0336     |
| 4730 tRNA-pseudouridine synthetase protein 1                | A2RUC4  | 0.4108              | 0.4999     | -3.31               | 0.5752  | 0.6999              | -1.75  | 0.5619              | 0.6372     |
| 4731 tRNA-adenylsuccinylase(20) synthase [NAD(P)+]-like     | Q9NXC4  | 0.0599              | 0.1619     | -0.19               | 0.8026  | 0.8574              | 0.02   | 0.0311              | 0.0534     |
| 4732 tRNA-dihydroxydipicolinate(20) synthase [NAD(P)+]-like | Q95620  | 0.6275              | 0.6901     | 0.29                | 0.6759  | 0.7628              | -0.85  | 0.8830              | 0.9072     |
| 4733 tRNA-specific adenosine decaminase 1                   | Q9UBU4  | 0.2997              | 0.4987     | -0.06               | 0.3085  | 0.6783              | -0.09  | 0.9546              | 0.9641     |
| 4734 tRNA-splicing endonuclease subunit Sen15               | Q8WW01  | 0.0247              | 0.0948     | -0.19               | 0.0184  | 0.6649              | -0.19  | 0.0018              | 0.0245     |
| 4735 tRNA-splicing ligase RtcH homolog                      | Q9Y330  | 0.1348              | 0.2784     | 0.37                | 0.2143  | 0.6619              | -0.11  | 0.1305              | 0.2515     |
| 4736 Trophoblast glycoprotein                               | Q13641  | 0.0217              | 0.0875     | 0.16                | 0.7390  | 0.8508              | 0.05   | 0.2350              | 0.3959     |
| 4737 Tropomodulin-2                                         | Q9NZR1  | 0.0632              | 0.1664     | 0.30                | 0.2634  | 0.6633              | 0.59   | 0.0192              | 0.0665     |
| 4738 Tropomodulin-3                                         | Q9NYL9  | 0.0063              | 0.0475     | 0.09                | 0.3158  | 0.6810              | 0.07   | 0.9253              | 0.9418     |
| 4739 Tropomyosin-4                                          | Q9NZQ9  | 0.0264              | 0.6227     | -0.29               | 0.2684  | 0.6713              | -0.54  | 0.1734              | 0.3151     |
| 4740 Tropomyosin alpha-1 chain                              | P09493  | 0.6771              | 0.7342     | 0.28                | 0.5899  | 0.7088              | 0.85   | 0.3892              | 0.5905     |
| 4741 Tropomyosin alpha-3 chain                              | P06753  | 0.1962              | 0.3651     | 0.08                | 0.3241  | 0.6855              | 0.20   | 0.0174              | 0.0629     |
| 4742 Tropomyosin alpha-4 chain                              | P67936  | 0.5053              | 0.5784     | 0.02                | 0.4140  | 0.7527              | 0.12   | 0.0277              | 0.0838     |
| 4743 Tropomyosin beta chain                                 | P07951  | 0.0095              | 0.0572     | -0.26               | 0.2076  | 0.6589              | 0.07   | 0.3564              | 0.5526     |
| 4744 Tropom C skeletal-associated factor                    | P02585  | 0.0013              | 0.0243     | 0.30                | 0.0234  | 0.4829              | 0.18   | 0.0038              | 0.0323     |
| 4745 TRPM channel-associated factor 1                       | Q9Y452  | 0.0060              | 0.0466     | 0.09                | 0.2836  | 0.6641              | -0.11  | 0.4305              | 0.4956     |
| 4746 Trypanothione S-hydroxylase 1                          | P17752  | 0.0813              | 0.1965     | -0.08               | 0.0411  | 0.5692              | -0.13  | 0.2317              | 0.4187     |
| 4747 Trypanothione S-hydroxylase 2                          | Q8IWIU  | 0.4108              | 0.4974     | -0.02               | 0.8417  | 0.8067              | 0.04   | 0.1258              | 0.2453     |
| 4748 Trypanothione-5 lyase cytoplasmic                      | P23381  | 0.0004              | 0.0159     | 0.33                | 0.1656  | 0.6619              | 0.23   | 0.0007              | 0.0206     |
| 4749 Trypanothione-5 lyase mitochondrial                    | Q9UGM6  | 0.4108              | 0.4998     | -3.31               | 0.5752  | 0.6998              | -1.75  | 0.5661              | 0.6371     |
| 4750 Ubiquitin-related protein 1                            | O0D924  | 0.0001              | 0.0088     | 0.80                | 0.0511  | 0.6316              | 0.53   | 0.0007              | 0.0210     |
| 4751 Ube2A                                                  | P49815  | 0.0384              | 0.1230     | 0.31                | 0.1412  | 0.6531              | 0.29   | 0.0052              | 0.0353     |
| 4752 Ube2B                                                  | A6NHL2  | 0.0961              | 0.2188     | 0.18                | 0.0613  | 0.5935              | -0.23  | 0.0009              | 0.0218     |
| 4753 Ube2C                                                  | Q7U136  | 0.4108              | 0.4996     | -3.31               | 0.5752  | 0.6996              | -1.75  | 0.5661              | 0.6369     |
| 4754 Ube2D                                                  | Q9BOE3  | 0.0008              | 0.0202     | 0.34                | 0.1754  | 0.6613              | 0.26   | 0.0006              | 0.0194     |
| 4755 Ube2E                                                  | P0DPH7  | 0.1217              | 0.2582     | -3.15               | 0.8655  | 0.9030              | -0.21  | 0.0307              | 0.0893     |
| 4756 Ube2F                                                  | P68366  | 0.0263              | 0.0627     | 0.37                | 0.5466  | 0.8220              | -0.05  | 0.0325              | 0.0926     |
| 4757 Ube2G                                                  | Q9NY65  | 0.0554              | 0.1540     | 0.23                | 0.3084  | 0.6783              | 0.14   | 0.8451              | 0.8757     |
| 4758 Ube2H                                                  | P07437  | 0.0137              | 0.0684     | 0.22                | 0.1345  | 0.6493              | 0.10   | 0.0041              | 0.0323     |
| 4759 Ube2I                                                  | Q9I4B7  | 0.0645              | 0.1681     | -0.10               | 0.3741  | 0.7215              | -0.03  | 0.1567              | 0.2894     |
| 4760 Ube2J                                                  | Q13885  | 0.1182              | 0.2529     | -0.12               | 0.6920  | 0.7744              | -0.04  | 0.0150              | 0.0574     |
| 4761 Ube2K                                                  | Q13509  | 0.0005              | 0.0174     | 0.35                | 0.0209  | 0.4748              | 0.36   | 0.0013              | 0.0237     |
| 4762 Ube2L                                                  | P49430  | 0.2665              | 0.4571     | 0.36                | 0.4571  | 0.6553              | -0.72  | 0.0332              | 0.0785     |
| 4763 Ube2M                                                  | P68371  | 0.0060              | 0.0466     | 0.29                | 0.0188  | 0.2451              | 0.6582 | 0.21                | 0.0038     |
| 4764 Ube2N                                                  | Q9BUP5  | 0.1725              | 0.0651     | 0.38                | 0.1741  | 0.6612              | 0.24   | 0.0006              | 0.0195     |
| 4765 Ube2O                                                  | Q32M27  | 0.0197              | 0.3430     | 0.06                | 0.2441  | 0.6575              | 0.18   | 0.0071              | 0.0398     |
| 4766 Ube2P                                                  | A6NNZ2  | 0.0271              | 0.0998     | -0.05               | 0.0980  | 0.6338              | -0.16  | 0.6332              | 0.6865     |
| 4767 Ube2Q                                                  | P23258  | 0.0496              | 0.1433     | -13.41              | 0.0397  | 0.5634              | -11.85 | 0.0133              | 0.0539     |
| 4768 Ube2R                                                  | Q9NRH3  | 0.0006              | 0.0187     | -4.05               | 0.2372  | 0.6624              | -2.53  | 0.1947              | 0.3435     |
| 4769 Ube2S                                                  | Q99426  | 0.0300              | 0.1063     | 0.10                | 0.4916  | 0.8144              | 0.13   | 0.0018              | 0.0237     |
| 4770 Ube2T                                                  | Q75347  | 0.0420              | 0.1300     | 0.15                | 0.2153  | 0.6607              | 0.30   | 0.0111              | 0.0489     |
| 4771 Ube2U                                                  | Q15814  | 0.0785              | 0.1719     | -0.16               | 0.0463  | 0.5630              | -0.19  | 0.7289              | 0.7724     |

Supplementary Table S2. Overview on all relatively quantified 5180 proteins statistical analysis

|              |                                                        | MCF-7               |            |                     |         | MDA-MB-231          |        |                     |            |                     |         |                     |        |
|--------------|--------------------------------------------------------|---------------------|------------|---------------------|---------|---------------------|--------|---------------------|------------|---------------------|---------|---------------------|--------|
|              |                                                        | Dai IC20 vs control |            | Gen IC20 vs control |         | SSE IC20 vs control |        | Dai IC20 vs control |            | Gen IC20 vs control |         | SSE IC20 vs control |        |
| Protein name | UniProt                                                | p value             | BH q value | log2FC              | p value | BH q value          | log2FC | p value             | BH q value | log2FC              | p value | BH q value          | log2FC |
| 4772         | Tubulin-specific chaperone D                           | Q9BTW9              | 0.0933     | 0.2149              | 0.11    | 0.1970              | 0.6705 | 0.30                | 0.0023     | 0.0267              | 0.43    | 0.0024              | 0.0545 |
| 4773         | Tubulin-specific chaperone E                           | Q15813              | 0.4108     | 0.4995              | -3.31   | 0.5752              | 0.6994 | -1.75               | 0.5661     | 0.6368              | -1.49   | 0.9774              | 0.0821 |
| 4774         | Tubulin-tyrosine ligase-like protein 12                | Q14166              | 0.0098     | 0.0577              | 0.12    | 0.0769              | 0.6128 | 0.09                | 0.0018     | 0.0243              | 0.26    | 0.0504              | 0.0823 |
| 4775         | Tubulin-tyr carboxypeptidase 1                         | Q7L8A9              | 0.0261     | 0.0978              | 0.26    | 0.4813              | 0.8063 | -0.24               | 0.0021     | 0.0257              | 0.64    | 0.0952              | 0.2326 |
| 4776         | Tubulin-tyrosine ligase-like protein 12                | Q9Y2W6              | 0.0322     | 0.1115              | -0.19   | 0.0906              | 0.2230 | -0.55               | 0.0014     | 0.0235              | -0.48   | 0.1501              | 0.0651 |
| 4777         | Tadpole domain-containing protein 6                    | Q60522              | 0.0074     | 0.0504              | 0.16    | 0.3216              | 0.6839 | 0.10                | 0.0004     | 0.0187              | 0.29    | 0.0512              | 0.0936 |
| 4778         | Tubulin-interacting protein 11                         | Q9UBB9              | 0.4108     | 0.4994              | -3.31   | 0.5752              | 0.6993 | -1.75               | 0.5661     | 0.6366              | -1.49   | 0.9772              | 0.1622 |
| 4779         | Tumor necrosis factor alpha-induced protein 8          | Q95379              | 0.4108     | 0.4993              | -3.31   | 0.5752              | 0.6991 | -1.75               | 0.5661     | 0.6365              | -1.49   | 0.9770              | 0.1839 |
| 4780         | Tumor necrosis factor receptor superfamily member EDAR | Q9UNE0              | 0.3295     | 0.5361              | 1.61    | 0.2704              | 0.6635 | -1.84               | 0.0083     | 0.0429              | 1.60    | 0.8576              | 0.0651 |
| 4781         | Tumor protein D52                                      | P55327              | 0.1548     | 0.3069              | -0.07   | 0.7304              | 0.8036 | 0.04                | 0.1305     | 0.2514              | 0.08    | 0.5435              | 0.7165 |
| 4782         | Tumor protein D53                                      | Q16890              | 0.1848     | 0.3496              | -0.08   | 0.3646              | 0.7132 | -0.16               | 0.5440     | 0.7668              | 0.04    | 0.3736              | 0.291  |
| 4783         | Tumor protein D54                                      | Q43399              | 0.1129     | 0.2447              | 0.12    | 0.8447              | 0.8883 | 0.01                | 0.0403     | 0.1071              | 0.23    | 0.0652              | 0.6819 |
| 4784         | Tumor protein p53-inducible protein 11                 | Q14683              | 0.0179     | 0.0784              | 0.18    | 0.0443              | 0.5694 | 0.46                | 0.0204     | 0.0688              | 0.31    | 0.0733              | 0.1984 |
| 4785         | Tumor suppressor candidate gene 1 protein              | Q2TAM9              | 0.0522     | 0.1478              | -0.18   | 0.4127              | 0.7525 | 0.10                | 0.0710     | 0.1588              | -0.03   | 0.4324              | 0.261  |
| 4786         | Tumor susceptibility gene 101 protein                  | Q99816              | 0.0043     | 0.0412              | 0.33    | 0.3145              | 0.6802 | 0.08                | 0.8630     | 0.8907              | -0.01   | 0.0764              | 0.1614 |
| 4787         | Tumor-associated calcium signal transducer 2           | P09758              | 0.0104     | 0.0589              | 0.28    | 0.1658              | 0.6612 | 0.26                | 0.0014     | 0.0229              | 0.45    | 0.0987              | 0.0851 |
| 4788         | Twinfilin-1                                            | T12792              | 0.0539     | 0.1515              | 0.13    | 0.3914              | 0.7354 | 0.09                | 0.3058     | 0.4889              | 0.08    | 0.0328              | 0.7208 |
| 4789         | Twinfilin-2                                            | Q6IIB80             | 0.0003     | 0.0139              | 1.24    | 0.6685              | 0.7705 | -0.01               | 0.0147     | 0.0570              | -0.20   | 0.9630              | 0.0305 |
| 4790         | Twisted gastrulation protein homolog 1                 | Q9GZX9              | 0.4108     | 0.4992              | -3.31   | 0.5752              | 0.6989 | -1.75               | 0.5661     | 0.6364              | -1.49   | 0.9768              | 0.1654 |
| 4791         | Twist-related protein 1                                | Q15672              | 0.0034     | 0.0376              | 1.07    | 0.0504              | 0.5738 | 0.30                | 0.2692     | 0.4417              | 0.13    | 0.0874              | 0.1599 |
| 4792         | Type II insulin 1 4-5-phosphatase 5-phosphatase        | P12019              | 0.1366     | 0.2811              | -0.06   | 0.0176              | 0.4651 | -0.12               | 0.9554     | 0.9645              | 0.00    | 0.1528              | 0.1690 |
| 4793         | Type II insulin 3 4-phosphatase 4-phosphatase          | U15327              | 0.0192     | 0.0814              | -0.50   | 0.8187              | 0.8705 | 0.02                | 0.0309     | 0.0898              | -0.39   | 0.0219              | 0.1877 |
| 4794         | Type-1 anaplastic T-cell receptor-associated protein   | Q6RW13              | 0.4108     | 0.4990              | -3.31   | 0.5752              | 0.6988 | -1.75               | 0.5661     | 0.6362              | -1.49   | 0.9766              | 0.1256 |
| 4795         | Tyrosine aminotransferase                              | P17735              | 0.4108     | 0.4989              | -3.31   | 0.5752              | 0.6986 | -1.75               | 0.5661     | 0.6361              | -1.49   | 0.9749              | 0.0389 |
| 4796         | Tyrosine-protein kinase BTK                            | Q60187              | 0.4108     | 0.4988              | -3.31   | 0.5752              | 0.6984 | -1.75               | 0.5661     | 0.6360              | -1.49   | 0.9763              | 0.1295 |
| 4797         | Tyrosine-protein kinase CSK                            | P14240              | 0.5610     | 0.6297              | 0.03    | 0.5331              | 0.8499 | 0.04                | 0.0431     | 0.1128              | 0.06    | 0.0956              | 0.1737 |
| 4798         | Tyrosine-protein kinase Fer                            | P16591              | 0.0003     | 0.0138              | 0.80    | 0.0431              | 0.5695 | 1.78                | 0.0708     | 0.1584              | -5.29   | 0.0067              | 0.1355 |
| 4799         | Tyrosine-protein kinase Fgr                            | P09769              | 0.0376     | 0.1216              | -0.21   | 0.0973              | 0.6340 | 0.16                | 0.2639     | 0.4341              | -0.07   | 0.9776              | 0.2019 |
| 4800         | Tyrosine-protein kinase HCK                            | P08631              | 0.1105     | 0.2413              | 0.07    | 0.0487              | 0.5746 | 0.12                | 0.8310     | 0.8637              | -0.01   | 0.9877              | 0.3841 |
| 4801         | Tyrosine-protein kinase JAK1                           | P23458              | 0.4108     | 0.4987              | -3.31   | 0.5752              | 0.6983 | -1.75               | 0.5661     | 0.6358              | -1.49   | 0.9761              | 0.4659 |
| 4802         | Tyrosine-protein kinase Lyn                            | P07948              | 0.4108     | 0.4986              | -3.31   | 0.5752              | 0.6981 | -1.75               | 0.5661     | 0.6357              | -1.49   | 0.9739              | 0.4840 |
| 4803         | Tyrosine-protein kinase receptor Tie-1                 | P35590              | 0.4108     | 0.4985              | -3.31   | 0.5752              | 0.6979 | -1.75               | 0.5661     | 0.6355              | -1.49   | 0.9757              | 0.4408 |
| 4804         | Tyrosine-protein kinase receptor UFO                   | P30530              | 0.4108     | 0.4983              | -3.31   | 0.5752              | 0.6978 | -1.75               | 0.5661     | 0.6354              | -1.49   | 0.9755              | 0.3752 |
| 4805         | Tyrosine-protein kinase transmembrane receptor ROR2    | Q01974              | 0.4108     | 0.4982              | -3.31   | 0.5752              | 0.6976 | -1.75               | 0.5661     | 0.6353              | -1.49   | 0.9753              | 0.8243 |
| 4806         | Tyrosine-protein kinase Yes                            | P07947              | 0.6517     | 0.7128              | -0.09   | 0.4483              | 0.7829 | 0.20                | 0.5060     | 0.7279              | -0.13   | 0.3094              | 0.4459 |
| 4807         | Tyrosine-protein kinase ZAP-70                         | P43403              | 0.2648     | 0.4563              | 0.49    | 0.9804              | 0.9867 | -0.01               | 0.3402     | 0.5327              | 0.40    | 0.9539              | 0.049  |
| 4808         | Tyrosine-protein phosphatase non-receptor type 1       | P18031              | 0.0072     | 0.0446              | 0.24    | 0.1651              | 0.6609 | 0.29                | 0.0005     | 0.0195              | 0.49    | 0.1526              | 0.7215 |
| 4809         | Tyrosine-protein phosphatase non-receptor type 11      | Q60124              | 0.0642     | 0.2004              | 0.10    | 0.0127              | 0.6318 | 0.16                | 0.0108     | 0.0485              | 0.28    | 0.0603              | 0.5576 |
| 4810         | Tyrosine-protein phosphatase non-receptor type 12      | Q05209              | 0.7910     | 0.8308              | 0.13    | 0.4379              | 0.7742 | -0.39               | 0.6527     | 0.7044              | -0.23   | 0.2976              | 0.4410 |
| 4811         | Tyrosine-protein phosphatase non-receptor type 13      | T12923              | 0.2074     | 0.3798              | 0.09    | 0.0290              | 0.9873 | 0.00                | 0.0599     | 0.1415              | -0.17   | 0.0669              | 0.1655 |
| 4812         | Tyrosine-protein phosphatase non-receptor type 2       | P17706              | 0.4108     | 0.4981              | -3.31   | 0.5752              | 0.6975 | -1.75               | 0.5661     | 0.6351              | -1.49   | 0.9769              | 0.0489 |
| 4813         | Tyrosine-protein phosphatase non-receptor type 20      | Q4JDL3              | 0.4451     | 0.5227              | -0.04   | 0.8963              | 0.9267 | -0.01               | 0.0859     | 0.1826              | -0.09   | 0.0828              | 0.1582 |
| 4814         | Tyrosine-protein phosphatase non-receptor type 23      | Q9H387              | 0.1093     | 0.2392              | 0.06    | 0.9635              | 0.9754 | 0.00                | 0.4072     | 0.6126              | 0.03    | 0.0836              | 0.1448 |
| 4815         | Tyrosine-protein phosphatase non-receptor type 26      | P29350              | 0.0662     | 0.1704              | -0.10   | 0.2655              | 0.6631 | 0.14                | 0.3917     | 0.5935              | 0.04    | 0.0462              | 0.1798 |
| 4816         | Tyrosine-tRNA ligase cytoplasmic                       | P54577              | 0.0190     | 0.0809              | 0.18    | 0.2815              | 0.6649 | 0.20                | 0.0073     | 0.0404              | 0.23    | 0.0017              | 0.2579 |
| 4817         | Tyrosine-tRNA ligase mitochondrial                     | Q9Y2Z4              | 0.0011     | 0.0223              | 0.25    | 0.2984              | 0.6692 | -1.51               | 0.0580     | 0.1383              | -5.92   | 0.0687              | 0.0589 |
| 4818         | Tyrosyl-DNA phosphodiesterase 1                        | Q9NUW8              | 0.1730     | 0.3343              | 0.50    | 0.3599              | 0.7083 | 0.36                | 0.1536     | 0.2850              | 0.53    | 0.3812              | 0.1265 |
| 4819         | Tyrosyl-DNA phosphodiesterase 2                        | O95551              | 0.4108     | 0.4980              | -3.31   | 0.5752              | 0.6973 | -1.75               | 0.5661     | 0.6350              | -1.49   | 0.9749              | 0.1829 |
| 4820         | U1 small nuclear ribonucleoprotein 70 kDa              | P08621              | 0.0393     | 0.1247              | 0.15    | 0.5795              | 0.6874 | 0.09                | 0.0040     | 0.0318              | 0.34    | 0.3739              | 0.1511 |
| 4821         | U1 small nuclear ribonucleoprotein A                   | P09012              | 0.0651     | 0.1689              | -0.11   | 0.8254              | 0.8745 | -0.03               | 0.2551     | 0.4230              | 0.07    | 0.0502              | 0.1035 |
| 4822         | U1 small nuclear ribonucleoprotein C                   | P09234              | 0.2099     | 0.3826              | -0.13   | 0.0002              | 0.2072 | -0.46               | 0.4455     | 0.1174              | -0.15   | 0.0129              | 0.5072 |
| 4823         | U1/U12 small nuclear ribonucleoprotein 35 kDa protein  | Q16560              | 0.4108     | 0.4979              | -3.31   | 0.5752              | 0.6971 | -1.75               | 0.5661     | 0.6349              | -1.49   | 0.9739              | 0.1218 |
| 4824         | U2 small nuclear ribonucleoprotein A'                  | P09661              | 0.0147     | 0.0704              | 0.30    | 0.0475              | 0.5696 | 0.21                | 0.0052     | 0.0353              | 0.16    | 0.0563              | 0.1802 |
| 4825         | U2 small nuclear ribonucleoprotein B'                  | P08759              | 0.0190     | 0.0809              | 0.23    | 0.2134              | 0.6657 | 0.42                | 0.0128     | 0.0531              | 0.34    | 0.0617              | 0.0427 |
| 4826         | U3 small nuclear ribonucleoprotein protein IMP3        | Q9NU31              | 0.2059     | 0.3785              | 0.18    | 0.8628              | 0.9099 | 0.04                | 0.9851     | 0.1493              | 0.26    | 0.0134              | 0.1519 |
| 4827         | U3 small nuclear ribonucleoprotein protein IMP4        | P09621              | 0.2037     | 0.3754              | -0.52   | 0.5435              | 0.8578 | -0.29               | 0.1100     | 0.7560              | -0.13   | 0.0526              | 0.0861 |
| 4828         | U3 small nuclear RNA-associated protein 14 homolog A   | Q9BV16              | 0.0878     | 0.2062              | -0.24   | 0.1561              | 0.6628 | -0.51               | 0.4730     | 0.6904              | 0.08    | 0.1734              | 0.5681 |
| 4829         | U3 small nuclear RNA-associated protein 18 homolog     | Q9Y5J1              | 0.2200     | 0.3962              | -0.13   | 0.4093              | 0.7505 | -0.07               | 0.0642     | 0.1477              | -0.22   | 0.1263              | 0.1596 |
| 4830         | U3 small nuclear RNA-associated protein 6 homolog      | Q9NYH9              | 0.4108     | 0.4978              | -3.31   | 0.5752              | 0.6970 | -1.75               | 0.5661     | 0.6347              | -1.49   | 0.9738              | 0.6856 |
| 4831         | U4/U6 small nuclear ribonucleoprotein Prp3             | Q43395              | 0.6923     | 0.7473              | 0.02    | 0.5443              | 0.6623 | 0.10                | 0.1078     | 0.2168              | 0.09    | 0.0375              | 0.1637 |
| 4832         | U4/U6 small nuclear ribonucleoprotein Prp31            | Q8WVY3              | 0.7798     | 0.8208              | -0.02   | 0.5528              | 0.8683 | 0.05                | 0.4693     | 0.6867              | 0.07    | 0.6101              | 0.5131 |
| 4833         | U4/U6 small nuclear ribonucleoprotein Prp3             | Q43172              | 0.0640     | 0.1674              | 0.16    | 0.1429              | 0.6545 | -0.12               | 0.0769     | 0.1674              | 0.18    | 0.6913              | 0.2917 |
| 4834         | U4/U6/U5 tri-snRNP-associated protein 1                | Q43290              | 0.1518     | 0.3025              | -0.05   | 0.3257              | 0.6853 | -0.03               | 0.5026     | 0.7248              | -0.02   | 0.0514              | 0.1365 |
| 4835         | U4/U6/U5 tri-snRNP-associated protein 2                | Q53G59              | 0.0609     | 0.1634              | 0.14    | 0.2116              | 0.6589 | 0.17                | 0.0248     | 0.0781              | 0.07    | 0.0032              | 0.1967 |
| 4836         | U5 small nuclear ribonucleoprotein 200 kDa helicase    | Q75643              | 0.4108     | 0.4976              | -3.31   | 0.5752              | 0.6968 | -1.75               | 0.5661     | 0.6346              | -1.49   | 0.9748              | 0.0427 |
| 4837         | U6 snRNP-associated Sm-like protein LSm2               | Q9Y333              | 0.0431     | 0.1316              | -0.36   | 0.5587              | 0.8722 | -0.10               | 0.8616     | 0.9653              | -0.27   | 0.0317              | 0.0941 |
| 4838         | U6 snRNP-associated Sm-like protein LSm4               | Q9Y420              | 0.2001     | 0.3708              | 0.13    | 0.8017              | 0.8570 | 0.04                | 0.6863     | 0.7533              | 0.03    | 0.0282              | 0.2004 |
| 4839         | U6 snRNP-associated Sm-like protein LSm8               | Q9Y577              | 0.5156     | 0.5880              | -0.16   | 0.0417              | 0.7453 | -0.48               | 0.4485     | 0.6619              | -0.18   | 0.4006              | 0.1334 |
| 4840         | Ubiquitin-1                                            | Q9UMX0              | 0.2809     | 0.4744              | -0.02   | 0.2120              | 0.6619 | -0.13               | 0.0093     | 0.0451              | -0.12   | 0.0167              | 0.7538 |
| 4841         | Ubiquitin-2                                            | Q9UID9              | 0.0379     | 0.1222              | 0.15    | 0.1960              | 0.6688 | 0.18                | 0.0037     | 0.0317              | 0.33    | 0.0002              | 0.4910 |
| 4842         | Ubiquitin-4                                            | Q9NRR5              | 0.1628     | 0.3196              | -0.05   |                     |        |                     |            |                     |         |                     |        |



Supplementary Table S2. Overview on all relatively quantified 5180 proteins statistical analysis

| Protein name                                                             | UniProt    | MCF-7               |                     |                     |                     | MDA-MB-231          |                     |                     |                     |            |        |        |       |        |        |       |        |        |       |        |        |       |        |        |       |        |        |       |
|--------------------------------------------------------------------------|------------|---------------------|---------------------|---------------------|---------------------|---------------------|---------------------|---------------------|---------------------|------------|--------|--------|-------|--------|--------|-------|--------|--------|-------|--------|--------|-------|--------|--------|-------|--------|--------|-------|
|                                                                          |            | Dai SC20 vs control | Gen SC20 vs control | SSE SC20 vs control | Dai IC20 vs control | Gen IC20 vs control | SSE IC20 vs control | Dai IC20 vs control | Gen IC20 vs control |            |        |        |       |        |        |       |        |        |       |        |        |       |        |        |       |        |        |       |
| p value                                                                  | BH q value | log2FC              | p value             | BH q value          | log2FC              | p value             | BH q value          | log2FC              | p value             | BH q value | log2FC |        |       |        |        |       |        |        |       |        |        |       |        |        |       |        |        |       |
| 4853 Ubiquitin carboxyl-terminal hydrolase 30                            | Q70CQ3     | 0.4108              | 0.4973              | -3.31               | 0.5752              | 0.6963              | -1.75               | 0.5661              | 0.6342              | -1.19      | 0.5388 | 0.6001 | 0.89  | 0.2938 | 0.3993 | -1.88 | 0.9510 | 0.9737 | 0.09  | 0.0204 | 0.1319 | -7.72 | 0.4360 | 0.8365 | 0.10  | 0.0015 | 0.0468 | 1.42  |
| 4854 Ubiquitin carboxyl-terminal hydrolase 32                            | Q8NFA0     | 0.0257              | 0.0969              | 0.14                | 0.0399              | 0.5632              | 0.14                | 0.0199              | 0.0681              | 0.20       | 0.0968 | 0.1894 | 0.16  | 0.0929 | 0.2404 | 0.08  | 0.1437 | 0.2991 | 0.12  | 0.3736 | 0.5190 | -2.55 | 0.8708 | 1.0681 | -0.33 | 0.0651 | 0.1497 | 2.06  |
| 4855 Ubiquitin carboxyl-terminal hydrolase 34                            | Q70CQ2     | 0.0034              | 0.0376              | 0.11                | 0.2782              | 0.6653              | 0.19                | 0.0003              | 0.0197              | 0.34       | 0.0004 | 0.0130 | 0.21  | 0.5513 | 0.6346 | 0.01  | 0.0146 | 0.0804 | 0.15  | 0.1350 | 0.3130 | 0.08  | 0.4052 | 0.7903 | 0.04  | 0.0623 | 0.2232 | 0.12  |
| 4856 Ubiquitin carboxyl-terminal hydrolase 47                            | Q96K76     | 0.0049              | 0.0429              | 0.17                | 0.1427              | 0.6553              | 0.20                | 0.0166              | 0.0611              | 0.14       | 0.0557 | 0.1247 | 0.09  | 0.0019 | 0.0345 | 0.22  | 0.0258 | 0.1023 | 0.17  | 0.1303 | 0.3053 | 0.28  | 0.0323 | 0.1621 | 0.39  | 0.4334 | 0.5946 | 0.13  |
| 4857 Ubiquitin carboxyl-terminal hydrolase 48                            | Q96K75     | 0.4108              | 0.4972              | -3.31               | 0.5752              | 0.6962              | -1.75               | 0.5661              | 0.6340              | -1.19      | 0.5388 | 0.6000 | 0.89  | 0.2938 | 0.3992 | -1.88 | 0.9510 | 0.9736 | 0.09  | 0.0544 | 0.1851 | 0.37  | 0.5478 | 0.9734 | -0.07 | 0.0883 | 0.1374 | -0.21 |
| 4858 Ubiquitin carboxyl-terminal hydrolase 49                            | Q70CQ1     | 0.5123              | 0.5849              | -0.04               | 0.3871              | 0.7294              | 0.10                | 0.9645              | 0.9714              | 0.00       | 0.6779 | 1.1444 | 0.19  | 0.1518 | 0.3298 | 0.12  | 0.9290 | 1.1663 | -0.01 | 0.3736 | 0.4327 | -2.55 | 0.8708 | 0.9083 | -0.33 | 0.0651 | 0.1126 | -2.06 |
| 4859 Ubiquitin carboxyl-terminal hydrolase 5                             | P45974     | 0.0223              | 0.0889              | 0.05                | 0.0970              | 0.6344              | 0.19                | 0.0045              | 0.0332              | 0.20       | 0.0004 | 0.0118 | 0.24  | 0.0026 | 0.0396 | 0.12  | 0.0030 | 0.0557 | 0.17  | 0.0346 | 0.1545 | 0.41  | 0.266  | 0.3713 | 0.15  | 0.3139 | 0.3851 | 0.08  |
| 4860 Ubiquitin carboxyl-terminal hydrolase 7                             | Q93009     | 0.0235              | 0.0921              | 0.18                | 0.3404              | 0.6992              | 0.07                | 0.0167              | 0.0612              | 0.23       | 0.0302 | 0.0807 | 0.15  | 0.0583 | 0.1813 | -0.12 | 0.0284 | 0.1079 | 0.18  | 0.9918 | 0.9937 | 0.00  | 0.0923 | 0.3018 | 0.28  | 0.0479 | 0.1912 | 0.40  |
| 4861 Ubiquitin carboxyl-terminal hydrolase 8                             | P40818     | 0.0451              | 0.1354              | -0.09               | 0.5011              | 0.8230              | 0.11                | 0.1157              | 0.2294              | 0.10       | 0.1010 | 0.0421 | 0.14  | 0.6970 | 0.7590 | 0.01  | 0.5516 | 0.7856 | 0.02  | 0.0255 | 0.1396 | 0.26  | 0.0626 | 0.2395 | 0.15  | 0.0860 | 0.1383 | 0.22  |
| 4862 Ubiquitin carboxyl-terminal hydrolase isozyme L3                    | P15374     | 0.1150              | 0.2483              | 0.25                | 0.0201              | 0.4733              | 0.41                | 0.0008              | 0.0223              | 0.46       | 0.0037 | 0.0247 | 0.38  | 0.0029 | 0.0412 | 0.33  | 0.0343 | 0.1196 | 0.56  | 0.1826 | 0.3839 | -0.08 | 0.2037 | 0.5034 | -0.07 | 0.2914 | 0.3633 | -0.05 |
| 4863 Ubiquitin carboxyl-terminal hydrolase isozyme L5                    | Q9Y5K5     | 0.0195              | 0.0819              | 0.12                | 0.6999              | 0.7787              | 0.04                | 0.0154              | 0.0583              | 0.14       | 0.0671 | 0.1432 | 0.08  | 0.0553 | 0.1754 | -0.09 | 0.0879 | 0.2159 | 0.07  | 0.0108 | 0.1021 | -0.28 | 0.0167 | 0.1098 | -0.17 | 0.0316 | 0.1510 | -0.17 |
| 4864 Ubiquitin conjugation factor E4 A                                   | Q14139     | 0.7841              | 0.8247              | -0.01               | 0.0569              | 0.5848              | 0.35                | 0.0014              | 0.0230              | 0.24       | 0.0258 | 0.0722 | 0.23  | 0.0004 | 0.0162 | 0.22  | 0.1352 | 0.2873 | 0.07  | 0.3736 | 0.5221 | -2.55 | 0.8708 | 1.0737 | -0.33 | 0.0651 | 0.1512 | -2.06 |
| 4865 Ubiquitin conjugation factor E4 B                                   | O95155     | 0.4108              | 0.4971              | -3.31               | 0.5752              | 0.6960              | -1.75               | 0.5661              | 0.6339              | -1.19      | 0.5388 | 0.5998 | 0.89  | 0.2938 | 0.3991 | -1.88 | 0.9510 | 0.9734 | 0.09  | 0.0717 | 0.2120 | 0.29  | 0.747  | 1.1836 | 0.02  | 0.4018 | 0.4735 | 0.08  |
| 4866 Ubiquitin domain-containing protein UBFD1                           | U14562     | 0.2088              | 0.3816              | -0.05               | 0.6250              | 0.7225              | 0.14                | 0.1131              | 0.2252              | 0.13       | 0.0162 | 0.0528 | 0.14  | 0.2401 | 0.4533 | -0.05 | 0.6274 | 0.8632 | -0.04 | 0.3736 | 0.4495 | -2.55 | 0.8708 | 0.9399 | -0.33 | 0.0651 | 0.1193 | -2.06 |
| 4867 Ubiquitin recognition factor in ER-associated degradation protein 1 | Q92890     | 0.0598              | 0.1818              | -0.35               | 0.3050              | 0.6772              | -0.08               | 0.0547              | 0.1330              | -0.36      | 0.4716 | 0.6711 | -0.05 | 0.0521 | 0.1691 | -0.19 | 0.0138 | 0.0780 | -0.34 | 0.1010 | 0.2572 | -1.24 | 0.0416 | 0.1877 | -0.66 | 0.0246 | 0.1329 | -2.04 |
| 4868 Ubiquitin thioesterase                                              | Q96FW1     | 0.1315              | 0.2735              | 0.09                | 0.2633              | 0.6634              | 0.25                | 0.0407              | 0.1078              | 0.16       | 0.0095 | 0.0391 | 0.25  | 0.1178 | 0.2816 | 0.09  | 0.0218 | 0.0951 | 0.25  | 0.8637 | 0.8868 | 0.02  | 0.0485 | 0.2059 | -0.25 | 0.0397 | 0.1724 | -0.28 |
| 4869 Ubiquitin thioesterase outlin                                       | Q96BN8     | 0.0201              | 0.0835              | -0.14               | 0.0070              | 0.4168              | -0.19               | 0.0004              | 0.0241              | -0.43      | 0.0036 | 0.0242 | -0.25 | 0.0008 | 0.0218 | -0.44 | 0.0370 | 0.1248 | 0.12  | 0.1030 | 0.2606 | 0.18  | 0.0253 | 0.1421 | -0.22 | 0.0454 | 0.5268 | -0.04 |
| 4870 Ubiquitin-40S ribosomal protein S27a                                | P62979     | 0.0006              | 0.0186              | 0.55                | 0.0601              | 0.5953              | 0.62                | 0.0002              | 0.0220              | 0.74       | 0.0001 | 0.0136 | 0.87  | 0.0028 | 0.0407 | -1.48 | 0.0027 | 0.0559 | 0.74  | 0.0118 | 0.1045 | 0.60  | 0.5866 | 1.0190 | 0.06  | 0.0532 | 0.2034 | 0.21  |
| 4871 Ubiquitin-associated and SH3 domain-containing protein B            | Q8T142     | 0.4108              | 0.4970              | -3.31               | 0.5752              | 0.6958              | -1.75               | 0.5661              | 0.6338              | -1.19      | 0.5388 | 0.5997 | 0.89  | 0.2938 | 0.3990 | -1.88 | 0.9510 | 0.9732 | 0.09  | 0.0223 | 0.1356 | 0.22  | 0.2856 | 0.6240 | -0.07 | 0.0518 | 0.6258 | 0.05  |
| 4872 Ubiquitin-associated domain-containing protein 2                    | Q8NBM4     | 0.1768              | 0.3391              | -0.14               | 0.4649              | 0.7964              | 0.06                | 0.0530              | 0.1304              | -0.18      | 0.0813 | 0.1662 | 0.18  | 0.0039 | 0.0460 | 0.65  | 0.6884 | 0.9284 | -0.06 | 0.3736 | 0.4456 | -2.55 | 0.8708 | 0.9325 | -0.33 | 0.0651 | 0.1177 | -2.06 |
| 4873 Ubiquitin-associated domain-2-like                                  | Q14157     | 0.0031              | 0.0362              | 0.39                | 0.1667              | 0.6597              | 0.31                | 0.0013              | 0.0231              | 0.36       | 0.0015 | 0.0178 | 0.32  | 0.0941 | 0.2429 | 0.09  | 0.0091 | 0.0689 | 0.28  | 0.0310 | 0.1488 | 0.37  | 0.6441 | 1.0822 | 0.04  | 0.6683 | 0.7226 | 0.03  |
| 4874 Ubiquitin-conjugating enzyme E2 C                                   | U00762     | 0.5296              | 0.6008              | -0.08               | 0.1174              | 0.6322              | -1.10               | 0.5033              | 0.7256              | -0.18      | 0.2747 | 0.4320 | -0.26 | 0.1279 | 0.2955 | -0.41 | 0.0967 | 0.2295 | -0.18 | 0.3375 | 0.6081 | -0.28 | 0.7387 | 1.1810 | -0.11 | 0.3572 | 0.4285 | -0.02 |
| 4875 Ubiquitin-conjugating enzyme E2 D3                                  | P61077     | 0.0104              | 0.0588              | -0.24               | 0.2426              | 0.6597              | -0.16               | 0.3214              | 0.5090              | 0.10       | 0.0006 | 0.0123 | -0.48 | 0.0015 | 0.0306 | -0.31 | 0.5141 | 0.7414 | -0.08 | 0.0004 | 0.0377 | -1.33 | 0.0374 | 0.1766 | -0.24 | 0.0007 | 0.0321 | -1.08 |
| 4876 Ubiquitin-conjugating enzyme E2 E1                                  | P51965     | 0.0004              | 0.0157              | 0.46                | 0.0998              | 0.6359              | 0.36                | 0.0002              | 0.0195              | 0.63       | 0.0000 | 0.0000 | 0.59  | 0.0083 | 0.0659 | 0.22  | 0.0001 | 0.0273 | 0.89  | 0.0066 | 0.0848 | -1.32 | 0.0002 | 0.0173 | -1.07 | 0.0513 | 0.1989 | -0.92 |
| 4877 Ubiquitin-conjugating enzyme E2 G2                                  | P60604     | 0.4769              | 0.5524              | -0.08               | 0.9403              | 0.9601              | -0.01               | 0.1002              | 0.2042              | 0.18       | 0.5715 | 0.6214 | 0.05  | 0.0505 | 0.1660 | 0.30  | 0.1143 | 0.2569 | 0.18  | 0.3736 | 0.5298 | -2.55 | 0.8708 | 1.0877 | -0.33 | 0.0651 | 0.1550 | -2.06 |
| 4878 Ubiquitin-conjugating enzyme E2 J1                                  | Q9Y385     | 0.2059              | 0.3783              | 0.80                | 0.7402              | 0.8411              | -0.19               | 0.2605              | 0.4296              | 0.63       | 0.2731 | 0.4301 | 0.60  | 0.3644 | 0.4612 | 0.49  | 0.3224 | 0.5252 | 0.53  | 0.3736 | 0.4778 | -2.55 | 0.8708 | 0.9927 | -0.33 | 0.0651 | 0.1311 | -2.06 |
| 4879 Ubiquitin-conjugating enzyme E2 K1                                  | P61086     | 0.0435              | 0.1323              | 0.20                | 0.0145              | 0.4771              | 0.30                | 0.1857              | 0.3309              | 0.11       | 0.0025 | 0.0209 | 0.51  | 0.0586 | 0.1819 | 0.20  | 0.4518 | 0.6739 | -0.05 | 0.0183 | 0.1256 | -0.35 | 0.0050 | 0.0567 | -0.23 | 0.0046 | 0.0666 | -0.27 |
| 4880 Ubiquitin-conjugating enzyme E2 L3                                  | P68036     | 0.0292              | 0.1044              | 0.15                | 0.2414              | 0.6602              | 0.19                | 0.1864              | 0.3317              | 0.09       | 0.0177 | 0.0561 | 0.17  | 0.1185 | 0.2824 | -0.08 | 0.1519 | 0.3095 | 0.07  | 0.0661 | 0.2021 | 0.48  | 0.0614 | 0.2368 | 0.23  | 0.0855 | 0.1378 | -0.20 |
| 4881 Ubiquitin-conjugating enzyme E2 N1                                  | P61088     | 0.0219              | 0.0879              | 0.11                | 0.2577              | 0.6625              | 0.11                | 0.0728              | 0.1614              | 0.14       | 0.0004 | 0.0111 | 0.22  | 0.7598 | 0.8122 | -0.01 | 0.0413 | 0.0796 | 0.21  | 0.3494 | 0.6243 | -0.12 | 0.1110 | 0.3398 | -0.19 | 0.2607 | 0.3328 | -0.08 |
| 4882 Ubiquitin-conjugating enzyme E2 S                                   | U16763     | 0.4108              | 0.4968              | -3.31               | 0.5752              | 0.6957              | -1.75               | 0.5661              | 0.6336              | -1.19      | 0.5388 | 0.5996 | 0.89  | 0.2938 | 0.3989 | -1.88 | 0.9510 | 0.9730 | 0.09  | 0.8425 | 0.8675 | 0.02  | 0.0464 | 0.2005 | 0.43  | 0.4827 | 0.5510 | -0.09 |
| 4883 Ubiquitin-conjugating enzyme E2 T                                   | Q9NPD8     | 0.0281              | 0.1018              | -0.41               | 0.2046              | 0.6595              | -0.19               | 0.0911              | 0.1900              | -0.21      | 0.7801 | 0.8109 | 0.03  | 0.0759 | 0.2118 | -0.24 | 0.0164 | 0.0850 | -0.45 | 0.0169 | 0.1209 | 0.19  | 0.3323 | 0.6894 | 0.04  | 0.9576 | 0.9666 | -0.01 |
| 4884 Ubiquitin-conjugating enzyme E2 variant 1                           | U13404     | 0.0185              | 0.0799              | 0.23                | 0.2662              | 0.6629              | 0.18                | 0.1037              | 0.2100              | 0.11       | 0.0229 | 0.0664 | 0.20  | 0.1045 | 0.2604 | 0.10  | 0.0298 | 0.1107 | 0.20  | 0.0809 | 0.2266 | 0.25  | 0.0459 | 0.1993 | 0.26  | 0.0542 | 0.2051 | -0.20 |
| 4885 Ubiquitin-conjugating enzyme E2 variant 2                           | U15819     | 0.3113              | 0.5124              | 0.07                | 0.3267              | 0.6863              | 0.20                | 0.0417              | 0.1101              | 0.19       | 0.0165 | 0.0535 | 0.26  | 0.9358 | 0.9640 | 0.00  | 0.0576 | 0.1165 | 0.19  | 0.1020 | 0.1039 | -0.24 | 0.3553 | 0.7209 | -0.06 | 0.0201 | 0.1716 | -0.21 |
| 4886 Ubiquitin-conjugating enzyme E2 Z                                   | Q9H832     | 0.0070              | 0.0492              | 0.16                | 0.3498              | 0.7048              | 0.15                | 0.0036              | 0.0314              | 0.29       | 0.0195 | 0.0594 | 0.07  | 0.0045 | 0.0499 | -0.11 | 0.0012 | 0.0486 | 0.24  | 0.0628 | 0.1974 | 0.32  | 0.4098 | 0.7968 | -0.07 | 0.3966 | 0.4681 | -0.05 |
| 4887 Ubiquitin-fold modifier 1                                           | P61969     | 0.0038              | 0.0390              | 0.21                | 0.0212              | 0.4754              | -0.50               | 0.0245              | 0.0734              | -0.25      | 0.0008 | 0.0000 | -0.54 | 0.0011 | 0.0066 | -0.45 | 0.0060 | 0.0624 | 0.32  | 0.0313 | 0.1406 | -0.84 | 0.0000 | 0.0000 | -0.50 | 0.0000 | 0.0000 | -1.16 |
| 4888 Ubiquitin-fold modifier-conjugating enzyme 1                        | Q9Y3C8     | 0.5339              | 0.5405              | -0.07               | 0.2908              | 0.6717              | 0.17                | 0.5836              | 0.6401              | -0.05      | 0.6526 | 0.6963 | -0.03 | 0.7330 | 0.7909 | -0.02 | 0.3899 | 0.4247 | -0.10 | 0.3736 | 0.4927 | -2.55 | 0.8708 | 1.0201 | -0.33 | 0.0651 | 0.1376 | -2.06 |
| 4889 Ubiquitin-like domain-containing CTD phosphatase 1                  | Q8WYV7     | 0.4152              | 0.4931              | 0.04                | 0.6299              | 0.7265              | -0.05               | 0.1959              | 0.3452              | -0.27      | 0.9175 | 0.9283 | -0.01 | 0.0667 | 0.0593 | -0.26 | 0.0917 | 0.2214 | 0.11  | 0.0760 | 0.2194 | 0.29  | 0.1108 | 0.3400 | 0.13  | 0.0968 | 0.0762 | -0.18 |
| 4890 Ubiquitin-like modifier-activating enzyme 1                         | P22314     | 0.0869              | 0.2049              | 0.15                | 0.1003              | 0.6697              | 0.24                | 0.0317              | 0.0911              | 0.22       | 0.0471 | 0.1104 | 0.21  | 0.5727 | 0.6526 | 0.04  | 0.0282 | 0.1073 | 0.28  | 0.0195 | 0.1293 | 0.44  | 0.1366 | 0.3905 | 0.17  | 0.351  |        |       |

Supplementary Table S2. Overview on all relatively quantified 5180 proteins statistical analysis

|                                                                           |         | MCF-7               |            |                     |         | MDA-MB-231          |        |                     |            |                     |         |                     |        |        |        |        |        |        |        |        |        |        |        |        |        |        |        |       |
|---------------------------------------------------------------------------|---------|---------------------|------------|---------------------|---------|---------------------|--------|---------------------|------------|---------------------|---------|---------------------|--------|--------|--------|--------|--------|--------|--------|--------|--------|--------|--------|--------|--------|--------|--------|-------|
|                                                                           |         | Dai SC20 vs control |            | Gen SC20 vs control |         | SSE SC20 vs control |        | Dai IC20 vs control |            | Gen IC20 vs control |         | SSE IC20 vs control |        |        |        |        |        |        |        |        |        |        |        |        |        |        |        |       |
| Protein name                                                              | UniProt | p value             | BH q value | log2FC              | p value | BH q value          | log2FC | p value             | BH q value | log2FC              | p value | BH q value          | log2FC |        |        |        |        |        |        |        |        |        |        |        |        |        |        |       |
| 4934 Uncharacterized protein KIAA1841                                     | Q6NS18  | 0.4108              | 0.4954     | -3.31               | 0.5752  | 0.6937              | -1.75  | 0.5661              | 0.6320     | -1.19               | 0.5388  | 0.5980              | 0.89   | 0.2938 | 0.3977 | -1.88  | 0.9510 | 0.9707 | 0.09   | 0.0111 | 0.1029 | -0.37  | 0.6602 | 1.1007 | 0.03   | 0.1097 | 0.1667 | -0.16 |
| 4935 Uncharacterized protein KIAA1958                                     | Q8HNK9  | 0.4108              | 0.4953     | -3.31               | 0.5752  | 0.6936              | -1.75  | 0.5661              | 0.6318     | -1.19               | 0.5388  | 0.5979              | 0.89   | 0.2938 | 0.3976 | -1.88  | 0.9510 | 0.9705 | 0.09   | 0.0244 | 0.8517 | -0.03  | 0.0555 | 0.2246 | 0.36   | 0.1495 | 0.2122 | 0.41  |
| 4936 Uncharacterized protein KIAA2026                                     | Q5HYC2  | 0.3415              | 0.5490     | -0.07               | 0.2669  | 0.6628              | 0.13   | 0.1355              | 0.2584     | 0.13                | 0.0551  | 0.0895              | 0.26   | 0.7021 | 0.7634 | -0.03  | 0.7992 | 1.0365 | 0.02   | 0.3736 | 0.4387 | -2.55  | 0.8708 | 0.9196 | -0.33  | 0.0651 | 0.1510 | 2.06  |
| 4937 Unconventional myosin-Ib                                             | Q13795  | 0.4089              | 0.5359     | -0.16               | 0.6306  | 0.7269              | -0.06  | 0.3630              | 0.5605     | -0.07               | 0.8336  | 0.5684              | 0.07   | 0.0297 | 0.1255 | -0.26  | 0.4010 | 0.4269 | 0.10   | 0.3736 | 0.4918 | -2.55  | 0.8708 | 1.0185 | -0.33  | 0.0651 | 0.1372 | 2.06  |
| 4938 Unconventional myosin-Ib                                             | Q9H179  | 0.0842              | 0.2003     | -0.07               | 0.3467  | 0.6445              | 0.01   | 0.1393              | 0.2637     | 0.04                | 0.0426  | 0.32                | 0.2351 | 0.4467 | 0.07   | 0.2998 | 0.4129 | 0.10   | 0.3736 | 0.4248 | -2.55  | 0.8708 | 0.9070 | -0.01  | 0.2792 | 0.3510 | -0.07  |       |
| 4939 Unconventional myosin-Ib                                             | Q9H432  | 0.7857              | 0.8259     | 0.01                | 0.9800  | 0.9913              | 0.00   | 0.1842              | 0.3289     | 0.08                | 0.9198  | 0.9297              | -0.01  | 0.2294 | 0.3949 | -0.08  | 0.2553 | 0.4454 | 0.07   | 0.3736 | 0.6271 | 0.06   | 0.0614 | 0.2366 | -0.25  | 0.0202 | 0.1220 | 0.41  |
| 4940 Unconventional myosin-Ib                                             | Q12965  | 0.6330              | 0.6950     | -0.21               | 0.8157  | 0.8682              | -0.11  | 0.5160              | 0.7361     | -0.29               | 0.4064  | 0.5975              | -0.39  | 0.4502 | 0.5435 | -0.39  | 0.5321 | 0.7629 | -0.28  | 0.0774 | 0.2215 | -0.13  | 0.0065 | 0.0658 | -0.29  | 0.2144 | 0.2832 | -0.06 |
| 4941 Unconventional myosin-Ib                                             | Q8N1T3  | 0.4108              | 0.4952     | -3.31               | 0.5752  | 0.6934              | -1.75  | 0.5661              | 0.6317     | -1.19               | 0.5388  | 0.5978              | 0.89   | 0.2938 | 0.3975 | -1.88  | 0.9510 | 0.9703 | 0.09   | 0.0834 | 0.2307 | 0.28   | 0.1567 | 0.4286 | -0.17  | 0.1555 | 0.2189 | 0.27  |
| 4942 Unconventional myosin-Dxa                                            | B2RTY4  | 0.6817              | 0.7383     | -0.03               | 0.0765  | 0.6144              | 0.24   | 0.5397              | 0.7618     | 0.05                | 0.0499  | 0.1148              | 0.18   | 0.2488 | 0.4658 | -0.08  | 0.5299 | 0.7604 | 0.04   | 0.3736 | 0.4584 | -2.55  | 0.8708 | 0.9565 | -0.33  | 0.0651 | 0.1229 | 2.06  |
| 4943 Unconventional myosin-Dxb                                            | Q13459  | 0.4108              | 0.4951     | -3.31               | 0.5752  | 0.6932              | -1.75  | 0.5661              | 0.6316     | -1.19               | 0.5388  | 0.5976              | 0.89   | 0.2938 | 0.3974 | -1.88  | 0.9510 | 0.9701 | 0.09   | 0.0737 | 0.2153 | 0.20   | 0.0374 | 0.1760 | 0.17   | 0.0690 | 0.1165 | 0.14  |
| 4944 Unconventional myosin-Va                                             | Q9Y411  | 0.2993              | 0.4982     | -0.09               | 0.1372  | 0.6508              | 0.14   | 0.8144              | 0.8497     | 0.02                | 0.0316  | 0.0833              | 0.26   | 0.4013 | 0.4977 | 0.08   | 0.1613 | 0.3226 | -0.13  | 0.3736 | 0.5117 | -2.55  | 0.8708 | 1.0549 | -0.33  | 0.0651 | 0.1463 | 2.06  |
| 4945 Unconventional myosin-Vb                                             | Q9ULV0  | 0.0033              | 0.0375     | 0.32                | 0.0581  | 0.5867              | 0.33   | 0.0055              | 0.0361     | 0.33                | 0.0058  | 0.0306              | 0.25   | 0.0314 | 0.1299 | 0.13   | 0.0181 | 0.0372 | 0.22   | 0.7089 | 0.7500 | -0.01  | 0.0983 | 0.3139 | -0.11  | 0.0535 | 0.2039 | -0.07 |
| 4946 Unconventional myosin-Vc                                             | Q9NQX4  | 0.4108              | 0.4950     | -3.31               | 0.5752  | 0.6931              | -1.75  | 0.5661              | 0.6314     | -1.19               | 0.5388  | 0.5975              | 0.89   | 0.2938 | 0.3973 | -1.88  | 0.9510 | 0.9699 | 0.09   | 0.2522 | 0.5780 | -0.07  | 0.5657 | 0.9933 | -0.07  | 0.1102 | 0.1671 | -0.16 |
| 4947 Unconventional myosin-VI                                             | Q9ULM4  | 0.8687              | 0.8960     | -0.01               | 0.4791  | 0.8045              | -0.12  | 0.8886              | 0.9117     | 0.01                | 0.1239  | 0.2274              | 0.08   | 0.2247 | 0.3335 | -0.06  | 0.0440 | 0.1381 | 0.16   | 0.2133 | 0.1341 | 0.30   | 0.0002 | 0.0162 | 0.23   | 0.0604 | 0.2196 | 0.31  |
| 4948 Unconventional myosin-VIb                                            | Q6PIE6  | 0.4108              | 0.4949     | -3.31               | 0.5752  | 0.6929              | -1.75  | 0.5661              | 0.6313     | -1.19               | 0.5388  | 0.5974              | 0.89   | 0.2938 | 0.3972 | -1.88  | 0.9510 | 0.9697 | 0.09   | 0.0971 | 0.9975 | 0.00   | 0.1392 | 0.3957 | 0.10   | 0.0076 | 0.0784 | 0.28  |
| 4949 Unconventional myosin-VIIIb                                          | Q18UIG5 | 0.3719              | 0.5864     | -0.11               | 0.4875  | 0.8109              | 0.09   | 0.2139              | 0.3684     | -0.17               | 0.0973  | 0.1903              | -0.26  | 0.9289 | 0.9463 | 0.01   | 0.1409 | 0.2947 | -0.22  | 0.3736 | 0.5195 | -2.55  | 0.8708 | 1.0692 | -0.33  | 0.0651 | 0.1500 | 2.06  |
| 4950 UPF0160 protein MYG1 mitochondrial                                   | Q9H1B07 | 0.0473              | 0.5462     | 0.05                | 0.0219  | 0.6602              | 0.21   | 0.6806              | 0.7304     | -0.07               | 0.7011  | 0.1480              | 0.13   | 0.3208 | 0.4178 | -0.06  | 0.0671 | 0.1819 | 0.13   | 0.6421 | 0.6688 | -0.05  | 0.2343 | 0.5339 | 0.14   | 0.0400 | 0.1731 | -0.17 |
| 4951 UPF0487 protein C5orf33                                              | Q9H1T9  | 0.0011              | 0.2604     | 0.11                | 0.1814  | 0.6445              | 0.01   | 0.1393              | 0.2637     | 0.04                | 0.0426  | 0.32                | 0.2351 | 0.4467 | 0.07   | 0.2998 | 0.4129 | 0.10   | 0.3736 | 0.4248 | -2.55  | 0.8708 | 0.9070 | -0.01  | 0.2792 | 0.3510 | -0.07  |       |
| 4952 UPF0487 protein C5orf33                                              | Q9H1T9  | 0.0011              | 0.2604     | 0.11                | 0.1814  | 0.6445              | 0.01   | 0.1393              | 0.2637     | 0.04                | 0.0426  | 0.32                | 0.2351 | 0.4467 | 0.07   | 0.2998 | 0.4129 | 0.10   | 0.3736 | 0.4248 | -2.55  | 0.8708 | 0.9070 | -0.01  | 0.2792 | 0.3510 | -0.07  |       |
| 4953 UPF0487 protein C5orf33                                              | Q9H1T9  | 0.0011              | 0.2604     | 0.11                | 0.1814  | 0.6445              | 0.01   | 0.1393              | 0.2637     | 0.04                | 0.0426  | 0.32                | 0.2351 | 0.4467 | 0.07   | 0.2998 | 0.4129 | 0.10   | 0.3736 | 0.4248 | -2.55  | 0.8708 | 0.9070 | -0.01  | 0.2792 | 0.3510 | -0.07  |       |
| 4954 UPF0600 protein C5orf51                                              | Q6NDU8  | 0.5407              | 0.6109     | 0.05                | 0.0103  | 0.4446              | 0.29   | 0.0944              | 0.1954     | -0.18               | 0.2188  | 0.3573              | -0.09  | 0.1144 | 0.2765 | 0.17   | 0.7169 | 0.9569 | -0.03  | 0.0490 | 0.1765 | -0.41  | 0.0787 | 0.2751 | -0.35  | 0.6314 | 0.6883 | -0.05 |
| 4955 UPF0687 protein C20orf27                                             | Q9GZN8  | 0.0568              | 0.1562     | -0.14               | 0.0158  | 0.4572              | -0.23  | 0.0109              | 0.0485     | -0.26               | 0.0600  | 0.0311              | -0.34  | 0.0319 | 0.0842 | -0.28  | 0.0555 | 0.1608 | -0.42  | 0.1155 | 0.2823 | 0.08   | 0.3609 | 0.7286 | -0.04  | 0.1444 | 0.2062 | -0.08 |
| 4956 UPF0711 protein C18orf21                                             | Q32NCO  | 0.4108              | 0.4948     | -3.31               | 0.5752  | 0.6928              | -1.75  | 0.5661              | 0.6312     | -1.19               | 0.5388  | 0.5973              | 0.89   | 0.2938 | 0.3970 | -1.88  | 0.9510 | 0.9695 | 0.09   | 0.0004 | 0.0334 | 1.00   | 0.0000 | 0.0000 | 1.61   | 0.0216 | 0.1257 | 0.41  |
| 4957 Up-regulated during skeletal muscle growth protein 5                 | Q96IX5  | 0.0175              | 0.0772     | 0.14                | 0.2572  | 0.6632              | 0.17   | 0.0563              | 0.1357     | 0.10                | 0.0982  | 0.1273              | 0.11   | 0.0082 | 0.0652 | 0.18   | 0.0297 | 0.1106 | 0.15   | 0.0741 | 0.2161 | 0.17   | 0.2746 | 0.6102 | 0.13   | 0.0443 | 0.0840 | -0.24 |
| 4957 Up-regulator of cell proliferation                                   | Q8TCY9  | 0.0014              | 0.0250     | -0.43               | 0.0570  | 0.5847              | -0.46  | 0.1273              | 0.2472     | -0.14               | 0.0003  | 0.0101              | -0.87  | 0.0086 | 0.0666 | -0.30  | 0.1140 | 0.2565 | -0.46  | 0.3736 | 0.5299 | -2.55  | 0.8708 | 1.0880 | -0.33  | 0.0651 | 0.1550 | 2.06  |
| 4958 Upstream-binding factor 1-like protein 1                             | POCB47  | 0.2073              | 0.2737     | 0.27                | 0.5324  | 0.8499              | -0.11  | 0.9613              | 0.9686     | 0.01                | 0.0789  | 0.1624              | -0.06  | 0.0796 | 0.5057 | -0.39  | 0.2313 | 0.4149 | -0.24  | 0.3736 | 0.4947 | -2.55  | 0.8708 | 1.0238 | -0.33  | 0.0651 | 0.1385 | 2.06  |
| 4959 Uracil-DNA glycosylase                                               | P13051  | 0.0014              | 0.0249     | -0.25               | 0.0598  | 0.6634              | -0.15  | 0.0034              | 0.0312     | -0.17               | 0.0093  | 0.0388              | -0.36  | 0.0001 | 0.0094 | -0.35  | 0.1348 | 0.2871 | -0.42  | 0.3736 | 0.5223 | -2.55  | 0.8708 | 1.0742 | -0.33  | 0.0651 | 0.1514 | 2.06  |
| 4960 Uracine-5-monophosphate synthase                                     | P11172  | 0.8196              | 0.8547     | -0.01               | 0.1230  | 0.6403              | -0.17  | 0.0166              | 0.0612     | -0.30               | 0.0106  | 0.0413              | -0.32  | 0.0026 | 0.0393 | -0.51  | 0.0209 | 0.0937 | -0.28  | 0.1435 | 0.3260 | -0.34  | 0.8701 | 1.3121 | 0.03   | 0.2205 | 0.2900 | -0.20 |
| 4961 Uridine phosphorylase 1                                              | Q16831  | 0.4108              | 0.4946     | -3.31               | 0.5752  | 0.6926              | -1.75  | 0.5661              | 0.6310     | -1.19               | 0.5388  | 0.5971              | 0.89   | 0.2938 | 0.3969 | -1.88  | 0.9510 | 0.9693 | 0.09   | 0.0829 | 0.2300 | 0.19   | 0.5826 | 1.0144 | 0.05   | 0.1466 | 0.2297 | -0.11 |
| 4962 Uridine-cytidine kinase 2                                            | Q9HBX22 | 0.3387              | 0.5467     | -0.24               | 0.0356  | 0.5376              | -0.10  | 0.2203              | 0.3772     | -0.17               | 0.0426  | 0.1026              | -0.42  | 0.0039 | 0.0461 | -0.20  | 0.0035 | 0.0596 | -0.24  | 0.0500 | 0.1785 | -0.17  | 0.0107 | 0.0847 | -0.19  | 0.0334 | 0.1566 | -0.26 |
| 4963 Uridine-thymidine phosphorylase                                      | Q9H132  | 0.0310              | 0.1087     | 0.08                | 0.0162  | 0.8785              | -0.04  | 0.6760              | 0.7262     | -0.03               | 0.1032  | 0.18                | 0.0603 | 0.1946 | 0.17   | 0.0787 | 0.0937 | 0.10   | 0.0475 | 0.1289 | 0.07   | 0.0554 | 0.1698 | 0.07   | 0.0354 | 0.1498 | 0.28   |       |
| 4964 Uridine-thymidine phosphorylase                                      | Q16831  | 0.0126              | 0.0655     | -0.19               | 0.2400  | 0.6581              | -0.08  | 0.9451              | 0.9571     | 0.00                | 0.4179  | 0.6100              | -0.04  | 0.7872 | 0.8329 | -0.01  | 0.8545 | 1.0897 | 0.01   | 0.0193 | 0.1287 | -0.28  | 0.3707 | 0.7428 | 0.07   | 0.5913 | 0.6527 | 0.04  |
| 4965 Urothrin                                                             | P46939  | 0.4108              | 0.4945     | -3.31               | 0.5752  | 0.6924              | -1.75  | 0.5661              | 0.6309     | -1.19               | 0.5388  | 0.5970              | 0.89   | 0.2938 | 0.3968 | -1.88  | 0.9510 | 0.9691 | 0.09   | 0.2494 | 0.4851 | 0.18   | 0.1761 | 0.4609 | -0.12  | 0.0599 | 0.2187 | -0.23 |
| 4966 UV excision repair protein RAD23 homolog A                           | P54725  | 0.6765              | 0.7337     | -0.12               | 0.5725  | 0.8850              | -0.19  | 0.0575              | 0.1373     | 0.80                | 0.0170  | 0.0544              | -1.25  | 0.0247 | 0.1137 | -1.38  | 0.0279 | 0.1069 | -1.11  | 0.3736 | 0.5824 | -2.55  | 0.8708 | 1.1818 | -0.33  | 0.0651 | 0.1827 | 2.06  |
| 4967 UV excision repair protein RAD23 homolog B                           | P54727  | 0.5138              | 0.5864     | 0.04                | 0.2455  | 0.6582              | 0.23   | 0.0221              | 0.0725     | 0.25                | 0.0472  | 0.1106              | 0.18   | 0.7398 | 0.7965 | -0.02  | 0.0621 | 0.1733 | 0.19   | 0.1062 | 0.2665 | 0.35   | 0.5439 | 0.9698 | -0.05  | 0.6566 | 0.7118 | 0.03  |
| 4968 Uveal autotransmembrane with coiled-coil domains and ankyrin repeats | Q9H2B9  | 0.0093              | 0.0569     | 0.10                | 0.1561  | 0.6633              | 0.15   | 0.0746              | 0.1637     | 0.13                | 0.0015  | 0.0171              | 0.17   | 0.0008 | 0.0222 | 0.15   | 0.1591 | 0.3193 | 0.05   | 0.3736 | 0.5124 | -2.55  | 0.8708 | 1.0561 | -0.33  | 0.0651 | 0.1466 | 2.06  |
| 4969 Vacuolar fusion protein CCZ1 homolog B                               | P86790  | 0.0064              | 0.0478     | -0.17               | 0.9323  | 0.9544              | -0.01  | 0.2276              | 0.3688     | -0.17               | 0.0932  | 0.1838              | -0.10  | 0.3029 | 0.4007 | -0.15  | 0.0100 | 0.0702 | -0.18  | 0.3736 | 0.6130 | -2.55  | 0.8708 | 1.2355 | -0.33  | 0.0651 | 0.2007 | 2.06  |
| 4970 Vacuolar fusion protein MON1 homolog A                               | Q86VX9  | 0.4108              | 0.4948     | -3.31               | 0.5752  | 0.6923              | -1.75  | 0.5661              | 0.6308     | -1.19               | 0.5388  | 0.5969              | 0.89   | 0.2938 | 0.3967 | -1.88  | 0.9510 | 0.9690 | 0.09   | 0.0019 | 0.0521 | -0.92  | 0.0009 | 0.0266 | 0.85   | 0.0069 | 0.0772 | 0.71  |
| 4971 Vacuolar fusion protein MON1 homolog B                               | Q7L1V2  | 0.0133              | 0.0671     | 0.65                | 0.0800  | 0.6121              | -0.33  | 0.3927              | 0.5944     | -0.13               | 0.0650  | 0.1402              | 0.36   | 0.0710 | 0.2030 | 0.35   | 0.0746 | 0.1943 | 0.39   | 0.3736 | 0.5473 | -2.55  | 0.8708 | 1.1193 | -0.33  | 0.0651 | 0.1638 | 2.06  |
| 4972 Vacuolar protein sorting-associated protein 11 homolog               |         |                     |            |                     |         |                     |        |                     |            |                     |         |                     |        |        |        |        |        |        |        |        |        |        |        |        |        |        |        |       |

Supplementary Table S2. Overview on all relatively quantified 5180 proteins statistical analysis

| Protein name                                                              | UniProt    | MCF-7               |                     |                     |                     | MDA-MB-231          |                     |                     |                     |            |        |        |       |        |        |       |        |        |       |        |        |       |        |        |       |        |        |       |
|---------------------------------------------------------------------------|------------|---------------------|---------------------|---------------------|---------------------|---------------------|---------------------|---------------------|---------------------|------------|--------|--------|-------|--------|--------|-------|--------|--------|-------|--------|--------|-------|--------|--------|-------|--------|--------|-------|
|                                                                           |            | Dai SC20 vs control | Gen SC20 vs control | SSE SC20 vs control | Dai IC20 vs control | Gen IC20 vs control | SSE IC20 vs control | Dai IC20 vs control | Gen IC20 vs control |            |        |        |       |        |        |       |        |        |       |        |        |       |        |        |       |        |        |       |
| p value                                                                   | BH q value | log2FC              | p value             | BH q value          | log2FC              | p value             | BH q value          | log2FC              | p value             | BH q value | log2FC |        |       |        |        |       |        |        |       |        |        |       |        |        |       |        |        |       |
| 5011 Vesicle-trafficking protein SEC22a                                   | Q96W7      | 0.0422              | 0.1301              | -0.24               | 0.1275              | 0.6412              | -0.19               | 0.5212              | 0.7421              | 0.08       | 0.1351 | 0.2437 | -0.11 | 0.7517 | 0.8058 | 0.03  | 0.1632 | 0.3256 | 0.22  | 0.3736 | 0.5113 | -2.55 | 0.8708 | 1.0542 | -0.33 | 0.0651 | 0.1461 | 2.06  |
| 5012 Vesicle-trafficking protein SEC22b                                   | Q75396     | 0.0261              | 0.0977              | 0.12                | 0.2176              | 0.6607              | 0.21                | 0.0018              | 0.0240              | 0.26       | 0.0018 | 0.0189 | 0.26  | 0.1121 | 0.2729 | 0.07  | 0.0057 | 0.0614 | 0.34  | 0.6461 | 0.6908 | 0.05  | 0.9089 | 0.9325 | -0.01 | 0.3515 | 0.4229 | -0.10 |
| 5013 Vesicular integral-membrane protein VIP36                            | Q12907     | 0.0005              | 0.0173              | 0.31                | 0.0994              | 0.6365              | 0.20                | 0.0011              | 0.0222              | 0.20       | 0.0001 | 0.0096 | 0.29  | 0.0054 | 0.0551 | -0.11 | 0.0430 | 0.1368 | 0.28  | 0.4795 | 0.5340 | -0.04 | 0.0851 | 0.2889 | -0.13 | 0.0567 | 0.2119 | -0.16 |
| 5014 Viginin                                                              | Q00341     | 0.9851              | 0.9889              | 0.00                | 0.2811              | 0.6652              | 0.21                | 0.0056              | 0.0365              | 0.27       | 0.0049 | 0.0082 | 0.29  | 0.1542 | 0.3336 | 0.08  | 0.0324 | 0.1160 | 0.20  | 0.0761 | 0.2194 | 0.39  | 0.8435 | 1.2870 | -0.01 | 0.8982 | 0.9190 | -0.01 |
| 5015 Vincristin                                                           | P08670     | 0.2734              | 0.4665              | -0.14               | 0.4273              | 0.7637              | -0.11               | 0.6529              | 0.7044              | -0.06      | 0.1040 | 0.1995 | 0.25  | 0.2655 | 0.4872 | -0.14 | 0.4694 | 0.6917 | 0.20  | 0.0046 | 0.0729 | 0.87  | 0.0074 | 0.0710 | 0.48  | 0.0008 | 0.0351 | 2.04  |
| 5016 Vinculin                                                             | P18206     | 0.0011              | 0.0223              | 0.16                | 0.3667              | 0.7154              | 0.17                | 0.0059              | 0.0371              | 0.35       | 0.0001 | 0.0084 | 0.36  | 0.0029 | 0.0415 | 0.12  | 0.0001 | 0.0324 | 0.43  | 0.1086 | 0.2695 | 0.28  | 0.6611 | 1.1011 | 0.05  | 0.2776 | 0.3495 | -0.09 |
| 5017 Vitamin D-binding protein                                            | Q02774     | 0.0354              | 0.1175              | -0.26               | 0.0200              | 0.4731              | 0.14                | 0.2919              | 0.4722              | 0.12       | 0.0377 | 0.0941 | 0.11  | 0.0040 | 0.0469 | 0.35  | 0.2002 | 0.3768 | -0.06 | 0.3736 | 0.5024 | -2.55 | 0.8708 | 1.0379 | -0.33 | 0.0651 | 0.1420 | 2.06  |
| 5018 Vitamin K epoxide reductase complex subunit 1                        | Q9BQB6     | 0.5798              | 0.6473              | 0.03                | 0.3155              | 0.6810              | 0.15                | 0.6821              | 0.7314              | 0.05       | 0.0504 | 0.1156 | 0.14  | 0.3082 | 0.4058 | 0.05  | 0.1996 | 0.3760 | 0.09  | 0.3506 | 0.6256 | -0.09 | 0.2501 | 0.5730 | -0.14 | 0.0231 | 0.1291 | -0.31 |
| 5019 Vitronectin                                                          | P04004     | 0.4108              | 0.4938              | -3.31               | 0.5752              | 0.6915              | -1.75               | 0.5661              | 0.6301              | -1.19      | 0.5388 | 0.5962 | 0.89  | 0.2938 | 0.3962 | -1.88 | 0.9510 | 0.9680 | 0.09  | 0.3652 | 0.6456 | -0.47 | 0.8428 | 1.2871 | -0.09 | 0.6303 | 0.6875 | -0.22 |
| 5020 Voltage-dependent anion-selective channel protein 1                  | P21796     | 0.0056              | 0.0450              | 0.38                | 0.2146              | 0.6609              | 0.19                | 0.0006              | 0.0192              | 0.51       | 0.0011 | 0.0163 | 0.21  | 0.0787 | 0.2164 | 0.08  | 0.0056 | 0.0617 | 0.47  | 0.0774 | 0.2218 | 0.08  | 0.0297 | 0.1556 | 0.15  | 0.0122 | 0.0950 | -0.13 |
| 5021 Voltage-dependent anion-selective channel protein 2                  | P45880     | 0.0040              | 0.0398              | 0.18                | 0.7894              | 0.8484              | -0.02               | 0.0092              | 0.0448              | 0.21       | 0.0054 | 0.0295 | 0.04  | 0.5143 | 0.6031 | -0.01 | 0.0955 | 0.2277 | 0.23  | 0.3897 | 0.4456 | 0.10  | 0.3677 | 0.6943 | 0.09  | 0.0274 | 0.1416 | -0.26 |
| 5022 Voltage-dependent anion-selective channel protein 3                  | Q9Y277     | 0.5644              | 0.6324              | -0.03               | 0.1247              | 0.6421              | -0.15               | 0.5118              | 0.7328              | 0.02       | 0.0332 | 0.0862 | -0.12 | 0.0291 | 0.1242 | -0.15 | 0.3965 | 0.6100 | 0.05  | 0.4023 | 0.4582 | 0.06  | 0.0580 | 0.2300 | 0.17  | 0.1125 | 0.3840 | -0.14 |
| 5023 Voltage-dependent calcium channel subunit alpha-2/delta-3            | Q8IZS8     | 0.0013              | 0.0242              | 0.19                | 0.3253              | 0.6858              | 0.18                | 0.0036              | 0.0314              | 0.24       | 0.0008 | 0.0147 | 0.25  | 0.0313 | 0.1297 | 0.09  | 0.0015 | 0.0505 | 0.25  | 0.4526 | 0.5075 | -0.10 | 0.4449 | 0.1966 | -0.35 | 0.0300 | 0.1476 | -0.43 |
| 5024 Voltage-dependent L-type calcium channel subunit alpha-1C            | Q13936     | 0.3291              | 0.5359              | -0.06               | 0.5907              | 0.6959              | 0.05                | 0.8508              | 0.8809              | 0.01       | 0.3106 | 0.4788 | -0.06 | 0.4969 | 0.5861 | 0.05  | 0.3484 | 0.5534 | 0.10  | 0.3736 | 0.4744 | -2.55 | 0.8708 | 0.9864 | -0.33 | 0.0651 | 0.1296 | 2.06  |
| 5025 Voltage-dependent L-type calcium channel subunit beta-1              | Q02641     | 0.4108              | 0.4937              | -3.31               | 0.5752              | 0.6913              | -1.75               | 0.5661              | 0.6299              | -1.19      | 0.5388 | 0.5961 | 0.89  | 0.2938 | 0.3961 | -1.88 | 0.9510 | 0.9678 | 0.09  | 0.1629 | 0.3568 | -0.20 | 0.0636 | 0.2421 | -0.14 | 0.1772 | 0.2433 | -0.05 |
| 5026 Voltage-dependent T-type calcium channel subunit alpha-11            | Q9P0X4     | 0.0060              | 0.0464              | 0.29                | 0.0618              | 0.5906              | 0.22                | 0.0597              | 0.1415              | 0.48       | 0.0030 | 0.0222 | 0.50  | 0.0222 | 0.1077 | 0.26  | 0.0007 | 0.0412 | 0.62  | 0.3736 | 0.6507 | -2.55 | 0.8708 | 1.3007 | -0.33 | 0.0651 | 0.2253 | 2.06  |
| 5027 von Willebrand factor A domain-containing protein 3B                 | Q502W6     | 0.0231              | 0.0909              | 0.39                | 0.5078              | 0.8298              | 0.11                | 0.0132              | 0.0536              | 0.52       | 0.0174 | 0.0553 | 0.45  | 0.0077 | 0.0635 | 0.53  | 0.0162 | 0.0845 | 0.45  | 0.0390 | 0.1638 | 0.19  | 0.0485 | 0.2061 | -0.20 | 0.5079 | 0.5743 | 0.02  |
| 5028 VPS9 domain-containing protein 1                                     | Q9Y2B5     | 0.0577              | 0.1581              | 0.34                | 0.0168              | 0.4604              | 0.54                | 0.0154              | 0.0584              | 0.24       | 0.0510 | 0.1335 | 0.34  | 0.0397 | 0.1461 | 0.40  | 0.1150 | 0.2580 | 0.24  | 0.0741 | 0.2160 | 0.30  | 0.0477 | 0.2039 | -0.26 | 0.0049 | 0.0675 | -0.27 |
| 5029 V-set and transmembrane domain-containing protein 4                  | Q8RW00     | 0.2393              | 0.4238              | -0.15               | 0.4580              | 0.7900              | -0.23               | 0.0367              | 0.1006              | 0.35       | 0.0815 | 0.1663 | 0.27  | 0.0139 | 0.0840 | 0.48  | 0.1157 | 0.2588 | 0.27  | 0.3736 | 0.5290 | -2.55 | 0.8708 | 1.0864 | -0.33 | 0.0651 | 0.1546 | 2.06  |
| 5030 V-type proton ATPase 116 kDa subunit a isoform 1                     | Q93050     | 0.0926              | 0.2139              | 1.06                | 0.0201              | 0.6597              | 0.29                | 0.0777              | 0.1022              | 0.10       | 0.0030 | 0.0223 | 0.50  | 0.2005 | 0.4015 | -0.05 | 0.0675 | 0.1820 | 0.68  | 0.3736 | 0.5503 | -2.55 | 0.8708 | 1.1246 | -0.33 | 0.0651 | 0.1653 | 2.06  |
| 5031 V-type proton ATPase 116 kDa subunit a isoform 3                     | Q13488     | 0.0630              | 0.1661              | -0.15               | 0.0922              | 0.6309              | -0.19               | 0.7176              | 0.7628              | -0.03      | 0.5506 | 0.6016 | -0.05 | 0.4077 | 0.5033 | -0.05 | 0.1446 | 0.2999 | -0.11 | 0.3736 | 0.5181 | -2.55 | 0.8708 | 1.0666 | -0.33 | 0.0651 | 0.1493 | 2.06  |
| 5032 V-type proton ATPase catalytic subunit A                             | P38606     | 0.7283              | 0.7287              | -0.02               | 0.4768              | 0.8035              | 0.07                | 0.5110              | 0.7320              | 0.05       | 0.0429 | 0.1032 | 0.16  | 0.3057 | 0.4033 | 0.06  | 0.0171 | 0.0853 | 0.25  | 0.1800 | 0.3803 | -0.03 | 0.0089 | 0.0774 | 0.10  | 0.0414 | 0.1033 | 0.10  |
| 5033 V-type proton ATPase subunit B brain isoform                         | P21281     | 0.6760              | 0.7336              | 0.02                | 0.1494              | 0.6603              | 0.17                | 0.4659              | 0.6831              | 0.40       | 0.0612 | 0.1337 | 0.16  | 0.2720 | 0.4956 | 0.06  | 0.7083 | 0.9500 | -0.02 | 0.3927 | 0.4486 | 0.04  | 0.0718 | 0.2601 | -0.14 | 0.2097 | 0.2785 | -0.06 |
| 5034 V-type proton ATPase subunit E 1                                     | P36543     | 0.7416              | 0.7906              | 0.04                | 0.4673              | 0.7976              | -0.25               | 0.5556              | 0.7795              | -0.09      | 0.5025 | 0.7064 | 0.09  | 0.9165 | 0.9375 | 0.01  | 0.6534 | 0.8905 | 0.07  | 0.3874 | 0.4433 | -0.11 | 0.0098 | 0.0814 | -0.39 | 0.0504 | 0.1969 | -0.19 |
| 5035 V-type proton ATPase subunit E 2                                     | Q96A05     | 0.1198              | 0.2554              | -0.23               | 0.4003              | 0.7440              | 0.12                | 0.8029              | 0.8394              | -0.03      | 0.9190 | 0.9290 | 0.01  | 0.2496 | 0.4666 | 0.15  | 0.2766 | 0.4718 | 0.14  | 0.3736 | 0.4860 | -2.55 | 0.8708 | 1.0078 | -0.33 | 0.0651 | 0.1346 | 2.06  |
| 5036 V-type proton ATPase subunit G 1                                     | Q75348     | 0.0007              | 0.0193              | -0.18               | 0.4397              | 0.7760              | 0.05                | 0.5637              | 0.7879              | -0.01      | 0.0063 | 0.0317 | 0.11  | 0.0056 | 0.0556 | 0.14  | 0.0562 | 0.1621 | 0.10  | 0.2681 | 0.5109 | 0.14  | 0.0139 | 0.0981 | -0.53 | 0.0401 | 0.1732 | 0.32  |
| 5037 V-type proton ATPase subunit H                                       | Q9U112     | 0.1422              | 0.2886              | -0.17               | 0.6798              | 0.7658              | -0.04               | 0.7384              | 0.7812              | 0.03       | 0.6350 | 0.6803 | -0.05 | 0.6513 | 0.7189 | 0.04  | 0.0782 | 0.2000 | -0.23 | 0.0267 | 0.1421 | 0.49  | 0.0059 | 0.0616 | 0.23  | 0.0116 | 0.0939 | 0.20  |
| 5038 WAP four-disulfide core domain protein 8                             | Q8IUAO     | 0.4108              | 0.4936              | -3.31               | 0.5752              | 0.6911              | -1.75               | 0.5661              | 0.6298              | -1.19      | 0.5388 | 0.5960 | 0.89  | 0.2938 | 0.3960 | -1.88 | 0.9510 | 0.9676 | 0.09  | 0.0087 | 0.0929 | 0.73  | 0.0000 | 0.0000 | 1.97  | 0.0001 | 0.0305 | 1.65  |
| 5039 WAP_Kazal_ immunoglobulin_Kunitz and NTR domain-containing protein 2 | Q8TEU8     | 0.8161              | 0.8518              | -0.04               | 0.2882              | 0.6686              | -0.47               | 0.3674              | 0.5647              | 0.16       | 0.2002 | 0.3327 | -0.25 | 0.4341 | 0.5281 | -0.15 | 0.5138 | 0.7412 | -0.11 | 0.3285 | 0.5966 | -0.18 | 0.5460 | 0.9713 | 0.07  | 0.0124 | 0.0960 | 0.35  |
| 5040 WASH complex subunit 1                                               | AK8Q23     | 0.4108              | 0.4935              | -3.31               | 0.5752              | 0.6910              | -1.75               | 0.5661              | 0.6297              | -1.19      | 0.5388 | 0.5959 | 0.89  | 0.2938 | 0.3959 | -1.88 | 0.9510 | 0.9674 | 0.09  | 0.0280 | 0.2286 | 0.25  | 0.0498 | 0.2099 | 0.57  | 0.0157 | 0.1074 | 0.40  |
| 5041 WASH complex subunit 2A                                              | Q641Q2     | 0.0189              | 0.0809              | -0.18               | 0.4282              | 0.5707              | -0.06               | 0.9188              | 0.9358              | -0.01      | 0.8143 | 0.8398 | -0.02 | 0.1644 | 0.3493 | -0.03 | 0.1392 | 0.2928 | -0.08 | 0.2868 | 0.4668 | 0.19  | 0.2507 | 0.5736 | 0.18  | 0.1162 | 0.1740 | 0.31  |
| 5042 WASH complex subunit 2C                                              | Q9Y4E1     | 0.0223              | 0.0888              | -0.53               | 0.3649              | 0.7153              | -0.57               | 0.0880              | 0.1857              | -0.33      | 0.0709 | 0.1491 | -0.26 | 0.0601 | 0.1845 | -0.38 | 0.0503 | 0.1506 | -0.21 | 0.3736 | 0.5605 | -2.55 | 0.8708 | 1.1428 | -0.33 | 0.0651 | 0.1707 | 2.06  |
| 5043 WASH complex subunit 2D                                              | SSRD80     | 0.4108              | 0.4934              | -3.31               | 0.5752              | 0.6908              | -1.75               | 0.5661              | 0.6295              | -1.19      | 0.5388 | 0.5957 | 0.89  | 0.2938 | 0.3958 | -1.88 | 0.9510 | 0.9672 | 0.09  | 0.4759 | 0.5304 | -0.13 | 0.0887 | 0.2951 | 0.11  | 0.0085 | 0.0823 | 0.41  |
| 5044 WASH complex subunit 4                                               | Q2M899     | 0.4108              | 0.4933              | -3.31               | 0.5752              | 0.6907              | -1.75               | 0.5661              | 0.6294              | -1.19      | 0.5388 | 0.5956 | 0.89  | 0.2938 | 0.3957 | -1.88 | 0.9510 | 0.9671 | 0.09  | 0.3767 | 0.6075 | 0.26  | 0.0002 | 0.0150 | 2.71  | 0.0172 | 0.1121 | 0.75  |
| 5045 WASH complex subunit 5                                               | Q12768     | 0.8558              | 0.8857              | -0.02               | 0.2338              | 0.6614              | 0.13                | 0.0125              | 0.0524              | 0.41       | 0.0242 | 0.0691 | 0.35  | 0.2264 | 0.4356 | 0.12  | 0.0806 | 0.2042 | 0.30  | 0.3736 | 0.5435 | -2.55 | 0.8708 | 1.1124 | -0.33 | 0.0651 | 0.1618 | 2.06  |
| 5046 WD repeat and FYVE domain-containing protein 2                       | Q96P53     | 0.0881              | 0.2066              | -0.14               | 0.2038              | 0.6841              | 0.12                | 0.1139              | 0.2265              | -0.15      | 0.0194 | 0.0592 | 0.23  | 0.0167 | 0.0923 | 0.28  | 0.0133 | 0.0767 | 0.25  | 0.3736 | 0.6063 | -2.55 | 0.8708 | 1.2238 | -0.33 | 0.0651 | 0.1966 | 2.06  |
| 5047 WD repeat and HMG-box DNA-binding protein 1                          | Q75717     | 0.4108              | 0.4932              | -3.31               | 0.5752              | 0.6905              | -1.75               | 0.5661              | 0.6293              | -1.19      | 0.5388 | 0.5955 | 0.89  | 0.2938 | 0.3956 | -1.88 | 0.9510 | 0.9669 | 0.09  | 0.2483 | 0.4843 | 0.08  | 0.5302 | 0.9533 | 0.05  | 0.7660 | 0.8075 | -0.02 |
| 5048 WD repeat and SOCS domain-containing protein 2                       | Q9NYS7     | 0.2096              | 0.3822              | 0.10                | 0.1646              | 0.6610              | 0.20                | 0.1447              | 0.2714              | 0.22       | 0.0438 | 0.1047 | 0.21  | 0.6089 | 0.6831 | -0.04 | 0.7858 | 1.0240 | 0.02  | 0.3736 | 0.4398 | -2.55 | 0.8708 | 0.9217 | -0.33 | 0.0651 | 0.1154 | 2.06  |
| 5049 WD repeat-containing protein 1                                       | Q75083     | 0                   |                     |                     |                     |                     |                     |                     |                     |            |        |        |       |        |        |       |        |        |       |        |        |       |        |        |       |        |        |       |

Supplementary Table S2. Overview on all relatively quantified 5180 proteins statistical analysis

|      | Protein name                                        | UniProt | MCF-7               |            |                     |         | MDA-MB-231          |            |                     |         |
|------|-----------------------------------------------------|---------|---------------------|------------|---------------------|---------|---------------------|------------|---------------------|---------|
|      |                                                     |         | Dai SC20 vs control |            | Gen SC20 vs control |         | Dai IC20 vs control |            | Gen IC20 vs control |         |
|      |                                                     |         | p value             | BH q value | log2FC              | p value | p value             | BH q value | log2FC              | p value |
| 5090 | Zinc finger CCH domain-containing protein 4         | Q9UPT8  | 0.0112              | 0.0607     | -0.29               | 0.6911  | 0.7739              | -0.04      | 0.2083              | 0.3618  |
| 5091 | Zinc finger CCH domain-containing protein 6         | P61129  | 0.0145              | 0.0697     | -0.40               | 0.0951  | 0.6308              | -0.57      | 0.1815              | 0.4880  |
| 5092 | Zinc finger CCH domain-containing protein 7A        | Q8W1R0  | 0.4652              | 0.5414     | 0.20                | 0.9983  | 0.9985              | 0.00       | 0.0014              | 0.0220  |
| 5093 | Zinc finger CCH domain-containing protein 7B        | Q9UGR2  | 0.0093              | 0.0568     | -0.10               | 0.7046  | 0.7826              | 0.06       | 0.4950              | 0.7166  |
| 5094 | Zinc finger CCH domain-containing protein 8         | Q8NSP1  | 0.4108              | 0.4919     | -3.31               | 0.5752  | 0.6888              | -1.75      | 0.5661              | 0.6276  |
| 5095 | Zinc finger CCH-type antiviral protein 1            | Q727W4  | 0.0027              | 0.0347     | -0.12               | 0.6440  | 0.7375              | -0.01      | 0.1913              | 0.3383  |
| 5096 | Zinc finger CCH-type antiviral protein 1-like       | Q9UHT9  | 0.4108              | 0.4918     | -3.31               | 0.5752  | 0.6886              | -1.75      | 0.5661              | 0.6277  |
| 5097 | Zinc finger CCH domain-containing protein 7         | Q8N3Z6  | 0.4108              | 0.4917     | -3.31               | 0.5752  | 0.6884              | -1.75      | 0.5661              | 0.6275  |
| 5098 | Zinc finger CCH domain-containing protein 8         | Q6NZY4  | 0.1832              | 0.3476     | 0.10                | 0.5720  | 0.8850              | -0.10      | 0.5413              | 0.6732  |
| 5099 | Zinc finger FYVE domain-containing protein 16       | Q7Z3T8  | 0.0041              | 0.0400     | 0.17                | 0.4349  | 0.7707              | 0.05       | 0.8195              | 0.8538  |
| 5100 | Zinc finger FYVE domain-containing protein 21       | Q9BG24  | 0.2139              | 0.3881     | 0.07                | 0.3002  | 0.6732              | -0.04      | 0.0608              | 0.1430  |
| 5101 | Zinc finger FYVE domain-containing protein 9        | Q95405  | 0.0075              | 0.0509     | 0.31                | 0.0013  | 0.2322              | 0.37       | 0.9651              | 0.9719  |
| 5102 | Zinc finger HIT domain-containing protein 2         | Q9UHR6  | 0.4108              | 0.4916     | -3.31               | 0.5752  | 0.6883              | -1.75      | 0.5661              | 0.6274  |
| 5103 | Zinc finger homeobox protein 3                      | Q15911  | 0.4108              | 0.4914     | -3.31               | 0.5752  | 0.6881              | -1.75      | 0.5661              | 0.6273  |
| 5104 | Zinc finger imprinted 3                             | Q96PE6  | 0.4108              | 0.4913     | -3.31               | 0.5752  | 0.6880              | -1.75      | 0.5661              | 0.6271  |
| 5105 | Zinc finger matrin-type protein 2                   | Q96NC0  | 0.4108              | 0.4912     | -3.31               | 0.5752  | 0.6878              | -1.75      | 0.5661              | 0.6270  |
| 5106 | Zinc finger MYM-type protein 2                      | Q9UBW7  | 0.0867              | 0.2048     | -0.30               | 0.1169  | 0.6341              | -0.26      | 0.3311              | 0.3936  |
| 5107 | Zinc finger MYND domain-containing protein 15       | Q9H091  | 0.0169              | 0.0759     | -1.14               | 0.0338  | 0.5391              | -0.67      | 0.0103              | 0.0474  |
| 5108 | Zinc finger protein 114                             | Q8NC26  | 0.0091              | 0.0567     | -0.33               | 0.2218  | 0.6584              | -0.20      | 0.0633              | 0.1466  |
| 5109 | Zinc finger protein 121                             | P58117  | 0.1115              | 0.2425     | 0.17                | 0.4448  | 0.5664              | 0.31       | 0.1320              | 0.2539  |
| 5110 | Zinc finger protein 136                             | P52737  | 0.0029              | 0.0360     | 0.66                | 0.0685  | 0.6614              | 0.29       | 0.0035              | 0.0314  |
| 5111 | Zinc finger protein 174                             | Q15697  | 0.4108              | 0.4911     | -3.31               | 0.5752  | 0.6876              | -1.75      | 0.5661              | 0.6268  |
| 5112 | Zinc finger protein 185                             | Q15231  | 0.0470              | 0.7318     | 0.01                | 0.0406  | 0.5669              | 0.12       | 0.0042              | 0.0325  |
| 5113 | Zinc finger protein 2                               | Q9B5G1  | 0.4108              | 0.4910     | -3.31               | 0.5752  | 0.6875              | -1.75      | 0.5661              | 0.6267  |
| 5114 | Zinc finger protein 243                             | Q8NDW4  | 0.4108              | 0.4909     | -3.31               | 0.5752  | 0.6873              | -1.75      | 0.5661              | 0.6266  |
| 5115 | Zinc finger protein 268                             | Q14978  | 0.4108              | 0.4908     | -3.31               | 0.5752  | 0.6872              | -1.75      | 0.5661              | 0.6264  |
| 5116 | Zinc finger protein 276                             | Q8NS54  | 0.8281              | 0.8620     | -0.03               | 0.1111  | 0.6324              | -0.40      | 0.6413              | 0.6941  |
| 5117 | Zinc finger protein 318                             | Q5VUA4  | 0.0034              | 0.0375     | -6.12               | 0.2891  | 0.6691              | -2.27      | 0.1553              | 0.2873  |
| 5118 | Zinc finger protein 324B                            | Q6AW86  | 0.4108              | 0.4906     | -3.31               | 0.5752  | 0.6870              | -1.75      | 0.5661              | 0.6265  |
| 5119 | Zinc finger protein 330                             | Q9Y3S2  | 0.0238              | 0.0924     | -0.21               | 0.5167  | 0.8390              | -0.14      | 0.0070              | 0.0395  |
| 5120 | Zinc finger protein 354C                            | Q86Y25  | 0.0109              | 0.0598     | -0.54               | 0.4924  | 0.8152              | -0.09      | 0.5316              | 0.7528  |
| 5121 | Zinc finger protein 382                             | Q96SR6  | 0.0002              | 0.0118     | 0.27                | 0.0745  | 0.6126              | 0.12       | 0.1792              | 0.3225  |
| 5122 | Zinc finger protein 383                             | Q8NA42  | 0.4108              | 0.4905     | -3.31               | 0.5752  | 0.6868              | -1.75      | 0.5661              | 0.6262  |
| 5123 | Zinc finger protein 394                             | Q53G03  | 0.4108              | 0.4904     | -3.31               | 0.5752  | 0.6867              | -1.75      | 0.5661              | 0.6260  |
| 5124 | Zinc finger protein 397                             | Q8NF99  | 0.0086              | 0.0547     | -2.38               | 0.2348  | 0.6614              | -1.29      | 0.0734              | 0.1620  |
| 5125 | Zinc finger protein 40                              | P15822  | 0.0405              | 0.1268     | -0.17               | 0.0240  | 0.4875              | 0.59       | 0.0348              | 0.0323  |
| 5126 | Zinc finger protein 42 homolog                      | Q96MM3  | 0.4108              | 0.4903     | -3.31               | 0.5752  | 0.6865              | -1.75      | 0.5661              | 0.6259  |
| 5127 | Zinc finger protein 428                             | Q9B6S4  | 0.0096              | 0.0354     | -0.29               | 0.2236  | 0.6641              | -0.14      | 0.4571              | 0.6723  |
| 5128 | Zinc finger protein 454                             | Q8N6P8  | 0.9643              | 0.9737     | 0.01                | 0.5158  | 0.8869              | -0.88      | 0.7470              | 0.7243  |
| 5129 | Zinc finger protein 468                             | Q5VY5   | 0.4108              | 0.4902     | -3.31               | 0.5752  | 0.6864              | -1.75      | 0.5661              | 0.6258  |
| 5130 | Zinc finger protein 469                             | Q96G99  | 0.1738              | 0.3352     | 0.07                | 0.2022  | 0.6596              | 0.26       | 0.0252              | 0.0789  |
| 5131 | Zinc finger protein 484                             | Q5VU22  | 0.0461              | 0.1371     | -0.48               | 0.2047  | 0.6594              | -0.64      | 0.2510              | 0.4178  |
| 5132 | Zinc finger protein 496                             | Q9JTG1  | 0.0474              | 0.1398     | -0.24               | 0.7132  | 0.7901              | 0.06       | 0.5319              | 0.7530  |
| 5133 | Zinc finger protein 511                             | Q8NB15  | 0.4108              | 0.4901     | -3.31               | 0.5752  | 0.6862              | -1.75      | 0.5661              | 0.6256  |
| 5134 | Zinc finger protein 518A                            | Q6AHz1  | 0.0371              | 0.1211     | -0.34               | 0.3099  | 0.5045              | -0.35      | 0.1678              | 0.3066  |
| 5135 | Zinc finger protein 541                             | Q9H0D2  | 0.5861              | 0.6532     | 0.07                | 0.1159  | 0.6360              | -0.23      | 0.8173              | 0.8520  |
| 5136 | Zinc finger protein 552                             | Q9H707  | 0.4108              | 0.4900     | -3.31               | 0.5752  | 0.6861              | -1.75      | 0.5661              | 0.6255  |
| 5137 | Zinc finger protein 57                              | Q6E8A5  | 0.0131              | 0.0666     | 0.20                | 0.5721  | 0.8846              | -0.07      | 0.0203              | 0.0685  |
| 5138 | Zinc finger protein 57 homolog                      | Q9NU63  | 0.3073              | 0.5079     | 0.06                | 0.9797  | 0.9862              | 0.00       | 0.1440              | 0.2703  |
| 5139 | Zinc finger protein 578                             | Q96N58  | 0.4108              | 0.4899     | -3.31               | 0.5752  | 0.6859              | -1.75      | 0.5661              | 0.6254  |
| 5140 | Zinc finger protein 616                             | Q08AN1  | 0.0962              | 0.2188     | 0.08                | 0.4035  | 0.7478              | 0.13       | 0.0414              | 0.1094  |
| 5141 | Zinc finger protein 620                             | Q6ZNG0  | 0.0107              | 0.0596     | 0.19                | 0.0056  | 0.3868              | 0.42       | 0.0314              | 0.0906  |
| 5142 | Zinc finger protein 648                             | Q5T619  | 0.0467              | 0.1383     | -0.63               | 0.5678  | 0.8822              | -0.11      | 0.0712              | 0.1590  |
| 5143 | Zinc finger protein 674                             | Q2M3X9  | 0.6328              | 0.6949     | 0.02                | 0.3078  | 0.6776              | 0.15       | 0.4137              | 0.6201  |
| 5144 | Zinc finger protein 678                             | Q5XNM1  | 0.4775              | 0.5528     | 1.56                | 0.2202  | 0.6597              | 0.96       | 0.5082              | 0.7298  |
| 5145 | Zinc finger protein 705A                            | Q9Z7N9  | 0.4108              | 0.4897     | -3.31               | 0.5752  | 0.6857              | -1.75      | 0.5661              | 0.6252  |
| 5146 | Zinc finger protein 763                             | Q0ZJ25  | 0.0860              | 0.2036     | 0.14                | 0.9073  | 0.9355              | -0.01      | 0.0913              | 0.1902  |
| 5147 | Zinc finger protein 781                             | Q8NSC0  | 0.7001              | 0.7541     | -0.09               | 0.1325  | 0.6487              | 0.51       | 0.3698              | 0.5676  |
| 5148 | Zinc finger protein 789                             | Q5FWF6  | 0.4108              | 0.4896     | -3.31               | 0.5752  | 0.6856              | -1.75      | 0.5661              | 0.6251  |
| 5149 | Zinc finger protein 791                             | Q3KP31  | 0.5421              | 0.6123     | -0.09               | 0.2154  | 0.6602              | 0.21       | 0.9344              | 0.9491  |
| 5150 | Zinc finger protein 8                               | P17098  | 0.4108              | 0.4895     | -3.31               | 0.5752  | 0.6854              | -1.75      | 0.5661              | 0.6250  |
| 5151 | Zinc finger protein 816                             | Q0VGE8  | 0.0218              | 0.0877     | -0.70               | 0.1327  | 0.6473              | -1.07      | 0.5664              | 0.6242  |
| 5152 | Zinc finger protein 830                             | Q96NB3  | 0.0117              | 0.0624     | 0.28                | 0.1630  | 0.6627              | 0.07       | 0.0144              | 0.0565  |
| 5153 | Zinc finger protein 837                             | Q96EG3  | 0.1230              | 0.2604     | -0.39               | 0.5422  | 0.8771              | -0.08      | 0.0388              | 0.1043  |
| 5154 | Zinc finger protein 891                             | AMT6T5  | 0.3170              | 0.5196     | -0.83               | 0.1527  | 0.6592              | 3.61       | 0.0636              | 0.1469  |
| 5155 | Zinc finger protein Aiolos                          | Q9UKT9  | 0.3069              | 0.5079     | 0.12                | 0.0668  | 0.6588              | -0.52      | 0.0323              | 0.0922  |
| 5156 | Zinc finger protein basophilin-2                    | Q6ZNG0  | 0.4108              | 0.4894     | -3.31               | 0.5752  | 0.6853              | -1.75      | 0.5661              | 0.6248  |
| 5157 | Zinc finger protein casein homolog 1                | Q86V15  | 0.0276              | 0.1005     | 0.15                | 0.0842  | 0.6222              | 0.19       | 0.1054              | 0.2126  |
| 5158 | Zinc finger protein DZIP1                           | Q86YF9  | 0.4108              | 0.4893     | -3.31               | 0.5752  | 0.6851              | -1.75      | 0.5661              | 0.6247  |
| 5159 | Zinc finger protein Eos                             | Q9H2S9  | 0.5726              | 0.6401     | 0.14                | 0.6282  | 0.7251              | 0.17       | 0.0471              | 0.1202  |
| 5160 | Zinc finger protein GLI1                            | P08151  | 0.3372              | 0.5447     | -0.06               | 0.0369  | 0.5508              | 0.23       | 0.2272              | 0.3864  |
| 5161 | Zinc finger protein Helios                          | Q9GKS7  | 0.0002              | 0.0116     | -4.03               | 0.1950  | 0.6604              | -2.77      | 0.0630              | 0.0370  |
| 5162 | Zinc finger protein neuro-d4                        | Q72782  | 0.6485              | 0.7096     | 0.03                | 0.4865  | 0.8103              | -0.06      | 0.4527              | 0.6669  |
| 5163 | Zinc finger protein RIF                             | Q13129  | 0.0016              | 0.0268     | 0.30                | 0.1563  | 0.6620              | 0.23       | 0.0016              | 0.0236  |
| 5164 | Zinc finger protein ubi-d4                          | Q92785  | 0.4108              | 0.4892     | -3.31               | 0.5752  | 0.6850              | -1.75      | 0.5661              | 0.6246  |
| 5165 | Zinc finger protein with KRAB and SCAN domains 1    | P17029  | 0.2147              | 0.3894     | -0.65               | 0.2951  | 0.6716              | -2.09      | 0.0130              | 0.0534  |
| 5166 | Zinc finger protein with KRAB and SCAN domains 3    | Q9BRR0  | 0.5660              | 0.6338     | 0.05                | 0.5752  | 0.8712              | -0.12      | 0.8492              | 0.8700  |
| 5167 | Zinc finger protein with KRAB and SCAN domains 4    | Q969J2  | 0.4108              | 0.4891     | -3.31               | 0.5752  | 0.6848              | -1.75      | 0.5661              | 0.6244  |
| 5168 | Zinc finger protein ZPR1                            | Q75312  | 0.2255              | 0.4042     | -0.09               | 0.7954  | 0.8515              | 0.06       | 0.7224              | 0.7671  |
| 5169 | Zinc finger protein-like 1                          | Q95159  | 0.7224              | 0.7730     | 0.01                | 0.1371  | 0.6509              | 0.06       | 0.0121              | 0.0515  |
| 5170 | Zinc finger Ran-binding domain-containing protein 2 | Q95218  | 0.1371              | 0.2818     | -0.11               | 0.9051  | 0.9338              | 0.01       | 0.3525              | 0.5469  |
| 5171 | Zinc finger SWIM domain-containing protein 1        | Q9BR11  | 0.3348              | 0.5414     | -0.40               | 0.4850  | 0.8091              | -0.35      | 0.2224              | 0.0732  |
| 5172 | Zinc finger SWIM domain-containing protein 4        | Q9H7M6  | 0.0007              | 0.0192     | 1.13                | 0.2480  | 0.6888              | -0.28      | 0.1154              | 0.3702  |
| 5173 | Zinc finger SWIM domain-containing protein 5        | Q9P217  | 0.8488              | 0.8795     | -0.01               | 0.1005  | 0.6333              | -0.06      | 0.0003              | 0.0216  |

Supplementary Table S2. Overview on all relatively quantified 5180 proteins statistical analysis

|              |                                              | MCF-7               |         |            |                     |         |            |                     |         |            |                     |         |            | MDA-MB-231          |         |            |                     |         |            |                     |         |            |                     |         |            |                     |         |            |        |
|--------------|----------------------------------------------|---------------------|---------|------------|---------------------|---------|------------|---------------------|---------|------------|---------------------|---------|------------|---------------------|---------|------------|---------------------|---------|------------|---------------------|---------|------------|---------------------|---------|------------|---------------------|---------|------------|--------|
|              |                                              | Dai SC20 vs control |         |            | Gen SC20 vs control |         |            | SSE SC20 vs control |         |            | Dai IC20 vs control |         |            | Gen IC20 vs control |         |            | SSE IC20 vs control |         |            | Dai IC20 vs control |         |            | Gen IC20 vs control |         |            | SSE IC20 vs control |         |            |        |
| Protein name |                                              | UniProt             | p value | BH q value | log2FC              | p value | BH q value | log2FC              | p value | BH q value | log2FC              | p value | BH q value | log2FC              | p value | BH q value | log2FC              | p value | BH q value | log2FC              | p value | BH q value | log2FC              | p value | BH q value | log2FC              | p value | BH q value | log2FC |
| 5174         | Zinc finger SWIM domain-containing protein 6 | Q9HCJ5              | 0.0168  | 0.0757     | 0.40                | 0.0307  | 0.5097     | 0.35                | 0.0731  | 0.1618     | -0.24               | 0.8410  | 0.8635     | -0.02               | 0.0335  | 0.1334     | 0.39                | 0.7985  | 1.0359     | 0.02                | 0.3736  | 0.4388     | -2.55               | 0.8708  | 0.9198     | -0.33               | 0.0651  | 0.1150     | 2.06   |
| 5175         | Zinc finger transcription factor Trps1       | Q9UHF7              | 0.4108  | 0.4890     | -3.31               | 0.5752  | 0.6846     | -1.75               | 0.5661  | 0.6243     | -1.19               | 0.5388  | 0.5908     | 0.89                | 0.2938  | 0.3918     | -1.88               | 0.9510  | 0.9599     | 0.09                | 0.1596  | 0.3525     | -0.16               | 0.1865  | 0.4766     | 0.20                | 0.8250  | 0.8585     | -0.10  |
| 5176         | Zinc finger-containing ubiquitin peptidase 1 | Q96AP4              | 0.0115  | 0.0616     | 0.16                | 0.5325  | 0.8498     | 0.08                | 0.2652  | 0.4361     | 0.07                | 0.0049  | 0.0280     | 0.21                | 0.1632  | 0.3473     | 0.06                | 0.0155  | 0.0829     | 0.22                | 0.1476  | 0.3326     | 2.31                | 0.3235  | 0.6765     | 1.73                | 0.1084  | 0.1651     | 2.90   |
| 5177         | Zinc phosphodiesterase ELAC protein 2        | Q9BQ52              | 0.0683  | 0.1737     | 0.24                | 0.2648  | 0.6639     | 0.10                | 0.7355  | 0.7786     | 0.03                | 0.3201  | 0.4911     | -0.11               | 0.2690  | 0.4906     | 0.11                | 0.1955  | 0.3707     | -0.12               | 0.0560  | 0.1876     | 0.17                | 0.6944  | 1.1368     | -0.02               | 0.1354  | 0.1961     | -0.07  |
| 5178         | Zona pellucida sperm-binding protein 1       | P60852              | 0.4108  | 0.4888     | -3.31               | 0.5752  | 0.6845     | -1.75               | 0.5661  | 0.6242     | -1.19               | 0.5388  | 0.5907     | 0.89                | 0.2938  | 0.3917     | -1.88               | 0.9510  | 0.9597     | 0.09                | 0.0009  | 0.0398     | 0.97                | 0.1118  | 0.3417     | 0.22                | 0.0063  | 0.0747     | 0.66   |
| 5179         | Zygote arrest protein 1                      | Q86SH2              | 0.0311  | 0.1090     | 0.40                | 0.2298  | 0.6609     | 0.13                | 0.1527  | 0.2836     | 0.17                | 0.4823  | 0.6832     | 0.07                | 0.5269  | 0.6133     | -0.07               | 0.2252  | 0.4083     | 0.16                | 0.3736  | 0.4967     | -2.55               | 0.8708  | 1.0275     | -0.33               | 0.0651  | 0.1394     | 2.06   |
| 5180         | Zyxin                                        | Q15942              | 0.0914  | 0.2119     | -0.07               | 0.8058  | 0.8599     | 0.03                | 0.8946  | 0.9162     | -0.01               | 0.0919  | 0.1819     | 0.11                | 0.0121  | 0.0785     | 0.13                | 0.0411  | 0.1335     | 0.09                | 0.7409  | 0.7785     | -0.04               | 0.3661  | 0.7356     | -0.09               | 0.2423  | 0.3126     | -0.10  |
